# Supplementary material for: Genetic Variation in the Magnitude and Longevity of the IgG Subclass Response to a Diphtheria-Tetanus-Acellular Pertussis (DTaP) Vaccine in Mice
Source: Vaccines (Basel). 2019 Sep 20;7(4):124. doi: 10.3390/vaccines7040124 (PMC6963843; doi:10.3390/vaccines7040124)
Supplement: Supplementary file 1 [file vaccines-07-00124-s001.zip]

Archive with 8 entries (8 files):
- Supplemental Data/longevityIgG1_genelist.xlsx
- Supplemental Data/longevityIgG2b_genelist.xlsx
- Supplemental Data/longevityIgG3_genelist.xlsx
- Supplemental Data/Mosley Supplementary Figures Sep 3 2019.pdf
- Supplemental Data/w14IgG1to3_genelist.xlsx
- Supplemental Data/wk14IgG1_genelist.xlsx
- Supplemental Data/wk14IgG2b_genelist.xlsx
- Supplemental Data/wk14IgG3_genelist.xlsx
