# Supplementary material for: Genetic Variation in the Magnitude and Longevity of the IgG Subclass Response to a Diphtheria-Tetanus-Acellular Pertussis (DTaP) Vaccine in Mice
Source: Vaccines (Basel). 2019 Sep 20;7(4):124. doi: 10.3390/vaccines7040124 (PMC6963843; doi:10.3390/vaccines7040124)
Supplement: Supplementary file 1 [file vaccines-07-00124-s001.zip › Supplemental Data/longevityIgG1_genelist.xlsx]

## Sheet: longevityIgG1DT_genelist
Gene Name	Ensembl Gene ID	Chromosome	Start	End
C230034O21Rik	ENSMUSG00000086181	3	38773492	38787181
Gm9845	ENSMUSG00000050533	3	39257180	39257827
Rpl21-ps10	ENSMUSG00000064315	3	38006330	38006877
Ankrd50	ENSMUSG00000044864	3	38348183	38383766
Fat4	ENSMUSG00000046743	3	38785862	38910907
SNORA17	ENSMUSG00000089520	3	39698554	39698638
n-R5s195	ENSMUSG00000064825	3	39534886	39535004
AC162799.1	ENSMUSG00000092986	3	38166760	38167006
U1	ENSMUSG00000065945	3	39565210	39565369
AC114901.1	ENSMUSG00000076385	3	38457031	38457136
Gm10356	ENSMUSG00000072387	3	46854304	46855563
Pcdh10	ENSMUSG00000049100	3	45182320	45238488
Pabpc4l	ENSMUSG00000090919	3	46246119	46251863
2610316D01Rik	ENSMUSG00000086101	3	45084362	45182182
U1	ENSMUSG00000064579	3	45621658	45621820
U6	ENSMUSG00000089584	3	45782500	45782617
SNORA17	ENSMUSG00000077256	3	46093755	46093886
Pitpnb	ENSMUSG00000050017	5	111759783	111817379
Mn1	ENSMUSG00000070576	5	111846382	111886053
C130026L21Rik	ENSMUSG00000052848	5	112010442	112016965
Zfp932	ENSMUSG00000066613	5	110425540	110439430
Gm17655	ENSMUSG00000090963	5	110475251	110475505
Plcxd1	ENSMUSG00000064247	5	110528988	110534972
Gtpbp6	ENSMUSG00000033434	5	110532994	110537216
Zfp605	ENSMUSG00000023284	5	110539111	110560756
Chfr	ENSMUSG00000014668	5	110564859	110600991
Golga3	ENSMUSG00000029502	5	110605720	110655489
Ankle2	ENSMUSG00000029501	5	110660060	110685666
Pgam5	ENSMUSG00000029500	5	110688149	110698932
Pxmp2	ENSMUSG00000029499	5	110703301	110715205
Pole	ENSMUSG00000007080	5	110715325	110766493
P2rx2	ENSMUSG00000029503	5	110768831	110772168
Gm1679	ENSMUSG00000072754	5	110783115	110785106
Fbrsl1	ENSMUSG00000043323	5	110790773	110877522
Galnt9	ENSMUSG00000033316	5	110973364	111050401
Noc4l	ENSMUSG00000033294	5	111077437	111082436
Ddx51	ENSMUSG00000029504	5	111082470	111089515
Ep400	ENSMUSG00000029505	5	111093392	111199736
Pus1	ENSMUSG00000029507	5	111202686	111209678
Ulk1	ENSMUSG00000029512	5	111213507	111239116
Hscb	ENSMUSG00000043510	5	111258089	111268796
Chek2	ENSMUSG00000029521	5	111269036	111303152
Gm17724	ENSMUSG00000090661	5	110814854	110817092
1010001B22Rik	ENSMUSG00000091434	5	110424530	110425417
Gm15484	ENSMUSG00000081865	5	110547041	110547868
Gm15787	ENSMUSG00000086247	5	110583419	110605523
Gm15788	ENSMUSG00000087439	5	110691180	110706286
Gm15791	ENSMUSG00000081256	5	110757223	110757541
Gm15792	ENSMUSG00000085606	5	110760225	110762222
A630023P12Rik	ENSMUSG00000048215	5	110943942	110954999
Gm15559	ENSMUSG00000086401	5	111199968	111208279
Ttc28	ENSMUSG00000033209	5	111308822	111718800
Gm15989	ENSMUSG00000081104	5	111334263	111334760
Gm15988	ENSMUSG00000083771	5	111437499	111437865
E130006D01Rik	ENSMUSG00000085271	5	112163304	112190745
Gm16019	ENSMUSG00000085919	5	112171869	112177196
Gm16728	ENSMUSG00000087494	5	110688182	110698866
Gm17598	ENSMUSG00000091066	5	111208901	111210146
U6	ENSMUSG00000065775	5	111106143	111106249
SNORA49	ENSMUSG00000077254	5	111121068	111121200
U6	ENSMUSG00000065071	5	111186104	111186210
Mir701	ENSMUSG00000076163	5	111433163	111433271
SNORA70	ENSMUSG00000087722	5	110757051	110757202
Cryba4	ENSMUSG00000066975	5	112675513	112681538
Crybb1	ENSMUSG00000029343	5	112684835	112698605
Tpst2	ENSMUSG00000029344	5	112705711	112744381
Tfip11	ENSMUSG00000029345	5	112755378	112767093
Srrd	ENSMUSG00000029346	5	112766412	112772060
Hps4	ENSMUSG00000042328	5	112772103	112807434
Gm6583	ENSMUSG00000051503	5	112782821	112785053
Asphd2	ENSMUSG00000029348	5	112814468	112821233
Sez6l	ENSMUSG00000058153	5	112848180	113006205
Gm6588	ENSMUSG00000072722	5	112878446	112880758
Myo18b	ENSMUSG00000072720	5	113117896	113325382
Adrbk2	ENSMUSG00000042249	5	113339498	113444811
Crybb2	ENSMUSG00000042240	5	113487278	113499137
Crybb3	ENSMUSG00000029352	5	113504859	113510604
2900026A02Rik	ENSMUSG00000051339	5	113515343	113592371
Tmem211	ENSMUSG00000066964	5	113655929	113668283
Sgsm1	ENSMUSG00000042216	5	113672240	113739806
Aym1	ENSMUSG00000053873	5	113786314	113786841
Wscd2	ENSMUSG00000063430	5	113919467	114039679
Cmklr1	ENSMUSG00000042190	5	114062363	114100435
1700069L16Rik	ENSMUSG00000042184	5	114142431	114174781
Ficd	ENSMUSG00000053334	5	114185791	114190609
Sart3	ENSMUSG00000018974	5	114192455	114221658
Gm3511	ENSMUSG00000069196	5	114217108	114217421
Iscu	ENSMUSG00000025825	5	114222757	114228297
Tmem119	ENSMUSG00000054675	5	114243738	114250525
Selplg	ENSMUSG00000048163	5	114267807	114280510
RP23-459I1.1	ENSMUSG00000093637	5	112803389	112806659
Wscd2	ENSMUSG00000085571	5	113919772	113919960
Gm15736	ENSMUSG00000085713	5	114094972	114095691
Miat	ENSMUSG00000086878	5	112642248	112657968
AC151577.1	ENSMUSG00000093343	5	113690296	113690368
U6	ENSMUSG00000065373	5	113473164	113473272
Coro1c	ENSMUSG00000004530	5	114292445	114358767
Gm17122	ENSMUSG00000090458	5	114292610	114293125
U6	ENSMUSG00000065320	5	114378733	114378813
Ssh1	ENSMUSG00000042121	5	114387103	114443903
Dao	ENSMUSG00000042096	5	114453712	114475458
Svop	ENSMUSG00000042078	5	114476919	114541579
Usp30	ENSMUSG00000029592	5	114550342	114573515
Alkbh2	ENSMUSG00000044339	5	114573935	114578227
Ung	ENSMUSG00000029591	5	114580395	114589332
Acacb	ENSMUSG00000042010	5	114596544	114700770
Gm16108	ENSMUSG00000089734	5	114515470	114539475
Foxn4	ENSMUSG00000042002	5	114704173	114723816
Gm13784	ENSMUSG00000084243	5	114687185	114687934
Myo1h	ENSMUSG00000066952	5	114764950	114814585
Kctd10	ENSMUSG00000001098	5	114813576	114830524
Ube3b	ENSMUSG00000029577	5	114830637	114871177
Gm13789	ENSMUSG00000085590	5	114813424	114815366
Mmab	ENSMUSG00000029575	5	114881043	114894068
Mvk	ENSMUSG00000041939	5	114894278	114910600
BC057022	ENSMUSG00000041930	5	115018025	115063229
Trpv4	ENSMUSG00000014158	5	115072161	115108430
Gltp	ENSMUSG00000011884	5	115119412	115140993
Tchp	ENSMUSG00000002486	5	115157769	115172336
Gm13790	ENSMUSG00000086302	5	115001298	115004025
Git2	ENSMUSG00000041890	5	115177416	115225526
Ankrd13a	ENSMUSG00000041870	5	115224686	115256209
4930515G01Rik	ENSMUSG00000092183	5	115223746	115224992
1500011B03Rik	ENSMUSG00000072694	5	115258205	115263985
Gm20499	ENSMUSG00000092252	5	115259045	115273469
1500011B03Rik	ENSMUSG00000092279	5	115262802	115263954
2610524H06Rik	ENSMUSG00000092486	5	115271944	115273477
Gm13821	ENSMUSG00000078186	5	115292358	115292871
Gm13820	ENSMUSG00000078187	5	115266974	115267111
Gm13819	ENSMUSG00000082052	5	115278582	115279224
4930519G04Rik	ENSMUSG00000029564	5	115303673	115333668
Gm9936	ENSMUSG00000054123	5	115305767	115308691
Gm13823	ENSMUSG00000080707	5	115317690	115318034
Oasl2	ENSMUSG00000029561	5	115346943	115362243
Oasl1	ENSMUSG00000041827	5	115373249	115387924
Gm13822	ENSMUSG00000087477	5	115367327	115373286
2210016L21Rik	ENSMUSG00000029559	5	115392167	115399792
Hnf1a	ENSMUSG00000029556	5	115398370	115421076
Gm13824	ENSMUSG00000086054	5	115418793	115448055
Gm13825	ENSMUSG00000086140	5	115418832	115421409
Sppl3	ENSMUSG00000029550	5	115461146	115548799
Gm10401	ENSMUSG00000072693	5	115547698	115548304
Acads	ENSMUSG00000029545	5	115560308	115569355
Unc119b	ENSMUSG00000046562	5	115572559	115584984
Mlec	ENSMUSG00000048578	5	115592990	115608188
Cabp1	ENSMUSG00000029544	5	115618698	115644390
Pop5	ENSMUSG00000060152	5	115685845	115695360
Rnf10	ENSMUSG00000041740	5	115691421	115722907
Gm13827	ENSMUSG00000086167	5	115503430	115503855
Gm13826	ENSMUSG00000072692	5	115552931	115560277
Gm13828	ENSMUSG00000083182	5	115648352	115648714
Coq5	ENSMUSG00000041733	5	115729675	115746981
Gm13831	ENSMUSG00000083875	5	115713102	115713403
Dynll1	ENSMUSG00000009013	5	115747119	115751008
Srsf9	ENSMUSG00000029538	5	115777186	115783089
Gatc	ENSMUSG00000029536	5	115783251	115791187
Gm13829	ENSMUSG00000082610	5	115741772	115741909
Gm13830	ENSMUSG00000086368	5	115751129	115769217
Triap1	ENSMUSG00000029535	5	115791234	115793578
Cox6a1	ENSMUSG00000041697	5	115795651	115798990
Tnrc18	ENSMUSG00000039477	5	143512088	143579341
Gm1977	ENSMUSG00000079127	5	143419272	143435261
Fbxl18	ENSMUSG00000066640	5	143628625	143657100
Actb	ENSMUSG00000029580	5	143664794	143668433
Fscn1	ENSMUSG00000029581	5	143722022	143734864
Rnf216	ENSMUSG00000045078	5	143752572	143874673
Olfr718-ps1	ENSMUSG00000090981	5	143898926	143899915
Rbak	ENSMUSG00000061898	5	143933865	143942454
4933411G11Rik	ENSMUSG00000029586	5	143942696	143966754
Spdyb	ENSMUSG00000039296	5	143977995	143988569
Zfp12	ENSMUSG00000029587	5	143996842	144010513
Zfp316	ENSMUSG00000046658	5	144011376	144031701
E130309D02Rik	ENSMUSG00000039244	5	144062874	144077039
Zdhhc4	ENSMUSG00000001844	5	144078168	144090935
Grid2ip	ENSMUSG00000010825	5	144119017	144153831
Kdelr2	ENSMUSG00000079111	5	144165499	144182951
Daglb	ENSMUSG00000039206	5	144225361	144265310
Rac1	ENSMUSG00000001847	5	144266346	144288904
2810453I06Rik	ENSMUSG00000048910	5	144309574	144325393
2810453I06Rik	ENSMUSG00000083012	5	144309576	144325399
Cyth3	ENSMUSG00000018001	5	144383316	144471119
Usp42	ENSMUSG00000051306	5	144471194	144493149
Eif2ak1	ENSMUSG00000029613	5	144578657	144665125
Ankrd61	ENSMUSG00000029607	5	144651610	144658554
Aimp2	ENSMUSG00000029610	5	144663573	144670716
Pms2	ENSMUSG00000079109	5	144670833	144698178
Rsph10b2	ENSMUSG00000075569	5	144693904	144746588
Ccz1	ENSMUSG00000029617	5	144748785	144775722
Ocm	ENSMUSG00000029618	5	144780673	144787539
Lmtk2	ENSMUSG00000038970	5	144861305	144949073
Bhlha15	ENSMUSG00000052271	5	144951155	144955310
Tecpr1	ENSMUSG00000066621	5	144955311	144984484
Bri3	ENSMUSG00000047843	5	145005306	145207626
Baiap2l1	ENSMUSG00000038859	5	145025395	145118981
Nptx2	ENSMUSG00000059991	5	145306756	145318347
D430018E03Rik	ENSMUSG00000013989	5	143635756	143640052
D130017N08Rik	ENSMUSG00000087189	5	144519194	144527999
Gm15770	ENSMUSG00000082308	5	143614295	143614878
4930448H16Rik	ENSMUSG00000089879	5	143989397	143996427
0610040B10Rik	ENSMUSG00000089889	5	144090926	144094383
RP23-372N19.1	ENSMUSG00000093720	5	144152409	144165427
9530056K15Rik	ENSMUSG00000045345	5	144158927	144161242
Gm17135	ENSMUSG00000091351	5	144683446	144741860
2900089D17Rik	ENSMUSG00000087484	5	145002559	145017055
Gm15708	ENSMUSG00000086894	5	145037930	145041382
Gm15709	ENSMUSG00000083574	5	145167471	145167683
U6	ENSMUSG00000064963	5	144774867	144774970
Tmem130	ENSMUSG00000043388	5	145496784	145522518
Gm6272	ENSMUSG00000082524	5	145484496	145484666
9530026P05Rik	ENSMUSG00000087573	6	92890363	93222883
4930590J08Rik	ENSMUSG00000034063	6	91864753	91900634
Fgd5	ENSMUSG00000034037	6	91928872	92025998
C130022K22Rik	ENSMUSG00000034083	6	91828047	91849842
4930466I24Rik	ENSMUSG00000087317	6	91962388	91966111
Nr2c2	ENSMUSG00000005893	6	92041384	92123051
Mrps25	ENSMUSG00000014551	6	92119519	92134027
Zfyve20	ENSMUSG00000014550	6	92136706	92164919
Trh	ENSMUSG00000005892	6	92192055	92194644
Prickle2	ENSMUSG00000030020	6	92320886	92656139
Adamts9	ENSMUSG00000030022	6	92722693	92893486
A730049H05Rik	ENSMUSG00000048636	6	92766472	92797168
Gm15737	ENSMUSG00000079462	6	92819351	92834405
Magi1	ENSMUSG00000045095	6	93625449	94233316
SNORA17	ENSMUSG00000077180	6	93285452	93285582
SNORA17	ENSMUSG00000088630	6	93459567	93459696
U6	ENSMUSG00000088627	6	93743766	93743871
Gm4459	ENSMUSG00000083626	7	146845587	146846054
Gm16201	ENSMUSG00000086742	7	147136295	147164876
Gm2044	ENSMUSG00000085354	7	147142904	147143938
Tcerg1l	ENSMUSG00000091002	7	145400657	145589413
Mapk1ip1	ENSMUSG00000041775	7	146027506	146037956
Ppp2r2d	ENSMUSG00000041769	7	146037762	146074740
Bnip3	ENSMUSG00000078566	7	146082519	146101202
Jakmip3	ENSMUSG00000056856	7	146132413	146269875
Dpysl4	ENSMUSG00000025478	7	146271900	146288603
Stk32c	ENSMUSG00000015981	7	146289537	146399206
Lrrc27	ENSMUSG00000015980	7	146398887	146428878
Pwwp2b	ENSMUSG00000060260	7	146434381	146453152
Inpp5a	ENSMUSG00000025477	7	146575008	146765551
Nkx6-2	ENSMUSG00000041309	7	146765276	146768696
E030019B06Rik	ENSMUSG00000070357	7	146786979	146802208
9330101J02Rik	ENSMUSG00000049571	7	146824677	146869716
Rpl21-ps13	ENSMUSG00000056777	7	146905298	146905780
Gpr123	ENSMUSG00000025475	7	147020073	147063987
Kndc1	ENSMUSG00000066129	7	147080595	147127436
Utf1	ENSMUSG00000047751	7	147129688	147131011
6430531B16Rik	ENSMUSG00000073795	7	147158202	147164654
Adam8	ENSMUSG00000025473	7	147164831	147178461
Mir202	ENSMUSG00000065502	7	147143588	147143659
U6	ENSMUSG00000064575	7	145293116	145293222
Tubgcp2	ENSMUSG00000025474	7	147181854	147222289
Zfp511	ENSMUSG00000025470	7	147222290	147226504
Msx3	ENSMUSG00000025469	7	147232056	147235039
Caly	ENSMUSG00000025468	7	147255786	147268447
Prap1	ENSMUSG00000025467	7	147279294	147283099
1810014F10Rik	ENSMUSG00000025466	7	147282669	147288340
Echs1	ENSMUSG00000025465	7	147291609	147302375
Paox	ENSMUSG00000025464	7	147311556	147320233
Mtg1	ENSMUSG00000039018	7	147323463	147336685
Sprn	ENSMUSG00000045733	7	147336527	147340776
Olfr522	ENSMUSG00000051180	7	147347838	147348913
Olfr523	ENSMUSG00000051051	7	147361960	147363015
Olfr524	ENSMUSG00000050366	7	147387642	147388699
Cd163l1	ENSMUSG00000025461	7	147404166	147417044
Gm15520	ENSMUSG00000085449	9	28867384	28877784
Gm15521	ENSMUSG00000085638	9	29398069	29400095
Opcml	ENSMUSG00000062257	9	27598360	28732995
Ntm	ENSMUSG00000059974	9	28802335	29770726
7SK	ENSMUSG00000088881	9	29069998	29070200
U6	ENSMUSG00000064713	9	30099453	30099559
Snx19	ENSMUSG00000031993	9	30234693	30274311
Adamts15	ENSMUSG00000033453	9	30706740	30730037
Adamts8	ENSMUSG00000031994	9	30750147	30771423
Gm10698	ENSMUSG00000079884	9	33535831	33536436
Arhgap32	ENSMUSG00000041444	9	31923721	32076031
Kcnj5	ENSMUSG00000032034	9	32122368	32151822
Kcnj1	ENSMUSG00000041248	9	32180003	32206777
Fli1	ENSMUSG00000016087	9	32229793	32348974
Ets1	ENSMUSG00000032035	9	32443806	32565405
U6	ENSMUSG00000064492	9	32254407	32254513
SNORA17	ENSMUSG00000088905	9	33725077	33725207
A130066N16Rik	ENSMUSG00000053889	9	34725818	34737094
4930581F22Rik	ENSMUSG00000070315	9	34924313	34938507
Kirrel3	ENSMUSG00000032036	9	34293711	34844301
St3gal4	ENSMUSG00000032038	9	34854164	34924395
Dcps	ENSMUSG00000032040	9	34931993	34983646
Gm17346	ENSMUSG00000091603	9	34396111	34396889
5S_rRNA	ENSMUSG00000089465	9	34767604	34767733
SNORA48	ENSMUSG00000088056	9	34952221	34952364
Tirap	ENSMUSG00000032041	9	34992136	35007876
Srpr	ENSMUSG00000032042	9	35007760	35055558
Foxred1	ENSMUSG00000039048	9	35011791	35018640
Fam118b	ENSMUSG00000050471	9	35024550	35075390
Rpusd4	ENSMUSG00000032044	9	35075450	35085316
Gm5614	ENSMUSG00000066771	9	35089103	35089420
Cdon	ENSMUSG00000038119	9	35228713	35315236
1700110K17Rik	ENSMUSG00000087047	9	40131011	40151149
Gm16095	ENSMUSG00000086014	9	40526989	40528069
Gm16096	ENSMUSG00000087135	9	40588825	40592264
Gm16214	ENSMUSG00000086360	9	41830698	41842196
Olfr983	ENSMUSG00000044205	9	39899602	39901143
Olfr984	ENSMUSG00000045812	9	39908129	39909073
Olfr985	ENSMUSG00000049073	9	39934509	39935624
Tmem225	ENSMUSG00000040541	9	39955707	39958465
Gm4893	ENSMUSG00000070308	9	39972215	39972544
Olfr986	ENSMUSG00000051095	9	39994664	39995679
Zfp202	ENSMUSG00000025602	9	39999901	40021189
Scn3b	ENSMUSG00000049281	9	40076801	40099203
Gramd1b	ENSMUSG00000040111	9	40100818	40338968
9030425E11Rik	ENSMUSG00000032024	9	40494045	40593402
Hspa8	ENSMUSG00000015656	9	40609067	40613283
Bsx	ENSMUSG00000054360	9	40682210	40686055
4931429I11Rik	ENSMUSG00000032023	9	40702932	40772201
Crtam	ENSMUSG00000032021	9	40780881	40812669
Ubash3b	ENSMUSG00000032020	9	40819181	40969780
2610203C20Rik	ENSMUSG00000074415	9	41388824	41400910
Sorl1	ENSMUSG00000049313	9	41772803	41932380
Gm17540	ENSMUSG00000090869	9	40338740	40341205
D230004N17Rik	ENSMUSG00000087130	9	41283020	41423263
Snord14e	ENSMUSG00000064791	9	40612831	40612920
Snord14c	ENSMUSG00000075876	9	40611666	40611751
U6	ENSMUSG00000064909	9	41147519	41147624
Mir100	ENSMUSG00000093011	9	41339508	41339587
Mirlet7a-2	ENSMUSG00000092770	9	41344799	41344894
Mir125b-1	ENSMUSG00000093354	9	41390009	41390085
AC136021.1	ENSMUSG00000093182	9	40010934	40011250
Snord14d	ENSMUSG00000075924	9	40612078	40612163
2810417H13Rik	ENSMUSG00000040204	9	65738044	65751073
Csnk1g1	ENSMUSG00000032384	9	65756781	65892816
Ppib	ENSMUSG00000032383	9	65907976	65914436
Snx22	ENSMUSG00000039452	9	65912983	65917538
Snx1	ENSMUSG00000032382	9	65935940	65974394
Fam96a	ENSMUSG00000032381	9	65974418	65986762
Dapk2	ENSMUSG00000032380	9	66006030	66120049
Herc1	ENSMUSG00000038664	9	66198257	66356582
Fbxl22	ENSMUSG00000050503	9	66356266	66362400
Usp3	ENSMUSG00000032376	9	66362444	66440949
Gm16218	ENSMUSG00000059571	9	65145339	65145726
Kbtbd13	ENSMUSG00000054978	9	65237944	65239459
Oaz2	ENSMUSG00000040652	9	65515808	65538107
Gm16073	ENSMUSG00000079915	9	65685974	65686490
Gm15563	ENSMUSG00000086387	9	66419808	66429866
Plekho2	ENSMUSG00000050721	9	65402193	65427847
Ptplad1	ENSMUSG00000033629	9	64834792	64869524
Clpx	ENSMUSG00000015357	9	65142067	65178465
Pdcd7	ENSMUSG00000041837	9	65193875	65207450
Gm514	ENSMUSG00000086228	9	65208867	65228184
Rasl12	ENSMUSG00000041696	9	65246295	65262660
Ostb	ENSMUSG00000053862	9	65260560	65270580
Mtfmt	ENSMUSG00000059183	9	65283589	65300861
Spg21	ENSMUSG00000032388	9	65308744	65336277
Ankdd1a	ENSMUSG00000066510	9	65349260	65364806
Rab11a	ENSMUSG00000004771	9	64563106	64585565
2010321M09Rik	ENSMUSG00000034263	9	64808639	64834781
Parp16	ENSMUSG00000032392	9	65062497	65087026
Cilp	ENSMUSG00000042254	9	65112987	65128413
Rbpms2	ENSMUSG00000032387	9	65477455	65508335
Zfp609	ENSMUSG00000040524	9	65539391	65675371
Trip4	ENSMUSG00000032386	9	65678943	65756601
Igdcc3	ENSMUSG00000032394	9	64988961	65033664
Dennd4a	ENSMUSG00000053641	9	64659147	64767474
Dpp8	ENSMUSG00000032393	9	64880265	64930457
Igdcc4	ENSMUSG00000032816	9	64949293	64985747
Slc24a1	ENSMUSG00000034452	9	64770668	64799414
Pif1	ENSMUSG00000041064	9	65434967	65443774
Megf11	ENSMUSG00000036466	9	64233433	64557012
SNORA17	ENSMUSG00000077385	9	65800121	65800252
AC110235.1	ENSMUSG00000093316	9	65181085	65181318
U5	ENSMUSG00000075930	9	65049533	65049648
n-R5s85	ENSMUSG00000065387	9	65684160	65684272
U6	ENSMUSG00000065301	9	65748008	65748115
U5	ENSMUSG00000075763	9	65044379	65044494
AC122463.1	ENSMUSG00000093119	9	64819476	64819600
U6	ENSMUSG00000084437	9	66208448	66208549
AC161366.1	ENSMUSG00000089574	9	64989093	64989163
SNORA17	ENSMUSG00000089336	9	64729591	64729732
Car12	ENSMUSG00000032373	9	66561493	66614652
Aph1b	ENSMUSG00000032375	9	66623009	66643297
Gm10647	ENSMUSG00000074232	9	66644846	66646881
BC050972	ENSMUSG00000092131	9	66646485	66652166
Ppp1r2-ps4	ENSMUSG00000059237	9	66653113	66653745
Aph1c	ENSMUSG00000053040	9	66662801	66682533
Gm17098	ENSMUSG00000091745	9	66682506	66683341
Rab8b	ENSMUSG00000036943	9	66691479	66767512
Rps27l	ENSMUSG00000036781	9	66793893	66797323
Lactb	ENSMUSG00000032370	9	66803200	66823291
Tpm1	ENSMUSG00000032366	9	66870397	66897213
U6	ENSMUSG00000089450	9	66828895	66828992
U1	ENSMUSG00000088021	9	66952015	66952162
Tln2	ENSMUSG00000052698	9	67064894	67407510
Mir190	ENSMUSG00000076379	9	67084458	67084542
Tmem108	ENSMUSG00000042757	9	103385266	103664167
Nphp3	ENSMUSG00000032558	9	103904874	103946060
Acad11	ENSMUSG00000090150	9	103942992	104029976
Uba5	ENSMUSG00000032557	9	103948929	103965464
Ccrl1	ENSMUSG00000041748	9	103986487	104004890
Ccrl1	ENSMUSG00000079355	9	104000468	104028973
Dnajc13	ENSMUSG00000032560	9	104053927	104165260
Acpp	ENSMUSG00000032561	9	104190581	104240058
Cpne4	ENSMUSG00000032564	9	104449616	104936874
Mrpl3	ENSMUSG00000032563	9	104955569	104979796
Nudt16	ENSMUSG00000032565	9	105031668	105034135
1700080E11Rik	ENSMUSG00000032566	9	105045674	105047412
Nek11	ENSMUSG00000035032	9	105064797	105297854
Aste1	ENSMUSG00000032567	9	105297722	105308088
Atp2c1	ENSMUSG00000032570	9	105305869	105429649
RP24-553E23.2	ENSMUSG00000093590	9	105110526	105114193
Gm15619	ENSMUSG00000085430	9	105235843	105250710
SNORA17	ENSMUSG00000089116	9	104383698	104383840
Mir2136	ENSMUSG00000089406	9	104328443	104328517
AC117688.1	ENSMUSG00000088204	9	104897246	104897349
Pik3r4	ENSMUSG00000032571	9	105545325	105589985
Col6a6	ENSMUSG00000043719	9	105591747	105730415
Col6a5	ENSMUSG00000091345	9	105758400	105862974
Gm5621	ENSMUSG00000057626	9	105462448	105463092
U4	ENSMUSG00000084659	9	105575795	105575881
Col6a4	ENSMUSG00000032572	9	105891785	105999114
U6	ENSMUSG00000084714	9	105904049	105904129
Gm7628	ENSMUSG00000025644	9	108996358	109000310
3000002C10Rik	ENSMUSG00000070282	9	109730457	109735220
Mtap4	ENSMUSG00000047011	9	109939793	109942971
Prkar2a	ENSMUSG00000032601	9	108594474	108651843
Ip6k2	ENSMUSG00000032599	9	108686127	108708664
Nckipsd	ENSMUSG00000032598	9	108710730	108720783
Celsr3	ENSMUSG00000023473	9	108728651	108755294
Slc26a6	ENSMUSG00000023259	9	108756368	108764472
Tmem89	ENSMUSG00000025652	9	108816950	108817894
Uqcrc1	ENSMUSG00000025651	9	108838661	108851685
Col7a1	ENSMUSG00000025650	9	108855631	108886920
Ucn2	ENSMUSG00000049699	9	108888208	108889209
Pfkfb4	ENSMUSG00000025648	9	108893947	108934737
Shisa5	ENSMUSG00000025647	9	108941079	108960238
Trex1	ENSMUSG00000049734	9	108960447	108962852
Atrip	ENSMUSG00000025646	9	108960447	108976638
Ccdc72	ENSMUSG00000091537	9	108980502	108984895
Ccdc51	ENSMUSG00000025645	9	108985008	108995877
Plxnb1	ENSMUSG00000053646	9	108997950	109022425
Fbxw21	ENSMUSG00000047237	9	109041968	109064555
Fbxw13	ENSMUSG00000049314	9	109081741	109098489
Fbxw20	ENSMUSG00000061701	9	109119946	109137268
Fbxw14	ENSMUSG00000054087	9	109173350	109190190
Fbxw28	ENSMUSG00000079284	9	109225400	109242173
Fbxw22	ENSMUSG00000070324	9	109280925	109306810
Fbxw16	ENSMUSG00000074062	9	109334833	109351654
Fbxw19	ENSMUSG00000074061	9	109381084	109398389
Fbxw15	ENSMUSG00000074060	9	109455118	109470776
Fbxw24	ENSMUSG00000062275	9	109503631	109528571
Fbxw18	ENSMUSG00000074059	9	109579248	109605214
Fbxw26	ENSMUSG00000059547	9	109620080	109648603
Spink8	ENSMUSG00000050074	9	109714794	109729147
Nme6	ENSMUSG00000032478	9	109735263	109745630
Camp	ENSMUSG00000038357	9	109749889	109751970
Cdc25a	ENSMUSG00000032477	9	109778083	109796392
Mtap4	ENSMUSG00000032479	9	109833962	109986451
Dhx30	ENSMUSG00000032480	9	109986824	110020334
Gm10615	ENSMUSG00000074056	9	110020207	110022420
Smarcc1	ENSMUSG00000032481	9	110034541	110142682
Cspg5	ENSMUSG00000032482	9	110146287	110165079
2610002I17Rik	ENSMUSG00000054836	9	110207696	110224596
Scap	ENSMUSG00000032485	9	110235792	110287450
5830462I19Rik	ENSMUSG00000091102	9	110274552	110277934
Ptpn23	ENSMUSG00000036057	9	110287593	110310714
Ngp	ENSMUSG00000032484	9	110322254	110325514
Klhl18	ENSMUSG00000054792	9	110328431	110379198
Kif9	ENSMUSG00000032489	9	110379462	110427683
Setd2	ENSMUSG00000044791	9	110435101	110521137
Nradd	ENSMUSG00000032491	9	110523641	110526897
Nbeal2	ENSMUSG00000056724	9	110527293	110556665
Ccdc12	ENSMUSG00000019659	9	110559007	110614094
U6	ENSMUSG00000075737	9	109198056	109198162
AC161246.1	ENSMUSG00000092980	9	109870199	109870494
U6	ENSMUSG00000075913	9	109260743	109260849
Mir711	ENSMUSG00000076142	9	108871967	108872048
SNORA17	ENSMUSG00000064877	9	110024183	110024320
SNORA28	ENSMUSG00000088626	9	108697574	108697719
AC168054.1	ENSMUSG00000093067	9	108746809	108746894
U6	ENSMUSG00000065674	9	108641083	108641189
U6	ENSMUSG00000075710	9	109250038	109250144
Pth1r	ENSMUSG00000032492	9	110624592	110649649
Myl3	ENSMUSG00000059741	9	110666150	110672308
Prss42	ENSMUSG00000044664	9	110700670	110706240
Prss44	ENSMUSG00000032493	9	110716498	110727027
Prss43	ENSMUSG00000058398	9	110729194	110734006
Prss45	ENSMUSG00000047257	9	110737092	110743817
Prss46	ENSMUSG00000049719	9	110747010	110759026
Prss50	ENSMUSG00000048752	9	110760471	110767132
Tmie	ENSMUSG00000049555	9	110768215	110782617
Als2cl	ENSMUSG00000044037	9	110782374	110803034
Tdgf1	ENSMUSG00000032494	9	110842114	110848662
Lrrc2	ENSMUSG00000032495	9	110854049	110886570
Rtp3	ENSMUSG00000066319	9	110887449	110892217
Gm10030	ENSMUSG00000057802	9	110907315	110909334
Ltf	ENSMUSG00000032496	9	110921796	110945270
Ccrl2	ENSMUSG00000043953	9	110957339	110959774
Lrrfip2	ENSMUSG00000032497	9	111020615	111128172
U7	ENSMUSG00000088296	9	110977898	110977960
Mlh1	ENSMUSG00000032498	9	111130732	111174112
7SK	ENSMUSG00000089082	9	111147096	111147371
Epm2aip1	ENSMUSG00000046785	9	111174349	111181593
Trank1	ENSMUSG00000062296	9	111214243	111298278
Dclk3	ENSMUSG00000032500	9	111341585	111392115
Stac	ENSMUSG00000032502	9	111463941	111592852
n-R5s90	ENSMUSG00000077156	9	111516402	111516519
Atp2b1	ENSMUSG00000019943	10	98377786	98488777
Poc1b	ENSMUSG00000019952	10	98569670	98660708
Galnt4	ENSMUSG00000090035	10	98570793	98575881
Phxr2	ENSMUSG00000055108	10	98588151	98588955
Dusp6	ENSMUSG00000019960	10	98725865	98730122
B530045E10Rik	ENSMUSG00000044633	10	98883156	98885681
Gad1-ps	ENSMUSG00000090665	10	98906364	98909641
Csl	ENSMUSG00000046934	10	99220339	99222292
Kitl	ENSMUSG00000019966	10	99478264	99563047
Gm16239	ENSMUSG00000089994	10	98641818	98647244
AC167229.1	ENSMUSG00000077034	10	99606888	99606997
AC167229.2	ENSMUSG00000077043	10	99602135	99602244
Gm8701	ENSMUSG00000091739	10	99788062	99794069
Gm4301	ENSMUSG00000091918	10	99798310	99799225
Gm4302	ENSMUSG00000091101	10	99803490	99804374
Gm4303	ENSMUSG00000090421	10	99808624	99809493
Gm4305	ENSMUSG00000091715	10	99813745	99814614
Gm8711	ENSMUSG00000091552	10	99818871	99819750
Gm4307	ENSMUSG00000091170	10	99823990	99824859
Gm4308	ENSMUSG00000091145	10	99829133	99830048
Gm8723	ENSMUSG00000091738	10	99839096	99839969
Gm4312	ENSMUSG00000091915	10	99844279	99845194
Gm4781	ENSMUSG00000090987	10	99858921	99859706
Tmtc3	ENSMUSG00000036676	10	99906536	99949984
Cep290	ENSMUSG00000019971	10	99950923	100036289
Gm15662	ENSMUSG00000089855	10	104675190	104675348
Gm15666	ENSMUSG00000084399	10	104943272	104944195
Gm15664	ENSMUSG00000089904	10	104957516	104957699
Gm15663	ENSMUSG00000085282	10	105011009	105020930
Tmtc2	ENSMUSG00000036019	10	104624719	105011507
BC067068	ENSMUSG00000036009	10	105200241	105278436
Ccdc59	ENSMUSG00000019897	10	105278123	105284889
Rps15a-ps1	ENSMUSG00000056877	10	105629434	105629826
U6	ENSMUSG00000089019	10	104302260	104302364
U1	ENSMUSG00000089182	10	103908107	103908263
SNORA17	ENSMUSG00000077407	10	104577263	104577391
AC132471.1	ENSMUSG00000080525	10	105287151	105287228
U1	ENSMUSG00000064432	10	104477329	104477494
SNORA61	ENSMUSG00000088415	10	105366668	105366799
n-R5s80	ENSMUSG00000084545	10	105241143	105241253
SNORA17	ENSMUSG00000088084	10	105493014	105493135
Meis1	ENSMUSG00000020160	11	18780433	18918961
Gm16140	ENSMUSG00000084085	11	18909131	18911186
Spred2	ENSMUSG00000045671	11	19824378	19924029
Actr2	ENSMUSG00000020152	11	19962307	20012916
Rab1	ENSMUSG00000020149	11	20101435	20126859
Cep68	ENSMUSG00000044066	11	20127040	20149432
Slc1a4	ENSMUSG00000020142	11	20202183	20232716
Gm12033	ENSMUSG00000078965	11	20234837	20236087
Sertad2	ENSMUSG00000049800	11	20443256	20553024
Gm12023	ENSMUSG00000085806	11	18495251	18610225
8430419K02Rik	ENSMUSG00000085743	11	18745854	18774312
Gm16141	ENSMUSG00000087507	11	18913820	18915157
4933406G16Rik	ENSMUSG00000086025	11	18965279	18975743
Gm12025	ENSMUSG00000081054	11	19260929	19261072
Gm12026	ENSMUSG00000082737	11	19283688	19284711
Gm12027	ENSMUSG00000086911	11	19526764	19528064
Glns-ps1	ENSMUSG00000082100	11	19620358	19621475
Gm12028	ENSMUSG00000083601	11	19649422	19650069
Gm12029	ENSMUSG00000081820	11	19683655	19684486
Gm12030	ENSMUSG00000081346	11	20042571	20042793
Gm12031	ENSMUSG00000085035	11	20045570	20046347
Rpl12-ps2	ENSMUSG00000083792	11	20190066	20190386
Gm12034	ENSMUSG00000083878	11	20346415	20346813
Gm12035	ENSMUSG00000083555	11	20474570	20475192
U6	ENSMUSG00000084442	11	20094636	20094738
SCARNA21	ENSMUSG00000089210	11	19593158	19593301
7SK	ENSMUSG00000088262	11	20144709	20144916
U6	ENSMUSG00000065384	11	18638698	18638799
U1	ENSMUSG00000089390	11	18702257	18702425
Aftph	ENSMUSG00000049659	11	20585087	20641592
Gm12036	ENSMUSG00000084252	11	20629423	20629952
1110067D22Rik	ENSMUSG00000042363	11	20723579	20731059
Peli1	ENSMUSG00000020134	11	20991294	21050326
Vps54	ENSMUSG00000020128	11	21138892	21221139
Ugp2	ENSMUSG00000001891	11	21221141	21271204
Mdh1	ENSMUSG00000020321	11	21456790	21472370
Wdpcp	ENSMUSG00000020319	11	21472238	21798992
Gm12037	ENSMUSG00000086749	11	20731484	20731922
Gm12038	ENSMUSG00000082157	11	20747479	20747685
2610024D14Rik	ENSMUSG00000084362	11	20999537	20999830
Gm12040	ENSMUSG00000084259	11	21106413	21106949
Gm12041	ENSMUSG00000082898	11	21127658	21128259
Gm12039	ENSMUSG00000081868	11	21180048	21180227
Gm12042	ENSMUSG00000084048	11	21195563	21195863
Gm12043	ENSMUSG00000087253	11	21270403	21274164
Gm12044	ENSMUSG00000084412	11	21351145	21351357
Gm12045	ENSMUSG00000082607	11	21391317	21391889
Gm12046	ENSMUSG00000082040	11	21393628	21393958
4932414J04Rik	ENSMUSG00000078962	11	21394733	21411181
Pgam1-ps1	ENSMUSG00000083761	11	21583311	21584059
Mir1933	ENSMUSG00000089555	11	21244591	21244678
SNORA17	ENSMUSG00000089155	11	21149425	21149563
7SK	ENSMUSG00000088223	11	21097711	21097979
AL663049.1	ENSMUSG00000093168	11	21464564	21464652
SNORA65	ENSMUSG00000064671	11	20747756	20747884
Otx1	ENSMUSG00000005917	11	21894767	21902900
Ehbp1	ENSMUSG00000042302	11	21905831	22242295
Tmem17	ENSMUSG00000049904	11	22412091	22419237
Gm12047	ENSMUSG00000084004	11	21777010	21777953
Rpl15-ps1	ENSMUSG00000082874	11	21853143	21853706
Rpsa-ps3	ENSMUSG00000083580	11	22286295	22288199
Gm12050	ENSMUSG00000085856	11	22338824	22339778
Gm12051	ENSMUSG00000085021	11	22383611	22391366
Gm12052	ENSMUSG00000086256	11	22517411	22518490
Gm12053	ENSMUSG00000083008	11	22526378	22526667
Gm17335	ENSMUSG00000090797	11	22500338	22510882
Gm6685	ENSMUSG00000032889	11	28239128	28239814
Ccdc85a	ENSMUSG00000032878	11	28285685	28484324
Efemp1	ENSMUSG00000020467	11	28753204	28826743
Pnpt1	ENSMUSG00000020464	11	29030744	29061828
Smek2	ENSMUSG00000020463	11	29072890	29120797
Ccdc104	ENSMUSG00000020462	11	29121532	29147409
Ccdc88a	ENSMUSG00000032740	11	29273658	29410812
Prorsd1	ENSMUSG00000032673	11	29411757	29415033
Mtif2	ENSMUSG00000020459	11	29426408	29445279
Rps27a	ENSMUSG00000020460	11	29445846	29448109
1700034F02Rik	ENSMUSG00000020461	11	29447950	29478367
Gm12079	ENSMUSG00000084064	11	27783112	27783355
Gm12080	ENSMUSG00000083201	11	27946035	27949117
Gm12081	ENSMUSG00000084905	11	28260362	28264339
2810471M01Rik	ENSMUSG00000084966	11	28581564	28593276
Gm12082	ENSMUSG00000085510	11	28651633	28715767
Rpsa-ps5	ENSMUSG00000081695	11	28856724	28857608
Gm12084	ENSMUSG00000081518	11	28920374	28920984
A630052C17Rik	ENSMUSG00000086725	11	29070909	29073558
Gm12085	ENSMUSG00000083298	11	29233383	29234322
Gm12086	ENSMUSG00000080827	11	29239455	29239682
Gm12087	ENSMUSG00000082721	11	29254199	29254456
Gm12089	ENSMUSG00000085165	11	29415086	29417355
Mir216a	ENSMUSG00000065539	11	28657012	28657083
Mir216b	ENSMUSG00000076318	11	28646191	28646276
U6atac	ENSMUSG00000080517	11	29234934	29235059
Mir217	ENSMUSG00000065415	11	28663728	28663835
Gm12090	ENSMUSG00000081575	11	29452082	29453010
2610204G07Rik	ENSMUSG00000084860	13	105475011	105485074
Gm4938	ENSMUSG00000071193	13	105708859	105709266
Sgtb	ENSMUSG00000042743	13	104899821	104931815
Srek1	ENSMUSG00000032621	13	104531695	104564539
Erbb2ip	ENSMUSG00000021709	13	104608867	104710594
Nln	ENSMUSG00000021710	13	104813488	104899694
Ppwd1	ENSMUSG00000021713	13	104995201	105018924
Cenpk	ENSMUSG00000021714	13	105019035	105041728
2410002O22Rik	ENSMUSG00000021711	13	104932229	104968549
2410002O22Rik	ENSMUSG00000078936	13	104963802	104968519
Trim23	ENSMUSG00000021712	13	104968877	104993452
Adamts6	ENSMUSG00000046169	13	105077953	105284843
Cwc27	ENSMUSG00000021715	13	105421220	105607222
Srek1ip1	ENSMUSG00000021716	13	105582564	105629354
Fam159b	ENSMUSG00000042655	13	105635363	105653973
Rgs7bp	ENSMUSG00000021719	13	105737233	105845010
4933425L06Rik	ENSMUSG00000021718	13	105872202	105911862
Rnf180	ENSMUSG00000021720	13	105921444	106061119
Htr1a	ENSMUSG00000021721	13	106233773	106238213
SNORA17	ENSMUSG00000077578	13	106013349	106013478
U6	ENSMUSG00000064922	13	104432006	104432112
Tdrd3	ENSMUSG00000022019	14	87816390	87945315
Diap3	ENSMUSG00000022021	14	87055174	87541031
U6	ENSMUSG00000064407	14	86711096	86711185
U1	ENSMUSG00000087812	14	86808329	86808468
SNORA48	ENSMUSG00000088536	14	87746052	87746194
Gm10119	ENSMUSG00000062611	14	88522821	88523615
5S_rRNA	ENSMUSG00000089120	14	88526805	88526904
Pcdh20	ENSMUSG00000050505	14	88864554	88871203
Acot10	ENSMUSG00000047565	15	20594974	20596505
Cdh12	ENSMUSG00000040452	15	21041207	21519288
SNORA17	ENSMUSG00000089258	15	20838627	20838754
SNORA17	ENSMUSG00000089320	15	20114587	20114716
U6	ENSMUSG00000064812	15	21044124	21044230
Gsdmc	ENSMUSG00000079025	15	63607526	63640314
Gsdmc2	ENSMUSG00000056293	15	63655901	63667504
Gsdmcl1	ENSMUSG00000062543	15	63678864	63682497
Gsdmc3	ENSMUSG00000055827	15	63689826	63700852
Gsdmc4	ENSMUSG00000055748	15	63722820	63734491
Fam49b	ENSMUSG00000022378	15	63760652	63892010
H2afy3	ENSMUSG00000056590	15	62049096	62050958
Pvt1	ENSMUSG00000072566	15	61869542	62209651
U6	ENSMUSG00000065936	15	63857503	63857607
SNORA17	ENSMUSG00000088897	15	62624756	62624889
AC134453.1	ENSMUSG00000093058	15	62484490	62484559
U7	ENSMUSG00000088828	15	63312769	63312831

## Sheet: longevityIgG1-PT
Gene Name	Ensembl Gene ID	Chromosome	Start	End
Erbb4	ENSMUSG00000062209	1	68078760	69154633
Kif22-ps	ENSMUSG00000082473	1	67631627	67633610
Gm15669	ENSMUSG00000085075	1	67839055	67851898
Gm15671	ENSMUSG00000087329	1	68051660	68072470
Gm15670	ENSMUSG00000083795	1	68339854	68340300
Gm16076	ENSMUSG00000087514	1	69138487	69153314
Gm8840	ENSMUSG00000084332	1	69177488	69177873
AC101833.1	ENSMUSG00000093213	1	68020250	68020351
AC101752.1	ENSMUSG00000093566	1	67663549	67663626
U6atac	ENSMUSG00000080539	1	68431516	68431609
Ikzf2	ENSMUSG00000025997	1	69577788	69732534
Fam78b	ENSMUSG00000060568	1	168931548	169021433
Uck2	ENSMUSG00000053664	1	169153958	169154050
Uck2	ENSMUSG00000026558	1	169156221	169215258
Tmco1	ENSMUSG00000052428	1	169238801	169264109
Aldh9a1	ENSMUSG00000026687	1	169280122	169298661
Mgst3	ENSMUSG00000026688	1	169302097	169323972
Lrrc52	ENSMUSG00000040485	1	169375806	169396911
Rxrg	ENSMUSG00000015843	1	169528515	169569754
Lmx1a	ENSMUSG00000026686	1	169619370	169778872
Pbx1	ENSMUSG00000052534	1	170050130	170362401
RP23-45N11.1	ENSMUSG00000093538	1	170045375	170052596
U6	ENSMUSG00000064426	1	169279156	169279262
mmu-mir-2134-1	ENSMUSG00000088246	1	169270500	169270555
Ola1	ENSMUSG00000027108	2	72930858	73056981
Sp9	ENSMUSG00000068859	2	73109982	73122763
Cir1	ENSMUSG00000041777	2	73121162	73150758
Scrn3	ENSMUSG00000008226	2	73150658	73175875
Gpr155	ENSMUSG00000041762	2	73179563	73224629
Wipf1	ENSMUSG00000075284	2	73267667	73367791
Chrna1	ENSMUSG00000027107	2	73401272	73418395
Chn1	ENSMUSG00000056486	2	73448717	73613403
Atf2	ENSMUSG00000027104	2	73654566	73730696
Atp5g3	ENSMUSG00000018770	2	73746504	73749383
Lnp	ENSMUSG00000009207	2	74358348	74417492
Evx2	ENSMUSG00000001815	2	74491049	74497918
Hoxd13	ENSMUSG00000001819	2	74506367	74509656
Hoxd12	ENSMUSG00000001823	2	74512986	74515763
Hoxd11	ENSMUSG00000042499	2	74517449	74525798
Hoxd10	ENSMUSG00000050368	2	74529147	74533163
Gm14396	ENSMUSG00000086077	2	74533577	74535432
Hoxd9	ENSMUSG00000043342	2	74535737	74538265
Hoxd8	ENSMUSG00000027102	2	74542672	74545990
Gm10822	ENSMUSG00000075281	2	73731053	73738907
Gm13666	ENSMUSG00000083569	2	72969802	72970600
Gm13664	ENSMUSG00000083976	2	73014668	73015012
Gm13703	ENSMUSG00000085519	2	73195325	73202390
Gm13709	ENSMUSG00000086546	2	73208966	73217354
D230022J07Rik	ENSMUSG00000087176	2	73225027	73258555
Gm13707	ENSMUSG00000085768	2	73259966	73267199
Gm13708	ENSMUSG00000086069	2	73297762	73315659
Gm13705	ENSMUSG00000086382	2	73422907	73427265
Gm13704	ENSMUSG00000086544	2	73434583	73454069
Gm13706	ENSMUSG00000085838	2	73496327	73498320
Gm13640	ENSMUSG00000081062	2	73647219	73647482
Gm13668	ENSMUSG00000083072	2	73797726	73798721
A630050E04Rik	ENSMUSG00000085387	2	73938981	73940399
Gm13667	ENSMUSG00000084791	2	73973814	73988891
4930441J16Rik	ENSMUSG00000085405	2	74136997	74145774
4930445N08Rik	ENSMUSG00000087205	2	74417133	74422601
Mrpl23-ps1	ENSMUSG00000075279	2	74429387	74429974
Gm13672	ENSMUSG00000082973	2	74469897	74470355
Gm20440	ENSMUSG00000092315	2	74521503	74532251
1700109F18Rik	ENSMUSG00000052371	2	74541305	74554187
6720416L17Rik	ENSMUSG00000075277	2	74586479	74600953
Gm14424	ENSMUSG00000085015	2	74590741	74591801
Gm14426	ENSMUSG00000086559	2	74592512	74593154
Gm14425	ENSMUSG00000081156	2	74693763	74694368
Gm14427	ENSMUSG00000083837	2	74724429	74725063
Gm13652	ENSMUSG00000087333	2	74962928	74975855
Hoxd3	ENSMUSG00000079277	2	74549986	74586331
Hoxd4	ENSMUSG00000042464	2	74560035	74567217
Hoxd1	ENSMUSG00000042448	2	74601037	74603200
Mtx2	ENSMUSG00000027099	2	74663860	74716488
n-R5s198	ENSMUSG00000084574	2	74773472	74773571
Mir10b	ENSMUSG00000065500	2	74564127	74564194
U6	ENSMUSG00000065237	2	74462699	74462805
AL928889.1	ENSMUSG00000092951	2	73459484	73459771
A330043C09Rik	ENSMUSG00000086044	2	74985175	75015715
Gm13654	ENSMUSG00000081406	2	75029091	75029887
Gm13653	ENSMUSG00000075276	2	75030334	75030849
Gm13659	ENSMUSG00000086200	2	75149137	75151238
Gm13658	ENSMUSG00000087504	2	75274114	75282236
Gm13660	ENSMUSG00000086576	2	75297023	75302845
Gm13655	ENSMUSG00000082152	2	75470695	75471439
Hnrnpa3	ENSMUSG00000059005	2	75497318	75507464
AL772404.1	ENSMUSG00000093242	2	75497301	75497374
Nfe2l2	ENSMUSG00000015839	2	75513570	75542698
Agps	ENSMUSG00000042410	2	75670234	75769407
E030042O20Rik	ENSMUSG00000087222	2	75542827	75548081
Gm13656	ENSMUSG00000087527	2	75567649	75568229
Gm13657	ENSMUSG00000086813	2	75615245	75620363
Gm13669	ENSMUSG00000081833	2	75646415	75646871
Gm13670	ENSMUSG00000082187	2	75660085	75660850
U6	ENSMUSG00000089015	2	75524797	75524895
Ttc30b	ENSMUSG00000075273	2	75773920	75776519
Ttc30a2	ENSMUSG00000075272	2	75814129	75816257
Ttc30a1	ENSMUSG00000075271	2	75817163	75820024
Pde11a	ENSMUSG00000075270	2	75827198	76176831
Cyct	ENSMUSG00000056436	2	76191999	76198507
Rbm45	ENSMUSG00000042369	2	76208041	76221825
C230034O21Rik	ENSMUSG00000086181	3	38773492	38787181
Gm9845	ENSMUSG00000050533	3	39257180	39257827
Rpl21-ps10	ENSMUSG00000064315	3	38006330	38006877
Ankrd50	ENSMUSG00000044864	3	38348183	38383766
Fat4	ENSMUSG00000046743	3	38785862	38910907
SNORA17	ENSMUSG00000089520	3	39698554	39698638
n-R5s195	ENSMUSG00000064825	3	39534886	39535004
AC162799.1	ENSMUSG00000092986	3	38166760	38167006
U1	ENSMUSG00000065945	3	39565210	39565369
AC114901.1	ENSMUSG00000076385	3	38457031	38457136
Gm10356	ENSMUSG00000072387	3	46854304	46855563
Pcdh10	ENSMUSG00000049100	3	45182320	45238488
Pabpc4l	ENSMUSG00000090919	3	46246119	46251863
2610316D01Rik	ENSMUSG00000086101	3	45084362	45182182
U1	ENSMUSG00000064579	3	45621658	45621820
U6	ENSMUSG00000089584	3	45782500	45782617
SNORA17	ENSMUSG00000077256	3	46093755	46093886
0610037L13Rik	ENSMUSG00000028608	4	107562418	107571989
Cpt2	ENSMUSG00000028607	4	107576586	107596215
Slc1a7	ENSMUSG00000008932	4	107640937	107686137
Podn	ENSMUSG00000028600	4	107687396	107704942
Scp2	ENSMUSG00000028603	4	107716444	107817603
Echdc2	ENSMUSG00000028601	4	107838042	107851913
Zyg11a	ENSMUSG00000034645	4	107854539	107890527
Zyg11b	ENSMUSG00000034636	4	107902329	107973701
2010305A19Rik	ENSMUSG00000048351	4	108000745	108014149
Fam159a	ENSMUSG00000059816	4	108040382	108055954
Gpx7	ENSMUSG00000028597	4	108072995	108079566
Zcchc11	ENSMUSG00000034610	4	108132031	108232026
Prpf38a	ENSMUSG00000063800	4	108235777	108251941
Orc1	ENSMUSG00000028587	4	108252028	108288633
Cc2d1b	ENSMUSG00000028582	4	108292545	108306728
AL626783.1	ENSMUSG00000090599	4	108295534	108297821
Zfyve9	ENSMUSG00000034557	4	108310071	108453403
Btf3l4	ENSMUSG00000028568	4	108486900	108506219
Txndc12	ENSMUSG00000028567	4	108507206	108534732
A730015C16Rik	ENSMUSG00000090551	4	108520004	108521224
Kti12	ENSMUSG00000073775	4	108520462	108522017
Rab3b	ENSMUSG00000003411	4	108551668	108615929
Nrd1	ENSMUSG00000053510	4	108673260	108734382
Osbpl9	ENSMUSG00000028559	4	108733750	108874877
Calr4	ENSMUSG00000028558	4	108907090	108927176
Eps15	ENSMUSG00000028552	4	108952873	109060422
Ttc39a	ENSMUSG00000028555	4	109079228	109117350
Rnf11	ENSMUSG00000028557	4	109123703	109157333
4930522H14Rik	ENSMUSG00000060491	4	109177942	109203902
Cdkn2c	ENSMUSG00000028551	4	109333481	109339794
Faf1	ENSMUSG00000010517	4	109349193	109636565
4930407G08Rik	ENSMUSG00000086713	4	107626537	107633326
Gm12742	ENSMUSG00000083957	4	107982961	107983756
Gm12740	ENSMUSG00000081734	4	107994943	107995250
Gm12738	ENSMUSG00000083255	4	108123412	108123947
Gm12739	ENSMUSG00000083783	4	108156776	108157157
Gm12737	ENSMUSG00000085093	4	108186386	108189422
Gm12743	ENSMUSG00000084968	4	108265030	108292454
Gm17354	ENSMUSG00000091985	4	108306448	108310046
Gm12741	ENSMUSG00000082374	4	108404347	108404902
Gm12736	ENSMUSG00000082699	4	108606178	108606413
8030443G20Rik	ENSMUSG00000086483	4	108615448	108644682
Gm12749	ENSMUSG00000083512	4	109046306	109047464
Gm12750	ENSMUSG00000085873	4	109076399	109078760
Gm12811	ENSMUSG00000087641	4	109241819	109329396
Gm12803	ENSMUSG00000082771	4	109302187	109303330
9630013D21Rik	ENSMUSG00000059027	4	109324134	109330458
Gm12808	ENSMUSG00000083995	4	109427019	109427422
U6	ENSMUSG00000070174	4	108139549	108139655
U6	ENSMUSG00000065299	4	108170649	108170751
U6	ENSMUSG00000087714	4	108194529	108194635
SNORA17	ENSMUSG00000077687	4	109209644	109209774
U6	ENSMUSG00000084593	4	108210096	108210202
U6	ENSMUSG00000089051	4	107714302	107714405
U6	ENSMUSG00000088285	4	108671207	108671311
7SK	ENSMUSG00000088014	4	108833529	108833802
Mir761	ENSMUSG00000076444	4	108690260	108690335
Dmrta2	ENSMUSG00000047143	4	109650658	109656292
3010003L10Rik	ENSMUSG00000085256	4	109649343	109650418
3110047P20Rik	ENSMUSG00000090061	5	64040342	64201785
Gm9954	ENSMUSG00000054714	5	64041189	64041503
0610040J01Rik	ENSMUSG00000060512	5	64203734	64290858
Rell1	ENSMUSG00000047881	5	64300135	64360144
Pgm1	ENSMUSG00000029171	5	64484175	64519594
Tbc1d1	ENSMUSG00000029174	5	64550690	64742725
Klf3	ENSMUSG00000029178	5	65194628	65221368
Tlr1	ENSMUSG00000044827	5	65316050	65324000
Tlr6	ENSMUSG00000051498	5	65344345	65351287
Fam114a1	ENSMUSG00000029185	5	65361310	65433113
Tmem156	ENSMUSG00000037913	5	65456368	65482794
Klhl5	ENSMUSG00000054920	5	65498807	65559427
Wdr19	ENSMUSG00000037890	5	65590935	65651654
Rfc1	ENSMUSG00000029191	5	65653091	65726909
Klb	ENSMUSG00000029195	5	65739625	65775242
Rpl9	ENSMUSG00000047215	5	65779603	65782682
Lias	ENSMUSG00000029199	5	65782736	65801932
Ugdh	ENSMUSG00000029201	5	65804441	65827185
1110003E01Rik	ENSMUSG00000037822	5	65838083	65928423
Gm3687	ENSMUSG00000090138	5	64085429	64085749
Gm15819	ENSMUSG00000087552	5	64315140	64316208
Gm15824	ENSMUSG00000083435	5	64581271	64582228
Gm15823	ENSMUSG00000081143	5	64643817	64644445
Gm6044	ENSMUSG00000083100	5	64711495	64711993
AC122043.1	ENSMUSG00000093029	5	65038872	65038988
AC132271.2	ENSMUSG00000093780	5	64498646	64498741
SNORA17	ENSMUSG00000087954	5	64535487	64535620
Mir574	ENSMUSG00000077042	5	65361557	65361634
AC132271.1	ENSMUSG00000093235	5	64492669	64492746
5S_rRNA	ENSMUSG00000087748	5	65527541	65527659
SNORA17	ENSMUSG00000077209	5	64393592	64393723
Zfp644	ENSMUSG00000049606	5	106929913	107126306
Gm17304	ENSMUSG00000091096	5	107038117	107038220
Hfm1	ENSMUSG00000043410	5	107269211	107355340
Cdc7	ENSMUSG00000029283	5	107393341	107413451
Tgfbr3	ENSMUSG00000029287	5	107535589	107718648
Brdt	ENSMUSG00000029279	5	107760178	107816077
Ephx4	ENSMUSG00000033805	5	107831755	107859054
Lpcat2b	ENSMUSG00000033794	5	107860568	107864058
Btbd8	ENSMUSG00000070632	5	107867016	107920647
A830010M20Rik	ENSMUSG00000044060	5	107924917	108009615
1700028K03Rik	ENSMUSG00000089798	5	107937963	107980568
Glmn	ENSMUSG00000029276	5	107977986	108026907
Rpap2	ENSMUSG00000033773	5	108026392	108090857
Gfi1	ENSMUSG00000029275	5	108145674	108155056
Evi5	ENSMUSG00000011831	5	108173814	108304126
1700013N18Rik	ENSMUSG00000063447	5	108259272	108260361
Rpl5	ENSMUSG00000058558	5	108329521	108338024
Fam69a	ENSMUSG00000029270	5	108337072	108416104
Mtf2	ENSMUSG00000029267	5	108494693	108538023
Tmed5	ENSMUSG00000063406	5	108535385	108561639
Ccdc18	ENSMUSG00000056531	5	108561933	108661966
Dr1	ENSMUSG00000029265	5	108697916	108709545
Pigg	ENSMUSG00000029263	5	108741628	108778374
Gm10419	ENSMUSG00000072769	5	108798877	108807258
Pde6b	ENSMUSG00000029491	5	108817410	108861416
Atp5k	ENSMUSG00000050856	5	108862263	108863467
Mfsd7a	ENSMUSG00000029490	5	108870073	108877910
Pcgf3	ENSMUSG00000033623	5	108890251	108935995
Gm17717	ENSMUSG00000091666	5	108088116	108117034
Olfr719-ps	ENSMUSG00000067047	5	107335757	107335999
Gm8145	ENSMUSG00000084218	5	107670642	107671386
Gm8152	ENSMUSG00000081798	5	107810400	107811036
Gm17202	ENSMUSG00000090558	5	107833842	107860929
Gm9727	ENSMUSG00000089628	5	107907545	107908099
A930041C12Rik	ENSMUSG00000085900	5	108059269	108062869
A430072P03Rik	ENSMUSG00000090030	5	108154177	108157821
Gm16007	ENSMUSG00000083609	5	108273409	108273694
Gm9850	ENSMUSG00000084855	5	108431279	108431505
Gm17696	ENSMUSG00000090531	5	106894817	106900026
U6atac	ENSMUSG00000088602	5	107099018	107099140
SNORA66	ENSMUSG00000077222	5	108334196	108334327
SNORA66	ENSMUSG00000077426	5	108336364	108336495
n-R5s173	ENSMUSG00000064554	5	107830338	107830456
Snord21	ENSMUSG00000064453	5	108333574	108333667
U6	ENSMUSG00000088429	5	107731965	107732066
Cplx1	ENSMUSG00000033615	5	108947573	108979043
Gm10086	ENSMUSG00000060730	5	108946182	108946589
Gak	ENSMUSG00000062234	5	108998430	109058758
Tmem175	ENSMUSG00000013495	5	109058789	109076789
Dgkq	ENSMUSG00000004815	5	109075712	109098691
Idua	ENSMUSG00000033540	5	109089350	109113576
Slc26a1	ENSMUSG00000046959	5	109098897	109104588
Fgfrl1	ENSMUSG00000008090	5	109123248	109135969
Rnf212	ENSMUSG00000055385	5	109158481	109178467
Tmed11	ENSMUSG00000004821	5	109206254	109224382
Vmn2r8	ENSMUSG00000090961	5	109226212	109237773
Vmn2r9	ENSMUSG00000091624	5	109271966	109281529
Gm18594	ENSMUSG00000093756	5	109250740	109252142
RP24-465G18.2	ENSMUSG00000093479	5	109278800	109378274
Vmn2r-ps21	ENSMUSG00000093510	5	109301674	109321399
Vmn2r10	ENSMUSG00000067010	5	109422431	109435490
Gm18595	ENSMUSG00000093725	5	109401816	109404914
Gm5871	ENSMUSG00000093545	5	109445217	109445934
Vmn2r11	ENSMUSG00000091450	5	109475892	109488471
Vmn2r12	ENSMUSG00000090688	5	109514868	109526883
Vmn2r13	ENSMUSG00000091635	5	109585087	109621126
Vmn2r14	ENSMUSG00000091059	5	109644521	109653641
Gm8473	ENSMUSG00000093543	5	109665563	109667447
Vmn2r15	ENSMUSG00000091375	5	109715288	109726575
Vmn2r16	ENSMUSG00000092080	5	109759400	109793500
Gm7171	ENSMUSG00000093663	5	109825349	109831111
Vmn2r17	ENSMUSG00000091879	5	109849032	109882406
Crlf2	ENSMUSG00000033467	5	109983730	109988012
Gm8488	ENSMUSG00000093688	5	109956479	109958489
5430403G16Rik	ENSMUSG00000072763	5	110103564	110120060
4930522L14Rik	ENSMUSG00000072762	5	110165009	110180905
Gm8508	ENSMUSG00000049477	5	110186541	110186950
Gm15446	ENSMUSG00000090015	5	110352419	110372955
Gm16739	ENSMUSG00000085131	5	110351668	110352500
Zfp932	ENSMUSG00000066613	5	110425540	110439430
Gm17655	ENSMUSG00000090963	5	110475251	110475505
1010001B22Rik	ENSMUSG00000091434	5	110424530	110425417
Plcxd1	ENSMUSG00000064247	5	110528988	110534972
Gtpbp6	ENSMUSG00000033434	5	110532994	110537216
Zfp605	ENSMUSG00000023284	5	110539111	110560756
Chfr	ENSMUSG00000014668	5	110564859	110600991
Gm15484	ENSMUSG00000081865	5	110547041	110547868
Gm15787	ENSMUSG00000086247	5	110583419	110605523
Golga3	ENSMUSG00000029502	5	110605720	110655489
Ankle2	ENSMUSG00000029501	5	110660060	110685666
Pgam5	ENSMUSG00000029500	5	110688149	110698932
Pxmp2	ENSMUSG00000029499	5	110703301	110715205
Pole	ENSMUSG00000007080	5	110715325	110766493
P2rx2	ENSMUSG00000029503	5	110768831	110772168
Gm1679	ENSMUSG00000072754	5	110783115	110785106
Fbrsl1	ENSMUSG00000043323	5	110790773	110877522
Gm17724	ENSMUSG00000090661	5	110814854	110817092
Gm15788	ENSMUSG00000087439	5	110691180	110706286
Gm15791	ENSMUSG00000081256	5	110757223	110757541
Gm15792	ENSMUSG00000085606	5	110760225	110762222
Gm16728	ENSMUSG00000087494	5	110688182	110698866
SNORA70	ENSMUSG00000087722	5	110757051	110757202
A630023P12Rik	ENSMUSG00000048215	5	110943942	110954999
Galnt9	ENSMUSG00000033316	5	110973364	111050401
Noc4l	ENSMUSG00000033294	5	111077437	111082436
Ddx51	ENSMUSG00000029504	5	111082470	111089515
Ep400	ENSMUSG00000029505	5	111093392	111199736
U6	ENSMUSG00000065775	5	111106143	111106249
SNORA49	ENSMUSG00000077254	5	111121068	111121200
Pus1	ENSMUSG00000029507	5	111202686	111209678
Ulk1	ENSMUSG00000029512	5	111213507	111239116
Hscb	ENSMUSG00000043510	5	111258089	111268796
Chek2	ENSMUSG00000029521	5	111269036	111303152
Gm15559	ENSMUSG00000086401	5	111199968	111208279
Ttc28	ENSMUSG00000033209	5	111308822	111718800
Gm15989	ENSMUSG00000081104	5	111334263	111334760
Gm15988	ENSMUSG00000083771	5	111437499	111437865
Gm17598	ENSMUSG00000091066	5	111208901	111210146
U6	ENSMUSG00000065071	5	111186104	111186210
Mir701	ENSMUSG00000076163	5	111433163	111433271
Pitpnb	ENSMUSG00000050017	5	111759783	111817379
Mn1	ENSMUSG00000070576	5	111846382	111886053
C130026L21Rik	ENSMUSG00000052848	5	112010442	112016965
E130006D01Rik	ENSMUSG00000085271	5	112163304	112190745
Gm16019	ENSMUSG00000085919	5	112171869	112177196
Miat	ENSMUSG00000086878	5	112642248	112657968
Cryba4	ENSMUSG00000066975	5	112675513	112681538
Crybb1	ENSMUSG00000029343	5	112684835	112698605
Tpst2	ENSMUSG00000029344	5	112705711	112744381
Tfip11	ENSMUSG00000029345	5	112755378	112767093
Srrd	ENSMUSG00000029346	5	112766412	112772060
Hps4	ENSMUSG00000042328	5	112772103	112807434
Gm6583	ENSMUSG00000051503	5	112782821	112785053
Asphd2	ENSMUSG00000029348	5	112814468	112821233
Sez6l	ENSMUSG00000058153	5	112848180	113006205
RP23-459I1.1	ENSMUSG00000093637	5	112803389	112806659
Gm6588	ENSMUSG00000072722	5	112878446	112880758
Myo18b	ENSMUSG00000072720	5	113117896	113325382
Adrbk2	ENSMUSG00000042249	5	113339498	113444811
Crybb2	ENSMUSG00000042240	5	113487278	113499137
Crybb3	ENSMUSG00000029352	5	113504859	113510604
2900026A02Rik	ENSMUSG00000051339	5	113515343	113592371
U6	ENSMUSG00000065373	5	113473164	113473272
Tmem211	ENSMUSG00000066964	5	113655929	113668283
Sgsm1	ENSMUSG00000042216	5	113672240	113739806
Aym1	ENSMUSG00000053873	5	113786314	113786841
AC151577.1	ENSMUSG00000093343	5	113690296	113690368
Wscd2	ENSMUSG00000063430	5	113919467	114039679
Wscd2	ENSMUSG00000085571	5	113919772	113919960
Cmklr1	ENSMUSG00000042190	5	114062363	114100435
1700069L16Rik	ENSMUSG00000042184	5	114142431	114174781
Ficd	ENSMUSG00000053334	5	114185791	114190609
Sart3	ENSMUSG00000018974	5	114192455	114221658
Gm3511	ENSMUSG00000069196	5	114217108	114217421
Iscu	ENSMUSG00000025825	5	114222757	114228297
Tmem119	ENSMUSG00000054675	5	114243738	114250525
Selplg	ENSMUSG00000048163	5	114267807	114280510
Coro1c	ENSMUSG00000004530	5	114292445	114358767
Ssh1	ENSMUSG00000042121	5	114387103	114443903
Dao	ENSMUSG00000042096	5	114453712	114475458
Svop	ENSMUSG00000042078	5	114476919	114541579
Usp30	ENSMUSG00000029592	5	114550342	114573515
Alkbh2	ENSMUSG00000044339	5	114573935	114578227
Ung	ENSMUSG00000029591	5	114580395	114589332
Acacb	ENSMUSG00000042010	5	114596544	114700770
Foxn4	ENSMUSG00000042002	5	114704173	114723816
Myo1h	ENSMUSG00000066952	5	114764950	114814585
Kctd10	ENSMUSG00000001098	5	114813576	114830524
Ube3b	ENSMUSG00000029577	5	114830637	114871177
Mmab	ENSMUSG00000029575	5	114881043	114894068
Mvk	ENSMUSG00000041939	5	114894278	114910600
BC057022	ENSMUSG00000041930	5	115018025	115063229
Trpv4	ENSMUSG00000014158	5	115072161	115108430
Gltp	ENSMUSG00000011884	5	115119412	115140993
Tchp	ENSMUSG00000002486	5	115157769	115172336
Git2	ENSMUSG00000041890	5	115177416	115225526
Ankrd13a	ENSMUSG00000041870	5	115224686	115256209
1500011B03Rik	ENSMUSG00000072694	5	115258205	115263985
Gm20499	ENSMUSG00000092252	5	115259045	115273469
1500011B03Rik	ENSMUSG00000092279	5	115262802	115263954
2610524H06Rik	ENSMUSG00000092486	5	115271944	115273477
Gm13821	ENSMUSG00000078186	5	115292358	115292871
4930519G04Rik	ENSMUSG00000029564	5	115303673	115333668
Gm9936	ENSMUSG00000054123	5	115305767	115308691
Oasl2	ENSMUSG00000029561	5	115346943	115362243
Oasl1	ENSMUSG00000041827	5	115373249	115387924
2210016L21Rik	ENSMUSG00000029559	5	115392167	115399792
Hnf1a	ENSMUSG00000029556	5	115398370	115421076
Sppl3	ENSMUSG00000029550	5	115461146	115548799
Gm10401	ENSMUSG00000072693	5	115547698	115548304
Acads	ENSMUSG00000029545	5	115560308	115569355
Unc119b	ENSMUSG00000046562	5	115572559	115584984
Mlec	ENSMUSG00000048578	5	115592990	115608188
Cabp1	ENSMUSG00000029544	5	115618698	115644390
Gm15736	ENSMUSG00000085713	5	114094972	114095691
Gm17122	ENSMUSG00000090458	5	114292610	114293125
Gm16108	ENSMUSG00000089734	5	114515470	114539475
Gm13784	ENSMUSG00000084243	5	114687185	114687934
Gm13789	ENSMUSG00000085590	5	114813424	114815366
Gm13790	ENSMUSG00000086302	5	115001298	115004025
4930515G01Rik	ENSMUSG00000092183	5	115223746	115224992
Gm13820	ENSMUSG00000078187	5	115266974	115267111
Gm13819	ENSMUSG00000082052	5	115278582	115279224
Gm13823	ENSMUSG00000080707	5	115317690	115318034
Gm13822	ENSMUSG00000087477	5	115367327	115373286
Gm13824	ENSMUSG00000086054	5	115418793	115448055
Gm13825	ENSMUSG00000086140	5	115418832	115421409
Gm13827	ENSMUSG00000086167	5	115503430	115503855
Gm13826	ENSMUSG00000072692	5	115552931	115560277
Gm13828	ENSMUSG00000083182	5	115648352	115648714
U6	ENSMUSG00000065320	5	114378733	114378813
9530026P05Rik	ENSMUSG00000087573	6	92890363	93222883
4930590J08Rik	ENSMUSG00000034063	6	91864753	91900634
Fgd5	ENSMUSG00000034037	6	91928872	92025998
C130022K22Rik	ENSMUSG00000034083	6	91828047	91849842
4930466I24Rik	ENSMUSG00000087317	6	91962388	91966111
Nr2c2	ENSMUSG00000005893	6	92041384	92123051
Mrps25	ENSMUSG00000014551	6	92119519	92134027
Zfyve20	ENSMUSG00000014550	6	92136706	92164919
Trh	ENSMUSG00000005892	6	92192055	92194644
Prickle2	ENSMUSG00000030020	6	92320886	92656139
Adamts9	ENSMUSG00000030022	6	92722693	92893486
A730049H05Rik	ENSMUSG00000048636	6	92766472	92797168
Gm15737	ENSMUSG00000079462	6	92819351	92834405
Magi1	ENSMUSG00000045095	6	93625449	94233316
SNORA17	ENSMUSG00000077180	6	93285452	93285582
SNORA17	ENSMUSG00000088630	6	93459567	93459696
U6	ENSMUSG00000088627	6	93743766	93743871
Zfp84	ENSMUSG00000046185	7	30553571	30564840
Capn12	ENSMUSG00000054083	7	29666675	29678604
Dll3	ENSMUSG00000003436	7	29076673	29087257
BC089491	ENSMUSG00000046750	7	29069671	29076205
Gm17248	ENSMUSG00000090904	7	28712743	28716022
Actn4	ENSMUSG00000054808	7	29678267	29747359
Eif3k	ENSMUSG00000053565	7	29756392	29766883
Map4k1	ENSMUSG00000037337	7	29767073	29788298
Ryr1	ENSMUSG00000030592	7	29788359	29910170
Timm50	ENSMUSG00000003438	7	29090535	29097091
Supt5h	ENSMUSG00000003435	7	29099917	29123738
Ech1	ENSMUSG00000053898	7	29610236	29617266
Lgals4	ENSMUSG00000053964	7	29618813	29626722
Catsperg1	ENSMUSG00000049676	7	29966340	29999054
Rasgrp4	ENSMUSG00000030589	7	29919873	29938980
Fam98c	ENSMUSG00000030590	7	29937530	29941253
Spred3	ENSMUSG00000037239	7	29943848	29954860
Ggn	ENSMUSG00000031493	7	29955239	29958952
Psmd8	ENSMUSG00000030591	7	29959207	29965692
Rps16	ENSMUSG00000037563	7	29135671	29137715
Plekhg2	ENSMUSG00000037552	7	29144623	29157681
Zfp59	ENSMUSG00000078779	7	28627874	28641995
Zfp607	ENSMUSG00000020420	7	28647576	28664586
1700049G17Rik	ENSMUSG00000070709	7	28692411	28714479
Zfp780b	ENSMUSG00000063047	7	28747727	28759804
Zfp850	ENSMUSG00000074608	7	28769875	28770815
Psmc4	ENSMUSG00000030603	7	28826726	28835120
Fcgbp	ENSMUSG00000047730	7	28856255	28905881
Gm10935	ENSMUSG00000078384	7	28884679	28887506
Kcnk6	ENSMUSG00000046410	7	30006947	30017541
Yif1b	ENSMUSG00000030588	7	30023348	30032612
2200002D01Rik	ENSMUSG00000030587	7	30031580	30033451
Spint2	ENSMUSG00000074227	7	30041350	30066996
Ppp1r14a	ENSMUSG00000037166	7	30074339	30078409
Dpf1	ENSMUSG00000030584	7	30088970	30102607
Sipa1l3	ENSMUSG00000030583	7	30105397	30290479
4932431P20Rik	ENSMUSG00000074224	7	30304224	30323076
4930432E11Rik	ENSMUSG00000046958	7	30345534	30360497
6330444E15Rik	ENSMUSG00000051976	7	30363894	30364853
Catsperg2	ENSMUSG00000049123	7	30482238	30512051
Zfp36	ENSMUSG00000044786	7	29161803	29164274
Med29	ENSMUSG00000003444	7	29171165	29177727
Paf1	ENSMUSG00000003437	7	29177970	29184407
Samd4b	ENSMUSG00000037513	7	29184568	29208857
Gmfg	ENSMUSG00000060791	7	29222466	29233252
Lrfn1	ENSMUSG00000030600	7	29237257	29252567
Il28a	ENSMUSG00000059128	7	29293855	29295474
Il28b	ENSMUSG00000060747	7	29307760	29309366
Sycn	ENSMUSG00000084174	7	29325904	29327229
Nccrp1	ENSMUSG00000047586	7	29328615	29332273
Pak4	ENSMUSG00000030602	7	29343838	29383204
C330005M16Rik	ENSMUSG00000037469	7	29392653	29416351
Fbxo27	ENSMUSG00000037463	7	29477868	29484357
Fbxo17	ENSMUSG00000030598	7	29501823	29523163
Mrps12	ENSMUSG00000045948	7	29524660	29526839
Sars2	ENSMUSG00000070699	7	29527010	29538871
Nfkbib	ENSMUSG00000030595	7	29543270	29552531
Lgals7	ENSMUSG00000053522	7	29648872	29651303
Gm10651	ENSMUSG00000074243	7	28734174	28734782
Gm16282	ENSMUSG00000090009	7	29923459	29925331
1110035H17Rik	ENSMUSG00000050633	7	29940699	29941937
Gm17113	ENSMUSG00000061115	7	29968055	29968402
Sirt2	ENSMUSG00000015149	7	29551754	29573684
Gm16799	ENSMUSG00000087096	7	29856622	29866153
Rinl	ENSMUSG00000051735	7	29573988	29583982
Hnrnpl	ENSMUSG00000015165	7	29593560	29607285
9530053A07Rik	ENSMUSG00000078776	7	28914485	28949830
Fbl	ENSMUSG00000046865	7	28954765	28964288
Dyrk1b	ENSMUSG00000002409	7	28964488	28972313
Eid2	ENSMUSG00000046058	7	29052900	29054184
Eid2b	ENSMUSG00000070705	7	29062725	29065148
Zfp30	ENSMUSG00000047473	7	30569017	30579721
Zfp790	ENSMUSG00000011427	7	30601091	30617061
SNORA40	ENSMUSG00000077711	7	29136527	29136651
Mir1963	ENSMUSG00000089219	7	29868655	29868713
U6	ENSMUSG00000065659	7	30522337	30522443
U6	ENSMUSG00000064793	7	28908273	28908378
Mir1964	ENSMUSG00000089139	7	30558313	30558395
n-R5s153	ENSMUSG00000065385	7	30442180	30442295
Gm17199	ENSMUSG00000090331	7	30640659	30641074
Gm17551	ENSMUSG00000092015	7	30638104	30644044
Zfp940	ENSMUSG00000050855	7	30618639	30638688
Zfp420	ENSMUSG00000058402	7	30644998	30700678
Zfp27	ENSMUSG00000062040	7	30678352	30691591
Zfp74	ENSMUSG00000059975	7	30715834	30739108
Gm10169	ENSMUSG00000083669	7	30750237	30750584
C230062I16Rik	ENSMUSG00000063623	7	30738640	30741011
Zfp568	ENSMUSG00000074221	7	30768974	30813301
Zfp14	ENSMUSG00000053985	7	30823072	30829753
Gm10989	ENSMUSG00000078770	7	30839755	30840586
Zfp82	ENSMUSG00000058447	7	30841057	30857842
Zfp566	ENSMUSG00000078768	7	30862356	30875529
Gm10988	ENSMUSG00000078767	7	30936893	30937764
Gm17440	ENSMUSG00000092079	7	30983649	30985908
Zfp260	ENSMUSG00000049421	7	30879796	30892641
Zfp382	ENSMUSG00000074220	7	30906961	30919684
Zfp146	ENSMUSG00000037029	7	30946293	30954746
Gm5113	ENSMUSG00000066647	7	30954894	30965228
Cox7a1	ENSMUSG00000074218	7	30969190	30971047
Capns1	ENSMUSG00000001794	7	30971961	30980183
Tbcb	ENSMUSG00000006095	7	31009150	31017291
Polr2i	ENSMUSG00000019738	7	31016967	31018409
Ovol3	ENSMUSG00000056028	7	31018512	31020744
Wdr62	ENSMUSG00000037020	7	31025157	31065438
AC164703.1	ENSMUSG00000093495	7	30885859	30885954
Rps12-ps5	ENSMUSG00000081565	7	31048282	31048670
Thap8	ENSMUSG00000013928	7	31065113	31075256
Clip3	ENSMUSG00000013921	7	31076691	31093386
Alkbh6	ENSMUSG00000042831	7	31093736	31099323
AI428936	ENSMUSG00000019737	7	31099826	31104065
Sdhaf1	ENSMUSG00000074211	7	31106430	31107394
E130208F15Rik	ENSMUSG00000074210	7	31106759	31108491
AC149067.1	ENSMUSG00000093571	7	31096544	31096914
Tnks	ENSMUSG00000031529	8	35892233	36028744
Gm17578	ENSMUSG00000092129	8	34923675	34943566
Gm17702	ENSMUSG00000091853	8	35157602	35159203
Mboat4	ENSMUSG00000071113	8	35178084	35188239
Leprotl1	ENSMUSG00000031513	8	35198626	35210087
Tmem66	ENSMUSG00000031532	8	35217617	35233899
Gm4889	ENSMUSG00000056797	8	35390964	35391407
Dusp4	ENSMUSG00000031530	8	35870351	35882948
Purg	ENSMUSG00000049184	8	34496797	34527940
5930422O12Rik	ENSMUSG00000048544	8	34539181	34540020
Tex15	ENSMUSG00000009628	8	34627210	34696054
Ppp2cb	ENSMUSG00000009630	8	34710093	34730266
Ubxn8	ENSMUSG00000052906	8	34730058	34752448
Gsr	ENSMUSG00000031584	8	34762995	34808635
1700104B16Rik	ENSMUSG00000049476	8	34841021	34842286
Gtf2e2	ENSMUSG00000031585	8	34842386	34887645
Rbpms	ENSMUSG00000031586	8	34893116	35040313
Dctn6	ENSMUSG00000031516	8	35153474	35171850
Gm9951	ENSMUSG00000054618	8	35112316	35120100
Gm10131	ENSMUSG00000063412	8	35174442	35174756
Gm9939	ENSMUSG00000054247	8	36028106	36029263
Ppp1r3b	ENSMUSG00000046794	8	36438795	36451178
AC134443.1	ENSMUSG00000080434	8	35358910	35359030
SNORA48	ENSMUSG00000088856	8	34802273	34802416
AC123616.1	ENSMUSG00000092649	8	35004156	35004412
Eri1	ENSMUSG00000031527	8	36528319	36558587
Mfhas1	ENSMUSG00000070056	8	36650852	36742503
Gm16793	ENSMUSG00000087118	8	36645626	36652026
Cldn23	ENSMUSG00000055976	8	36887766	36889613
5S_rRNA	ENSMUSG00000088182	8	36810503	36810616
Aga	ENSMUSG00000031521	8	54597080	54608776
Neil3	ENSMUSG00000039396	8	54672221	54724419
Vegfc	ENSMUSG00000031520	8	55162886	55271808
U7	ENSMUSG00000089068	8	54579207	54579268
SNORA17	ENSMUSG00000088678	8	54091762	54091877
Asb5	ENSMUSG00000031519	8	55635684	55673189
Spata4	ENSMUSG00000031518	8	55686134	55695451
Wdr17	ENSMUSG00000039375	8	55714408	55972537
Spcs3	ENSMUSG00000054408	8	55605787	55615351
5330439A09Rik	ENSMUSG00000089708	8	55653903	55686340
Gm15758	ENSMUSG00000089719	8	55794340	55795734
n-R5s98	ENSMUSG00000084498	8	55951614	55951732
Gpm6a	ENSMUSG00000031517	8	56040081	56146231
Cbln1	ENSMUSG00000031654	8	89992761	89996508
Cbln1	ENSMUSG00000090275	8	89992768	89994967
4933402J07Rik	ENSMUSG00000069971	8	90087752	90113323
Zfp423	ENSMUSG00000045333	8	90185709	90483494
Tmem188	ENSMUSG00000036810	8	90642668	90659009
Heatr3	ENSMUSG00000031657	8	90661754	90695926
9430002A10Rik	ENSMUSG00000062704	8	90698459	90698927
Papd5	ENSMUSG00000036779	8	90723112	90783621
Adcy7	ENSMUSG00000031659	8	90796302	90853861
Brd7	ENSMUSG00000031660	8	90854938	90886093
Nkd1	ENSMUSG00000031661	8	91045243	91118786
Snx20	ENSMUSG00000031662	8	91150727	91160027
Nod2	ENSMUSG00000055994	8	91171214	91212373
Cyld	ENSMUSG00000036712	8	91220927	91275844
Rps6-ps2	ENSMUSG00000056772	8	91330290	91331039
Sall1	ENSMUSG00000031665	8	91551147	91568061
Gm5356	ENSMUSG00000069962	8	91710842	91711459
Gm2716	ENSMUSG00000086208	8	90568797	90642506
C230036H16Rik	ENSMUSG00000091862	8	89997056	90027871
Gm2694	ENSMUSG00000087391	8	89996711	90049453
Gm9988	ENSMUSG00000055968	8	90661978	90662416
7SK	ENSMUSG00000089301	8	90160556	90160912
Gm10698	ENSMUSG00000079884	9	33535831	33536436
Arhgap32	ENSMUSG00000041444	9	31923721	32076031
Kcnj5	ENSMUSG00000032034	9	32122368	32151822
Kcnj1	ENSMUSG00000041248	9	32180003	32206777
Fli1	ENSMUSG00000016087	9	32229793	32348974
Ets1	ENSMUSG00000032035	9	32443806	32565405
U6	ENSMUSG00000064492	9	32254407	32254513
SNORA17	ENSMUSG00000088905	9	33725077	33725207
Tpt1-ps5	ENSMUSG00000059252	9	37504100	37504618
Olfr892-ps1	ENSMUSG00000058521	9	37997312	37998237
Olfr908	ENSMUSG00000063732	9	38323619	38324550
Olfr151	ENSMUSG00000061165	9	37518857	37538646
Olfr874	ENSMUSG00000063350	9	37553721	37554727
Olfr875	ENSMUSG00000058628	9	37580222	37581225
Olfr876	ENSMUSG00000066750	9	37611474	37612521
Olfr877	ENSMUSG00000066749	9	37662405	37663340
Olfr145	ENSMUSG00000066748	9	37704910	37705960
Olfr878	ENSMUSG00000066747	9	37726133	37727197
Olfr881	ENSMUSG00000060583	9	37800077	37801024
Olfr883	ENSMUSG00000062841	9	37833393	37834322
Olfr884	ENSMUSG00000058130	9	37854809	37855895
Olfr885	ENSMUSG00000057029	9	37868907	37869836
Olfr887	ENSMUSG00000059942	9	37892423	37893352
Olfr888	ENSMUSG00000059275	9	37916273	37917217
Olfr889	ENSMUSG00000062211	9	37923277	37924312
Olfr890	ENSMUSG00000061096	9	37950722	37951666
Olfr891	ENSMUSG00000045528	9	37987456	37988406
Olfr893	ENSMUSG00000070312	9	38016637	38017578
Olfr894	ENSMUSG00000070311	9	38026403	38027351
Olfr143	ENSMUSG00000070310	9	38061004	38061945
Olfr895	ENSMUSG00000070309	9	38076100	38077050
Olfr25	ENSMUSG00000058270	9	38137077	38138144
Olfr898	ENSMUSG00000060101	9	38156670	38157620
Olfr250	ENSMUSG00000049864	9	38175133	38176128
Olfr251	ENSMUSG00000062388	9	38185468	38186418
Olfr147	ENSMUSG00000049098	9	38209305	38211414
Olfr901	ENSMUSG00000052058	9	38237869	38238804
Olfr902	ENSMUSG00000049334	9	38256377	38257432
Olfr904	ENSMUSG00000051620	9	38271628	38272560
Olfr905	ENSMUSG00000046455	9	38280334	38281266
Olfr906	ENSMUSG00000039962	9	38295616	38296551
Olfr907	ENSMUSG00000045066	9	38306256	38307188
Olfr911-ps1	ENSMUSG00000062621	9	38331315	38332254
Olfr910	ENSMUSG00000057444	9	38345467	38347414
Olfr912	ENSMUSG00000060114	9	38387829	38389796
Olfr913	ENSMUSG00000059189	9	38400388	38402746
Olfr914	ENSMUSG00000047050	9	38414052	38415002
Olfr916	ENSMUSG00000064113	9	38465043	38465975
Olfr917	ENSMUSG00000063225	9	38472498	38473427
Olfr918	ENSMUSG00000046150	9	38480089	38481066
Olfr919	ENSMUSG00000056961	9	38505014	38505961
Vwa5a	ENSMUSG00000023186	9	38525853	38550922
Olfr920	ENSMUSG00000061039	9	38560381	38564448
Olfr921	ENSMUSG00000049926	9	38580673	38583939
Olfr922	ENSMUSG00000043911	9	38622993	38624124
Olfr923	ENSMUSG00000044798	9	38635200	38636267
Olfr924	ENSMUSG00000062103	9	38655701	38656627
Olfr26	ENSMUSG00000047667	9	38662645	38663575
Olfr926	ENSMUSG00000064333	9	38684711	38685761
Olfr930	ENSMUSG00000063221	9	38737676	38738774
Olfr933	ENSMUSG00000058515	9	38783236	38784238
Olfr934	ENSMUSG00000057424	9	38789695	38790627
Olfr935	ENSMUSG00000059595	9	38802092	38803018
Olfr146	ENSMUSG00000058820	9	38826144	38827204
Olfr937	ENSMUSG00000047724	9	38867314	38868249
Olfr938	ENSMUSG00000048501	9	38885283	38886401
Olfr27	ENSMUSG00000049708	9	38935752	38952657
Olfr943	ENSMUSG00000062149	9	38991765	38992709
Olfr944	ENSMUSG00000060905	9	39024944	39025879
Olfr1537-ps1	ENSMUSG00000063670	9	39045072	39046016
Olfr945	ENSMUSG00000063380	9	39065305	39066267
Olfr948	ENSMUSG00000057349	9	39126232	39127197
Olfr951	ENSMUSG00000060129	9	39201378	39202322
Olfr952	ENSMUSG00000058856	9	39233678	39234733
Olfr954	ENSMUSG00000064173	9	39269018	39269962
Olfr955	ENSMUSG00000063176	9	39277365	39278309
Olfr44	ENSMUSG00000062649	9	39291789	39301573
Olfr957	ENSMUSG00000042949	9	39318368	39319303
Olfr958	ENSMUSG00000050853	9	39357513	39358454
Olfr959	ENSMUSG00000059366	9	39379845	39380899
AW551984	ENSMUSG00000038112	9	39394981	39411988
Olfr148	ENSMUSG00000048299	9	39421129	39422145
Olfr960	ENSMUSG00000059867	9	39430690	39431756
Olfr961	ENSMUSG00000059106	9	39454309	39455257
Olfr963	ENSMUSG00000064110	9	39476644	39477579
SNORA17	ENSMUSG00000077240	9	38318758	38318881
U2	ENSMUSG00000065620	9	37630171	37630369
CT025680.1	ENSMUSG00000078003	9	38856143	38856234
SNORA17	ENSMUSG00000077427	9	39345411	39345537
SNORD19	ENSMUSG00000088866	9	39406713	39406772
AC073947.1	ENSMUSG00000093152	9	38882996	38883079
Olfr964-ps1	ENSMUSG00000044107	9	39493629	39494527
Olfr149	ENSMUSG00000062121	9	39509378	39510407
Olfr965	ENSMUSG00000055636	9	39526814	39527752
Olfr150	ENSMUSG00000058652	9	39544402	39545340
Olfr967	ENSMUSG00000055820	9	39557973	39558905
Olfr968	ENSMUSG00000058532	9	39579439	39580383
Olfr969	ENSMUSG00000063359	9	39602962	39603897
Olfr970	ENSMUSG00000063657	9	39627226	39628161
Olfr971	ENSMUSG00000061686	9	39647021	39647944
Olfr972	ENSMUSG00000058827	9	39680862	39681806
Olfr229	ENSMUSG00000060107	9	39717390	39718313
Olfr974	ENSMUSG00000051493	9	39749800	39750879
Olfr975	ENSMUSG00000043331	9	39757422	39758354
Olfr976	ENSMUSG00000047352	9	39762343	39764554
Olfr978	ENSMUSG00000044292	9	39801397	39802332
Olfr979	ENSMUSG00000059473	9	39807791	39808835
Olfr980	ENSMUSG00000060254	9	39813528	39814532
Olfr981	ENSMUSG00000046678	9	39829937	39830933
1700001J11Rik	ENSMUSG00000066639	9	39858208	39860496
Olfr982	ENSMUSG00000049010	9	39881882	39882847
Olfr983	ENSMUSG00000044205	9	39899602	39901143
Olfr984	ENSMUSG00000045812	9	39908129	39909073
Olfr985	ENSMUSG00000049073	9	39934509	39935624
Tmem225	ENSMUSG00000040541	9	39955707	39958465
Gm4893	ENSMUSG00000070308	9	39972215	39972544
Olfr986	ENSMUSG00000051095	9	39994664	39995679
Zfp202	ENSMUSG00000025602	9	39999901	40021189
AC136021.1	ENSMUSG00000093182	9	40010934	40011250
Scn3b	ENSMUSG00000049281	9	40076801	40099203
2810417H13Rik	ENSMUSG00000040204	9	65738044	65751073
Csnk1g1	ENSMUSG00000032384	9	65756781	65892816
Ppib	ENSMUSG00000032383	9	65907976	65914436
Snx22	ENSMUSG00000039452	9	65912983	65917538
Snx1	ENSMUSG00000032382	9	65935940	65974394
Fam96a	ENSMUSG00000032381	9	65974418	65986762
Dapk2	ENSMUSG00000032380	9	66006030	66120049
Herc1	ENSMUSG00000038664	9	66198257	66356582
Fbxl22	ENSMUSG00000050503	9	66356266	66362400
Usp3	ENSMUSG00000032376	9	66362444	66440949
Gm16218	ENSMUSG00000059571	9	65145339	65145726
Kbtbd13	ENSMUSG00000054978	9	65237944	65239459
Oaz2	ENSMUSG00000040652	9	65515808	65538107
Gm16073	ENSMUSG00000079915	9	65685974	65686490
Gm15563	ENSMUSG00000086387	9	66419808	66429866
Plekho2	ENSMUSG00000050721	9	65402193	65427847
Ptplad1	ENSMUSG00000033629	9	64834792	64869524
Clpx	ENSMUSG00000015357	9	65142067	65178465
Pdcd7	ENSMUSG00000041837	9	65193875	65207450
Gm514	ENSMUSG00000086228	9	65208867	65228184
Rasl12	ENSMUSG00000041696	9	65246295	65262660
Ostb	ENSMUSG00000053862	9	65260560	65270580
Mtfmt	ENSMUSG00000059183	9	65283589	65300861
Spg21	ENSMUSG00000032388	9	65308744	65336277
Ankdd1a	ENSMUSG00000066510	9	65349260	65364806
Rab11a	ENSMUSG00000004771	9	64563106	64585565
2010321M09Rik	ENSMUSG00000034263	9	64808639	64834781
Parp16	ENSMUSG00000032392	9	65062497	65087026
Cilp	ENSMUSG00000042254	9	65112987	65128413
Rbpms2	ENSMUSG00000032387	9	65477455	65508335
Zfp609	ENSMUSG00000040524	9	65539391	65675371
Trip4	ENSMUSG00000032386	9	65678943	65756601
Igdcc3	ENSMUSG00000032394	9	64988961	65033664
Dennd4a	ENSMUSG00000053641	9	64659147	64767474
Dpp8	ENSMUSG00000032393	9	64880265	64930457
Igdcc4	ENSMUSG00000032816	9	64949293	64985747
Slc24a1	ENSMUSG00000034452	9	64770668	64799414
Pif1	ENSMUSG00000041064	9	65434967	65443774
Megf11	ENSMUSG00000036466	9	64233433	64557012
SNORA17	ENSMUSG00000077385	9	65800121	65800252
AC110235.1	ENSMUSG00000093316	9	65181085	65181318
U5	ENSMUSG00000075930	9	65049533	65049648
n-R5s85	ENSMUSG00000065387	9	65684160	65684272
U6	ENSMUSG00000065301	9	65748008	65748115
U5	ENSMUSG00000075763	9	65044379	65044494
AC122463.1	ENSMUSG00000093119	9	64819476	64819600
U6	ENSMUSG00000084437	9	66208448	66208549
AC161366.1	ENSMUSG00000089574	9	64989093	64989163
SNORA17	ENSMUSG00000089336	9	64729591	64729732
Car12	ENSMUSG00000032373	9	66561493	66614652
Aph1b	ENSMUSG00000032375	9	66623009	66643297
Gm10647	ENSMUSG00000074232	9	66644846	66646881
BC050972	ENSMUSG00000092131	9	66646485	66652166
Ppp1r2-ps4	ENSMUSG00000059237	9	66653113	66653745
Aph1c	ENSMUSG00000053040	9	66662801	66682533
Gm17098	ENSMUSG00000091745	9	66682506	66683341
Rab8b	ENSMUSG00000036943	9	66691479	66767512
Rps27l	ENSMUSG00000036781	9	66793893	66797323
Lactb	ENSMUSG00000032370	9	66803200	66823291
Tpm1	ENSMUSG00000032366	9	66870397	66897213
U6	ENSMUSG00000089450	9	66828895	66828992
U1	ENSMUSG00000088021	9	66952015	66952162
Tln2	ENSMUSG00000052698	9	67064894	67407510
Mir190	ENSMUSG00000076379	9	67084458	67084542
Mras	ENSMUSG00000032470	9	99285841	99337300
1600029I14Rik	ENSMUSG00000046242	9	99356662	99375369
Armc8	ENSMUSG00000032468	9	99378810	99469318
Dbr1	ENSMUSG00000032469	9	99476218	99484882
A4gnt	ENSMUSG00000037953	9	99512921	99522786
Dzip1l	ENSMUSG00000037784	9	99529915	99569675
Cldn18	ENSMUSG00000032473	9	99589880	99617686
Sox14	ENSMUSG00000053747	9	99774644	99776663
Il20rb	ENSMUSG00000044244	9	100358138	100387207
Nck1	ENSMUSG00000032475	9	100392712	100446472
Tmem22	ENSMUSG00000070287	9	100452612	100471504
Stag1	ENSMUSG00000037286	9	100498217	100858964
Pccb	ENSMUSG00000032527	9	100882451	100935317
Msl2	ENSMUSG00000066415	9	100978451	101007114
Ppp2r3a	ENSMUSG00000043154	9	101007322	101154162
Gm16004	ENSMUSG00000089655	9	99608818	99656462
Gm8661	ENSMUSG00000086225	9	100525393	100526384
SNORA17	ENSMUSG00000077215	9	99650810	99650936
SNORA24	ENSMUSG00000077393	9	101125282	101125408
SNORA17	ENSMUSG00000077495	9	99844128	99844261
SNORA17	ENSMUSG00000077245	9	101295309	101295440
Gm5161	ENSMUSG00000061486	9	101350827	101351684
Ephb1	ENSMUSG00000032537	9	101824458	102257023
9630041A04Rik	ENSMUSG00000057710	9	101840811	101845549
Gm17708	ENSMUSG00000091959	9	102248233	102257024
n-R5s88	ENSMUSG00000065107	9	102030218	102030335
U6	ENSMUSG00000088138	9	102275448	102275550
Acad11	ENSMUSG00000090150	9	103942992	104029976
Uba5	ENSMUSG00000032557	9	103948929	103965464
Ccrl1	ENSMUSG00000041748	9	103986487	104004890
Ccrl1	ENSMUSG00000079355	9	104000468	104028973
Dnajc13	ENSMUSG00000032560	9	104053927	104165260
Acpp	ENSMUSG00000032561	9	104190581	104240058
Cpne4	ENSMUSG00000032564	9	104449616	104936874
Mrpl3	ENSMUSG00000032563	9	104955569	104979796
Nudt16	ENSMUSG00000032565	9	105031668	105034135
1700080E11Rik	ENSMUSG00000032566	9	105045674	105047412
Nek11	ENSMUSG00000035032	9	105064797	105297854
Aste1	ENSMUSG00000032567	9	105297722	105308088
Atp2c1	ENSMUSG00000032570	9	105305869	105429649
Pik3r4	ENSMUSG00000032571	9	105545325	105589985
Col6a6	ENSMUSG00000043719	9	105591747	105730415
Col6a5	ENSMUSG00000091345	9	105758400	105862974
Col6a4	ENSMUSG00000032572	9	105891785	105999114
RP24-553E23.2	ENSMUSG00000093590	9	105110526	105114193
Gm15619	ENSMUSG00000085430	9	105235843	105250710
Gm5621	ENSMUSG00000057626	9	105462448	105463092
SNORA17	ENSMUSG00000089116	9	104383698	104383840
U6	ENSMUSG00000084714	9	105904049	105904129
Mir2136	ENSMUSG00000089406	9	104328443	104328517
U4	ENSMUSG00000084659	9	105575795	105575881
AC117688.1	ENSMUSG00000088204	9	104897246	104897349
Glyctk	ENSMUSG00000020258	9	106055188	106060469
Wdr82	ENSMUSG00000020257	9	106073260	106094747
Ppm1m	ENSMUSG00000020253	9	106096503	106102077
Twf2	ENSMUSG00000023277	9	106105439	106117718
Tlr9	ENSMUSG00000045322	9	106124929	106129207
Alas1	ENSMUSG00000032786	9	106135786	106150457
D030055H07Rik	ENSMUSG00000086296	9	106051018	106062532
Poc1a	ENSMUSG00000023345	9	106183392	106252852
Dusp7	ENSMUSG00000053716	9	106270963	106278055
Rpl29	ENSMUSG00000048758	9	106331785	106333899
Acy1	ENSMUSG00000023262	9	106335327	106340567
Abhd14a	ENSMUSG00000042210	9	106342382	106350009
Abhd14b	ENSMUSG00000042073	9	106350971	106355246
Pcbp4	ENSMUSG00000023495	9	106356188	106366338
Gpr62	ENSMUSG00000091735	9	106366304	106368271
Parp3	ENSMUSG00000023249	9	106372653	106379280
Rrp9	ENSMUSG00000041506	9	106378294	106387755
4930500F10Rik	ENSMUSG00000091332	9	106150291	106151238
Mir135a-1	ENSMUSG00000065407	9	106056455	106056544
Mirlet7g	ENSMUSG00000065440	9	106081171	106081258
Iqcf1	ENSMUSG00000066383	9	106402298	106404581
Iqcf5	ENSMUSG00000066382	9	106416904	106418334
Iqcf3	ENSMUSG00000023577	9	106445720	106463956
Iqcf4	ENSMUSG00000041009	9	106470652	106473327
Iqcf6	ENSMUSG00000091129	9	106528913	106529943
Grm2	ENSMUSG00000023192	9	106546868	106558440
Tex264	ENSMUSG00000040813	9	106561078	106588279
Rad54l2	ENSMUSG00000040661	9	106590413	106691544
7SK	ENSMUSG00000088317	9	106538649	106538914
Znrf3	ENSMUSG00000041961	11	5176327	5344850
Xbp1	ENSMUSG00000020484	11	5420662	5425896
Ccdc117	ENSMUSG00000020482	11	5428890	5442190
Ankrd36	ENSMUSG00000020481	11	5469687	5589340
Mrps24	ENSMUSG00000020477	11	5603986	5615683
Urgcp	ENSMUSG00000049680	11	5613420	5662379
Dbnl	ENSMUSG00000020476	11	5688491	5700965
Pgam2	ENSMUSG00000020475	11	5701643	5703736
Polm	ENSMUSG00000020474	11	5727863	5738019
Aebp1	ENSMUSG00000020473	11	5761950	5772091
Pold2	ENSMUSG00000020471	11	5772183	5778295
Myl7	ENSMUSG00000020469	11	5796640	5798785
Gck	ENSMUSG00000041798	11	5800823	5850084
Ykt6	ENSMUSG00000002741	11	5855696	5867783
Camk2b	ENSMUSG00000057897	11	5869647	5966365
Nudcd3	ENSMUSG00000053838	11	6005694	6100418
Npc1l1	ENSMUSG00000020447	11	6111016	6130146
Ddx56	ENSMUSG00000004393	11	6158922	6167775
Tmed4	ENSMUSG00000004394	11	6170372	6174873
Ogdh	ENSMUSG00000020456	11	6191636	6256645
Zmiz2	ENSMUSG00000041164	11	6289077	6306165
Ppia	ENSMUSG00000071866	11	6315446	6319820
H2afv	ENSMUSG00000041126	11	6327229	6344446
Purb	ENSMUSG00000091207	11	6374795	6375920
Purb	ENSMUSG00000049647	11	6367609	6369141
Myo1g	ENSMUSG00000020437	11	6406551	6420968
Ccm2	ENSMUSG00000000378	11	6446890	6496747
Nacad	ENSMUSG00000041073	11	6497826	6506056
Tbrg4	ENSMUSG00000000384	11	6515601	6526070
Wap	ENSMUSG00000000381	11	6531490	6538652
Ramp3	ENSMUSG00000041046	11	6558524	6577478
Adcy1	ENSMUSG00000020431	11	6963492	7078509
Igfbp1	ENSMUSG00000020429	11	7097785	7102549
Igfbp3	ENSMUSG00000020427	11	7106089	7113926
Gm11962	ENSMUSG00000085232	11	5395195	5395449
Gm11963	ENSMUSG00000085189	11	5398843	5405702
Gm11964	ENSMUSG00000081021	11	5534142	5534585
Gm11965	ENSMUSG00000081691	11	5578359	5578635
2210015D19Rik	ENSMUSG00000083844	11	5662132	5684713
Gm11966	ENSMUSG00000080904	11	5718500	5718586
Gm11967	ENSMUSG00000084819	11	5815318	5816734
Rps15a-ps6	ENSMUSG00000083022	11	6072647	6073039
Gm11969	ENSMUSG00000083209	11	6082682	6083037
Gm11402	ENSMUSG00000082640	11	6140212	6140520
Gm11401	ENSMUSG00000081153	11	6142381	6142724
Gm11970	ENSMUSG00000079988	11	6346221	6346540
Gm11971	ENSMUSG00000083693	11	6353154	6353441
Gm11972	ENSMUSG00000084280	11	6355520	6355908
Gm11973	ENSMUSG00000086839	11	6375428	6393538
Gm11974	ENSMUSG00000085156	11	6425594	6428763
Gm11975	ENSMUSG00000084231	11	6459026	6459506
Gm11978	ENSMUSG00000086373	11	6550151	6560236
Gm11980	ENSMUSG00000083075	11	6585827	6586812
Gm11981	ENSMUSG00000086808	11	6616004	6620040
Gm11976	ENSMUSG00000080833	11	6618921	6619498
Gm11977	ENSMUSG00000083819	11	6681681	6683141
Gm11979	ENSMUSG00000082579	11	6685841	6686583
Gm11982	ENSMUSG00000082897	11	6725499	6725812
Gm11983	ENSMUSG00000081213	11	6735629	6737657
Gm11984	ENSMUSG00000082333	11	6761542	6762307
Gm11985	ENSMUSG00000087512	11	7083156	7086293
AL646020.1	ENSMUSG00000092885	11	6372228	6372280
SNORA5	ENSMUSG00000064495	11	6519811	6519943
SNORA9	ENSMUSG00000064513	11	6428036	6428168
SNORA17	ENSMUSG00000077304	11	5460609	5460738
SNORA70	ENSMUSG00000088688	11	6446150	6446238
n-R5s67	ENSMUSG00000077524	11	6173314	6173427
Snora5c	ENSMUSG00000065686	11	6520322	6520457
Gm11986	ENSMUSG00000087637	11	7170354	7190377
Gm11987	ENSMUSG00000084318	11	7894167	7895855
SNORD75	ENSMUSG00000089247	11	7904945	7905019
Tns3	ENSMUSG00000020422	11	8331655	8564538
Pkd1l1	ENSMUSG00000046634	11	8726711	8873269
Hus1	ENSMUSG00000020413	11	8893140	8911194
Sun3	ENSMUSG00000040985	11	8916057	8948994
Gm11992	ENSMUSG00000040978	11	8948597	8969359
Upp1	ENSMUSG00000020407	11	9018106	9036173
Abca13	ENSMUSG00000004668	11	9091945	9584262
Gm11988	ENSMUSG00000082459	11	8012366	8014097
Gm11989	ENSMUSG00000083553	11	8283185	8283856
Gm11990	ENSMUSG00000081539	11	8705955	8706851
Gm11991	ENSMUSG00000082095	11	8784226	8785299
Gm11993	ENSMUSG00000043177	11	9049781	9050600
Gprc5c	ENSMUSG00000051043	11	114712466	114733931
Cd300a	ENSMUSG00000034652	11	114751355	114765968
Cd300lb	ENSMUSG00000063193	11	114784095	114795700
Cd300c	ENSMUSG00000058728	11	114817430	114830471
Cd300ld	ENSMUSG00000034641	11	114843588	114851236
AF251705	ENSMUSG00000044811	11	114858035	114863194
Gm11709	ENSMUSG00000089753	11	114871649	114877621
Gm11710	ENSMUSG00000069609	11	114882042	114888326
Gm11711	ENSMUSG00000089722	11	114892800	114899083
Cd300lh	ENSMUSG00000069607	11	114903445	114909723
Cd300e	ENSMUSG00000048498	11	114913231	114923491
Rab37	ENSMUSG00000020732	11	114952745	115023550
Cd300lf	ENSMUSG00000047798	11	114977528	114995306
Slc9a3r1	ENSMUSG00000020733	11	115024655	115042495
Nat9	ENSMUSG00000015542	11	115044146	115049173
Tmem104	ENSMUSG00000045980	11	115048801	115108337
Grin2c	ENSMUSG00000020734	11	115110483	115128557
Fdxr	ENSMUSG00000018861	11	115129338	115138364
Fads6	ENSMUSG00000044788	11	115140936	115158977
Otop2	ENSMUSG00000050201	11	115168477	115193617
Ush1g	ENSMUSG00000045288	11	115176506	115183355
Otop3	ENSMUSG00000018862	11	115196045	115208241
C630004H02Rik	ENSMUSG00000034586	11	115209021	115229070
Cdr2l	ENSMUSG00000050910	11	115243230	115257446
Ict1	ENSMUSG00000018858	11	115265066	115273988
Atp5h	ENSMUSG00000034566	11	115277003	115281276
Kctd2	ENSMUSG00000016940	11	115281440	115292588
4933422H20Rik	ENSMUSG00000070332	11	115301859	115309584
Slc16a5	ENSMUSG00000045775	11	115323788	115335712
Armc7	ENSMUSG00000057219	11	115336981	115351781
Nt5c	ENSMUSG00000020736	11	115351734	115353176
Hn1	ENSMUSG00000020737	11	115358667	115375701
Sumo2	ENSMUSG00000020738	11	115384416	115397590
Nup85	ENSMUSG00000020739	11	115425748	115445299
Gga3	ENSMUSG00000020740	11	115445569	115465365
Mrps7	ENSMUSG00000046756	11	115465239	115469350
Mif4gd	ENSMUSG00000020743	11	115469232	115474283
Slc25a19	ENSMUSG00000020744	11	115475492	115489595
Grb2	ENSMUSG00000059923	11	115505359	115569911
2310067B10Rik	ENSMUSG00000020747	11	115626747	115660680
Caskin2	ENSMUSG00000034471	11	115660497	115674953
Tsen54	ENSMUSG00000020781	11	115676038	115684408
Llgl2	ENSMUSG00000020782	11	115685363	115717094
Itgb4	ENSMUSG00000020758	11	115836023	115869726
Gm11698	ENSMUSG00000083237	11	114770045	114770499
Gm16831	ENSMUSG00000084868	11	116168178	116170824
Cygb	ENSMUSG00000020810	11	116506909	116515627
Gm11744	ENSMUSG00000075410	11	116514848	116529703
1810032O08Rik	ENSMUSG00000020812	11	116532974	116537113
St6galnac2	ENSMUSG00000057286	11	116536617	116556182
St6galnac1	ENSMUSG00000009588	11	116600308	116636821
Gm17558	ENSMUSG00000091913	11	116654348	116655837
Mxra7	ENSMUSG00000020814	11	116664376	116689360
Gm11699	ENSMUSG00000083677	11	114794185	114794585
C920011F04Rik	ENSMUSG00000085072	11	115267900	115269628
Gm11695	ENSMUSG00000085651	11	115323359	115324768
Gm11694	ENSMUSG00000081376	11	115354338	115354496
Gm11702	ENSMUSG00000084277	11	115518805	115518873
Gm11703	ENSMUSG00000083016	11	115585608	115586148
Gm11704	ENSMUSG00000084130	11	115590780	115590993
2210020M01Rik	ENSMUSG00000048442	11	115761280	115767583
Rpl29-ps3	ENSMUSG00000087072	11	115786341	115787457
Gm11721	ENSMUSG00000087064	11	115807764	115813419
Gm11741	ENSMUSG00000081929	11	116244064	116244519
Gm11739	ENSMUSG00000086826	11	116327633	116335588
Rpl36-ps1	ENSMUSG00000081318	11	116365850	116366152
Gm11742	ENSMUSG00000083314	11	116411732	116411964
Gm11735	ENSMUSG00000078586	11	116600376	116611147
BC018473	ENSMUSG00000056032	11	116613481	116620687
Rnf157	ENSMUSG00000052949	11	116197667	116274346
Aanat	ENSMUSG00000020804	11	116447746	116458994
Rhbdf2	ENSMUSG00000020806	11	116459479	116488333
Srp68	ENSMUSG00000020780	11	116106480	116135531
Galr2	ENSMUSG00000020793	11	116142253	116145252
Exoc7	ENSMUSG00000020792	11	116149315	116168547
Gm17246	ENSMUSG00000090902	11	115476776	115488021
B230344G16Rik	ENSMUSG00000084827	11	115849366	115855029
Recql5	ENSMUSG00000020752	11	115753909	115794791
H3f3b	ENSMUSG00000016559	11	115883226	115889276
Unk	ENSMUSG00000020770	11	115891636	115922528
Unc13d	ENSMUSG00000057948	11	115923409	115939275
Galk1	ENSMUSG00000020766	11	115869771	115874033
Fam100b	ENSMUSG00000050628	11	116295408	116300391
Qrich2	ENSMUSG00000070331	11	116302643	116316551
Prpsap1	ENSMUSG00000015869	11	116332159	116355516
Sphk1	ENSMUSG00000061878	11	116392239	116397988
Fbf1	ENSMUSG00000020776	11	116003599	116029480
1110017F19Rik	ENSMUSG00000075420	11	115773331	115775234
Sap30bp	ENSMUSG00000020755	11	115794596	115828039
Acox1	ENSMUSG00000020777	11	116033202	116060359
Myo15b	ENSMUSG00000034427	11	115722926	115753917
Ube2o	ENSMUSG00000020802	11	116399054	116442761
Wbp2	ENSMUSG00000034341	11	115939887	115948309
Trim47	ENSMUSG00000020773	11	115967066	115988524
Trim65	ENSMUSG00000054517	11	115983160	115992442
Mrpl38	ENSMUSG00000020775	11	115993131	116000182
Foxj1	ENSMUSG00000034227	11	116192018	116196713
2310004N24Rik	ENSMUSG00000020778	11	116060169	116076632
Cdk3-ps	ENSMUSG00000092300	11	116077317	116081601
Evpl	ENSMUSG00000034282	11	116081873	116099391
SNORA70	ENSMUSG00000089460	11	115588457	115588591
AL645852.1	ENSMUSG00000093539	11	115657138	115657200
Snord1b	ENSMUSG00000077604	11	116535462	116535536
snoR38	ENSMUSG00000088007	11	116535107	116535178
Mir3968	ENSMUSG00000093096	11	115309275	115309374
Snord1c	ENSMUSG00000065640	11	116533820	116533895
U6	ENSMUSG00000089476	11	115462970	115463076
AL603828.1	ENSMUSG00000089544	11	115114592	115114699
n-R5s74	ENSMUSG00000064588	11	116187916	116188031
Snord1a	ENSMUSG00000065094	11	116535912	116535985
SCARNA4	ENSMUSG00000088290	11	116025224	116025350
Jmjd6	ENSMUSG00000056962	11	116698746	116704763
Mfsd11	ENSMUSG00000020818	11	116713754	116736949
1110005A03Rik	ENSMUSG00000090266	11	116704592	116715577
Srsf2	ENSMUSG00000034120	11	116711211	116714408
Srsf2	ENSMUSG00000093603	11	116711215	116714408
Mgat5b	ENSMUSG00000043857	11	116780177	116848262
3110053B16Rik	ENSMUSG00000085642	12	20879986	20927123
Gm10478	ENSMUSG00000073179	12	20902100	20902499
Gm20535	ENSMUSG00000092373	12	21257979	21261813
Gm5633	ENSMUSG00000091105	12	21832026	21832574
Gm4419	ENSMUSG00000090621	12	21423772	21425664
Gm10479	ENSMUSG00000073184	12	20421799	20439560
1700030C10Rik	ENSMUSG00000091071	12	20820118	20821588
Zfp125	ENSMUSG00000069755	12	20905683	20906728
Asap2	ENSMUSG00000052632	12	20996320	21276032
Itgb1bp1	ENSMUSG00000062352	12	21246686	21292098
Cpsf3	ENSMUSG00000054309	12	21292158	21320917
Iah1	ENSMUSG00000062054	12	21322253	21329466
Adam17	ENSMUSG00000052593	12	21329370	21379493
Ywhaq	ENSMUSG00000076432	12	21395932	21423498
Gm17680	ENSMUSG00000073183	12	21834340	21834747
AC140457.1	ENSMUSG00000093145	12	21373579	21373652
AC156032.1	ENSMUSG00000093197	12	21279165	21279393
SNORA21	ENSMUSG00000070166	12	21293788	21293920
U6	ENSMUSG00000088997	12	21360215	21360313
Gm1818	ENSMUSG00000091277	12	49655169	49660958
Foxg1	ENSMUSG00000020950	12	50483680	50487843
3110039M20Rik	ENSMUSG00000089922	12	50486161	50508333
Gm9804	ENSMUSG00000045946	12	50502264	50502824
U6	ENSMUSG00000064616	12	50110870	50110976
Prkd1	ENSMUSG00000002688	12	51442218	51750210
SNORA17	ENSMUSG00000089025	12	50679443	50679570
SNORA25	ENSMUSG00000088966	12	52186674	52186790
Gm9808	ENSMUSG00000046620	12	52398474	52398950
G2e3	ENSMUSG00000035293	12	52449048	52477973
Scfd1	ENSMUSG00000020952	12	52478567	52551083
Coch	ENSMUSG00000020953	12	52694361	52706760
Strn3	ENSMUSG00000020954	12	52709528	52792901
Ap4s1	ENSMUSG00000020955	12	52791953	52839918
Hectd1	ENSMUSG00000035247	12	52844709	52930523
U6	ENSMUSG00000089346	12	52841228	52841329
Gm17603	ENSMUSG00000090819	12	52989002	52990446
Heatr5a	ENSMUSG00000035181	12	52976860	53072308
Gpr33	ENSMUSG00000035148	12	53123990	53129050
6530401N04Rik	ENSMUSG00000020956	12	53089299	53107488
Nubpl	ENSMUSG00000035142	12	53198724	53413731
Akap6	ENSMUSG00000061603	12	53800370	54252002
Arhgap5	ENSMUSG00000035133	12	53617064	53668839
U6	ENSMUSG00000064489	12	53705472	53705578
U6	ENSMUSG00000064663	12	53704775	53704881
n-R5s58	ENSMUSG00000070192	12	54147695	54147813
Npas3	ENSMUSG00000021010	12	54349664	55173162
Gm7555	ENSMUSG00000071329	12	55529160	55529546
Eapp	ENSMUSG00000054302	12	55771327	55796884
Egln3	ENSMUSG00000035105	12	55279968	55304847
1110002B05Rik	ENSMUSG00000044408	12	55746361	55757559
Gm16382	ENSMUSG00000072255	12	55802283	55802698
Snx6	ENSMUSG00000005656	12	55847336	55896690
AC155256.1	ENSMUSG00000093322	12	55767664	55767773
U1	ENSMUSG00000088386	12	55341742	55341887
U1	ENSMUSG00000075943	12	55811295	55811458
U1	ENSMUSG00000075789	12	55820150	55820313
U1	ENSMUSG00000075736	12	55797769	55797932
U1	ENSMUSG00000064605	12	55340225	55340373
U1	ENSMUSG00000075825	12	55839446	55839609
U1	ENSMUSG00000075996	12	55815205	55815368
U1	ENSMUSG00000075960	12	55835542	55835705
U1	ENSMUSG00000075923	12	55830589	55830752
Cfl2	ENSMUSG00000062929	12	55959804	55963864
Baz1a	ENSMUSG00000035021	12	55993976	56115335
Gm3327	ENSMUSG00000090594	14	44701516	44706708
Ear2	ENSMUSG00000072596	14	44680319	44681199
Gpr137c	ENSMUSG00000049092	14	45839394	45900905
Ero1l	ENSMUSG00000021831	14	45902879	45938237
Psmc6	ENSMUSG00000021832	14	45949504	45969367
Styx	ENSMUSG00000053205	14	45970854	45993451
Gnpnat1	ENSMUSG00000037722	14	45996009	46008477
Fermt2	ENSMUSG00000037712	14	46078467	46149793
Ear-ps12	ENSMUSG00000089654	14	44431394	44431844
Ang-ps2	ENSMUSG00000089925	14	44442582	44443014
Ear-ps9	ENSMUSG00000072600	14	44452533	44452999
Ear-ps8	ENSMUSG00000089816	14	44479350	44479703
Ang-ps3	ENSMUSG00000090092	14	44490657	44491089
Gm9550	ENSMUSG00000090265	14	44518662	44519523
Ear-ps7	ENSMUSG00000089754	14	44546742	44547183
Ear-ps10	ENSMUSG00000090109	14	44569379	44569838
Gm8194	ENSMUSG00000090051	14	44599265	44600123
Gm3287	ENSMUSG00000090249	14	44603669	44615191
Ear-ps2	ENSMUSG00000072599	14	44624650	44625115
Ang-ps1	ENSMUSG00000090180	14	44634648	44635083
Gm16545	ENSMUSG00000090259	14	44652226	44652688
Gm8207	ENSMUSG00000091048	14	44716050	44718210
Gm8224	ENSMUSG00000091707	14	44885354	44887571
Gm3370	ENSMUSG00000092144	14	44957535	44959758
Gm17184	ENSMUSG00000072574	14	45097008	45099582
Gm17183	ENSMUSG00000091466	14	45150472	45152677
Gm16439	ENSMUSG00000072594	14	45216340	45216903
Gm8256	ENSMUSG00000091605	14	45234367	45236794
Gm9593	ENSMUSG00000090736	14	45242963	45245165
Gm6541	ENSMUSG00000090296	14	45307166	45309549
Gm6541	ENSMUSG00000091453	14	45321533	45323762
Gm17187	ENSMUSG00000091011	14	45397138	45399437
Gm17070	ENSMUSG00000090365	14	45424376	45425159
Gm16976	ENSMUSG00000085500	14	45478346	45594619
4930431P03Rik	ENSMUSG00000075042	14	45574892	45580982
Gm17173	ENSMUSG00000090709	14	45591943	45626575
Gm15765	ENSMUSG00000082463	14	45831198	45832107
Gm15601	ENSMUSG00000085913	14	46207415	46218187
A530076I17Rik	ENSMUSG00000086124	14	46286298	46288173
Gm15516	ENSMUSG00000082662	14	46332807	46332999
Gm7206	ENSMUSG00000082475	14	46333019	46333398
Ddhd1	ENSMUSG00000037697	14	46212849	46277818
Ear1	ENSMUSG00000072601	14	44396430	44397304
Ear10	ENSMUSG00000090166	14	44500385	44501224
Gm8113	ENSMUSG00000089901	14	44503055	44511076
Ang5	ENSMUSG00000053961	14	44534734	44540745
Ang6	ENSMUSG00000072598	14	44579329	44584083
Gm17340	ENSMUSG00000092161	14	44603224	44603842
Gm17564	ENSMUSG00000091777	14	44606030	44606639
4930503E14Rik	ENSMUSG00000072595	14	44740834	44749036
Gm8212	ENSMUSG00000091783	14	44775326	44780798
Gm8220	ENSMUSG00000091725	14	44863245	44868733
Gm5930	ENSMUSG00000079267	14	44908107	44916249
Gm8229	ENSMUSG00000090379	14	44943022	44948506
Gm3371	ENSMUSG00000090716	14	44980336	44986490
Gm8232	ENSMUSG00000091569	14	45052772	45058223
BC061237	ENSMUSG00000072145	14	45119793	45126016
Gm17093	ENSMUSG00000091429	14	45137947	45143115
Gm5624	ENSMUSG00000092165	14	45176470	45182502
Gm8247	ENSMUSG00000091122	14	45202828	45208077
Gm8257	ENSMUSG00000079265	14	45268879	45326131
Gm8267	ENSMUSG00000091923	14	45336513	45344662
Ptgdr	ENSMUSG00000071489	14	45470910	45479050
Ptger2	ENSMUSG00000037759	14	45607870	45623495
Txndc16	ENSMUSG00000021830	14	45754123	45840003
7SK	ENSMUSG00000088769	14	46081038	46081320
AC107711.1	ENSMUSG00000092846	14	46190013	46190083
Mir5131	ENSMUSG00000093167	14	46277636	46277728
mmu-mir-1194	ENSMUSG00000080462	14	46024515	46024635
Tdrd3	ENSMUSG00000022019	14	87816390	87945315
Diap3	ENSMUSG00000022021	14	87055174	87541031
U6	ENSMUSG00000064407	14	86711096	86711185
U1	ENSMUSG00000087812	14	86808329	86808468
SNORA48	ENSMUSG00000088536	14	87746052	87746194
Gm10119	ENSMUSG00000062611	14	88522821	88523615
5S_rRNA	ENSMUSG00000089120	14	88526805	88526904
Pcdh20	ENSMUSG00000050505	14	88864554	88871203
Pcdh9	ENSMUSG00000055421	14	93414731	94287951
U1	ENSMUSG00000065014	14	93537249	93537408
SNORA17	ENSMUSG00000077298	14	92767719	92767848
Atp13a5	ENSMUSG00000048939	16	29231937	29378818
Atp13a4	ENSMUSG00000038094	16	29396124	29544950
Opa1	ENSMUSG00000038084	16	29579420	29654970
Gm1968	ENSMUSG00000075286	16	29958579	29962393
Hes1	ENSMUSG00000022528	16	30064470	30067882
Cpn2	ENSMUSG00000023176	16	30256464	30267618
Lrrc15	ENSMUSG00000052316	16	30269388	30283342
Gp5	ENSMUSG00000047953	16	30307772	30310865
Atp13a3	ENSMUSG00000022533	16	30312509	30388923
Tmem44	ENSMUSG00000022537	16	30511941	30550928
Lsg1	ENSMUSG00000022538	16	30560580	30587678
Fam43a	ENSMUSG00000046546	16	30599809	30602883
AI480653	ENSMUSG00000047434	16	30955713	31081518
Acap2	ENSMUSG00000049076	16	31092499	31201324
Ppp1r2	ENSMUSG00000047714	16	31251623	31275363
Apod	ENSMUSG00000022548	16	31296278	31314894
Gm15742	ENSMUSG00000087605	16	30969479	30973604
Gm17734	ENSMUSG00000090506	16	29811144	29837900
Gm16761	ENSMUSG00000084810	16	29907605	29946603
4632428C04Rik	ENSMUSG00000086897	16	30008753	30021516
Gm17516	ENSMUSG00000080134	16	30200996	30205965
SNORA17	ENSMUSG00000088782	16	30889182	30889316
U6	ENSMUSG00000064754	16	30814248	30814354
n-R5s32	ENSMUSG00000084444	16	30141929	30142031
Bdh1	ENSMUSG00000046598	16	31422366	31458987
Gm15743	ENSMUSG00000086645	16	31427962	31428377
4931408A02Rik	ENSMUSG00000039903	16	90826964	90905354
1110004E09Rik	ENSMUSG00000022972	16	90926054	90935172
Synj1	ENSMUSG00000022973	16	90936337	91011553
Gcfc1	ENSMUSG00000022974	16	91014282	91044788
4932438H23Rik	ENSMUSG00000039851	16	91054180	91095367
Gm9881	ENSMUSG00000052471	16	91168442	91171646
Olig2	ENSMUSG00000039830	16	91225795	91228922
Olig1	ENSMUSG00000046160	16	91270014	91272184
Ifnar2	ENSMUSG00000022971	16	91373028	91405834
RP23-190G10.4	ENSMUSG00000093701	16	91391966	91419696
Il10rb	ENSMUSG00000022969	16	91406409	91426079
Ifnar1	ENSMUSG00000022967	16	91485483	91507686
Ifngr2	ENSMUSG00000022965	16	91547317	91565414
Tmem50b	ENSMUSG00000022964	16	91574748	91598045
Dnajc28	ENSMUSG00000039763	16	91614502	91619271
Gart	ENSMUSG00000022962	16	91621431	91647197
Son	ENSMUSG00000022961	16	91647751	91679466
Donson	ENSMUSG00000022960	16	91677513	91689010
Atp5o	ENSMUSG00000022956	16	91684643	91931932
Cryzl1	ENSMUSG00000058240	16	91689567	91729220
Itsn1	ENSMUSG00000022957	16	91729526	91920842
Mrps6	ENSMUSG00000039680	16	92058515	92112472
Slc5a3	ENSMUSG00000089774	16	92058567	92087718
Kcne2	ENSMUSG00000039672	16	92292634	92298374
Fam165b	ENSMUSG00000051989	16	92301531	92313286
4930563D23Rik	ENSMUSG00000051728	16	92319008	92321686
Kcne1	ENSMUSG00000039639	16	92346246	92359713
Rcan1	ENSMUSG00000022951	16	92392198	92466391
2410124H12Rik	ENSMUSG00000051297	16	92478988	92497610
Clic6	ENSMUSG00000022949	16	92485981	92541488
Runx1	ENSMUSG00000022952	16	92601712	92826311
Gm16309	ENSMUSG00000079514	16	92078307	92084053
Gm15976	ENSMUSG00000087240	16	91924683	91928880
D430001F17Rik	ENSMUSG00000087190	16	91931482	91963160
Gm16801	ENSMUSG00000086934	16	92613059	92620350
Gm16310	ENSMUSG00000086331	16	92094813	92096735
Gm15980	ENSMUSG00000085637	16	92308961	92312711
Gm7831	ENSMUSG00000083226	16	90915425	90915976
Gm15965	ENSMUSG00000085279	16	90984152	90987482
4930404I05Rik	ENSMUSG00000087354	16	91011494	91016988
4931406G06Rik	ENSMUSG00000085398	16	91044901	91056922
H3f3a-ps2	ENSMUSG00000081176	16	91114434	91114844
Gm15966	ENSMUSG00000085865	16	91320697	91329240
A930006K02Rik	ENSMUSG00000084866	16	91465349	91470366
Gm7856	ENSMUSG00000084301	16	91513386	91514878
Gm7860	ENSMUSG00000082535	16	91539427	91540305
Gm15964	ENSMUSG00000085337	16	91611713	91624106
Gm10785	ENSMUSG00000085169	16	91689156	91715887
U4	ENSMUSG00000065811	16	91349947	91350029
U6	ENSMUSG00000089293	16	92042922	92043019
AC134560.1	ENSMUSG00000093256	16	90954040	90954113
U6	ENSMUSG00000064623	16	91921554	91921660

## Sheet: longevityIgG1-FHA
Gene Name	Ensembl Gene ID	Chromosome	Start	End
Il17a	ENSMUSG00000025929	1	20720986	20724577
Il17f	ENSMUSG00000041872	1	20767232	20774351
Mcm3	ENSMUSG00000041859	1	20793055	20810359
Paqr8	ENSMUSG00000025931	1	20880691	20929632
Efhc1	ENSMUSG00000041809	1	20941707	20980919
Tram2	ENSMUSG00000041779	1	20986377	21069310
Tmem14a	ENSMUSG00000025933	1	21208656	21220248
Gsta3	ENSMUSG00000025934	1	21230670	21255442
Gm4956	ENSMUSG00000025936	1	21275327	21288393
Khdc1a	ENSMUSG00000067750	1	21339722	21342281
Khdc1c	ENSMUSG00000041722	1	21358412	21360926
Khdc1b	ENSMUSG00000085079	1	21373637	21376465
Kcnq5	ENSMUSG00000028033	1	21388484	21952023
Rims1	ENSMUSG00000041670	1	22276332	22911673
Gm7094	ENSMUSG00000046847	1	21262484	21262990
Gm16329	ENSMUSG00000086194	1	21344086	21345197
Gm16327	ENSMUSG00000087453	1	21354884	21355111
Gm2709	ENSMUSG00000085507	1	21362751	21363845
Gm16533	ENSMUSG00000087427	1	21369636	21369863
Gm16328	ENSMUSG00000085679	1	21380987	21381182
Gm7658	ENSMUSG00000082935	1	21502014	21503137
6720483E21Rik	ENSMUSG00000087078	1	20878731	20880554
Gm16705	ENSMUSG00000085163	1	21949923	21952611
SNORA17	ENSMUSG00000088858	1	20832616	20832747
Mir206	ENSMUSG00000065559	1	20669091	20669163
Mir133b	ENSMUSG00000065480	1	20672850	20672968
SNORA17	ENSMUSG00000077314	1	20905491	20905621
Khdrbs2	ENSMUSG00000026058	1	32229651	32714583
Gm9839	ENSMUSG00000049830	1	32576408	32577844
Gm5415	ENSMUSG00000091318	1	32600391	32604138
Prim2	ENSMUSG00000026134	1	33510656	33726631
1700001G17Rik	ENSMUSG00000044744	1	33726688	33727557
Rab23	ENSMUSG00000004768	1	33776727	33799409
Bag2	ENSMUSG00000042215	1	33802329	33814639
Zfp451	ENSMUSG00000042197	1	33817317	33871440
Bend6	ENSMUSG00000042182	1	33908897	33964661
Dst	ENSMUSG00000026131	1	33965125	34365495
Gm16750	ENSMUSG00000085306	1	34222701	34235118
Gm15455	ENSMUSG00000081402	1	33892744	33895759
U6	ENSMUSG00000065223	1	33350521	33350620
U7	ENSMUSG00000089489	1	32625204	32625266
U6	ENSMUSG00000084506	1	34038255	34038347
U6	ENSMUSG00000065260	1	33479578	33479683
7SK	ENSMUSG00000089395	1	32783484	32783775
U6	ENSMUSG00000088750	1	33248838	33248947
Gm9915	ENSMUSG00000053640	1	42286571	42287953
Pou3f3	ENSMUSG00000045515	1	42753991	42757052
Mrps9	ENSMUSG00000060679	1	42908078	42962527
Gpr45	ENSMUSG00000079587	1	43009719	43011992
Gpr45	ENSMUSG00000041907	1	43088905	43090450
Tgfbrap1	ENSMUSG00000070939	1	43104114	43155467
8430432A02Rik	ENSMUSG00000041878	1	43149433	43150680
AI597479	ENSMUSG00000010290	1	43155555	43172792
Fhl2	ENSMUSG00000008136	1	43179919	43220806
2610017I09Rik	ENSMUSG00000060424	1	42705007	42724517
RP23-71K9.1	ENSMUSG00000093778	1	42749785	42751670
RP23-114H2.1	ENSMUSG00000093436	1	42751770	42797813
Gm8210	ENSMUSG00000067579	1	43246001	43246483
AC112941.1	ENSMUSG00000089088	1	43093690	43093774
SNORA17	ENSMUSG00000077448	1	42923530	42923663
Rbbp5	ENSMUSG00000026439	1	134373944	134402242
Tmem81	ENSMUSG00000048174	1	134402807	134405214
Cntn2	ENSMUSG00000053024	1	134406002	134439517
Nfasc	ENSMUSG00000026442	1	134461268	134638374
Lrrn2	ENSMUSG00000026443	1	134776850	134836582
Mdm4	ENSMUSG00000054387	1	134886422	134921943
Pik3c2b	ENSMUSG00000026447	1	134942244	135005264
Ppp1r15b	ENSMUSG00000046062	1	135027720	135036377
Plekha6	ENSMUSG00000041757	1	135142674	135200012
Golt1a	ENSMUSG00000041717	1	135206400	135219603
Kiss1	ENSMUSG00000091251	1	135218452	135226478
Ren1	ENSMUSG00000070645	1	135247087	135256902
Etnk2	ENSMUSG00000070644	1	135260149	135276913
Sox13	ENSMUSG00000070643	1	135278880	135320954
Snrpe	ENSMUSG00000090553	1	135500448	135506868
Zc3h11a	ENSMUSG00000026464	1	135516448	135557957
Lax1	ENSMUSG00000051998	1	135575606	135586685
Gm17678	ENSMUSG00000091176	1	135598216	135598458
Atp2b4	ENSMUSG00000026463	1	135599255	135697618
Optc	ENSMUSG00000010311	1	135793773	135804576
Prelp	ENSMUSG00000041577	1	135806881	135817991
Fmod	ENSMUSG00000041559	1	135933831	135944854
Btg2	ENSMUSG00000020423	1	135971747	135975697
Gm8618	ENSMUSG00000073559	1	136005915	136006417
Chit1	ENSMUSG00000026450	1	136007819	136048117
Chi3l1	ENSMUSG00000064246	1	136078753	136086758
Mybph	ENSMUSG00000042451	1	136090025	136097808
Adora1	ENSMUSG00000042429	1	136095800	136132008
Myog	ENSMUSG00000026459	1	136186581	136189124
Ppfia4	ENSMUSG00000026458	1	136193360	136229505
Tmem183a	ENSMUSG00000042305	1	136242674	136258576
4933406M09Rik	ENSMUSG00000050526	1	136282517	136287560
Cyb5r1	ENSMUSG00000026456	1	136302358	136308317
Adipor1	ENSMUSG00000026457	1	136311955	136329928
Klhl12	ENSMUSG00000026455	1	136352108	136387595
6030442K20Rik	ENSMUSG00000090678	1	134363010	134373622
Gm17713	ENSMUSG00000092104	1	135506988	135510999
Gm15851	ENSMUSG00000090208	1	135803108	135811399
SNORA32	ENSMUSG00000064814	1	135497800	135497932
U6	ENSMUSG00000084509	1	136177462	136177568
SNORA17	ENSMUSG00000088911	1	134710805	134710925
Rgs5	ENSMUSG00000026678	1	171585632	171625944
Rgs4	ENSMUSG00000038530	1	171671608	171677773
1700084C01Rik	ENSMUSG00000070532	1	171858779	171864784
Hsd17b7	ENSMUSG00000026675	1	171879666	171899372
Ddr2	ENSMUSG00000026674	1	171902439	172040632
Uap1	ENSMUSG00000026670	1	172072069	172105088
Uhmk1	ENSMUSG00000026667	1	172123551	172145528
4930500M09Rik	ENSMUSG00000044306	1	172144991	172145687
Sh2d1b2	ENSMUSG00000073494	1	172162880	172183739
Sh2d1b1	ENSMUSG00000026673	1	172207507	172216900
Gm7694	ENSMUSG00000079188	1	172231277	172232958
Nos1ap	ENSMUSG00000038473	1	172232799	172519992
1700015E13Rik	ENSMUSG00000042800	1	172238934	172242256
Olfml2b	ENSMUSG00000038463	1	172574663	172612920
Atf6	ENSMUSG00000026663	1	172634588	172797902
Dusp12	ENSMUSG00000026659	1	172803629	172815671
Fcrlb	ENSMUSG00000070524	1	172837404	172843072
Fcrla	ENSMUSG00000038421	1	172847707	172857714
Fcgr2b	ENSMUSG00000026656	1	172890689	172906678
Fcgr4	ENSMUSG00000059089	1	172949051	172959892
Fcgr3	ENSMUSG00000059498	1	172981300	172995066
1700009P17Rik	ENSMUSG00000026649	1	173044049	173057098
Sdhc	ENSMUSG00000058076	1	173057296	173080734
Mpz	ENSMUSG00000056569	1	173080842	173091261
Pcp4l1	ENSMUSG00000038370	1	173103393	173126399
Nr1i3	ENSMUSG00000005677	1	173144101	173150832
Tomm40l	ENSMUSG00000005674	1	173147933	173152645
Apoa2	ENSMUSG00000005681	1	173155185	173156510
Fcer1g	ENSMUSG00000058715	1	173159703	173164496
Ndufs2	ENSMUSG00000013593	1	173164984	173177253
Adamts4	ENSMUSG00000006403	1	173180552	173190768
B4galt3	ENSMUSG00000052423	1	173200459	173207027
Ppox	ENSMUSG00000062729	1	173206121	173211317
Usp21	ENSMUSG00000053483	1	173212076	173218122
Ufc1	ENSMUSG00000062963	1	173218694	173225155
Rpl27-ps1	ENSMUSG00000079137	1	173235215	173235625
Dedd	ENSMUSG00000013973	1	173259276	173272462
Nit1	ENSMUSG00000013997	1	173268139	173275777
Pfdn2	ENSMUSG00000006412	1	173275801	173289385
Klhdc9	ENSMUSG00000045259	1	173288577	173290929
Pvrl4	ENSMUSG00000006411	1	173300230	173318729
Arhgap30	ENSMUSG00000048865	1	173319085	173340429
Usf1	ENSMUSG00000026641	1	173341444	173349273
Tstd1	ENSMUSG00000091166	1	173349164	173350483
F11r	ENSMUSG00000038235	1	173367666	173394734
B930036N10Rik	ENSMUSG00000091993	1	173432927	173434242
Alyref2	ENSMUSG00000060244	1	173433609	173434881
Gm9765	ENSMUSG00000038218	1	173445364	173447053
Itln1	ENSMUSG00000038209	1	173448253	173465425
Cd244	ENSMUSG00000004709	1	173489324	173515449
3110045C21Rik	ENSMUSG00000085494	1	171899540	171902526
Gm15852	ENSMUSG00000089990	1	171862829	171864379
Gm9929	ENSMUSG00000053925	1	172798776	172811852
Gm2962	ENSMUSG00000089838	1	172855440	172855775
Gm17520	ENSMUSG00000092117	1	173353316	173367449
U6	ENSMUSG00000064448	1	172762896	172763002
U5	ENSMUSG00000065033	1	173433179	173433294
SNORA40	ENSMUSG00000087747	1	173238178	173238268
U6	ENSMUSG00000064611	1	172681848	172681954
U1	ENSMUSG00000065905	1	172958096	172958260
U6	ENSMUSG00000064674	1	171729581	171729687
Ly9	ENSMUSG00000004707	1	173518755	173537541
Slamf7	ENSMUSG00000038179	1	173562534	173579149
Cd48	ENSMUSG00000015355	1	173612140	173635389
Gm15431	ENSMUSG00000059058	1	173641219	173641413
U6	ENSMUSG00000088291	1	173662191	173662245
U6	ENSMUSG00000065390	1	173663430	173663536
Slamf1	ENSMUSG00000015316	1	173697258	173731315
Cd84	ENSMUSG00000038147	1	173769828	173820849
Gm10521	ENSMUSG00000073492	1	173825795	173828368
Slamf6	ENSMUSG00000015314	1	173847646	173879083
Plxna2	ENSMUSG00000026640	1	196446023	196643063
Cd34	ENSMUSG00000016494	1	196765015	196787486
Cd46	ENSMUSG00000016493	1	196867479	196918442
Cr1l	ENSMUSG00000016481	1	196929983	196957764
Cr2	ENSMUSG00000026616	1	196963005	197002909
A330023F24Rik	ENSMUSG00000073474	1	196802569	196864102
Gm16897	ENSMUSG00000086469	1	196781953	196803153
7SK	ENSMUSG00000084631	1	196684851	196685144
Mir29c	ENSMUSG00000065548	1	196863741	196863828
Mir29b-2	ENSMUSG00000065412	1	196863234	196863314
AC109145.1	ENSMUSG00000080633	1	197054472	197054592
Mir3962	ENSMUSG00000092633	1	196648195	196648258
Olfr1179	ENSMUSG00000075127	2	88242166	88243089
Olfr1180	ENSMUSG00000075126	2	88251784	88252846
Olfr1181	ENSMUSG00000075125	2	88263245	88264180
Olfr1182	ENSMUSG00000075124	2	88286176	88287093
Olfr1183	ENSMUSG00000049372	2	88301074	88302768
Olfr1184	ENSMUSG00000051424	2	88326891	88327826
Olfr1186	ENSMUSG00000057735	2	88365658	88366747
Olfr1187-ps1	ENSMUSG00000068810	2	88380281	88380667
Olfr1188	ENSMUSG00000068809	2	88399608	88400575
Olfr1189	ENSMUSG00000068808	2	88431963	88432883
Olfr1193	ENSMUSG00000060827	2	88518014	88518970
Olfr1195	ENSMUSG00000075121	2	88522961	88523887
Olfr1196	ENSMUSG00000075120	2	88540540	88541484
Olfr1197	ENSMUSG00000075119	2	88568810	88569754
Olfr1198	ENSMUSG00000075117	2	88586117	88587043
Olfr1199	ENSMUSG00000089892	2	88595898	88596830
Olfr1200	ENSMUSG00000075115	2	88607460	88608470
Olfr1201	ENSMUSG00000059023	2	88634541	88635464
Olfr1202	ENSMUSG00000064084	2	88657330	88658259
Olfr1205	ENSMUSG00000057447	2	88671276	88672199
Olfr1204	ENSMUSG00000061798	2	88692109	88693038
Olfr1206	ENSMUSG00000062757	2	88704764	88705687
Olfr1208	ENSMUSG00000075114	2	88736731	88737805
Olfr1209	ENSMUSG00000075113	2	88749616	88750548
Olfr1211	ENSMUSG00000075112	2	88769535	88770470
Olfr1212	ENSMUSG00000048226	2	88798625	88799714
Olfr1213	ENSMUSG00000089751	2	88813111	88820414
Olfr1214	ENSMUSG00000075110	2	88827422	88828357
Olfr1215	ENSMUSG00000075108	2	88841505	88842447
Olfr1216	ENSMUSG00000075107	2	88853284	88854219
Olfr1217	ENSMUSG00000075106	2	88863152	88864256
Olfr1218	ENSMUSG00000075105	2	88894646	88895581
Olfr1219	ENSMUSG00000075104	2	88914311	88915246
Olfr1220	ENSMUSG00000075103	2	88937095	88938120
Olfr1221	ENSMUSG00000075102	2	88951732	88952667
Olfr1222	ENSMUSG00000075101	2	88964951	88965888
Olfr1223	ENSMUSG00000075100	2	88984243	88991493
Olfr1224-ps1	ENSMUSG00000075099	2	88996395	88997330
Olfr1225	ENSMUSG00000075098	2	89010376	89011402
Olfr1226	ENSMUSG00000075097	2	89033257	89034189
Olfr1228	ENSMUSG00000075096	2	89088839	89089932
Olfr1229	ENSMUSG00000075095	2	89122296	89128111
Olfr1230	ENSMUSG00000075094	2	89136508	89137425
Olfr1231	ENSMUSG00000075093	2	89142806	89143747
Olfr1232	ENSMUSG00000075092	2	89165400	89166335
Olfr1233	ENSMUSG00000075091	2	89179464	89180505
Olfr1234	ENSMUSG00000075090	2	89202640	89205022
Olfr1238	ENSMUSG00000075089	2	89246287	89247235
Olfr1239	ENSMUSG00000075088	2	89257651	89258568
Olfr153	ENSMUSG00000061520	2	87371953	87373210
Olfr1128	ENSMUSG00000075156	2	87384764	87385699
Olfr1129	ENSMUSG00000062272	2	87414062	87416187
Olfr1130	ENSMUSG00000059205	2	87446369	87448491
Olfr1131	ENSMUSG00000068819	2	87468622	87469551
Olfr1132	ENSMUSG00000068818	2	87474976	87475902
Olfr1133	ENSMUSG00000075155	2	87485337	87486278
Olfr1134	ENSMUSG00000075154	2	87496082	87498614
Olfr1135	ENSMUSG00000075153	2	87511590	87512522
Olfr1136	ENSMUSG00000075151	2	87533048	87534104
Olfr1137	ENSMUSG00000075150	2	87551129	87552061
Olfr1138	ENSMUSG00000075149	2	87577544	87578479
Olfr1140	ENSMUSG00000068817	2	87586318	87587395
Olfr1141	ENSMUSG00000075148	2	87593213	87594148
Olfr152	ENSMUSG00000068816	2	87622693	87623643
Olfr1143	ENSMUSG00000068815	2	87642548	87643492
Olfr1145	ENSMUSG00000068814	2	87649979	87650956
Olfr1148	ENSMUSG00000061875	2	87673198	87674142
Olfr1151	ENSMUSG00000047039	2	87697334	87698260
Olfr1152	ENSMUSG00000045225	2	87708150	87709082
Olfr1153	ENSMUSG00000048197	2	87736334	87737290
Olfr1154	ENSMUSG00000075146	2	87742899	87743831
Olfr1155	ENSMUSG00000075145	2	87782839	87783783
Olfr1156	ENSMUSG00000075144	2	87789347	87790422
Olfr1157	ENSMUSG00000075143	2	87802109	87808414
Olfr74	ENSMUSG00000075142	2	87813864	87814820
Olfr1158	ENSMUSG00000062793	2	87830270	87831211
Olfr1160	ENSMUSG00000075141	2	87845974	87846933
Olfr1161	ENSMUSG00000045150	2	87864859	87865870
Olfr73	ENSMUSG00000075140	2	87874353	87875294
Olfr1162	ENSMUSG00000075139	2	87889835	87890779
Olfr1163	ENSMUSG00000075137	2	87910522	87911564
Olfr1164	ENSMUSG00000075136	2	87933012	87934123
Olfr1166	ENSMUSG00000075135	2	87963523	87965150
Olfr1167	ENSMUSG00000075134	2	87989141	87990240
Olfr1168	ENSMUSG00000061342	2	88025036	88025974
Olfr1170	ENSMUSG00000075133	2	88064237	88065187
Olfr1173	ENSMUSG00000075132	2	88114266	88115204
Olfr1176	ENSMUSG00000050023	2	88179723	88180671
Olfr1178	ENSMUSG00000056995	2	88231406	88232377
Olfr1124	ENSMUSG00000050772	2	87274646	87275602
Olfr1126	ENSMUSG00000058194	2	87297324	87298268
Pramel7	ENSMUSG00000025839	2	87329244	87337250
Gm13738	ENSMUSG00000081762	2	87357189	87357657
Olfr1127-ps1	ENSMUSG00000083267	2	87363669	87364524
Gm13736	ENSMUSG00000082908	2	87366301	87366561
Gm13740	ENSMUSG00000082417	2	87387050	87387359
Gm13744	ENSMUSG00000081132	2	87400077	87400926
Gm13743	ENSMUSG00000083688	2	87403154	87403877
Gm13742	ENSMUSG00000082428	2	87480494	87480950
Gm13741	ENSMUSG00000090018	2	87496668	87498614
Olfr1144-ps1	ENSMUSG00000082227	2	87648515	87648833
Olfr1146-ps1	ENSMUSG00000083185	2	87656688	87657609
Olfr1147-ps1	ENSMUSG00000081908	2	87662767	87663703
Olfr1149-ps1	ENSMUSG00000082982	2	87680136	87680580
Olfr1150-ps1	ENSMUSG00000081234	2	87686430	87687366
Gm13745	ENSMUSG00000082056	2	87711838	87712364
Olfr1159-ps1	ENSMUSG00000081345	2	87838454	87839345
Gm13747	ENSMUSG00000089884	2	87874929	87877843
Olfr1165-ps	ENSMUSG00000046590	2	87941193	87942142
Olfr1169-ps1	ENSMUSG00000084405	2	88037621	88037836
Olfr1171-ps1	ENSMUSG00000082010	2	88093116	88093957
Gm13753	ENSMUSG00000086378	2	88093726	88098830
Olfr1172-ps1	ENSMUSG00000082237	2	88104318	88104521
Olfr1174-ps	ENSMUSG00000080713	2	88150989	88151927
Olfr1175-ps	ENSMUSG00000083855	2	88162898	88163842
Olfr1177-ps	ENSMUSG00000075128	2	88183883	88184884
Gm13757	ENSMUSG00000090097	2	88287048	88289261
Olfr1185-ps1	ENSMUSG00000082882	2	88339244	88340155
Gm13758	ENSMUSG00000081073	2	88412209	88419901
Olfr475-ps1	ENSMUSG00000082885	2	88463462	88464393
Olfr1191-ps1	ENSMUSG00000081948	2	88482905	88483861
Gm13759	ENSMUSG00000087234	2	88488851	88492743
Olfr1192-ps1	ENSMUSG00000081836	2	88492311	88493240
Gm13760	ENSMUSG00000075116	2	88596498	88600618
Gm13763	ENSMUSG00000086737	2	88771107	88778170
Gm13762	ENSMUSG00000075111	2	88813610	88820408
Gm13765	ENSMUSG00000080784	2	88940615	88940842
Gm13764	ENSMUSG00000086793	2	88952666	88957440
Gm13761	ENSMUSG00000082581	2	89021540	89022339
Olfr1235-ps1	ENSMUSG00000084295	2	89225054	89230391
Pramel6	ENSMUSG00000025838	2	87346722	87351029
Olfr1240	ENSMUSG00000075087	2	89279427	89280500
Olfr1241	ENSMUSG00000075086	2	89322346	89323290
Olfr1257	ENSMUSG00000049057	2	89718601	89721966
Olfr1258	ENSMUSG00000049149	2	89767476	89771002
Olfr1259	ENSMUSG00000068806	2	89783341	89784270
Olfr1260	ENSMUSG00000042894	2	89814866	89818869
Olfr1261	ENSMUSG00000061295	2	89831395	89834552
Olfr1262	ENSMUSG00000051313	2	89840302	89843527
Olfr1263	ENSMUSG00000059112	2	89855048	89856076
Olfr1264	ENSMUSG00000075069	2	89861295	89862221
Olfr1265	ENSMUSG00000059910	2	89877078	89878100
Olfr140	ENSMUSG00000075068	2	89891571	89903751
Olfr1269	ENSMUSG00000075067	2	89958757	89959774
Olfr32	ENSMUSG00000075066	2	89978345	89979352
Gm4222	ENSMUSG00000091703	2	89988617	89989045
Olfr1270	ENSMUSG00000075065	2	89989176	89990193
Olfr1506	ENSMUSG00000075064	2	90061724	90064628
Olfr142	ENSMUSG00000075063	2	90092226	90093143
Olfr1271	ENSMUSG00000075062	2	90105517	90106585
Olfr1272	ENSMUSG00000075061	2	90121804	90122730
Gm13769	ENSMUSG00000089859	2	90162379	90165365
Ptprj	ENSMUSG00000025314	2	90269911	90420804
Nup160	ENSMUSG00000051329	2	90517372	90576485
Fnbp4	ENSMUSG00000008200	2	90585527	90621178
Agbl2	ENSMUSG00000040812	2	90622884	90674594
Mtch2	ENSMUSG00000027282	2	90687312	90706967
C1qtnf4	ENSMUSG00000040794	2	90725943	90730683
Ndufs3	ENSMUSG00000005510	2	90734791	90744984
Kbtbd4	ENSMUSG00000005505	2	90744897	90751783
Ptpmt1	ENSMUSG00000063235	2	90750870	90758415
Celf1	ENSMUSG00000005506	2	90780539	90859654
Rapsn	ENSMUSG00000002104	2	90875777	90885886
Psmc3	ENSMUSG00000002102	2	90894166	90906526
Slc39a13	ENSMUSG00000002105	2	90901948	90910574
Sfpi1	ENSMUSG00000002111	2	90922547	90955913
Mybpc3	ENSMUSG00000002100	2	90958301	90976673
Madd	ENSMUSG00000040687	2	90977517	91023994
Nr1h3	ENSMUSG00000002108	2	91024218	91042991
Acp2	ENSMUSG00000002103	2	91043042	91054255
Ddb2	ENSMUSG00000002109	2	91051729	91077139
Pacsin3	ENSMUSG00000027257	2	91096111	91104836
Arfgap2	ENSMUSG00000027255	2	91105131	91117088
1110051M20Rik	ENSMUSG00000040591	2	91115225	91284861
Lrp4	ENSMUSG00000027253	2	91297668	91354058
Ckap5	ENSMUSG00000040549	2	91366919	91460821
F2	ENSMUSG00000027249	2	91465477	91476571
Zfp408	ENSMUSG00000075040	2	91483826	91489948
Arhgap1	ENSMUSG00000027247	2	91490017	91512483
Atg13	ENSMUSG00000027244	2	91514775	91550733
Harbi1	ENSMUSG00000027243	2	91551009	91561702
Ambra1	ENSMUSG00000040506	2	91570291	91759006
A330069E16Rik	ENSMUSG00000073749	2	91077303	91078509
Gm17281	ENSMUSG00000091637	2	91090900	91096152
Olfr1267-ps1	ENSMUSG00000084336	2	89925687	89926616
Olfr1268-ps1	ENSMUSG00000082574	2	89950625	89951548
Gm13768	ENSMUSG00000080223	2	90014254	90035309
RP24-113P16.1	ENSMUSG00000093625	2	90079640	90081580
Olfr1273-ps	ENSMUSG00000080809	2	90136092	90137016
Gm13767	ENSMUSG00000085547	2	90198335	90223320
Olfr1274-ps	ENSMUSG00000082980	2	90240797	90241831
4933423P22Rik	ENSMUSG00000085471	2	90319393	90328582
Rpl30-ps3	ENSMUSG00000080873	2	90587728	90588161
Gm13772	ENSMUSG00000080977	2	90644417	90644733
Gm17661	ENSMUSG00000091037	2	90757800	90758071
Gm13777	ENSMUSG00000082108	2	90870935	90871279
Gm13778	ENSMUSG00000086495	2	90884249	90894090
Gm13783	ENSMUSG00000086206	2	91036063	91042935
Gm13787	ENSMUSG00000081248	2	91184179	91184346
Gm13770	ENSMUSG00000081834	2	91363737	91364041
Gm13771	ENSMUSG00000083832	2	91481842	91482079
Gm13776	ENSMUSG00000082457	2	91556316	91557576
U6	ENSMUSG00000088018	2	91040319	91040424
Snord67	ENSMUSG00000077221	2	91436227	91436337
Chrm4	ENSMUSG00000040495	2	91762346	91769986
Mdk	ENSMUSG00000027239	2	91769962	91772454
Dgkz	ENSMUSG00000040479	2	91772981	91816021
Gm9821	ENSMUSG00000047923	2	91785862	91786173
Gm10805	ENSMUSG00000075036	2	91760685	91761085
Creb3l1	ENSMUSG00000027230	2	91822485	91864659
Gm13780	ENSMUSG00000087197	2	91883530	91936199
Phf21a	ENSMUSG00000058318	2	91933274	92204823
2900072N19Rik	ENSMUSG00000087018	2	91895146	91899526
Gm13786	ENSMUSG00000083951	2	92073262	92073594
Mir1955	ENSMUSG00000088639	2	92032134	92032231
Prokr2	ENSMUSG00000050558	2	132163469	132211183
Rassf2	ENSMUSG00000027339	2	131815151	131855994
Prnd	ENSMUSG00000027338	2	131735693	131781866
1110034G24Rik	ENSMUSG00000044991	2	132512667	132576791
Chgb	ENSMUSG00000027350	2	132607014	132620815
Adra1d	ENSMUSG00000027335	2	131371586	131388021
4930425F17Rik	ENSMUSG00000062501	2	131473561	131474330
Erv3	ENSMUSG00000037482	2	131679414	131685483
Prnp	ENSMUSG00000079037	2	131735664	131764165
5730494N06Rik	ENSMUSG00000027341	2	132065228	132073543
Gm14304	ENSMUSG00000083671	2	131279864	131280376
Gm14285	ENSMUSG00000087524	2	131387350	131388915
Gm14280	ENSMUSG00000086831	2	131478633	131547574
5330413P13Rik	ENSMUSG00000086822	2	131645742	131673396
Gm14282	ENSMUSG00000081422	2	131671092	131671331
Gm14281	ENSMUSG00000083469	2	131672131	131673424
Lamr1-ps1	ENSMUSG00000081229	2	131729822	131730695
Gm14052	ENSMUSG00000082990	2	131925605	131926635
Gm14051	ENSMUSG00000086756	2	131970269	132045986
AV099323	ENSMUSG00000087377	2	132079093	132087069
4921508D12Rik	ENSMUSG00000027345	2	132250477	132278235
Gm14095	ENSMUSG00000086250	2	132308948	132326884
1700026D11Rik	ENSMUSG00000086379	2	132316370	132349793
AU019990	ENSMUSG00000074783	2	132423931	132478804
Rpl23a-ps4	ENSMUSG00000081445	2	132487978	132488432
Gm14099	ENSMUSG00000084089	2	132499121	132499725
Gm14098	ENSMUSG00000081662	2	132504005	132504975
Gm14097	ENSMUSG00000084839	2	132520168	132524259
Gm14104	ENSMUSG00000086575	2	132671735	132672992
Gm14102	ENSMUSG00000086478	2	132784178	132785541
Gm14101	ENSMUSG00000084393	2	132805905	132806904
Gm14103	ENSMUSG00000082940	2	132872923	132873288
Gm14094	ENSMUSG00000083689	2	133025347	133025956
A430048G15Rik	ENSMUSG00000086650	2	133257831	133279098
Gpcpd1	ENSMUSG00000027346	2	132354818	132413465
Trmt6	ENSMUSG00000037376	2	132629943	132641791
Mcm8	ENSMUSG00000027353	2	132641877	132669933
Crls1	ENSMUSG00000027357	2	132672402	132692521
Lrrn4	ENSMUSG00000043110	2	132694041	132706627
Fermt1	ENSMUSG00000027356	2	132729915	132771772
Slc23a2	ENSMUSG00000027340	2	131878232	131970844
Smox	ENSMUSG00000027333	2	131317232	131351658
Pcna	ENSMUSG00000027342	2	132074898	132079050
Cds2	ENSMUSG00000058793	2	132088884	132137786
U1	ENSMUSG00000065050	2	132834223	132834390
U6	ENSMUSG00000064413	2	132542842	132542944
AL831731.1	ENSMUSG00000092654	2	131393747	131393818
Gm14100	ENSMUSG00000087585	2	133288854	133291520
Bmp2	ENSMUSG00000027358	2	133377895	133388621
Mir3090	ENSMUSG00000093338	2	133390444	133390530
U6	ENSMUSG00000064983	2	133410051	133410157
Bpifb9b	ENSMUSG00000067996	2	154132963	154146382
Cdk5rap1	ENSMUSG00000027487	2	154161116	154198746
Snta1	ENSMUSG00000027488	2	154202049	154233835
Cbfa2t2	ENSMUSG00000038533	2	154262217	154365092
Necab3	ENSMUSG00000027489	2	154370135	154384626
1700003F12Rik	ENSMUSG00000038523	2	154372821	154375739
1700007I08Rik	ENSMUSG00000078129	2	154377512	154379012
E2f1	ENSMUSG00000027490	2	154385143	154395628
Pxmp4	ENSMUSG00000000876	2	154411494	154429444
Zfp341	ENSMUSG00000059842	2	154439033	154472557
Chmp4b	ENSMUSG00000038467	2	154477441	154520521
Raly	ENSMUSG00000027593	2	154616832	154692997
a	ENSMUSG00000027596	2	154617138	154876748
Eif2s2	ENSMUSG00000074656	2	154697146	154718671
Gm14226	ENSMUSG00000084897	2	154844002	154852840
Ahcy	ENSMUSG00000027597	2	154885046	154900233
Itch	ENSMUSG00000027598	2	154959245	155052591
Dynlrb1	ENSMUSG00000047459	2	155062269	155076013
Pigu	ENSMUSG00000038383	2	155072732	155183166
Map1lc3a	ENSMUSG00000027602	2	155102033	155103809
Trp53inp2	ENSMUSG00000038375	2	155206795	155215586
Ncoa6	ENSMUSG00000038369	2	155216401	155299630
Ggt7	ENSMUSG00000027603	2	155316115	155343973
Acss2	ENSMUSG00000027605	2	155343684	155411460
Gss	ENSMUSG00000027610	2	155388917	155418546
Myh7b	ENSMUSG00000074652	2	155436948	155460043
Trpc4ap	ENSMUSG00000038324	2	155460007	155518120
Edem2	ENSMUSG00000038312	2	155527413	155555211
Gm17581	ENSMUSG00000092123	2	155561546	155561602
Procr	ENSMUSG00000027611	2	155576853	155581207
Mmp24	ENSMUSG00000027612	2	155601078	155644102
Eif6	ENSMUSG00000027613	2	155645568	155652661
Fam83c	ENSMUSG00000074647	2	155653284	155660590
Uqcc	ENSMUSG00000005882	2	155672630	155756046
Gm15557	ENSMUSG00000078972	2	155766464	155768486
Gdf5	ENSMUSG00000038259	2	155766759	155771103
Cep250	ENSMUSG00000038241	2	155782194	155824636
6430550D23Rik	ENSMUSG00000074646	2	155799015	155833713
Ergic3	ENSMUSG00000005881	2	155833781	155844015
Fer1l4	ENSMUSG00000013338	2	155844875	155878683
Spag4	ENSMUSG00000038180	2	155890911	155896353
Cpne1	ENSMUSG00000074643	2	155897581	155937695
Nfs1	ENSMUSG00000027618	2	155904665	155969922
Rbm12	ENSMUSG00000089824	2	155917694	155937714
Romo1	ENSMUSG00000067847	2	155969775	155971533
Rbm39	ENSMUSG00000027620	2	155972975	156005974
Phf20	ENSMUSG00000038116	2	156022202	156135688
Scand1	ENSMUSG00000046229	2	156137583	156138440
4921517L17Rik	ENSMUSG00000038085	2	156138035	156201374
Gm14198	ENSMUSG00000085483	2	154455738	154458372
Gm14217	ENSMUSG00000082064	2	154529545	154530435
Gm14215	ENSMUSG00000083975	2	154539238	154539458
Gm14216	ENSMUSG00000085691	2	154548088	154564187
Gm14214	ENSMUSG00000082493	2	154594991	154595766
2310005A03Rik	ENSMUSG00000087254	2	154923525	154925817
Gm14227	ENSMUSG00000082596	2	155024368	155024996
Gm14239	ENSMUSG00000080237	2	155285237	155286628
Gm14238	ENSMUSG00000083341	2	155311783	155312105
RP23-260N23.12	ENSMUSG00000093624	2	155368383	155368673
RP23-260N23.13	ENSMUSG00000093687	2	155372121	155372582
4930471I20Rik	ENSMUSG00000086529	2	155372776	155382666
Gm14256	ENSMUSG00000085317	2	155416867	155418587
0610038P03Rik	ENSMUSG00000085010	2	155418055	155420691
Gm14257	ENSMUSG00000087616	2	155419301	155420211
BC029722	ENSMUSG00000074649	2	155643466	155645162
Gm16098	ENSMUSG00000086754	2	155652524	155653689
Gm14240	ENSMUSG00000081002	2	155881864	155882409
Mir695	ENSMUSG00000076216	2	155182553	155182661
SNORA70	ENSMUSG00000088695	2	155478628	155478760
Mir499	ENSMUSG00000076312	2	155448616	155448694
2900097C17Rik	ENSMUSG00000067833	2	156218227	156218565
Gm14251	ENSMUSG00000081751	2	156148138	156148416
Gm14252	ENSMUSG00000085546	2	156158053	156165117
Gm14253	ENSMUSG00000082321	2	156172938	156173576
Gm14170	ENSMUSG00000087323	2	156203661	156204704
Rpl21-ps9	ENSMUSG00000084017	2	156212477	156212958
Gm14173	ENSMUSG00000061272	2	156236616	156236910
AL928935.1	ENSMUSG00000076230	2	156236665	156236760
AL929404.1	ENSMUSG00000076231	2	156148288	156148383
7SK	ENSMUSG00000088637	2	156211843	156212058
Epb4.1l1	ENSMUSG00000027624	2	156246645	156368950
Gm14225	ENSMUSG00000086872	2	156270769	156273344
Gm14224	ENSMUSG00000085524	2	156277642	156281387
0610011L14Rik	ENSMUSG00000027628	2	156373320	156394708
Gm14168	ENSMUSG00000055494	2	156397528	156403193
Dlgap4	ENSMUSG00000061689	2	156439441	156590099
Gm14169	ENSMUSG00000086118	2	156434942	156439158
Gm14174	ENSMUSG00000087508	2	156440183	156441184
Gm14172	ENSMUSG00000083498	2	156458561	156459204
4930405A21Rik	ENSMUSG00000086638	2	156540276	156546645
Gm9791	ENSMUSG00000044434	3	33903939	33904385
Sox2ot	ENSMUSG00000090828	3	34003360	34581541
Gm5708	ENSMUSG00000092249	3	34082229	34083114
Gm20446	ENSMUSG00000092196	3	34197440	34221211
Gm20514	ENSMUSG00000092355	3	34223741	34250637
Gm20515	ENSMUSG00000092242	3	34326295	34334019
Ttc14	ENSMUSG00000027677	3	33698877	33713782
Ccdc39	ENSMUSG00000027676	3	33711284	33743232
Fxr1	ENSMUSG00000027680	3	33919001	33968264
Dnajc19	ENSMUSG00000027679	3	33954942	33980243
Sox2	ENSMUSG00000074637	3	34548927	34551383
SNORA17	ENSMUSG00000077559	3	33857991	33858122
Mir1897	ENSMUSG00000084530	3	34537386	34537464
AC158547.1	ENSMUSG00000093499	3	35224536	35224627
AC137708.1	ENSMUSG00000093307	3	34489443	34489530
Dcun1d1	ENSMUSG00000027708	3	35791900	35836367
Atp11b	ENSMUSG00000037400	3	35653056	35755196
U6	ENSMUSG00000064834	3	35634295	35634399
Gm15952	ENSMUSG00000085655	3	35831967	35841639
A330050B17Rik	ENSMUSG00000086392	3	35898755	35924028
Mccc1	ENSMUSG00000027709	3	35858234	35899600
Ccdc144b	ENSMUSG00000047696	3	35906169	35952469
Gm11548	ENSMUSG00000085320	3	36398726	36405731
Gm11549	ENSMUSG00000085007	3	36413979	36420735
Gm11550	ENSMUSG00000083388	3	36438305	36439003
Gm12377	ENSMUSG00000082548	3	36593724	36593975
Gm12376	ENSMUSG00000084027	3	36723274	36723880
Acad9	ENSMUSG00000027710	3	35964901	35993866
D3Ertd254e	ENSMUSG00000033883	3	36058444	36065142
Qrfpr	ENSMUSG00000058400	3	36078346	36121197
Anxa5	ENSMUSG00000027712	3	36347847	36374765
1810062G17Rik	ENSMUSG00000027713	3	36375057	36380898
Exosc9	ENSMUSG00000027714	3	36451528	36464651
Ccna2	ENSMUSG00000027715	3	36463788	36471072
Bbs7	ENSMUSG00000037325	3	36472064	36512399
Trpc3	ENSMUSG00000027716	3	36519404	36589089
C230034O21Rik	ENSMUSG00000086181	3	38773492	38787181
Gm9845	ENSMUSG00000050533	3	39257180	39257827
Rpl21-ps10	ENSMUSG00000064315	3	38006330	38006877
Ankrd50	ENSMUSG00000044864	3	38348183	38383766
Fat4	ENSMUSG00000046743	3	38785862	38910907
SNORA17	ENSMUSG00000089520	3	39698554	39698638
n-R5s195	ENSMUSG00000064825	3	39534886	39535004
AC162799.1	ENSMUSG00000092986	3	38166760	38167006
U1	ENSMUSG00000065945	3	39565210	39565369
AC114901.1	ENSMUSG00000076385	3	38457031	38457136
D3Ertd751e	ENSMUSG00000025766	3	41546533	41563311
C430002E04Rik	ENSMUSG00000091878	3	41292726	41297114
Larp1b	ENSMUSG00000037814	3	40754553	40781715
Larp1b	ENSMUSG00000025762	3	40825861	40844156
Pgrmc2	ENSMUSG00000049940	3	40870248	40886968
Gm16508	ENSMUSG00000078233	3	41089983	41094512
Phf17	ENSMUSG00000025764	3	41359656	41420784
Sclt1	ENSMUSG00000059834	3	41430639	41546436
U1	ENSMUSG00000064927	3	40796615	40796772
SNORD22	ENSMUSG00000089350	3	41245265	41245389
7SK	ENSMUSG00000089251	3	43729491	43729786
Gm10356	ENSMUSG00000072387	3	46854304	46855563
Pcdh10	ENSMUSG00000049100	3	45182320	45238488
Pabpc4l	ENSMUSG00000090919	3	46246119	46251863
2610316D01Rik	ENSMUSG00000086101	3	45084362	45182182
U1	ENSMUSG00000064579	3	45621658	45621820
U6	ENSMUSG00000089584	3	45782500	45782617
SNORA17	ENSMUSG00000077256	3	46093755	46093886
Mbnl1	ENSMUSG00000027763	3	60277032	60433670
Gm8325	ENSMUSG00000027694	3	60680934	60682761
P2ry1	ENSMUSG00000027765	3	60806717	60812901
B430305J03Rik	ENSMUSG00000053706	3	61166172	61169873
Rap2b	ENSMUSG00000036894	3	61168429	61172625
Arhgef26	ENSMUSG00000036885	3	62142266	62266143
U7	ENSMUSG00000089032	3	61207710	61207757
Palmd	ENSMUSG00000033377	3	116621174	116671905
4930455H04Rik	ENSMUSG00000080907	3	116671185	116687324
1700061I17Rik	ENSMUSG00000028009	3	116763440	116780683
D3Bwg0562e	ENSMUSG00000044667	3	117022063	117063794
4833424O15Rik	ENSMUSG00000033342	3	117278145	117392425
Snx7	ENSMUSG00000028007	3	117484415	117571854
Dpyd	ENSMUSG00000033308	3	118265047	119135836
AC165162.1	ENSMUSG00000092666	3	117025859	117025923
AC122183.1	ENSMUSG00000093000	3	118137639	118137748
AC115933.1	ENSMUSG00000093054	3	117551471	117551570
Mir137	ENSMUSG00000065569	3	118136761	118136862
snoCD11	ENSMUSG00000089572	3	119038815	119038884
Epha7	ENSMUSG00000028289	4	28740281	28894649
Gm11910	ENSMUSG00000084073	4	28518803	28519721
Tpm3-rs2	ENSMUSG00000080175	4	27923730	27924052
Gm11911	ENSMUSG00000082977	4	27994324	27995346
Gm11907	ENSMUSG00000082703	4	28280933	28281939
Gm11908	ENSMUSG00000082359	4	28413262	28413608
Gm11909	ENSMUSG00000081579	4	28487098	28487856
Gm11912	ENSMUSG00000083214	4	28519726	28519989
Gm11913	ENSMUSG00000081011	4	28539476	28539892
Gm11915	ENSMUSG00000086774	4	28741447	28742226
Gm11917	ENSMUSG00000087316	4	28995229	29015961
Gm11916	ENSMUSG00000086339	4	29017755	29018812
Gm11918	ENSMUSG00000080911	4	29053096	29053274
Gm11919	ENSMUSG00000082486	4	29122670	29123390
Gm11923	ENSMUSG00000082058	4	29417306	29417813
SNORA17	ENSMUSG00000077521	4	28292466	28292594
Gm11925	ENSMUSG00000080771	4	30120797	30121331
Gm11924	ENSMUSG00000087180	4	30359262	30450933
4930556G01Rik	ENSMUSG00000085522	4	30591746	30723813
Gm11920	ENSMUSG00000082949	4	30629123	30629685
Gm11921	ENSMUSG00000084402	4	30694720	30695039
Gm11922	ENSMUSG00000082254	4	31307622	31308096
BX255946.1	ENSMUSG00000076428	4	30629099	30629207
U6	ENSMUSG00000065053	4	31102059	31102162
Map3k7	ENSMUSG00000028284	4	32051072	32110442
Gm11926	ENSMUSG00000084201	4	32077832	32078261
U4	ENSMUSG00000084440	4	32085599	32085716
Gm11927	ENSMUSG00000082398	4	32138713	32139889
Raver2	ENSMUSG00000035275	4	100741588	100824975
Jak1	ENSMUSG00000028530	4	100824972	100937887
Ak4	ENSMUSG00000028527	4	101091882	101140376
Dnajc6	ENSMUSG00000028528	4	101169253	101315404
Leprot	ENSMUSG00000035212	4	101320323	101331969
Lepr	ENSMUSG00000057722	4	101390009	101487957
B020004J07Rik	ENSMUSG00000035201	4	101507574	101516628
C130073F10Rik	ENSMUSG00000046133	4	101562625	101566394
Gm12800	ENSMUSG00000037028	4	101581726	101584513
Gm12794	ENSMUSG00000070890	4	101613012	101615788
Gm12790	ENSMUSG00000078626	4	101640058	101653654
Gm12789	ENSMUSG00000078625	4	101659231	101662836
Pde4b	ENSMUSG00000028525	4	101760148	102279864
Sgip1	ENSMUSG00000028524	4	102413902	102646233
Tctex1d1	ENSMUSG00000028523	4	102658984	102678199
Insl5	ENSMUSG00000066090	4	102690477	102699447
Wdr78	ENSMUSG00000035126	4	102710670	102787160
Mier1	ENSMUSG00000028522	4	102786995	102838359
Gm12785	ENSMUSG00000082928	4	100883021	100883192
Gm12801	ENSMUSG00000085863	4	100956826	100957808
Gm12796	ENSMUSG00000085721	4	100965019	100994350
Gm12793	ENSMUSG00000081621	4	101013962	101014253
E130102H24Rik	ENSMUSG00000086782	4	101019136	101028853
0610043K17Rik	ENSMUSG00000087361	4	101026388	101071786
Gm12795	ENSMUSG00000083614	4	101034782	101035495
Gm12798	ENSMUSG00000084758	4	101075686	101080461
Gm12791	ENSMUSG00000081121	4	101547952	101548606
Gm12797	ENSMUSG00000081045	4	101556645	101556917
Gm12792	ENSMUSG00000084208	4	101568569	101569587
Gm12799	ENSMUSG00000082264	4	101719173	101721732
Gm12709	ENSMUSG00000085181	4	102639871	102662360
BB031773	ENSMUSG00000085041	4	102676711	102684570
Gm12710	ENSMUSG00000080744	4	102776132	102776347
U6	ENSMUSG00000077677	4	100859369	100859472
7SK	ENSMUSG00000089446	4	101227700	101227973
SNORA17	ENSMUSG00000077260	4	102409417	102409544
Mir101a	ENSMUSG00000065451	4	101019550	101019632
U1	ENSMUSG00000065279	4	100943748	100943911
Slc35d1	ENSMUSG00000028521	4	102843254	102887769
4921539E11Rik	ENSMUSG00000028520	4	102903050	102963468
Oma1	ENSMUSG00000035069	4	102986417	103044473
4930456L15Rik	ENSMUSG00000078618	4	102963564	102984437
Gm12718	ENSMUSG00000086136	4	103055105	103164645
AL772393.1	ENSMUSG00000093326	4	103144464	103144564
Gm10963	ENSMUSG00000078617	4	103229694	103245771
Gm12720	ENSMUSG00000087482	4	103211450	103223287
Gm12716	ENSMUSG00000081584	4	103215979	103217332
Gm12715	ENSMUSG00000059195	4	103235929	103237833
Dab1	ENSMUSG00000028519	4	103291964	104417449
Gm12719	ENSMUSG00000080913	4	103611906	103612146
Gm12717	ENSMUSG00000081696	4	103613568	103614546
SNORA66	ENSMUSG00000077514	4	103258877	103259005
Cbfa2t2-ps1	ENSMUSG00000087034	5	60622721	60623437
U6	ENSMUSG00000088048	5	60892072	60892179
SNORA17	ENSMUSG00000077555	5	61108556	61108678
G6pd2	ENSMUSG00000089992	5	62200082	62201716
SNORA17	ENSMUSG00000077228	5	62523592	62523723
Arap2	ENSMUSG00000037999	5	62993684	63157437
Gm17384	ENSMUSG00000090326	5	63205062	63279547
SNORA17	ENSMUSG00000077286	5	62914647	62914778
Klk5	ENSMUSG00000074155	7	51097639	51106551
Klk4	ENSMUSG00000006948	7	51136530	51141174
Klk15	ENSMUSG00000055193	7	51189141	51194960
Klk1b7-ps	ENSMUSG00000060161	7	51200382	51201297
Klk1b8	ENSMUSG00000063089	7	51206034	51210311
Klk1b1	ENSMUSG00000063133	7	51222121	51226688
Klk1b9	ENSMUSG00000059042	7	51231431	51235746
Klk1b11	ENSMUSG00000044485	7	51251247	51255245
Klk1b26	ENSMUSG00000053719	7	51268048	51272335
Klk1b27	ENSMUSG00000063177	7	51307660	51312075
Klk1b21	ENSMUSG00000066516	7	51357662	51361944
Klk1b22	ENSMUSG00000060177	7	51368043	51372292
Klk1b16	ENSMUSG00000038968	7	51392137	51396977
Klk1b24	ENSMUSG00000063713	7	51443606	51447822
Klk1b3	ENSMUSG00000066515	7	51453561	51457721
Klk1b4	ENSMUSG00000066513	7	51462805	51467124
Klk1b5	ENSMUSG00000066512	7	51471844	51476073
Gm10109	ENSMUSG00000062073	7	51476819	51482791
Klk1	ENSMUSG00000063903	7	51480807	51484987
1700028J19Rik	ENSMUSG00000038782	7	51485303	51491492
2410002F23Rik	ENSMUSG00000045411	7	51502092	51518090
Acpt	ENSMUSG00000012777	7	51507518	51512748
Clec11a	ENSMUSG00000004473	7	51559140	51562329
Shank1	ENSMUSG00000038738	7	51565623	51613721
1700008O03Rik	ENSMUSG00000008028	7	51615413	51641190
Syt3	ENSMUSG00000030731	7	51639472	51655557
Lrrc4b	ENSMUSG00000047085	7	51684388	51718721
Aspdh	ENSMUSG00000038704	7	51720761	51723127
Josd2	ENSMUSG00000038695	7	51723350	51727022
2310044H10Rik	ENSMUSG00000008140	7	51745307	51751899
Fam71e1	ENSMUSG00000051113	7	51751958	51756856
Mybpc2	ENSMUSG00000038670	7	51757088	51780039
Spib	ENSMUSG00000008193	7	51781365	51787441
Pold1	ENSMUSG00000038644	7	51788116	51804219
Nr1h2	ENSMUSG00000060601	7	51804986	51809321
Napsa	ENSMUSG00000002204	7	51827802	51842232
Kcnc3	ENSMUSG00000062785	7	51846034	51860124
Myh14	ENSMUSG00000030739	7	51861173	51926213
2310016G11Rik	ENSMUSG00000070574	7	51932335	51933605
Izumo2	ENSMUSG00000066500	7	51964113	51975212
Zfp473	ENSMUSG00000048012	7	51986851	52006420
Vrk3	ENSMUSG00000002205	7	52003783	52032885
Atf5	ENSMUSG00000038539	7	52067627	52072028
Nup62	ENSMUSG00000043858	7	52071458	52086179
Il4i1	ENSMUSG00000074141	7	52071740	52096179
Tbc1d17	ENSMUSG00000038520	7	52096271	52104449
Akt1s1	ENSMUSG00000011096	7	52104361	52110788
Pnkp	ENSMUSG00000002963	7	52112509	52118295
Ptov1	ENSMUSG00000038502	7	52118438	52125158
Med25	ENSMUSG00000002968	7	52134761	52147779
Fuz	ENSMUSG00000011658	7	52151449	52158001
Ap2a1	ENSMUSG00000060279	7	52155743	52184866
Tsks	ENSMUSG00000059891	7	52198592	52213405
Cpt1c	ENSMUSG00000007783	7	52214743	52230184
Prmt1	ENSMUSG00000052429	7	52231359	52241862
Bcl2l12	ENSMUSG00000003190	7	52246592	52254082
Irf3	ENSMUSG00000003184	7	52253018	52258218
Scaf1	ENSMUSG00000038406	7	52258318	52271733
Rras	ENSMUSG00000038387	7	52273348	52277016
Prr12	ENSMUSG00000046574	7	52283077	52308251
Prrg2	ENSMUSG00000007837	7	52308983	52318047
Nosip	ENSMUSG00000003421	7	52317799	52333873
Rcn3	ENSMUSG00000019539	7	52338283	52347591
Fcgrt	ENSMUSG00000003420	7	52348363	52359192
Rps11	ENSMUSG00000003429	7	52377757	52379766
Rpl13a	ENSMUSG00000074129	7	52380928	52391787
Flt3l	ENSMUSG00000089989	7	52386558	52391802
Aldh16a1	ENSMUSG00000007833	7	52396054	52409954
Pih1d1	ENSMUSG00000003423	7	52409673	52415439
Slc17a7	ENSMUSG00000070570	7	52419291	52431508
Pth2	ENSMUSG00000038300	7	52436552	52437208
Ccdc155	ENSMUSG00000038292	7	52438994	52460262
Dkkl1	ENSMUSG00000030792	7	52462895	52467253
Tead2	ENSMUSG00000030796	7	52471123	52489005
Cd37	ENSMUSG00000030798	7	52489002	52494485
1700039E15Rik	ENSMUSG00000070568	7	52532883	52544368
Trpm4	ENSMUSG00000038260	7	52558002	52589150
Hrc	ENSMUSG00000038239	7	52590660	52594343
Ppfia3	ENSMUSG00000003863	7	52594496	52622389
Lin7b	ENSMUSG00000003872	7	52623261	52625953
Snrnp70	ENSMUSG00000063511	7	52631824	52651062
Kcna7	ENSMUSG00000038201	7	52661330	52666752
Ntf5	ENSMUSG00000074121	7	52669065	52672548
Lhb	ENSMUSG00000038194	7	52673723	52677224
Ruvbl2	ENSMUSG00000003868	7	52677222	52693466
Gys1	ENSMUSG00000003865	7	52690214	52711989
Ftl1	ENSMUSG00000050708	7	52713314	52715254
Bax	ENSMUSG00000003873	7	52717065	52722268
Dhdh	ENSMUSG00000011382	7	52728326	52744175
Tulp2	ENSMUSG00000023467	7	52741632	52779002
Nucb1	ENSMUSG00000030824	7	52748244	52765776
Ppp1r15a	ENSMUSG00000040435	7	52778286	52781638
Plekha4	ENSMUSG00000040428	7	52781700	52809599
Hsd17b14	ENSMUSG00000030825	7	52810263	52823122
Bcat2	ENSMUSG00000030826	7	52825523	52845080
Fgf21	ENSMUSG00000030827	7	52869277	52870860
Fut1	ENSMUSG00000008461	7	52872976	52876429
Izumo1	ENSMUSG00000064158	7	52877181	52884193
Rasip1	ENSMUSG00000044562	7	52882858	52894463
Mamstr	ENSMUSG00000042918	7	52895347	52901891
Fut2	ENSMUSG00000055978	7	52903965	52921764
Sec1	ENSMUSG00000040364	7	52933059	52949772
Ntn5	ENSMUSG00000070564	7	52939784	52949924
Car11	ENSMUSG00000003273	7	52955213	52960052
Dbp	ENSMUSG00000059824	7	52960458	52965525
2310002F09Rik	ENSMUSG00000085370	7	50950579	51053315
Klk13	ENSMUSG00000054046	7	50967937	50982128
Klk12	ENSMUSG00000044430	7	51024267	51028946
Klk11	ENSMUSG00000067616	7	51029987	51034628
Klk10	ENSMUSG00000030693	7	51036424	51040780
Gm15517	ENSMUSG00000087376	7	51516841	51517261
Gm15396	ENSMUSG00000087560	7	51835338	51845994
Gm15545	ENSMUSG00000087138	7	52242270	52249967
Rpl14-ps1	ENSMUSG00000046721	7	52580328	52581023
Mtag2	ENSMUSG00000049661	7	52621533	52623318
Mtag2	ENSMUSG00000091510	7	52622603	52623318
Gm16022	ENSMUSG00000085698	7	52805904	52806985
0610005C13Rik	ENSMUSG00000085214	7	52823165	52830697
Gm16047	ENSMUSG00000084882	7	52886034	52888447
Klk6	ENSMUSG00000050063	7	51079869	51087397
Klk9	ENSMUSG00000047884	7	51047261	51052126
Klk8	ENSMUSG00000064023	7	51052947	51059192
Klk7	ENSMUSG00000030713	7	51066814	51071729
Snord88c	ENSMUSG00000080503	7	51505222	51505311
Mir707	ENSMUSG00000076051	7	52105069	52105141
7SK	ENSMUSG00000088439	7	51495118	51495405
Snord34	ENSMUSG00000065878	7	52381971	52382040
Snord33	ENSMUSG00000065628	7	52382234	52382317
AC151602.1	ENSMUSG00000076036	7	52713459	52713567
Mir150	ENSMUSG00000065495	7	52377127	52377191
Snord35b	ENSMUSG00000064767	7	52378395	52378481
SNORA67	ENSMUSG00000084519	7	52643901	52644054
Snord35a	ENSMUSG00000065818	7	52381716	52381805
Snord32a	ENSMUSG00000065219	7	52382752	52382834
SNORD88	ENSMUSG00000080352	7	51503460	51503550
Snord88a	ENSMUSG00000080373	7	51505505	51505594
U6	ENSMUSG00000088281	7	52509823	52509924
SNORD88	ENSMUSG00000080683	7	51505820	51505912
Sphk2	ENSMUSG00000057342	7	52964837	52973372
Rpl18	ENSMUSG00000059070	7	52970827	52976205
Fam83e	ENSMUSG00000054161	7	52976582	52984862
Spaca4	ENSMUSG00000070563	7	52980477	52981186
Sult2b1	ENSMUSG00000003271	7	52985353	53014982
AC167242.1	ENSMUSG00000093121	7	52998694	52998931
Gm5897	ENSMUSG00000074118	7	53038302	53039837
Lmtk3	ENSMUSG00000062044	7	53039108	53059514
Cyth2	ENSMUSG00000003269	7	53062007	53069951
Kcnj14	ENSMUSG00000058743	7	53071837	53080117
Grwd1	ENSMUSG00000053801	7	53080597	53086314
Grin2d	ENSMUSG00000002771	7	53087253	53126298
Kdelr1	ENSMUSG00000002778	7	53128142	53139101
Syngr4	ENSMUSG00000040231	7	53140592	53152084
Tmem143	ENSMUSG00000002781	7	53152311	53172783
U4	ENSMUSG00000088555	7	53130917	53131001
Emp3	ENSMUSG00000040212	7	53173393	53176796
Ccdc114	ENSMUSG00000040189	7	53179442	53204326
Abcc6	ENSMUSG00000030834	7	53231750	53285672
Nomo1	ENSMUSG00000030835	7	53289066	53339582
Kcnj11	ENSMUSG00000070561	7	53352533	53355607
Abcc8	ENSMUSG00000040136	7	53359893	53435403
Ush1c	ENSMUSG00000030838	7	53450720	53493873
Otog	ENSMUSG00000009487	7	53496357	53566804
Myod1	ENSMUSG00000009471	7	53631844	53634462
Kcnc1	ENSMUSG00000058975	7	53651867	53693745
Sergef	ENSMUSG00000030839	7	53698538	53895177
Tph1	ENSMUSG00000040046	7	53902500	53927907
Saal1	ENSMUSG00000006763	7	53941478	53966050
Saa3	ENSMUSG00000040026	7	53967368	53971046
Saa4	ENSMUSG00000040017	7	53983387	53987913
Saa1	ENSMUSG00000074115	7	53995871	53998350
Saa2	ENSMUSG00000057465	7	54007203	54009684
Hps5	ENSMUSG00000014418	7	54015836	54051434
Gtf2h1	ENSMUSG00000006599	7	54051473	54079170
Gm5331	ENSMUSG00000090468	7	54087834	54088232
Ldha	ENSMUSG00000063229	7	54096845	54110997
Ldhc	ENSMUSG00000030851	7	54116573	54133512
Tsg101	ENSMUSG00000014402	7	54144319	54175339
Uevld	ENSMUSG00000043262	7	54178909	54213897
Gm9999	ENSMUSG00000056509	7	54238988	54243162
Spty2d1	ENSMUSG00000049516	7	54245766	54263781
Tmem86a	ENSMUSG00000010307	7	54306010	54310146
Ptpn5	ENSMUSG00000030854	7	54333168	54389054
Mrgpra6	ENSMUSG00000052303	7	54441087	54444786
Mrgpra9	ENSMUSG00000074111	7	54490289	54491281
Mrgpra1	ENSMUSG00000050650	7	54590245	54609610
Mrgpra2a	ENSMUSG00000039854	7	54681698	54707534
Mrgpra2b	ENSMUSG00000054040	7	54719176	54784232
Mrgpra3	ENSMUSG00000078698	7	54844320	54856742
Mrgpra4	ENSMUSG00000067173	7	55236164	55237666
Mrgprx1	ENSMUSG00000070552	7	55276341	55282971
Gm15700	ENSMUSG00000087492	7	53816671	53833241
Gm9392	ENSMUSG00000087298	7	54075637	54077418
Gm14377	ENSMUSG00000085186	7	54366221	54381360
U6	ENSMUSG00000075852	7	54669204	54669310
AC131111.1	ENSMUSG00000077110	7	55008092	55008201
U6	ENSMUSG00000065703	7	53705783	53705889
Mrgprb5	ENSMUSG00000070551	7	55423353	55424384
Mrgprb4	ENSMUSG00000070550	7	55453583	55454548
Mrgprb8	ENSMUSG00000050870	7	55643896	55645018
Mrgprb1	ENSMUSG00000070547	7	55699483	55711712
Mrgprx2	ENSMUSG00000074109	7	55733989	55754640
Mrgprb2	ENSMUSG00000050425	7	55806338	55813456
Mrgprb3	ENSMUSG00000070546	7	55898233	55899171
Zdhhc13	ENSMUSG00000030471	7	56044373	56082810
Csrp3	ENSMUSG00000030470	7	56085768	56103400
E2f8	ENSMUSG00000046179	7	56121799	56136966
Gm2788	ENSMUSG00000085995	7	56133328	56141978
Nav2	ENSMUSG00000052512	7	56501559	56865457
Dbx1	ENSMUSG00000030507	7	56886869	56892219
Htatip2	ENSMUSG00000039745	7	57014476	57029369
Prmt3	ENSMUSG00000030505	7	57033716	57113635
Gm17464	ENSMUSG00000091622	7	57111532	57112970
Slc6a5	ENSMUSG00000039728	7	57165516	57219226
Nell1	ENSMUSG00000055409	7	57230234	58120625
1700081H22Rik	ENSMUSG00000085265	7	57772679	57831341
4933405O20Rik	ENSMUSG00000084234	7	57854714	57855690
Gm9343	ENSMUSG00000070541	7	58198129	58198524
Gm16478	ENSMUSG00000090443	7	58425887	58426282
Cyfip1	ENSMUSG00000030447	7	63097115	63186070
Gm5776	ENSMUSG00000078525	7	61667279	61667889
Gm17907	ENSMUSG00000092526	7	63157972	63158681
A230056P14Rik	ENSMUSG00000087178	7	63217901	63236238
Nipa2	ENSMUSG00000030452	7	63186657	63217846
Nipa1	ENSMUSG00000047037	7	63232937	63275324
Gm15887	ENSMUSG00000078087	7	63269303	63269797
Luzp2	ENSMUSG00000063297	7	62091329	62520736
Siglech	ENSMUSG00000051504	7	63023548	63034295
Tubgcp5	ENSMUSG00000033790	7	63049518	63086817
Gm15888	ENSMUSG00000085927	7	63235297	63236220
U6	ENSMUSG00000077163	7	62499303	62499409
U7	ENSMUSG00000088640	7	62957524	62957585
AC160534.1	ENSMUSG00000092969	7	63045954	63046063
AC099728.1	ENSMUSG00000092856	7	61468537	61468741
Herc2	ENSMUSG00000030451	7	63305525	63487164
Oca2	ENSMUSG00000030450	7	63495130	63791887
Gabrg3	ENSMUSG00000055026	7	63971835	64642558
Gm1153	ENSMUSG00000091137	8	57977384	57977890
Gm7349	ENSMUSG00000091349	8	57980773	57981279
Gm7354	ENSMUSG00000091173	8	57984192	57984698
Gm17293	ENSMUSG00000091502	8	57987540	57988046
Gm7360	ENSMUSG00000090390	8	57990965	57991471
Adam29	ENSMUSG00000046258	8	58349709	58385745
Glra3	ENSMUSG00000038257	8	58419257	58604226
Hpgd	ENSMUSG00000031613	8	58773349	58799843
BC088983	ENSMUSG00000038215	8	59010319	59029844
Fbxo8	ENSMUSG00000038206	8	59029887	59071190
Hand2	ENSMUSG00000038193	8	59799780	59803314
5033428I22Rik	ENSMUSG00000085268	8	59810915	59819479
SNORA17	ENSMUSG00000077585	8	59000169	59000300
AC148768.1	ENSMUSG00000092881	8	57961710	57961810
AC116121.1	ENSMUSG00000076392	8	59040098	59040206
Scrg1	ENSMUSG00000031610	8	59934720	59956382
Sap30	ENSMUSG00000031609	8	59961504	59966657
Hmgb2	ENSMUSG00000054717	8	59990640	59994796
Galnt7	ENSMUSG00000031608	8	60002625	60131829
2500002B13Rik	ENSMUSG00000086276	8	59966851	59987674
Gm10284	ENSMUSG00000070025	8	60029049	60030280
SNORA65	ENSMUSG00000077526	8	60028572	60028685
Galntl6	ENSMUSG00000061864	8	60255979	61390424
Mon1b	ENSMUSG00000078908	8	116159850	116166305
Syce1l	ENSMUSG00000033409	8	116167113	116179433
Adamts18	ENSMUSG00000053399	8	116221026	116372641
Nudt7	ENSMUSG00000031767	8	116657457	116676212
Vat1l	ENSMUSG00000046844	8	116729512	116897971
Clec3a	ENSMUSG00000008874	8	116941986	116949746
Wwox	ENSMUSG00000004637	8	116963555	117876608
4933408N05Rik	ENSMUSG00000084848	8	116865060	116875379
Gm16116	ENSMUSG00000090217	8	117115203	117118800
Gm16117	ENSMUSG00000089723	8	117163446	117166014
Gm16118	ENSMUSG00000089797	8	117222339	117231906
U6	ENSMUSG00000065090	8	118115070	118115173
5S_rRNA	ENSMUSG00000088428	8	117576714	117576813
Maf	ENSMUSG00000055435	8	118206842	118231694
Gm15655	ENSMUSG00000086717	8	118228978	118231133
Tpt1-ps5	ENSMUSG00000059252	9	37504100	37504618
Olfr892-ps1	ENSMUSG00000058521	9	37997312	37998237
Olfr908	ENSMUSG00000063732	9	38323619	38324550
Olfr151	ENSMUSG00000061165	9	37518857	37538646
Olfr874	ENSMUSG00000063350	9	37553721	37554727
Olfr875	ENSMUSG00000058628	9	37580222	37581225
Olfr876	ENSMUSG00000066750	9	37611474	37612521
Olfr877	ENSMUSG00000066749	9	37662405	37663340
Olfr145	ENSMUSG00000066748	9	37704910	37705960
Olfr878	ENSMUSG00000066747	9	37726133	37727197
Olfr881	ENSMUSG00000060583	9	37800077	37801024
Olfr883	ENSMUSG00000062841	9	37833393	37834322
Olfr884	ENSMUSG00000058130	9	37854809	37855895
Olfr885	ENSMUSG00000057029	9	37868907	37869836
Olfr887	ENSMUSG00000059942	9	37892423	37893352
Olfr888	ENSMUSG00000059275	9	37916273	37917217
Olfr889	ENSMUSG00000062211	9	37923277	37924312
Olfr890	ENSMUSG00000061096	9	37950722	37951666
Olfr891	ENSMUSG00000045528	9	37987456	37988406
Olfr893	ENSMUSG00000070312	9	38016637	38017578
Olfr894	ENSMUSG00000070311	9	38026403	38027351
Olfr143	ENSMUSG00000070310	9	38061004	38061945
Olfr895	ENSMUSG00000070309	9	38076100	38077050
Olfr25	ENSMUSG00000058270	9	38137077	38138144
Olfr898	ENSMUSG00000060101	9	38156670	38157620
Olfr250	ENSMUSG00000049864	9	38175133	38176128
Olfr251	ENSMUSG00000062388	9	38185468	38186418
Olfr147	ENSMUSG00000049098	9	38209305	38211414
Olfr901	ENSMUSG00000052058	9	38237869	38238804
Olfr902	ENSMUSG00000049334	9	38256377	38257432
Olfr904	ENSMUSG00000051620	9	38271628	38272560
Olfr905	ENSMUSG00000046455	9	38280334	38281266
Olfr906	ENSMUSG00000039962	9	38295616	38296551
Olfr907	ENSMUSG00000045066	9	38306256	38307188
Olfr911-ps1	ENSMUSG00000062621	9	38331315	38332254
Olfr910	ENSMUSG00000057444	9	38345467	38347414
Olfr912	ENSMUSG00000060114	9	38387829	38389796
Olfr913	ENSMUSG00000059189	9	38400388	38402746
Olfr914	ENSMUSG00000047050	9	38414052	38415002
Olfr916	ENSMUSG00000064113	9	38465043	38465975
Olfr917	ENSMUSG00000063225	9	38472498	38473427
Olfr918	ENSMUSG00000046150	9	38480089	38481066
Olfr919	ENSMUSG00000056961	9	38505014	38505961
Vwa5a	ENSMUSG00000023186	9	38525853	38550922
Olfr920	ENSMUSG00000061039	9	38560381	38564448
Olfr921	ENSMUSG00000049926	9	38580673	38583939
Olfr922	ENSMUSG00000043911	9	38622993	38624124
Olfr923	ENSMUSG00000044798	9	38635200	38636267
Olfr924	ENSMUSG00000062103	9	38655701	38656627
Olfr26	ENSMUSG00000047667	9	38662645	38663575
Olfr926	ENSMUSG00000064333	9	38684711	38685761
Olfr930	ENSMUSG00000063221	9	38737676	38738774
Olfr933	ENSMUSG00000058515	9	38783236	38784238
Olfr934	ENSMUSG00000057424	9	38789695	38790627
Olfr935	ENSMUSG00000059595	9	38802092	38803018
Olfr146	ENSMUSG00000058820	9	38826144	38827204
Olfr937	ENSMUSG00000047724	9	38867314	38868249
Olfr938	ENSMUSG00000048501	9	38885283	38886401
Olfr27	ENSMUSG00000049708	9	38935752	38952657
Olfr943	ENSMUSG00000062149	9	38991765	38992709
Olfr944	ENSMUSG00000060905	9	39024944	39025879
Olfr1537-ps1	ENSMUSG00000063670	9	39045072	39046016
Olfr945	ENSMUSG00000063380	9	39065305	39066267
Olfr948	ENSMUSG00000057349	9	39126232	39127197
Olfr951	ENSMUSG00000060129	9	39201378	39202322
Olfr952	ENSMUSG00000058856	9	39233678	39234733
Olfr954	ENSMUSG00000064173	9	39269018	39269962
Olfr955	ENSMUSG00000063176	9	39277365	39278309
Olfr44	ENSMUSG00000062649	9	39291789	39301573
Olfr957	ENSMUSG00000042949	9	39318368	39319303
Olfr958	ENSMUSG00000050853	9	39357513	39358454
Olfr959	ENSMUSG00000059366	9	39379845	39380899
AW551984	ENSMUSG00000038112	9	39394981	39411988
Olfr148	ENSMUSG00000048299	9	39421129	39422145
Olfr960	ENSMUSG00000059867	9	39430690	39431756
Olfr961	ENSMUSG00000059106	9	39454309	39455257
Olfr963	ENSMUSG00000064110	9	39476644	39477579
SNORA17	ENSMUSG00000077240	9	38318758	38318881
U2	ENSMUSG00000065620	9	37630171	37630369
CT025680.1	ENSMUSG00000078003	9	38856143	38856234
SNORA17	ENSMUSG00000077427	9	39345411	39345537
SNORD19	ENSMUSG00000088866	9	39406713	39406772
AC073947.1	ENSMUSG00000093152	9	38882996	38883079
Olfr964-ps1	ENSMUSG00000044107	9	39493629	39494527
Olfr149	ENSMUSG00000062121	9	39509378	39510407
Olfr965	ENSMUSG00000055636	9	39526814	39527752
Olfr150	ENSMUSG00000058652	9	39544402	39545340
Olfr967	ENSMUSG00000055820	9	39557973	39558905
Olfr968	ENSMUSG00000058532	9	39579439	39580383
Olfr969	ENSMUSG00000063359	9	39602962	39603897
Olfr970	ENSMUSG00000063657	9	39627226	39628161
Olfr971	ENSMUSG00000061686	9	39647021	39647944
Olfr972	ENSMUSG00000058827	9	39680862	39681806
Olfr229	ENSMUSG00000060107	9	39717390	39718313
Olfr974	ENSMUSG00000051493	9	39749800	39750879
Olfr975	ENSMUSG00000043331	9	39757422	39758354
Olfr976	ENSMUSG00000047352	9	39762343	39764554
Olfr978	ENSMUSG00000044292	9	39801397	39802332
Olfr979	ENSMUSG00000059473	9	39807791	39808835
Olfr980	ENSMUSG00000060254	9	39813528	39814532
Olfr981	ENSMUSG00000046678	9	39829937	39830933
1700001J11Rik	ENSMUSG00000066639	9	39858208	39860496
Olfr982	ENSMUSG00000049010	9	39881882	39882847
Olfr983	ENSMUSG00000044205	9	39899602	39901143
Olfr984	ENSMUSG00000045812	9	39908129	39909073
Olfr985	ENSMUSG00000049073	9	39934509	39935624
Tmem225	ENSMUSG00000040541	9	39955707	39958465
Gm4893	ENSMUSG00000070308	9	39972215	39972544
Olfr986	ENSMUSG00000051095	9	39994664	39995679
Zfp202	ENSMUSG00000025602	9	39999901	40021189
AC136021.1	ENSMUSG00000093182	9	40010934	40011250
Scn3b	ENSMUSG00000049281	9	40076801	40099203
2810417H13Rik	ENSMUSG00000040204	9	65738044	65751073
Csnk1g1	ENSMUSG00000032384	9	65756781	65892816
Ppib	ENSMUSG00000032383	9	65907976	65914436
Snx22	ENSMUSG00000039452	9	65912983	65917538
Snx1	ENSMUSG00000032382	9	65935940	65974394
Fam96a	ENSMUSG00000032381	9	65974418	65986762
Dapk2	ENSMUSG00000032380	9	66006030	66120049
Herc1	ENSMUSG00000038664	9	66198257	66356582
Fbxl22	ENSMUSG00000050503	9	66356266	66362400
Usp3	ENSMUSG00000032376	9	66362444	66440949
Gm16218	ENSMUSG00000059571	9	65145339	65145726
Kbtbd13	ENSMUSG00000054978	9	65237944	65239459
Oaz2	ENSMUSG00000040652	9	65515808	65538107
Gm16073	ENSMUSG00000079915	9	65685974	65686490
Gm15563	ENSMUSG00000086387	9	66419808	66429866
Plekho2	ENSMUSG00000050721	9	65402193	65427847
Ptplad1	ENSMUSG00000033629	9	64834792	64869524
Clpx	ENSMUSG00000015357	9	65142067	65178465
Pdcd7	ENSMUSG00000041837	9	65193875	65207450
Gm514	ENSMUSG00000086228	9	65208867	65228184
Rasl12	ENSMUSG00000041696	9	65246295	65262660
Ostb	ENSMUSG00000053862	9	65260560	65270580
Mtfmt	ENSMUSG00000059183	9	65283589	65300861
Spg21	ENSMUSG00000032388	9	65308744	65336277
Ankdd1a	ENSMUSG00000066510	9	65349260	65364806
Rab11a	ENSMUSG00000004771	9	64563106	64585565
2010321M09Rik	ENSMUSG00000034263	9	64808639	64834781
Parp16	ENSMUSG00000032392	9	65062497	65087026
Cilp	ENSMUSG00000042254	9	65112987	65128413
Rbpms2	ENSMUSG00000032387	9	65477455	65508335
Zfp609	ENSMUSG00000040524	9	65539391	65675371
Trip4	ENSMUSG00000032386	9	65678943	65756601
Igdcc3	ENSMUSG00000032394	9	64988961	65033664
Dennd4a	ENSMUSG00000053641	9	64659147	64767474
Dpp8	ENSMUSG00000032393	9	64880265	64930457
Igdcc4	ENSMUSG00000032816	9	64949293	64985747
Slc24a1	ENSMUSG00000034452	9	64770668	64799414
Pif1	ENSMUSG00000041064	9	65434967	65443774
Megf11	ENSMUSG00000036466	9	64233433	64557012
SNORA17	ENSMUSG00000077385	9	65800121	65800252
AC110235.1	ENSMUSG00000093316	9	65181085	65181318
U5	ENSMUSG00000075930	9	65049533	65049648
n-R5s85	ENSMUSG00000065387	9	65684160	65684272
U6	ENSMUSG00000065301	9	65748008	65748115
U5	ENSMUSG00000075763	9	65044379	65044494
AC122463.1	ENSMUSG00000093119	9	64819476	64819600
U6	ENSMUSG00000084437	9	66208448	66208549
AC161366.1	ENSMUSG00000089574	9	64989093	64989163
SNORA17	ENSMUSG00000089336	9	64729591	64729732
Car12	ENSMUSG00000032373	9	66561493	66614652
Aph1b	ENSMUSG00000032375	9	66623009	66643297
Gm10647	ENSMUSG00000074232	9	66644846	66646881
BC050972	ENSMUSG00000092131	9	66646485	66652166
Ppp1r2-ps4	ENSMUSG00000059237	9	66653113	66653745
Aph1c	ENSMUSG00000053040	9	66662801	66682533
Gm17098	ENSMUSG00000091745	9	66682506	66683341
Rab8b	ENSMUSG00000036943	9	66691479	66767512
Rps27l	ENSMUSG00000036781	9	66793893	66797323
Lactb	ENSMUSG00000032370	9	66803200	66823291
Tpm1	ENSMUSG00000032366	9	66870397	66897213
U6	ENSMUSG00000089450	9	66828895	66828992
U1	ENSMUSG00000088021	9	66952015	66952162
Tln2	ENSMUSG00000052698	9	67064894	67407510
Mir190	ENSMUSG00000076379	9	67084458	67084542
Gm7628	ENSMUSG00000025644	9	108996358	109000310
3000002C10Rik	ENSMUSG00000070282	9	109730457	109735220
Mtap4	ENSMUSG00000047011	9	109939793	109942971
Col7a1	ENSMUSG00000025650	9	108855631	108886920
Ucn2	ENSMUSG00000049699	9	108888208	108889209
Pfkfb4	ENSMUSG00000025648	9	108893947	108934737
Shisa5	ENSMUSG00000025647	9	108941079	108960238
Trex1	ENSMUSG00000049734	9	108960447	108962852
Atrip	ENSMUSG00000025646	9	108960447	108976638
Ccdc72	ENSMUSG00000091537	9	108980502	108984895
Ccdc51	ENSMUSG00000025645	9	108985008	108995877
Plxnb1	ENSMUSG00000053646	9	108997950	109022425
Fbxw21	ENSMUSG00000047237	9	109041968	109064555
Fbxw13	ENSMUSG00000049314	9	109081741	109098489
Fbxw20	ENSMUSG00000061701	9	109119946	109137268
Fbxw14	ENSMUSG00000054087	9	109173350	109190190
Fbxw28	ENSMUSG00000079284	9	109225400	109242173
Fbxw22	ENSMUSG00000070324	9	109280925	109306810
Fbxw16	ENSMUSG00000074062	9	109334833	109351654
Fbxw19	ENSMUSG00000074061	9	109381084	109398389
Fbxw15	ENSMUSG00000074060	9	109455118	109470776
Fbxw24	ENSMUSG00000062275	9	109503631	109528571
Fbxw18	ENSMUSG00000074059	9	109579248	109605214
Fbxw26	ENSMUSG00000059547	9	109620080	109648603
Spink8	ENSMUSG00000050074	9	109714794	109729147
Nme6	ENSMUSG00000032478	9	109735263	109745630
Camp	ENSMUSG00000038357	9	109749889	109751970
Cdc25a	ENSMUSG00000032477	9	109778083	109796392
Mtap4	ENSMUSG00000032479	9	109833962	109986451
Dhx30	ENSMUSG00000032480	9	109986824	110020334
Gm10615	ENSMUSG00000074056	9	110020207	110022420
Smarcc1	ENSMUSG00000032481	9	110034541	110142682
Cspg5	ENSMUSG00000032482	9	110146287	110165079
2610002I17Rik	ENSMUSG00000054836	9	110207696	110224596
Scap	ENSMUSG00000032485	9	110235792	110287450
5830462I19Rik	ENSMUSG00000091102	9	110274552	110277934
Ptpn23	ENSMUSG00000036057	9	110287593	110310714
Ngp	ENSMUSG00000032484	9	110322254	110325514
Klhl18	ENSMUSG00000054792	9	110328431	110379198
Kif9	ENSMUSG00000032489	9	110379462	110427683
Setd2	ENSMUSG00000044791	9	110435101	110521137
Nradd	ENSMUSG00000032491	9	110523641	110526897
Nbeal2	ENSMUSG00000056724	9	110527293	110556665
Ccdc12	ENSMUSG00000019659	9	110559007	110614094
Pth1r	ENSMUSG00000032492	9	110624592	110649649
Myl3	ENSMUSG00000059741	9	110666150	110672308
Prss42	ENSMUSG00000044664	9	110700670	110706240
Prss44	ENSMUSG00000032493	9	110716498	110727027
Prss43	ENSMUSG00000058398	9	110729194	110734006
Prss45	ENSMUSG00000047257	9	110737092	110743817
Prss46	ENSMUSG00000049719	9	110747010	110759026
Prss50	ENSMUSG00000048752	9	110760471	110767132
Tmie	ENSMUSG00000049555	9	110768215	110782617
Als2cl	ENSMUSG00000044037	9	110782374	110803034
Tdgf1	ENSMUSG00000032494	9	110842114	110848662
U6	ENSMUSG00000075737	9	109198056	109198162
AC161246.1	ENSMUSG00000092980	9	109870199	109870494
U6	ENSMUSG00000075913	9	109260743	109260849
Mir711	ENSMUSG00000076142	9	108871967	108872048
SNORA17	ENSMUSG00000064877	9	110024183	110024320
U6	ENSMUSG00000075710	9	109250038	109250144
Lrrc2	ENSMUSG00000032495	9	110854049	110886570
Rtp3	ENSMUSG00000066319	9	110887449	110892217
Gm10030	ENSMUSG00000057802	9	110907315	110909334
Ltf	ENSMUSG00000032496	9	110921796	110945270
Ccrl2	ENSMUSG00000043953	9	110957339	110959774
Lrrfip2	ENSMUSG00000032497	9	111020615	111128172
Mlh1	ENSMUSG00000032498	9	111130732	111174112
7SK	ENSMUSG00000089082	9	111147096	111147371
U7	ENSMUSG00000088296	9	110977898	110977960
Epm2aip1	ENSMUSG00000046785	9	111174349	111181593
Trank1	ENSMUSG00000062296	9	111214243	111298278
Dclk3	ENSMUSG00000032500	9	111341585	111392115
Stac	ENSMUSG00000032502	9	111463941	111592852
n-R5s90	ENSMUSG00000077156	9	111516402	111516519
Gm12153	ENSMUSG00000087172	11	43772591	43948489
Gm12154	ENSMUSG00000086738	11	44079065	44080711
Gm12155	ENSMUSG00000082790	11	44200617	44200776
Gm12157	ENSMUSG00000083521	11	44231451	44232198
Gm12156	ENSMUSG00000082750	11	44292709	44293711
4930597A21Rik	ENSMUSG00000086501	11	44399819	44404731
Ebf1	ENSMUSG00000078561	11	44430819	44431275
Gm12158	ENSMUSG00000085784	11	44473024	44476178
Gm12159	ENSMUSG00000084773	11	44916368	44930430
Gm12160	ENSMUSG00000087089	11	44974445	45027158
Gm12161	ENSMUSG00000080981	11	45094096	45094456
Gm12162	ENSMUSG00000085476	11	45222544	45282006
Adra1b	ENSMUSG00000050541	11	43588108	43714712
Il12b	ENSMUSG00000004296	11	44213565	44227535
Ublcp1	ENSMUSG00000041231	11	44268073	44284000
Rnf145	ENSMUSG00000019189	11	44332466	44379022
Ebf1	ENSMUSG00000057098	11	44430819	44821593
SNORA17	ENSMUSG00000077320	11	45452885	45453016
AL669944.1	ENSMUSG00000092889	11	44282515	44282568
F630206G17Rik	ENSMUSG00000086686	11	45621589	45654673
Gm12163	ENSMUSG00000083017	11	45627106	45627494
Gm12164	ENSMUSG00000081251	11	45642821	45643371
AL645948.1	ENSMUSG00000076031	11	45643281	45643389
Adamts2	ENSMUSG00000036545	11	50415586	50621075
Zfp354c	ENSMUSG00000044807	11	50624588	50641226
Zfp879	ENSMUSG00000044296	11	50645533	50655054
Grm6	ENSMUSG00000000617	11	50664187	50679710
Zfp454	ENSMUSG00000048728	11	50686222	50701153
Zfp2	ENSMUSG00000049321	11	50712214	50729667
Zfp354b	ENSMUSG00000020335	11	50735325	50745135
4933414I15Rik	ENSMUSG00000072983	11	50754213	50757267
Prop1	ENSMUSG00000044542	11	50764308	50767253
Olfr1378	ENSMUSG00000050343	11	50782522	50783469
Olfr1377	ENSMUSG00000061952	11	50798160	50799222
Olfr51	ENSMUSG00000060918	11	50820476	50821399
Olfr54	ENSMUSG00000059397	11	50840506	50841447
Olfr1375-ps1	ENSMUSG00000057890	11	50861611	50862552
Zfp354a	ENSMUSG00000020364	11	50872759	50886301
9230009I02Rik	ENSMUSG00000072982	11	50898589	50905335
BC049762	ENSMUSG00000045942	11	51067153	51076548
Clk4	ENSMUSG00000020385	11	51075232	51095268
Col23a1	ENSMUSG00000063564	11	51103422	51397420
Agxt2l2	ENSMUSG00000020359	11	51398259	51417991
Hnrnpab	ENSMUSG00000020358	11	51412372	51420349
Nhp2	ENSMUSG00000001056	11	51433237	51437216
Rmnd5b	ENSMUSG00000001054	11	51437173	51449398
N4bp3	ENSMUSG00000001053	11	51456565	51464344
D930048N14Rik	ENSMUSG00000052563	11	51464456	51471183
0610009B22Rik	ENSMUSG00000007777	11	51498888	51502376
Sec24a	ENSMUSG00000036391	11	51505765	51577136
Sar1b	ENSMUSG00000020386	11	51577189	51605427
Phf15	ENSMUSG00000020387	11	51626957	51671155
Cdkn2aipnl	ENSMUSG00000020392	11	51781163	51790836
Ube2b	ENSMUSG00000020390	11	51798999	51814264
Cdkl3	ENSMUSG00000020389	11	51817723	51903286
Ppp2ca	ENSMUSG00000020349	11	51912183	51941280
Olfr1373	ENSMUSG00000062204	11	51958095	51959030
Olfr1371	ENSMUSG00000060170	11	52026552	52027489
Skp1a	ENSMUSG00000036309	11	52045497	52060360
Tcf7	ENSMUSG00000000782	11	52065873	52096681
Vdac1	ENSMUSG00000020402	11	52174362	52202899
9530068E07Rik	ENSMUSG00000036275	11	52209930	52222230
Gm16953	ENSMUSG00000087101	11	51763384	52083016
Gm12198	ENSMUSG00000085564	11	50412800	50415950
Gm12199	ENSMUSG00000087080	11	50531172	50532417
Gm12200	ENSMUSG00000085902	11	50533584	50539046
Gm12660	ENSMUSG00000086226	11	50664834	50666084
4933414I15Rik	ENSMUSG00000051192	11	50755199	50755598
Olfr1379-ps1	ENSMUSG00000083542	11	50772588	50773411
Gm12661	ENSMUSG00000082074	11	50790232	50793566
Olfr1376-ps1	ENSMUSG00000083825	11	50805300	50806197
Gm12202	ENSMUSG00000080918	11	50912513	50926702
Gm12201	ENSMUSG00000083156	11	50920133	50921371
Olfr1374-ps1	ENSMUSG00000083312	11	50956034	50956969
Gm12203	ENSMUSG00000081296	11	50988727	50989324
5133400J02Rik	ENSMUSG00000086646	11	51003335	51033920
Gm12569	ENSMUSG00000061469	11	51046967	51048555
Gm12204	ENSMUSG00000086493	11	51814355	51815413
Gm12205	ENSMUSG00000084800	11	51852352	51852973
Olfr1372-ps1	ENSMUSG00000084141	11	51968880	51969785
Gm12206	ENSMUSG00000083175	11	52002455	52003055
Gm12207	ENSMUSG00000086920	11	52047226	52050121
A630014C17Rik	ENSMUSG00000086395	11	52089557	52099681
Gm12208	ENSMUSG00000080951	11	52218818	52218980
Gm12209	ENSMUSG00000081297	11	52292010	52292605
Gm12210	ENSMUSG00000083129	11	52300660	52300812
Gm17500	ENSMUSG00000092028	11	51938032	51941281
AL645907.1	ENSMUSG00000093734	11	51083937	51084191
AL669920.1	ENSMUSG00000093325	11	51777884	51777991
5S_rRNA	ENSMUSG00000088205	11	50623153	50623265
SNORA48	ENSMUSG00000084744	11	51551281	51551424
AL935177.1	ENSMUSG00000093006	11	51912560	51912655
Mir3061	ENSMUSG00000092870	11	51940248	51940338
Accn1	ENSMUSG00000020704	11	80693671	81781959
5530401A14Rik	ENSMUSG00000020703	11	81674175	81708084
Gm17268	ENSMUSG00000092157	11	81841726	81852064
Ccl2	ENSMUSG00000035385	11	81849073	81850955
Ccl7	ENSMUSG00000035373	11	81859214	81861027
Ccl11	ENSMUSG00000020676	11	81871325	81876457
Ccl12	ENSMUSG00000035352	11	81915347	81916902
Ccl8	ENSMUSG00000009185	11	81928687	81930301
Ccl1	ENSMUSG00000020702	11	81990159	82119192
Tmem132e	ENSMUSG00000020701	11	82202402	82259834
Cct6b	ENSMUSG00000020698	11	82532752	82577823
Zfp830	ENSMUSG00000046010	11	82577847	82581124
Lig3	ENSMUSG00000020697	11	82594610	82617776
Rffl	ENSMUSG00000020696	11	82615951	82684712
Rad51l3	ENSMUSG00000018841	11	82685466	82704116
Fndc8	ENSMUSG00000018844	11	82705626	82714303
Nle1	ENSMUSG00000020692	11	82714270	82721913
Unc45b	ENSMUSG00000018845	11	82724052	82756905
Slfn5	ENSMUSG00000054404	11	82764851	82776443
Slfn9	ENSMUSG00000069793	11	82793131	82805332
Slfn8	ENSMUSG00000035208	11	82815660	82834312
Slfn10-ps	ENSMUSG00000072621	11	82841632	82853544
Slfn2	ENSMUSG00000072620	11	82878614	82884180
Slfn1	ENSMUSG00000078763	11	82930351	82936172
4930527B05Rik	ENSMUSG00000086971	11	81198515	81215993
1700071K01Rik	ENSMUSG00000080980	11	81386157	81386975
Gm11418	ENSMUSG00000087534	11	81400863	81406980
Gm11419	ENSMUSG00000084996	11	81798908	81802271
Gm11426	ENSMUSG00000069796	11	82446855	82449811
Gm11421	ENSMUSG00000083203	11	82538645	82538938
Gm11422	ENSMUSG00000083371	11	82541502	82542604
Gm11420	ENSMUSG00000081828	11	82559306	82559707
Gm11423	ENSMUSG00000085175	11	82593103	82594544
Gm12575	ENSMUSG00000086058	11	82738405	82746884
1700003F17Rik	ENSMUSG00000086327	11	82755843	82774183
Gm11424	ENSMUSG00000082726	11	82784594	82785422
Gm11425	ENSMUSG00000082419	11	82841002	82841499
U6	ENSMUSG00000065201	11	82409575	82409681
Tanc2	ENSMUSG00000053580	11	105451300	105790618
Cyb561	ENSMUSG00000019590	11	105795016	105814650
Ace	ENSMUSG00000020681	11	105829259	105851278
Kcnh6	ENSMUSG00000001901	11	105869438	105895863
Dcaf7	ENSMUSG00000049354	11	105898186	105920638
Taco1	ENSMUSG00000001983	11	105927375	105934926
Map3k3	ENSMUSG00000020700	11	105945927	106016760
Limd2	ENSMUSG00000040699	11	106017570	106022174
Gm10840	ENSMUSG00000075480	11	106022164	106022472
Strada	ENSMUSG00000069631	11	106024644	106063482
Ccdc47	ENSMUSG00000078622	11	106058722	106077658
Ddx42	ENSMUSG00000020705	11	106078240	106110453
Ftsj3	ENSMUSG00000020706	11	106110456	106117393
Psmc5	ENSMUSG00000020708	11	106117468	106124434
Smarcd2	ENSMUSG00000078619	11	106124493	106134286
Tcam1	ENSMUSG00000020712	11	106137986	106150059
Gh	ENSMUSG00000020713	11	106161585	106163179
Cd79b	ENSMUSG00000040592	11	106172655	106176076
Scn4a	ENSMUSG00000001027	11	106179906	106214602
2310007L24Rik	ENSMUSG00000009210	11	106226788	106238428
Icam2	ENSMUSG00000001029	11	106238970	106249389
Ern1	ENSMUSG00000020715	11	106255964	106349166
Tex2	ENSMUSG00000040548	11	106363461	106474737
Pecam1	ENSMUSG00000020717	11	106515531	106611942
Gm885	ENSMUSG00000040528	11	106612517	106630108
Polg2	ENSMUSG00000020718	11	106629567	106640851
Ddx5	ENSMUSG00000020719	11	106641669	106650499
Ccdc45	ENSMUSG00000018372	11	106650566	106681244
Smurf2	ENSMUSG00000018363	11	106681380	106782029
Kpna2	ENSMUSG00000018362	11	106849943	106860855
Bptf	ENSMUSG00000040481	11	106894395	106993441
Nol11	ENSMUSG00000018433	11	107027977	107050695
Pitpnc1	ENSMUSG00000040430	11	107069206	107332034
Psmd12	ENSMUSG00000020720	11	107340798	107365676
Helz	ENSMUSG00000020721	11	107409244	107555140
Cacng1	ENSMUSG00000020722	11	107564532	107577836
Cacng4	ENSMUSG00000020723	11	107593671	107655871
Gm11652	ENSMUSG00000083465	11	105634832	105636098
Gm11653	ENSMUSG00000081270	11	105737219	105738227
Gm11651	ENSMUSG00000085297	11	105826922	105847008
Ace3	ENSMUSG00000087418	11	105855989	105866757
Gm11646	ENSMUSG00000085033	11	105912465	105913166
5330430P22Rik	ENSMUSG00000085255	11	105926391	105927619
Gm11672	ENSMUSG00000085229	11	105987650	105988665
Gm11706	ENSMUSG00000084930	11	106675984	106677322
Gm11707	ENSMUSG00000086481	11	106833372	106834404
Gm11708	ENSMUSG00000083356	11	106865223	106866054
Gm11705	ENSMUSG00000086772	11	106886995	106887221
1810010H24Rik	ENSMUSG00000078607	11	106889432	106891757
Gm11715	ENSMUSG00000087596	11	107018722	107028464
Gm11717	ENSMUSG00000081103	11	107033214	107033546
Gm11718	ENSMUSG00000081360	11	107052408	107052944
Gm11719	ENSMUSG00000081995	11	107192022	107192372
Gm11716	ENSMUSG00000086298	11	107199364	107206118
Gm11712	ENSMUSG00000087683	11	107248297	107250285
Gm11713	ENSMUSG00000085245	11	107271704	107274863
Gm11714	ENSMUSG00000087113	11	107289590	107297000
Gm11722	ENSMUSG00000086442	11	107343230	107344421
C330019F10Rik	ENSMUSG00000085864	11	107372717	107388534
A830035A12Rik	ENSMUSG00000059706	11	107393071	107409687
Gm11649	ENSMUSG00000083996	11	107393245	107393619
U6	ENSMUSG00000088400	11	106625949	106626055
AL603664.1	ENSMUSG00000093133	11	106644485	106644585
U1	ENSMUSG00000088702	11	106047758	106047901
SNORA76	ENSMUSG00000080540	11	106362557	106362691
Snord104	ENSMUSG00000065126	11	106362307	106362376
AL596246.1	ENSMUSG00000093028	11	105819346	105819575
U3	ENSMUSG00000080664	11	106586572	106586764
Mir3064	ENSMUSG00000093273	11	106644007	106644073
U6	ENSMUSG00000065162	11	106121520	106121627
snosnR60_Z15	ENSMUSG00000089521	11	106413344	106413430
Gm11650	ENSMUSG00000087184	11	107655180	107657296
7SK	ENSMUSG00000088279	11	107688688	107688974
Cacng5	ENSMUSG00000040373	11	107735919	107776369
Gm5786	ENSMUSG00000066487	12	60182006	60182887
Fbxo33	ENSMUSG00000035329	12	60301642	60320712
Sec23a	ENSMUSG00000020986	12	60059370	60113004
Sip1	ENSMUSG00000060121	12	60114380	60129455
Trappc6b	ENSMUSG00000020993	12	60144080	60162448
Pnn	ENSMUSG00000020994	12	60167906	60175004
Rpl21-ps3	ENSMUSG00000060566	12	60195042	60195524
Mia2	ENSMUSG00000035349	12	60196786	60210117
Ctage5	ENSMUSG00000021000	12	60230707	60292570
U2	ENSMUSG00000065232	12	60141322	60141512
SNORA17	ENSMUSG00000077586	12	60766641	60766771
U6	ENSMUSG00000089603	12	61836485	61836591
AC147101.1	ENSMUSG00000092775	12	60328951	60329231
SNORA3	ENSMUSG00000077603	12	60773977	60774107
SNORA26	ENSMUSG00000077505	12	60235059	60235180
Lrfn5	ENSMUSG00000035653	12	62624137	62958915
Spanxn4	ENSMUSG00000091396	12	63788809	63789231
U6	ENSMUSG00000088468	12	63021561	63021664
AC159639.1	ENSMUSG00000080349	12	63699879	63699997
7SK	ENSMUSG00000084664	12	62968043	62968355
Gm10436	ENSMUSG00000072907	12	89414033	89420338
Gm5662	ENSMUSG00000072905	12	89509084	89562433
Gm6190	ENSMUSG00000091139	12	89591799	89592682
Adck1	ENSMUSG00000021044	12	89598998	89700163
Nrxn3	ENSMUSG00000066392	12	89961320	91573375
Gm8332	ENSMUSG00000072906	12	89488110	89488544
Gm10264	ENSMUSG00000069276	12	89567698	89568126
CT572991.1	ENSMUSG00000092733	12	89817159	89817266
AC154495.1	ENSMUSG00000077853	12	90086461	90086548
AC161049.1	ENSMUSG00000080680	12	90669780	90669845
Ppt2	ENSMUSG00000015474	17	34753607	34765455
Prrt1	ENSMUSG00000015476	17	34766478	34770071
Fkbpl	ENSMUSG00000033739	17	34781709	34783269
Atf6b	ENSMUSG00000015461	17	34784091	34792019
Tnxb	ENSMUSG00000033327	17	34807480	34856760
C4b	ENSMUSG00000073418	17	34865325	34880827
Cyp21a1	ENSMUSG00000024365	17	34938293	34941506
Stk19	ENSMUSG00000061207	17	34960938	34973890
Dom3z	ENSMUSG00000040482	17	34973964	34976178
Skiv2l	ENSMUSG00000040356	17	34976173	34987155
Rdbp	ENSMUSG00000024369	17	34987336	34993317
Cfb	ENSMUSG00000090231	17	34993319	34999463
C2	ENSMUSG00000024371	17	34993357	35035210
Gm20547	ENSMUSG00000092511	17	34993357	35018987
Zbtb12	ENSMUSG00000049823	17	35016428	35033787
Ehmt2	ENSMUSG00000013787	17	35035414	35050997
Slc44a4	ENSMUSG00000007034	17	35051411	35067381
Neu1	ENSMUSG00000007038	17	35068198	35072898
Hspa1b	ENSMUSG00000090877	17	35093381	35096183
Hspa1a	ENSMUSG00000091971	17	35106144	35109069
Gm20481	ENSMUSG00000092609	17	35106857	35109081
Hspa1l	ENSMUSG00000007033	17	35109648	35116229
Lsm2	ENSMUSG00000007050	17	35118807	35122836
D17H6S56E-5	ENSMUSG00000091747	17	35133681	35138609
Vars	ENSMUSG00000007029	17	35137932	35153267
D17H6S56E-3	ENSMUSG00000007030	17	35153524	35163686
Ng23	ENSMUSG00000036185	17	35162904	35164961
Msh5	ENSMUSG00000007035	17	35165550	35183690
Clic1	ENSMUSG00000007041	17	35186911	35195694
Ddah2	ENSMUSG00000007039	17	35195980	35199040
AU023871	ENSMUSG00000073414	17	35199638	35203129
Ly6g6c	ENSMUSG00000007044	17	35202333	35206570
Ly6g6c	ENSMUSG00000092586	17	35204270	35206995
Ly6g6d	ENSMUSG00000073413	17	35208388	35215010
Ly6g6e	ENSMUSG00000013766	17	35213847	35215749
Ly6g6f	ENSMUSG00000034923	17	35217425	35222555
Abhd16a	ENSMUSG00000007036	17	35226208	35239932
Ly6g5c	ENSMUSG00000034482	17	35245224	35248936
Ly6g5b	ENSMUSG00000043807	17	35250893	35252373
Csnk2b	ENSMUSG00000024387	17	35253141	35258998
Gpank1	ENSMUSG00000092417	17	35258400	35261759
D17H6S53E	ENSMUSG00000043311	17	35263318	35265800
Apom	ENSMUSG00000024391	17	35265942	35268995
Bag6	ENSMUSG00000024392	17	35272123	35284265
Prrc2a	ENSMUSG00000024393	17	35286021	35301842
Aif1	ENSMUSG00000024397	17	35307936	35313013
Lst1	ENSMUSG00000073412	17	35322040	35325384
Ltb	ENSMUSG00000024399	17	35331384	35333265
Tnf	ENSMUSG00000024401	17	35336326	35338952
Lta	ENSMUSG00000024402	17	35340110	35342296
Nfkbil1	ENSMUSG00000042419	17	35357120	35372737
Gm16181	ENSMUSG00000081650	17	35357779	35361079
Atp6v1g2	ENSMUSG00000024403	17	35370605	35375712
Ddx39b	ENSMUSG00000019432	17	35378691	35390652
H2-D1	ENSMUSG00000073411	17	35399675	35404444
H2-Q1	ENSMUSG00000079507	17	35457350	35462044
H2-Q2	ENSMUSG00000091705	17	35479187	35483707
H2-Q4	ENSMUSG00000035929	17	35516562	35522235
H2-Q6	ENSMUSG00000073409	17	35561795	35567000
H2-Q7	ENSMUSG00000060550	17	35576100	35580714
H2-Q10	ENSMUSG00000067235	17	35607034	35611508
Pou5f1	ENSMUSG00000024406	17	35642982	35647721
Tcf19	ENSMUSG00000050410	17	35649679	35653769
Cchcr1	ENSMUSG00000040312	17	35654045	35667960
Psors1c2	ENSMUSG00000024409	17	35670146	35671592
Cdsn	ENSMUSG00000039518	17	35689073	35694125
2300002M23Rik	ENSMUSG00000039269	17	35704395	35705897
Sfta2	ENSMUSG00000090509	17	35738494	35787516
Gm9573	ENSMUSG00000090588	17	35754868	35763582
Dpcr1	ENSMUSG00000073408	17	35772697	35780640
Vars2	ENSMUSG00000038838	17	35792579	35804537
Gtf2h4	ENSMUSG00000001524	17	35804675	35810684
Ddr1	ENSMUSG00000003534	17	35818512	35841566
Ier3	ENSMUSG00000003541	17	35958629	35959868
Flot1	ENSMUSG00000059714	17	35960175	35969736
Tubb5	ENSMUSG00000001525	17	35970871	35975251
Mdc1	ENSMUSG00000061607	17	35978460	35996615
Nrm	ENSMUSG00000059791	17	35998263	36002347
Ppp1r18	ENSMUSG00000034595	17	36002538	36012541
Dhx16	ENSMUSG00000024422	17	36016764	36029615
2310061I04Rik	ENSMUSG00000050705	17	36029622	36034376
Atat1	ENSMUSG00000024426	17	36034540	36047020
Mrps18b	ENSMUSG00000024436	17	36047324	36053334
Ppp1r10	ENSMUSG00000039220	17	36053379	36069226
Abcf1	ENSMUSG00000038762	17	36093764	36106706
Prr3	ENSMUSG00000038500	17	36109486	36117181
Gnl1	ENSMUSG00000024429	17	36116796	36126407
Gm20508	ENSMUSG00000092604	17	36128812	36130683
H2-T24	ENSMUSG00000053835	17	36142640	36157505
Gm17579	ENSMUSG00000092126	17	36150382	36156101
H2-T23	ENSMUSG00000067212	17	36166718	36169800
H2-T22	ENSMUSG00000056116	17	36174073	36179692
Gm6034	ENSMUSG00000073407	17	36179906	36195590
Gm11127	ENSMUSG00000079492	17	36192761	36195316
H2-Bl	ENSMUSG00000073406	17	36201920	36221168
H2-T10	ENSMUSG00000079491	17	36252821	36258410
Gm19684	ENSMUSG00000092277	17	36258623	36266637
Gm7030	ENSMUSG00000092243	17	36264424	36266370
2410017I17Rik	ENSMUSG00000038311	17	36281963	36299518
Gm8909	ENSMUSG00000073402	17	36301388	36305482
Gm8909	ENSMUSG00000092478	17	36301389	36305482
H2-T3	ENSMUSG00000054128	17	36322517	36327232
H2-Ob	ENSMUSG00000041538	17	34375848	34390850
H2-Ab1	ENSMUSG00000073421	17	34400154	34406363
H2-Aa	ENSMUSG00000036594	17	34406276	34424772
H2-Eb1	ENSMUSG00000060586	17	34442828	34453144
H2-Eb2	ENSMUSG00000067341	17	34462610	34477174
Gm11140	ENSMUSG00000079538	17	34477973	34478568
Btnl2	ENSMUSG00000024340	17	34491767	34506438
Btnl1	ENSMUSG00000062638	17	34514077	34522721
BC051142	ENSMUSG00000057246	17	34535765	34597679
Btnl4	ENSMUSG00000058435	17	34605987	34612882
Btnl6	ENSMUSG00000058762	17	34644880	34654297
Btnl7	ENSMUSG00000061728	17	34669822	34684596
Notch4	ENSMUSG00000015468	17	34701213	34725448
Gpsm3	ENSMUSG00000034786	17	34726751	34728699
Pbx2	ENSMUSG00000034673	17	34728211	34734345
Gm8752	ENSMUSG00000092278	17	35582801	35585871
Gm20461	ENSMUSG00000092525	17	34777791	34780922
Cyp21a2-ps	ENSMUSG00000092471	17	34856758	34859197
Gm20460	ENSMUSG00000092176	17	34751429	34764294
Gm15329	ENSMUSG00000083441	17	34658695	34658849
Gm20462	ENSMUSG00000092406	17	34704675	34705082
Btnl6	ENSMUSG00000092618	17	34644749	34654297
Gm15331	ENSMUSG00000083020	17	34638052	34638436
Agpat1	ENSMUSG00000034254	17	34741207	34750394
Egfl8	ENSMUSG00000015467	17	34750294	34752916
Gm20463	ENSMUSG00000092395	17	34738096	34738521
Gm18734	ENSMUSG00000092438	17	35441151	35443262
Gm8741	ENSMUSG00000091655	17	35472854	35473240
H2-Q3	ENSMUSG00000092253	17	35495934	35496917
Gm11131	ENSMUSG00000079505	17	35513966	35517237
H2-Q5	ENSMUSG00000055413	17	35531071	35534971
CT025759.1	ENSMUSG00000093620	17	34993518	34999057
1110038B12Rik	ENSMUSG00000092203	17	35087183	35089416
Rnf5	ENSMUSG00000015478	17	34738036	34740635
Gm8696	ENSMUSG00000092557	17	35091273	35091657
Gm10501	ENSMUSG00000073415	17	35113844	35118733
Gm20522	ENSMUSG00000092241	17	35259683	35263385
Gm17705	ENSMUSG00000090936	17	35302064	35304131
Ncr3-ps	ENSMUSG00000086076	17	35317480	35321607
Gm18733	ENSMUSG00000092444	17	35415121	35416359
Stk19-ps1	ENSMUSG00000092202	17	34881698	34884099
Skiv2l-ps1	ENSMUSG00000092543	17	34906778	34908173
Tnxa	ENSMUSG00000092200	17	34908340	34938568
C4a	ENSMUSG00000015451	17	34946037	34960409
Ager	ENSMUSG00000015452	17	34734807	34737879
Gm20506	ENSMUSG00000092222	17	34386002	34387209
Gm20513	ENSMUSG00000092415	17	34430018	34442665
H2-Ea-ps	ENSMUSG00000036322	17	34478897	34481589
Gm15320	ENSMUSG00000082103	17	34528306	34535107
Gm15321	ENSMUSG00000083522	17	34529348	34529635
Gm15332	ENSMUSG00000083369	17	34617708	34618064
Btnl5	ENSMUSG00000073420	17	34625015	34634374
Gm20527	ENSMUSG00000092198	17	35602400	35603427
Gm20419	ENSMUSG00000092215	17	35617084	35617673
Gm19553	ENSMUSG00000093516	17	35646022	35647496
Gm9613	ENSMUSG00000092409	17	35698868	35699063
Gm20483	ENSMUSG00000092389	17	35788773	35789256
Gm4577	ENSMUSG00000086867	17	35840841	35845189
Gm20443	ENSMUSG00000092219	17	35874679	35876751
Gm20442	ENSMUSG00000092600	17	35880268	35901136
4833427F10Rik	ENSMUSG00000092171	17	35909395	35917632
5530401N12Rik	ENSMUSG00000087443	17	35997863	36003831
Gm16279	ENSMUSG00000084998	17	36033891	36049160
Gm9840	ENSMUSG00000049832	17	36072526	36072895
Gm8801	ENSMUSG00000092284	17	36084191	36089242
A930015D03Rik	ENSMUSG00000092368	17	36131398	36175380
A930015D03Rik	ENSMUSG00000092254	17	36131449	36175386
Gm17414	ENSMUSG00000078821	17	36131461	36136694
BC023719	ENSMUSG00000092365	17	36169365	36254066
Gm8810	ENSMUSG00000091373	17	36203053	36204709
Gm20530	ENSMUSG00000092304	17	36231126	36231708
Gm8815	ENSMUSG00000092224	17	36231913	36233750
C920025E04Rik	ENSMUSG00000073405	17	36245531	36248633
Gm9574	ENSMUSG00000073980	17	36273812	36275385
Gm9574	ENSMUSG00000092630	17	36275542	36275788
Gm10499	ENSMUSG00000073403	17	36278703	36282868
Gm17782	ENSMUSG00000092366	17	36293478	36293754
Gm6659	ENSMUSG00000092289	17	36294933	36295479
Gm20478	ENSMUSG00000092474	17	36304927	36308750
Gm6623	ENSMUSG00000092374	17	36316059	36316602
Gm20495	ENSMUSG00000092480	17	36319141	36319375
Gm4246	ENSMUSG00000092240	17	36331541	36331756
Gm20447	ENSMUSG00000092306	17	36334597	36335449
Gm8835	ENSMUSG00000092457	17	36339294	36343268
Gm5682	ENSMUSG00000092265	17	36347640	36362177
Gm20392	ENSMUSG00000092362	17	36352500	36353001
Gm10074	ENSMUSG00000060087	17	36362945	36363219
Gm20545	ENSMUSG00000092428	17	36363760	36363969
Gm18604	ENSMUSG00000092612	17	36365871	36366703
Gm8750	ENSMUSG00000092560	17	35537744	35540672
SNORD83	ENSMUSG00000075770	17	35379623	35379699
Mir1894	ENSMUSG00000084751	17	36054834	36054914
U6	ENSMUSG00000065816	17	34824641	34824747
AC087117.2	ENSMUSG00000092687	17	35088958	35089020
SNORA38	ENSMUSG00000064853	17	35299508	35299641
SNORD83	ENSMUSG00000065273	17	35384120	35384195
AC087117.1	ENSMUSG00000092678	17	35089185	35089254
U6	ENSMUSG00000065774	17	35836148	35836254
Snord52	ENSMUSG00000093009	17	35087897	35087962
U6	ENSMUSG00000065139	17	35186163	35186266
CR974466.1	ENSMUSG00000077807	17	35390896	35390984
Mir877	ENSMUSG00000077931	17	36097675	36097759
Rftn1	ENSMUSG00000039316	17	50131582	50329999
AI314976	ENSMUSG00000040771	17	48549339	48556591
B430306N03Rik	ENSMUSG00000043740	17	48455466	48466349
Nfya	ENSMUSG00000023994	17	48526210	48549231
Daam2	ENSMUSG00000040260	17	49595347	49703662
Kif6	ENSMUSG00000023999	17	49754461	50049172
Trem2	ENSMUSG00000023992	17	48485726	48493472
Treml1	ENSMUSG00000023993	17	48499241	48506499
Lrfn2	ENSMUSG00000040490	17	49071704	49236913
Mocs1	ENSMUSG00000064120	17	49567687	49594760
Treml2	ENSMUSG00000071068	17	48438864	48451859
Trem3	ENSMUSG00000041754	17	48386944	48398207
Treml4	ENSMUSG00000051682	17	48403659	48414726
A530064D06Rik	ENSMUSG00000043939	17	48288846	48304220
1700067P10Rik	ENSMUSG00000021545	17	48226582	48227870
9830107B12Rik	ENSMUSG00000073386	17	48262555	48283228
Trem1	ENSMUSG00000042265	17	48371903	48386091
Gm20540	ENSMUSG00000092268	17	49567263	49568565
Gm16555	ENSMUSG00000090012	17	49956951	49961150
Gm16554	ENSMUSG00000090227	17	50034067	50035292
Apobec2	ENSMUSG00000040694	17	48558556	48572053
Tspo2	ENSMUSG00000023995	17	48587281	48590847
Unc5cl	ENSMUSG00000043592	17	48594226	48679039
AC154247.1	ENSMUSG00000077868	17	49325603	49325684
7SK	ENSMUSG00000088483	17	48831775	48832032
SNORA17	ENSMUSG00000077708	17	48757148	48757279
U1	ENSMUSG00000064541	17	49432067	49432226
Tbc1d5	ENSMUSG00000023923	17	50872452	51318674
Satb1	ENSMUSG00000023927	17	51875512	51972615
Kcnh8	ENSMUSG00000035580	17	52865084	53044561
AC121600.1	ENSMUSG00000078067	17	52544362	52544442
Kcnh8	ENSMUSG00000073383	17	53093281	53121602
Efhb	ENSMUSG00000023931	17	53538214	53602646
Rab5a	ENSMUSG00000017831	17	53618559	53646996
4921523A10Rik	ENSMUSG00000044957	17	53646785	53678776
Gm6941	ENSMUSG00000067093	17	53493835	53494149
1700011I03Rik	ENSMUSG00000058925	18	57693434	57890719
Slc12a2	ENSMUSG00000024597	18	58038332	58106475
Fbn2	ENSMUSG00000024598	18	58168277	58369580
Slc27a6	ENSMUSG00000024600	18	58715911	58772427
Isoc1	ENSMUSG00000024601	18	58819136	58839224
Adamts19	ENSMUSG00000053441	18	58996418	59213332
A730017C20Rik	ENSMUSG00000050875	18	59221902	59236616
Chsy3	ENSMUSG00000058152	18	59335055	59570100
Gm17593	ENSMUSG00000091641	18	58369906	58381539
SNORA17	ENSMUSG00000077243	18	58775013	58775143
U6	ENSMUSG00000088776	18	57829107	57829212
U7	ENSMUSG00000087941	18	59272541	59272600
5S_rRNA	ENSMUSG00000089095	18	58391126	58391229
7SK	ENSMUSG00000089285	18	59897718	59898011
Dcc	ENSMUSG00000060534	18	71418392	72510723
Mbd2	ENSMUSG00000024513	18	70727843	70785785
4930503L19Rik	ENSMUSG00000044906	18	70612794	70632134
Stard6	ENSMUSG00000079608	18	70632108	70660720
Poli	ENSMUSG00000038425	18	70668334	70690274
AC139348.1	ENSMUSG00000080635	18	73059536	73059641

## Sheet: longevityIgG1-Prn
Gene Name	Ensembl Gene ID	Chromosome	Start	End
Sulf1	ENSMUSG00000016918	1	12708626	12850452
Slco5a1	ENSMUSG00000025938	1	12856630	12981258
Prdm14	ENSMUSG00000042414	1	13103538	13117244
Ncoa2	ENSMUSG00000005886	1	13129186	13364164
Tram1	ENSMUSG00000025935	1	13554783	13579945
Lactb2	ENSMUSG00000025937	1	13614926	13650627
Xkr9	ENSMUSG00000067813	1	13658852	13691804
Eya1	ENSMUSG00000025932	1	14159035	14300281
Gm17644	ENSMUSG00000066918	1	12657644	12663171
7SK	ENSMUSG00000089358	1	13922459	13922766
U6	ENSMUSG00000087782	1	13324579	13324690
SNORA17	ENSMUSG00000077368	1	13764415	13764545
AC156988.1	ENSMUSG00000093057	1	14172659	14172758
C230034O21Rik	ENSMUSG00000086181	3	38773492	38787181
Gm9845	ENSMUSG00000050533	3	39257180	39257827
Rpl21-ps10	ENSMUSG00000064315	3	38006330	38006877
Ankrd50	ENSMUSG00000044864	3	38348183	38383766
Fat4	ENSMUSG00000046743	3	38785862	38910907
SNORA17	ENSMUSG00000089520	3	39698554	39698638
n-R5s195	ENSMUSG00000064825	3	39534886	39535004
AC162799.1	ENSMUSG00000092986	3	38166760	38167006
U1	ENSMUSG00000065945	3	39565210	39565369
AC114901.1	ENSMUSG00000076385	3	38457031	38457136
Pitpnb	ENSMUSG00000050017	5	111759783	111817379
Mn1	ENSMUSG00000070576	5	111846382	111886053
Crlf2	ENSMUSG00000033467	5	109983730	109988012
5430403G16Rik	ENSMUSG00000072763	5	110103564	110120060
4930522L14Rik	ENSMUSG00000072762	5	110165009	110180905
Gm15446	ENSMUSG00000090015	5	110352419	110372955
Zfp932	ENSMUSG00000066613	5	110425540	110439430
Gm17655	ENSMUSG00000090963	5	110475251	110475505
Plcxd1	ENSMUSG00000064247	5	110528988	110534972
Gtpbp6	ENSMUSG00000033434	5	110532994	110537216
Zfp605	ENSMUSG00000023284	5	110539111	110560756
Chfr	ENSMUSG00000014668	5	110564859	110600991
Golga3	ENSMUSG00000029502	5	110605720	110655489
Ankle2	ENSMUSG00000029501	5	110660060	110685666
Pgam5	ENSMUSG00000029500	5	110688149	110698932
Pxmp2	ENSMUSG00000029499	5	110703301	110715205
Pole	ENSMUSG00000007080	5	110715325	110766493
P2rx2	ENSMUSG00000029503	5	110768831	110772168
Gm1679	ENSMUSG00000072754	5	110783115	110785106
Fbrsl1	ENSMUSG00000043323	5	110790773	110877522
Galnt9	ENSMUSG00000033316	5	110973364	111050401
Noc4l	ENSMUSG00000033294	5	111077437	111082436
Ddx51	ENSMUSG00000029504	5	111082470	111089515
Ep400	ENSMUSG00000029505	5	111093392	111199736
Pus1	ENSMUSG00000029507	5	111202686	111209678
Ulk1	ENSMUSG00000029512	5	111213507	111239116
Hscb	ENSMUSG00000043510	5	111258089	111268796
Chek2	ENSMUSG00000029521	5	111269036	111303152
Gm17724	ENSMUSG00000090661	5	110814854	110817092
1010001B22Rik	ENSMUSG00000091434	5	110424530	110425417
Gm16739	ENSMUSG00000085131	5	110351668	110352500
Gm8488	ENSMUSG00000093688	5	109956479	109958489
Gm8508	ENSMUSG00000049477	5	110186541	110186950
Gm15484	ENSMUSG00000081865	5	110547041	110547868
Gm15787	ENSMUSG00000086247	5	110583419	110605523
Gm15788	ENSMUSG00000087439	5	110691180	110706286
Gm15791	ENSMUSG00000081256	5	110757223	110757541
Gm15792	ENSMUSG00000085606	5	110760225	110762222
A630023P12Rik	ENSMUSG00000048215	5	110943942	110954999
Gm15559	ENSMUSG00000086401	5	111199968	111208279
Ttc28	ENSMUSG00000033209	5	111308822	111718800
Gm15989	ENSMUSG00000081104	5	111334263	111334760
Gm15988	ENSMUSG00000083771	5	111437499	111437865
Gm16728	ENSMUSG00000087494	5	110688182	110698866
Gm17598	ENSMUSG00000091066	5	111208901	111210146
U6	ENSMUSG00000065775	5	111106143	111106249
SNORA49	ENSMUSG00000077254	5	111121068	111121200
U6	ENSMUSG00000065071	5	111186104	111186210
Mir701	ENSMUSG00000076163	5	111433163	111433271
SNORA70	ENSMUSG00000087722	5	110757051	110757202
C130026L21Rik	ENSMUSG00000052848	5	112010442	112016965
E130006D01Rik	ENSMUSG00000085271	5	112163304	112190745
Gm16019	ENSMUSG00000085919	5	112171869	112177196
Cryba4	ENSMUSG00000066975	5	112675513	112681538
Crybb1	ENSMUSG00000029343	5	112684835	112698605
Tpst2	ENSMUSG00000029344	5	112705711	112744381
Tfip11	ENSMUSG00000029345	5	112755378	112767093
Miat	ENSMUSG00000086878	5	112642248	112657968
Srrd	ENSMUSG00000029346	5	112766412	112772060
Hps4	ENSMUSG00000042328	5	112772103	112807434
Gm6583	ENSMUSG00000051503	5	112782821	112785053
Asphd2	ENSMUSG00000029348	5	112814468	112821233
RP23-459I1.1	ENSMUSG00000093637	5	112803389	112806659
2810417H13Rik	ENSMUSG00000040204	9	65738044	65751073
Csnk1g1	ENSMUSG00000032384	9	65756781	65892816
Ppib	ENSMUSG00000032383	9	65907976	65914436
Snx22	ENSMUSG00000039452	9	65912983	65917538
Snx1	ENSMUSG00000032382	9	65935940	65974394
Fam96a	ENSMUSG00000032381	9	65974418	65986762
Dapk2	ENSMUSG00000032380	9	66006030	66120049
Herc1	ENSMUSG00000038664	9	66198257	66356582
Fbxl22	ENSMUSG00000050503	9	66356266	66362400
Usp3	ENSMUSG00000032376	9	66362444	66440949
Gm16218	ENSMUSG00000059571	9	65145339	65145726
Kbtbd13	ENSMUSG00000054978	9	65237944	65239459
Oaz2	ENSMUSG00000040652	9	65515808	65538107
Gm16073	ENSMUSG00000079915	9	65685974	65686490
Gm15563	ENSMUSG00000086387	9	66419808	66429866
Plekho2	ENSMUSG00000050721	9	65402193	65427847
Ptplad1	ENSMUSG00000033629	9	64834792	64869524
Clpx	ENSMUSG00000015357	9	65142067	65178465
Pdcd7	ENSMUSG00000041837	9	65193875	65207450
Gm514	ENSMUSG00000086228	9	65208867	65228184
Rasl12	ENSMUSG00000041696	9	65246295	65262660
Ostb	ENSMUSG00000053862	9	65260560	65270580
Mtfmt	ENSMUSG00000059183	9	65283589	65300861
Spg21	ENSMUSG00000032388	9	65308744	65336277
Ankdd1a	ENSMUSG00000066510	9	65349260	65364806
Rab11a	ENSMUSG00000004771	9	64563106	64585565
2010321M09Rik	ENSMUSG00000034263	9	64808639	64834781
Parp16	ENSMUSG00000032392	9	65062497	65087026
Cilp	ENSMUSG00000042254	9	65112987	65128413
Rbpms2	ENSMUSG00000032387	9	65477455	65508335
Zfp609	ENSMUSG00000040524	9	65539391	65675371
Trip4	ENSMUSG00000032386	9	65678943	65756601
Igdcc3	ENSMUSG00000032394	9	64988961	65033664
Dennd4a	ENSMUSG00000053641	9	64659147	64767474
Dpp8	ENSMUSG00000032393	9	64880265	64930457
Igdcc4	ENSMUSG00000032816	9	64949293	64985747
Slc24a1	ENSMUSG00000034452	9	64770668	64799414
Pif1	ENSMUSG00000041064	9	65434967	65443774
Megf11	ENSMUSG00000036466	9	64233433	64557012
SNORA17	ENSMUSG00000077385	9	65800121	65800252
AC110235.1	ENSMUSG00000093316	9	65181085	65181318
U5	ENSMUSG00000075930	9	65049533	65049648
n-R5s85	ENSMUSG00000065387	9	65684160	65684272
U6	ENSMUSG00000065301	9	65748008	65748115
U5	ENSMUSG00000075763	9	65044379	65044494
AC122463.1	ENSMUSG00000093119	9	64819476	64819600
U6	ENSMUSG00000084437	9	66208448	66208549
AC161366.1	ENSMUSG00000089574	9	64989093	64989163
SNORA17	ENSMUSG00000089336	9	64729591	64729732
Car12	ENSMUSG00000032373	9	66561493	66614652
Aph1b	ENSMUSG00000032375	9	66623009	66643297
Gm10647	ENSMUSG00000074232	9	66644846	66646881
BC050972	ENSMUSG00000092131	9	66646485	66652166
Ppp1r2-ps4	ENSMUSG00000059237	9	66653113	66653745
Aph1c	ENSMUSG00000053040	9	66662801	66682533
Gm17098	ENSMUSG00000091745	9	66682506	66683341
Rab8b	ENSMUSG00000036943	9	66691479	66767512
Rps27l	ENSMUSG00000036781	9	66793893	66797323
Lactb	ENSMUSG00000032370	9	66803200	66823291
Tpm1	ENSMUSG00000032366	9	66870397	66897213
U6	ENSMUSG00000089450	9	66828895	66828992
U1	ENSMUSG00000088021	9	66952015	66952162
Tln2	ENSMUSG00000052698	9	67064894	67407510
Mir190	ENSMUSG00000076379	9	67084458	67084542
Atp2b1	ENSMUSG00000019943	10	98377786	98488777
Poc1b	ENSMUSG00000019952	10	98569670	98660708
Galnt4	ENSMUSG00000090035	10	98570793	98575881
Phxr2	ENSMUSG00000055108	10	98588151	98588955
Dusp6	ENSMUSG00000019960	10	98725865	98730122
B530045E10Rik	ENSMUSG00000044633	10	98883156	98885681
Gad1-ps	ENSMUSG00000090665	10	98906364	98909641
Csl	ENSMUSG00000046934	10	99220339	99222292
Kitl	ENSMUSG00000019966	10	99478264	99563047
Gm8701	ENSMUSG00000091739	10	99788062	99794069
Gm16239	ENSMUSG00000089994	10	98641818	98647244
AC167229.1	ENSMUSG00000077034	10	99606888	99606997
AC167229.2	ENSMUSG00000077043	10	99602135	99602244
Gm4301	ENSMUSG00000091918	10	99798310	99799225
Gm4302	ENSMUSG00000091101	10	99803490	99804374
Gm4303	ENSMUSG00000090421	10	99808624	99809493
Gm4305	ENSMUSG00000091715	10	99813745	99814614
Gm8711	ENSMUSG00000091552	10	99818871	99819750
Gm4307	ENSMUSG00000091170	10	99823990	99824859
Gm4308	ENSMUSG00000091145	10	99829133	99830048
Gm4312	ENSMUSG00000091915	10	99844279	99845194
Gm4781	ENSMUSG00000090987	10	99858921	99859706
Tmtc3	ENSMUSG00000036676	10	99906536	99949984
Cep290	ENSMUSG00000019971	10	99950923	100036289
Gm8723	ENSMUSG00000091738	10	99839096	99839969
Gm15910	ENSMUSG00000087480	10	120294685	120300382
Gm4473	ENSMUSG00000086522	10	120336213	120338944
Gm16166	ENSMUSG00000082936	10	120365242	120366028
Gm4478	ENSMUSG00000078107	10	120780328	120780714
Msrb3	ENSMUSG00000051236	10	120218152	120336157
Lemd3	ENSMUSG00000048661	10	120360469	120416388
Wif1	ENSMUSG00000020218	10	120471016	120537706
Tbc1d30	ENSMUSG00000052302	10	120700880	120748245
Gns	ENSMUSG00000034707	10	120802146	120834301
Rassf3	ENSMUSG00000025795	10	120847406	120913306
Tbk1	ENSMUSG00000020115	10	120983511	121023850
Xpot	ENSMUSG00000034667	10	121024436	121063372
D930020B18Rik	ENSMUSG00000047642	10	121078644	121130940
BC048403	ENSMUSG00000053684	10	121176993	121189934
Srgap1	ENSMUSG00000020121	10	121218047	121484371
Tmem5	ENSMUSG00000034620	10	121515170	121534427
Avpr1a	ENSMUSG00000020123	10	121885555	121890509
Ppm1h	ENSMUSG00000034613	10	122115818	122382851
AC124992.1	ENSMUSG00000092841	10	121055524	121055599
AC140381.1	ENSMUSG00000093030	10	120411357	120411481
3110053B16Rik	ENSMUSG00000085642	12	20879986	20927123
Gm10478	ENSMUSG00000073179	12	20902100	20902499
Gm20535	ENSMUSG00000092373	12	21257979	21261813
Gm5633	ENSMUSG00000091105	12	21832026	21832574
Gm4419	ENSMUSG00000090621	12	21423772	21425664
Gm10479	ENSMUSG00000073184	12	20421799	20439560
1700030C10Rik	ENSMUSG00000091071	12	20820118	20821588
Zfp125	ENSMUSG00000069755	12	20905683	20906728
Asap2	ENSMUSG00000052632	12	20996320	21276032
Itgb1bp1	ENSMUSG00000062352	12	21246686	21292098
Cpsf3	ENSMUSG00000054309	12	21292158	21320917
Iah1	ENSMUSG00000062054	12	21322253	21329466
Adam17	ENSMUSG00000052593	12	21329370	21379493
Ywhaq	ENSMUSG00000076432	12	21395932	21423498
Gm17680	ENSMUSG00000073183	12	21834340	21834747
AC140457.1	ENSMUSG00000093145	12	21373579	21373652
AC156032.1	ENSMUSG00000093197	12	21279165	21279393
SNORA21	ENSMUSG00000070166	12	21293788	21293920
U6	ENSMUSG00000088997	12	21360215	21360313
2610204G07Rik	ENSMUSG00000084860	13	105475011	105485074
Gm4938	ENSMUSG00000071193	13	105708859	105709266
Sgtb	ENSMUSG00000042743	13	104899821	104931815
Srek1	ENSMUSG00000032621	13	104531695	104564539
Erbb2ip	ENSMUSG00000021709	13	104608867	104710594
Nln	ENSMUSG00000021710	13	104813488	104899694
Ppwd1	ENSMUSG00000021713	13	104995201	105018924
Cenpk	ENSMUSG00000021714	13	105019035	105041728
2410002O22Rik	ENSMUSG00000021711	13	104932229	104968549
2410002O22Rik	ENSMUSG00000078936	13	104963802	104968519
Trim23	ENSMUSG00000021712	13	104968877	104993452
Adamts6	ENSMUSG00000046169	13	105077953	105284843
Cwc27	ENSMUSG00000021715	13	105421220	105607222
Srek1ip1	ENSMUSG00000021716	13	105582564	105629354
Fam159b	ENSMUSG00000042655	13	105635363	105653973
Rgs7bp	ENSMUSG00000021719	13	105737233	105845010
4933425L06Rik	ENSMUSG00000021718	13	105872202	105911862
Rnf180	ENSMUSG00000021720	13	105921444	106061119
Htr1a	ENSMUSG00000021721	13	106233773	106238213
SNORA17	ENSMUSG00000077578	13	106013349	106013478
U6	ENSMUSG00000064922	13	104432006	104432112
Gpr111	ENSMUSG00000057899	17	42845885	42879128
Cd2ap	ENSMUSG00000061665	17	42929900	43013373
Tnfrsf21	ENSMUSG00000023915	17	43153504	43226137
Gpr110	ENSMUSG00000041293	17	43407278	43461686
Gpr116	ENSMUSG00000056492	17	43526415	43596506
Mep1a	ENSMUSG00000023914	17	43611273	43639761
Pla2g7	ENSMUSG00000023913	17	43705047	43749150
Tdrd6	ENSMUSG00000040140	17	43752284	43767248
Slc25a27	ENSMUSG00000023912	17	43778849	43804125
Cyp39a1	ENSMUSG00000023963	17	43804374	43888380
Rcan2	ENSMUSG00000039601	17	43938800	44176465
Enpp5	ENSMUSG00000023960	17	44215762	44223516
Enpp4	ENSMUSG00000023961	17	44233257	44242758
Clic5	ENSMUSG00000023959	17	44325521	44417117
Runx2	ENSMUSG00000039153	17	44632936	44951746
Runx2	ENSMUSG00000092206	17	44744480	44951746
1700071M16Rik	ENSMUSG00000090307	17	43725289	43729391
Gm16317	ENSMUSG00000090048	17	44698939	44700121
U4	ENSMUSG00000064582	17	43591204	43591346
n-R5s27	ENSMUSG00000070209	17	44777974	44778092
U2	ENSMUSG00000084474	17	43835312	43835501
7SK	ENSMUSG00000088576	17	44098505	44098790
Supt3h	ENSMUSG00000038954	17	44914101	45256239
9530072K05Rik	ENSMUSG00000089849	17	44847171	44850874
Gm10497	ENSMUSG00000073394	17	44872794	44874561
Rftn1	ENSMUSG00000039316	17	50131582	50329999
AI314976	ENSMUSG00000040771	17	48549339	48556591
B430306N03Rik	ENSMUSG00000043740	17	48455466	48466349
Nfya	ENSMUSG00000023994	17	48526210	48549231
Daam2	ENSMUSG00000040260	17	49595347	49703662
Kif6	ENSMUSG00000023999	17	49754461	50049172
Trem2	ENSMUSG00000023992	17	48485726	48493472
Treml1	ENSMUSG00000023993	17	48499241	48506499
Lrfn2	ENSMUSG00000040490	17	49071704	49236913
Mocs1	ENSMUSG00000064120	17	49567687	49594760
Treml2	ENSMUSG00000071068	17	48438864	48451859
Trem3	ENSMUSG00000041754	17	48386944	48398207
Treml4	ENSMUSG00000051682	17	48403659	48414726
A530064D06Rik	ENSMUSG00000043939	17	48288846	48304220
9830107B12Rik	ENSMUSG00000073386	17	48262555	48283228
Trem1	ENSMUSG00000042265	17	48371903	48386091
Gm20540	ENSMUSG00000092268	17	49567263	49568565
Gm16555	ENSMUSG00000090012	17	49956951	49961150
Gm16554	ENSMUSG00000090227	17	50034067	50035292
Apobec2	ENSMUSG00000040694	17	48558556	48572053
Tspo2	ENSMUSG00000023995	17	48587281	48590847
Unc5cl	ENSMUSG00000043592	17	48594226	48679039
AC154247.1	ENSMUSG00000077868	17	49325603	49325684
7SK	ENSMUSG00000088483	17	48831775	48832032
SNORA17	ENSMUSG00000077708	17	48757148	48757279
U1	ENSMUSG00000064541	17	49432067	49432226

## Sheet: Venn
									74 common elements in "DT", "PT", "FHA" and "Prn":
									ENSMUSG00000086181	C230034O21Rik
									ENSMUSG00000050533	Gm9845
									ENSMUSG00000064315	Rpl21-ps10
									ENSMUSG00000044864	Ankrd50
									ENSMUSG00000046743	Fat4
									ENSMUSG00000089520	SNORA17
									ENSMUSG00000064825	n-R5s195
									ENSMUSG00000092986	AC162799.1
									ENSMUSG00000065945	U1
									ENSMUSG00000076385	AC114901.1
									ENSMUSG00000040204	2810417H13Rik
									ENSMUSG00000032384	Csnk1g1
									ENSMUSG00000032383	Ppib
									ENSMUSG00000039452	Snx22
									ENSMUSG00000032382	Snx1
									ENSMUSG00000032381	Fam96a
									ENSMUSG00000032380	Dapk2
									ENSMUSG00000038664	Herc1
									ENSMUSG00000050503	Fbxl22
									ENSMUSG00000032376	Usp3
									ENSMUSG00000059571	Gm16218
									ENSMUSG00000054978	Kbtbd13
									ENSMUSG00000040652	Oaz2
									ENSMUSG00000079915	Gm16073
									ENSMUSG00000086387	Gm15563
									ENSMUSG00000050721	Plekho2
									ENSMUSG00000033629	Ptplad1
									ENSMUSG00000015357	Clpx
									ENSMUSG00000041837	Pdcd7
									ENSMUSG00000086228	Gm514
									ENSMUSG00000041696	Rasl12
									ENSMUSG00000053862	Ostb
									ENSMUSG00000059183	Mtfmt
									ENSMUSG00000032388	Spg21
									ENSMUSG00000066510	Ankdd1a
									ENSMUSG00000004771	Rab11a
									ENSMUSG00000034263	2010321M09Rik
									ENSMUSG00000032392	Parp16
									ENSMUSG00000042254	Cilp
									ENSMUSG00000032387	Rbpms2
									ENSMUSG00000040524	Zfp609
									ENSMUSG00000032386	Trip4
									ENSMUSG00000032394	Igdcc3
									ENSMUSG00000053641	Dennd4a
									ENSMUSG00000032393	Dpp8
									ENSMUSG00000032816	Igdcc4
									ENSMUSG00000034452	Slc24a1
									ENSMUSG00000041064	Pif1
									ENSMUSG00000036466	Megf11
									ENSMUSG00000077385	SNORA17
									ENSMUSG00000093316	AC110235.1
									ENSMUSG00000075930	U5
									ENSMUSG00000065387	n-R5s85
									ENSMUSG00000065301	U6
									ENSMUSG00000075763	U5
									ENSMUSG00000093119	AC122463.1
									ENSMUSG00000084437	U6
									ENSMUSG00000089574	AC161366.1
									ENSMUSG00000089336	SNORA17
									ENSMUSG00000032373	Car12
									ENSMUSG00000032375	Aph1b
									ENSMUSG00000074232	Gm10647
									ENSMUSG00000092131	BC050972
									ENSMUSG00000059237	Ppp1r2-ps4
									ENSMUSG00000053040	Aph1c
									ENSMUSG00000091745	Gm17098
									ENSMUSG00000036943	Rab8b
									ENSMUSG00000036781	Rps27l
									ENSMUSG00000032370	Lactb
									ENSMUSG00000032366	Tpm1
									ENSMUSG00000089450	U6
									ENSMUSG00000088021	U1
									ENSMUSG00000052698	Tln2
									ENSMUSG00000076379	Mir190
