# Supplementary material for: Genetic Variation in the Magnitude and Longevity of the IgG Subclass Response to a Diphtheria-Tetanus-Acellular Pertussis (DTaP) Vaccine in Mice
Source: Vaccines (Basel). 2019 Sep 20;7(4):124. doi: 10.3390/vaccines7040124 (PMC6963843; doi:10.3390/vaccines7040124)
Supplement: Supplementary file 1 [file vaccines-07-00124-s001.zip › Supplemental Data/longevityIgG2b_genelist.xlsx]

## Sheet: longevityIgG2bDT_genelist
Gene Name	Ensembl Gene ID	Chromosome	Start	End
Xkr4	ENSMUSG00000051951	1	3195982	3661579
Gm16088	ENSMUSG00000090025	1	3044314	3044814
Gm1992	ENSMUSG00000089699	1	3456668	3503634
U7	ENSMUSG00000089420	1	3773818	3773879
U6	ENSMUSG00000064842	1	3092097	3092206
U7	ENSMUSG00000088390	1	3668961	3669024
Rp1	ENSMUSG00000025900	1	4334224	4350473
Sox17	ENSMUSG00000025902	1	4481009	4486494
U6	ENSMUSG00000064376	1	4519098	4519204
U6	ENSMUSG00000088000	1	4713358	4713460
Mrpl15	ENSMUSG00000033845	1	4763287	4775820
Lypla1	ENSMUSG00000025903	1	4797869	4876851
Tcea1	ENSMUSG00000033813	1	4847775	4887987
Gm6104	ENSMUSG00000062588	1	4869283	4870750
Rgs20	ENSMUSG00000002459	1	4899657	5060366
Gm17100	ENSMUSG00000091305	1	4917109	4917380
Gm16041	ENSMUSG00000085623	1	4960938	4966901
Gm17101	ENSMUSG00000091665	1	5053141	5054728
Atp6v1h	ENSMUSG00000033793	1	5073254	5152630
Oprk1	ENSMUSG00000025905	1	5578574	5596212
AC103663.1	ENSMUSG00000093015	1	5634726	5634826
Npbwr1	ENSMUSG00000033774	1	5903788	5907479
Rb1cc1	ENSMUSG00000025907	1	6196278	6266729
4732440D04Rik	ENSMUSG00000073741	1	6204693	6205373
4732440D04Rik	ENSMUSG00000090031	1	6203374	6204671
St18	ENSMUSG00000033740	1	6477312	6851021
Fam150a	ENSMUSG00000087247	1	6349537	6384812
Pcmtd1	ENSMUSG00000051285	1	7079001	7163707
Gm9826	ENSMUSG00000048538	1	7167820	7169118
Gm16899	ENSMUSG00000086461	1	7339487	7387882
SNORA17	ENSMUSG00000077244	1	7255884	7256013
Sntg1	ENSMUSG00000025909	1	8351556	9289959
Gm16284	ENSMUSG00000086235	1	8458507	8458906
AC102703.1	ENSMUSG00000076169	1	8578696	8578805
Gm15452	ENSMUSG00000084353	1	8782004	8782243
AC163389.1	ENSMUSG00000076135	1	8806219	8806328
Gm6152	ENSMUSG00000086195	1	8846009	8846348
Gm7493	ENSMUSG00000066693	1	8953077	8953702
U6	ENSMUSG00000065625	1	9448751	9448853
Rrs1	ENSMUSG00000061024	1	9535489	9537535
Adhfe1	ENSMUSG00000025911	1	9538029	9568051
2610203C22Rik	ENSMUSG00000079671	1	9550913	9621256
3110035E14Rik	ENSMUSG00000067879	1	9591280	9617224
Mybl1	ENSMUSG00000025912	1	9657496	9690290
Vcpip1	ENSMUSG00000045210	1	9708703	9738463
Gm6161	ENSMUSG00000081441	1	9564629	9565730
1700034P13Rik	ENSMUSG00000085661	1	9737729	9782003
Sgk3	ENSMUSG00000025915	1	9788211	9892637
Gm6195	ENSMUSG00000046334	1	9792275	9792634
6030422M02Rik	ENSMUSG00000046101	1	9898719	9932166
Snord87	ENSMUSG00000093178	1	9932544	9932630
U6	ENSMUSG00000088916	1	9824579	9824683
Gm10567	ENSMUSG00000073738	1	9950252	9952890
Ppp1r42	ENSMUSG00000025916	1	9958705	9999217
Cops5	ENSMUSG00000025917	1	10014683	10028208
Gm15818	ENSMUSG00000087199	1	9972468	9982447
U6	ENSMUSG00000065085	1	9999895	9999998
Cspp1	ENSMUSG00000056763	1	10028299	10126849
Arfgef1	ENSMUSG00000067851	1	10127652	10222751
7SK	ENSMUSG00000088153	1	10156620	10156859
Cpa6	ENSMUSG00000042501	1	10314801	10710026
Gm15604	ENSMUSG00000083422	1	10544179	10545634
U6	ENSMUSG00000065035	1	10545635	10545741
Gm15603	ENSMUSG00000081417	1	10685204	10685695
SNORA66	ENSMUSG00000088585	1	10911751	10911841
Prex2	ENSMUSG00000048960	1	10983546	11293763
SNORA40	ENSMUSG00000077318	1	11124192	11124319
A830018L16Rik	ENSMUSG00000057715	1	11404186	11965982
U6	ENSMUSG00000064969	1	12365017	12365123
Sulf1	ENSMUSG00000016918	1	12708626	12850452
Slco5a1	ENSMUSG00000025938	1	12856630	12981258
Prdm14	ENSMUSG00000042414	1	13103538	13117244
Ncoa2	ENSMUSG00000005886	1	13129186	13364164
Gm17644	ENSMUSG00000066918	1	12657644	12663171
U6	ENSMUSG00000087782	1	13324579	13324690
Tram1	ENSMUSG00000025935	1	13554783	13579945
Lactb2	ENSMUSG00000025937	1	13614926	13650627
Xkr9	ENSMUSG00000067813	1	13658852	13691804
7SK	ENSMUSG00000089358	1	13922459	13922766
SNORA17	ENSMUSG00000077368	1	13764415	13764545
Eya1	ENSMUSG00000025932	1	14159035	14300281
AC156988.1	ENSMUSG00000093057	1	14172659	14172758
Msc	ENSMUSG00000025930	1	14743427	14746047
Gm9947	ENSMUSG00000054493	1	14745535	14748454
Trpa1	ENSMUSG00000032769	1	14862729	14908943
Smt3h2-ps4	ENSMUSG00000081201	1	14829950	14830237
Rpl5-ps1	ENSMUSG00000082193	1	14855153	14856046
Gm10566	ENSMUSG00000073737	1	15258880	15259878
Kcnb2	ENSMUSG00000092083	1	15277340	15704376
SNORA17	ENSMUSG00000088159	1	15009121	15009240
Kcnb2	ENSMUSG00000090498	1	15702384	15706448
SNORA17	ENSMUSG00000088829	1	15676016	15676127
Terf1	ENSMUSG00000025925	1	15795739	15833551
Gm106	ENSMUSG00000032719	1	15843943	15882803
4930444P10Rik	ENSMUSG00000067795	1	16056060	16083406
Rpl7	ENSMUSG00000043716	1	16091376	16094743
Rdh10	ENSMUSG00000025921	1	16095855	16123815
SNORA17	ENSMUSG00000077377	1	15747913	15748044
7SK	ENSMUSG00000088943	1	15869611	15869913
Stau2	ENSMUSG00000025920	1	16218755	16510193
Gm7568	ENSMUSG00000089982	1	16243673	16258002
Ube2w	ENSMUSG00000025939	1	16559863	16609570
Tceb1	ENSMUSG00000079658	1	16632847	16646946
Tmem70	ENSMUSG00000025940	1	16655288	16668356
Ly96	ENSMUSG00000025779	1	16678537	16699686
Gm5828	ENSMUSG00000091020	1	16757095	16760241
Gm16720	ENSMUSG00000087414	1	16647633	16652359
Jph1	ENSMUSG00000042686	1	16987545	17087879
Gdap1	ENSMUSG00000025777	1	17135443	17154352
SNORA17	ENSMUSG00000089534	1	17510082	17510192
Pi15	ENSMUSG00000067780	1	17591982	17621019
Crispld1	ENSMUSG00000025776	1	17717126	17756425
Gm16070	ENSMUSG00000085125	1	17666108	17717727
Crisp4	ENSMUSG00000025774	1	18105272	18135983
Defb18	ENSMUSG00000073735	1	18226554	18227524
Defb41	ENSMUSG00000067773	1	18241061	18255219
Gm15386	ENSMUSG00000089923	1	18250605	18255161
Defb44-ps	ENSMUSG00000070977	1	18200134	18213645
Tfap2d	ENSMUSG00000042596	1	19093103	19156427
Gm15825	ENSMUSG00000089787	1	19053380	19094921
SNORA17	ENSMUSG00000088800	1	18959843	18959914
Gm10075	ENSMUSG00000060128	1	19143391	19144047
Tfap2b	ENSMUSG00000025927	1	19198995	19228815
SNORD29	ENSMUSG00000084668	1	19503936	19504000
AC163028.1	ENSMUSG00000080585	1	19911391	19911480
Pkhd1	ENSMUSG00000043760	1	20047860	20608145
4930486I03Rik	ENSMUSG00000089914	1	20371174	20382381
Gm15795	ENSMUSG00000090142	1	20434339	20434641
U6	ENSMUSG00000070175	1	20434892	20434993
Gm9898	ENSMUSG00000053185	1	30775399	30776806
Phf3	ENSMUSG00000048874	1	30859187	30930539
Ptp4a1	ENSMUSG00000026064	1	30997148	31006615
Gm5698	ENSMUSG00000086151	1	31033795	31035810
Gm5699	ENSMUSG00000087346	1	31054712	31056750
4931428L18Rik	ENSMUSG00000086727	1	31197923	31279506
Lgsn	ENSMUSG00000050217	1	31233251	31261501
4930521A18Rik	ENSMUSG00000026063	1	31279684	31281132
Gm9458	ENSMUSG00000086726	1	31043070	31043798
Gm10307	ENSMUSG00000070960	1	31672836	31673507
Gm7910	ENSMUSG00000082159	1	31792901	31793737
SNORA17	ENSMUSG00000077664	1	31316438	31316564
U6	ENSMUSG00000088620	1	31713477	31713583
Khdrbs2	ENSMUSG00000026058	1	32229651	32714583
U6	ENSMUSG00000064688	1	32269978	32270084
Gm9839	ENSMUSG00000049830	1	32576408	32577844
Gm5415	ENSMUSG00000091318	1	32600391	32604138
U7	ENSMUSG00000089489	1	32625204	32625266
7SK	ENSMUSG00000089395	1	32783484	32783775
Ndufs1	ENSMUSG00000025968	1	63190170	63223396
Nrp2	ENSMUSG00000025969	1	62749859	62865269
Pard3b	ENSMUSG00000052062	1	61685398	62688858
Gm11588	ENSMUSG00000086408	1	61496945	61526319
4930587A21Rik	ENSMUSG00000086009	1	61663517	61667723
4930448K12Rik	ENSMUSG00000085842	1	61813989	61898114
Gm12747	ENSMUSG00000085019	1	62177769	62182683
Gm11610	ENSMUSG00000085400	1	62503299	62545835
Pard3b	ENSMUSG00000046526	1	62685290	62686957
Gm11600	ENSMUSG00000081950	1	62703269	62704362
Gm11599	ENSMUSG00000084333	1	62707413	62708290
Gm11601	ENSMUSG00000081617	1	63084788	63085155
Gm11603	ENSMUSG00000081429	1	63120348	63120593
Gm11602	ENSMUSG00000084799	1	63161045	63204864
Gm11607	ENSMUSG00000086730	1	63246887	63254188
Gm11608	ENSMUSG00000087561	1	63313422	63319694
Gm11606	ENSMUSG00000083039	1	63404008	63404624
Gm11605	ENSMUSG00000081643	1	63411294	63411939
Ino80d	ENSMUSG00000040865	1	63004992	63161241
Eef1b2	ENSMUSG00000025967	1	63223399	63227060
Gpr1	ENSMUSG00000046856	1	63229265	63261117
Zdbf2	ENSMUSG00000027520	1	63319839	63361150
Adam23	ENSMUSG00000025964	1	63492465	63643089
SNORA17	ENSMUSG00000088953	1	63079280	63079393
U6	ENSMUSG00000065946	1	63346854	63346957
U6	ENSMUSG00000089546	1	61527285	61527387
SNORD51	ENSMUSG00000064612	1	63225254	63225326
AL669947.1	ENSMUSG00000092705	1	63319800	63319937
Snora41	ENSMUSG00000064602	1	63225578	63225709
AL645950.1	ENSMUSG00000092874	1	63244605	63244730
Tnp1	ENSMUSG00000026182	1	73061657	73062473
Tns1	ENSMUSG00000055322	1	73956805	74171021
Rufy4	ENSMUSG00000061815	1	74172115	74194797
Cxcr2	ENSMUSG00000026180	1	74200563	74207812
Cxcr1	ENSMUSG00000048480	1	74238359	74241205
Arpc2	ENSMUSG00000006304	1	74283071	74314783
Gpbar1	ENSMUSG00000064272	1	74325124	74326198
Aamp	ENSMUSG00000006299	1	74326421	74331254
Pnkd	ENSMUSG00000026179	1	74331504	74400268
Tmbim1	ENSMUSG00000006301	1	74334821	74352196
Gm216	ENSMUSG00000073650	1	74408682	74415895
Slc11a1	ENSMUSG00000026177	1	74421777	74432636
Ctdsp1	ENSMUSG00000026176	1	74438083	74443859
Vil1	ENSMUSG00000026175	1	74455950	74482133
Usp37	ENSMUSG00000033364	1	74482084	74590860
Rqcd1	ENSMUSG00000026174	1	74552632	74577418
Plcd4	ENSMUSG00000026173	1	74589462	74614368
Zfp142	ENSMUSG00000026135	1	74611701	74634820
Bcs1l	ENSMUSG00000026172	1	74634863	74639017
Rnf25	ENSMUSG00000026171	1	74640322	74647971
Stk36	ENSMUSG00000033276	1	74648019	74683468
Ttll4	ENSMUSG00000033257	1	74708319	74748406
Cyp27a1	ENSMUSG00000026170	1	74760148	74784464
Prkag3	ENSMUSG00000006542	1	74786073	74795795
Wnt6	ENSMUSG00000033227	1	74818466	74831893
Wnt10a	ENSMUSG00000026167	1	74838090	74850753
Cdk5r2	ENSMUSG00000090071	1	74901508	74904005
Fev	ENSMUSG00000055197	1	74928083	74931993
Cryba2	ENSMUSG00000006546	1	74936508	74939717
Ccdc108	ENSMUSG00000047021	1	74948645	74982173
Gm16582	ENSMUSG00000089964	1	74897469	74926527
Gm15841	ENSMUSG00000089653	1	74948945	74954227
Mir26b	ENSMUSG00000065468	1	74440884	74440968
AC117610.1	ENSMUSG00000093155	1	74633470	74633546
Mir1928	ENSMUSG00000087820	1	74253128	74253194
U6	ENSMUSG00000075767	1	74259387	74259493
Mir375	ENSMUSG00000065616	1	74947226	74947300
5S_rRNA	ENSMUSG00000088666	1	73810284	73810409
Ihh	ENSMUSG00000006538	1	74991891	74998246
Nhej1	ENSMUSG00000026162	1	75013713	75093213
Slc23a3	ENSMUSG00000026205	1	75122117	75130464
1810031K17Rik	ENSMUSG00000033159	1	75131128	75139271
Fam134a	ENSMUSG00000049339	1	75139360	75144483
Zfand2b	ENSMUSG00000026197	1	75165220	75168203
Abcb6	ENSMUSG00000026198	1	75168291	75176966
Atg9a	ENSMUSG00000033124	1	75177440	75188497
Glb1l	ENSMUSG00000026200	1	75194818	75207353
Stk16	ENSMUSG00000026201	1	75207413	75212181
Tuba4a	ENSMUSG00000026202	1	75211549	75215828
Dnajb2	ENSMUSG00000026203	1	75233040	75241379
Ptprn	ENSMUSG00000026204	1	75243616	75260783
Ankzf1	ENSMUSG00000026199	1	75188709	75195962
Resp18	ENSMUSG00000033061	1	75268774	75274990
Dnpep	ENSMUSG00000026209	1	75304471	75314212
Des	ENSMUSG00000026208	1	75356904	75365154
Speg	ENSMUSG00000026207	1	75371872	75428895
Gmppa	ENSMUSG00000033021	1	75432505	75439754
Accn4	ENSMUSG00000033007	1	75447011	75470918
Chpf	ENSMUSG00000032997	1	75471144	75476046
Obsl1	ENSMUSG00000026211	1	75475885	75503027
Tmem198	ENSMUSG00000051703	1	75476107	75482280
Inha	ENSMUSG00000032968	1	75503652	75506941
Stk11ip	ENSMUSG00000026213	1	75518104	75533910
Slc4a3	ENSMUSG00000006576	1	75542841	75558747
Gm15179	ENSMUSG00000085653	1	75364787	75371587
Gm15178	ENSMUSG00000086053	1	75388706	75392938
Gm15181	ENSMUSG00000082745	1	75510682	75510858
Gm15183	ENSMUSG00000082059	1	75538786	75539133
Gm15180	ENSMUSG00000083244	1	75564658	75565149
Gm15182	ENSMUSG00000082528	1	75621229	75622904
Gm5257	ENSMUSG00000082012	1	75632965	75633754
Slc19a3	ENSMUSG00000038496	1	83009098	83035023
Ccl20	ENSMUSG00000026166	1	83113341	83115742
Wdr69	ENSMUSG00000053161	1	83156327	83207149
Sphkap	ENSMUSG00000026163	1	83250714	83404775
Pid1	ENSMUSG00000045658	1	84032868	84360755
Dner	ENSMUSG00000036766	1	84366416	84692796
Trip12	ENSMUSG00000026219	1	84717764	84835879
Fbxo36	ENSMUSG00000073633	1	84836416	84897062
Slc16a14	ENSMUSG00000026220	1	84902473	84931700
Gm6374	ENSMUSG00000079140	1	83311088	83311875
n-R5s214	ENSMUSG00000084443	1	83213246	83213366
Mir5126	ENSMUSG00000093254	1	84692414	84692490
SNORA17	ENSMUSG00000077736	1	83918493	83918616
AC158909.1	ENSMUSG00000080572	1	83792487	83792607
Glrp1	ENSMUSG00000062310	1	90397698	90406461
Arl4c	ENSMUSG00000049866	1	90569700	90598796
Sh3bp4	ENSMUSG00000036206	1	90966990	91051643
Agap1	ENSMUSG00000055013	1	91351381	91791857
Gbx2	ENSMUSG00000034486	1	91824537	91829865
D130058E05Rik	ENSMUSG00000092627	1	91826809	91828437
Asb18	ENSMUSG00000067081	1	91849166	91911241
Iqca	ENSMUSG00000026301	1	91938707	92049976
Cxcr7	ENSMUSG00000044337	1	92100555	92113326
7SK	ENSMUSG00000088775	1	91581377	91581687
5S_rRNA	ENSMUSG00000088371	1	91459935	91460049
Cops8	ENSMUSG00000034432	1	92500000	92509916
Gm9991	ENSMUSG00000056128	1	92571736	92576368
Col6a3	ENSMUSG00000048126	1	92663435	92740529
Mlph	ENSMUSG00000026303	1	92811662	92847719
Prlh	ENSMUSG00000090550	1	92849685	92850589
Rab17	ENSMUSG00000026304	1	92854710	92866238
Lrrfip1	ENSMUSG00000026305	1	92895304	93025521
Rbm44	ENSMUSG00000070732	1	93041680	93067372
Ramp1	ENSMUSG00000034353	1	93076399	93121773
Ube2f	ENSMUSG00000034343	1	93146888	93185454
Scly	ENSMUSG00000026307	1	93194915	93217652
Espnl	ENSMUSG00000049515	1	93218652	93244883
Klhl30	ENSMUSG00000026308	1	93247593	93258993
Fam132b	ENSMUSG00000047443	1	93263007	93270793
Ilkap	ENSMUSG00000026309	1	93271984	93295360
Gm7785	ENSMUSG00000083064	1	93192622	93193513
Gm17090	ENSMUSG00000090322	1	93201669	93217678
Gm17560	ENSMUSG00000091871	1	93193780	93200982
Hes6	ENSMUSG00000067071	1	93308060	93310615
Per2	ENSMUSG00000055866	1	93312561	93355907
Traf3ip1	ENSMUSG00000034292	1	93391245	93425880
Asb1	ENSMUSG00000026311	1	93437142	93456167
Twist2	ENSMUSG00000007805	1	93698038	93744605
Hdac4	ENSMUSG00000073617	1	93825362	93827753
Hdac4	ENSMUSG00000026313	1	93829334	94044970
Ndufa10	ENSMUSG00000026260	1	94335587	94370437
Olfr1416	ENSMUSG00000067064	1	94376258	94377196
Olfr1415	ENSMUSG00000057464	1	94387395	94388330
Olfr1414	ENSMUSG00000042849	1	94407625	94415092
Olfr1413	ENSMUSG00000058904	1	94469702	94470783
Gm17418	ENSMUSG00000079420	1	93885628	93889205
Olfr1412	ENSMUSG00000046300	1	94484909	94485874
Olfr1411	ENSMUSG00000062497	1	94493098	94494069
Olfr1410	ENSMUSG00000063583	1	94504416	94505424
Olfr12	ENSMUSG00000061616	1	94516458	94517578
Myeov2	ENSMUSG00000073616	1	94533722	94538562
Otos	ENSMUSG00000044055	1	94540795	94545418
Gpc1	ENSMUSG00000034220	1	94728222	94756775
Ankmy1	ENSMUSG00000034212	1	94766706	94799483
Dusp28	ENSMUSG00000047067	1	94803566	94805197
Rnpepl1	ENSMUSG00000026269	1	94807982	94817415
Capn10	ENSMUSG00000026270	1	94830953	94844518
Gpr35	ENSMUSG00000026271	1	94869696	94882968
Aqp12	ENSMUSG00000045091	1	94902911	94908846
Kif1a	ENSMUSG00000014602	1	94912033	94998442
Gm17672	ENSMUSG00000090847	1	95005394	95007262
Agxt	ENSMUSG00000026272	1	95031822	95041984
2310007B03Rik	ENSMUSG00000034159	1	95047926	95057525
E030010N08Rik	ENSMUSG00000084989	1	95112476	95127649
Sned1	ENSMUSG00000047793	1	95132418	95197642
Mterfd2	ENSMUSG00000026273	1	95195788	95202492
Pask	ENSMUSG00000026274	1	95205347	95240059
5033417F24Rik	ENSMUSG00000091828	1	94804957	94807341
Mir149	ENSMUSG00000065470	1	94746955	94747020
Ppp1r7	ENSMUSG00000026275	1	95239431	95270066
U6	ENSMUSG00000064389	1	95259832	95259934
Ano7	ENSMUSG00000034107	1	95270473	95300079
Hdlbp	ENSMUSG00000034088	1	95302517	95375385
Gm17415	ENSMUSG00000090489	1	95318265	95319065
Sept2	ENSMUSG00000026276	1	95375541	95406837
Farp2	ENSMUSG00000034066	1	95408656	95518553
Stk25	ENSMUSG00000026277	1	95518479	95532299
Bok	ENSMUSG00000026278	1	95582271	95592339
Thap4	ENSMUSG00000026279	1	95601968	95651415
AC131316.1	ENSMUSG00000093284	1	95549077	95549367
Atg4b	ENSMUSG00000026280	1	95648077	95686372
Dtymk	ENSMUSG00000026281	1	95689153	95698511
Ing5	ENSMUSG00000026283	1	95700542	95718678
D2hgdh	ENSMUSG00000073609	1	95721817	95748925
Gal3st2	ENSMUSG00000034005	1	95757921	95773071
Gm9994	ENSMUSG00000056307	1	95824364	95839221
Gm7889	ENSMUSG00000091067	1	95879623	95882396
Gm6086	ENSMUSG00000073608	1	95887086	95908118
Neu4	ENSMUSG00000034000	1	95917070	95924903
Pdcd1	ENSMUSG00000026285	1	95934884	95949130
U6	ENSMUSG00000088961	1	95705147	95705248
Fam174a	ENSMUSG00000051185	1	97210205	97231861
St8sia4	ENSMUSG00000040710	1	97484261	97564171
Gm15427	ENSMUSG00000081051	1	97395142	97395805
AC102463.2	ENSMUSG00000077860	1	98163428	98163518
U7	ENSMUSG00000088333	1	97462119	97462181
U6	ENSMUSG00000064461	1	98513676	98513782
AC102463.1	ENSMUSG00000077014	1	98199723	98199832
U6	ENSMUSG00000065342	1	97728706	97728812
SNORA17	ENSMUSG00000089310	1	96936511	96936620
Slco4c1	ENSMUSG00000040693	1	98715361	98768748
Slco6b1	ENSMUSG00000045463	1	98808389	98894154
Slco6c1	ENSMUSG00000026331	1	98955615	99024830
D1Ertd622e	ENSMUSG00000044768	1	99540480	99558651
Ppip5k2	ENSMUSG00000040648	1	99602625	99666988
Gin1	ENSMUSG00000026333	1	99666749	99690286
Pam	ENSMUSG00000026335	1	99691691	99992223
Slco6b1	ENSMUSG00000090974	1	98802753	98894154
Gm6430	ENSMUSG00000044757	1	98921090	98923123
Gm3531	ENSMUSG00000089782	1	99845478	99845966
Gm5101	ENSMUSG00000092052	1	98768798	98777807
7SK	ENSMUSG00000089169	1	99832977	99833288
SNORA17	ENSMUSG00000077255	1	98658608	98658735
Cntnap5b	ENSMUSG00000067028	1	101669342	102382519
Gm7110	ENSMUSG00000082431	1	101687006	101687602
SNORA17	ENSMUSG00000087883	1	102149494	102149625
U6	ENSMUSG00000087804	1	100913941	100914040
SNORA17	ENSMUSG00000087908	1	104849992	104850125
SNORA17	ENSMUSG00000077295	1	104003026	104003157
SNORA17	ENSMUSG00000088594	1	105133203	105133344
SNORA17	ENSMUSG00000088510	1	104310500	104310598
7SK	ENSMUSG00000088161	1	106382534	106382863
Cdh20	ENSMUSG00000050840	1	106665106	106892058
Rnf152	ENSMUSG00000047496	1	107173494	107253287
Pign	ENSMUSG00000056536	1	107417716	107555585
2310035C23Rik	ENSMUSG00000026319	1	107560438	107651708
Tnfrsf11a	ENSMUSG00000026321	1	107677300	107744558
Gm17634	ENSMUSG00000090759	1	107252584	107258201
Gm3608	ENSMUSG00000067017	1	107352560	107353433
Gm10193	ENSMUSG00000067015	1	107661021	107661251
Gm15699	ENSMUSG00000089866	1	106808008	106808910
U7	ENSMUSG00000089332	1	106793128	106793191
n-R5s216	ENSMUSG00000084704	1	106777501	106777612
AC101970.1	ENSMUSG00000080661	1	106641247	106641336
AC132082.1	ENSMUSG00000076999	1	107471264	107471359
SNORA17	ENSMUSG00000089037	1	111519585	111519714
7SK	ENSMUSG00000084741	1	111701337	111701621
Epb4.1l5	ENSMUSG00000026383	1	121441610	121545577
Ptpn4	ENSMUSG00000026384	1	121554621	121734190
Tmem177	ENSMUSG00000036975	1	121804467	121809785
Gm101	ENSMUSG00000036962	1	121819918	121893811
Sctr	ENSMUSG00000026387	1	121903557	121960105
Tmem37	ENSMUSG00000050777	1	121963954	121970651
Dbi	ENSMUSG00000026385	1	122009857	122017655
3110009E18Rik	ENSMUSG00000026388	1	122017764	122084766
Steap3	ENSMUSG00000026389	1	122087334	122169282
C1ql2	ENSMUSG00000036907	1	122237159	122239748
Marco	ENSMUSG00000026390	1	122371115	122401661
En1	ENSMUSG00000058665	1	122498995	122505873
Insig2	ENSMUSG00000003721	1	123200930	123229166
Ccdc93	ENSMUSG00000026339	1	123327626	123403037
Htr5b	ENSMUSG00000050534	1	123406419	123425042
B230209K01Rik	ENSMUSG00000086664	1	122983982	123017533
Gm3851	ENSMUSG00000091876	1	121684346	121684663
Gm8338	ENSMUSG00000090277	1	121714340	121714702
Gm17973	ENSMUSG00000092245	1	121883372	121883891
Gm15392	ENSMUSG00000085857	1	123385873	123389780
Gm15393	ENSMUSG00000083582	1	123404162	123404380
Gm8217	ENSMUSG00000081130	1	123417160	123417624
Dpp10	ENSMUSG00000036815	1	125228716	125942136
Actr3	ENSMUSG00000026341	1	127289483	127332067
Slc35f5	ENSMUSG00000026342	1	127457593	127492261
Gpr39	ENSMUSG00000026343	1	127573572	127770439
Gm10543	ENSMUSG00000073586	1	125941400	125942989
U6	ENSMUSG00000065340	1	126387433	126387536
Lypd1	ENSMUSG00000026344	1	127764199	127809678
Nckap5	ENSMUSG00000049690	1	127810197	128727376
AC164156.1	ENSMUSG00000080345	1	128364712	128364801
Mgat5	ENSMUSG00000036155	1	129101563	129380281
Tmem163	ENSMUSG00000026347	1	129383123	129574673
AC131793.1	ENSMUSG00000093146	1	129228389	129228518
snoU6-53	ENSMUSG00000065687	1	129271708	129271816
Acmsd	ENSMUSG00000026348	1	129625990	129664141
Ccnt2	ENSMUSG00000026349	1	129670741	129704638
Ysk4	ENSMUSG00000051590	1	129711848	129736867
Rab3gap1	ENSMUSG00000036104	1	129765350	129840445
Zranb3	ENSMUSG00000036086	1	129850761	129999624
R3hdm1	ENSMUSG00000056211	1	129999883	130134312
Ubxn4	ENSMUSG00000026353	1	130140758	130175954
Lct	ENSMUSG00000026354	1	130181333	130224895
Mcm6	ENSMUSG00000026355	1	130228168	130256233
Dars	ENSMUSG00000026356	1	130260285	130313993
Cxcr4	ENSMUSG00000045382	1	130484776	130488870
Thsd7b	ENSMUSG00000042581	1	131169879	132115855
Rpl28-ps1	ENSMUSG00000058603	1	129935146	129935559
Gm17699	ENSMUSG00000091877	1	130667176	130670998
Mir128-1	ENSMUSG00000065520	1	130098932	130099013
SNORA70	ENSMUSG00000088196	1	130386617	130386750
U6	ENSMUSG00000064737	1	130782486	130782596
U6	ENSMUSG00000088432	1	130411692	130411796
Pm20d1	ENSMUSG00000042251	1	133693958	133718050
Slc41a1	ENSMUSG00000013275	1	133724070	133745442
Rab7l1	ENSMUSG00000026433	1	133763801	133769464
Nucks1	ENSMUSG00000026434	1	133807035	133832898
Slc45a3	ENSMUSG00000026435	1	133867186	133879540
Elk4	ENSMUSG00000026436	1	133904184	133929189
Mfsd4	ENSMUSG00000059149	1	133919383	133964639
Cdk18	ENSMUSG00000026437	1	134010127	134036262
Lemd1	ENSMUSG00000079330	1	134088013	134153958
Gm10188	ENSMUSG00000066936	1	134125625	134126344
Klhdc8a	ENSMUSG00000042115	1	134195203	134203934
Nuak2	ENSMUSG00000009772	1	134212703	134230065
Tmcc2	ENSMUSG00000042066	1	134252892	134287858
Dstyk	ENSMUSG00000042046	1	134314030	134363536
Rbbp5	ENSMUSG00000026439	1	134373944	134402242
Tmem81	ENSMUSG00000048174	1	134402807	134405214
Cntn2	ENSMUSG00000053024	1	134406002	134439517
Nfasc	ENSMUSG00000026442	1	134461268	134638374
Lrrn2	ENSMUSG00000026443	1	134776850	134836582
Mdm4	ENSMUSG00000054387	1	134886422	134921943
Pik3c2b	ENSMUSG00000026447	1	134942244	135005264
Ppp1r15b	ENSMUSG00000046062	1	135027720	135036377
Plekha6	ENSMUSG00000041757	1	135142674	135200012
Golt1a	ENSMUSG00000041717	1	135206400	135219603
Kiss1	ENSMUSG00000091251	1	135218452	135226478
Ren1	ENSMUSG00000070645	1	135247087	135256902
Etnk2	ENSMUSG00000070644	1	135260149	135276913
Sox13	ENSMUSG00000070643	1	135278880	135320954
Snrpe	ENSMUSG00000090553	1	135500448	135506868
Zc3h11a	ENSMUSG00000026464	1	135516448	135557957
Lax1	ENSMUSG00000051998	1	135575606	135586685
Gm17678	ENSMUSG00000091176	1	135598216	135598458
Atp2b4	ENSMUSG00000026463	1	135599255	135697618
1700037F24Rik	ENSMUSG00000091344	1	134097646	134100380
Gm17288	ENSMUSG00000091310	1	133933382	133964522
6030442K20Rik	ENSMUSG00000090678	1	134363010	134373622
Gm17713	ENSMUSG00000092104	1	135506988	135510999
Gm7241	ENSMUSG00000089808	1	134181024	134181386
Gm15849	ENSMUSG00000090079	1	134277706	134279086
SNORA32	ENSMUSG00000064814	1	135497800	135497932
AC161805.1	ENSMUSG00000092700	1	133722552	133722622
SNORA17	ENSMUSG00000088911	1	134710805	134710925
U6	ENSMUSG00000088779	1	133997216	133997331
Mir135b	ENSMUSG00000065435	1	134094665	134094761
Optc	ENSMUSG00000010311	1	135793773	135804576
Prelp	ENSMUSG00000041577	1	135806881	135817991
Fmod	ENSMUSG00000041559	1	135933831	135944854
Btg2	ENSMUSG00000020423	1	135971747	135975697
Gm8618	ENSMUSG00000073559	1	136005915	136006417
Chit1	ENSMUSG00000026450	1	136007819	136048117
Chi3l1	ENSMUSG00000064246	1	136078753	136086758
Mybph	ENSMUSG00000042451	1	136090025	136097808
Adora1	ENSMUSG00000042429	1	136095800	136132008
Myog	ENSMUSG00000026459	1	136186581	136189124
Ppfia4	ENSMUSG00000026458	1	136193360	136229505
Tmem183a	ENSMUSG00000042305	1	136242674	136258576
4933406M09Rik	ENSMUSG00000050526	1	136282517	136287560
Cyb5r1	ENSMUSG00000026456	1	136302358	136308317
Adipor1	ENSMUSG00000026457	1	136311955	136329928
Gm15851	ENSMUSG00000090208	1	135803108	135811399
U6	ENSMUSG00000084509	1	136177462	136177568
Kif14	ENSMUSG00000041498	1	138364535	138428088
Zfp281	ENSMUSG00000041483	1	138521478	138526630
Nr5a2	ENSMUSG00000026398	1	138740161	138857004
A130050O07Rik	ENSMUSG00000051480	1	139824747	139826850
Ptprc	ENSMUSG00000026395	1	139959438	140071882
Atp6v1g3	ENSMUSG00000026394	1	140170315	140186037
Gm17718	ENSMUSG00000091667	1	138518675	138521227
Gm16880	ENSMUSG00000085011	1	138592788	138622305
Mir181b-1	ENSMUSG00000065458	1	139863216	139863295
5S_rRNA	ENSMUSG00000088564	1	139884234	139884353
SNORA17	ENSMUSG00000088164	1	139263728	139263824
U7	ENSMUSG00000088970	1	138886788	138886847
U6	ENSMUSG00000077207	1	139112121	139112224
Mir181a-1	ENSMUSG00000065565	1	139863032	139863118
AC125186.2	ENSMUSG00000093144	1	138654087	138654186
AC125186.1	ENSMUSG00000092912	1	138593951	138594048
SNORA17	ENSMUSG00000088715	1	139630895	139631010
Nek7	ENSMUSG00000026393	1	140381291	140516273
Lhx9	ENSMUSG00000019230	1	140721763	140745153
2310009B15Rik	ENSMUSG00000079283	1	140748556	140753431
n-R5s217	ENSMUSG00000065275	1	140774839	140774954
Dennd1b	ENSMUSG00000056268	1	140860013	141072620
Crb1	ENSMUSG00000063681	1	141093633	141273677
Zbtb41	ENSMUSG00000033964	1	141318960	141349582
Aspm	ENSMUSG00000033952	1	141351350	141390667
F13b	ENSMUSG00000026368	1	141398284	141420333
Cfhr1	ENSMUSG00000057037	1	141443639	141456835
4930596I21Rik	ENSMUSG00000086113	1	140874234	140875817
Gm16305	ENSMUSG00000085361	1	140888127	140888598
Gm16304	ENSMUSG00000085481	1	141030468	141031242
Cfhr3	ENSMUSG00000090623	1	141471762	141524888
U6	ENSMUSG00000088974	1	141568181	141568284
Gm4788	ENSMUSG00000070594	1	141594212	141677816
U6	ENSMUSG00000084570	1	141683560	141683663
Cfhr2	ENSMUSG00000033898	1	141701945	141915481
Gm16332	ENSMUSG00000089991	1	141758779	141833046
Gm5834	ENSMUSG00000085867	1	141836178	141890782
SNORA55	ENSMUSG00000087930	1	141900402	141900543
Cfh	ENSMUSG00000026365	1	141982432	142079988
Kcnt2	ENSMUSG00000052726	1	142142793	142508640
Pla2g4a	ENSMUSG00000056220	1	151676748	151808420
Ptgs2	ENSMUSG00000032487	1	151947254	151955140
Pdc	ENSMUSG00000006007	1	152166547	152181035
BC003331	ENSMUSG00000006010	1	152208435	152240210
Tpr	ENSMUSG00000006005	1	152239968	152297065
Prg4	ENSMUSG00000006014	1	152296542	152313295
Gm17311	ENSMUSG00000091113	1	152006173	152012078
7530420F21Rik	ENSMUSG00000084952	1	151922003	151947004
Gm15443	ENSMUSG00000082588	1	150872358	150873177
Gm15453	ENSMUSG00000081535	1	152112665	152113129
U6	ENSMUSG00000088167	1	151554507	151554612
n-R5s219	ENSMUSG00000077516	1	151688660	151688791
n-R5s218	ENSMUSG00000084532	1	151581880	151581988
Hmcn1	ENSMUSG00000066842	1	152410657	152840565
Ska2l-ps	ENSMUSG00000057399	1	152396447	152396809
RP23-454G7.1	ENSMUSG00000093650	1	152472395	152630629
Ivns1abp	ENSMUSG00000023150	1	153191628	153211575
1200016B10Rik	ENSMUSG00000052748	1	153214829	153275585
1190005F20Rik	ENSMUSG00000053286	1	153275778	153305312
Rnf2	ENSMUSG00000026484	1	153316536	153347953
Fam129a	ENSMUSG00000026483	1	153418316	153569069
Edem3	ENSMUSG00000043019	1	153602504	153669458
1700025G04Rik	ENSMUSG00000032666	1	153731654	153937450
Gm10138	ENSMUSG00000063886	1	153191499	153191866
U4	ENSMUSG00000084557	1	153701953	153702085
U6	ENSMUSG00000065624	1	152909134	152909240
U2	ENSMUSG00000088498	1	153107954	153108044
Y_RNA	ENSMUSG00000089221	1	153160677	153160758
Tsen15	ENSMUSG00000014980	1	154217865	154233818
Glt25d2	ENSMUSG00000032649	1	154246960	154357825
Rgl1	ENSMUSG00000026482	1	154363889	154613481
Apobec4	ENSMUSG00000055547	1	154597681	154604674
Arpc5	ENSMUSG00000008475	1	154613672	154622727
Gm15618	ENSMUSG00000080878	1	154254204	154254655
Gm15479	ENSMUSG00000086145	1	154531156	154534631
Gm7278	ENSMUSG00000080950	1	154576289	154577689
Ncf2	ENSMUSG00000026480	1	154655020	154684120
Smg7	ENSMUSG00000042772	1	154684126	154749776
Nmnat2	ENSMUSG00000042751	1	154802231	154966390
Lamc2	ENSMUSG00000026479	1	154969886	155033577
Lamc1	ENSMUSG00000026478	1	155066052	155179916
E330020D12Rik	ENSMUSG00000073538	1	155251957	155255726
Gm8818	ENSMUSG00000079138	1	155152562	155153608
1700012A16Rik	ENSMUSG00000042708	1	155272292	155299704
Dhx9	ENSMUSG00000042699	1	155302888	155334790
Npl	ENSMUSG00000042684	1	155350146	155396844
SNORA4	ENSMUSG00000064435	1	155287209	155287348
Rgs8	ENSMUSG00000042671	1	155500155	155544797
Rgs16	ENSMUSG00000026475	1	155587479	155592598
Rnasel	ENSMUSG00000066800	1	155596556	155611351
Rgsl1	ENSMUSG00000042641	1	155626511	155691272
5830403L16Rik	ENSMUSG00000045968	1	155696672	155747338
Gm5531	ENSMUSG00000043282	1	155721475	155724001
Teddm1	ENSMUSG00000047053	1	155738776	155740190
Glul	ENSMUSG00000026473	1	155747074	155756853
A930039A15Rik	ENSMUSG00000078493	1	155752431	155764040
Gm11074	ENSMUSG00000079255	1	155752801	155764441
Zfp648	ENSMUSG00000066797	1	156051227	156052804
Cacna1e	ENSMUSG00000004110	1	156239649	156573049
SNORA17	ENSMUSG00000088669	1	155927225	155927329
n-R5s220	ENSMUSG00000064860	1	156158538	156158657
Ier5	ENSMUSG00000056708	1	156943497	156946766
Mr1	ENSMUSG00000026471	1	156975008	156993910
Stx6	ENSMUSG00000026470	1	157005833	157050647
BC034090	ENSMUSG00000033722	1	157059603	157079870
Xpr1	ENSMUSG00000026469	1	157122831	157264545
Gm9530	ENSMUSG00000086217	1	156910653	156930396
AC116712.1	ENSMUSG00000093286	1	157163096	157163219
Rasal2	ENSMUSG00000070565	1	159065314	159342726
2810025M15Rik	ENSMUSG00000049881	1	159342483	159350366
BC026585	ENSMUSG00000033488	1	159388711	159419191
Sec16b	ENSMUSG00000026589	1	159436859	159498556
Fam5b	ENSMUSG00000004031	1	160175402	160286391
Astn1	ENSMUSG00000026587	1	160292471	160621917
Pappa2	ENSMUSG00000073530	1	160641862	160887870
1600012P17Rik	ENSMUSG00000047661	1	160888258	160910621
Gm6058	ENSMUSG00000087632	1	159314062	159314460
Gm15486	ENSMUSG00000087093	1	159428006	159441852
Mir488	ENSMUSG00000070103	1	160435756	160435864
Gm4953	ENSMUSG00000061992	1	161098288	161098773
Rfwd2	ENSMUSG00000040782	1	161162457	161277711
AC084287.1	ENSMUSG00000080410	1	161261927	161262009
Scarna3a	ENSMUSG00000089536	1	161270414	161270553
Gm10530	ENSMUSG00000073528	1	161544880	161615006
Tnr	ENSMUSG00000015829	1	161667641	161855053
4930523C07Rik	ENSMUSG00000090394	1	161974515	162008559
4930523C07Rik	ENSMUSG00000050883	1	161974715	162001640
4930562F07Rik	ENSMUSG00000026729	1	162004866	162008116
Tnn	ENSMUSG00000026725	1	162015165	162083711
Mrps14	ENSMUSG00000058267	1	162125346	162132301
Cacybp	ENSMUSG00000014226	1	162133056	162142908
Rabgap1l	ENSMUSG00000026721	1	162149305	162723069
Gm6177	ENSMUSG00000057499	1	162823251	162823715
Rc3h1	ENSMUSG00000040423	1	162836549	162905109
Serpinc1	ENSMUSG00000026715	1	162908737	162933141
Zbtb37	ENSMUSG00000043467	1	162938925	162964980
Dars2	ENSMUSG00000026709	1	162970732	163000789
Cenpl	ENSMUSG00000026708	1	163000898	163016855
Klhl20	ENSMUSG00000026705	1	163018506	163061642
Ankrd45	ENSMUSG00000044835	1	163072822	163099237
Prdx6	ENSMUSG00000026701	1	163170243	163181350
Tnfsf4	ENSMUSG00000026700	1	163325581	163348337
Gm10529	ENSMUSG00000073527	1	162005293	162005672
Gas5	ENSMUSG00000053332	1	162964553	162968670
4930469G21Rik	ENSMUSG00000049160	1	163084689	163089445
SNORD44	ENSMUSG00000084667	1	162966813	162966872
SNORD24	ENSMUSG00000064816	1	162966188	162966270
SNORD77	ENSMUSG00000065735	1	162967732	162967812
SNORD78	ENSMUSG00000077220	1	162967115	162967180
SNORD74	ENSMUSG00000064440	1	162965525	162965604
SNORD75	ENSMUSG00000080463	1	162965981	162966042
SNORD79	ENSMUSG00000065160	1	162967487	162967570
Mir1927	ENSMUSG00000089204	1	162225995	162226103
SNORA17	ENSMUSG00000088145	1	161913627	161913736
SNORD81	ENSMUSG00000065228	1	162968439	162968514
SNORA17	ENSMUSG00000077759	1	162575704	162575835
SNORA26	ENSMUSG00000077648	1	162806333	162806453
Snord47	ENSMUSG00000064968	1	162968213	162968289
Tnfsf18	ENSMUSG00000066755	1	163424786	163435421
Fasl	ENSMUSG00000000817	1	163710820	163718626
AI848100	ENSMUSG00000040297	1	163746243	163806792
4930558K02Rik	ENSMUSG00000086277	1	163872217	163909767
Pigc	ENSMUSG00000026698	1	163899317	163957237
Dnm3	ENSMUSG00000040265	1	163912584	164408165
Gm10176	ENSMUSG00000066752	1	164407811	164410074
Mettl13	ENSMUSG00000026694	1	164462258	164478682
Vamp4	ENSMUSG00000026696	1	164500646	164529215
Gm5705	ENSMUSG00000091743	1	164558488	164559114
Myoc	ENSMUSG00000026697	1	164569281	164579824
7420461P10Rik	ENSMUSG00000091060	1	164577334	164588304
Prrc2c	ENSMUSG00000040225	1	164603533	164670681
Fmo4	ENSMUSG00000026692	1	164724014	164744103
Fmo1	ENSMUSG00000040181	1	164759692	164796679
Fmo2	ENSMUSG00000040170	1	164804448	164828857
Fmo3	ENSMUSG00000026691	1	164883933	164914659
4921528O07Rik	ENSMUSG00000071890	1	164954433	165015801
Gm15429	ENSMUSG00000040323	1	163656373	163657620
2810442N19Rik	ENSMUSG00000090260	1	163935100	163946625
Dnm3os	ENSMUSG00000078190	1	164147754	164155681
Gm16101	ENSMUSG00000089933	1	164246223	164246652
5S_rRNA	ENSMUSG00000089353	1	163482680	163482797
Mir214	ENSMUSG00000065516	1	164153499	164153608
AC157798.1	ENSMUSG00000093181	1	164080498	164080693
Mir199a-2	ENSMUSG00000070126	1	164147945	164148054
SNORA17	ENSMUSG00000077608	1	164984949	164985082
SNORA40	ENSMUSG00000089174	1	165048358	165048479
Prrx1	ENSMUSG00000026586	1	165175247	165243841
Gorab	ENSMUSG00000040124	1	165315040	165333772
Gm17698	ENSMUSG00000090335	1	165231921	165233751
Gm20471	ENSMUSG00000092188	1	165210487	165217176
U6atac	ENSMUSG00000088951	1	165332414	165332521
Mettl11b	ENSMUSG00000040113	1	165632388	165655363
Kifap3	ENSMUSG00000026585	1	165709714	165847240
Scyl3	ENSMUSG00000026584	1	165859231	165885257
Gm2343	ENSMUSG00000089700	1	165659700	165660741
BC055324	ENSMUSG00000041406	1	165876124	165924927
2810422O20Rik	ENSMUSG00000041396	1	165925020	165927374
Sele	ENSMUSG00000026582	1	165978365	165987808
Sell	ENSMUSG00000026581	1	165992207	166010916
Selp	ENSMUSG00000026580	1	166045395	166080157
Gm16587	ENSMUSG00000090081	1	166073563	166076497
F5	ENSMUSG00000026579	1	166081969	166150408
Gm16548	ENSMUSG00000086593	1	166078722	166082348
Gm16588	ENSMUSG00000089790	1	166096710	166097064
Slc19a2	ENSMUSG00000040918	1	166179177	166195516
4930455F23Rik	ENSMUSG00000026578	1	166205716	166217978
Blzf1	ENSMUSG00000026577	1	166219931	166237620
Nme7	ENSMUSG00000026575	1	166243010	166334805
Atp1b1	ENSMUSG00000026576	1	166367398	166388486
Gm16608	ENSMUSG00000086116	1	166433438	166445013
Dpt	ENSMUSG00000026574	1	166726863	166754397
Xcl1	ENSMUSG00000026573	1	166861775	166865658
AC133891.1	ENSMUSG00000080561	1	166954476	166954587
Tbx19	ENSMUSG00000026572	1	167067986	167090904
Gm16550	ENSMUSG00000089967	1	167078955	167079080
Sft2d2	ENSMUSG00000040848	1	167104472	167124564
Tiprl	ENSMUSG00000040843	1	167145053	167167074
Gpr161	ENSMUSG00000040836	1	167232756	167253061
Dcaf6	ENSMUSG00000026571	1	167259642	167390596
Brp44	ENSMUSG00000026568	1	167391168	167411345
SNORA17	ENSMUSG00000089299	1	167370756	167370840
Adcy10	ENSMUSG00000026567	1	167415314	167506905
7SK	ENSMUSG00000087886	1	167428130	167428380
SNORA18	ENSMUSG00000089291	1	167501981	167502107
Mpzl1	ENSMUSG00000026566	1	167522312	167564672
Rcsd1	ENSMUSG00000040723	1	167579076	167638225
Creg1	ENSMUSG00000040713	1	167693877	167705439
Cd247	ENSMUSG00000005763	1	167718812	167807407
Gm16565	ENSMUSG00000089829	1	167711206	167719498
5S_rRNA	ENSMUSG00000088618	1	167715965	167716082
U6	ENSMUSG00000070191	1	167739767	167739873
Pou2f1	ENSMUSG00000026565	1	167795285	167932809
Gm17444	ENSMUSG00000091458	1	167933089	167968389
Dusp27	ENSMUSG00000026564	1	168028284	168058029
Gpa33	ENSMUSG00000000544	1	168060369	168096641
Mael	ENSMUSG00000040629	1	168131516	168168875
Ildr2	ENSMUSG00000040612	1	168184270	168246954
5330438I03Rik	ENSMUSG00000091393	1	168236872	168239716
Tada1	ENSMUSG00000026563	1	168309228	168323752
Pogk	ENSMUSG00000040596	1	168314753	168339994
Gm15853	ENSMUSG00000089853	1	168309970	168310624
Gm16418	ENSMUSG00000084093	1	168361836	168362006
Gm4846	ENSMUSG00000086056	1	168413744	168427719
Gm4847	ENSMUSG00000051081	1	168559102	168577824
mmu-mir-1194	ENSMUSG00000080682	1	168550493	168550613
Fmo9	ENSMUSG00000026560	1	168592186	168611976
Gm4954	ENSMUSG00000085841	1	168692276	168700616
Gm6286	ENSMUSG00000086925	1	168875728	168876489
Gm16701	ENSMUSG00000086622	1	168904155	168930972
Fam78b	ENSMUSG00000060568	1	168931548	169021433
Uck2	ENSMUSG00000053664	1	169153958	169154050
Uck2	ENSMUSG00000026558	1	169156221	169215258
Tmco1	ENSMUSG00000052428	1	169238801	169264109
mmu-mir-2134-1	ENSMUSG00000088246	1	169270500	169270555
Aldh9a1	ENSMUSG00000026687	1	169280122	169298661
U6	ENSMUSG00000064426	1	169279156	169279262
Mgst3	ENSMUSG00000026688	1	169302097	169323972
Lrrc52	ENSMUSG00000040485	1	169375806	169396911
Rxrg	ENSMUSG00000015843	1	169528515	169569754
Lmx1a	ENSMUSG00000026686	1	169619370	169778872
Pbx1	ENSMUSG00000052534	1	170050130	170362401
RP23-45N11.1	ENSMUSG00000093538	1	170045375	170052596
Uhmk1	ENSMUSG00000026667	1	172123551	172145528
4930500M09Rik	ENSMUSG00000044306	1	172144991	172145687
Sh2d1b2	ENSMUSG00000073494	1	172162880	172183739
Sh2d1b1	ENSMUSG00000026673	1	172207507	172216900
Gm7694	ENSMUSG00000079188	1	172231277	172232958
Nos1ap	ENSMUSG00000038473	1	172232799	172519992
1700015E13Rik	ENSMUSG00000042800	1	172238934	172242256
Olfml2b	ENSMUSG00000038463	1	172574663	172612920
Atf6	ENSMUSG00000026663	1	172634588	172797902
Dusp12	ENSMUSG00000026659	1	172803629	172815671
Fcrlb	ENSMUSG00000070524	1	172837404	172843072
Fcrla	ENSMUSG00000038421	1	172847707	172857714
Fcgr2b	ENSMUSG00000026656	1	172890689	172906678
Fcgr4	ENSMUSG00000059089	1	172949051	172959892
Fcgr3	ENSMUSG00000059498	1	172981300	172995066
1700009P17Rik	ENSMUSG00000026649	1	173044049	173057098
Sdhc	ENSMUSG00000058076	1	173057296	173080734
Mpz	ENSMUSG00000056569	1	173080842	173091261
Pcp4l1	ENSMUSG00000038370	1	173103393	173126399
Nr1i3	ENSMUSG00000005677	1	173144101	173150832
Tomm40l	ENSMUSG00000005674	1	173147933	173152645
Apoa2	ENSMUSG00000005681	1	173155185	173156510
Fcer1g	ENSMUSG00000058715	1	173159703	173164496
Ndufs2	ENSMUSG00000013593	1	173164984	173177253
Adamts4	ENSMUSG00000006403	1	173180552	173190768
B4galt3	ENSMUSG00000052423	1	173200459	173207027
Ppox	ENSMUSG00000062729	1	173206121	173211317
Usp21	ENSMUSG00000053483	1	173212076	173218122
Ufc1	ENSMUSG00000062963	1	173218694	173225155
Rpl27-ps1	ENSMUSG00000079137	1	173235215	173235625
Dedd	ENSMUSG00000013973	1	173259276	173272462
Nit1	ENSMUSG00000013997	1	173268139	173275777
Pfdn2	ENSMUSG00000006412	1	173275801	173289385
Klhdc9	ENSMUSG00000045259	1	173288577	173290929
Pvrl4	ENSMUSG00000006411	1	173300230	173318729
Arhgap30	ENSMUSG00000048865	1	173319085	173340429
Usf1	ENSMUSG00000026641	1	173341444	173349273
Tstd1	ENSMUSG00000091166	1	173349164	173350483
F11r	ENSMUSG00000038235	1	173367666	173394734
B930036N10Rik	ENSMUSG00000091993	1	173432927	173434242
Alyref2	ENSMUSG00000060244	1	173433609	173434881
Gm9765	ENSMUSG00000038218	1	173445364	173447053
Itln1	ENSMUSG00000038209	1	173448253	173465425
Cd244	ENSMUSG00000004709	1	173489324	173515449
Ly9	ENSMUSG00000004707	1	173518755	173537541
Slamf7	ENSMUSG00000038179	1	173562534	173579149
Cd48	ENSMUSG00000015355	1	173612140	173635389
Slamf1	ENSMUSG00000015316	1	173697258	173731315
Cd84	ENSMUSG00000038147	1	173769828	173820849
Gm10521	ENSMUSG00000073492	1	173825795	173828368
Slamf6	ENSMUSG00000015314	1	173847646	173879083
Vangl2	ENSMUSG00000026556	1	173931091	173958575
Nhlh1	ENSMUSG00000051251	1	173982423	173987704
Ncstn	ENSMUSG00000003458	1	173996144	174012926
Copa	ENSMUSG00000026553	1	174012660	174052461
Pex19	ENSMUSG00000003464	1	174056886	174066624
Dcaf8	ENSMUSG00000026554	1	174078146	174126524
Gm9929	ENSMUSG00000053925	1	172798776	172811852
Gm2962	ENSMUSG00000089838	1	172855440	172855775
Gm15431	ENSMUSG00000059058	1	173641219	173641413
Gm10171	ENSMUSG00000089803	1	174074403	174075032
Gm17520	ENSMUSG00000092117	1	173353316	173367449
U6	ENSMUSG00000064448	1	172762896	172763002
U5	ENSMUSG00000065033	1	173433179	173433294
U6	ENSMUSG00000065390	1	173663430	173663536
SNORA40	ENSMUSG00000087747	1	173238178	173238268
U6	ENSMUSG00000064611	1	172681848	172681954
U6	ENSMUSG00000088291	1	173662191	173662245
U1	ENSMUSG00000065905	1	172958096	172958260
Pea15a	ENSMUSG00000013698	1	174126859	174136935
Casq1	ENSMUSG00000007122	1	174140025	174150026
Atp1a4	ENSMUSG00000007107	1	174153644	174188545
Igsf8	ENSMUSG00000038034	1	174191772	174249972
Atp1a2	ENSMUSG00000007097	1	174201840	174228195
Kcnj9	ENSMUSG00000038026	1	174251164	174259394
Kcnj10	ENSMUSG00000044708	1	174271341	174304216
Pigm	ENSMUSG00000050229	1	174306662	174314230
Gm17224	ENSMUSG00000092085	1	174143152	174143811
Slamf9	ENSMUSG00000026548	1	174405489	174408706
Igsf9	ENSMUSG00000037995	1	174411919	174429009
Tagln2	ENSMUSG00000026547	1	174430178	174437511
Ccdc19	ENSMUSG00000026546	1	174451175	174476001
Vsig8	ENSMUSG00000049598	1	174486069	174493848
Slamf8	ENSMUSG00000053318	1	174511508	174520699
Fcrl6	ENSMUSG00000070504	1	174526771	174532682
4933439K11Rik	ENSMUSG00000085184	1	174468264	174488260
Dusp23	ENSMUSG00000026544	1	174560900	174563105
Crp	ENSMUSG00000037942	1	174628187	174630097
Apcs	ENSMUSG00000026542	1	174824093	174825185
Olfr16	ENSMUSG00000037924	1	174886899	174887948
7SK	ENSMUSG00000088813	1	174614646	174614972
SNORA17	ENSMUSG00000077252	1	174866343	174866465
U6	ENSMUSG00000070182	1	174773665	174773769
Olfr1408	ENSMUSG00000062527	1	175060331	175061367
Olfr1406	ENSMUSG00000058981	1	175113573	175114635
Olfr218	ENSMUSG00000046643	1	175133489	175134430
Olfr1404	ENSMUSG00000049456	1	175145738	175146771
Olfr1407-ps1	ENSMUSG00000066680	1	175080262	175080503
Fcer1a	ENSMUSG00000005339	1	175151402	175157360
Olfr418-ps1	ENSMUSG00000049605	1	175200278	175201268
Gm11062	ENSMUSG00000079180	1	175204592	175207853
Darc	ENSMUSG00000037872	1	175262017	175263634
Cadm3	ENSMUSG00000005338	1	175264385	175297826
Aim2	ENSMUSG00000037860	1	175281010	175396171
Gm4955	ENSMUSG00000037849	1	175398640	175421172
BC094916	ENSMUSG00000070501	1	175449848	175466088
Pydc4	ENSMUSG00000073491	1	175497204	175529405
Pyhin1	ENSMUSG00000043263	1	175560990	175578059
Pydc3	ENSMUSG00000066677	1	175604042	175628523
AI607873	ENSMUSG00000073490	1	175653814	175671878
Ifi204	ENSMUSG00000073489	1	175677424	175697050
Gm16340	ENSMUSG00000090222	1	175705968	175732851
Mndal	ENSMUSG00000090272	1	175787352	175872622
Mnda	ENSMUSG00000026536	1	175826486	175843053
Ifi203	ENSMUSG00000039997	1	175850538	175872803
Ifi202b	ENSMUSG00000026535	1	175892700	175912975
Ifi205	ENSMUSG00000054203	1	175942129	175961886
Olfr433	ENSMUSG00000045381	1	175972064	175973067
Olfr432	ENSMUSG00000047048	1	175980506	175981444
Olfr430	ENSMUSG00000050134	1	175999431	176000384
Olfr429	ENSMUSG00000049528	1	176019169	176020111
Olfr427	ENSMUSG00000059371	1	176029591	176030538
Olfr231	ENSMUSG00000046486	1	176047222	176048145
Olfr424	ENSMUSG00000051528	1	176066877	176067824
Olfr421	ENSMUSG00000091950	1	176081612	176082661
Olfr420	ENSMUSG00000055033	1	176088853	176089898
Spna1	ENSMUSG00000026532	1	176102907	176178581
Olfr419	ENSMUSG00000050788	1	176180020	176181107
1810030J14Rik	ENSMUSG00000026531	1	176260649	176263004
Olfr417	ENSMUSG00000066672	1	176299050	176299979
Olfr248	ENSMUSG00000059503	1	176321177	176322186
Olfr414	ENSMUSG00000051509	1	176360561	176361515
Olfr220	ENSMUSG00000066671	1	176378756	176379733
Fmn2	ENSMUSG00000028354	1	176431956	176752848
Grem2	ENSMUSG00000050069	1	176763916	176851950
Rgs7	ENSMUSG00000026527	1	176989867	177421261
Fh1	ENSMUSG00000026526	1	177530505	177555766
Kmo	ENSMUSG00000039783	1	177550512	177592247
Opn3	ENSMUSG00000026525	1	177592552	177622907
Chml	ENSMUSG00000078185	1	177616619	177618484
Wdr64	ENSMUSG00000026523	1	177628724	177745865
Exo1	ENSMUSG00000039748	1	177810909	177841527
Pld5	ENSMUSG00000055214	1	177892437	178205443
B020018G12Rik	ENSMUSG00000078184	1	177907908	177909245
Cep170	ENSMUSG00000057335	1	178663784	178744198
Sdccag8	ENSMUSG00000026504	1	178744791	178950568
Gm15423	ENSMUSG00000087082	1	178858130	178862842
U6	ENSMUSG00000065666	1	177834676	177834782
AC144905.1	ENSMUSG00000093132	1	178809965	178810044
U2	ENSMUSG00000077794	1	177730645	177730820
7SK	ENSMUSG00000084749	1	178724087	178724351
Mir350	ENSMUSG00000065573	1	178702456	178702554
U6	ENSMUSG00000087875	1	178630748	178630855
Smyd3	ENSMUSG00000055067	1	180882091	181448172
Gm5561	ENSMUSG00000075392	1	181450388	181451039
Tfb2m	ENSMUSG00000026492	1	181458186	181476398
Cnst	ENSMUSG00000038949	1	181476501	181557609
Sccpdh	ENSMUSG00000038936	1	181598341	181617320
Gm1305	ENSMUSG00000087236	1	181625428	181675316
Ahctf1	ENSMUSG00000026491	1	181675025	181733811
Gm10518	ENSMUSG00000073486	1	181733507	181734807
Cdc42bpa	ENSMUSG00000026490	1	181890603	182095734
Adck3	ENSMUSG00000026489	1	182095369	182129733
Psen2	ENSMUSG00000010609	1	182157135	182193569
Gm5069	ENSMUSG00000055676	1	182257102	182260681
Itpkb	ENSMUSG00000038855	1	182260607	182354933
6330403A02Rik	ENSMUSG00000053963	1	182362518	182413598
Parp1	ENSMUSG00000026496	1	182499086	182531384
Lin9	ENSMUSG00000058729	1	182571498	182620816
Mixl1	ENSMUSG00000026497	1	182623174	182627165
Acbd3	ENSMUSG00000026499	1	182656174	182684334
H3f3a	ENSMUSG00000060743	1	182730963	182744074
BC031781	ENSMUSG00000038806	1	182781282	182798228
Lefty2	ENSMUSG00000066652	1	182823239	182829234
Pycr2	ENSMUSG00000026520	1	182834405	182838218
Lefty1	ENSMUSG00000038793	1	182865153	182868531
Gm17275	ENSMUSG00000090986	1	182732699	182739614
Gm15480	ENSMUSG00000082395	1	181468548	181469066
Gm16067	ENSMUSG00000073485	1	182743907	182746990
U6	ENSMUSG00000084558	1	182762900	182763007
AC167020.1	ENSMUSG00000092967	1	182663926	182664013
Tmem63a	ENSMUSG00000026519	1	182872475	182905243
Ephx1	ENSMUSG00000038776	1	182906286	182951035
9130409I23Rik	ENSMUSG00000038768	1	182981368	182990798
Nvl	ENSMUSG00000026516	1	183023554	183074288
Cnih4	ENSMUSG00000062169	1	183081062	183099125
Wdr26	ENSMUSG00000038733	1	183103359	183142109
A430110L20Rik	ENSMUSG00000054135	1	183156207	183158621
Cnih3	ENSMUSG00000026514	1	183282759	183390772
Ccdc121	ENSMUSG00000050625	1	183439764	183441582
2210411M09Rik	ENSMUSG00000085563	1	182882195	182888280
Rpl35a-ps2	ENSMUSG00000081214	1	183172076	183172498
Gm16547	ENSMUSG00000089888	1	183330595	183330887
Gm16539	ENSMUSG00000089927	1	183361854	183362531
Dnahc14	ENSMUSG00000047369	1	183669119	183699805
Lbr	ENSMUSG00000004880	1	183745447	183772532
Gm5533	ENSMUSG00000056699	1	183781739	183783320
Enah	ENSMUSG00000022995	1	183834576	183950111
U6	ENSMUSG00000064970	1	183743738	183743831
5S_rRNA	ENSMUSG00000089429	1	183770584	183770699
Srp9	ENSMUSG00000026511	1	184054868	184062538
Vmn1r1	ENSMUSG00000091013	1	184087275	184088450
Degs1	ENSMUSG00000038633	1	184205903	184212935
Fbxo28	ENSMUSG00000047539	1	184243233	184271737
Capn8	ENSMUSG00000038599	1	184495138	184562483
4922505E12Rik	ENSMUSG00000043429	1	184677388	184679253
Susd4	ENSMUSG00000038576	1	184693991	184826729
Tlr5	ENSMUSG00000079164	1	184884919	184906175
Gm8214	ENSMUSG00000090533	1	185505657	185506073
Dusp10	ENSMUSG00000039384	1	185837181	185899515
1700056E22Rik	ENSMUSG00000044854	1	185856911	185857453
Rpl21-ps1	ENSMUSG00000059483	1	186441127	186441609
U6	ENSMUSG00000089057	1	186403988	186404085
Hlx	ENSMUSG00000039377	1	186551019	186556498
Mosc1	ENSMUSG00000026621	1	186610655	186635192
Mosc2	ENSMUSG00000073481	1	186636947	186670330
C130074G19Rik	ENSMUSG00000039349	1	186695805	186707097
Mark1	ENSMUSG00000026620	1	186720322	186823428
Rab3gap2	ENSMUSG00000039318	1	187028047	187110622
Iars2	ENSMUSG00000026618	1	187108605	187153275
Bpnt1	ENSMUSG00000026617	1	187156028	187181656
4930488B22Rik	ENSMUSG00000092578	1	186536376	186542868
Snora36b	ENSMUSG00000077571	1	187066786	187066917
Mir194-1	ENSMUSG00000065581	1	187137198	187137264
Mir215	ENSMUSG00000065562	1	187137460	187137571
7SK	ENSMUSG00000088562	1	186681959	186682291
Mir1981	ENSMUSG00000088559	1	186646286	186646367
Eprs	ENSMUSG00000026615	1	187186974	187252234
Slc30a10	ENSMUSG00000026614	1	187278727	187292641
Gm2061	ENSMUSG00000085692	1	187270995	187279447
9630028B13Rik	ENSMUSG00000051295	1	187253236	187265698
4930532G15Rik	ENSMUSG00000091047	1	187183340	187186744
Lyplal1	ENSMUSG00000039246	1	187911610	187941189
5S_rRNA	ENSMUSG00000089363	1	187947080	187947185
Tgfb2	ENSMUSG00000039239	1	188447065	188529871
Rrp15	ENSMUSG00000001305	1	188544857	188573237
A430105J06Rik	ENSMUSG00000090488	1	188573275	188576800
SNORA70	ENSMUSG00000089045	1	188500621	188500755
Prkcq	ENSMUSG00000026778	2	11093740	11222853
Pfkfb3	ENSMUSG00000026773	2	11393057	11423728
Rbm17	ENSMUSG00000037197	2	11507066	11525780
Gm17355	ENSMUSG00000091689	2	11546914	11546967
Gm17490	ENSMUSG00000091312	2	11547233	11547891
Il2ra	ENSMUSG00000026770	2	11564419	11614818
Il15ra	ENSMUSG00000023206	2	11626914	11655613
Fbxo18	ENSMUSG00000058594	2	11664200	11699209
Ankrd16	ENSMUSG00000047909	2	11699503	11711952
Itga8	ENSMUSG00000026768	2	12028259	12223547
Fam188a	ENSMUSG00000026767	2	12268890	12341096
Gm13265	ENSMUSG00000081367	2	10820293	10820675
Gm13263	ENSMUSG00000082871	2	10880755	10881550
Gm13264	ENSMUSG00000085257	2	10958501	10970693
Gm13297	ENSMUSG00000081693	2	11012506	11013391
Gm13294	ENSMUSG00000083900	2	11021415	11021891
Gm13293	ENSMUSG00000086006	2	11261116	11264239
Gm13295	ENSMUSG00000080905	2	11274141	11274396
Gm13291	ENSMUSG00000086491	2	11306630	11308691
Gm13292	ENSMUSG00000082424	2	11330657	11331658
Gm13296	ENSMUSG00000082314	2	11341849	11342863
Gm13260	ENSMUSG00000082727	2	11529041	11529909
Gm13310	ENSMUSG00000080801	2	12004239	12005630
E030013I19Rik	ENSMUSG00000086843	2	12222574	12232927
Gm13321	ENSMUSG00000083547	2	12343252	12343650
SNORA68	ENSMUSG00000089007	2	10936389	10936517
U4	ENSMUSG00000084560	2	11009408	11009540
Nebl	ENSMUSG00000053702	2	17265536	17653091
H2afb1	ENSMUSG00000062651	2	17918049	17918573
A930004D18Rik	ENSMUSG00000054057	2	17946820	17959364
2810030E01Rik	ENSMUSG00000054074	2	17962303	17970678
Mllt10	ENSMUSG00000026743	2	17976898	18134017
Dnajc1	ENSMUSG00000026740	2	18117281	18314457
Commd3	ENSMUSG00000051154	2	18594011	18597858
Bmi1	ENSMUSG00000026739	2	18598645	18608256
Gm13334	ENSMUSG00000087182	2	18615659	18620664
BC061194	ENSMUSG00000037708	2	18620628	18672040
Pip4k2a	ENSMUSG00000026737	2	18763882	18919753
Gm13326	ENSMUSG00000082235	2	16900448	16901458
Gm13325	ENSMUSG00000081525	2	17090852	17091657
Gm13322	ENSMUSG00000085193	2	17103370	17107114
Gm13324	ENSMUSG00000085100	2	17480687	17481625
Gm13323	ENSMUSG00000081851	2	17718461	17719611
Gm13329	ENSMUSG00000081116	2	17919868	17920132
Gm13330	ENSMUSG00000085319	2	17954160	17961260
1810059C17Rik	ENSMUSG00000086340	2	17975820	17978240
Gm13351	ENSMUSG00000081619	2	18100656	18101069
Gm13350	ENSMUSG00000083070	2	18170992	18171470
Gm13349	ENSMUSG00000082520	2	18260206	18260616
Gm13354	ENSMUSG00000082742	2	18415996	18416164
Gm13353	ENSMUSG00000081181	2	18489753	18489825
Gm13355	ENSMUSG00000082943	2	18563413	18563729
Gm13352	ENSMUSG00000086882	2	18570712	18570973
Gm20539	ENSMUSG00000092353	2	18664342	18682489
Gm13333	ENSMUSG00000081139	2	18680611	18681391
AL929011.1	ENSMUSG00000076950	2	16881536	16881645
AL928557.1	ENSMUSG00000092814	2	18051079	18051204
U6	ENSMUSG00000064964	2	18080314	18080418
Odf2	ENSMUSG00000026790	2	29744741	29787266
Gle1	ENSMUSG00000019715	2	29790946	29815891
Spna2	ENSMUSG00000057738	2	29821080	29886971
Wdr34	ENSMUSG00000039715	2	29887066	29904401
Set	ENSMUSG00000054766	2	29912898	29928097
Pkn3	ENSMUSG00000026785	2	29933204	29946542
Zdhhc12	ENSMUSG00000015335	2	29946464	29949168
Zer1	ENSMUSG00000039686	2	29952803	29980105
Tbc1d13	ENSMUSG00000039678	2	29989266	30007533
Endog	ENSMUSG00000015337	2	30027013	30029589
D2Wsu81e	ENSMUSG00000039660	2	30028967	30033979
Ccbl1	ENSMUSG00000039648	2	30040644	30061367
Lrrc8a	ENSMUSG00000007476	2	30093235	30137668
Phyhd1	ENSMUSG00000079484	2	30121723	30156600
Dolk	ENSMUSG00000075419	2	30139749	30141874
Nup188	ENSMUSG00000052533	2	30141917	30199786
Sh3glb2	ENSMUSG00000026860	2	30200329	30214857
Fam73b	ENSMUSG00000026858	2	30219753	30241041
Dolpp1	ENSMUSG00000026856	2	30247774	30256049
Crat	ENSMUSG00000026853	2	30255991	30271333
Ppp2r4	ENSMUSG00000039515	2	30271559	30303326
Ier5l	ENSMUSG00000089762	2	30328168	30329719
Cstad	ENSMUSG00000047363	2	30450560	30464463
1700001O22Rik	ENSMUSG00000044320	2	30650289	30659181
Mettl11a	ENSMUSG00000026857	2	30663346	30678553
Asb6	ENSMUSG00000039483	2	30678617	30685853
Prrx2	ENSMUSG00000039476	2	30690492	30736761
Ptges	ENSMUSG00000050737	2	30744991	30785383
Tor1b	ENSMUSG00000026848	2	30808479	30814535
Tor1a	ENSMUSG00000026849	2	30816147	30823453
BC005624	ENSMUSG00000026851	2	30828353	30837721
Usp20	ENSMUSG00000026854	2	30837799	30879106
Fnbp1	ENSMUSG00000075415	2	30881726	30997528
Gpr107	ENSMUSG00000000194	2	31007836	31075068
Ncs1	ENSMUSG00000062661	2	31101343	31151509
Hmcn2	ENSMUSG00000055632	2	31169935	31316258
Ass1	ENSMUSG00000076441	2	31325727	31376192
Fubp3	ENSMUSG00000026843	2	31428171	31473046
Prdm12	ENSMUSG00000079466	2	31495557	31511315
Exosc2	ENSMUSG00000039356	2	31526235	31536870
Abl1	ENSMUSG00000026842	2	31543896	31659747
Qrfp	ENSMUSG00000043102	2	31661686	31666100
Fibcd1	ENSMUSG00000026841	2	31668810	31701525
Lamc3	ENSMUSG00000026840	2	31742811	31802059
Slc39a1-ps	ENSMUSG00000085401	2	30014915	30015886
1700084E18Rik	ENSMUSG00000052222	2	30093013	30093743
Gm14471	ENSMUSG00000084892	2	30161587	30179506
Gm16323	ENSMUSG00000087435	2	30269236	30270858
Gm14487	ENSMUSG00000085275	2	30390249	30394542
9330198N18Rik	ENSMUSG00000086405	2	30485175	30544730
Gm14486	ENSMUSG00000087268	2	30513988	30533531
Gm14488	ENSMUSG00000075416	2	30568667	30575577
4930527E20Rik	ENSMUSG00000085491	2	30659313	30662949
Gm13400	ENSMUSG00000084143	2	30779498	30779877
D330023K18Rik	ENSMUSG00000087269	2	31001977	31007811
Gm13405	ENSMUSG00000087430	2	31064990	31066867
Gm13426	ENSMUSG00000084226	2	31407421	31408215
Gm13425	ENSMUSG00000085224	2	31493690	31496109
Gm13424	ENSMUSG00000083143	2	31515990	31516947
Gm13427	ENSMUSG00000087549	2	31531884	31543989
Abl1	ENSMUSG00000090901	2	31657561	31658052
Gm13441	ENSMUSG00000086356	2	31742454	31747937
AL954388.2	ENSMUSG00000093001	2	30162361	30162673
Mir3089	ENSMUSG00000093091	2	30576730	30576813
AL954388.1	ENSMUSG00000078010	2	30208963	30209047
AL732564.1	ENSMUSG00000093188	2	31481225	31481476
U6	ENSMUSG00000088348	2	29786947	29787043
SNORA76	ENSMUSG00000088891	2	31045211	31045334
Gm13464	ENSMUSG00000080994	2	43373986	43374918
A430092G05Rik	ENSMUSG00000085089	2	43914758	43920844
Gm13477	ENSMUSG00000083849	2	44643785	44646471
Gm13476	ENSMUSG00000052248	2	44966658	44969607
Gm13475	ENSMUSG00000081830	2	45184752	45184985
Gm13479	ENSMUSG00000085591	2	45212785	45259555
Zeb2	ENSMUSG00000026872	2	44839154	44972915
Gtdc1	ENSMUSG00000036890	2	44419932	44783177
Arhgap15	ENSMUSG00000049744	2	43604344	44251473
Kynu	ENSMUSG00000026866	2	43410849	43538235
Mir5129	ENSMUSG00000092679	2	44878620	44878697
U6	ENSMUSG00000088124	2	44284455	44284563
Galnt5	ENSMUSG00000026828	2	57850295	57898271
Ermn	ENSMUSG00000026830	2	57897524	57905275
Cytip	ENSMUSG00000026832	2	57981548	58047943
Acvr1c	ENSMUSG00000026834	2	58119864	58210306
Acvr1	ENSMUSG00000026836	2	58241055	58419568
Gm17409	ENSMUSG00000091922	2	58322527	58323488
Upp2	ENSMUSG00000026839	2	58419709	58645382
Ccdc148	ENSMUSG00000036641	2	58674108	58998740
Gm11099	ENSMUSG00000079353	2	58759370	58760029
Pkp4	ENSMUSG00000026991	2	58998907	59193265
Dapl1	ENSMUSG00000026989	2	59322710	59343077
Tanc1	ENSMUSG00000035168	2	59450099	59684206
Gm13534	ENSMUSG00000053472	2	57960448	57962961
Gm13546	ENSMUSG00000086862	2	58016412	58029474
Gm13544	ENSMUSG00000086995	2	58129190	58139313
Gm13545	ENSMUSG00000082408	2	58190758	58191239
Gm13558	ENSMUSG00000086129	2	58558180	58587807
Gm13559	ENSMUSG00000080985	2	58593050	58593912
Gm13560	ENSMUSG00000082800	2	58746451	58746779
Gm13557	ENSMUSG00000082989	2	58811086	58812118
Gm13550	ENSMUSG00000084250	2	58986156	58986680
5330411J11Rik	ENSMUSG00000087455	2	59220559	59225528
Gm13551	ENSMUSG00000083276	2	59234545	59234974
Gm13549	ENSMUSG00000080982	2	59237043	59237838
Gm13552	ENSMUSG00000081157	2	59402325	59402741
Baz2b	ENSMUSG00000026987	2	59737420	60047896
March7	ENSMUSG00000026977	2	60047944	60088733
Cd302	ENSMUSG00000060703	2	60090050	60122545
Ly75	ENSMUSG00000026980	2	60130160	60221360
Pla2r1	ENSMUSG00000054580	2	60255600	60391365
Itgb6	ENSMUSG00000026971	2	60436349	60560700
Rbms1	ENSMUSG00000026970	2	60588250	60801261
Tank	ENSMUSG00000064289	2	61416642	61492228
Psmd14	ENSMUSG00000026914	2	61549751	61638433
Psmd14	ENSMUSG00000090649	2	61549751	61558658
Tbr1	ENSMUSG00000035033	2	61640987	61652171
Gm13574	ENSMUSG00000081236	2	59830008	59830401
Gm13572	ENSMUSG00000085975	2	59875198	59876894
Gm13570	ENSMUSG00000087181	2	59936439	59936771
Gm13620	ENSMUSG00000086603	2	59963153	59963876
Ldha-ps	ENSMUSG00000082330	2	59972112	59973106
Gm13573	ENSMUSG00000080198	2	60113001	60113631
Gm13571	ENSMUSG00000086196	2	60176245	60209291
Gm13580	ENSMUSG00000087283	2	60249582	60250636
Gm13583	ENSMUSG00000086578	2	60388814	60391980
Gm13566	ENSMUSG00000084115	2	60415594	60416735
Gm13567	ENSMUSG00000083195	2	60434105	60434351
Gm13582	ENSMUSG00000075325	2	60802433	60813208
Gm13579	ENSMUSG00000083334	2	60868408	60869027
Gm13581	ENSMUSG00000083197	2	61062849	61063139
Gm13626	ENSMUSG00000081954	2	61544950	61545648
5S_rRNA	ENSMUSG00000087794	2	61636237	61636353
AL928581.1	ENSMUSG00000080547	2	60792117	60792190
SNORA17	ENSMUSG00000077464	2	61118335	61118466
AL845291.1	ENSMUSG00000092660	2	61600443	61600526
SNORA75	ENSMUSG00000088340	2	61330823	61330951
Slc4a10	ENSMUSG00000026904	2	61884519	62164787
Dpp4	ENSMUSG00000035000	2	62168130	62250288
Gm13555	ENSMUSG00000083018	2	61808411	61808729
Gm13561	ENSMUSG00000087518	2	62195128	62308970
Gm13565	ENSMUSG00000087681	2	62274937	62279199
Gm13564	ENSMUSG00000087422	2	62290993	62294705
Gcg	ENSMUSG00000000394	2	62312587	62321707
Fap	ENSMUSG00000000392	2	62339000	62412132
Fign	ENSMUSG00000075324	2	63809564	63936095
Grb14	ENSMUSG00000026888	2	64750533	64863044
Cobll1	ENSMUSG00000034903	2	64926396	65077460
Gm13575	ENSMUSG00000087702	2	64220659	64231917
Gm13577	ENSMUSG00000082127	2	64312802	64313014
Gm13576	ENSMUSG00000081065	2	64407920	64408697
Gm13578	ENSMUSG00000084104	2	64706056	64706645
U6	ENSMUSG00000065837	2	63270145	63270251
Slc38a11	ENSMUSG00000061171	2	65154487	65202091
Gm13594	ENSMUSG00000086881	2	65076813	65077732
Gm13592	ENSMUSG00000083707	2	65115474	65116483
Gm13593	ENSMUSG00000080766	2	65134235	65135426
Scn3a	ENSMUSG00000057182	2	65295175	65405684
Gm13595	ENSMUSG00000086701	2	65347322	65350662
SNORA17	ENSMUSG00000088197	2	65214226	65214339
Scn2a1	ENSMUSG00000075318	2	65458914	65605504
Csrnp3	ENSMUSG00000044647	2	65683824	65869603
Gm13619	ENSMUSG00000052865	2	65690465	65698676
Gm13617	ENSMUSG00000085160	2	65782356	65792127
Galnt3	ENSMUSG00000026994	2	65920823	65963051
SNORD26	ENSMUSG00000088306	2	65966189	65966268
Gm13616	ENSMUSG00000080728	2	65983711	65983932
Ttc21b	ENSMUSG00000034848	2	66022384	66094674
Gm13618	ENSMUSG00000086671	2	66025893	66030870
Scn1a	ENSMUSG00000064329	2	66108838	66278897
Gm13630	ENSMUSG00000085386	2	66247551	66259645
Gm13629	ENSMUSG00000087301	2	66278937	66384083
Rpl35-ps1	ENSMUSG00000080855	2	66285093	66285464
Scn9a	ENSMUSG00000075316	2	66318137	66473009
Gm13627	ENSMUSG00000081307	2	66367471	66368803
7SK	ENSMUSG00000088994	2	66440572	66440855
Scn7a	ENSMUSG00000034810	2	66511482	66622971
Xirp2	ENSMUSG00000027022	2	67284059	67364671
F830016D02Rik	ENSMUSG00000067582	2	67269281	67271973
Gm13600	ENSMUSG00000081973	2	66701319	66702832
Gm13602	ENSMUSG00000082218	2	66780615	66781107
Gm13598	ENSMUSG00000086908	2	66995703	67032792
Gm1322	ENSMUSG00000075314	2	67011891	67023007
Gm13599	ENSMUSG00000087043	2	67147716	67234548
Gm13601	ENSMUSG00000087467	2	67329101	67354582
Gm13604	ENSMUSG00000083910	2	67545347	67545828
SNORA17	ENSMUSG00000088043	2	67258088	67258219
Hat1	ENSMUSG00000027018	2	71227015	71279679
Metap1d	ENSMUSG00000041921	2	71291333	71363251
Dlx1	ENSMUSG00000041911	2	71366170	71372038
Dlx2	ENSMUSG00000023391	2	71381466	71384811
Gm1631	ENSMUSG00000064263	2	71557474	71569023
Itga6	ENSMUSG00000027111	2	71583673	71696473
Pdk1	ENSMUSG00000006494	2	71711281	71741915
Rapgef4	ENSMUSG00000049044	2	71819272	72095531
B230120H23Rik	ENSMUSG00000004085	2	72123694	72280667
Cdca7	ENSMUSG00000055612	2	72314216	72324950
Sp3	ENSMUSG00000027109	2	72774484	72818503
Gm11084	ENSMUSG00000079286	2	72809605	72824773
Ola1	ENSMUSG00000027108	2	72930858	73056981
Sp9	ENSMUSG00000068859	2	73109982	73122763
Cir1	ENSMUSG00000041777	2	73121162	73150758
Scrn3	ENSMUSG00000008226	2	73150658	73175875
Gpr155	ENSMUSG00000041762	2	73179563	73224629
Gm17250	ENSMUSG00000090953	2	71586132	71588219
Gm13642	ENSMUSG00000086846	2	71250588	71250974
Dlx1as	ENSMUSG00000084946	2	71354511	71375948
Gm13647	ENSMUSG00000087570	2	71575872	71583454
Gm13663	ENSMUSG00000086641	2	71585564	71588257
Gm13662	ENSMUSG00000084794	2	71587982	71597858
Gm13739	ENSMUSG00000081878	2	71600295	71600824
Gm13746	ENSMUSG00000087345	2	71794110	71795425
Gm13634	ENSMUSG00000085439	2	71935660	71986853
BB114351	ENSMUSG00000085001	2	72062745	72070359
4732447D17Rik	ENSMUSG00000086231	2	72083022	72087032
Gm13635	ENSMUSG00000084261	2	72198304	72198599
Gm13636	ENSMUSG00000081538	2	72383269	72383669
Gm13637	ENSMUSG00000080865	2	72408538	72408879
Gm13638	ENSMUSG00000083279	2	72470327	72471483
Ak3l2-ps	ENSMUSG00000081957	2	72471993	72472664
8430437L04Rik	ENSMUSG00000085252	2	72541567	72567525
6430710C18Rik	ENSMUSG00000085427	2	72583903	72651774
Hspe1-ps5	ENSMUSG00000084213	2	72793955	72794251
1700011J10Rik	ENSMUSG00000063714	2	72817481	72826734
Gm13665	ENSMUSG00000082455	2	72954796	72955332
Gm13666	ENSMUSG00000083569	2	72969802	72970600
Gm13664	ENSMUSG00000083976	2	73014668	73015012
Gm13703	ENSMUSG00000085519	2	73195325	73202390
Gm13709	ENSMUSG00000086546	2	73208966	73217354
D230022J07Rik	ENSMUSG00000087176	2	73225027	73258555
U6	ENSMUSG00000087789	2	71288571	71288671
SNORA17	ENSMUSG00000088297	2	71837723	71837849
U6	ENSMUSG00000088066	2	71333328	71333431
Mir5115	ENSMUSG00000092984	2	72850911	72850984
7SK	ENSMUSG00000088302	2	72165744	72166051
AL844840.1	ENSMUSG00000092851	2	72788920	72789044
Wipf1	ENSMUSG00000075284	2	73267667	73367791
Chrna1	ENSMUSG00000027107	2	73401272	73418395
Chn1	ENSMUSG00000056486	2	73448717	73613403
Atf2	ENSMUSG00000027104	2	73654566	73730696
Atp5g3	ENSMUSG00000018770	2	73746504	73749383
Gm10822	ENSMUSG00000075281	2	73731053	73738907
Gm13707	ENSMUSG00000085768	2	73259966	73267199
Gm13708	ENSMUSG00000086069	2	73297762	73315659
Gm13705	ENSMUSG00000086382	2	73422907	73427265
Gm13704	ENSMUSG00000086544	2	73434583	73454069
Gm13706	ENSMUSG00000085838	2	73496327	73498320
Gm13640	ENSMUSG00000081062	2	73647219	73647482
Gm13668	ENSMUSG00000083072	2	73797726	73798721
A630050E04Rik	ENSMUSG00000085387	2	73938981	73940399
Gm13667	ENSMUSG00000084791	2	73973814	73988891
4930441J16Rik	ENSMUSG00000085405	2	74136997	74145774
AL928889.1	ENSMUSG00000092951	2	73459484	73459771
Lnp	ENSMUSG00000009207	2	74358348	74417492
Evx2	ENSMUSG00000001815	2	74491049	74497918
Hoxd13	ENSMUSG00000001819	2	74506367	74509656
Hoxd12	ENSMUSG00000001823	2	74512986	74515763
Hoxd11	ENSMUSG00000042499	2	74517449	74525798
Hoxd10	ENSMUSG00000050368	2	74529147	74533163
Gm14396	ENSMUSG00000086077	2	74533577	74535432
Hoxd9	ENSMUSG00000043342	2	74535737	74538265
Hoxd8	ENSMUSG00000027102	2	74542672	74545990
4930445N08Rik	ENSMUSG00000087205	2	74417133	74422601
Mrpl23-ps1	ENSMUSG00000075279	2	74429387	74429974
Gm13672	ENSMUSG00000082973	2	74469897	74470355
Gm20440	ENSMUSG00000092315	2	74521503	74532251
1700109F18Rik	ENSMUSG00000052371	2	74541305	74554187
6720416L17Rik	ENSMUSG00000075277	2	74586479	74600953
Gm14424	ENSMUSG00000085015	2	74590741	74591801
Gm14426	ENSMUSG00000086559	2	74592512	74593154
Gm14425	ENSMUSG00000081156	2	74693763	74694368
Gm14427	ENSMUSG00000083837	2	74724429	74725063
Gm13652	ENSMUSG00000087333	2	74962928	74975855
Hoxd3	ENSMUSG00000079277	2	74549986	74586331
Hoxd4	ENSMUSG00000042464	2	74560035	74567217
Hoxd1	ENSMUSG00000042448	2	74601037	74603200
Mtx2	ENSMUSG00000027099	2	74663860	74716488
n-R5s198	ENSMUSG00000084574	2	74773472	74773571
Mir10b	ENSMUSG00000065500	2	74564127	74564194
U6	ENSMUSG00000065237	2	74462699	74462805
A330043C09Rik	ENSMUSG00000086044	2	74985175	75015715
Gm13654	ENSMUSG00000081406	2	75029091	75029887
Gm13653	ENSMUSG00000075276	2	75030334	75030849
Gm13659	ENSMUSG00000086200	2	75149137	75151238
Gm13658	ENSMUSG00000087504	2	75274114	75282236
Gm13660	ENSMUSG00000086576	2	75297023	75302845
Gm13655	ENSMUSG00000082152	2	75470695	75471439
Hnrnpa3	ENSMUSG00000059005	2	75497318	75507464
AL772404.1	ENSMUSG00000093242	2	75497301	75497374
Nfe2l2	ENSMUSG00000015839	2	75513570	75542698
Agps	ENSMUSG00000042410	2	75670234	75769407
E030042O20Rik	ENSMUSG00000087222	2	75542827	75548081
Gm13656	ENSMUSG00000087527	2	75567649	75568229
Gm13657	ENSMUSG00000086813	2	75615245	75620363
Gm13669	ENSMUSG00000081833	2	75646415	75646871
Gm13670	ENSMUSG00000082187	2	75660085	75660850
U6	ENSMUSG00000089015	2	75524797	75524895
Ttc30b	ENSMUSG00000075273	2	75773920	75776519
Ttc30a2	ENSMUSG00000075272	2	75814129	75816257
Ttc30a1	ENSMUSG00000075271	2	75817163	75820024
Pde11a	ENSMUSG00000075270	2	75827198	76176831
Cyct	ENSMUSG00000056436	2	76191999	76198507
Rbm45	ENSMUSG00000042369	2	76208041	76221825
Olfr1255	ENSMUSG00000045148	2	89656485	89657434
Olfr1256	ENSMUSG00000075073	2	89675180	89681290
Olfr48	ENSMUSG00000075072	2	89684223	89685128
Olfr1257	ENSMUSG00000049057	2	89718601	89721966
Olfr1258	ENSMUSG00000049149	2	89767476	89771002
Olfr1259	ENSMUSG00000068806	2	89783341	89784270
Olfr1260	ENSMUSG00000042894	2	89814866	89818869
Olfr1261	ENSMUSG00000061295	2	89831395	89834552
Olfr1262	ENSMUSG00000051313	2	89840302	89843527
Olfr1263	ENSMUSG00000059112	2	89855048	89856076
Olfr1264	ENSMUSG00000075069	2	89861295	89862221
Olfr1265	ENSMUSG00000059910	2	89877078	89878100
Olfr140	ENSMUSG00000075068	2	89891571	89903751
Olfr1269	ENSMUSG00000075067	2	89958757	89959774
Olfr32	ENSMUSG00000075066	2	89978345	89979352
Gm4222	ENSMUSG00000091703	2	89988617	89989045
Olfr1270	ENSMUSG00000075065	2	89989176	89990193
Olfr1506	ENSMUSG00000075064	2	90061724	90064628
Olfr142	ENSMUSG00000075063	2	90092226	90093143
Olfr1271	ENSMUSG00000075062	2	90105517	90106585
Olfr1272	ENSMUSG00000075061	2	90121804	90122730
Gm13769	ENSMUSG00000089859	2	90162379	90165365
Ptprj	ENSMUSG00000025314	2	90269911	90420804
Nup160	ENSMUSG00000051329	2	90517372	90576485
Fnbp4	ENSMUSG00000008200	2	90585527	90621178
Agbl2	ENSMUSG00000040812	2	90622884	90674594
Mtch2	ENSMUSG00000027282	2	90687312	90706967
C1qtnf4	ENSMUSG00000040794	2	90725943	90730683
Ndufs3	ENSMUSG00000005510	2	90734791	90744984
Kbtbd4	ENSMUSG00000005505	2	90744897	90751783
Ptpmt1	ENSMUSG00000063235	2	90750870	90758415
Celf1	ENSMUSG00000005506	2	90780539	90859654
Rapsn	ENSMUSG00000002104	2	90875777	90885886
Psmc3	ENSMUSG00000002102	2	90894166	90906526
Slc39a13	ENSMUSG00000002105	2	90901948	90910574
Sfpi1	ENSMUSG00000002111	2	90922547	90955913
Mybpc3	ENSMUSG00000002100	2	90958301	90976673
Madd	ENSMUSG00000040687	2	90977517	91023994
Nr1h3	ENSMUSG00000002108	2	91024218	91042991
Acp2	ENSMUSG00000002103	2	91043042	91054255
Ddb2	ENSMUSG00000002109	2	91051729	91077139
Pacsin3	ENSMUSG00000027257	2	91096111	91104836
Arfgap2	ENSMUSG00000027255	2	91105131	91117088
1110051M20Rik	ENSMUSG00000040591	2	91115225	91284861
Lrp4	ENSMUSG00000027253	2	91297668	91354058
Ckap5	ENSMUSG00000040549	2	91366919	91460821
F2	ENSMUSG00000027249	2	91465477	91476571
Zfp408	ENSMUSG00000075040	2	91483826	91489948
Arhgap1	ENSMUSG00000027247	2	91490017	91512483
Atg13	ENSMUSG00000027244	2	91514775	91550733
Harbi1	ENSMUSG00000027243	2	91551009	91561702
Ambra1	ENSMUSG00000040506	2	91570291	91759006
A330069E16Rik	ENSMUSG00000073749	2	91077303	91078509
Gm17281	ENSMUSG00000091637	2	91090900	91096152
Olfr1267-ps1	ENSMUSG00000084336	2	89925687	89926616
Olfr1268-ps1	ENSMUSG00000082574	2	89950625	89951548
Gm13768	ENSMUSG00000080223	2	90014254	90035309
RP24-113P16.1	ENSMUSG00000093625	2	90079640	90081580
Olfr1273-ps	ENSMUSG00000080809	2	90136092	90137016
Gm13767	ENSMUSG00000085547	2	90198335	90223320
Olfr1274-ps	ENSMUSG00000082980	2	90240797	90241831
4933423P22Rik	ENSMUSG00000085471	2	90319393	90328582
Rpl30-ps3	ENSMUSG00000080873	2	90587728	90588161
Gm13772	ENSMUSG00000080977	2	90644417	90644733
Gm17661	ENSMUSG00000091037	2	90757800	90758071
Gm13777	ENSMUSG00000082108	2	90870935	90871279
Gm13778	ENSMUSG00000086495	2	90884249	90894090
Gm13783	ENSMUSG00000086206	2	91036063	91042935
Gm13787	ENSMUSG00000081248	2	91184179	91184346
Gm13770	ENSMUSG00000081834	2	91363737	91364041
Gm13771	ENSMUSG00000083832	2	91481842	91482079
Gm13776	ENSMUSG00000082457	2	91556316	91557576
U6	ENSMUSG00000088018	2	91040319	91040424
Snord67	ENSMUSG00000077221	2	91436227	91436337
Shc4	ENSMUSG00000035109	2	125453183	125549884
Eid1	ENSMUSG00000091337	2	125498831	125500521
Secisbp2l	ENSMUSG00000035093	2	125562722	125608606
Cops2	ENSMUSG00000027206	2	125656040	125684875
Galk2	ENSMUSG00000027207	2	125684845	125810035
4930525F21Rik	ENSMUSG00000027209	2	125809219	125977740
Fgf7	ENSMUSG00000027208	2	125860394	125916921
Dtwd1	ENSMUSG00000023330	2	125977877	125991015
Atp8b4	ENSMUSG00000060131	2	126146709	126326410
Sema6d	ENSMUSG00000027200	2	123915705	124493506
Gm17555	ENSMUSG00000090353	2	124657023	124658522
Slc24a5	ENSMUSG00000035183	2	124893860	124914413
Myef2	ENSMUSG00000027201	2	124910364	124949397
Ctxn2	ENSMUSG00000074872	2	124962428	124973575
Slc12a1	ENSMUSG00000027202	2	124978241	125055738
Gm9913	ENSMUSG00000053615	2	125330825	125333617
Cep152	ENSMUSG00000068394	2	125388824	125450849
Gm13994	ENSMUSG00000087450	2	124534391	124536819
Gm14004	ENSMUSG00000087056	2	124950092	124960063
Gm14002	ENSMUSG00000086416	2	125033265	125043248
A530010F05Rik	ENSMUSG00000085797	2	125100300	125102908
Gm14003	ENSMUSG00000087682	2	125108424	125109714
Eid1	ENSMUSG00000078135	2	125498863	125499837
Fbn1	ENSMUSG00000027204	2	125126330	125333729
Dut	ENSMUSG00000027203	2	125072926	125084344
U6	ENSMUSG00000065084	2	125935644	125935750
7SK	ENSMUSG00000089480	2	126094808	126095099
U6	ENSMUSG00000065851	2	124930745	124930851
Gm16762	ENSMUSG00000085076	2	126346938	126379398
Slc27a2	ENSMUSG00000027359	2	126378143	126413979
Hdc	ENSMUSG00000027360	2	126419403	126445035
Gabpb1	ENSMUSG00000027361	2	126453178	126502073
U1	ENSMUSG00000088200	2	126460275	126460423
Usp8	ENSMUSG00000027363	2	126533064	126585033
Usp50	ENSMUSG00000027364	2	126534832	126609196
Gm10774	ENSMUSG00000074846	2	126535090	126535293
Trpm7	ENSMUSG00000027365	2	126617301	126701966
Gm14212	ENSMUSG00000081894	2	126690239	126691064
2010106G01Rik	ENSMUSG00000027366	2	126716127	126758971
Ap4e1	ENSMUSG00000001998	2	126834453	126893645
AL928590.1	ENSMUSG00000092918	2	126866297	126866421
Blvra	ENSMUSG00000001999	2	126896401	126922820
Ncaph	ENSMUSG00000034906	2	126929545	126959690
Itpripl1	ENSMUSG00000074825	2	126964508	126969178
1810024B03Rik	ENSMUSG00000044145	2	127012091	127034016
Gm10766	ENSMUSG00000074822	2	127095445	127095768
Stard7	ENSMUSG00000027367	2	127095954	127124670
Tmem127	ENSMUSG00000034850	2	127073644	127086843
Snrnp200	ENSMUSG00000003660	2	127034122	127066187
Ciao1	ENSMUSG00000003662	2	127066674	127073552
Dusp2	ENSMUSG00000027368	2	127161895	127164112
Astl	ENSMUSG00000050468	2	127164375	127183387
Adra2b	ENSMUSG00000058620	2	127188944	127192957
Gpat2	ENSMUSG00000046338	2	127250935	127261828
Fahd2a	ENSMUSG00000027371	2	127261951	127270301
Kcnip3	ENSMUSG00000079056	2	127282234	127347830
7SK	ENSMUSG00000084628	2	127298753	127299044
Gm17601	ENSMUSG00000090815	2	127343028	127343545
Prom2	ENSMUSG00000027376	2	127352209	127367203
Gm14229	ENSMUSG00000083648	2	127394313	127395162
Zfp661	ENSMUSG00000034800	2	127400398	127412830
Mrps5	ENSMUSG00000027374	2	127412958	127432565
Mal	ENSMUSG00000027375	2	127458962	127482431
Gm14245	ENSMUSG00000084006	2	127514141	127515983
Gm14244	ENSMUSG00000087162	2	127517635	127526224
Mall	ENSMUSG00000027377	2	127530122	127555668
SNORA55	ENSMUSG00000089264	2	127503406	127503463
Nphp1	ENSMUSG00000027378	2	127566468	127614633
Bub1	ENSMUSG00000027379	2	127626858	127657601
1500011K16Rik	ENSMUSG00000051319	2	127617124	127618224
Acoxl	ENSMUSG00000027380	2	127664612	127949609
AL844481.1	ENSMUSG00000093203	2	127717724	127717849
Bcl2l11	ENSMUSG00000027381	2	127951774	127988283
U1	ENSMUSG00000088175	2	127915660	127915796
Gm14009	ENSMUSG00000085750	2	128015723	128030370
Gm14005	ENSMUSG00000074813	2	128021729	128255085
Gm14012	ENSMUSG00000086879	2	128063429	128065379
Gm14010	ENSMUSG00000079053	2	128249390	128250301
Gm14006	ENSMUSG00000082671	2	128382990	128383942
Gm14008	ENSMUSG00000082350	2	128413631	128413904
Gm355	ENSMUSG00000074812	2	128416945	128424200
Gm14007	ENSMUSG00000080789	2	128432721	128432930
Anapc1	ENSMUSG00000014355	2	128435840	128513127
Mertk	ENSMUSG00000014361	2	128524692	128628630
Gm14011	ENSMUSG00000085036	2	128577007	128579441
SNORA25	ENSMUSG00000087785	2	128606112	128606235
Tmem87b	ENSMUSG00000014353	2	128643854	128679997
Fbln7	ENSMUSG00000027386	2	128688717	128722770
Zc3h8	ENSMUSG00000027387	2	128752004	128769813
AL833780.1	ENSMUSG00000092719	2	128751307	128751428
Gm10762	ENSMUSG00000074807	2	128792329	128793461
Zc3h6	ENSMUSG00000042851	2	128793138	128844299
Gm14028	ENSMUSG00000082339	2	128778708	128779186
4933427J07Rik	ENSMUSG00000087267	2	128781407	128783597
Gm14027	ENSMUSG00000090248	2	128842688	128847492
Gm14025	ENSMUSG00000079051	2	128863881	128873908
Ttl	ENSMUSG00000027394	2	128891678	128922019
Gm14022	ENSMUSG00000087151	2	128886682	128891422
Polr1b	ENSMUSG00000027395	2	128926731	128952330
Chchd5	ENSMUSG00000037938	2	128955436	128959870
AI847159	ENSMUSG00000084826	2	128984402	129006403
Gm14026	ENSMUSG00000082274	2	128994436	128996224
Gm14029	ENSMUSG00000086652	2	129008218	129009683
Slc20a1	ENSMUSG00000027397	2	129024500	129037352
9830144P21Rik	ENSMUSG00000087528	2	129031694	129056315
A730036I17Rik	ENSMUSG00000056738	2	129044705	129061340
Gm14024	ENSMUSG00000085485	2	129072112	129094262
Ckap2l	ENSMUSG00000048327	2	129093946	129122948
Gm14023	ENSMUSG00000085498	2	129123106	129133562
Il1a	ENSMUSG00000027399	2	129125346	129135708
U12	ENSMUSG00000065057	2	129141065	129141215
Gm14039	ENSMUSG00000082097	2	129188495	129188595
Il1b	ENSMUSG00000027398	2	129190306	129196875
Gm14047	ENSMUSG00000074805	2	129195633	129201484
Gm14045	ENSMUSG00000081888	2	129204007	129205132
F830045P16Rik	ENSMUSG00000043727	2	129284095	129362338
Gm14040	ENSMUSG00000086637	2	129319306	129341543
Gm14041	ENSMUSG00000087015	2	129390783	129391804
Sirpa	ENSMUSG00000037902	2	129418571	129457964
Pdyn	ENSMUSG00000027400	2	129512301	129525580
Gm14046	ENSMUSG00000084328	2	129575637	129576145
Gm14043	ENSMUSG00000083589	2	129599432	129599659
Stk35	ENSMUSG00000037885	2	129626253	129658023
Tgm3	ENSMUSG00000027401	2	129838085	129876135
SNORA17	ENSMUSG00000089152	2	129897460	129897546
SNORA17	ENSMUSG00000077348	2	129911777	129911905
AU015228	ENSMUSG00000074804	2	129926130	129929111
Tgm6	ENSMUSG00000027403	2	129938152	129979968
Snrpb	ENSMUSG00000027404	2	129997150	130005139
Tmc2	ENSMUSG00000060332	2	130020930	130090181
Nop56	ENSMUSG00000027405	2	130100166	130105049
Idh3b	ENSMUSG00000027406	2	130105045	130110283
Snord57	ENSMUSG00000065272	2	130103752	130103823
AL833804.1	ENSMUSG00000093645	2	130102931	130103016
Snord110	ENSMUSG00000080610	2	130101242	130101309
SNORA51	ENSMUSG00000065287	2	130101973	130102105
SNORD56	ENSMUSG00000065289	2	130103433	130103502
Ebf4	ENSMUSG00000053552	2	130120905	130196217
Ptpra	ENSMUSG00000027303	2	130276014	130380036
Fam113a	ENSMUSG00000037773	2	130242983	130250437
4933425O20Rik	ENSMUSG00000049692	2	130232214	130233635
Mrps26	ENSMUSG00000037740	2	130389478	130394431
Oxt	ENSMUSG00000027301	2	130401909	130402790
Avp	ENSMUSG00000037727	2	130406356	130408290
Ubox5	ENSMUSG00000027300	2	130415738	130455774
Fastkd5	ENSMUSG00000079043	2	130439576	130455763
Prosapip1	ENSMUSG00000037703	2	130458575	130468539
Ddrgk1	ENSMUSG00000068290	2	130479696	130490395
Itpa	ENSMUSG00000074797	2	130493346	130507350
Slc4a11	ENSMUSG00000074796	2	130509849	130523255
Vps16	ENSMUSG00000027411	2	130250075	130270005
4930402H24Rik	ENSMUSG00000027309	2	130531936	130732142
Gm14044	ENSMUSG00000083483	2	130210581	130211086
Gm14042	ENSMUSG00000082985	2	130226173	130227005
4930473A02Rik	ENSMUSG00000060029	2	130369527	130389485
Gm14057	ENSMUSG00000089662	2	130629237	130629718
1700020A23Rik	ENSMUSG00000027409	2	130230995	130231810
Cpxm1	ENSMUSG00000027408	2	130216511	130223310
AL731707.1	ENSMUSG00000077004	2	130357414	130357480
7SK	ENSMUSG00000084694	2	130531064	130531432
Rassf2	ENSMUSG00000027339	2	131815151	131855994
Prnd	ENSMUSG00000027338	2	131735693	131781866
Atrn	ENSMUSG00000027312	2	130732231	130856069
Adra1d	ENSMUSG00000027335	2	131371586	131388021
4930425F17Rik	ENSMUSG00000062501	2	131473561	131474330
Erv3	ENSMUSG00000037482	2	131679414	131685483
Prnp	ENSMUSG00000079037	2	131735664	131764165
Gfra4	ENSMUSG00000027316	2	130865368	130868824
Adam33	ENSMUSG00000027318	2	130876327	130889550
A730017L22Rik	ENSMUSG00000085566	2	130698795	130732132
Gm14048	ENSMUSG00000080989	2	130706602	130707869
Gm14049	ENSMUSG00000083953	2	130813720	130814355
Gm14232	ENSMUSG00000087405	2	130985273	130997078
Gm14233	ENSMUSG00000086329	2	131124281	131125571
Gm14284	ENSMUSG00000082044	2	131147824	131148102
Gm14283	ENSMUSG00000081652	2	131240657	131240981
Gm14304	ENSMUSG00000083671	2	131279864	131280376
Gm14285	ENSMUSG00000087524	2	131387350	131388915
Gm14280	ENSMUSG00000086831	2	131478633	131547574
5330413P13Rik	ENSMUSG00000086822	2	131645742	131673396
Gm14282	ENSMUSG00000081422	2	131671092	131671331
Gm14281	ENSMUSG00000083469	2	131672131	131673424
Lamr1-ps1	ENSMUSG00000081229	2	131729822	131730695
Gm14052	ENSMUSG00000082990	2	131925605	131926635
Gm14051	ENSMUSG00000086756	2	131970269	132045986
Slc23a2	ENSMUSG00000027340	2	131878232	131970844
Siglec1	ENSMUSG00000027322	2	130894956	130912501
Hspa12b	ENSMUSG00000074793	2	130953016	130972057
Gm11037	ENSMUSG00000079039	2	130959233	130959951
1700037H04Rik	ENSMUSG00000027327	2	130972060	130985817
Spef1	ENSMUSG00000027329	2	130995997	131013018
Cenpb	ENSMUSG00000068267	2	131000918	131005803
Cdc25b	ENSMUSG00000027330	2	131012685	131024233
2310035K24Rik	ENSMUSG00000068264	2	131032814	131039250
Mavs	ENSMUSG00000037523	2	131059799	131073761
Pank2	ENSMUSG00000037514	2	131088231	131124924
Rnf24	ENSMUSG00000048911	2	131123800	131178628
Smox	ENSMUSG00000027333	2	131317232	131351658
RNaseP_nuc	ENSMUSG00000089113	2	131239397	131239698
AL831731.1	ENSMUSG00000092654	2	131393747	131393818
Mir103-2	ENSMUSG00000065563	2	131113788	131113873
5730494N06Rik	ENSMUSG00000027341	2	132065228	132073543
Pcna	ENSMUSG00000027342	2	132074898	132079050
AV099323	ENSMUSG00000087377	2	132079093	132087069
Prokr2	ENSMUSG00000050558	2	132163469	132211183
Cds2	ENSMUSG00000058793	2	132088884	132137786
4921508D12Rik	ENSMUSG00000027345	2	132250477	132278235
Gm14095	ENSMUSG00000086250	2	132308948	132326884
1700026D11Rik	ENSMUSG00000086379	2	132316370	132349793
Gpcpd1	ENSMUSG00000027346	2	132354818	132413465
AU019990	ENSMUSG00000074783	2	132423931	132478804
1110034G24Rik	ENSMUSG00000044991	2	132512667	132576791
Rpl23a-ps4	ENSMUSG00000081445	2	132487978	132488432
Gm14099	ENSMUSG00000084089	2	132499121	132499725
Gm14098	ENSMUSG00000081662	2	132504005	132504975
Gm14097	ENSMUSG00000084839	2	132520168	132524259
U6	ENSMUSG00000064413	2	132542842	132542944
Chgb	ENSMUSG00000027350	2	132607014	132620815
Trmt6	ENSMUSG00000037376	2	132629943	132641791
Mcm8	ENSMUSG00000027353	2	132641877	132669933
Gm14104	ENSMUSG00000086575	2	132671735	132672992
Gm14102	ENSMUSG00000086478	2	132784178	132785541
Gm14101	ENSMUSG00000084393	2	132805905	132806904
Gm14103	ENSMUSG00000082940	2	132872923	132873288
Gm14094	ENSMUSG00000083689	2	133025347	133025956
A430048G15Rik	ENSMUSG00000086650	2	133257831	133279098
Crls1	ENSMUSG00000027357	2	132672402	132692521
Lrrn4	ENSMUSG00000043110	2	132694041	132706627
Fermt1	ENSMUSG00000027356	2	132729915	132771772
U1	ENSMUSG00000065050	2	132834223	132834390
Gm14100	ENSMUSG00000087585	2	133288854	133291520
Bmp2	ENSMUSG00000027358	2	133377895	133388621
Mir3090	ENSMUSG00000093338	2	133390444	133390530
Hao1	ENSMUSG00000027261	2	134323097	134380104
Gm14037	ENSMUSG00000081243	2	134556531	134556843
Gm14038	ENSMUSG00000083879	2	134587805	134589385
Gm14036	ENSMUSG00000082399	2	134629685	134630164
4930545L23Rik	ENSMUSG00000085247	2	134995309	135041352
9630028H03Rik	ENSMUSG00000085631	2	135151183	135409320
Tmx4	ENSMUSG00000034723	2	134419921	134469881
Plcb1	ENSMUSG00000051177	2	134611895	135300994
U6	ENSMUSG00000064983	2	133410051	133410157
Plcb4	ENSMUSG00000039943	2	135484747	135840329
Gm14074	ENSMUSG00000084762	2	135474643	135477799
Gm14209	ENSMUSG00000085908	2	135495189	135496161
Gm14211	ENSMUSG00000085709	2	135511910	135518890
Gm14210	ENSMUSG00000086928	2	135637681	135638663
Ankrd5	ENSMUSG00000074771	2	136327646	136387827
Gm11035	ENSMUSG00000079024	2	136270138	136270344
BC034902	ENSMUSG00000017914	2	136327734	136341248
Snap25	ENSMUSG00000027273	2	136539189	136608164
Mkks	ENSMUSG00000027274	2	136699516	136717125
2210009G21Rik	ENSMUSG00000027281	2	136716954	136897686
Jag1	ENSMUSG00000027276	2	136907192	136942380
6330527O06Rik	ENSMUSG00000027270	2	135877975	135895653
Pak7	ENSMUSG00000039913	2	135906840	136213703
Gm14218	ENSMUSG00000085383	2	135962742	135965897
Gm14056	ENSMUSG00000082647	2	136224798	136225439
Gm14054	ENSMUSG00000081310	2	136228455	136229158
Gm14053	ENSMUSG00000082849	2	136569882	136570351
Gm14055	ENSMUSG00000085504	2	137114239	137154862
U6	ENSMUSG00000064444	2	135851887	135851987
Gm14066	ENSMUSG00000085071	2	139082612	139503450
Gm14067	ENSMUSG00000082526	2	138742355	138742668
Gm14069	ENSMUSG00000082285	2	139001633	139001861
Btbd3	ENSMUSG00000062098	2	138082301	138415028
Sptlc3	ENSMUSG00000039092	2	139319649	139463410
Ism1	ENSMUSG00000074766	2	139503914	139584317
Tasp1	ENSMUSG00000039033	2	139659216	139892541
Gm14071	ENSMUSG00000081799	2	139209568	139210076
Gm14070	ENSMUSG00000084207	2	139689033	139689460
Gm14068	ENSMUSG00000081446	2	139870228	139870440
Rps19-ps7	ENSMUSG00000080006	2	139898733	139899222
Gm14073	ENSMUSG00000083110	2	139935758	139936138
Gm14079	ENSMUSG00000080867	2	140053667	140054112
Esf1	ENSMUSG00000045624	2	139945619	139996300
Gm14061	ENSMUSG00000085911	2	138415128	138474858
Gm14063	ENSMUSG00000082331	2	138448350	138448658
Gm14065	ENSMUSG00000081009	2	138697759	138698343
Macrod2	ENSMUSG00000068205	2	140221045	142218702
Gm17374	ENSMUSG00000078197	2	139977779	139979268
2310003L22Rik	ENSMUSG00000027384	2	139996382	140030988
Sel1l2	ENSMUSG00000074764	2	140055591	140215442
Mir1952	ENSMUSG00000088983	2	138645665	138645743
U6	ENSMUSG00000065769	2	140266277	140266383
Flrt3	ENSMUSG00000051379	2	140476650	140497205
Flrt3	ENSMUSG00000079021	2	140476652	140497186
Gm14078	ENSMUSG00000081731	2	140781501	140781985
Gm14080	ENSMUSG00000083274	2	140953016	140953801
Gm14105	ENSMUSG00000074763	2	141055406	141061162
Gm14077	ENSMUSG00000086450	2	141056167	141112727
Fau-ps1	ENSMUSG00000082412	2	141664525	141665075
U6	ENSMUSG00000065347	2	141466226	141466332
7SK	ENSMUSG00000089318	2	142207724	142208027
Rpl26-ps5	ENSMUSG00000081125	2	142396244	142396702
Gm14081	ENSMUSG00000083215	2	142402664	142403593
4930511F01Rik	ENSMUSG00000086504	2	142728701	142729308
Kif16b	ENSMUSG00000038844	2	142443210	142727267
SNORA17	ENSMUSG00000088134	2	142612632	142612747
C630020P19Rik	ENSMUSG00000086171	2	143361212	143373573
Gm11644	ENSMUSG00000083787	2	143175248	143175397
Gm14083	ENSMUSG00000082903	2	142955456	142956075
Gm14082	ENSMUSG00000083047	2	142976566	142977366
Gm11645	ENSMUSG00000080895	2	143332147	143332795
Snrpb2	ENSMUSG00000008333	2	142888775	142898589
Otor	ENSMUSG00000027416	2	142904209	142907449
Pcsk2	ENSMUSG00000027419	2	143371892	143642021
Gm12360	ENSMUSG00000087115	2	143573319	143621701
Bfsp1	ENSMUSG00000027420	2	143652264	143688909
Dstn	ENSMUSG00000015932	2	143741056	143769060
Gm11654	ENSMUSG00000082987	2	143681385	143681812
Gm11673	ENSMUSG00000081293	2	143703685	143704015
Gm11686	ENSMUSG00000080711	2	143706913	143707245
Rrbp1	ENSMUSG00000027422	2	143773131	143836999
Banf2	ENSMUSG00000037307	2	143858795	143899715
Snx5	ENSMUSG00000027423	2	144075859	144096642
8430406I07Rik	ENSMUSG00000027424	2	144096399	144106963
Ovol2	ENSMUSG00000037279	2	144130911	144157882
Csrp2bp	ENSMUSG00000027425	2	144194719	144233412
6330439K17Rik	ENSMUSG00000037259	2	144296293	144353150
Gm12357	ENSMUSG00000086384	2	143884874	143894542
Gm11687	ENSMUSG00000082480	2	143968224	143969109
Gm5535	ENSMUSG00000074758	2	143998886	144015026
4930444E06Rik	ENSMUSG00000085127	2	144068977	144070585
Gm11688	ENSMUSG00000082436	2	144086970	144087277
1700108N11Rik	ENSMUSG00000084837	2	144157195	144158375
Gm11700	ENSMUSG00000081450	2	144181653	144182055
Gm11701	ENSMUSG00000082313	2	144189863	144191363
Zfp133-ps	ENSMUSG00000083674	2	144285016	144326003
SNORA70	ENSMUSG00000065725	2	144087325	144087462
Snord17	ENSMUSG00000077714	2	144091715	144091952
Polr3f	ENSMUSG00000027427	2	144353454	144367731
Rbbp9	ENSMUSG00000027428	2	144368001	144376605
Sec23b	ENSMUSG00000027429	2	144381965	144416485
Gm561	ENSMUSG00000074754	2	144419790	144421102
Dtd1	ENSMUSG00000027430	2	144425633	144594494
1700010M22Rik	ENSMUSG00000027431	2	144649402	144650151
Slc24a3	ENSMUSG00000063873	2	144993490	145467902
Gm11743	ENSMUSG00000084306	2	144582065	144584318
Gm11746	ENSMUSG00000082858	2	144756594	144757414
AL808119.1	ENSMUSG00000092833	2	144443879	144443969
Rin2	ENSMUSG00000001768	2	145610470	145713352
Naa20	ENSMUSG00000002728	2	145727835	145742161
Crnkl1	ENSMUSG00000001767	2	145743215	145760750
4930529M08Rik	ENSMUSG00000037143	2	145760520	146040775
Gm14093	ENSMUSG00000087158	2	145163384	145205117
Gm11759	ENSMUSG00000084178	2	145335930	145336393
Gm14092	ENSMUSG00000074753	2	145376388	145380718
BC039771	ENSMUSG00000087594	2	145501103	145579408
Gm11763	ENSMUSG00000081722	2	145527150	145527461
Gm11764	ENSMUSG00000083014	2	145717818	145718440
7SK	ENSMUSG00000088213	2	145307143	145307467
5S_rRNA	ENSMUSG00000088711	2	145178579	145178672
AL672100.1	ENSMUSG00000092758	2	145704022	145704209
Insm1	ENSMUSG00000068154	2	146047657	146050752
Ralgapa2	ENSMUSG00000037110	2	146065615	146337762
Plk1s1	ENSMUSG00000074749	2	146681600	146795833
Xrn2	ENSMUSG00000027433	2	146838732	146903736
Nkx2-4	ENSMUSG00000054160	2	146909052	146911181
Nkx2-2	ENSMUSG00000027434	2	147003282	147019979
Pax1	ENSMUSG00000037034	2	147187661	147219031
A930019D19Rik	ENSMUSG00000085958	2	146085022	146092896
Gm14117	ENSMUSG00000042938	2	146131283	146132125
4933406D12Rik	ENSMUSG00000085796	2	146368667	146371844
Gm14111	ENSMUSG00000080870	2	146580443	146581441
Gm14114	ENSMUSG00000087618	2	146654063	146665468
Gm14116	ENSMUSG00000082158	2	146972144	146972948
Nkx2-2as	ENSMUSG00000086509	2	147009819	147157417
6430503K07Rik	ENSMUSG00000053545	2	147013160	147014143
Gm14115	ENSMUSG00000081971	2	147106339	147106820
Gm14113	ENSMUSG00000084371	2	147115491	147116466
Gm14110	ENSMUSG00000084774	2	147149298	147150823
AI646519	ENSMUSG00000087521	2	147187277	147188145
Gm14109	ENSMUSG00000083126	2	147228690	147228998
Gm14107	ENSMUSG00000080844	2	147468584	147468913
Gm14106	ENSMUSG00000081741	2	147493751	147494188
A530006G24Rik	ENSMUSG00000051986	2	147536429	147543368
7SK	ENSMUSG00000089316	2	147076198	147076521
U3	ENSMUSG00000087901	2	146369234	146369361
Rspo4	ENSMUSG00000032852	2	151668663	151700404
Angpt4	ENSMUSG00000027460	2	151736943	151771073
Fam110a	ENSMUSG00000027459	2	151795134	151805955
Slc52a3	ENSMUSG00000027463	2	151822247	151834994
Scrt2	ENSMUSG00000060257	2	151907265	151921538
Srxn1	ENSMUSG00000032802	2	151931252	151937112
Tcf15	ENSMUSG00000068079	2	151969297	151974833
Csnk2a1	ENSMUSG00000074698	2	152052575	152107588
Tbc1d20	ENSMUSG00000027465	2	152119564	152139732
Rbck1	ENSMUSG00000027466	2	152142070	152158389
Trib3	ENSMUSG00000032715	2	152163158	152169768
Nrsn2	ENSMUSG00000059361	2	152194491	152202374
Sox12	ENSMUSG00000051817	2	152219347	152223782
Zcchc3	ENSMUSG00000074682	2	152237692	152240780
6820408C15Rik	ENSMUSG00000032680	2	152241323	152270066
Defb23	ENSMUSG00000074681	2	152284791	152290356
Defb20	ENSMUSG00000049560	2	152302799	152305670
Defb22	ENSMUSG00000027468	2	152311399	152315874
Defb26	ENSMUSG00000074680	2	152333534	152337428
Defb28	ENSMUSG00000074679	2	152343991	152347183
Defb29	ENSMUSG00000044249	2	152364450	152365834
Gm17416	ENSMUSG00000090485	2	152395074	152395274
Defb21	ENSMUSG00000056544	2	152398480	152400680
Defb19	ENSMUSG00000050645	2	152401822	152406048
Defb45	ENSMUSG00000062124	2	152418927	152425135
Defb36	ENSMUSG00000044863	2	152430063	152438465
Defb25	ENSMUSG00000074678	2	152448092	152448789
Rem1	ENSMUSG00000000359	2	152452687	152460934
H13	ENSMUSG00000019188	2	152495197	152534406
Mcts2	ENSMUSG00000042814	2	152512884	152513676
Id1	ENSMUSG00000042745	2	152561987	152563146
Cox4i2	ENSMUSG00000009876	2	152579909	152590773
Bcl2l1	ENSMUSG00000007659	2	152593052	152657464
Tpx2	ENSMUSG00000027469	2	152673700	152721057
Mylk2	ENSMUSG00000027470	2	152737088	152748804
Foxs1	ENSMUSG00000074676	2	152757634	152758944
Dusp15	ENSMUSG00000042662	2	152766731	152777434
Ttll9	ENSMUSG00000074673	2	152788221	152834218
Pdrg1	ENSMUSG00000027472	2	152834626	152841163
Xkr7	ENSMUSG00000042631	2	152857588	152881511
BC020535	ENSMUSG00000027474	2	152891691	152907471
Hck	ENSMUSG00000003283	2	152934204	152977177
Tm9sf4	ENSMUSG00000068040	2	152987039	153036202
Tspyl3	ENSMUSG00000074671	2	153048116	153051177
Plagl2	ENSMUSG00000051413	2	153053495	153067162
Pofut1	ENSMUSG00000046020	2	153067269	153095983
Kif3b	ENSMUSG00000027475	2	153117149	153159126
Asxl1	ENSMUSG00000042548	2	153171581	153229743
8430427H17Rik	ENSMUSG00000061411	2	153233198	153355707
4930404H24Rik	ENSMUSG00000079001	2	153318526	153319577
Commd7	ENSMUSG00000056941	2	153442669	153458517
Dnmt3b	ENSMUSG00000027478	2	153475186	153513466
Mapre1	ENSMUSG00000027479	2	153567010	153599046
Efcab8	ENSMUSG00000044083	2	153606615	153670488
2500004C02Rik	ENSMUSG00000073236	2	153166893	153171809
Gm14472	ENSMUSG00000082283	2	153239585	153239866
AA387200	ENSMUSG00000085946	2	151900591	151902544
Rps15a-ps7	ENSMUSG00000081087	2	152011027	152011418
Gm17559	ENSMUSG00000090656	2	152520469	152522428
Gm14164	ENSMUSG00000068062	2	152171405	152201060
Gm14165	ENSMUSG00000081434	2	152179351	152180302
Gm14158	ENSMUSG00000083230	2	152283507	152283814
Gm14156	ENSMUSG00000082689	2	152293130	152293612
Gm14161	ENSMUSG00000084935	2	152375450	152379668
Gm14163	ENSMUSG00000089684	2	152434910	152435126
1700030C14Rik	ENSMUSG00000087148	2	152478619	152480066
Gm14162	ENSMUSG00000082318	2	152571419	152572043
Gm14199	ENSMUSG00000089898	2	152815753	152817367
Gm14153	ENSMUSG00000083088	2	151622843	151623981
Gm14155	ENSMUSG00000087033	2	151654803	151657844
Gm14157	ENSMUSG00000086620	2	151691051	151692696
Gm14154	ENSMUSG00000087004	2	151773009	151776377
7530422B04Rik	ENSMUSG00000079000	2	153474426	153476022
Gm14490	ENSMUSG00000082079	2	153522388	153555641
AL731857.1	ENSMUSG00000093306	2	152598524	152598625
AL833801.1	ENSMUSG00000093746	2	152690803	152690862
Mir1953	ENSMUSG00000088491	2	151793265	151793353
U6	ENSMUSG00000089499	2	152980749	152980851
Sun5	ENSMUSG00000027480	2	153681924	153696820
Bpifb2	ENSMUSG00000027481	2	153700781	153721006
Bpifb6	ENSMUSG00000068009	2	153726124	153738531
Bpifb3	ENSMUSG00000068008	2	153743966	153758732
Bpifb4	ENSMUSG00000074665	2	153763948	153789837
Bpifa6	ENSMUSG00000078998	2	153800681	153826231
Bpifa2	ENSMUSG00000042459	2	153834001	153841815
Gm14494	ENSMUSG00000083097	2	153651789	153652570
Bpifa3	ENSMUSG00000027482	2	153956072	153964092
Bpifa1	ENSMUSG00000027483	2	153968616	153974955
Bpifa5	ENSMUSG00000027484	2	153988343	153994186
Bpifb1	ENSMUSG00000027485	2	154016554	154046105
Bpifb5	ENSMUSG00000038572	2	154049478	154066638
Bpifb9a	ENSMUSG00000067998	2	154083590	154096981
Bpifb9b	ENSMUSG00000067996	2	154132963	154146382
Cdk5rap1	ENSMUSG00000027487	2	154161116	154198746
Snta1	ENSMUSG00000027488	2	154202049	154233835
Cbfa2t2	ENSMUSG00000038533	2	154262217	154365092
Necab3	ENSMUSG00000027489	2	154370135	154384626
1700003F12Rik	ENSMUSG00000038523	2	154372821	154375739
1700007I08Rik	ENSMUSG00000078129	2	154377512	154379012
E2f1	ENSMUSG00000027490	2	154385143	154395628
Pxmp4	ENSMUSG00000000876	2	154411494	154429444
Zfp341	ENSMUSG00000059842	2	154439033	154472557
Chmp4b	ENSMUSG00000038467	2	154477441	154520521
Raly	ENSMUSG00000027593	2	154616832	154692997
a	ENSMUSG00000027596	2	154617138	154876748
Eif2s2	ENSMUSG00000074656	2	154697146	154718671
Gm14497	ENSMUSG00000081013	2	153912571	153913150
Gm14197	ENSMUSG00000083732	2	154109949	154110997
Gm14198	ENSMUSG00000085483	2	154455738	154458372
Gm14217	ENSMUSG00000082064	2	154529545	154530435
Gm14215	ENSMUSG00000083975	2	154539238	154539458
Gm14216	ENSMUSG00000085691	2	154548088	154564187
Gm14214	ENSMUSG00000082493	2	154594991	154595766
Gm14226	ENSMUSG00000084897	2	154844002	154852840
Ahcy	ENSMUSG00000027597	2	154885046	154900233
Itch	ENSMUSG00000027598	2	154959245	155052591
Dynlrb1	ENSMUSG00000047459	2	155062269	155076013
Pigu	ENSMUSG00000038383	2	155072732	155183166
Map1lc3a	ENSMUSG00000027602	2	155102033	155103809
Trp53inp2	ENSMUSG00000038375	2	155206795	155215586
Ncoa6	ENSMUSG00000038369	2	155216401	155299630
Ggt7	ENSMUSG00000027603	2	155316115	155343973
Acss2	ENSMUSG00000027605	2	155343684	155411460
Gss	ENSMUSG00000027610	2	155388917	155418546
Myh7b	ENSMUSG00000074652	2	155436948	155460043
Trpc4ap	ENSMUSG00000038324	2	155460007	155518120
Edem2	ENSMUSG00000038312	2	155527413	155555211
Gm17581	ENSMUSG00000092123	2	155561546	155561602
Procr	ENSMUSG00000027611	2	155576853	155581207
Mmp24	ENSMUSG00000027612	2	155601078	155644102
Eif6	ENSMUSG00000027613	2	155645568	155652661
Fam83c	ENSMUSG00000074647	2	155653284	155660590
Uqcc	ENSMUSG00000005882	2	155672630	155756046
Gm15557	ENSMUSG00000078972	2	155766464	155768486
Gdf5	ENSMUSG00000038259	2	155766759	155771103
Cep250	ENSMUSG00000038241	2	155782194	155824636
2310005A03Rik	ENSMUSG00000087254	2	154923525	154925817
Gm14227	ENSMUSG00000082596	2	155024368	155024996
Gm14239	ENSMUSG00000080237	2	155285237	155286628
Gm14238	ENSMUSG00000083341	2	155311783	155312105
RP23-260N23.12	ENSMUSG00000093624	2	155368383	155368673
RP23-260N23.13	ENSMUSG00000093687	2	155372121	155372582
4930471I20Rik	ENSMUSG00000086529	2	155372776	155382666
Gm14256	ENSMUSG00000085317	2	155416867	155418587
0610038P03Rik	ENSMUSG00000085010	2	155418055	155420691
Gm14257	ENSMUSG00000087616	2	155419301	155420211
BC029722	ENSMUSG00000074649	2	155643466	155645162
Gm16098	ENSMUSG00000086754	2	155652524	155653689
Mir695	ENSMUSG00000076216	2	155182553	155182661
SNORA70	ENSMUSG00000088695	2	155478628	155478760
Mir499	ENSMUSG00000076312	2	155448616	155448694
6430550D23Rik	ENSMUSG00000074646	2	155799015	155833713
Ergic3	ENSMUSG00000005881	2	155833781	155844015
Fer1l4	ENSMUSG00000013338	2	155844875	155878683
Spag4	ENSMUSG00000038180	2	155890911	155896353
Cpne1	ENSMUSG00000074643	2	155897581	155937695
Nfs1	ENSMUSG00000027618	2	155904665	155969922
Rbm12	ENSMUSG00000089824	2	155917694	155937714
Gm14240	ENSMUSG00000081002	2	155881864	155882409
Romo1	ENSMUSG00000067847	2	155969775	155971533
Rbm39	ENSMUSG00000027620	2	155972975	156005974
Phf20	ENSMUSG00000038116	2	156022202	156135688
Scand1	ENSMUSG00000046229	2	156137583	156138440
4921517L17Rik	ENSMUSG00000038085	2	156138035	156201374
2900097C17Rik	ENSMUSG00000067833	2	156218227	156218565
Epb4.1l1	ENSMUSG00000027624	2	156246645	156368950
0610011L14Rik	ENSMUSG00000027628	2	156373320	156394708
Dlgap4	ENSMUSG00000061689	2	156439441	156590099
Myl9	ENSMUSG00000067818	2	156601156	156607394
Tgif2	ENSMUSG00000062175	2	156665813	156681306
4930518I15Rik	ENSMUSG00000074629	2	156682352	156683682
1110008F13Rik	ENSMUSG00000027637	2	156688864	156699299
Sla2	ENSMUSG00000027636	2	156698193	156712928
Ndrg3	ENSMUSG00000027634	2	156753081	156817792
Gm14251	ENSMUSG00000081751	2	156148138	156148416
Gm14252	ENSMUSG00000085546	2	156158053	156165117
[truncated: 13,121 more rows]

## Sheet: longevityIgG2b-PT
Gene Name	Ensembl Gene ID	Chromosome	Start	End
Tsga10	ENSMUSG00000060771	1	37811417	37922143
Lipt1	ENSMUSG00000037216	1	37928583	37934232
Mitd1	ENSMUSG00000026088	1	37931646	37947256
Mrpl30	ENSMUSG00000026087	1	37947322	37955380
Lyg2	ENSMUSG00000061584	1	37962766	37973338
Lyg1	ENSMUSG00000026085	1	38003581	38014604
Txndc9	ENSMUSG00000058407	1	38040712	38054191
Eif5b	ENSMUSG00000026083	1	38054855	38112424
Rev1	ENSMUSG00000026082	1	38109632	38186507
Aff3	ENSMUSG00000037138	1	38234171	38721800
Lonrf2	ENSMUSG00000048814	1	38850514	38892935
Chst10	ENSMUSG00000026080	1	38920722	38955005
Nms	ENSMUSG00000067604	1	38995994	39007123
Pdcl3	ENSMUSG00000026078	1	39044659	39054081
Npas2	ENSMUSG00000026077	1	39250576	39420079
Rpl31	ENSMUSG00000073702	1	39424696	39428753
Tbc1d8	ENSMUSG00000003134	1	39428344	39535592
D1Bwg0212e	ENSMUSG00000003135	1	39591837	39603726
Rnf149	ENSMUSG00000048234	1	39608141	39634250
Creg2	ENSMUSG00000050967	1	39675251	39708027
Rfx8	ENSMUSG00000057173	1	39722151	39777842
Gm15457	ENSMUSG00000087374	1	37990441	38010981
Gm16150	ENSMUSG00000085391	1	38292265	38303511
Gm16151	ENSMUSG00000085280	1	38364747	38368775
Gm16152	ENSMUSG00000087131	1	38441794	38450819
Gm20428	ENSMUSG00000092553	1	39333128	39333410
Gm3617	ENSMUSG00000092563	1	39371744	39372298
Gm15832	ENSMUSG00000085894	1	39604415	39608847
Gm17715	ENSMUSG00000092106	1	37922144	37928233
D930019O06Rik	ENSMUSG00000090677	1	39707021	39714235
SNORA33	ENSMUSG00000064936	1	39630591	39630720
7SK	ENSMUSG00000089141	1	38030812	38031048
Snord89	ENSMUSG00000077704	1	39605590	39605699
U3	ENSMUSG00000065629	1	39576378	39576591
Ush2a	ENSMUSG00000026609	1	190085902	190788920
Kctd3	ENSMUSG00000026608	1	190794977	190831719
Kcnk2	ENSMUSG00000037624	1	191031816	191167711
Cenpf	ENSMUSG00000026605	1	191464478	191511965
Ptpn14	ENSMUSG00000026604	1	191552147	191700574
Smyd2	ENSMUSG00000026603	1	191704371	191746242
Prox1	ENSMUSG00000010175	1	191941917	191994559
Rps6kc1	ENSMUSG00000089872	1	192524081	192735649
Gm17653	ENSMUSG00000090445	1	191657020	191660499
Gm17566	ENSMUSG00000079045	1	191994175	192041155
mmu-mir-1194	ENSMUSG00000080505	1	191217229	191217349
AC124613.1	ENSMUSG00000093064	1	192306751	192307036
U6	ENSMUSG00000084550	1	190584355	190584458
Ptpra	ENSMUSG00000027303	2	130276014	130380036
Fam113a	ENSMUSG00000037773	2	130242983	130250437
4933425O20Rik	ENSMUSG00000049692	2	130232214	130233635
Mrps26	ENSMUSG00000037740	2	130389478	130394431
Oxt	ENSMUSG00000027301	2	130401909	130402790
Avp	ENSMUSG00000037727	2	130406356	130408290
Ubox5	ENSMUSG00000027300	2	130415738	130455774
Fastkd5	ENSMUSG00000079043	2	130439576	130455763
Prosapip1	ENSMUSG00000037703	2	130458575	130468539
Ddrgk1	ENSMUSG00000068290	2	130479696	130490395
Itpa	ENSMUSG00000074797	2	130493346	130507350
Slc4a11	ENSMUSG00000074796	2	130509849	130523255
Ckap2l	ENSMUSG00000048327	2	129093946	129122948
Il1a	ENSMUSG00000027399	2	129125346	129135708
Vps16	ENSMUSG00000027411	2	130250075	130270005
Atrn	ENSMUSG00000027312	2	130732231	130856069
4930402H24Rik	ENSMUSG00000027309	2	130531936	130732142
Il1b	ENSMUSG00000027398	2	129190306	129196875
F830045P16Rik	ENSMUSG00000043727	2	129284095	129362338
Sirpa	ENSMUSG00000037902	2	129418571	129457964
Pdyn	ENSMUSG00000027400	2	129512301	129525580
Stk35	ENSMUSG00000037885	2	129626253	129658023
Gfra4	ENSMUSG00000027316	2	130865368	130868824
Adam33	ENSMUSG00000027318	2	130876327	130889550
Tgm3	ENSMUSG00000027401	2	129838085	129876135
Tgm6	ENSMUSG00000027403	2	129938152	129979968
Snrpb	ENSMUSG00000027404	2	129997150	130005139
Tmc2	ENSMUSG00000060332	2	130020930	130090181
Nop56	ENSMUSG00000027405	2	130100166	130105049
Idh3b	ENSMUSG00000027406	2	130105045	130110283
Polr1b	ENSMUSG00000027395	2	128926731	128952330
Chchd5	ENSMUSG00000037938	2	128955436	128959870
Slc20a1	ENSMUSG00000027397	2	129024500	129037352
AI847159	ENSMUSG00000084826	2	128984402	129006403
Gm14026	ENSMUSG00000082274	2	128994436	128996224
Gm14029	ENSMUSG00000086652	2	129008218	129009683
9830144P21Rik	ENSMUSG00000087528	2	129031694	129056315
A730036I17Rik	ENSMUSG00000056738	2	129044705	129061340
Gm14024	ENSMUSG00000085485	2	129072112	129094262
Gm14023	ENSMUSG00000085498	2	129123106	129133562
Gm14039	ENSMUSG00000082097	2	129188495	129188595
Gm14047	ENSMUSG00000074805	2	129195633	129201484
Gm14045	ENSMUSG00000081888	2	129204007	129205132
Gm14040	ENSMUSG00000086637	2	129319306	129341543
Gm14041	ENSMUSG00000087015	2	129390783	129391804
Gm14046	ENSMUSG00000084328	2	129575637	129576145
Gm14043	ENSMUSG00000083589	2	129599432	129599659
AU015228	ENSMUSG00000074804	2	129926130	129929111
Gm14044	ENSMUSG00000083483	2	130210581	130211086
Gm14042	ENSMUSG00000082985	2	130226173	130227005
4930473A02Rik	ENSMUSG00000060029	2	130369527	130389485
Gm14057	ENSMUSG00000089662	2	130629237	130629718
A730017L22Rik	ENSMUSG00000085566	2	130698795	130732132
Gm14048	ENSMUSG00000080989	2	130706602	130707869
Gm14049	ENSMUSG00000083953	2	130813720	130814355
Ebf4	ENSMUSG00000053552	2	130120905	130196217
1700020A23Rik	ENSMUSG00000027409	2	130230995	130231810
Cpxm1	ENSMUSG00000027408	2	130216511	130223310
Siglec1	ENSMUSG00000027322	2	130894956	130912501
Snord57	ENSMUSG00000065272	2	130103752	130103823
AL731707.1	ENSMUSG00000077004	2	130357414	130357480
7SK	ENSMUSG00000084694	2	130531064	130531432
U12	ENSMUSG00000065057	2	129141065	129141215
AL833804.1	ENSMUSG00000093645	2	130102931	130103016
Snord110	ENSMUSG00000080610	2	130101242	130101309
SNORA51	ENSMUSG00000065287	2	130101973	130102105
SNORA17	ENSMUSG00000077348	2	129911777	129911905
SNORA17	ENSMUSG00000089152	2	129897460	129897546
SNORD56	ENSMUSG00000065289	2	130103433	130103502
Gm14232	ENSMUSG00000087405	2	130985273	130997078
Hspa12b	ENSMUSG00000074793	2	130953016	130972057
Gm11037	ENSMUSG00000079039	2	130959233	130959951
1700037H04Rik	ENSMUSG00000027327	2	130972060	130985817
Spef1	ENSMUSG00000027329	2	130995997	131013018
Cenpb	ENSMUSG00000068267	2	131000918	131005803
Cdc25b	ENSMUSG00000027330	2	131012685	131024233
2310035K24Rik	ENSMUSG00000068264	2	131032814	131039250
Mavs	ENSMUSG00000037523	2	131059799	131073761
Pank2	ENSMUSG00000037514	2	131088231	131124924
Gm14233	ENSMUSG00000086329	2	131124281	131125571
Rnf24	ENSMUSG00000048911	2	131123800	131178628
Mir103-2	ENSMUSG00000065563	2	131113788	131113873
Gm14284	ENSMUSG00000082044	2	131147824	131148102
Gm14283	ENSMUSG00000081652	2	131240657	131240981
RNaseP_nuc	ENSMUSG00000089113	2	131239397	131239698
Adra1d	ENSMUSG00000027335	2	131371586	131388021
Gm14304	ENSMUSG00000083671	2	131279864	131280376
Smox	ENSMUSG00000027333	2	131317232	131351658
Gm14285	ENSMUSG00000087524	2	131387350	131388915
AL831731.1	ENSMUSG00000092654	2	131393747	131393818
4930425F17Rik	ENSMUSG00000062501	2	131473561	131474330
Gm14280	ENSMUSG00000086831	2	131478633	131547574
Erv3	ENSMUSG00000037482	2	131679414	131685483
5330413P13Rik	ENSMUSG00000086822	2	131645742	131673396
Gm14282	ENSMUSG00000081422	2	131671092	131671331
Gm14281	ENSMUSG00000083469	2	131672131	131673424
Prnd	ENSMUSG00000027338	2	131735693	131781866
Prnp	ENSMUSG00000079037	2	131735664	131764165
Lamr1-ps1	ENSMUSG00000081229	2	131729822	131730695
Rassf2	ENSMUSG00000027339	2	131815151	131855994
Gm14052	ENSMUSG00000082990	2	131925605	131926635
Gm14051	ENSMUSG00000086756	2	131970269	132045986
Slc23a2	ENSMUSG00000027340	2	131878232	131970844
5730494N06Rik	ENSMUSG00000027341	2	132065228	132073543
AV099323	ENSMUSG00000087377	2	132079093	132087069
Pcna	ENSMUSG00000027342	2	132074898	132079050
Cds2	ENSMUSG00000058793	2	132088884	132137786
Ccbl2	ENSMUSG00000040213	3	142364015	142407874
Gtf2b	ENSMUSG00000028271	3	142428190	142446567
Pkn2	ENSMUSG00000004591	3	142453866	142544968
Gm2574	ENSMUSG00000078162	3	142625525	142626756
Lmo4	ENSMUSG00000028266	3	143851494	143868184
Hs2st1	ENSMUSG00000040151	3	144094067	144233145
Sep15	ENSMUSG00000037072	3	144233268	144260644
Gm15540	ENSMUSG00000086561	3	142406625	142407645
9530052C20Rik	ENSMUSG00000090913	3	142545459	142557608
SNORA2	ENSMUSG00000064960	3	144249789	144249916
SNORA4	ENSMUSG00000088851	3	143337907	143338031
SNORA17	ENSMUSG00000087795	3	142458066	142458158
U6	ENSMUSG00000065130	3	142435936	142436040
Sh3glb1	ENSMUSG00000037062	3	144347972	144383287
Runx1t1	ENSMUSG00000006586	4	13670583	13820796
Slc26a7	ENSMUSG00000040569	4	14429577	14548952
Lrrc69	ENSMUSG00000023151	4	14550767	14723207
Otud6b	ENSMUSG00000040550	4	14736645	14753734
Tmem55a	ENSMUSG00000028221	4	14791223	14842323
Necab1	ENSMUSG00000040536	4	14879392	15076941
Tmem64	ENSMUSG00000043252	4	15192978	15213900
Gm11838	ENSMUSG00000083280	4	14693482	14693712
Gm11836	ENSMUSG00000081239	4	14361038	14361478
1700120G11Rik	ENSMUSG00000086068	4	14146643	14164597
Gm11823	ENSMUSG00000086927	4	13847101	13922340
Gm11824	ENSMUSG00000082128	4	14097213	14098058
Gm11837	ENSMUSG00000086587	4	14857055	14880177
Gm11844	ENSMUSG00000087241	4	14949729	14959134
Gm11845	ENSMUSG00000083073	4	15081539	15081865
Gm11856	ENSMUSG00000080869	4	15413513	15413937
Gm11859	ENSMUSG00000083330	4	15458804	15459258
Gm11857	ENSMUSG00000082673	4	15563316	15563639
Gm11858	ENSMUSG00000084181	4	15668077	15668914
U6	ENSMUSG00000070270	4	15310295	15310401
SNORA17	ENSMUSG00000077701	4	14006956	14007087
SNORA17	ENSMUSG00000087919	4	14166765	14166891
Calb1	ENSMUSG00000028222	4	15808411	15835211
Decr1	ENSMUSG00000028223	4	15844387	15872654
Gm11855	ENSMUSG00000081026	4	15746221	15748517
AL928542.1	ENSMUSG00000080470	4	15747056	15747176
SNORA17	ENSMUSG00000088055	4	15838714	15838781
Nbn	ENSMUSG00000028224	4	15885072	15919736
Osgin2	ENSMUSG00000041153	4	15924268	15941035
Ripk2	ENSMUSG00000041135	4	16049880	16090794
Gm11869	ENSMUSG00000084190	4	15896719	15897075
Gm11870	ENSMUSG00000084408	4	15938152	15939473
Gm11874	ENSMUSG00000081679	4	16047906	16048035
A530072M11Rik	ENSMUSG00000085112	4	16091257	16193372
Gm11865	ENSMUSG00000083725	4	16173416	16176661
U7	ENSMUSG00000088612	4	15981421	15981485
AL807379.1	ENSMUSG00000092822	4	16056713	16056822
1700009N14Rik	ENSMUSG00000028287	4	39397328	39398809
Gm12378	ENSMUSG00000080057	4	37917907	37919367
Gm12379	ENSMUSG00000082899	4	37975878	37976306
Gm12380	ENSMUSG00000084148	4	38210951	38211494
Gm12381	ENSMUSG00000085632	4	38518700	38802516
Gm12382	ENSMUSG00000081427	4	38610842	38611763
Gm12383	ENSMUSG00000082238	4	39210577	39211336
Gm17094	ENSMUSG00000090839	4	39345078	39397282
Gm12385	ENSMUSG00000082302	4	39714651	39715445
Gm12384	ENSMUSG00000083271	4	39770463	39771381
Gm12386	ENSMUSG00000082022	4	39791220	39791907
Gm12387	ENSMUSG00000084220	4	39842241	39843195
U2	ENSMUSG00000088339	4	39812720	39812801
SNORA17	ENSMUSG00000077738	4	39242496	39242621
U1	ENSMUSG00000065344	4	39206664	39206827
U7	ENSMUSG00000088526	4	39928530	39928591
Gm12388	ENSMUSG00000083202	4	40016134	40018020
Gm12389	ENSMUSG00000081352	4	40063849	40064266
Aco1	ENSMUSG00000028405	4	40090114	40146042
Ddx58	ENSMUSG00000040296	4	40150806	40186861
Topors	ENSMUSG00000036822	4	40206634	40216883
Ndufb6	ENSMUSG00000071014	4	40217624	40226454
2010003O02Rik	ENSMUSG00000028407	4	40216602	40217973
4930509K18Rik	ENSMUSG00000087137	4	40260265	40264752
SNORA40	ENSMUSG00000089585	4	40405972	40406066
Tmem215	ENSMUSG00000046593	4	40419213	40424201
4933428C19Rik	ENSMUSG00000086355	4	40429873	40472581
Aptx	ENSMUSG00000028411	4	40629415	40650227
Gm12391	ENSMUSG00000081720	4	40625365	40625811
Gm12390	ENSMUSG00000082008	4	40663628	40664024
Coq2	ENSMUSG00000029319	5	101083742	101104159
Hpse	ENSMUSG00000035273	5	101108503	101148735
Helq	ENSMUSG00000035266	5	101191164	101227619
Mrps18c	ENSMUSG00000016833	5	101227646	101233490
Fam175a	ENSMUSG00000035234	5	101234211	101249984
Agpat9	ENSMUSG00000029314	5	101274732	101328121
Nkx6-1	ENSMUSG00000035187	5	102087158	102094245
Cds1	ENSMUSG00000029330	5	102194149	102252877
Wdfy3	ENSMUSG00000043940	5	102261972	102498940
Arhgap24	ENSMUSG00000057315	5	102910410	103326955
Gm15777	ENSMUSG00000085269	5	101099878	101107124
4930458D05Rik	ENSMUSG00000087611	5	101269816	101276186
Gm20484	ENSMUSG00000092503	5	102028333	102031394
Gm20548	ENSMUSG00000092354	5	102266435	102275429
SNORA42	ENSMUSG00000077354	5	101260300	101260433
Mapk10	ENSMUSG00000046709	5	103336967	103640353
Pde6b	ENSMUSG00000029491	5	108817410	108861416
Atp5k	ENSMUSG00000050856	5	108862263	108863467
Mfsd7a	ENSMUSG00000029490	5	108870073	108877910
Pcgf3	ENSMUSG00000033623	5	108890251	108935995
Cplx1	ENSMUSG00000033615	5	108947573	108979043
Gak	ENSMUSG00000062234	5	108998430	109058758
Tmem175	ENSMUSG00000013495	5	109058789	109076789
Dgkq	ENSMUSG00000004815	5	109075712	109098691
Idua	ENSMUSG00000033540	5	109089350	109113576
Slc26a1	ENSMUSG00000046959	5	109098897	109104588
Fgfrl1	ENSMUSG00000008090	5	109123248	109135969
Rnf212	ENSMUSG00000055385	5	109158481	109178467
Tmed11	ENSMUSG00000004821	5	109206254	109224382
Vmn2r8	ENSMUSG00000090961	5	109226212	109237773
Vmn2r9	ENSMUSG00000091624	5	109271966	109281529
Vmn2r10	ENSMUSG00000067010	5	109422431	109435490
Vmn2r11	ENSMUSG00000091450	5	109475892	109488471
Vmn2r12	ENSMUSG00000090688	5	109514868	109526883
Vmn2r13	ENSMUSG00000091635	5	109585087	109621126
Vmn2r14	ENSMUSG00000091059	5	109644521	109653641
Vmn2r15	ENSMUSG00000091375	5	109715288	109726575
Vmn2r16	ENSMUSG00000092080	5	109759400	109793500
Vmn2r17	ENSMUSG00000091879	5	109849032	109882406
Crlf2	ENSMUSG00000033467	5	109983730	109988012
5430403G16Rik	ENSMUSG00000072763	5	110103564	110120060
4930522L14Rik	ENSMUSG00000072762	5	110165009	110180905
Gm15446	ENSMUSG00000090015	5	110352419	110372955
Zfp932	ENSMUSG00000066613	5	110425540	110439430
Gm17655	ENSMUSG00000090963	5	110475251	110475505
Plcxd1	ENSMUSG00000064247	5	110528988	110534972
Gtpbp6	ENSMUSG00000033434	5	110532994	110537216
Zfp605	ENSMUSG00000023284	5	110539111	110560756
Chfr	ENSMUSG00000014668	5	110564859	110600991
Golga3	ENSMUSG00000029502	5	110605720	110655489
Ankle2	ENSMUSG00000029501	5	110660060	110685666
Pgam5	ENSMUSG00000029500	5	110688149	110698932
Pxmp2	ENSMUSG00000029499	5	110703301	110715205
Pole	ENSMUSG00000007080	5	110715325	110766493
P2rx2	ENSMUSG00000029503	5	110768831	110772168
Gm1679	ENSMUSG00000072754	5	110783115	110785106
Fbrsl1	ENSMUSG00000043323	5	110790773	110877522
Gm17724	ENSMUSG00000090661	5	110814854	110817092
1010001B22Rik	ENSMUSG00000091434	5	110424530	110425417
Gm16739	ENSMUSG00000085131	5	110351668	110352500
Gm10086	ENSMUSG00000060730	5	108946182	108946589
Gm18594	ENSMUSG00000093756	5	109250740	109252142
RP24-465G18.2	ENSMUSG00000093479	5	109278800	109378274
Vmn2r-ps21	ENSMUSG00000093510	5	109301674	109321399
Gm18595	ENSMUSG00000093725	5	109401816	109404914
Gm5871	ENSMUSG00000093545	5	109445217	109445934
Gm8473	ENSMUSG00000093543	5	109665563	109667447
Gm7171	ENSMUSG00000093663	5	109825349	109831111
Gm8488	ENSMUSG00000093688	5	109956479	109958489
Gm8508	ENSMUSG00000049477	5	110186541	110186950
Gm15484	ENSMUSG00000081865	5	110547041	110547868
Gm15787	ENSMUSG00000086247	5	110583419	110605523
Gm15788	ENSMUSG00000087439	5	110691180	110706286
Gm15791	ENSMUSG00000081256	5	110757223	110757541
Gm15792	ENSMUSG00000085606	5	110760225	110762222
Gm16728	ENSMUSG00000087494	5	110688182	110698866
SNORA70	ENSMUSG00000087722	5	110757051	110757202
Galnt9	ENSMUSG00000033316	5	110973364	111050401
Noc4l	ENSMUSG00000033294	5	111077437	111082436
Ddx51	ENSMUSG00000029504	5	111082470	111089515
Ep400	ENSMUSG00000029505	5	111093392	111199736
Pus1	ENSMUSG00000029507	5	111202686	111209678
Ulk1	ENSMUSG00000029512	5	111213507	111239116
Hscb	ENSMUSG00000043510	5	111258089	111268796
Chek2	ENSMUSG00000029521	5	111269036	111303152
A630023P12Rik	ENSMUSG00000048215	5	110943942	110954999
Gm15559	ENSMUSG00000086401	5	111199968	111208279
Ttc28	ENSMUSG00000033209	5	111308822	111718800
Gm15989	ENSMUSG00000081104	5	111334263	111334760
Gm17598	ENSMUSG00000091066	5	111208901	111210146
U6	ENSMUSG00000065775	5	111106143	111106249
SNORA49	ENSMUSG00000077254	5	111121068	111121200
U6	ENSMUSG00000065071	5	111186104	111186210
1700069L16Rik	ENSMUSG00000042184	5	114142431	114174781
Ficd	ENSMUSG00000053334	5	114185791	114190609
Sart3	ENSMUSG00000018974	5	114192455	114221658
Gm3511	ENSMUSG00000069196	5	114217108	114217421
Iscu	ENSMUSG00000025825	5	114222757	114228297
Tmem119	ENSMUSG00000054675	5	114243738	114250525
Selplg	ENSMUSG00000048163	5	114267807	114280510
Coro1c	ENSMUSG00000004530	5	114292445	114358767
Ssh1	ENSMUSG00000042121	5	114387103	114443903
Dao	ENSMUSG00000042096	5	114453712	114475458
Svop	ENSMUSG00000042078	5	114476919	114541579
Usp30	ENSMUSG00000029592	5	114550342	114573515
Alkbh2	ENSMUSG00000044339	5	114573935	114578227
Ung	ENSMUSG00000029591	5	114580395	114589332
Acacb	ENSMUSG00000042010	5	114596544	114700770
Foxn4	ENSMUSG00000042002	5	114704173	114723816
Myo1h	ENSMUSG00000066952	5	114764950	114814585
Kctd10	ENSMUSG00000001098	5	114813576	114830524
Ube3b	ENSMUSG00000029577	5	114830637	114871177
Mmab	ENSMUSG00000029575	5	114881043	114894068
Mvk	ENSMUSG00000041939	5	114894278	114910600
BC057022	ENSMUSG00000041930	5	115018025	115063229
Trpv4	ENSMUSG00000014158	5	115072161	115108430
Gltp	ENSMUSG00000011884	5	115119412	115140993
Tchp	ENSMUSG00000002486	5	115157769	115172336
Git2	ENSMUSG00000041890	5	115177416	115225526
Ankrd13a	ENSMUSG00000041870	5	115224686	115256209
1500011B03Rik	ENSMUSG00000072694	5	115258205	115263985
Gm20499	ENSMUSG00000092252	5	115259045	115273469
1500011B03Rik	ENSMUSG00000092279	5	115262802	115263954
2610524H06Rik	ENSMUSG00000092486	5	115271944	115273477
Gm13821	ENSMUSG00000078186	5	115292358	115292871
4930519G04Rik	ENSMUSG00000029564	5	115303673	115333668
Gm9936	ENSMUSG00000054123	5	115305767	115308691
Oasl2	ENSMUSG00000029561	5	115346943	115362243
Oasl1	ENSMUSG00000041827	5	115373249	115387924
2210016L21Rik	ENSMUSG00000029559	5	115392167	115399792
Hnf1a	ENSMUSG00000029556	5	115398370	115421076
Sppl3	ENSMUSG00000029550	5	115461146	115548799
Gm10401	ENSMUSG00000072693	5	115547698	115548304
Acads	ENSMUSG00000029545	5	115560308	115569355
Unc119b	ENSMUSG00000046562	5	115572559	115584984
Mlec	ENSMUSG00000048578	5	115592990	115608188
Cabp1	ENSMUSG00000029544	5	115618698	115644390
Pop5	ENSMUSG00000060152	5	115685845	115695360
Rnf10	ENSMUSG00000041740	5	115691421	115722907
Coq5	ENSMUSG00000041733	5	115729675	115746981
Dynll1	ENSMUSG00000009013	5	115747119	115751008
Srsf9	ENSMUSG00000029538	5	115777186	115783089
Gatc	ENSMUSG00000029536	5	115783251	115791187
Triap1	ENSMUSG00000029535	5	115791234	115793578
Cox6a1	ENSMUSG00000041697	5	115795651	115798990
Msi1	ENSMUSG00000054256	5	115879608	115905707
4930430O22Rik	ENSMUSG00000057354	5	115886077	115886615
Pla2g1b	ENSMUSG00000029522	5	115916271	115924731
Sirt4	ENSMUSG00000029524	5	115928019	115934734
Pxn	ENSMUSG00000029528	5	115956685	116005996
Rplp0	ENSMUSG00000067274	5	116009476	116013736
Gcn1l1	ENSMUSG00000041638	5	116015263	116072665
Rab35	ENSMUSG00000029518	5	116081938	116097745
Ccdc64	ENSMUSG00000041609	5	116098184	116181630
Gm17122	ENSMUSG00000090458	5	114292610	114293125
Gm16108	ENSMUSG00000089734	5	114515470	114539475
Gm13784	ENSMUSG00000084243	5	114687185	114687934
Gm13789	ENSMUSG00000085590	5	114813424	114815366
Gm13790	ENSMUSG00000086302	5	115001298	115004025
4930515G01Rik	ENSMUSG00000092183	5	115223746	115224992
Gm13820	ENSMUSG00000078187	5	115266974	115267111
Gm13819	ENSMUSG00000082052	5	115278582	115279224
Gm13823	ENSMUSG00000080707	5	115317690	115318034
Gm13822	ENSMUSG00000087477	5	115367327	115373286
Gm13824	ENSMUSG00000086054	5	115418793	115448055
Gm13825	ENSMUSG00000086140	5	115418832	115421409
Gm13827	ENSMUSG00000086167	5	115503430	115503855
Gm13826	ENSMUSG00000072692	5	115552931	115560277
Gm13828	ENSMUSG00000083182	5	115648352	115648714
Gm13831	ENSMUSG00000083875	5	115713102	115713403
Gm13829	ENSMUSG00000082610	5	115741772	115741909
Gm13830	ENSMUSG00000086368	5	115751129	115769217
4930401G09Rik	ENSMUSG00000086352	5	115808709	115810132
Gm13832	ENSMUSG00000087292	5	115809087	115872872
Gm13836	ENSMUSG00000081282	5	115941900	115942464
Gm13840	ENSMUSG00000086849	5	115965272	115965956
U4	ENSMUSG00000075998	5	115939468	115939608
U6	ENSMUSG00000065320	5	114378733	114378813
U4	ENSMUSG00000075779	5	115940263	115940403
Cit	ENSMUSG00000029516	5	116295287	116458956
Gm13841	ENSMUSG00000083833	5	116251568	116252219
Prkab1	ENSMUSG00000029513	5	116463595	116474517
Tmem233	ENSMUSG00000079278	5	116488764	116533253
Ccdc60	ENSMUSG00000043913	5	116574650	116738994
Gm14508	ENSMUSG00000085376	5	116459325	116466114
Gm13842	ENSMUSG00000084992	5	116476420	116479239
Gm17420	ENSMUSG00000090728	5	116482155	116482322
C330018A13Rik	ENSMUSG00000086655	5	116573623	116579119
Gm14507	ENSMUSG00000086122	5	116693715	116704962
Ptpn11	ENSMUSG00000043733	5	121580542	121641406
Rpl6	ENSMUSG00000029614	5	121654490	121659250
Gm15800	ENSMUSG00000042744	5	121670228	121818586
Trafd1	ENSMUSG00000042726	5	121821734	121835641
Naa25	ENSMUSG00000042719	5	121847945	121894387
Erp29	ENSMUSG00000029616	5	121878599	121902515
Tmem116	ENSMUSG00000029452	5	121901902	121974192
Adam1b	ENSMUSG00000062438	5	121950106	121952989
Adam1a	ENSMUSG00000072647	5	121968613	121971704
Mapkapk5	ENSMUSG00000029454	5	121968622	121995914
Aldh2	ENSMUSG00000029455	5	122016036	122043833
Acad12	ENSMUSG00000042647	5	122048293	122068947
Acad10	ENSMUSG00000029456	5	122071035	122110523
Brap	ENSMUSG00000029458	5	122110572	122137257
Atxn2	ENSMUSG00000042605	5	122161346	122266502
Sh2b3	ENSMUSG00000042594	5	122265497	122286868
Fam109a	ENSMUSG00000044134	5	122299037	122304608
Cux2	ENSMUSG00000042589	5	122307972	122500111
Myl2	ENSMUSG00000013936	5	122550960	122563481
Ccdc63	ENSMUSG00000043036	5	122558049	122588966
Ppp1cc	ENSMUSG00000004455	5	122608287	122625282
Hvcn1	ENSMUSG00000064267	5	122656813	122692306
Tctn1	ENSMUSG00000038593	5	122691296	122714469
Pptc7	ENSMUSG00000038582	5	122734374	122774290
Rad9b	ENSMUSG00000038569	5	122773232	122804242
Vps29	ENSMUSG00000029462	5	122804378	122814993
1500011H22Rik	ENSMUSG00000029463	5	122814589	122822373
Gpn3	ENSMUSG00000029464	5	122821885	122832911
Arpc3	ENSMUSG00000029465	5	122841887	122856188
Anapc7	ENSMUSG00000029466	5	122871702	122894921
Atp2a2	ENSMUSG00000029467	5	122903531	122952183
Ift81	ENSMUSG00000029469	5	123000213	123064527
P2rx7	ENSMUSG00000029468	5	123093920	123141441
Gm10064	ENSMUSG00000059352	5	123147205	123147612
P2rx4	ENSMUSG00000029470	5	123157593	123179747
Camkk2	ENSMUSG00000029471	5	123183213	123229391
Anapc5	ENSMUSG00000029472	5	123237478	123271348
Rnf34	ENSMUSG00000029474	5	123300197	123318954
Kdm2b	ENSMUSG00000029475	5	123320677	123465089
Orai1	ENSMUSG00000049686	5	123465083	123480459
Morn3	ENSMUSG00000029477	5	123485778	123497025
Tmem120b	ENSMUSG00000054434	5	123518424	123567758
Rhof	ENSMUSG00000029449	5	123553053	123582701
Gm15546	ENSMUSG00000082760	5	121921572	121922397
Gm15547	ENSMUSG00000082265	5	121980572	121980904
Gm16552	ENSMUSG00000089729	5	122167675	122177412
Cux2	ENSMUSG00000072641	5	122308562	122308977
Gm15637	ENSMUSG00000087386	5	122498391	122505663
Gm15481	ENSMUSG00000082645	5	122703011	122703549
Gm15842	ENSMUSG00000083909	5	122752431	122753048
Gm15846	ENSMUSG00000079906	5	122888605	122888924
A930024E05Rik	ENSMUSG00000056735	5	123439363	123448354
Gm6444	ENSMUSG00000080836	5	123516251	123516708
AI480526	ENSMUSG00000090086	5	123583732	123591675
Gm17627	ENSMUSG00000066418	5	123497382	123680880
U6	ENSMUSG00000088583	5	122956798	122956898
U1	ENSMUSG00000077347	5	121806853	121807010
SNORA42	ENSMUSG00000064841	5	121655019	121655152
Setd1b	ENSMUSG00000038384	5	123592202	123617444
Aacs	ENSMUSG00000029482	5	125956184	125997782
Tmem132b	ENSMUSG00000070498	5	126102858	126179143
Tmem132b	ENSMUSG00000029483	5	126259004	126268438
Gm4868	ENSMUSG00000091970	5	126328322	126329110
Tmem132c	ENSMUSG00000034324	5	127722178	128046163
1700085B03Rik	ENSMUSG00000087104	5	127737228	127762004
U6	ENSMUSG00000070220	5	126869918	126870024
U6	ENSMUSG00000084551	5	126994245	126994351
Slc15a4	ENSMUSG00000029416	5	128076034	128113267
Glt1d1	ENSMUSG00000049971	5	128112632	128189124
Tmem132d	ENSMUSG00000034310	5	128263861	128938937
Gm17132	ENSMUSG00000061331	5	128357703	128358860
Gm17131	ENSMUSG00000085328	5	128358901	128362746
AC166933.1	ENSMUSG00000077816	5	128941118	128941211
Fzd10	ENSMUSG00000081683	5	129106719	129109968
Piwil1	ENSMUSG00000029423	5	129242121	129261349
Rimbp2	ENSMUSG00000029420	5	129266276	129459237
5930412G12Rik	ENSMUSG00000072591	5	129084981	129106568
Fzd10	ENSMUSG00000089856	5	129106806	129109236
Stx2	ENSMUSG00000029428	5	129490432	129514449
Ran	ENSMUSG00000029430	5	129525944	129530198
Gpr133	ENSMUSG00000044017	5	129602625	129710474
Sfswap	ENSMUSG00000029439	5	130007106	130077258
Rps16-ps2	ENSMUSG00000060419	5	129633952	129634446
Gm17060	ENSMUSG00000090624	6	49374060	49374883
5430402O13Rik	ENSMUSG00000085776	6	50516642	50544864
Tmem176b	ENSMUSG00000029810	6	48783810	48791373
Tmem176a	ENSMUSG00000023367	6	48791482	48795363
Gm7932	ENSMUSG00000073090	6	48810355	48814296
Abp1	ENSMUSG00000029811	6	48845253	48859187
1600015I10Rik	ENSMUSG00000029813	6	48879894	48883686
Gm10242	ENSMUSG00000068537	6	48889788	48890126
Doxl2	ENSMUSG00000068536	6	48925073	48928744
Svs1	ENSMUSG00000039215	6	48936860	48941724
Gpnmb	ENSMUSG00000029816	6	48986517	49020928
2410003K15Rik	ENSMUSG00000029815	6	49023794	49036750
Igf2bp3	ENSMUSG00000029814	6	49035220	49164953
Tra2a	ENSMUSG00000029817	6	49193920	49214051
Ccdc126	ENSMUSG00000050786	6	49269273	49291581
D330028D13Rik	ENSMUSG00000047115	6	49317738	49339904
Stk31	ENSMUSG00000023403	6	49345603	49419500
Npy	ENSMUSG00000029819	6	49772709	49779506
Mpp6	ENSMUSG00000038388	6	50060240	50148597
Dfna5	ENSMUSG00000029821	6	50139368	50213861
Osbpl3	ENSMUSG00000029822	6	50243326	50406200
Cycs	ENSMUSG00000063694	6	50512562	50516537
4921507P07Rik	ENSMUSG00000029828	6	50523301	50546631
Gm4782	ENSMUSG00000092012	6	50558636	50560708
Gm8038	ENSMUSG00000091981	6	50569821	50571884
Npvf	ENSMUSG00000029831	6	50600671	50604438
SNORA17	ENSMUSG00000077357	6	50489903	50490033
SNORA17	ENSMUSG00000089335	6	48884793	48884922
AC158667.1	ENSMUSG00000093275	6	49120060	49120303
G930045G22Rik	ENSMUSG00000073072	6	50796523	50828078
Mir148a	ENSMUSG00000065505	6	51219811	51219909
5530400C23Rik	ENSMUSG00000055594	6	133242234	133245808
Kap	ENSMUSG00000032758	6	133799873	133803685
Etv6	ENSMUSG00000030199	6	133985718	134220176
Bcl2l14	ENSMUSG00000030200	6	134346336	134388754
Lrp6	ENSMUSG00000030201	6	134396494	134516983
Mansc1	ENSMUSG00000032718	6	134559228	134582506
Loh12cr1	ENSMUSG00000042992	6	134589645	134661202
Dusp16	ENSMUSG00000030203	6	134665488	134742643
Crebl2	ENSMUSG00000032652	6	134780172	134808949
Gpr19	ENSMUSG00000032641	6	134819111	134847943
Cdkn1b	ENSMUSG00000003031	6	134870419	134875531
Apold1	ENSMUSG00000090698	6	134932019	134936854
Ddx47	ENSMUSG00000030204	6	134961630	134973794
Gprc5a	ENSMUSG00000046733	6	135015669	135034727
Gprc5d	ENSMUSG00000030205	6	135056009	135068301
Hebp1	ENSMUSG00000042770	6	135087537	135118233
Gm17088	ENSMUSG00000091438	6	134118897	134122025
Gm17089	ENSMUSG00000092134	6	134183176	134193729
AC122359.1	ENSMUSG00000093148	6	133711706	133711788
SNORA17	ENSMUSG00000088372	6	135098666	135098799
AC122520.2	ENSMUSG00000077115	6	133146658	133146767
AC122520.1	ENSMUSG00000077093	6	133141810	133141919
Vmn2r46	ENSMUSG00000090342	7	10339985	10355920
Vmn2r47	ENSMUSG00000091545	7	10402131	10426674
Vmn2r48	ENSMUSG00000091544	7	10503601	10538934
Vmn2r49	ENSMUSG00000078802	7	10561594	10577488
Vmn2r50	ENSMUSG00000061026	7	10622584	10638527
Vmn2r51	ENSMUSG00000058685	7	10672547	10691008
Vmn2r52	ENSMUSG00000091930	7	10744001	10761635
Vmn1r66	ENSMUSG00000043066	7	10859177	10860700
Nlrp4d	ENSMUSG00000034122	7	10944250	10974284
Vmn1r67	ENSMUSG00000046716	7	11032138	11033136
Zik1	ENSMUSG00000030393	7	11072578	11080743
Vmn1r68	ENSMUSG00000047031	7	11112559	11113518
Vmn1r69	ENSMUSG00000091662	7	11165105	11198925
Vmn1r70	ENSMUSG00000045340	7	11218936	11219832
Gm6900	ENSMUSG00000091026	7	11241631	11242323
Nlrp4b	ENSMUSG00000034087	7	11273142	11315517
Vmn1r71	ENSMUSG00000059206	7	11332851	11334887
Zscan4b	ENSMUSG00000091643	7	11486098	11490399
Gm10991	ENSMUSG00000078801	7	11494168	11494649
Vmn1r-ps52	ENSMUSG00000093689	7	11252115	11252976
Vmn2r-ps51	ENSMUSG00000093478	7	10471627	10485092
Vmn2r-ps52	ENSMUSG00000093681	7	10503601	10504212
RP24-347O5.6	ENSMUSG00000093766	7	10779810	10791026
Vmn1r-ps47	ENSMUSG00000093781	7	10866146	10867052
Vmn1r-ps48	ENSMUSG00000093487	7	10885834	10886729
Vmn1r-ps49	ENSMUSG00000093595	7	11134906	11135784
Vmn1r-ps50	ENSMUSG00000093418	7	11190114	11190487
Vmn1r-ps51	ENSMUSG00000093534	7	11235648	11235967
Vmn1r-ps53	ENSMUSG00000092489	7	12238479	12239400
Zscan4c	ENSMUSG00000054272	7	11591071	11595896
Zscan4d	ENSMUSG00000090714	7	11746992	11751497
Zscan4e	ENSMUSG00000091880	7	11891727	11896031
Zscan4f	ENSMUSG00000070828	7	11983264	11988090
Zscan4-ps2	ENSMUSG00000070826	7	12099659	12104460
Vmn1r72	ENSMUSG00000070824	7	12254948	12255868
AC155315.1	ENSMUSG00000076988	7	11935799	11935874
AC151974.1	ENSMUSG00000080350	7	11888567	11888687
Mir297-1	ENSMUSG00000076224	7	11543786	11543861
Vmn1r-ps54	ENSMUSG00000092631	7	12367438	12367615
Vmn1r73	ENSMUSG00000051687	7	12341606	12342517
Dll3	ENSMUSG00000003436	7	29076673	29087257
BC089491	ENSMUSG00000046750	7	29069671	29076205
Ttc9b	ENSMUSG00000007944	7	28438934	28441227
Sertad1	ENSMUSG00000008384	7	28271929	28275335
Sertad3	ENSMUSG00000055200	7	28258787	28262378
Gm17248	ENSMUSG00000090904	7	28712743	28716022
Timm50	ENSMUSG00000003438	7	29090535	29097091
Supt5h	ENSMUSG00000003435	7	29099917	29123738
Map3k10	ENSMUSG00000040390	7	28441394	28459617
C030039L03Rik	ENSMUSG00000057093	7	28474359	28491503
Zfp60	ENSMUSG00000037640	7	28516408	28538721
Zfp626	ENSMUSG00000030604	7	28592223	28603811
Zfp59	ENSMUSG00000078779	7	28627874	28641995
Zfp607	ENSMUSG00000020420	7	28647576	28664586
1700049G17Rik	ENSMUSG00000070709	7	28692411	28714479
Zfp780b	ENSMUSG00000063047	7	28747727	28759804
Zfp850	ENSMUSG00000074608	7	28769875	28770815
Psmc4	ENSMUSG00000030603	7	28826726	28835120
Fcgbp	ENSMUSG00000047730	7	28856255	28905881
Gm10935	ENSMUSG00000078384	7	28884679	28887506
Nlrp9c	ENSMUSG00000040614	7	27107492	27188719
Gm15883	ENSMUSG00000086868	7	27909500	27915693
Gm15567	ENSMUSG00000084974	7	28034282	28042951
Gm15570	ENSMUSG00000083622	7	28056787	28057411
Pgam1-ps2	ENSMUSG00000082016	7	28254790	28255554
Gm15541	ENSMUSG00000087371	7	28287737	28293141
Gm10651	ENSMUSG00000074243	7	28734174	28734782
Shkbp1	ENSMUSG00000089832	7	28127152	28141038
Gm20479	ENSMUSG00000092367	7	28137668	28142438
Spnb4	ENSMUSG00000011751	7	28141402	28232705
Blvrb	ENSMUSG00000040466	7	28232997	28251163
Prx	ENSMUSG00000053198	7	28284343	28305233
Hipk4	ENSMUSG00000040424	7	28308280	28316194
Pld3	ENSMUSG00000003363	7	28317019	28338237
2310022A10Rik	ENSMUSG00000049643	7	28338314	28367113
9530053A07Rik	ENSMUSG00000078776	7	28914485	28949830
Fbl	ENSMUSG00000046865	7	28954765	28964288
Dyrk1b	ENSMUSG00000002409	7	28964488	28972313
Eid2	ENSMUSG00000046058	7	29052900	29054184
Eid2b	ENSMUSG00000070705	7	29062725	29065148
Nlrp4a	ENSMUSG00000040601	7	27220132	27261161
Nlrp9a	ENSMUSG00000054102	7	27320042	27360634
Vmn1r185	ENSMUSG00000091924	7	27396040	27397183
Cyp2b23	ENSMUSG00000040650	7	27450246	27471456
Cyp2b19	ENSMUSG00000066704	7	27542182	27557649
Cyp2g1	ENSMUSG00000049685	7	27593946	27606216
Cyp2a5	ENSMUSG00000005547	7	27620324	27628567
Cyp2a22	ENSMUSG00000091867	7	27716650	27724405
Cyp2a12	ENSMUSG00000060407	7	27814109	27821826
Cyp2f2	ENSMUSG00000052974	7	27904928	27918679
Cyp2t4	ENSMUSG00000078787	7	27938733	27943687
Egln2	ENSMUSG00000058709	7	27943677	27951821
Rab4b	ENSMUSG00000053291	7	27953443	27963915
Mia1	ENSMUSG00000089661	7	27953449	27966176
Snrpa	ENSMUSG00000061479	7	27972024	27981290
BC024978	ENSMUSG00000078786	7	27980800	27990405
Itpkc	ENSMUSG00000003752	7	27992191	28013647
Adck4	ENSMUSG00000003762	7	28018042	28047271
Numbl	ENSMUSG00000063160	7	28043452	28067163
Ltbp4	ENSMUSG00000040488	7	28090155	28122711
Akt2	ENSMUSG00000004056	7	28376571	28425845
Mir1191	ENSMUSG00000080533	7	27990555	27990674
Mir3101	ENSMUSG00000093348	7	27961025	27961112
AC120367.1	ENSMUSG00000077509	7	27316203	27316312
U6	ENSMUSG00000064793	7	28908273	28908378
AC157561.1	ENSMUSG00000080562	7	28148333	28148420
Etv2	ENSMUSG00000006311	7	31418635	31421166
Lin37	ENSMUSG00000036845	7	31340460	31344857
Zfp84	ENSMUSG00000046185	7	30553571	30564840
Capn12	ENSMUSG00000054083	7	29666675	29678604
Tmem147	ENSMUSG00000006315	7	31512720	31514553
Gapdhs	ENSMUSG00000061099	7	31514799	31528700
Actn4	ENSMUSG00000054808	7	29678267	29747359
Eif3k	ENSMUSG00000053565	7	29756392	29766883
Map4k1	ENSMUSG00000037337	7	29767073	29788298
Ryr1	ENSMUSG00000030592	7	29788359	29910170
Gm10988	ENSMUSG00000078767	7	30936893	30937764
Rps12-ps5	ENSMUSG00000081565	7	31048282	31048670
Nphs1as	ENSMUSG00000087009	7	31247183	31250610
Gm1082	ENSMUSG00000062132	7	31300141	31307212
Gm17104	ENSMUSG00000091271	7	31349756	31350375
Ech1	ENSMUSG00000053898	7	29610236	29617266
Lgals4	ENSMUSG00000053964	7	29618813	29626722
Catsperg1	ENSMUSG00000049676	7	29966340	29999054
Rasgrp4	ENSMUSG00000030589	7	29919873	29938980
Fam98c	ENSMUSG00000030590	7	29937530	29941253
Spred3	ENSMUSG00000037239	7	29943848	29954860
Ggn	ENSMUSG00000031493	7	29955239	29958952
Psmd8	ENSMUSG00000030591	7	29959207	29965692
Nphs1	ENSMUSG00000006649	7	31243334	31272242
Kcnk6	ENSMUSG00000046410	7	30006947	30017541
Yif1b	ENSMUSG00000030588	7	30023348	30032612
2200002D01Rik	ENSMUSG00000030587	7	30031580	30033451
Spint2	ENSMUSG00000074227	7	30041350	30066996
Ppp1r14a	ENSMUSG00000037166	7	30074339	30078409
Dpf1	ENSMUSG00000030584	7	30088970	30102607
Sipa1l3	ENSMUSG00000030583	7	30105397	30290479
4932431P20Rik	ENSMUSG00000074224	7	30304224	30323076
4930432E11Rik	ENSMUSG00000046958	7	30345534	30360497
6330444E15Rik	ENSMUSG00000051976	7	30363894	30364853
Catsperg2	ENSMUSG00000049123	7	30482238	30512051
Nfkbib	ENSMUSG00000030595	7	29543270	29552531
Psenen	ENSMUSG00000036835	7	31346887	31348203
U2af1l4	ENSMUSG00000078765	7	31348320	31352979
Lgals7	ENSMUSG00000053522	7	29648872	29651303
4930479M11Rik	ENSMUSG00000049761	7	31455741	31456610
2200002J24Rik	ENSMUSG00000013083	7	31484802	31485399
Gm4883	ENSMUSG00000066620	7	31494755	31495282
Atp4a	ENSMUSG00000005553	7	31497228	31510554
Gm16282	ENSMUSG00000090009	7	29923459	29925331
1110035H17Rik	ENSMUSG00000050633	7	29940699	29941937
Gm17113	ENSMUSG00000061115	7	29968055	29968402
Gm17199	ENSMUSG00000090331	7	30640659	30641074
Gm10169	ENSMUSG00000083669	7	30750237	30750584
Sirt2	ENSMUSG00000015149	7	29551754	29573684
Gm16799	ENSMUSG00000087096	7	29856622	29866153
Gm17551	ENSMUSG00000092015	7	30638104	30644044
Gm17440	ENSMUSG00000092079	7	30983649	30985908
Gm17478	ENSMUSG00000087359	7	31435404	31437730
Sbsn	ENSMUSG00000046056	7	31536490	31541152
Dmkn	ENSMUSG00000060962	7	31548775	31566085
Rinl	ENSMUSG00000051735	7	29573988	29583982
Hnrnpl	ENSMUSG00000015165	7	29593560	29607285
Kirrel2	ENSMUSG00000036915	7	31232553	31242709
Cox6b1	ENSMUSG00000036751	7	31401993	31411170
Zbtb32	ENSMUSG00000006310	7	31374700	31383928
Upk1a	ENSMUSG00000006313	7	31388111	31397753
BC053749	ENSMUSG00000036864	7	31324153	31337315
Hspb6	ENSMUSG00000036854	7	31337197	31340462
Zfp30	ENSMUSG00000047473	7	30569017	30579721
Zfp790	ENSMUSG00000011427	7	30601091	30617061
Zfp940	ENSMUSG00000050855	7	30618639	30638688
Zfp420	ENSMUSG00000058402	7	30644998	30700678
Zfp27	ENSMUSG00000062040	7	30678352	30691591
Zfp74	ENSMUSG00000059975	7	30715834	30739108
C230062I16Rik	ENSMUSG00000063623	7	30738640	30741011
Zfp568	ENSMUSG00000074221	7	30768974	30813301
Zfp14	ENSMUSG00000053985	7	30823072	30829753
Gm10989	ENSMUSG00000078770	7	30839755	30840586
Zfp82	ENSMUSG00000058447	7	30841057	30857842
Zfp566	ENSMUSG00000078768	7	30862356	30875529
Zfp260	ENSMUSG00000049421	7	30879796	30892641
Zfp382	ENSMUSG00000074220	7	30906961	30919684
Zfp146	ENSMUSG00000037029	7	30946293	30954746
Gm5113	ENSMUSG00000066647	7	30954894	30965228
Cox7a1	ENSMUSG00000074218	7	30969190	30971047
Capns1	ENSMUSG00000001794	7	30971961	30980183
Tbcb	ENSMUSG00000006095	7	31009150	31017291
Polr2i	ENSMUSG00000019738	7	31016967	31018409
Ovol3	ENSMUSG00000056028	7	31018512	31020744
Wdr62	ENSMUSG00000037020	7	31025157	31065438
Arhgap33	ENSMUSG00000036882	7	31307245	31320079
Rbm42	ENSMUSG00000036733	7	31426013	31435336
Haus5	ENSMUSG00000078762	7	31426020	31450013
Thap8	ENSMUSG00000013928	7	31065113	31075256
Clip3	ENSMUSG00000013921	7	31076691	31093386
Alkbh6	ENSMUSG00000042831	7	31093736	31099323
AI428936	ENSMUSG00000019737	7	31099826	31104065
Sdhaf1	ENSMUSG00000074211	7	31106430	31107394
E130208F15Rik	ENSMUSG00000074210	7	31106759	31108491
Lrfn3	ENSMUSG00000036957	7	31140533	31147791
Tyrobp	ENSMUSG00000030579	7	31198807	31202596
Hcst	ENSMUSG00000064109	7	31202732	31204873
Nfkbid	ENSMUSG00000036931	7	31206751	31213765
Aplp1	ENSMUSG00000006651	7	31220001	31230580
Tmem149	ENSMUSG00000036826	7	31350446	31352981
Wbp7	ENSMUSG00000006307	7	31353877	31373745
Prodh2	ENSMUSG00000036892	7	31278641	31298421
Mir1963	ENSMUSG00000089219	7	29868655	29868713
AC149067.1	ENSMUSG00000093571	7	31096544	31096914
U6	ENSMUSG00000065659	7	30522337	30522443
U2	ENSMUSG00000064982	7	31141751	31141943
Mir1964	ENSMUSG00000089139	7	30558313	30558395
n-R5s153	ENSMUSG00000065385	7	30442180	30442295
AC164703.1	ENSMUSG00000093495	7	30885859	30885954
Krtdap	ENSMUSG00000074199	7	31572924	31576102
Ffar2	ENSMUSG00000051314	7	31603376	31608794
Ffar3	ENSMUSG00000019429	7	31639349	31641197
Ffar1	ENSMUSG00000044453	7	31645587	31646489
Cd22	ENSMUSG00000030577	7	31650421	31665361
Mag	ENSMUSG00000036634	7	31684202	31699851
Gm17077	ENSMUSG00000090357	7	31740844	31743023
Gm4673	ENSMUSG00000091324	7	31742428	31746638
Hamp2	ENSMUSG00000056978	7	31707391	31709200
Hamp	ENSMUSG00000050440	7	31727390	31729036
Usf2	ENSMUSG00000058239	7	31730271	31741822
Lsr	ENSMUSG00000001247	7	31742428	31768188
Fam187b	ENSMUSG00000046826	7	31758823	31774739
Fxyd7	ENSMUSG00000036578	7	31827536	31836481
G630030J09Rik	ENSMUSG00000085458	7	31934547	31937726
Scn1b	ENSMUSG00000019194	7	31901544	31911964
Gramd1a	ENSMUSG00000001248	7	31915146	31936069
Abph	ENSMUSG00000062556	7	32075539	32076835
Abpe	ENSMUSG00000036521	7	32087780	32089996
Gm4362	ENSMUSG00000078754	7	32144057	32147091
Gm4684	ENSMUSG00000078758	7	32488798	32490776
Gm6662	ENSMUSG00000078759	7	32497684	32498997
Gm6666	ENSMUSG00000078383	7	32551971	32552438
Gm6669	ENSMUSG00000090339	7	32602129	32603133
Gm5329	ENSMUSG00000078381	7	32757121	32757588
Fxyd1	ENSMUSG00000036570	7	31836700	31840675
Lgi4	ENSMUSG00000036560	7	31844361	31855954
Fxyd3	ENSMUSG00000057092	7	31853191	31861723
Hpn	ENSMUSG00000001249	7	31883744	31900309
Fxyd5	ENSMUSG00000009687	7	31817741	31827500
Rgs9bp	ENSMUSG00000056043	7	36364017	36370601
Gm16929	ENSMUSG00000084801	7	36557397	36564187
Gm17327	ENSMUSG00000090311	7	35009774	35015255
Pdcd2l	ENSMUSG00000002635	7	34969518	34981680
Gpi1	ENSMUSG00000036427	7	34987141	35015308
4931406P16Rik	ENSMUSG00000066571	7	35021726	35098570
Gm6096	ENSMUSG00000078380	7	35036057	35036512
Lsm14a	ENSMUSG00000066568	7	35129665	35174559
Kctd15	ENSMUSG00000030499	7	35424033	35440528
Chst8	ENSMUSG00000060402	7	35459487	35597730
Pepd	ENSMUSG00000063931	7	35697398	35829729
Cebpg	ENSMUSG00000056216	7	35831441	35841522
Cebpa	ENSMUSG00000034957	7	35904312	35906945
Slc7a10	ENSMUSG00000030495	7	35971404	35989917
Lrp3	ENSMUSG00000001802	7	35984852	36000389
Gpatch1	ENSMUSG00000063808	7	36061555	36103459
Rhpn2	ENSMUSG00000030494	7	36119194	36177304
C230052I12Rik	ENSMUSG00000030493	7	36177294	36181836
Gm12765	ENSMUSG00000083085	7	34722280	34723256
Gm12759	ENSMUSG00000083942	7	34743824	34745005
Gm12773	ENSMUSG00000081962	7	34782018	34782604
Gm12755	ENSMUSG00000081768	7	34783031	34791480
Gm12760	ENSMUSG00000083434	7	34821466	34822451
Gm12779	ENSMUSG00000080947	7	34853574	34853765
Gm12778	ENSMUSG00000081491	7	34960731	34961063
Gm12783	ENSMUSG00000081161	7	34961777	34965023
Gm12762	ENSMUSG00000086526	7	35015439	35019094
Gm12758	ENSMUSG00000085105	7	35019396	35025226
Gm12774	ENSMUSG00000082684	7	35168678	35169093
Gm12764	ENSMUSG00000086184	7	35173684	35179798
Gm12766	ENSMUSG00000085124	7	35223156	35305904
Gm12780	ENSMUSG00000081863	7	35280440	35281084
Gm12784	ENSMUSG00000086631	7	35332225	35341223
Gm12781	ENSMUSG00000085923	7	35438203	35445435
Gm12756	ENSMUSG00000087127	7	35450432	35459018
Ccdc123	ENSMUSG00000023072	7	36182054	36223708
Abpg	ENSMUSG00000066586	7	34728021	34730059
Abpb	ENSMUSG00000066584	7	34796951	34798961
Abpa	ENSMUSG00000066583	7	34806502	34807900
Gm12776	ENSMUSG00000078752	7	34880450	34885856
Wtip	ENSMUSG00000036459	7	34894562	34918287
Uba2	ENSMUSG00000052997	7	34925708	34954618
Pdcd5	ENSMUSG00000030417	7	36427001	36432540
Dpy19l3	ENSMUSG00000043671	7	36470184	36539473
Zfp507	ENSMUSG00000044452	7	36557365	36588008
E130304I02Rik	ENSMUSG00000044997	7	36587612	36588046
Ankrd27	ENSMUSG00000034867	7	36371266	36424256
Slc7a9	ENSMUSG00000030492	7	36234056	36251055
Tdrd12	ENSMUSG00000030491	7	36254117	36322764
Nudt19	ENSMUSG00000034875	7	36332204	36341323
SNORA17	ENSMUSG00000077469	7	35728875	35729004
5S_rRNA	ENSMUSG00000088799	7	35886841	35886959
AC150683.1	ENSMUSG00000093715	7	36019779	36019847
AC149058.1	ENSMUSG00000093153	7	35866929	35866998
SNORA17	ENSMUSG00000088307	7	36002254	36002379
Gm10166	ENSMUSG00000066543	7	36903274	36903877
A730056A06Rik	ENSMUSG00000092033	7	80458889	80520625
Gm4971	ENSMUSG00000091647	7	80830418	80831467
Gm7580	ENSMUSG00000085161	7	81537584	81556119
Rgma	ENSMUSG00000070509	7	80520406	80564785
Chd2	ENSMUSG00000078671	7	80571577	80686632
A830073O21Rik	ENSMUSG00000091890	7	80883779	80885803
Fam174b	ENSMUSG00000078670	7	80885193	80921805
Gm10619	ENSMUSG00000074067	7	80953108	80961389
St8sia2	ENSMUSG00000025789	7	81084005	81158568
Slco3a1	ENSMUSG00000025790	7	81420305	81699666
7SK	ENSMUSG00000089391	7	80806934	80807186
snoU109	ENSMUSG00000089573	7	81134982	81135120
U6	ENSMUSG00000065729	7	80790871	80790975
1500012K07Rik	ENSMUSG00000086403	7	82453588	82476305
Sv2b	ENSMUSG00000053025	7	82259783	82454148
7SK	ENSMUSG00000088683	7	82419975	82420297
7SK	ENSMUSG00000089522	7	82107233	82107583
Akap13	ENSMUSG00000066406	7	82600420	82899495
U6	ENSMUSG00000087896	7	82813759	82813842
AC158749.1	ENSMUSG00000076961	7	82902145	82902254
Klhl25	ENSMUSG00000055652	7	82993224	83019016
Agbl1	ENSMUSG00000025754	7	83462958	83911494
Pak1	ENSMUSG00000030774	7	104937051	105060891
Gdpd4	ENSMUSG00000035582	7	105068465	105198173
Myo7a	ENSMUSG00000030761	7	105199570	105268034
Capn5	ENSMUSG00000035547	7	105270069	105326784
Omp	ENSMUSG00000074006	7	105291870	105294012
B3gnt6	ENSMUSG00000074004	7	105340930	105347991
Acer3	ENSMUSG00000030760	7	105362168	105469718
Tsku	ENSMUSG00000049580	7	105499178	105509838
Gucy2d	ENSMUSG00000074003	7	105591931	105625802
Lrrc32	ENSMUSG00000090958	7	105642732	105650341
A630091E08Rik	ENSMUSG00000055446	7	105691888	105711498
2210018M11Rik	ENSMUSG00000035401	7	105739125	105805079
Prkrir	ENSMUSG00000030753	7	105851613	105866572
Wnt11	ENSMUSG00000015957	7	105983622	106003705
Uvrag	ENSMUSG00000035354	7	106035253	106289654
Dgat2	ENSMUSG00000030747	7	106302173	106331223
Mogat2	ENSMUSG00000052396	7	106367594	106387129
Mtap6	ENSMUSG00000055407	7	106415957	106485647
Serpinh1	ENSMUSG00000070436	7	106493885	106501740
Gdpd5	ENSMUSG00000035314	7	106530059	106609493
Klhl35	ENSMUSG00000035298	7	106614514	106622532
Rps3	ENSMUSG00000030744	7	106626406	106632248
Arrb1	ENSMUSG00000018909	7	106683976	106755281
Gm4980	ENSMUSG00000060814	7	106774004	106774684
Slco2b1	ENSMUSG00000030737	7	106806314	106859850
Olfr520	ENSMUSG00000073998	7	106883655	106884605
Gm16938	ENSMUSG00000086325	7	105325704	105334107
Gm16890	ENSMUSG00000084975	7	106408992	106415728
Gm15506	ENSMUSG00000086477	7	105830846	105851438
Gm8398	ENSMUSG00000091496	7	106003242	106003605
Gm15635	ENSMUSG00000085095	7	106809949	106815904
Mir326	ENSMUSG00000065571	7	106700779	106700873
SNORA41	ENSMUSG00000065698	7	106802198	106802328
n-R5s156	ENSMUSG00000065311	7	106646228	106646332
Snord15a	ENSMUSG00000065822	7	106631295	106631442
Snord15b	ENSMUSG00000064966	7	106628073	106628217
U1	ENSMUSG00000065803	7	105655464	105655626
SNORA17	ENSMUSG00000089501	7	106084404	106084525
Zfp423	ENSMUSG00000045333	8	90185709	90483494
Tmem188	ENSMUSG00000036810	8	90642668	90659009
Heatr3	ENSMUSG00000031657	8	90661754	90695926
9430002A10Rik	ENSMUSG00000062704	8	90698459	90698927
Papd5	ENSMUSG00000036779	8	90723112	90783621
Adcy7	ENSMUSG00000031659	8	90796302	90853861
Brd7	ENSMUSG00000031660	8	90854938	90886093
Nkd1	ENSMUSG00000031661	8	91045243	91118786
Snx20	ENSMUSG00000031662	8	91150727	91160027
Nod2	ENSMUSG00000055994	8	91171214	91212373
Cyld	ENSMUSG00000036712	8	91220927	91275844
Rps6-ps2	ENSMUSG00000056772	8	91330290	91331039
Sall1	ENSMUSG00000031665	8	91551147	91568061
Gm5356	ENSMUSG00000069962	8	91710842	91711459
Gm2716	ENSMUSG00000086208	8	90568797	90642506
Gm9988	ENSMUSG00000055968	8	90661978	90662416
U6	ENSMUSG00000064758	8	92113334	92113440
7SK	ENSMUSG00000089301	8	90160556	90160912
Gpr97	ENSMUSG00000060470	8	97541592	97569147
Ccdc135	ENSMUSG00000031786	8	97579003	97602041
Katnb1	ENSMUSG00000031787	8	97605101	97623774
Kifc3	ENSMUSG00000031788	8	97623732	97666440
Cngb1	ENSMUSG00000031789	8	97762945	97808081
BC016201	ENSMUSG00000058253	8	97814493	97830485
Tepp	ENSMUSG00000090206	8	97834466	97850223
Zfp319	ENSMUSG00000074140	8	97846914	97849163
Zfp319	ENSMUSG00000046556	8	97850037	97855850
AA960436	ENSMUSG00000031792	8	97856192	97871407
Mmp15	ENSMUSG00000031790	8	97876168	97898193
Gtl3	ENSMUSG00000031796	8	97944152	97958769
Csnk2a2	ENSMUSG00000046707	8	97969996	98012727
Ccdc113	ENSMUSG00000036598	8	98058000	98082788
Prss54	ENSMUSG00000048400	8	98083033	98099355
Gins3	ENSMUSG00000031669	8	98157459	98168959
Ndrg4	ENSMUSG00000036564	8	98200880	98239019
Setd6	ENSMUSG00000031671	8	98239815	98242910
Cnot1	ENSMUSG00000036550	8	98243351	98331366
Gm10094	ENSMUSG00000061104	8	98349254	98350033
Slc38a7	ENSMUSG00000036534	8	98359820	98377439
Got2	ENSMUSG00000031672	8	98388034	98412447
1700047G07Rik	ENSMUSG00000053206	8	99036240	99037431
Gm5912	ENSMUSG00000081436	8	98101371	98102808
4930513N10Rik	ENSMUSG00000074136	8	98330730	98345628
SNORA46	ENSMUSG00000065089	8	98269960	98270095
SNORA76	ENSMUSG00000065211	8	98280850	98280984
AC128668.1	ENSMUSG00000077938	8	99180029	99180119
SNORA17	ENSMUSG00000077272	8	98842387	98842518
Mir1186b	ENSMUSG00000093084	8	98487444	98487507
Gm5913	ENSMUSG00000081111	8	99951130	99953079
U6	ENSMUSG00000089539	8	99746434	99746535
AC164603.1	ENSMUSG00000077125	8	99779741	99779850
Rora	ENSMUSG00000032238	9	68501593	69236053
Narg2	ENSMUSG00000032235	9	69245713	69280929
Gm4978	ENSMUSG00000062874	9	69298039	69298854
Anxa2	ENSMUSG00000032231	9	69301427	69339602
Foxb1	ENSMUSG00000059246	9	69605517	69608747
Bnip2	ENSMUSG00000011958	9	69837273	69856124
Gtf2a2	ENSMUSG00000033543	9	69860357	69870673
Gcnt3	ENSMUSG00000032226	9	69879303	69885895
Fam81a	ENSMUSG00000032224	9	69937117	69990367
Myo1e	ENSMUSG00000032220	9	70055157	70247874
F830001A07Rik	ENSMUSG00000066690	9	68683148	68683583
Gm15511	ENSMUSG00000086648	9	69196696	69212054
Gm16144	ENSMUSG00000086399	9	69324836	69327405
B230323A14Rik	ENSMUSG00000087375	9	69606547	69678652
Gm17406	ENSMUSG00000091654	9	70017793	70045355
Mir3109	ENSMUSG00000093042	9	69304751	69304838
SNORA17	ENSMUSG00000077660	9	69996613	69996743
SNORD113	ENSMUSG00000088587	9	68357970	68358042
U6	ENSMUSG00000065163	9	68309146	68309252
Ccnb2	ENSMUSG00000032218	9	70255496	70269361
Rnf111	ENSMUSG00000032217	9	70273236	70351532
AC157086.1	ENSMUSG00000093763	9	70253501	70253560
Gm16202	ENSMUSG00000083731	9	86209748	86210291
Gm11114	ENSMUSG00000079433	9	85206380	85206467
Fam46a	ENSMUSG00000032265	9	85214046	85220731
Ibtk	ENSMUSG00000035941	9	85580963	85642830
Gm5619	ENSMUSG00000062358	9	85675425	85676279
9330154J02Rik	ENSMUSG00000056031	9	85713848	85736892
Tpbg	ENSMUSG00000035274	9	85735987	85740662
Ube2cbp	ENSMUSG00000032415	9	86200841	86358557
Dopey1	ENSMUSG00000034973	9	86360761	86449413
Gm17530	ENSMUSG00000092099	9	86440289	86440402
Pgm3	ENSMUSG00000056131	9	86446083	86465449
Rwdd2a	ENSMUSG00000032417	9	86465660	86468503
Me1	ENSMUSG00000032418	9	86474970	86589947
A330041J22Rik	ENSMUSG00000087466	9	86589575	86593867
Prss35	ENSMUSG00000033491	9	86636434	86650680
Snap91	ENSMUSG00000033419	9	86659981	86775489
SNORA42	ENSMUSG00000065274	9	85366341	85366476
SNORA17	ENSMUSG00000089373	9	86597857	86597984
CAAA01037531.1.36077.1	ENSMUSG00000093074	9	86593076	86593189
SNORA61	ENSMUSG00000065706	9	85665958	85666087
Gal3st1	ENSMUSG00000049721	11	3883639	3899329
Sec14l4	ENSMUSG00000019368	11	3931465	3948027
Sec14l3	ENSMUSG00000054986	11	3964844	3977739
Mtfp1	ENSMUSG00000004748	11	3991483	3995448
Sec14l2	ENSMUSG00000003585	11	3997042	4023418
Rnf215	ENSMUSG00000003581	11	4035205	4041175
Ccdc157	ENSMUSG00000051427	11	4041126	4060296
Sf3a1	ENSMUSG00000002129	11	4060353	4082544
Tbc1d10a	ENSMUSG00000034412	11	4086792	4115508
Gatsl3	ENSMUSG00000020424	11	4118228	4122412
Osm	ENSMUSG00000058755	11	4136423	4141029
Lif	ENSMUSG00000034394	11	4157560	4172517
Hormad2	ENSMUSG00000020419	11	4245817	4341108
Mtmr3	ENSMUSG00000034354	11	4380871	4494866
Gm11032	ENSMUSG00000079010	11	4520070	4521701
Ascc2	ENSMUSG00000020412	11	4537750	4585702
Uqcr10	ENSMUSG00000059534	11	4601976	4604345
Zmat5	ENSMUSG00000009076	11	4604681	4637672
Cabp7	ENSMUSG00000009075	11	4636895	4646781
Nf2	ENSMUSG00000009073	11	4665848	4749539
Nipsnap1	ENSMUSG00000034285	11	4773954	4794203
Thoc5	ENSMUSG00000034274	11	4795323	4828870
Nefh	ENSMUSG00000020396	11	4838757	4848067
Ap1b1	ENSMUSG00000009090	11	4886827	4942732
Gas2l1	ENSMUSG00000034201	11	4954135	4965330
Rasl10a	ENSMUSG00000034209	11	4958131	4960388
Ewsr1	ENSMUSG00000009079	11	4969692	4999269
Rhbdd3	ENSMUSG00000034175	11	4998929	5006096
Gm11031	ENSMUSG00000079004	11	4999387	4999881
Emid1	ENSMUSG00000034164	11	5006268	5052260
Kremen1	ENSMUSG00000020393	11	5091555	5161561
Znrf3	ENSMUSG00000041961	11	5176327	5344850
Xbp1	ENSMUSG00000020484	11	5420662	5425896
Ccdc117	ENSMUSG00000020482	11	5428890	5442190
Ankrd36	ENSMUSG00000020481	11	5469687	5589340
Mrps24	ENSMUSG00000020477	11	5603986	5615683
Urgcp	ENSMUSG00000049680	11	5613420	5662379
Dbnl	ENSMUSG00000020476	11	5688491	5700965
Pgam2	ENSMUSG00000020475	11	5701643	5703736
Polm	ENSMUSG00000020474	11	5727863	5738019
Aebp1	ENSMUSG00000020473	11	5761950	5772091
Pold2	ENSMUSG00000020471	11	5772183	5778295
Myl7	ENSMUSG00000020469	11	5796640	5798785
Gck	ENSMUSG00000041798	11	5800823	5850084
Gm11953	ENSMUSG00000082816	11	3851717	3852719
Gm11954	ENSMUSG00000084170	11	3902460	3902808
Gm11955	ENSMUSG00000082364	11	4007758	4008227
Gm11957	ENSMUSG00000083838	11	4029375	4030153
Gm11956	ENSMUSG00000084012	11	4130757	4131268
Gm11959	ENSMUSG00000085559	11	4174092	4181934
Gm11958	ENSMUSG00000085512	11	4185463	4186942
Gm11960	ENSMUSG00000081974	11	4463655	4464559
Gm11961	ENSMUSG00000056288	11	4520278	4530014
AA413626	ENSMUSG00000084381	11	4818513	4819006
Gm11962	ENSMUSG00000085232	11	5395195	5395449
Gm11963	ENSMUSG00000085189	11	5398843	5405702
Gm11964	ENSMUSG00000081021	11	5534142	5534585
Gm11965	ENSMUSG00000081691	11	5578359	5578635
2210015D19Rik	ENSMUSG00000083844	11	5662132	5684713
Gm11966	ENSMUSG00000080904	11	5718500	5718586
Gm11967	ENSMUSG00000084819	11	5815318	5816734
Tcn2	ENSMUSG00000020432	11	3817195	3832162
4930556J24Rik	ENSMUSG00000034493	11	3837544	3876781
Pes1	ENSMUSG00000020430	11	3863978	3880007
Mir3060	ENSMUSG00000093080	11	4039367	4039449
U6	ENSMUSG00000064632	11	5151853	5151959
SNORA17	ENSMUSG00000077304	11	5460609	5460738
U6	ENSMUSG00000065627	11	4224152	4224258
SNORD125	ENSMUSG00000088634	11	4938214	4938310
Vamp2	ENSMUSG00000020894	11	68901992	68905886
Per1	ENSMUSG00000020893	11	68908719	68923462
Hes7	ENSMUSG00000023781	11	68933906	68937557
Aloxe3	ENSMUSG00000020892	11	68939398	68962617
Alox12b	ENSMUSG00000032807	11	68970491	68983294
Alox8	ENSMUSG00000020891	11	68997434	69011345
Gucy2e	ENSMUSG00000020890	11	69031619	69050538
Cntrob	ENSMUSG00000032782	11	69112989	69137375
Trappc1	ENSMUSG00000049299	11	69137482	69139295
Kcnab3	ENSMUSG00000018470	11	69139760	69146544
Chd3	ENSMUSG00000018474	11	69156775	69182928
Gm17305	ENSMUSG00000091095	11	69177521	69182910
Cyb5d1	ENSMUSG00000044795	11	69205427	69209133
Lsmd1	ENSMUSG00000059278	11	69208989	69210182
Tmem88	ENSMUSG00000045377	11	69210021	69211736
Kdm6b	ENSMUSG00000018476	11	69212010	69227177
Dnahc2	ENSMUSG00000005237	11	69234311	69362612
Efnb3	ENSMUSG00000003934	11	69367594	69373707
Wrap53	ENSMUSG00000041346	11	69375260	69393757
Trp53	ENSMUSG00000059552	11	69393861	69405375
Gas7	ENSMUSG00000033066	11	67268939	67502492
Glp2r	ENSMUSG00000049928	11	67475004	67584655
Rcvrn	ENSMUSG00000020907	11	67508828	67516835
Dhrs7c	ENSMUSG00000033044	11	67611689	67629507
Usp43	ENSMUSG00000020905	11	67668025	67735655
Wdr16	ENSMUSG00000020904	11	67738308	67779153
Stx8	ENSMUSG00000020903	11	67779695	68020650
Ntn1	ENSMUSG00000020902	11	68022866	68214325
Pik3r5	ENSMUSG00000020901	11	68245623	68311351
Pik3r6	ENSMUSG00000046207	11	68316521	68366200
Mfsd6l	ENSMUSG00000048329	11	68369688	68371746
Ccdc42	ENSMUSG00000045915	11	68400523	68411468
Myh10	ENSMUSG00000020900	11	68505061	68630134
Ndel1	ENSMUSG00000018736	11	68634936	68685360
Rnf222	ENSMUSG00000046490	11	68702055	68709279
Rpl26	ENSMUSG00000060938	11	68715085	68720491
Odf4	ENSMUSG00000032921	11	68735337	68740583
Arhgef15	ENSMUSG00000052921	11	68756657	68770982
Slc25a35	ENSMUSG00000018740	11	68781633	68787867
Rangrf	ENSMUSG00000032892	11	68785986	68788687
Pfas	ENSMUSG00000020899	11	68799199	68824788
1500010J02Rik	ENSMUSG00000020898	11	68829413	68849975
Aurkb	ENSMUSG00000020897	11	68859149	68865166
9330160F10Rik	ENSMUSG00000072809	11	68871220	68873985
2310047M10Rik	ENSMUSG00000045176	11	68873277	68875078
Tmem107	ENSMUSG00000020895	11	68884308	68886795
Gm12302	ENSMUSG00000070402	11	67594445	67598816
9130017K11Rik	ENSMUSG00000055134	11	67735006	67761161
Gm12303	ENSMUSG00000082266	11	67848540	67849212
Gm12304	ENSMUSG00000083924	11	67909082	67909466
C78197	ENSMUSG00000087242	11	68005695	68009655
Gm12305	ENSMUSG00000084993	11	68083060	68084381
4930535C22Rik	ENSMUSG00000085937	11	68396766	68400459
Gm12306	ENSMUSG00000084069	11	68887992	68888162
1700067G03Rik	ENSMUSG00000087003	11	69107653	69108979
Gm16040	ENSMUSG00000086900	11	69143327	69145624
A030009H04Rik	ENSMUSG00000043419	11	69153963	69156143
1700064E03Rik	ENSMUSG00000085178	11	69215015	69216202
6030455H03Rik	ENSMUSG00000086591	11	69262050	69267178
9130213A22Rik	ENSMUSG00000090920	11	68933556	68936091
Mir3062	ENSMUSG00000092727	11	68804076	68804180
U6	ENSMUSG00000084522	11	68809504	68809587
U6	ENSMUSG00000088910	11	68721522	68721624
5S_rRNA	ENSMUSG00000089599	11	67866837	67866962
U6	ENSMUSG00000089438	11	69054101	69054205
AL662894.1	ENSMUSG00000093210	11	68141270	68141585
U6	ENSMUSG00000088787	11	68888517	68888617
SCARNA21	ENSMUSG00000087881	11	69164020	69164163
Snord118	ENSMUSG00000064899	11	68886929	68887063
Atp1b2	ENSMUSG00000041329	11	69413238	69419444
Shbg	ENSMUSG00000005202	11	69428306	69431407
Sat2	ENSMUSG00000069835	11	69435526	69437372
Fxr2	ENSMUSG00000018765	11	69446492	69466799
Sox15	ENSMUSG00000041287	11	69468816	69470229
Mpdu1	ENSMUSG00000018761	11	69470199	69476144
Cd68	ENSMUSG00000018774	11	69477715	69479655
Eif4a1	ENSMUSG00000059796	11	69480438	69485925
Senp3	ENSMUSG00000005204	11	69486612	69495586
BC096441	ENSMUSG00000018752	11	69496079	69509600
Tnfsf13	ENSMUSG00000089669	11	69496348	69499286
Polr2a	ENSMUSG00000005198	11	69547499	69572139
Amac1	ENSMUSG00000018776	11	69573392	69575470
Zbtb4	ENSMUSG00000018750	11	69579414	69597525
Chrnb1	ENSMUSG00000041189	11	69597538	69609445
Fgf11	ENSMUSG00000042826	11	69609570	69615359
Tmem102	ENSMUSG00000089876	11	69617105	69619126
4933402P03Rik	ENSMUSG00000044084	11	69630068	69631967
Spem1	ENSMUSG00000041165	11	69634378	69635682
Nlgn2	ENSMUSG00000051790	11	69636624	69651286
1810027O10Rik	ENSMUSG00000070394	11	69652016	69653120
Gm12308	ENSMUSG00000083485	11	69444426	69444814
Gm12309	ENSMUSG00000083300	11	69445024	69445205
2010012P19Rik	ENSMUSG00000085890	11	69495640	69504643
Gm12307	ENSMUSG00000081333	11	69543497	69544086
Mir1934	ENSMUSG00000088752	11	69476545	69476627
SNORA48	ENSMUSG00000084708	11	69483137	69483280
Mir467f	ENSMUSG00000080573	11	69448902	69449021
snoU6-77	ENSMUSG00000089542	11	69482354	69482497
SNORA67	ENSMUSG00000065862	11	69481336	69481478
Plscr3	ENSMUSG00000019461	11	69659878	69665560
4930595D18Rik	ENSMUSG00000083193	12	112398061	112422702
Traf3	ENSMUSG00000021277	12	112404581	112505364
Amn	ENSMUSG00000021278	12	112509322	112514637
Cdc42bpb	ENSMUSG00000021279	12	112531183	112615929
A230065H16Rik	ENSMUSG00000087075	12	112645020	112650288
1200009I06Rik	ENSMUSG00000021280	12	112655228	112669393
Tnfaip2	ENSMUSG00000021281	12	112680680	112693229
Gm266	ENSMUSG00000010529	12	112722822	112724034
Eif5	ENSMUSG00000021282	12	112776312	112794270
Mark3	ENSMUSG00000007411	12	112812721	112894438
Ckb	ENSMUSG00000001270	12	112907566	112910549
Trmt61a	ENSMUSG00000060950	12	112916316	112922113
Bag5	ENSMUSG00000049792	12	112947699	112951468
2810002N01Rik	ENSMUSG00000037787	12	112951472	112993191
Klc1	ENSMUSG00000021288	12	112997060	113046055
Xrcc3	ENSMUSG00000021287	12	113041403	113052084
Zfyve21	ENSMUSG00000021286	12	113052381	113066596
Ppp1r13b	ENSMUSG00000021285	12	113066668	113110826
2010107E04Rik	ENSMUSG00000021290	12	113199587	113205188
Tdrd9	ENSMUSG00000054003	12	113209770	113307065
BC048943	ENSMUSG00000091402	12	113217534	113218962
Aspg	ENSMUSG00000037686	12	113344894	113365784
Kif26a	ENSMUSG00000021294	12	113384446	113419957
A730018C14Rik	ENSMUSG00000047828	12	113652126	113661423
A530016L24Rik	ENSMUSG00000043122	12	113727659	113738138
Tmem179	ENSMUSG00000054013	12	113738395	113749371
Inf2	ENSMUSG00000037679	12	113826995	113853767
Adssl1	ENSMUSG00000011148	12	113858258	113879565
Siva1	ENSMUSG00000064326	12	113883039	113887363
Akt1	ENSMUSG00000001729	12	113892032	113913095
Zbtb42	ENSMUSG00000037638	12	113917039	113920958
AW555464	ENSMUSG00000072825	12	113960385	113984802
Pld4	ENSMUSG00000052160	12	113998866	114007197
Ahnak2	ENSMUSG00000072812	12	114010405	114040868
BC022687	ENSMUSG00000037594	12	114047186	114054456
Cdca4	ENSMUSG00000047832	12	114058448	114067600
Gpr132	ENSMUSG00000021298	12	114089087	114099127
Gm17723	ENSMUSG00000091222	12	114131774	114133577
Jag2	ENSMUSG00000002799	12	114146801	114167706
Nudt14	ENSMUSG00000002804	12	114172944	114180329
Brf1	ENSMUSG00000011158	12	114198073	114238832
Btbd6	ENSMUSG00000002803	12	114214693	114217141
Pacs2	ENSMUSG00000021143	12	114252719	114312612
Tex22	ENSMUSG00000012211	12	114312713	114327128
Mta1	ENSMUSG00000021144	12	114336489	114375417
Crip2	ENSMUSG00000006356	12	114378447	114383715
Crip1	ENSMUSG00000006360	12	114390223	114392088
4930427A07Rik	ENSMUSG00000037466	12	114394632	114413736
Gm15995	ENSMUSG00000090193	12	112964603	112965338
Gm15996	ENSMUSG00000090026	12	112968305	112970042
A230087F16Rik	ENSMUSG00000086210	12	112522973	112532199
Gm10425	ENSMUSG00000072830	12	112665085	112669157
2810029C07Rik	ENSMUSG00000091750	12	112810532	112812613
Gm17274	ENSMUSG00000090980	12	114184574	114188723
Mir203	ENSMUSG00000065574	12	113369091	113369166
Mir3073	ENSMUSG00000093090	12	113347449	113347533
Snora28	ENSMUSG00000064493	12	112779152	112779278
Tmem121	ENSMUSG00000049036	12	114424114	114427731
U6	ENSMUSG00000087842	12	114452360	114452463
Ighe	ENSMUSG00000087642	12	114509391	114511457
Ighg2c	ENSMUSG00000076612	12	114523536	114527141
Gm17421	ENSMUSG00000090726	12	114606713	114607927
Gm11029	ENSMUSG00000078993	12	114655095	114657149
Adam6b	ENSMUSG00000051804	12	114727756	114730229
Adam6a	ENSMUSG00000043945	12	114782119	114784625
Ighe	ENSMUSG00000076611	12	114509484	114511358
Ighg2b	ENSMUSG00000076613	12	114544600	114546144
Ighg1	ENSMUSG00000076614	12	114567187	114568734
Ighg3	ENSMUSG00000076615	12	114597876	114599443
Ighm	ENSMUSG00000076617	12	114659078	114660941
Ighj4	ENSMUSG00000076618	12	114666725	114666778
Ighj3	ENSMUSG00000076619	12	114667296	114667343
Ighj2	ENSMUSG00000076620	12	114667725	114667778
Ighj1	ENSMUSG00000076621	12	114667992	114668044
Ighd4-1	ENSMUSG00000076622	12	114668739	114668749
Ighd3-2	ENSMUSG00000076623	12	114686425	114686440
Ighd5-6	ENSMUSG00000091062	12	114687799	114687810
Ighd2-8	ENSMUSG00000076624	12	114689062	114689078
Ighd5-5	ENSMUSG00000091857	12	114693153	114693162
Ighd2-7	ENSMUSG00000076625	12	114694931	114694947
Ighd5-8	ENSMUSG00000091051	12	114698075	114698103
Ighd5-4	ENSMUSG00000091630	12	114698312	114698321
Ighd2-6	ENSMUSG00000076626	12	114699580	114699596
Ighd5-7	ENSMUSG00000092160	12	114702735	114702763
Ighd5-3	ENSMUSG00000091334	12	114702972	114702981
Ighd2-5	ENSMUSG00000076627	12	114704238	114704254
Ighd5-2	ENSMUSG00000091394	12	114707637	114707646
Ighd2-4	ENSMUSG00000076628	12	114708905	114708921
Ighd6-2	ENSMUSG00000091704	12	114713086	114713114
Ighd2-3	ENSMUSG00000076629	12	114713611	114713627
Ighd6-1	ENSMUSG00000090563	12	114718354	114718382
Ighd1-1	ENSMUSG00000076630	12	114720381	114720403
Ighd3-1	ENSMUSG00000076631	12	114763524	114763540
Ighd5-1	ENSMUSG00000091517	12	114765011	114765020
Gm16968	ENSMUSG00000076632	12	114766243	114766265
Ighv2-1	ENSMUSG00000091606	12	114812453	114812892
Ighv5-2	ENSMUSG00000076633	12	114816715	114817201
Ighv2-2	ENSMUSG00000076634	12	114826478	114826911
Ighv5-4	ENSMUSG00000076635	12	114835657	114836116
Ighv2-3	ENSMUSG00000076636	12	114849395	114849828
Ighv5-6	ENSMUSG00000076637	12	114863717	114864167
Ighv2-4	ENSMUSG00000076638	12	114891502	114891935
Gm17309	ENSMUSG00000090395	12	114893178	114893455
Ighv5-9	ENSMUSG00000076639	12	114899980	114900439
Ighv2-5	ENSMUSG00000076640	12	114923693	114924126
Ighv5-12	ENSMUSG00000076641	12	114940335	114940789
Ighv2-6	ENSMUSG00000076642	12	114954886	114955314
Ighv5-9-1	ENSMUSG00000076643	12	114974322	114974781
Ighv2-9-1	ENSMUSG00000076645	12	115008061	115008494
Ighv2-6-8	ENSMUSG00000076646	12	115034354	115034778
Ighv2-7	ENSMUSG00000076647	12	115045525	115045958
Ighv5-15	ENSMUSG00000076648	12	115064857	115065332
Ighv5-16	ENSMUSG00000076649	12	115076737	115077194
Ighv5-17	ENSMUSG00000076650	12	115097360	115097827
Ighv2-9	ENSMUSG00000076651	12	115117307	115117740
Ighv7-1	ENSMUSG00000076652	12	115134625	115135157
Ighv7-2	ENSMUSG00000076653	12	115150236	115150694
Ighv14-1	ENSMUSG00000076654	12	115170164	115170593
Ighv4-1	ENSMUSG00000076655	12	115186493	115186943
Ighv3-1	ENSMUSG00000076669	12	115202599	115202894
Ighv11-1	ENSMUSG00000076657	12	115220090	115220552
Ighv14-2	ENSMUSG00000076658	12	115232680	115233109
Ighv3-2	ENSMUSG00000078992	12	115272144	115272302
Ighv11-2	ENSMUSG00000076659	12	115286452	115286915
Ighv14-3	ENSMUSG00000076660	12	115298056	115298484
Ighv16-1	ENSMUSG00000076661	12	115307039	115307337
Ighv9-1	ENSMUSG00000076662	12	115332139	115332432
Ighv9-2	ENSMUSG00000076663	12	115347212	115347641
Ighv9-3	ENSMUSG00000076664	12	115378903	115379333
Ighv7-3	ENSMUSG00000076665	12	115391395	115391855
Ighv14-4	ENSMUSG00000076666	12	115414655	115415073
Ighv3-3	ENSMUSG00000076667	12	115434650	115434945
AC073553.3	ENSMUSG00000092748	12	114663361	114663438
AC073553.2	ENSMUSG00000092737	12	114662960	114663029
AC073553.1	ENSMUSG00000092683	12	114662856	114662933
Ighv3-5	ENSMUSG00000076670	12	115500483	115501161
Ighv13-2	ENSMUSG00000087582	12	115595972	115596429
Ighv7-4	ENSMUSG00000076668	12	115460999	115461465
Ighv13-1	ENSMUSG00000076671	12	115505818	115506117
Ighv3-6	ENSMUSG00000076672	12	115526363	115526793
Ighv9-4	ENSMUSG00000076673	12	115538172	115538465
Ighv3-8	ENSMUSG00000076674	12	115560585	115561012
Ighv12-3	ENSMUSG00000076676	12	115604737	115605165
Ighv6-3	ENSMUSG00000076677	12	115629923	115630380
Ighv6-6	ENSMUSG00000076680	12	115672999	115673455
Ighv1-2	ENSMUSG00000078991	12	115707316	115707438
Ighv10-1	ENSMUSG00000076683	12	115717216	115717662
Ighv1-4	ENSMUSG00000076684	12	115725347	115725780
Ighv1-5	ENSMUSG00000076685	12	115751541	115751834
Ighv10-3	ENSMUSG00000076686	12	115761652	115762098
Ighv1-7	ENSMUSG00000076687	12	115776706	115776999
Ighv15-2	ENSMUSG00000076688	12	115802789	115803223
Ighv1-9	ENSMUSG00000076689	12	115821780	115822213
Ighv1-12	ENSMUSG00000076691	12	115854061	115854354
Gm17686	ENSMUSG00000090765	12	115868891	115869184
Ighv1-14	ENSMUSG00000076692	12	115884783	115885076
Ighv1-15	ENSMUSG00000076693	12	115895567	115895988
Ighv1-18	ENSMUSG00000076695	12	115920885	115921276
Ighv1-73	ENSMUSG00000057610	12	117028913	117029095
Zfp386	ENSMUSG00000042063	12	117280562	117299060
Vipr2	ENSMUSG00000011171	12	117316196	117384734
Wdr60	ENSMUSG00000042050	12	117445523	117501498
Gm11027	ENSMUSG00000078984	12	117513859	117514085
Esyt2	ENSMUSG00000021171	12	117519695	117611569
D430020J02Rik	ENSMUSG00000091262	12	117643573	117664338
Ncapg2	ENSMUSG00000042029	12	117643875	117702004
Ptprn2	ENSMUSG00000056553	12	117724193	118516640
RP24-386J17.2	ENSMUSG00000093765	12	117341242	117377121
Gm17626	ENSMUSG00000091100	12	117286040	117290093
Ighv1-52	ENSMUSG00000076713	12	116383698	116384130
Ighv1-53	ENSMUSG00000076714	12	116396614	116397046
Ighv8-6	ENSMUSG00000076715	12	116403988	116404288
Ighv1-54	ENSMUSG00000076716	12	116431886	116432319
Ighv1-55	ENSMUSG00000076717	12	116446306	116446738
Ighv1-56	ENSMUSG00000076718	12	116481013	116481306
Ighv8-8	ENSMUSG00000076719	12	116532289	116532709
Ighv1-58	ENSMUSG00000076720	12	116550377	116550807
Ighv1-59	ENSMUSG00000076721	12	116573293	116573725
Ighv1-61	ENSMUSG00000076722	12	116597351	116597783
Ighv1-62-1	ENSMUSG00000090959	12	116625110	116625199
Ighv1-62-2	ENSMUSG00000091241	12	116684620	116684921
Ighv1-62-3	ENSMUSG00000076723	12	116699210	116699642
Ighv8-9	ENSMUSG00000076724	12	116706543	116706843
Ighv1-63	ENSMUSG00000076725	12	116733836	116734269
Ighv1-64	ENSMUSG00000076726	12	116745756	116746188
Ighv8-11	ENSMUSG00000076727	12	116805376	116805796
Ighv1-66	ENSMUSG00000076728	12	116831321	116831754
Ighv1-67	ENSMUSG00000076729	12	116842151	116842444
Ighv1-69	ENSMUSG00000076730	12	116861372	116861806
Ighv8-12	ENSMUSG00000076731	12	116886172	116886572
Ighv1-71	ENSMUSG00000091301	12	116980416	116980717
Ighv1-72	ENSMUSG00000076732	12	116996195	116996627
Ighv8-13	ENSMUSG00000076733	12	117003544	117003846
Gm16710	ENSMUSG00000076734	12	117040859	117041291
Ighv8-14	ENSMUSG00000091087	12	117046672	117046791
Ighv1-75	ENSMUSG00000076735	12	117072161	117072607
Ighv1-76	ENSMUSG00000091843	12	117086092	117086385
Ighv1-77	ENSMUSG00000092156	12	117100078	117100371
Ighv1-78	ENSMUSG00000091338	12	117106984	117107277
Ighv1-80	ENSMUSG00000076738	12	117150555	117150987
Ighv1-81	ENSMUSG00000076739	12	117158490	117158923
Ighv1-82	ENSMUSG00000076740	12	117190749	117191042
Ighv1-83	ENSMUSG00000076741	12	117202028	117202318
Ighv1-84	ENSMUSG00000076742	12	117218913	117219345
Ighv1-85	ENSMUSG00000076743	12	117238239	117238672
U6	ENSMUSG00000065685	12	117411786	117411892
U6	ENSMUSG00000084629	12	117715369	117715472
Gm9742	ENSMUSG00000091053	13	8029074	8037352
Adarb2	ENSMUSG00000052551	13	8202112	8767993
Wdr37	ENSMUSG00000021147	13	8802214	8871155
Idi1	ENSMUSG00000058258	13	8884747	8891697
Rpl10a-ps2	ENSMUSG00000061988	13	8939579	8940223
Gm9745	ENSMUSG00000021148	13	8940951	8947489
Idi2	ENSMUSG00000033520	13	8952109	8960181
Gtpbp4	ENSMUSG00000021149	13	8971317	8995263
Larp4b	ENSMUSG00000033499	13	9093151	9172332
Gm10357	ENSMUSG00000072421	13	8289092	8289361
SNORA17	ENSMUSG00000077164	13	8949167	8949299
SNORA17	ENSMUSG00000077484	13	8944291	8944425
7SK	ENSMUSG00000088442	13	9108551	9108845
SNORA17	ENSMUSG00000077296	13	8955178	8955310
AC125484.1	ENSMUSG00000092884	13	9053855	9053925
AC124732.1	ENSMUSG00000076030	13	8920582	8920684
Dip2c	ENSMUSG00000048264	13	9275774	9668174
Zmynd11	ENSMUSG00000021156	13	9684082	9764567
Chrm3	ENSMUSG00000046159	13	9876381	9878329
Gm17294	ENSMUSG00000091506	13	9386385	9390987
Gm16950	ENSMUSG00000086178	13	10358725	10658139
mmu-mir-2134-4	ENSMUSG00000088609	13	9833715	9833771
7SK	ENSMUSG00000088366	13	9622626	9622873
Etohd2	ENSMUSG00000089875	13	59871326	59875041
Isca1	ENSMUSG00000044792	13	59856770	59871171
Zcchc6	ENSMUSG00000035248	13	59873240	59924508
Gas1	ENSMUSG00000052957	13	60275766	60278726
Gm5084	ENSMUSG00000050765	13	60313294	60314295
Dapk1	ENSMUSG00000021559	13	60703308	60864546
BC051665	ENSMUSG00000042243	13	60883249	60887725
Ctsll3	ENSMUSG00000056728	13	60899611	60904205
4930486L24Rik	ENSMUSG00000050345	13	60943982	60965777
Ctla2b	ENSMUSG00000074874	13	60996712	60998808
Tpbpb	ENSMUSG00000062705	13	61002658	61006208
Ctla2a	ENSMUSG00000044258	13	61035516	61037986
Tpbpa	ENSMUSG00000033834	13	61040053	61043296
Ctsj	ENSMUSG00000055298	13	61101639	61107277
Ctsq	ENSMUSG00000021439	13	61136388	61141992
Ctsr	ENSMUSG00000055679	13	61260575	61265617
Cts6	ENSMUSG00000021441	13	61296493	61304771
Cts8	ENSMUSG00000057446	13	61348108	61356709
Cts7	ENSMUSG00000021440	13	61453822	61459531
Ctsm	ENSMUSG00000074871	13	61637804	61643199
Cts3	ENSMUSG00000074870	13	61665991	61671426
AC123619.1	ENSMUSG00000080666	13	60630657	60630770
U4	ENSMUSG00000084451	13	61029447	61029545
AC122402.1	ENSMUSG00000080668	13	60395033	60395133
Gm6478	ENSMUSG00000074868	13	62136780	62137523
Gm7664	ENSMUSG00000092062	13	62629570	62630319
Gm5665	ENSMUSG00000074863	13	62800766	62828049
Gm16133	ENSMUSG00000089854	13	63434445	63441267
Gm16132	ENSMUSG00000090232	13	63478069	63482353
Gm16134	ENSMUSG00000089868	13	63548238	63548573
Zfp808	ENSMUSG00000074867	13	62231276	62274779
Gm17352	ENSMUSG00000069117	13	62318904	62319329
Gm3604	ENSMUSG00000091183	13	62470223	62473296
Zfp935	ENSMUSG00000055228	13	62555683	62568128
Zfp934	ENSMUSG00000074865	13	62618686	62621904
6720489N17Rik	ENSMUSG00000072066	13	62706550	62708859
Fbp2	ENSMUSG00000021456	13	62938244	62959760
Fbp1	ENSMUSG00000069805	13	62966113	62989642
Gm17367	ENSMUSG00000091141	13	62988822	62988961
2010111I01Rik	ENSMUSG00000021458	13	63066253	63427404
Fancc	ENSMUSG00000021461	13	63406017	63598586
Ptch1	ENSMUSG00000021466	13	63610261	63674474
0610007P08Rik	ENSMUSG00000021470	13	63916548	64001610
Gm16907	ENSMUSG00000086950	13	63390909	63398455
AC156572.1	ENSMUSG00000080346	13	62880954	62881036
U6	ENSMUSG00000075708	13	62892867	62892973
Mir27b	ENSMUSG00000065475	13	63402008	63402104
CT030240.1	ENSMUSG00000076244	13	62725554	62725661
SNORA32	ENSMUSG00000088727	13	62644794	62644863
Mir3074-1	ENSMUSG00000092741	13	63402488	63402604
SNORA25	ENSMUSG00000064997	13	62238290	62238422
AC124426.2	ENSMUSG00000092904	13	62109827	62109936
SNORA70	ENSMUSG00000089002	13	62486278	62486412
SNORA25	ENSMUSG00000075946	13	62644563	62644695
CT573034.1	ENSMUSG00000076248	13	62484597	62484704
AC122357.1	ENSMUSG00000076246	13	62568225	62568331
Mir713	ENSMUSG00000076250	13	62862099	62862206
Mir23b	ENSMUSG00000065599	13	63401780	63401876
AC124426.1	ENSMUSG00000077057	13	62114395	62114504
SNORA32	ENSMUSG00000087978	13	62238122	62238191
Nsmce2	ENSMUSG00000059586	15	59205753	59433238
Trib1	ENSMUSG00000032501	15	59479905	59488105
Gm7713	ENSMUSG00000071750	15	59825985	59826383
4933412E24Rik	ENSMUSG00000071749	15	59846421	59848173
Fam84b	ENSMUSG00000072568	15	60650551	60656635
A1bg	ENSMUSG00000022347	15	60749144	60752825
9930014A18Rik	ENSMUSG00000044513	15	60654520	60663348
SNORA17	ENSMUSG00000077627	15	60535547	60535678
U6	ENSMUSG00000077511	15	59916343	59916449
SNORA42	ENSMUSG00000065812	15	61189426	61189559
Myc	ENSMUSG00000022346	15	61816946	61821929
H2afy3	ENSMUSG00000056590	15	62049096	62050958
Pvt1	ENSMUSG00000072566	15	61869542	62209651
1700029P11Rik	ENSMUSG00000061633	15	81810975	81811993
Xrcc6	ENSMUSG00000022471	15	81818265	81870515
Pppde2	ENSMUSG00000022472	15	81822953	81864292
Nhp2l1	ENSMUSG00000063480	15	81871749	81878028
4930407I10Rik	ENSMUSG00000075524	15	81889581	81896968
Mei1	ENSMUSG00000068117	15	81900426	81957244
Ccdc134	ENSMUSG00000068114	15	81958352	81972630
Srebf2	ENSMUSG00000022463	15	81977696	82035806
Tnfrsf13c	ENSMUSG00000068105	15	82052174	82054790
Cenpm	ENSMUSG00000068101	15	82064209	82075177
1500009C09Rik	ENSMUSG00000068099	15	82082827	82091183
Sept3	ENSMUSG00000022456	15	82105365	82124872
Wbp2nl	ENSMUSG00000022455	15	82129414	82144988
Naga	ENSMUSG00000022453	15	82159962	82169256
Fam109b	ENSMUSG00000049687	15	82169372	82176173
1500032L24Rik	ENSMUSG00000022452	15	82169389	82179521
Ndufa6	ENSMUSG00000022450	15	82180569	82184721
Cyp2d22	ENSMUSG00000061740	15	82200958	82210690
Cyp2d11	ENSMUSG00000068085	15	82219584	82224452
Cyp2d10	ENSMUSG00000014372	15	82233276	82237624
Cyp2d9	ENSMUSG00000068086	15	82282807	82287257
Gm5806	ENSMUSG00000047347	15	82346705	82349711
Cyp2d12	ENSMUSG00000057138	15	82385538	82389843
Cyp2d34	ENSMUSG00000062185	15	82446395	82451337
Cyp2d37-ps	ENSMUSG00000075517	15	82519564	82520929
Cyp2d40	ENSMUSG00000068083	15	82590265	82594613
Gm5062	ENSMUSG00000058613	15	82608361	82612540
Cyp2d26	ENSMUSG00000022445	15	82620537	82624675
Tcf20	ENSMUSG00000041852	15	82639059	82742564
Nfam1	ENSMUSG00000058099	15	82828151	82863736
Serhl	ENSMUSG00000058586	15	82919936	82947104
Rrp7a	ENSMUSG00000018040	15	82943863	82953231
Poldip3	ENSMUSG00000041815	15	82956408	82979814
Cyb5r3	ENSMUSG00000018042	15	82983924	83003022
A4galt	ENSMUSG00000047878	15	83057156	83082204
Arfgap3	ENSMUSG00000054277	15	83130170	83180677
1700001L05Rik	ENSMUSG00000075511	15	83187990	83197707
Pacsin2	ENSMUSG00000016664	15	83206037	83295036
Ttll1	ENSMUSG00000022442	15	83314202	83341323
Bik	ENSMUSG00000016758	15	83357292	83375065
Mcat	ENSMUSG00000048755	15	83377227	83386141
Tspo	ENSMUSG00000041736	15	83394003	83404631
Ttll12	ENSMUSG00000016757	15	83405549	83425587
Scube1	ENSMUSG00000016763	15	83433013	83555451
Mpped1	ENSMUSG00000041708	15	83609897	83688924
Efcab6	ENSMUSG00000022441	15	83697142	83895809
Gm17206	ENSMUSG00000090964	15	82932502	82936359
Gm5417	ENSMUSG00000049414	15	83236042	83236535
AW121686	ENSMUSG00000090940	15	82813300	82819564
n-R5s41	ENSMUSG00000064959	15	82173083	82173201
U12	ENSMUSG00000065176	15	82980074	82980224
AC113593.1	ENSMUSG00000076395	15	82238888	82238973
AC104325.1	ENSMUSG00000092778	15	82147652	82147733
AL583889.1	ENSMUSG00000093243	15	83347366	83347442
Mir33	ENSMUSG00000065465	15	82028552	82028620
Mir3080	ENSMUSG00000092751	15	82789648	82789726
Fgf12	ENSMUSG00000022523	16	28160206	28445313
1600021P15Rik	ENSMUSG00000051065	16	28826262	28929784
Hrasls	ENSMUSG00000022525	16	29209781	29230617
Atp13a5	ENSMUSG00000048939	16	29231937	29378818
Atp13a4	ENSMUSG00000038094	16	29396124	29544950
Gm15752	ENSMUSG00000083141	16	29284052	29284445
Mir690	ENSMUSG00000076064	16	28600021	28600129
Opa1	ENSMUSG00000038084	16	29579420	29654970
Gm1968	ENSMUSG00000075286	16	29958579	29962393
Hes1	ENSMUSG00000022528	16	30064470	30067882
Cpn2	ENSMUSG00000023176	16	30256464	30267618
Lrrc15	ENSMUSG00000052316	16	30269388	30283342
Gp5	ENSMUSG00000047953	16	30307772	30310865
Atp13a3	ENSMUSG00000022533	16	30312509	30388923
Gm17734	ENSMUSG00000090506	16	29811144	29837900
Gm16761	ENSMUSG00000084810	16	29907605	29946603
4632428C04Rik	ENSMUSG00000086897	16	30008753	30021516
Gm17516	ENSMUSG00000080134	16	30200996	30205965
n-R5s32	ENSMUSG00000084444	16	30141929	30142031
Spice1	ENSMUSG00000043065	16	44347234	44388610
Wdr52	ENSMUSG00000071550	16	44394909	44482541
Boc	ENSMUSG00000022687	16	44485158	44559010
BC027231	ENSMUSG00000036208	16	44724414	44737397
Gtpbp8	ENSMUSG00000022668	16	44736881	44746476
Cd200r1	ENSMUSG00000022667	16	44765849	44795091
Cd200r4	ENSMUSG00000062082	16	44811846	44839263
Cd200r2	ENSMUSG00000090176	16	44867210	44915953
Cd200r3	ENSMUSG00000036172	16	44943791	44981493
Ccdc80	ENSMUSG00000022665	16	45093515	45128037
Slc35a5	ENSMUSG00000022664	16	45139686	45158819
Atg3	ENSMUSG00000022663	16	45158898	45188651
Btla	ENSMUSG00000052013	16	45224428	45253008
Cd200	ENSMUSG00000022661	16	45382248	45409166
Gm609	ENSMUSG00000053182	16	45411881	45493082
Slc9a10	ENSMUSG00000033210	16	45535422	45607114
Gcet2	ENSMUSG00000022659	16	45610536	45622980
BC016579	ENSMUSG00000033187	16	45626961	45654231
Tmprss7	ENSMUSG00000033177	16	45656430	45693771
Tagln3	ENSMUSG00000022658	16	45711343	45724721
Abhd10	ENSMUSG00000033157	16	45729838	45743068
Phldb2	ENSMUSG00000033149	16	45746346	45953711
Plcxd2	ENSMUSG00000087141	16	45959376	46010331
Cd96	ENSMUSG00000022657	16	46035770	46120364
Gm4737	ENSMUSG00000048087	16	46153110	46155190
Gm6030	ENSMUSG00000062284	16	45205213	45205614
Gm5406	ENSMUSG00000080715	16	45411693	45412458
Gm16011	ENSMUSG00000081303	16	45426958	45429619
Gm6903	ENSMUSG00000089630	16	45533237	45534602
Gm15591	ENSMUSG00000086237	16	45736616	45737431
Gm15639	ENSMUSG00000086398	16	45745287	45745985
Gm15640	ENSMUSG00000085781	16	45936436	45939392
Gm15638	ENSMUSG00000085826	16	45945719	45971483
Mir3081	ENSMUSG00000093046	16	44558159	44558242
U6	ENSMUSG00000064821	16	46018180	46018286
SNORA17	ENSMUSG00000088503	16	46219949	46220080
Pvrl3	ENSMUSG00000022656	16	46387819	46498638
Gm6912	ENSMUSG00000081624	16	47074311	47076148
7SK	ENSMUSG00000084503	16	47595886	47596199
U6	ENSMUSG00000087732	16	47506432	47506538
Pde10a	ENSMUSG00000023868	17	8718237	9179513
1700010I14Rik	ENSMUSG00000023873	17	9181198	9201184
Gm17728	ENSMUSG00000072968	17	9614925	9615323
Pabpc6	ENSMUSG00000046173	17	9859362	9862569
Qk	ENSMUSG00000062078	17	10399336	10512245
Qk	ENSMUSG00000044407	17	10512810	10513094
Pacrg	ENSMUSG00000037196	17	10595878	11033177
Park2	ENSMUSG00000073465	17	11033258	11133829
A230009B12Rik	ENSMUSG00000089633	17	10649082	10685921
Gm16168	ENSMUSG00000089941	17	10689312	10762262
Gm16169	ENSMUSG00000089907	17	11000700	11019491
6530411M01Rik	ENSMUSG00000073467	17	9340584	9360701
Park2	ENSMUSG00000023826	17	11259991	12254519
Agpat4	ENSMUSG00000023827	17	12311570	12412511
Map3k4	ENSMUSG00000014426	17	12420489	12511614
Map3k4	ENSMUSG00000079716	17	12425347	12464050
Tdgf1-ps2	ENSMUSG00000063911	17	12382787	12383322
Plg	ENSMUSG00000059481	17	12571475	12612250
Slc22a3	ENSMUSG00000023828	17	12612838	12700570
4732491K20Rik	ENSMUSG00000091214	17	12511751	12520116
SNORA17	ENSMUSG00000077476	17	12493902	12494041
Airn	ENSMUSG00000078247	17	12934177	13052988
Gm16574	ENSMUSG00000089769	17	13011659	13012403
Gm7162	ENSMUSG00000089817	17	13012685	13013708
Slc22a2	ENSMUSG00000040966	17	12777055	12821331
Slc22a1	ENSMUSG00000023829	17	12841740	12868704
Igf2r	ENSMUSG00000023830	17	12875272	12962530
Gm17592	ENSMUSG00000091640	17	13030801	13031000
Mas1	ENSMUSG00000068037	17	13033945	13061009
Mrgprh	ENSMUSG00000059408	17	13068900	13070708
Pnldc1	ENSMUSG00000073460	17	13081768	13102866
Mrpl18	ENSMUSG00000057388	17	13104215	13109211
Tcp1	ENSMUSG00000068039	17	13108567	13117933
7SK	ENSMUSG00000089525	17	12963497	12963748
AL589878.1	ENSMUSG00000092913	17	13057991	13058106
Gm7393	ENSMUSG00000092577	17	15078970	15079708
Gm7177	ENSMUSG00000091229	17	15672029	15672568
Smoc2	ENSMUSG00000023886	17	14416513	14541797
Thbs2	ENSMUSG00000023885	17	14802507	14831269
Gm3222	ENSMUSG00000079311	17	14846073	14847062
Wdr27	ENSMUSG00000046991	17	14966338	15071658
1600012H06Rik	ENSMUSG00000050088	17	15080189	15096575
Phf10	ENSMUSG00000023883	17	15081999	15129820
Gm3417	ENSMUSG00000079710	17	15101153	15115621
9030025P20Rik	ENSMUSG00000079709	17	15115829	15127768
Dll1	ENSMUSG00000014773	17	15504318	15513836
Gm3448	ENSMUSG00000036648	17	15132803	15147148
Gm3435	ENSMUSG00000073455	17	15146804	15159909
Pdcd2	ENSMUSG00000014771	17	15656172	15664265
Prdm9	ENSMUSG00000051977	17	15680043	15701318
Rgmb	ENSMUSG00000048027	17	15941626	15963550
Fam120b	ENSMUSG00000014763	17	15533210	15570544
Psmb1	ENSMUSG00000014769	17	15612685	15635240
Tbp	ENSMUSG00000014767	17	15636852	15665343
Gm5091	ENSMUSG00000087655	17	15368549	15377747
A930024N18Rik	ENSMUSG00000085544	17	15511964	15516439
Chd1	ENSMUSG00000023852	17	15841931	15909574
Tcte3	ENSMUSG00000079707	17	15164115	15178523
2210404J11Rik	ENSMUSG00000036552	17	15178605	15201196
U6	ENSMUSG00000064750	17	15974513	15974619
U7	ENSMUSG00000089053	17	14928948	14929011
Gm9805	ENSMUSG00000046088	17	22826738	22826908
Zfp945	ENSMUSG00000059142	17	22983664	23004101
Vmn2r-ps128	ENSMUSG00000090355	17	23053845	23069908
Vmn2r113	ENSMUSG00000092111	17	23080151	23095781
Vmn2r-ps129	ENSMUSG00000093569	17	23129673	23145937
Vmn2r-ps130	ENSMUSG00000093754	17	23198334	23214392
Zfp40	ENSMUSG00000002617	17	23310836	23330219
Vmn2r114	ENSMUSG00000091945	17	23427901	23449280
Vmn2r115	ENSMUSG00000091076	17	23480944	23497095
Vmn2r116	ENSMUSG00000090966	17	23521770	23538831
Vmn2r117	ENSMUSG00000091407	17	23596642	23616564
Gm5146	ENSMUSG00000067882	17	23688040	23690455
Zfp213	ENSMUSG00000071256	17	23693736	23701193
Zfp13	ENSMUSG00000062012	17	23712811	23736454
Zscan10	ENSMUSG00000023902	17	23737823	23747986
Mmp25	ENSMUSG00000023903	17	23766425	23782236
Ccdc64b	ENSMUSG00000043782	17	23797490	23805577
Thoc6	ENSMUSG00000041319	17	23805581	23810849
Hcfc1r1	ENSMUSG00000023904	17	23810575	23812491
Tnfrsf12a	ENSMUSG00000023905	17	23812414	23814416
Cldn6	ENSMUSG00000023906	17	23816332	23819413
Cldn9	ENSMUSG00000066720	17	23819552	23820985
Pkmyt1	ENSMUSG00000023908	17	23863303	23873696
Paqr4	ENSMUSG00000023909	17	23873153	23877297
Kremen2	ENSMUSG00000040680	17	23878167	23882796
Flywch1	ENSMUSG00000040097	17	23889765	23908558
Flywch2	ENSMUSG00000023911	17	23913883	23923048
Srrm2	ENSMUSG00000039218	17	23940154	23961706
Tceb2	ENSMUSG00000055839	17	23961707	23965958
Prss33	ENSMUSG00000049620	17	23970327	23973023
Prss41	ENSMUSG00000024114	17	23973752	23981139
Prss32	ENSMUSG00000048992	17	23980822	23996743
Prss21	ENSMUSG00000024116	17	24005023	24010081
Dcpp1	ENSMUSG00000061980	17	24017843	24019820
Dcpp2	ENSMUSG00000067843	17	24017848	24037754
Dcpp3	ENSMUSG00000057417	17	24054425	24056408
Sbp	ENSMUSG00000024128	17	24079342	24087147
Sbpl	ENSMUSG00000024125	17	24090052	24091886
Prss30	ENSMUSG00000024124	17	24109093	24112197
Prss22	ENSMUSG00000045027	17	24130502	24135067
Prss27	ENSMUSG00000050762	17	24175111	24182921
Kctd5	ENSMUSG00000016946	17	24184701	24210452
Pdpk1	ENSMUSG00000024122	17	24210647	24287891
Amdhd2	ENSMUSG00000036820	17	24292800	24300733
Atp6v0c	ENSMUSG00000024121	17	24300833	24306647
Tbc1d24	ENSMUSG00000036473	17	24312376	24342507
Ntn3	ENSMUSG00000079662	17	24340793	24346332
1600002H07Rik	ENSMUSG00000024118	17	24351999	24357796
Ccnf	ENSMUSG00000072082	17	24359494	24388292
Abca17	ENSMUSG00000035435	17	24401204	24487974
Abca3	ENSMUSG00000024130	17	24488895	24547146
Gm10506	ENSMUSG00000073439	17	24539866	24540026
D330041H03Rik	ENSMUSG00000073437	17	24548972	24550569
Rnps1	ENSMUSG00000034681	17	24551620	24562840
Eci1	ENSMUSG00000024132	17	24563628	24576261
Dnase1l2	ENSMUSG00000024136	17	24577026	24580050
E4f1	ENSMUSG00000024137	17	24580737	24592256
Pgp	ENSMUSG00000043445	17	24607418	24608536
Mlst8	ENSMUSG00000024142	17	24610497	24616023
9930021D14Rik	ENSMUSG00000045744	17	24610829	24612414
Caskin1	ENSMUSG00000033597	17	24625728	24645850
Traf7	ENSMUSG00000052752	17	24645507	24664883
Rab26	ENSMUSG00000079657	17	24664186	24671155
Pkd1	ENSMUSG00000032855	17	24686895	24733459
Tsc2	ENSMUSG00000002496	17	24732882	24769574
Nthl1	ENSMUSG00000041429	17	24769627	24775783
Slc9a3r2	ENSMUSG00000002504	17	24776227	24787250
Gm18415	ENSMUSG00000093433	17	23151354	23152000
Gm18396	ENSMUSG00000093564	17	23182465	23182825
Gm18397	ENSMUSG00000093703	17	23223039	23223625
Gm18416	ENSMUSG00000093685	17	23252334	23254694
Vmn2r-ps131	ENSMUSG00000093517	17	23284773	23287643
Vmn2r-ps132	ENSMUSG00000093714	17	23304305	23304955
Vmn2r-ps133	ENSMUSG00000093493	17	23378617	23414145
Vmn2r-ps134	ENSMUSG00000093653	17	23577978	23583134
1520401A03Rik	ENSMUSG00000043747	17	23841455	23859751
Gm16275	ENSMUSG00000086719	17	23908808	23914730
Gm15947	ENSMUSG00000089697	17	23990126	23995614
BC028777	ENSMUSG00000085185	17	24345806	24358675
2610019E17Rik	ENSMUSG00000093565	17	24665193	24665689
Gm17633	ENSMUSG00000090725	17	23693736	23695280
9530082P21Rik	ENSMUSG00000086281	17	23880201	23891032
D930048G16Rik	ENSMUSG00000090444	17	23927671	23931208
Gm16386	ENSMUSG00000073442	17	22921765	22954708
AC117577.2	ENSMUSG00000093270	17	24371472	24371549
SNORD60	ENSMUSG00000064768	17	24665421	24665498
U6	ENSMUSG00000064998	17	24499383	24499489
AC132367.1	ENSMUSG00000080342	17	24731923	24732016
SNORA17	ENSMUSG00000077184	17	24160167	24160295
AC117577.1	ENSMUSG00000080568	17	24441614	24441734
Mir5125	ENSMUSG00000092981	17	23960258	23960336
H2-T10	ENSMUSG00000079491	17	36252821	36258410
Gm19684	ENSMUSG00000092277	17	36258623	36266637
Gm7030	ENSMUSG00000092243	17	36264424	36266370
2410017I17Rik	ENSMUSG00000038311	17	36281963	36299518
Gm8909	ENSMUSG00000073402	17	36301388	36305482
Gm8909	ENSMUSG00000092478	17	36301389	36305482
H2-T3	ENSMUSG00000054128	17	36322517	36327232
Rpp21	ENSMUSG00000024446	17	36392590	36395014
Trim39	ENSMUSG00000045409	17	36395818	36409192
H2-M10.2	ENSMUSG00000023083	17	36421172	36423435
H2-M10.1	ENSMUSG00000024448	17	36459803	36463100
H2-M10.3	ENSMUSG00000058124	17	36501949	36505362
H2-M10.4	ENSMUSG00000048231	17	36595862	36599279
H2-M11	ENSMUSG00000037537	17	36684020	36686195
H2-M9	ENSMUSG00000067201	17	36776230	36779611
H2-M1	ENSMUSG00000037334	17	36806953	36809164
H2-M10.5	ENSMUSG00000037246	17	36909855	36913179
H2-M10.6	ENSMUSG00000037130	17	36949116	36952509
Trim26	ENSMUSG00000024457	17	36974079	36996343
Trim15	ENSMUSG00000050747	17	36997638	37004155
Trim10	ENSMUSG00000073400	17	37006519	37014770
Trim40	ENSMUSG00000073399	17	37018543	37027068
Trim31	ENSMUSG00000058063	17	37035063	37047159
Rnf39	ENSMUSG00000036492	17	37079863	37084931
Ppp1r11	ENSMUSG00000036398	17	37085301	37088686
Znrd1	ENSMUSG00000036315	17	37091303	37095504
Znrd1as	ENSMUSG00000036214	17	37095537	37102567
2410137M14Rik	ENSMUSG00000064308	17	37114646	37118182
H2-M5	ENSMUSG00000024459	17	37121006	37126482
Zfp57	ENSMUSG00000036036	17	37138108	37147580
Mog	ENSMUSG00000076439	17	37147691	37160343
Gabbr1	ENSMUSG00000024462	17	37182911	37212012
Olfr90	ENSMUSG00000056600	17	37222136	37223181
Olfr91	ENSMUSG00000067192	17	37229879	37230817
Olfr92	ENSMUSG00000091153	17	37247987	37248925
Olfr93	ENSMUSG00000091601	17	37287952	37288996
Ubd	ENSMUSG00000035186	17	37330837	37333040
Olfr94	ENSMUSG00000043827	17	37333653	37334956
Olfr95	ENSMUSG00000049561	17	37347839	37348812
Olfr96	ENSMUSG00000064121	17	37362036	37363086
Olfr97	ENSMUSG00000058802	17	37368359	37369417
Olfr98	ENSMUSG00000063660	17	37399656	37400694
H2-M3	ENSMUSG00000016206	17	37407165	37411429
Olfr99	ENSMUSG00000061972	17	37416446	37417363
Olfr101	ENSMUSG00000092077	17	37436391	37437429
Olfr102	ENSMUSG00000091531	17	37450356	37451382
Olfr103	ENSMUSG00000049618	17	37473234	37476623
Olfr107	ENSMUSG00000063188	17	37542422	37543454
Olfr108	ENSMUSG00000059687	17	37582425	37583462
Olfr109	ENSMUSG00000029184	17	37603153	37604097
H2-M2	ENSMUSG00000016283	17	37617796	37620497
Olfr110	ENSMUSG00000090894	17	37629413	37636619
Olfr111	ENSMUSG00000090675	17	37666902	37667942
Olfr112	ENSMUSG00000051611	17	37700173	37704039
Olfr113	ENSMUSG00000092292	17	37711399	37712393
Olfr114	ENSMUSG00000062629	17	37726327	37727326
Olfr115	ENSMUSG00000092413	17	37746730	37764054
Olfr116	ENSMUSG00000061336	17	37760613	37761578
Olfr117	ENSMUSG00000062337	17	37796323	37797276
Olfr118	ENSMUSG00000080990	17	37808970	37809935
Olfr119	ENSMUSG00000059964	17	37833609	37838763
Olfr120	ENSMUSG00000063994	17	37862944	37863936
Olfr121	ENSMUSG00000060017	17	37885811	37889954
Olfr122	ENSMUSG00000083947	17	37905552	37909734
Olfr123	ENSMUSG00000045202	17	37932380	37933320
Olfr124	ENSMUSG00000044985	17	37942014	37943135
Olfr125	ENSMUSG00000050613	17	37971856	37972973
Olfr126	ENSMUSG00000061777	17	37987539	37988498
Olfr127	ENSMUSG00000058114	17	38040467	38041561
Olfr128	ENSMUSG00000059030	17	38060483	38061500
Olfr761	ENSMUSG00000071084	17	38088996	38089967
Olfr129	ENSMUSG00000081724	17	38191544	38196729
Olfr130	ENSMUSG00000067187	17	38204118	38205197
Olfr131	ENSMUSG00000043312	17	38218915	38225638
Gm4256	ENSMUSG00000092508	17	36544384	36546494
Gm9612	ENSMUSG00000092231	17	36572848	36573215
Gm5227	ENSMUSG00000092437	17	36581122	36581694
Gm4830	ENSMUSG00000044538	17	36589239	36590198
Gm20452	ENSMUSG00000092290	17	36637305	36638526
Gm20451	ENSMUSG00000092493	17	36644125	36645897
Gm20454	ENSMUSG00000092296	17	36671226	36671446
Gm20453	ENSMUSG00000092414	17	36682833	36683058
Gm8868	ENSMUSG00000092332	17	36695566	36698613
Gm20450	ENSMUSG00000092606	17	36734843	36734989
Rpl9-ps5	ENSMUSG00000092485	17	36794001	36794571
Gm8877	ENSMUSG00000092298	17	36838574	36840154
Gm20549	ENSMUSG00000092377	17	36840720	36841148
Gm20523	ENSMUSG00000092172	17	36842669	36843792
Gm20525	ENSMUSG00000092343	17	36860179	36860226
Gm20526	ENSMUSG00000092435	17	36860893	36861220
Gm4271	ENSMUSG00000092521	17	36869940	36871453
Gm20401	ENSMUSG00000092385	17	36889458	36890924
Gm8878	ENSMUSG00000092460	17	36896802	36899368
1700031A10Rik	ENSMUSG00000092239	17	37060737	37070377
H2-M6-ps	ENSMUSG00000083534	17	37106140	37108341
Gm4831	ENSMUSG00000092339	17	37250800	37251393
Gm19807	ENSMUSG00000092223	17	37267854	37268520
Vhl-ps1	ENSMUSG00000092408	17	37301318	37301914
Olfr753-ps1	ENSMUSG00000090556	17	37306672	37307591
Gm4252	ENSMUSG00000092502	17	36385581	36385893
Gm20546	ENSMUSG00000092392	17	36385766	36390624
Gm6633	ENSMUSG00000092317	17	36389062	36389331
Gm318	ENSMUSG00000092555	17	36534389	36535462
BC023719	ENSMUSG00000092365	17	36169365	36254066
Gm8815	ENSMUSG00000092224	17	36231913	36233750
C920025E04Rik	ENSMUSG00000073405	17	36245531	36248633
Gm9574	ENSMUSG00000073980	17	36273812	36275385
Gm9574	ENSMUSG00000092630	17	36275542	36275788
Gm10499	ENSMUSG00000073403	17	36278703	36282868
Gm17782	ENSMUSG00000092366	17	36293478	36293754
Gm6659	ENSMUSG00000092289	17	36294933	36295479
Gm20478	ENSMUSG00000092474	17	36304927	36308750
Gm6623	ENSMUSG00000092374	17	36316059	36316602
Gm20495	ENSMUSG00000092480	17	36319141	36319375
Gm4246	ENSMUSG00000092240	17	36331541	36331756
Gm20447	ENSMUSG00000092306	17	36334597	36335449
Gm8835	ENSMUSG00000092457	17	36339294	36343268
Gm5682	ENSMUSG00000092265	17	36347640	36362177
Gm20392	ENSMUSG00000092362	17	36352500	36353001
Gm10074	ENSMUSG00000060087	17	36362945	36363219
Gm20545	ENSMUSG00000092428	17	36363760	36363969
Gm18604	ENSMUSG00000092612	17	36365871	36366703
Gm20391	ENSMUSG00000092363	17	36374199	36374304
Gm20497	ENSMUSG00000092403	17	37307707	37322675
Gm7031	ENSMUSG00000092270	17	37312799	37313717
Gm20429	ENSMUSG00000092591	17	37383906	37400009
Olfr754-ps1	ENSMUSG00000092340	17	37386420	37387812
Olfr755-ps1	ENSMUSG00000092556	17	37413593	37415050
Olfr756-ps1	ENSMUSG00000092524	17	37422087	37423014
Olfr104-ps	ENSMUSG00000064169	17	37499053	37500032
Olfr757-ps1	ENSMUSG00000092542	17	37513801	37514169
Olfr105-ps	ENSMUSG00000060137	17	37519452	37520431
Olfr758-ps1	ENSMUSG00000092396	17	37524325	37525163
Olfr106-ps	ENSMUSG00000059346	17	37531475	37532455
Olfr759-ps1	ENSMUSG00000092568	17	37544706	37545426
Gm18808	ENSMUSG00000092477	17	37550087	37552068
Olfr760-ps1	ENSMUSG00000092601	17	37588386	37588942
Olfr113	ENSMUSG00000059219	17	37711403	37712366
Olfr115	ENSMUSG00000055340	17	37746736	37747700
Gm7335	ENSMUSG00000067189	17	37850492	37850869
Gm20524	ENSMUSG00000092302	17	37936979	37939373
Gm9577	ENSMUSG00000092269	17	37977255	37979874
Gm18737	ENSMUSG00000092458	17	37997752	37998688
Gm18520	ENSMUSG00000092468	17	38022319	38022976
Gm20543	ENSMUSG00000092295	17	38074311	38077733
Gm20542	ENSMUSG00000092513	17	38079965	38080336
Gm5967	ENSMUSG00000092186	17	38084137	38084630
Gm18522	ENSMUSG00000092213	17	38111589	38112238
Gm20541	ENSMUSG00000092390	17	38146592	38149341
Gm18833	ENSMUSG00000092461	17	38216565	38217426
7SK	ENSMUSG00000084750	17	36378734	36379051
7SK	ENSMUSG00000088819	17	37152288	37152535
U4	ENSMUSG00000084425	17	37404021	37404183
CR956641.1	ENSMUSG00000092860	17	37127411	37127705
SNORA51	ENSMUSG00000065651	17	36979171	36979297
3110082D06Rik	ENSMUSG00000042256	17	42452896	42644690
Opn5	ENSMUSG00000043972	17	42693732	42748262
Gpr115	ENSMUSG00000023918	17	42793840	42829233
Gpr111	ENSMUSG00000057899	17	42845885	42879128
Cd2ap	ENSMUSG00000061665	17	42929900	43013373
Tnfrsf21	ENSMUSG00000023915	17	43153504	43226137
Gpr110	ENSMUSG00000041293	17	43407278	43461686
Gpr116	ENSMUSG00000056492	17	43526415	43596506
Mep1a	ENSMUSG00000023914	17	43611273	43639761
Pla2g7	ENSMUSG00000023913	17	43705047	43749150
Tdrd6	ENSMUSG00000040140	17	43752284	43767248
Slc25a27	ENSMUSG00000023912	17	43778849	43804125
Cyp39a1	ENSMUSG00000023963	17	43804374	43888380
Rcan2	ENSMUSG00000039601	17	43938800	44176465
Enpp5	ENSMUSG00000023960	17	44215762	44223516
Enpp4	ENSMUSG00000023961	17	44233257	44242758
1700071M16Rik	ENSMUSG00000090307	17	43725289	43729391
U4	ENSMUSG00000064582	17	43591204	43591346
U2	ENSMUSG00000084474	17	43835312	43835501
7SK	ENSMUSG00000088576	17	44098505	44098790
Clic5	ENSMUSG00000023959	17	44325521	44417117
Runx2	ENSMUSG00000039153	17	44632936	44951746
Runx2	ENSMUSG00000092206	17	44744480	44951746
Gm16317	ENSMUSG00000090048	17	44698939	44700121
n-R5s27	ENSMUSG00000070209	17	44777974	44778092
9530072K05Rik	ENSMUSG00000089849	17	44847171	44850874
Gm10497	ENSMUSG00000073394	17	44872794	44874561
Supt3h	ENSMUSG00000038954	17	44914101	45256239
Gm4766	ENSMUSG00000044887	17	45300176	45301117
Cdc5l	ENSMUSG00000023932	17	45528841	45570656
Spats1	ENSMUSG00000023935	17	45582830	45611887
Gm9104	ENSMUSG00000071077	17	45602737	45603252
Aars2	ENSMUSG00000023938	17	45643790	45657791
Tcte1	ENSMUSG00000023949	17	45660383	45679628
Gm17441	ENSMUSG00000092070	17	45676807	45678912
Tmem151b	ENSMUSG00000050405	17	45681776	45686348
Nfkbie	ENSMUSG00000023947	17	45692665	45700118
Slc35b2	ENSMUSG00000037089	17	45700909	45704619
Hsp90ab1	ENSMUSG00000023944	17	45704724	45710220
Slc29a1	ENSMUSG00000023942	17	45722149	45736555
B230354K17Rik	ENSMUSG00000073393	17	45570801	45579493
Gm17080	ENSMUSG00000067389	17	45723069	45725326
Gm7325	ENSMUSG00000079471	17	45737916	45739051
Capn11	ENSMUSG00000058626	17	45767153	45796274
Tmem63b	ENSMUSG00000036026	17	45797120	45823854
Gm16172	ENSMUSG00000086472	17	45800468	45803158
U6	ENSMUSG00000065743	17	45757628	45757708
Mrpl14	ENSMUSG00000023939	17	45823271	45835444
Gm16862	ENSMUSG00000086615	17	45871455	45925543
Vegfa	ENSMUSG00000023951	17	46153942	46169326
Mrps18a	ENSMUSG00000023967	17	46247935	46265859
Rsph9	ENSMUSG00000023966	17	46258984	46281165
Mad2l1bp	ENSMUSG00000034509	17	46284338	46290502
Gtpbp2	ENSMUSG00000023952	17	46297981	46306319
Polh	ENSMUSG00000023953	17	46308953	46339574
Xpo5	ENSMUSG00000067150	17	46339804	46379248
Mir693	ENSMUSG00000076141	17	46368480	46368568
U6	ENSMUSG00000064710	17	46369674	46369780
Polr1c	ENSMUSG00000067148	17	46380869	46385003
Yipf3	ENSMUSG00000071074	17	46385029	46389486
Gm88	ENSMUSG00000071073	17	46391114	46394265
Tjap1	ENSMUSG00000012296	17	46394825	46419962
Iigp1	ENSMUSG00000054072	18	60535683	60552281
F830016B08Rik	ENSMUSG00000090942	18	60453034	60462670
Hmgxb3	ENSMUSG00000024622	18	61290933	61336704
BC023105	ENSMUSG00000063388	18	60598949	60603502
2010002N04Rik	ENSMUSG00000038059	18	60633847	60661637
Dctn4	ENSMUSG00000024603	18	60685868	60718416
Rbm22	ENSMUSG00000024604	18	60720390	60732464
Myoz3	ENSMUSG00000049173	18	60735970	60751442
Synpo	ENSMUSG00000043079	18	60753627	60819796
Ndst1	ENSMUSG00000054008	18	60845632	60908304
Rps14	ENSMUSG00000024608	18	60934164	60938200
Cd74	ENSMUSG00000024610	18	60963502	60972300
Tcof1	ENSMUSG00000024613	18	60973409	61008625
Csnk1a1	ENSMUSG00000024576	18	61714928	61749715
Sh3tc2	ENSMUSG00000045629	18	62112729	62184019
Adrb2	ENSMUSG00000045730	18	62337471	62339613
Gm9949	ENSMUSG00000054589	18	62339780	62344059
Grpel2	ENSMUSG00000024580	18	61872094	61885985
Afap1l1	ENSMUSG00000033032	18	61889915	61946356
Ablim3	ENSMUSG00000032735	18	61959049	62071506
Slc26a2	ENSMUSG00000034320	18	61352573	61371266
Pde6a	ENSMUSG00000024575	18	61380136	61449578
Ppargc1b	ENSMUSG00000033871	18	61457790	61560085
Gm4841	ENSMUSG00000068606	18	60427959	60432926
Il17b	ENSMUSG00000024578	18	61847589	61852191
Pcyox1l	ENSMUSG00000024579	18	61856491	61867289
Gm6960	ENSMUSG00000073554	18	60585946	60586588
Gm8731	ENSMUSG00000080779	18	60938637	60939048
Rps2-ps10	ENSMUSG00000069367	18	61418734	61419615
[truncated: 290 more rows]

## Sheet: longevityIgG2b-FHA
Gene Name	Ensembl Gene ID	Chromosome	Start	End
Eif5b	ENSMUSG00000026083	1	38054855	38112424
Rev1	ENSMUSG00000026082	1	38109632	38186507
Aff3	ENSMUSG00000037138	1	38234171	38721800
Lonrf2	ENSMUSG00000048814	1	38850514	38892935
Chst10	ENSMUSG00000026080	1	38920722	38955005
Nms	ENSMUSG00000067604	1	38995994	39007123
Pdcl3	ENSMUSG00000026078	1	39044659	39054081
Npas2	ENSMUSG00000026077	1	39250576	39420079
Rpl31	ENSMUSG00000073702	1	39424696	39428753
Tbc1d8	ENSMUSG00000003134	1	39428344	39535592
D1Bwg0212e	ENSMUSG00000003135	1	39591837	39603726
Rnf149	ENSMUSG00000048234	1	39608141	39634250
Creg2	ENSMUSG00000050967	1	39675251	39708027
Rfx8	ENSMUSG00000057173	1	39722151	39777842
Gm3646	ENSMUSG00000091937	1	39861028	39861189
Map4k4	ENSMUSG00000026074	1	39957758	40083155
Gm16150	ENSMUSG00000085391	1	38292265	38303511
Gm16151	ENSMUSG00000085280	1	38364747	38368775
Gm16152	ENSMUSG00000087131	1	38441794	38450819
Gm20428	ENSMUSG00000092553	1	39333128	39333410
Gm3617	ENSMUSG00000092563	1	39371744	39372298
Gm15832	ENSMUSG00000085894	1	39604415	39608847
D930019O06Rik	ENSMUSG00000090677	1	39707021	39714235
SNORA33	ENSMUSG00000064936	1	39630591	39630720
Snord89	ENSMUSG00000077704	1	39605590	39605699
U3	ENSMUSG00000065629	1	39576378	39576591
Dnahc7b	ENSMUSG00000041144	1	46123583	46430395
Dnahc7c	ENSMUSG00000078595	1	46665806	46682956
Slc39a10	ENSMUSG00000025986	1	46864389	46910891
Gm4852	ENSMUSG00000081185	1	47422488	47423216
AC134426.1	ENSMUSG00000080510	1	47806123	47806243
7SK	ENSMUSG00000088017	1	47808143	47808412
n-R5s211	ENSMUSG00000070199	1	46431042	46431160
U1	ENSMUSG00000064943	1	48519017	48519137
AC122246.1	ENSMUSG00000092790	1	49152288	49152729
C230029F24Rik	ENSMUSG00000051616	1	49301460	49395090
Stat4	ENSMUSG00000062939	1	52043992	52164032
Gm3940	ENSMUSG00000078291	1	52147479	52147910
Stat1	ENSMUSG00000026104	1	52176282	52218704
Gls	ENSMUSG00000026103	1	52220292	52290076
Nab1	ENSMUSG00000002881	1	52514138	52557523
Tmem194b	ENSMUSG00000043015	1	52687549	52708763
Mfsd6	ENSMUSG00000041439	1	52713130	52784306
Inpp1	ENSMUSG00000026102	1	52846257	52874532
Hibch	ENSMUSG00000041426	1	52901857	52977830
1700019D03Rik	ENSMUSG00000043629	1	52979168	53020104
Mstn	ENSMUSG00000026100	1	53118507	53124923
1700019A02Rik	ENSMUSG00000060715	1	53215421	53244461
Pms1	ENSMUSG00000026098	1	53246031	53353862
Ormdl1	ENSMUSG00000026097	1	53353939	53367153
Osgepl1	ENSMUSG00000026096	1	53370468	53383187
Asnsd1	ENSMUSG00000026095	1	53382351	53409596
Dnahc7a	ENSMUSG00000067440	1	53604023	53622541
Stk17b	ENSMUSG00000026094	1	53812350	53842068
Hecw2	ENSMUSG00000042807	1	53863726	54252012
Gm16107	ENSMUSG00000089802	1	52929981	52930842
SNORA17	ENSMUSG00000089334	1	53156894	53156994
U1	ENSMUSG00000087949	1	53943672	53943785
U6	ENSMUSG00000065192	1	52501280	52501388
AC122925.1	ENSMUSG00000092657	1	53500115	53500239
SNORA17	ENSMUSG00000089037	1	111519585	111519714
7SK	ENSMUSG00000084741	1	111701337	111701621
Xirp2	ENSMUSG00000027022	2	67284059	67364671
F830016D02Rik	ENSMUSG00000067582	2	67269281	67271973
B3galt1	ENSMUSG00000034780	2	67942728	67960746
Stk39	ENSMUSG00000027030	2	68048502	68310325
4933409G03Rik	ENSMUSG00000053896	2	68420470	68454444
4932414N04Rik	ENSMUSG00000079324	2	68494543	68586522
Gm13600	ENSMUSG00000081973	2	66701319	66702832
Gm13602	ENSMUSG00000082218	2	66780615	66781107
Gm13598	ENSMUSG00000086908	2	66995703	67032792
Gm1322	ENSMUSG00000075314	2	67011891	67023007
Gm13599	ENSMUSG00000087043	2	67147716	67234548
Gm13601	ENSMUSG00000087467	2	67329101	67354582
Gm13604	ENSMUSG00000083910	2	67545347	67545828
Gm13603	ENSMUSG00000081299	2	67604034	67604116
Gm13607	ENSMUSG00000081257	2	67919848	67920386
Gm13606	ENSMUSG00000081899	2	67973721	67974669
Gm13596	ENSMUSG00000085182	2	68314139	68315809
Gm13597	ENSMUSG00000075312	2	68392558	68393807
Gm13612	ENSMUSG00000082836	2	68669074	68669463
SNORA17	ENSMUSG00000088043	2	67258088	67258219
7SK	ENSMUSG00000088365	2	68322200	68322441
Lass6	ENSMUSG00000027035	2	68699498	68952339
Zfp106	ENSMUSG00000027288	2	120332556	120389579
Chac1	ENSMUSG00000027313	2	119176965	119180117
Epb4.2	ENSMUSG00000023216	2	120843627	120862808
Snap23	ENSMUSG00000027287	2	120393407	120426991
Ino80	ENSMUSG00000034154	2	119198778	119303423
Exd1	ENSMUSG00000048647	2	119342241	119373363
1500003O03Rik	ENSMUSG00000014077	2	119373433	119412763
Oip5	ENSMUSG00000072980	2	119435248	119444205
Nusap1	ENSMUSG00000027306	2	119444034	119476980
Ndufaf1	ENSMUSG00000027305	2	119481182	119488563
Rtf1	ENSMUSG00000027304	2	119500804	119561143
Itpka	ENSMUSG00000027296	2	119568073	119576999
Ltk	ENSMUSG00000027297	2	119577056	119586167
Rpap1	ENSMUSG00000034032	2	119589040	119613273
Tyro3	ENSMUSG00000027298	2	119623469	119643840
Lrrc57	ENSMUSG00000027286	2	120429974	120435256
Haus2	ENSMUSG00000027285	2	120435119	120447296
Stard9	ENSMUSG00000033705	2	120454862	120557633
Ganc	ENSMUSG00000062646	2	120229632	120287436
Capn3	ENSMUSG00000079110	2	120281755	120330649
Tgm5	ENSMUSG00000053675	2	120871847	120911577
Tgm7	ENSMUSG00000079103	2	120919301	120935531
Gm17675	ENSMUSG00000091714	2	120358640	120365582
Gm14138	ENSMUSG00000081572	2	119013253	119013997
Gm14175	ENSMUSG00000084015	2	119110528	119110768
Gm14207	ENSMUSG00000074912	2	119146923	119151930
Gm14208	ENSMUSG00000082369	2	119334288	119334965
1700020I14Rik	ENSMUSG00000085438	2	119420033	119433238
H3f3c	ENSMUSG00000082029	2	119491362	119491772
Gm14383	ENSMUSG00000081416	2	119494895	119495280
Gm13998	ENSMUSG00000081056	2	119703805	119704139
Gm13999	ENSMUSG00000087458	2	119850543	119853189
Gm13997	ENSMUSG00000087555	2	120070657	120071334
Gm14087	ENSMUSG00000081105	2	120376355	120376494
AV039307	ENSMUSG00000087519	2	120676441	120692425
Gm14213	ENSMUSG00000081313	2	120875535	120876302
Gm17647	ENSMUSG00000091181	2	120308157	120308472
Tmem87a	ENSMUSG00000033808	2	120181045	120229852
Rad51	ENSMUSG00000027323	2	118938529	118973181
Fam82a2	ENSMUSG00000070730	2	118962737	118982770
Gchfr	ENSMUSG00000046814	2	118993509	118998126
Dnajc17	ENSMUSG00000034278	2	118998236	119034531
Gm14137	ENSMUSG00000055926	2	119000245	119003311
Zfyve19	ENSMUSG00000068580	2	119034353	119042785
Ppp1r14d	ENSMUSG00000027317	2	119043855	119055642
Spint1	ENSMUSG00000027315	2	119063098	119075263
Rhov	ENSMUSG00000034226	2	119094937	119097008
Vps18	ENSMUSG00000034216	2	119114476	119124189
Dll4	ENSMUSG00000027314	2	119151520	119161698
Pla2g4b	ENSMUSG00000033852	2	119853219	119868769
Spnb5	ENSMUSG00000074899	2	119871893	119911508
Ehd4	ENSMUSG00000027293	2	119914911	119980342
Pla2g4e	ENSMUSG00000050211	2	119992148	120071071
Pla2g4d	ENSMUSG00000070719	2	120091331	120114933
Pla2g4f	ENSMUSG00000046971	2	120125693	120139901
Vps39	ENSMUSG00000027291	2	120142197	120178873
Mga	ENSMUSG00000033943	2	119722964	119795317
Mapkbp1	ENSMUSG00000033902	2	119798435	119853144
Ttbk2	ENSMUSG00000090100	2	120558552	120676340
Ubr1	ENSMUSG00000027272	2	120686005	120796451
Cdan1	ENSMUSG00000027284	2	120541890	120675864
Tmem62	ENSMUSG00000054484	2	120802753	120833588
Ccndbp1	ENSMUSG00000023572	2	120834139	120842640
n-R5s205	ENSMUSG00000065083	2	120466447	120466571
U6	ENSMUSG00000065164	2	119619678	119619779
n-R5s204	ENSMUSG00000064906	2	119456854	119456972
U3	ENSMUSG00000065883	2	120829825	120830037
SNORA44	ENSMUSG00000064722	2	119566564	119566692
Prokr2	ENSMUSG00000050558	2	132163469	132211183
Rassf2	ENSMUSG00000027339	2	131815151	131855994
Prnd	ENSMUSG00000027338	2	131735693	131781866
Ubox5	ENSMUSG00000027300	2	130415738	130455774
Fastkd5	ENSMUSG00000079043	2	130439576	130455763
Prosapip1	ENSMUSG00000037703	2	130458575	130468539
Ddrgk1	ENSMUSG00000068290	2	130479696	130490395
Itpa	ENSMUSG00000074797	2	130493346	130507350
Slc4a11	ENSMUSG00000074796	2	130509849	130523255
Atrn	ENSMUSG00000027312	2	130732231	130856069
4930402H24Rik	ENSMUSG00000027309	2	130531936	130732142
Adra1d	ENSMUSG00000027335	2	131371586	131388021
4930425F17Rik	ENSMUSG00000062501	2	131473561	131474330
Erv3	ENSMUSG00000037482	2	131679414	131685483
Prnp	ENSMUSG00000079037	2	131735664	131764165
Gfra4	ENSMUSG00000027316	2	130865368	130868824
Adam33	ENSMUSG00000027318	2	130876327	130889550
5730494N06Rik	ENSMUSG00000027341	2	132065228	132073543
Gm14057	ENSMUSG00000089662	2	130629237	130629718
A730017L22Rik	ENSMUSG00000085566	2	130698795	130732132
Gm14048	ENSMUSG00000080989	2	130706602	130707869
Gm14049	ENSMUSG00000083953	2	130813720	130814355
Gm14232	ENSMUSG00000087405	2	130985273	130997078
Gm14233	ENSMUSG00000086329	2	131124281	131125571
Gm14284	ENSMUSG00000082044	2	131147824	131148102
Gm14283	ENSMUSG00000081652	2	131240657	131240981
Gm14304	ENSMUSG00000083671	2	131279864	131280376
Gm14285	ENSMUSG00000087524	2	131387350	131388915
Gm14280	ENSMUSG00000086831	2	131478633	131547574
5330413P13Rik	ENSMUSG00000086822	2	131645742	131673396
Gm14282	ENSMUSG00000081422	2	131671092	131671331
Gm14281	ENSMUSG00000083469	2	131672131	131673424
Lamr1-ps1	ENSMUSG00000081229	2	131729822	131730695
Gm14052	ENSMUSG00000082990	2	131925605	131926635
Gm14051	ENSMUSG00000086756	2	131970269	132045986
AV099323	ENSMUSG00000087377	2	132079093	132087069
4921508D12Rik	ENSMUSG00000027345	2	132250477	132278235
Gm14095	ENSMUSG00000086250	2	132308948	132326884
1700026D11Rik	ENSMUSG00000086379	2	132316370	132349793
Gpcpd1	ENSMUSG00000027346	2	132354818	132413465
Slc23a2	ENSMUSG00000027340	2	131878232	131970844
Siglec1	ENSMUSG00000027322	2	130894956	130912501
Hspa12b	ENSMUSG00000074793	2	130953016	130972057
Gm11037	ENSMUSG00000079039	2	130959233	130959951
1700037H04Rik	ENSMUSG00000027327	2	130972060	130985817
Spef1	ENSMUSG00000027329	2	130995997	131013018
Cenpb	ENSMUSG00000068267	2	131000918	131005803
Cdc25b	ENSMUSG00000027330	2	131012685	131024233
2310035K24Rik	ENSMUSG00000068264	2	131032814	131039250
Mavs	ENSMUSG00000037523	2	131059799	131073761
Pank2	ENSMUSG00000037514	2	131088231	131124924
Rnf24	ENSMUSG00000048911	2	131123800	131178628
Smox	ENSMUSG00000027333	2	131317232	131351658
Pcna	ENSMUSG00000027342	2	132074898	132079050
Cds2	ENSMUSG00000058793	2	132088884	132137786
7SK	ENSMUSG00000084694	2	130531064	130531432
RNaseP_nuc	ENSMUSG00000089113	2	131239397	131239698
AL831731.1	ENSMUSG00000092654	2	131393747	131393818
Mir103-2	ENSMUSG00000065563	2	131113788	131113873
1110034G24Rik	ENSMUSG00000044991	2	132512667	132576791
AU019990	ENSMUSG00000074783	2	132423931	132478804
Rpl23a-ps4	ENSMUSG00000081445	2	132487978	132488432
Gm14099	ENSMUSG00000084089	2	132499121	132499725
Gm14098	ENSMUSG00000081662	2	132504005	132504975
Gm14097	ENSMUSG00000084839	2	132520168	132524259
U6	ENSMUSG00000064413	2	132542842	132542944
C230034O21Rik	ENSMUSG00000086181	3	38773492	38787181
Gm9845	ENSMUSG00000050533	3	39257180	39257827
Ankrd50	ENSMUSG00000044864	3	38348183	38383766
Fat4	ENSMUSG00000046743	3	38785862	38910907
SNORA17	ENSMUSG00000089520	3	39698554	39698638
n-R5s195	ENSMUSG00000064825	3	39534886	39535004
AC162799.1	ENSMUSG00000092986	3	38166760	38167006
U1	ENSMUSG00000065945	3	39565210	39565369
AC114901.1	ENSMUSG00000076385	3	38457031	38457136
Gm10356	ENSMUSG00000072387	3	46854304	46855563
Pcdh10	ENSMUSG00000049100	3	45182320	45238488
Pabpc4l	ENSMUSG00000090919	3	46246119	46251863
2610316D01Rik	ENSMUSG00000086101	3	45084362	45182182
U1	ENSMUSG00000064579	3	45621658	45621820
SNORA17	ENSMUSG00000088739	3	47004549	47004686
U6	ENSMUSG00000089584	3	45782500	45782617
SNORA17	ENSMUSG00000077256	3	46093755	46093886
Gm17359	ENSMUSG00000091685	3	79149298	79268051
Fnip2	ENSMUSG00000061175	3	79259893	79371718
4930589L23Rik	ENSMUSG00000068957	3	79372114	79376502
Ppid	ENSMUSG00000027804	3	79395264	79407572
Etfdh	ENSMUSG00000027809	3	79407710	79432785
4930579G24Rik	ENSMUSG00000027811	3	79433001	79436739
Rxfp1	ENSMUSG00000034009	3	79448638	79541716
Tmem144	ENSMUSG00000027956	3	79617070	79646584
Fam198b	ENSMUSG00000027955	3	79688455	79750202
Gria2	ENSMUSG00000033981	3	80488858	80606713
Glrb	ENSMUSG00000028020	3	80647521	80717582
Gm17731	ENSMUSG00000091291	3	80719733	80721354
Pdgfc	ENSMUSG00000028019	3	80840338	81017962
Gm3513	ENSMUSG00000089746	3	79355236	79356115
Gm6706	ENSMUSG00000087123	3	80203271	80203588
Gm16000	ENSMUSG00000085106	3	80841330	80844359
U6	ENSMUSG00000077461	3	79638855	79638957
AC163349.1	ENSMUSG00000093226	3	80496125	80496235
SNORA17	ENSMUSG00000089444	3	81684649	81684788
Gm9989	ENSMUSG00000056023	3	81725190	81728385
Ctso	ENSMUSG00000028015	3	81736523	81760647
Tdo2	ENSMUSG00000028011	3	81761012	81780124
Accn5	ENSMUSG00000028008	3	81786212	81825155
Gucy1b3	ENSMUSG00000028005	3	81835926	81878633
Gucy1a3	ENSMUSG00000033910	3	81896350	81949799
Mtap9	ENSMUSG00000033900	3	82161994	82199190
Npy2r	ENSMUSG00000028004	3	82342305	82352008
Rbm46	ENSMUSG00000033882	3	82641155	82680405
Lrat	ENSMUSG00000028003	3	82696501	82707895
Fgg	ENSMUSG00000033860	3	82811781	82818975
Fga	ENSMUSG00000028001	3	82830075	82838036
Fgb	ENSMUSG00000033831	3	82846169	82853725
4930564K09Rik	ENSMUSG00000086273	3	82680627	82747560
Plrg1	ENSMUSG00000027998	3	82859444	82876277
Gm10710	ENSMUSG00000074517	3	82929198	82933168
7SK	ENSMUSG00000087902	3	82597578	82597819
Gm3788	ENSMUSG00000091955	3	86475690	86476166
Gm10705	ENSMUSG00000074506	3	87011463	87011927
Lmna	ENSMUSG00000028063	3	88285070	88313878
Tmem79	ENSMUSG00000001420	3	88132577	88138426
Rhbg	ENSMUSG00000001417	3	88046796	88091132
Prcc	ENSMUSG00000004895	3	87662822	87689530
Smg5	ENSMUSG00000001415	3	88140182	88166259
Paqr6	ENSMUSG00000041423	3	88168506	88172463
Bglap-rs1	ENSMUSG00000074489	3	88172538	88176665
Bglap2	ENSMUSG00000074486	3	88181658	88182621
Gm6821	ENSMUSG00000078691	3	88184926	88186733
Bglap	ENSMUSG00000074483	3	88187423	88188386
Pmf1	ENSMUSG00000028066	3	88198061	88214238
Slc25a44	ENSMUSG00000050144	3	88214420	88229061
Sema4a	ENSMUSG00000028064	3	88239881	88265104
Hdgf	ENSMUSG00000004897	3	87710243	87720054
Mrpl24	ENSMUSG00000019710	3	87723428	87727594
Rrnad1	ENSMUSG00000004896	3	87726523	87734639
Isg20l2	ENSMUSG00000048039	3	87734236	87744608
Crabp2	ENSMUSG00000004885	3	87752588	87757298
Nes	ENSMUSG00000004891	3	87775000	87784373
Bcan	ENSMUSG00000004892	3	87791453	87804278
Hapln2	ENSMUSG00000004894	3	87825672	87831505
Gpatch4	ENSMUSG00000028069	3	87847030	87859915
Apoa1bp	ENSMUSG00000028070	3	87860445	87862417
Ttc24	ENSMUSG00000051036	3	87873332	87882226
Iqgap3	ENSMUSG00000028068	3	87885973	87924970
Mef2d	ENSMUSG00000001419	3	87946294	87976008
Gm17285	ENSMUSG00000090826	3	88081022	88081376
1700021C14Rik	ENSMUSG00000010538	3	88084043	88100921
Cct3	ENSMUSG00000001416	3	88101038	88125689
0610031J06Rik	ENSMUSG00000001418	3	88128945	88135235
Ntrk1	ENSMUSG00000028072	3	87582166	87599084
Insrr	ENSMUSG00000005640	3	87600873	87620023
Sh2d2a	ENSMUSG00000028071	3	87650677	87659644
Mab21l2	ENSMUSG00000057777	3	86349503	86352205
Dclk2	ENSMUSG00000028078	3	86590073	86724803
Cd1d2	ENSMUSG00000041750	3	86790508	86793455
Cd1d1	ENSMUSG00000028076	3	86799756	86803363
Kirrel	ENSMUSG00000041734	3	86882515	86978669
Fcrls	ENSMUSG00000015852	3	87054680	87067660
Cd5l	ENSMUSG00000015854	3	87161803	87174996
Fcrl1	ENSMUSG00000059994	3	87180309	87196055
Fcrl5	ENSMUSG00000048031	3	87239807	87261758
Etv3	ENSMUSG00000003382	3	87329329	87344078
Arhgef11	ENSMUSG00000041977	3	87421481	87541956
Gm6570	ENSMUSG00000060209	3	87483528	87483991
4933430H15Rik	ENSMUSG00000023084	3	87540845	87552547
Pear1	ENSMUSG00000028073	3	87551812	87628181
Lrba	ENSMUSG00000028080	3	86028602	86586615
Mex3a	ENSMUSG00000074480	3	88336317	88345318
Rab25	ENSMUSG00000008601	3	88345951	88352222
1700113A16Rik	ENSMUSG00000086082	3	87975482	87981707
AW047730	ENSMUSG00000091886	3	88004545	88007403
Gm3764	ENSMUSG00000091070	3	88018407	88025782
AC139241.1	ENSMUSG00000093230	3	87421321	87421423
SNORA17	ENSMUSG00000077672	3	86870815	86870946
U1	ENSMUSG00000064872	3	86734665	86734824
Mir3093	ENSMUSG00000092988	3	88019093	88019179
SNORA17	ENSMUSG00000077376	3	87386594	87386713
Mir1905	ENSMUSG00000084728	3	88340223	88340304
AC044864.1	ENSMUSG00000092876	3	88019511	88019618
Rwdd3	ENSMUSG00000028133	3	120858318	120874613
Tmem56	ENSMUSG00000028132	3	120904679	120986016
Alg14	ENSMUSG00000039887	3	120994735	121064929
Cnn3	ENSMUSG00000053931	3	121129459	121161123
Slc44a3	ENSMUSG00000039865	3	121162447	121235262
A730020M07Rik	ENSMUSG00000044522	3	121340063	121346403
4930432M17Rik	ENSMUSG00000074248	3	121374235	121385753
F3	ENSMUSG00000028128	3	121426455	121437970
Abcd3	ENSMUSG00000028127	3	121461827	121518220
Gm17676	ENSMUSG00000091716	3	121499382	121499550
Arhgap29	ENSMUSG00000039831	3	121656147	121719595
Abca4	ENSMUSG00000028125	3	121747361	121882979
Gm4609	ENSMUSG00000078592	3	121933113	121934114
Gclm	ENSMUSG00000028124	3	121948475	121972902
Dnttip2	ENSMUSG00000039756	3	121977332	121988187
Bcar3	ENSMUSG00000028121	3	122122698	122233098
Fnbp1l	ENSMUSG00000039735	3	122241637	122322585
Pde5a	ENSMUSG00000053965	3	122432076	122562292
Fabp2	ENSMUSG00000023057	3	122597990	122602424
Gm10959	ENSMUSG00000078590	3	122615988	122622278
1810037I17Rik	ENSMUSG00000054091	3	122627280	122629111
Usp53	ENSMUSG00000039701	3	122636519	122687422
Myoz2	ENSMUSG00000028116	3	122709124	122737908
Synpo2	ENSMUSG00000050315	3	122779437	122939067
Gm16078	ENSMUSG00000084912	3	121757668	121758466
RP23-71G16.1	ENSMUSG00000093392	3	121959646	121960137
Gm17494	ENSMUSG00000057359	3	121960009	121996465
Gm9364	ENSMUSG00000091611	3	122564802	122565594
A530020G20Rik	ENSMUSG00000086471	3	121234529	121238356
4933405D12Rik	ENSMUSG00000086397	3	122567655	122627034
AC110195.1	ENSMUSG00000093177	3	120933178	120933248
Mir760	ENSMUSG00000076456	3	121996503	121996621
AC121540.1	ENSMUSG00000076949	3	122718177	122718286
U1	ENSMUSG00000087743	3	122167645	122167800
AC134918.1	ENSMUSG00000092934	3	121935453	121935554
7SK	ENSMUSG00000084674	3	121040610	121040877
Lmo4	ENSMUSG00000028266	3	143851494	143868184
Hs2st1	ENSMUSG00000040151	3	144094067	144233145
Sep15	ENSMUSG00000037072	3	144233268	144260644
Sh3glb1	ENSMUSG00000037062	3	144347972	144383287
Clca1	ENSMUSG00000056025	3	144392641	144423941
Clca2	ENSMUSG00000028262	3	144459523	144482458
Clca4	ENSMUSG00000037033	3	144485587	144512321
Gm6289	ENSMUSG00000074196	3	144542286	144558975
AI747448	ENSMUSG00000074195	3	144573885	144595493
Clca6	ENSMUSG00000068547	3	144615444	144638009
Clca3	ENSMUSG00000028255	3	144667501	144695740
Clca5	ENSMUSG00000036960	3	144733229	144762068
Odf2l	ENSMUSG00000028256	3	144781553	144816879
Gm16215	ENSMUSG00000089950	3	144510538	144510967
Gm16233	ENSMUSG00000085773	3	144610525	144617842
SNORA2	ENSMUSG00000064960	3	144249789	144249916
SNORA4	ENSMUSG00000088851	3	143337907	143338031
4930455G09Rik	ENSMUSG00000085761	4	141573813	141584911
Gm13053	ENSMUSG00000085574	4	141598827	141604493
Sdhb	ENSMUSG00000009863	4	140517118	140535108
Atp13a2	ENSMUSG00000036622	4	140542788	140563245
Mfap2	ENSMUSG00000060572	4	140566333	140571899
Crocc	ENSMUSG00000040860	4	140572552	140616465
Necap2	ENSMUSG00000028923	4	140622427	140634272
Spata21	ENSMUSG00000045004	4	140644248	140668675
D4Ertd22e	ENSMUSG00000040842	4	140668916	140695690
Fbxo42	ENSMUSG00000028920	4	140703828	140759977
6330545A04Rik	ENSMUSG00000073733	4	140769871	140782671
C630004L07Rik	ENSMUSG00000091674	4	140794100	140795368
Arhgef19	ENSMUSG00000028919	4	140795490	140813479
Epha2	ENSMUSG00000006445	4	140857155	140885299
Fam131c	ENSMUSG00000006218	4	140924135	140940090
Clcnka	ENSMUSG00000033770	4	140940525	140954639
Clcnkb	ENSMUSG00000006216	4	140960268	140971929
Hspb7	ENSMUSG00000006221	4	140976694	140981226
Gm694	ENSMUSG00000070637	4	140988587	140992020
Zbtb17	ENSMUSG00000006215	4	141000569	141023845
Spen	ENSMUSG00000040761	4	141023805	141094512
Fblim1	ENSMUSG00000006219	4	141131977	141162011
Gm13047	ENSMUSG00000082246	4	140640779	140641593
Gm13055	ENSMUSG00000085774	4	140817677	140821931
Gm13056	ENSMUSG00000085395	4	140834354	140835709
Gm13074	ENSMUSG00000085836	4	140903729	140906768
Gm13076	ENSMUSG00000084238	4	140912803	140913006
Gm13075	ENSMUSG00000086061	4	140954744	140967106
B330016D10Rik	ENSMUSG00000048406	4	141102104	141103807
AI507597	ENSMUSG00000073731	4	141169941	141171519
1810035I16Rik	ENSMUSG00000086818	4	141400236	141402905
Gm13643	ENSMUSG00000085922	4	141441569	141453197
Gm13059	ENSMUSG00000081079	4	141532694	141533258
Gm13037	ENSMUSG00000085424	4	141538907	141542712
Gm10565	ENSMUSG00000073728	4	141639887	141644014
Gm13062	ENSMUSG00000087525	4	141736517	141740054
Gm13052	ENSMUSG00000085816	4	141863680	141902390
Gm13018	ENSMUSG00000082201	4	142147293	142147739
Tmem82	ENSMUSG00000043085	4	141169291	141174548
Slc25a34	ENSMUSG00000040740	4	141174739	141179736
Plekhm2	ENSMUSG00000028917	4	141181649	141220814
Ddi2	ENSMUSG00000078515	4	141233464	141279334
Rsc1a1	ENSMUSG00000040715	4	141239766	141241514
Agmat	ENSMUSG00000040706	4	141302587	141315178
Dnajc16	ENSMUSG00000040697	4	141316104	141346846
Casp9	ENSMUSG00000028914	4	141349527	141371891
Ctrc	ENSMUSG00000062478	4	141370877	141402274
Cela2a	ENSMUSG00000058579	4	141370877	141382075
Efhd2	ENSMUSG00000040659	4	141414057	141430835
Fhad1	ENSMUSG00000051435	4	141446353	141570997
Tmem51	ENSMUSG00000040616	4	141586907	141640219
Kazn	ENSMUSG00000040606	4	141658305	141795316
4921514A10Rik	ENSMUSG00000091088	4	140671575	140674002
AL670285.1	ENSMUSG00000093180	4	140902079	140902155
Gm13038	ENSMUSG00000081838	4	142742475	142742933
Gm13039	ENSMUSG00000083826	4	142756506	142757299
Prdm2	ENSMUSG00000057637	4	142697294	142802898
SNORA17	ENSMUSG00000087903	4	142793968	142794099
Magi2	ENSMUSG00000040003	5	18732864	20210616
Magi2	ENSMUSG00000067798	5	20045708	20046222
Magi2	ENSMUSG00000073174	5	20208095	20211867
Phtf2	ENSMUSG00000039987	5	20264481	20387942
Tmem60	ENSMUSG00000045435	5	20388009	20392688
Rsbn1l	ENSMUSG00000039968	5	20398846	20457640
Ptpn12	ENSMUSG00000028771	5	20492463	20561729
Pion	ENSMUSG00000039934	5	20692085	20797519
Ccdc146	ENSMUSG00000064280	5	20798779	20930495
Fgl2	ENSMUSG00000039899	5	20878460	20884192
Fam185a	ENSMUSG00000047221	5	20930776	20987942
Fbxl13	ENSMUSG00000048520	5	20989665	21151423
Lrrc17	ENSMUSG00000039883	5	21049345	21081718
Gm6543	ENSMUSG00000054284	5	21104697	21105368
Armc10	ENSMUSG00000038525	5	21151631	21168512
Napepld	ENSMUSG00000044968	5	21168719	21207214
Pmpcb	ENSMUSG00000029017	5	21242959	21262970
Dnajc2	ENSMUSG00000029014	5	21263085	21291069
Psmc2	ENSMUSG00000028932	5	21291101	21309605
Slc26a5	ENSMUSG00000029015	5	21316473	21371422
Reln	ENSMUSG00000042453	5	21390272	21850523
Rpl31-ps5	ENSMUSG00000082716	5	20311908	20312282
Gm15719	ENSMUSG00000081242	5	21195359	21195993
Gm15715	ENSMUSG00000083006	5	21254049	21254331
Gm16111	ENSMUSG00000090008	5	21395598	21395882
Gm10475	ENSMUSG00000073152	5	21416749	21459832
Dnaja1-ps	ENSMUSG00000090197	5	21457676	21458317
U6	ENSMUSG00000087768	5	19770159	19770258
SNORA40	ENSMUSG00000087813	5	20622901	20623019
Cryba4	ENSMUSG00000066975	5	112675513	112681538
Crybb1	ENSMUSG00000029343	5	112684835	112698605
Tpst2	ENSMUSG00000029344	5	112705711	112744381
Tfip11	ENSMUSG00000029345	5	112755378	112767093
Srrd	ENSMUSG00000029346	5	112766412	112772060
Hps4	ENSMUSG00000042328	5	112772103	112807434
Gm6583	ENSMUSG00000051503	5	112782821	112785053
Asphd2	ENSMUSG00000029348	5	112814468	112821233
Sez6l	ENSMUSG00000058153	5	112848180	113006205
Gm6588	ENSMUSG00000072722	5	112878446	112880758
Myo18b	ENSMUSG00000072720	5	113117896	113325382
Adrbk2	ENSMUSG00000042249	5	113339498	113444811
Crybb2	ENSMUSG00000042240	5	113487278	113499137
Crybb3	ENSMUSG00000029352	5	113504859	113510604
2900026A02Rik	ENSMUSG00000051339	5	113515343	113592371
Tmem211	ENSMUSG00000066964	5	113655929	113668283
Sgsm1	ENSMUSG00000042216	5	113672240	113739806
Aym1	ENSMUSG00000053873	5	113786314	113786841
Wscd2	ENSMUSG00000063430	5	113919467	114039679
Cmklr1	ENSMUSG00000042190	5	114062363	114100435
1700069L16Rik	ENSMUSG00000042184	5	114142431	114174781
Ficd	ENSMUSG00000053334	5	114185791	114190609
Sart3	ENSMUSG00000018974	5	114192455	114221658
Gm3511	ENSMUSG00000069196	5	114217108	114217421
Iscu	ENSMUSG00000025825	5	114222757	114228297
Tmem119	ENSMUSG00000054675	5	114243738	114250525
RP23-459I1.1	ENSMUSG00000093637	5	112803389	112806659
Wscd2	ENSMUSG00000085571	5	113919772	113919960
Gm15736	ENSMUSG00000085713	5	114094972	114095691
Miat	ENSMUSG00000086878	5	112642248	112657968
AC151577.1	ENSMUSG00000093343	5	113690296	113690368
U6	ENSMUSG00000065373	5	113473164	113473272
Selplg	ENSMUSG00000048163	5	114267807	114280510
Coro1c	ENSMUSG00000004530	5	114292445	114358767
Ssh1	ENSMUSG00000042121	5	114387103	114443903
Dao	ENSMUSG00000042096	5	114453712	114475458
Svop	ENSMUSG00000042078	5	114476919	114541579
Usp30	ENSMUSG00000029592	5	114550342	114573515
Alkbh2	ENSMUSG00000044339	5	114573935	114578227
Ung	ENSMUSG00000029591	5	114580395	114589332
Acacb	ENSMUSG00000042010	5	114596544	114700770
Foxn4	ENSMUSG00000042002	5	114704173	114723816
Myo1h	ENSMUSG00000066952	5	114764950	114814585
Kctd10	ENSMUSG00000001098	5	114813576	114830524
Ube3b	ENSMUSG00000029577	5	114830637	114871177
Gm17122	ENSMUSG00000090458	5	114292610	114293125
Gm16108	ENSMUSG00000089734	5	114515470	114539475
Gm13784	ENSMUSG00000084243	5	114687185	114687934
Gm13789	ENSMUSG00000085590	5	114813424	114815366
U6	ENSMUSG00000065320	5	114378733	114378813
Aass	ENSMUSG00000029695	6	23022173	23082986
Fezf1	ENSMUSG00000029697	6	23195047	23198264
Cadps2	ENSMUSG00000017978	6	23212773	23789421
Rnf133	ENSMUSG00000051956	6	23598869	23600305
Rnf148	ENSMUSG00000078179	6	23603898	23605136
Tas2r118	ENSMUSG00000043865	6	23919161	23920060
Slc13a1	ENSMUSG00000029700	6	24038283	24118092
Iqub	ENSMUSG00000046192	6	24394865	24465067
Ndufa5	ENSMUSG00000023089	6	24468666	24478013
Asb15	ENSMUSG00000029685	6	24478144	24523164
Gm17303	ENSMUSG00000091097	6	24509557	24512070
Lmod2	ENSMUSG00000029683	6	24547771	24555414
Wasl	ENSMUSG00000029684	6	24563805	24615009
Hyal6	ENSMUSG00000029679	6	24683245	24695452
Hyal4	ENSMUSG00000029680	6	24698329	24717662
Spam1	ENSMUSG00000029682	6	24745824	24751048
Hyal5	ENSMUSG00000029678	6	24825871	24841958
Tmem229a	ENSMUSG00000048022	6	24901141	24906297
Gm5989	ENSMUSG00000071564	6	23107986	23110061
Gm5301	ENSMUSG00000071563	6	23115338	23117413
RP23-313A2.3	ENSMUSG00000093580	6	24088341	24090363
Tmem229a	ENSMUSG00000090045	6	24904838	24905740
SNORA17	ENSMUSG00000087867	6	25028772	25028903
5S_rRNA	ENSMUSG00000088885	6	23589824	23589956
AC132439.1	ENSMUSG00000093255	6	24093368	24093468
SNORA17	ENSMUSG00000077196	6	24844670	24844800
Gm15864	ENSMUSG00000087136	6	82000447	82002575
Gm17034	ENSMUSG00000090293	6	82714276	82717282
Gm15605	ENSMUSG00000087578	6	83056602	83059048
Gm15624	ENSMUSG00000085782	6	83116146	83122727
B230319C09Rik	ENSMUSG00000051844	6	83391749	83398316
Slc4a5	ENSMUSG00000068323	6	83169822	83254939
Mthfd2	ENSMUSG00000005667	6	83255685	83267600
Mob1a	ENSMUSG00000043131	6	83276010	83293770
Bola3	ENSMUSG00000045160	6	83299141	83310130
Tet3	ENSMUSG00000034832	6	83312367	83391672
Dguok	ENSMUSG00000014554	6	83430211	83456963
Actg2	ENSMUSG00000059430	6	83462899	83486259
Aup1	ENSMUSG00000068328	6	83004647	83007674
Dqx1	ENSMUSG00000009145	6	83007838	83017204
Tlx2	ENSMUSG00000068327	6	83018311	83020287
Pcgf1	ENSMUSG00000069678	6	83027863	83030849
Lbx2	ENSMUSG00000034968	6	83036359	83038237
Ccdc142	ENSMUSG00000079511	6	83051611	83059933
Mrpl53	ENSMUSG00000030037	6	83059089	83059933
Mogs	ENSMUSG00000030036	6	83065490	83068892
Wbp1	ENSMUSG00000030035	6	83069038	83071553
Ino80b	ENSMUSG00000030034	6	83071759	83075425
Stambp	ENSMUSG00000006906	6	83493200	83522498
AW146020	ENSMUSG00000035125	6	81873663	81909909
Mrpl19	ENSMUSG00000030045	6	81907845	81915952
Fam176a	ENSMUSG00000035104	6	81991037	82043093
Tacr1	ENSMUSG00000030043	6	82352328	82510097
Pole4	ENSMUSG00000030042	6	82568986	82655359
Hk2	ENSMUSG00000000628	6	82675019	82724448
Sema4f	ENSMUSG00000000627	6	82861879	82889763
Rtkn	ENSMUSG00000034930	6	83085457	83102573
Wdr54	ENSMUSG00000030032	6	83099355	83106391
1700003E16Rik	ENSMUSG00000030030	6	83106398	83112969
Dctn1	ENSMUSG00000031865	6	83115914	83150111
D6Mm5e	ENSMUSG00000030041	6	82896896	82980177
Dok1	ENSMUSG00000068335	6	82980928	82983465
Loxl3	ENSMUSG00000000693	6	82984167	83002556
Htra2	ENSMUSG00000068329	6	83001260	83005267
Mir3470a	ENSMUSG00000092964	6	83040305	83040381
U1	ENSMUSG00000065212	6	81588305	81588463
SNORA17	ENSMUSG00000089445	6	81756785	81756902
AC090648.1	ENSMUSG00000080449	6	83458648	83458739
Vax2os2	ENSMUSG00000092177	6	83642800	83662195
Vax2os1	ENSMUSG00000085794	6	83650151	83660926
Clec4f	ENSMUSG00000014542	6	83594536	83606181
Cd207	ENSMUSG00000034783	6	83621201	83627851
Vax2	ENSMUSG00000034777	6	83661258	83688298
Atp6v1b1	ENSMUSG00000006269	6	83693011	83708803
Ankrd53	ENSMUSG00000014747	6	83712638	83718320
Tex261	ENSMUSG00000014748	6	83718875	83725806
Nagk	ENSMUSG00000034744	6	83744976	83753414
Paip2b	ENSMUSG00000045896	6	83755395	83781735
Gm5138	ENSMUSG00000079501	6	83824193	83825421
U6	ENSMUSG00000087995	6	83671290	83671386
SNORA17	ENSMUSG00000077332	6	83786931	83787060
7SK	ENSMUSG00000088031	6	83541815	83542137
Zfml	ENSMUSG00000030016	6	83864347	83936863
Gm15475	ENSMUSG00000087001	6	84051200	84056996
Dysf	ENSMUSG00000033788	6	83958584	84161054
Cyp26b1	ENSMUSG00000063415	6	84521938	84543740
Exoc6b	ENSMUSG00000033769	6	84568480	85019507
1700010K10Rik	ENSMUSG00000085413	6	95064011	95067625
AY512915	ENSMUSG00000068180	6	95205720	95283987
Kbtbd8	ENSMUSG00000030031	6	95067234	95079712
Gm10234	ENSMUSG00000068181	6	95272106	95272204
Suclg2	ENSMUSG00000061838	6	95423006	95668792
Magi1	ENSMUSG00000045095	6	93625449	94233316
Slc25a26	ENSMUSG00000045100	6	94450308	94554642
Lrig1	ENSMUSG00000030029	6	94554523	94650152
AC162038.1	ENSMUSG00000092767	6	94773727	94773799
U6	ENSMUSG00000065063	6	95050195	95050301
5_8S_rRNA	ENSMUSG00000088595	6	94776775	94776917
Fam19a1	ENSMUSG00000059187	6	96063148	96607192
1700123L14Rik	ENSMUSG00000072878	6	96114497	96116199
Fam19a4	ENSMUSG00000046500	6	96781203	97010405
A130022J15Rik	ENSMUSG00000035245	6	97060018	97099176
Tmf1	ENSMUSG00000030059	6	97105260	97129118
Uba3	ENSMUSG00000030061	6	97133664	97155636
Arl6ip5	ENSMUSG00000035199	6	97160683	97183309
Lmod3	ENSMUSG00000044086	6	97188522	97202774
Frmd4b	ENSMUSG00000030064	6	97236861	97567535
Mitf	ENSMUSG00000035158	6	97757052	97971352
Gm15531	ENSMUSG00000083086	6	97840282	97840533
SNORA36	ENSMUSG00000065728	6	97112811	97112941
U6	ENSMUSG00000077598	6	96510755	96510858
U1	ENSMUSG00000065017	6	97522070	97522232
SNORA63	ENSMUSG00000064724	6	97497432	97497561
U6	ENSMUSG00000064571	6	97680433	97680539
SNORA17	ENSMUSG00000089464	6	97740506	97740648
U6	ENSMUSG00000065239	6	96419429	96419525
Gm765	ENSMUSG00000090667	6	98188008	98292748
AC158665.1	ENSMUSG00000077813	6	98508733	98508825
Rgs9bp	ENSMUSG00000056043	7	36364017	36370601
Gm16929	ENSMUSG00000084801	7	36557397	36564187
Chst8	ENSMUSG00000060402	7	35459487	35597730
Pepd	ENSMUSG00000063931	7	35697398	35829729
Cebpg	ENSMUSG00000056216	7	35831441	35841522
Cebpa	ENSMUSG00000034957	7	35904312	35906945
Slc7a10	ENSMUSG00000030495	7	35971404	35989917
Lrp3	ENSMUSG00000001802	7	35984852	36000389
Gpatch1	ENSMUSG00000063808	7	36061555	36103459
Rhpn2	ENSMUSG00000030494	7	36119194	36177304
C230052I12Rik	ENSMUSG00000030493	7	36177294	36181836
Gm10166	ENSMUSG00000066543	7	36903274	36903877
Ccdc123	ENSMUSG00000023072	7	36182054	36223708
Pdcd5	ENSMUSG00000030417	7	36427001	36432540
Dpy19l3	ENSMUSG00000043671	7	36470184	36539473
Zfp507	ENSMUSG00000044452	7	36557365	36588008
E130304I02Rik	ENSMUSG00000044997	7	36587612	36588046
Tshz3	ENSMUSG00000021217	7	37483137	37558564
Ankrd27	ENSMUSG00000034867	7	36371266	36424256
Slc7a9	ENSMUSG00000030492	7	36234056	36251055
Tdrd12	ENSMUSG00000030491	7	36254117	36322764
Nudt19	ENSMUSG00000034875	7	36332204	36341323
SNORA17	ENSMUSG00000077469	7	35728875	35729004
AC160540.1	ENSMUSG00000093359	7	37087534	37087634
5S_rRNA	ENSMUSG00000088799	7	35886841	35886959
AC150683.1	ENSMUSG00000093715	7	36019779	36019847
AC149058.1	ENSMUSG00000093153	7	35866929	35866998
AC122376.1	ENSMUSG00000093216	7	37215630	37215719
SNORA17	ENSMUSG00000088307	7	36002254	36002379
7SK	ENSMUSG00000089273	7	37536214	37536492
Zfp536	ENSMUSG00000043456	7	38103693	38558660
Wdr93	ENSMUSG00000039099	7	86888049	86930836
Rlbp1	ENSMUSG00000039194	7	86519757	86531913
Fanci	ENSMUSG00000039187	7	86536815	86595151
Mesp1	ENSMUSG00000030544	7	86937127	86938674
Mesp2	ENSMUSG00000030543	7	86955613	86958317
Anpep	ENSMUSG00000039062	7	86966689	86993096
Polg	ENSMUSG00000039176	7	86593677	86611248
Det1	ENSMUSG00000030610	7	85967848	85992122
Aen	ENSMUSG00000030609	7	86040740	86056095
Isg20	ENSMUSG00000039236	7	86058310	86065248
Rhcg	ENSMUSG00000030549	7	86738249	86762543
5730590G19Rik	ENSMUSG00000046591	7	86805082	86843020
Gm16936	ENSMUSG00000087186	7	86162939	86198209
AI854517	ENSMUSG00000085554	7	86645003	86679283
Kif7	ENSMUSG00000050382	7	86842985	86859072
9330171B17Rik	ENSMUSG00000039133	7	86855257	86857243
Plin1	ENSMUSG00000030546	7	86866050	86877662
Gm16017	ENSMUSG00000082400	7	86557196	86557403
Pex11a	ENSMUSG00000030545	7	86880843	86888017
Acan	ENSMUSG00000030607	7	86198369	86259985
Hapln3	ENSMUSG00000030606	7	86260026	86275895
Mfge8	ENSMUSG00000030605	7	86278655	86293946
Abhd2	ENSMUSG00000039202	7	86418087	86510394
Ntrk3	ENSMUSG00000059146	7	85337248	85723294
Gm9885	ENSMUSG00000052629	7	85723716	85725920
Mrpl46	ENSMUSG00000030612	7	85920122	85928417
Mrps11	ENSMUSG00000030611	7	85928005	85937875
Mir7-2	ENSMUSG00000065609	7	86033163	86033259
7SK	ENSMUSG00000089453	7	86497374	86497631
AC110520.1	ENSMUSG00000092873	7	86178089	86178194
U1	ENSMUSG00000064940	7	85055026	85055206
Mir9-3	ENSMUSG00000093238	7	86650150	86650239
AC138376.1	ENSMUSG00000080603	7	86158911	86159001
Ap3s2	ENSMUSG00000063801	7	87020218	87065526
2610034B18Rik	ENSMUSG00000039043	7	87070247	87080245
Gm17512	ENSMUSG00000090948	7	87061838	87065492
5430400D12Rik	ENSMUSG00000091217	7	87065641	87067407
AC110903.1	ENSMUSG00000077059	7	87094073	87094168
Zfp710	ENSMUSG00000048897	7	87169700	87237637
Idh2	ENSMUSG00000030541	7	87239732	87260278
Sema4b	ENSMUSG00000030539	7	87331727	87371280
Cib1	ENSMUSG00000030538	7	87372042	87377699
Prc1	ENSMUSG00000038943	7	87439336	87461145
D330012F22Rik	ENSMUSG00000050973	7	87377749	87385892
Ttll13	ENSMUSG00000045467	7	87391262	87405707
Ngrn	ENSMUSG00000047084	7	87406101	87410264
Vps33b	ENSMUSG00000030534	7	87414535	87436465
Rccd1	ENSMUSG00000038930	7	87461482	87469340
6330403N20Rik	ENSMUSG00000090517	7	87442614	87444502
Gm15504	ENSMUSG00000082954	7	87382566	87382830
Unc45a	ENSMUSG00000030533	7	87470178	87485891
Hddc3	ENSMUSG00000030532	7	87488023	87490983
AC164075.1	ENSMUSG00000088354	7	87297706	87297765
Mir1965	ENSMUSG00000088619	7	87297776	87297901
RP24-309I5.3	ENSMUSG00000093672	10	17512912	17519727
Gm7584	ENSMUSG00000093537	10	17537185	17538124
Gm17711	ENSMUSG00000091367	10	17731074	17731311
Cited2	ENSMUSG00000039910	10	17443034	17445479
Txlnb	ENSMUSG00000039891	10	17516032	17565471
Heca	ENSMUSG00000039879	10	17588432	17667873
3110003A17Rik	ENSMUSG00000078453	10	17731069	17743058
Reps1	ENSMUSG00000019854	10	17775667	17844961
Ect2l	ENSMUSG00000071392	10	17848828	17895141
Ccdc28a	ENSMUSG00000059554	10	17933482	17954804
Nhsl1	ENSMUSG00000039835	10	18110128	18253698
Hebp2	ENSMUSG00000019853	10	18259929	18265882
D10Bwg1379e	ENSMUSG00000019852	10	18307817	18463564
Gm10827	ENSMUSG00000075308	10	17954859	17957866
U6	ENSMUSG00000088436	10	16836610	16836706
Ccdc6	ENSMUSG00000048701	10	69559869	69655948
2310015B20Rik	ENSMUSG00000019933	10	69667432	69682458
Slc16a9	ENSMUSG00000037762	10	69707848	69748716
Fam13c	ENSMUSG00000043259	10	69903416	70021479
Phyhipl	ENSMUSG00000037747	10	70020430	70118713
Gm7097	ENSMUSG00000089835	10	69746983	69747701
Gm9877	ENSMUSG00000052426	10	69748297	69750924
Tmem26	ENSMUSG00000060044	10	68186494	68245402
Rhobtb1	ENSMUSG00000019944	10	68614182	68754539
A930033H14Rik	ENSMUSG00000090622	10	68672510	68675846
Cdk1	ENSMUSG00000019942	10	68799383	68815686
Ank3	ENSMUSG00000069601	10	68996970	69490184
7SK	ENSMUSG00000087774	10	69963940	69964251
SNORA24	ENSMUSG00000077315	10	68595630	68595746
4930533K18Rik	ENSMUSG00000047692	10	70331417	70397072
Bicc1	ENSMUSG00000014329	10	70385580	70622448
U6	ENSMUSG00000065292	10	70344852	70344958
Gm15647	ENSMUSG00000090212	10	70545624	70546399
Tfam	ENSMUSG00000003923	10	70688212	70701028
Ube2d1	ENSMUSG00000019927	10	70717728	70748010
Igf1	ENSMUSG00000020053	10	87321010	87399792
Pmch	ENSMUSG00000035383	10	87553817	87555120
4930547N16Rik	ENSMUSG00000035365	10	87554177	87609686
Nup37	ENSMUSG00000035351	10	87609737	87641133
Ccdc53	ENSMUSG00000020056	10	87663842	87708897
Dram1	ENSMUSG00000020057	10	87785549	87841825
Gnptab	ENSMUSG00000035311	10	87841877	87910074
Chpt1	ENSMUSG00000060002	10	87915490	87966818
Sycp3	ENSMUSG00000020059	10	87922314	87935981
Mybpc1	ENSMUSG00000020061	10	87981024	88067897
Spic	ENSMUSG00000004359	10	88137517	88147760
Arl1	ENSMUSG00000060904	10	88193603	88206839
Utp20	ENSMUSG00000004356	10	88209352	88289559
Slc5a8	ENSMUSG00000020062	10	88348737	88392250
Ano4	ENSMUSG00000035189	10	88411740	88720535
Gas2l3	ENSMUSG00000074802	10	88871568	88906712
Nr1h4	ENSMUSG00000047638	10	88916979	88996330
Slc17a8	ENSMUSG00000019935	10	89036765	89083998
Scyl2	ENSMUSG00000069539	10	89101466	89149030
Gm16176	ENSMUSG00000058934	10	87289122	87326126
Gm16235	ENSMUSG00000087429	10	87906981	87912632
Gm4925	ENSMUSG00000069540	10	88192286	88193846
Gm17338	ENSMUSG00000091432	10	87841989	87846456
Gm17277	ENSMUSG00000091581	10	88798305	88807507
U6atac	ENSMUSG00000088843	10	87627704	87627818
n-R5s79	ENSMUSG00000065005	10	88172753	88172872
Actr6	ENSMUSG00000019948	10	89174718	89195040
Uhrf1bp1l	ENSMUSG00000019951	10	89207736	89282614
Anks1b	ENSMUSG00000058589	10	89336417	90435730
1500026H17Rik	ENSMUSG00000087686	10	89149116	89163611
U6	ENSMUSG00000064402	10	89284085	89284191
AC130216.1	ENSMUSG00000092642	10	89187495	89187620
U6	ENSMUSG00000088221	10	89913655	89913749
Apaf1	ENSMUSG00000019979	10	90452056	90545515
Ikbip	ENSMUSG00000019975	10	90545685	90565352
Slc25a3	ENSMUSG00000061904	10	90579319	90586804
SNORA53	ENSMUSG00000077167	10	90581036	90581281
U6	ENSMUSG00000087966	10	90468486	90468588
Tmpo	ENSMUSG00000019961	10	90610316	90634759
Gm17499	ENSMUSG00000092024	10	90612260	90613339
Gm16484	ENSMUSG00000090412	10	90690931	90691257
AC123803.1	ENSMUSG00000077818	10	91096347	91096431
Atp2b1	ENSMUSG00000019943	10	98377786	98488777
Poc1b	ENSMUSG00000019952	10	98569670	98660708
Galnt4	ENSMUSG00000090035	10	98570793	98575881
Phxr2	ENSMUSG00000055108	10	98588151	98588955
Dusp6	ENSMUSG00000019960	10	98725865	98730122
B530045E10Rik	ENSMUSG00000044633	10	98883156	98885681
Gad1-ps	ENSMUSG00000090665	10	98906364	98909641
Csl	ENSMUSG00000046934	10	99220339	99222292
Kitl	ENSMUSG00000019966	10	99478264	99563047
Gm8701	ENSMUSG00000091739	10	99788062	99794069
Gm16239	ENSMUSG00000089994	10	98641818	98647244
AC167229.1	ENSMUSG00000077034	10	99606888	99606997
AC167229.2	ENSMUSG00000077043	10	99602135	99602244
Gm4301	ENSMUSG00000091918	10	99798310	99799225
Gm4302	ENSMUSG00000091101	10	99803490	99804374
Gm4303	ENSMUSG00000090421	10	99808624	99809493
Gm4305	ENSMUSG00000091715	10	99813745	99814614
Gm8711	ENSMUSG00000091552	10	99818871	99819750
Gm4307	ENSMUSG00000091170	10	99823990	99824859
Gm4308	ENSMUSG00000091145	10	99829133	99830048
Gm4312	ENSMUSG00000091915	10	99844279	99845194
Gm4781	ENSMUSG00000090987	10	99858921	99859706
Tmtc3	ENSMUSG00000036676	10	99906536	99949984
Cep290	ENSMUSG00000019971	10	99950923	100036289
Gm8723	ENSMUSG00000091738	10	99839096	99839969
Gm15662	ENSMUSG00000089855	10	104675190	104675348
Gm15666	ENSMUSG00000084399	10	104943272	104944195
Gm15664	ENSMUSG00000089904	10	104957516	104957699
Gm15663	ENSMUSG00000085282	10	105011009	105020930
Tmtc2	ENSMUSG00000036019	10	104624719	105011507
BC067068	ENSMUSG00000036009	10	105200241	105278436
Ccdc59	ENSMUSG00000019897	10	105278123	105284889
Rps15a-ps1	ENSMUSG00000056877	10	105629434	105629826
Ppfia2	ENSMUSG00000053825	10	105902321	106370502
C230021G24Rik	ENSMUSG00000079044	10	105903995	105907824
U6	ENSMUSG00000089019	10	104302260	104302364
SNORA17	ENSMUSG00000077407	10	104577263	104577391
AC132471.1	ENSMUSG00000080525	10	105287151	105287228
U1	ENSMUSG00000064432	10	104477329	104477494
SNORA61	ENSMUSG00000088415	10	105366668	105366799
n-R5s80	ENSMUSG00000084545	10	105241143	105241253
SNORA17	ENSMUSG00000088084	10	105493014	105493135
Kifc5c-ps	ENSMUSG00000043800	10	117031241	117031988
Gm9040	ENSMUSG00000074689	10	117762781	117764025
Gm9044	ENSMUSG00000074688	10	117768220	117769464
Gm9045	ENSMUSG00000074687	10	117773643	117774887
Gm9046	ENSMUSG00000074686	10	117779067	117780311
Gm9048	ENSMUSG00000074685	10	117784491	117785735
Cpm	ENSMUSG00000020183	10	117066556	117124408
Mdm2	ENSMUSG00000020184	10	117125944	117147814
Slc35e3	ENSMUSG00000060181	10	117170735	117183414
Nup107	ENSMUSG00000052798	10	117187680	117229761
Rap1b	ENSMUSG00000052681	10	117251527	117282991
Mdm1	ENSMUSG00000020212	10	117578843	117606053
Il22	ENSMUSG00000074695	10	117641998	117647098
Iltifb	ENSMUSG00000090461	10	117726685	117732094
Gm9049	ENSMUSG00000074684	10	117788441	117791262
Ifng	ENSMUSG00000055170	10	117878103	117882948
Dyrk2	ENSMUSG00000028630	10	118296405	118305959
4932442E05Rik	ENSMUSG00000050709	10	118297882	118300598
Cand1	ENSMUSG00000020114	10	118636311	118677111
U6	ENSMUSG00000065059	10	117099338	117099444
Gm16320	ENSMUSG00000085454	10	118866423	118892435
Gm16321	ENSMUSG00000085592	10	118879735	118880680
Grip1	ENSMUSG00000034813	10	118891090	119524317
4930564G21Rik	ENSMUSG00000084764	10	119183119	119198755
AC162467.1	ENSMUSG00000077973	10	118995359	118995450
4930483C13Rik	ENSMUSG00000085418	10	119262260	119289446
Helb	ENSMUSG00000020228	10	119520664	119550043
Irak3	ENSMUSG00000020227	10	119578704	119639186
1700006J14Rik	ENSMUSG00000034764	10	119801213	119821392
9230105E05Rik	ENSMUSG00000090191	10	119826579	119829849
Tmbim4	ENSMUSG00000020225	10	119638646	119661973
Llph	ENSMUSG00000020224	10	119664126	119669127
Hmga2	ENSMUSG00000056758	10	119798331	119913525
Mir763	ENSMUSG00000076448	10	119885047	119885166
SNORA17	ENSMUSG00000088924	10	120042593	120042652
Gm15961	ENSMUSG00000086444	10	120237733	120238850
Gm15910	ENSMUSG00000087480	10	120294685	120300382
Gm4473	ENSMUSG00000086522	10	120336213	120338944
4921513I03Rik	ENSMUSG00000044544	10	120202830	120215942
Msrb3	ENSMUSG00000051236	10	120218152	120336157
Gm16166	ENSMUSG00000082936	10	120365242	120366028
Gm4478	ENSMUSG00000078107	10	120780328	120780714
Lemd3	ENSMUSG00000048661	10	120360469	120416388
Wif1	ENSMUSG00000020218	10	120471016	120537706
Tbc1d30	ENSMUSG00000052302	10	120700880	120748245
Gns	ENSMUSG00000034707	10	120802146	120834301
Rassf3	ENSMUSG00000025795	10	120847406	120913306
Tbk1	ENSMUSG00000020115	10	120983511	121023850
Xpot	ENSMUSG00000034667	10	121024436	121063372
D930020B18Rik	ENSMUSG00000047642	10	121078644	121130940
BC048403	ENSMUSG00000053684	10	121176993	121189934
Srgap1	ENSMUSG00000020121	10	121218047	121484371
Tmem5	ENSMUSG00000034620	10	121515170	121534427
AC124992.1	ENSMUSG00000092841	10	121055524	121055599
AC140381.1	ENSMUSG00000093030	10	120411357	120411481
Avpr1a	ENSMUSG00000020123	10	121885555	121890509
Gm6969	ENSMUSG00000066553	12	25322866	25323897
Gm16372	ENSMUSG00000057160	12	25178072	25178521
Taf1b	ENSMUSG00000059669	12	25183446	25243436
Grhl1	ENSMUSG00000020656	12	25257152	25302256
Klf11	ENSMUSG00000020653	12	25336236	25347639
Cys1	ENSMUSG00000062563	12	25350703	25366678
Rrm2	ENSMUSG00000020649	12	25393106	25399011
Mboat2	ENSMUSG00000020646	12	25516464	25645166
Kidins220	ENSMUSG00000036333	12	25659797	25746142
Id2	ENSMUSG00000020644	12	25778666	25780957
Rnf144a	ENSMUSG00000020642	12	26991662	27100121
SNORA70	ENSMUSG00000089203	12	25463883	25464011
5S_rRNA	ENSMUSG00000089441	12	26372666	26372771
Rsad2	ENSMUSG00000020641	12	27127618	27141317
Cmpk2	ENSMUSG00000020638	12	27154069	27164700
4930555J06Rik	ENSMUSG00000086315	12	40764686	40766614
Gm17056	ENSMUSG00000090387	12	40925243	40927692
Gm17024	ENSMUSG00000090582	12	40936074	40937660
Gm7008	ENSMUSG00000035983	12	40949345	40955771
Zfp277	ENSMUSG00000055917	12	41041633	41172377
Dock4	ENSMUSG00000035954	12	41172640	41573073
Immp2l	ENSMUSG00000056899	12	41750677	43056575
Lrrn3	ENSMUSG00000036295	12	42178260	42212338
Gm889	ENSMUSG00000071342	12	40902973	40925902
Ifrd1	ENSMUSG00000001627	12	40928154	40975091
Arl4a	ENSMUSG00000047446	12	40732034	40764612
Scin	ENSMUSG00000002565	12	40786356	40860815
SNORA17	ENSMUSG00000077613	12	42075028	42075159
Mir1938	ENSMUSG00000089371	12	40949299	40949398
AC154353.1	ENSMUSG00000093214	12	43382703	43382800
Mdga2	ENSMUSG00000079510	12	67571623	67572045
Mdga2	ENSMUSG00000034912	12	67572502	68323529
Rpl17-ps3	ENSMUSG00000069392	12	68611716	68612297
U2	ENSMUSG00000084448	12	68713283	68713468
SNORA17	ENSMUSG00000088019	12	67662241	67662359
n-R5s60	ENSMUSG00000065233	12	68590100	68590218
Gm16133	ENSMUSG00000089854	13	63434445	63441267
Gm16132	ENSMUSG00000090232	13	63478069	63482353
Gm16134	ENSMUSG00000089868	13	63548238	63548573
2010111I01Rik	ENSMUSG00000021458	13	63066253	63427404
Fancc	ENSMUSG00000021461	13	63406017	63598586
Ptch1	ENSMUSG00000021466	13	63610261	63674474
0610007P08Rik	ENSMUSG00000021470	13	63916548	64001610
Hsd17b3	ENSMUSG00000033122	13	64159582	64190509
Slc35d2	ENSMUSG00000033114	13	64197618	64230638
Zfp367	ENSMUSG00000044934	13	64234330	64254510
Habp4	ENSMUSG00000021476	13	64263174	64287844
Cdc14b	ENSMUSG00000033102	13	64293853	64376281
1110018J18Rik	ENSMUSG00000021482	13	64391124	64414018
Ctsl	ENSMUSG00000021477	13	64464522	64471614
Cdk20	ENSMUSG00000021483	13	64533850	64541028
Cntnap3	ENSMUSG00000033063	13	64838899	65005196
4930458L03Rik	ENSMUSG00000056223	13	65018714	65024503
4932441B19Rik	ENSMUSG00000074849	13	65134366	65139312
Prss47	ENSMUSG00000090658	13	65145991	65153182
Hiatl1	ENSMUSG00000038212	13	65165971	65214290
Gm16907	ENSMUSG00000086950	13	63390909	63398455
1810034E14Rik	ENSMUSG00000074861	13	64350054	64369453
U6	ENSMUSG00000089092	13	64397745	64397832
Mir27b	ENSMUSG00000065475	13	63402008	63402104
Mir3074-1	ENSMUSG00000092741	13	63402488	63402604
Mir23b	ENSMUSG00000065599	13	63401780	63401876
Olfr466	ENSMUSG00000049806	13	65253534	65254460
SNORA48	ENSMUSG00000089161	13	65259566	65259716
Nlrp4f	ENSMUSG00000032999	13	65278419	65307276
Gm10775	ENSMUSG00000074847	13	65360847	65362134
Zfp369	ENSMUSG00000021514	13	65380122	65405529
Gm5792	ENSMUSG00000074839	13	65517533	65518081
Gm10139	ENSMUSG00000063905	13	65613614	65613784
Gm6901	ENSMUSG00000074843	13	65660102	65660650
Gm7782	ENSMUSG00000090514	13	65480701	65553664
Gm17278	ENSMUSG00000091589	13	65691229	65692497
Gm6917	ENSMUSG00000074841	13	65995145	65995681
Gm6910	ENSMUSG00000055763	13	66108671	66109357
Gm17353	ENSMUSG00000091347	13	66007587	66007841
Vmn2r-ps100	ENSMUSG00000090456	13	66045463	66048224
Gm7822	ENSMUSG00000091975	13	65881841	65968241
Gm10324	ENSMUSG00000071302	13	66139239	66141604
Fam83a	ENSMUSG00000051225	15	57816974	57842564
9130401M01Rik	ENSMUSG00000022362	15	57853831	57907980
Zhx1	ENSMUSG00000022361	15	57878558	57908096
Atad2	ENSMUSG00000022360	15	57925602	57966637
Wdyhv1	ENSMUSG00000022359	15	57972963	57990207
Fbxo32	ENSMUSG00000022358	15	58011634	58046433
Klhl38	ENSMUSG00000022357	15	58146128	58155724
Anxa13	ENSMUSG00000055114	15	58173429	58197682
D15Ertd621e	ENSMUSG00000037119	15	58247023	58289356
Fer1l6	ENSMUSG00000037106	15	58341603	58595425
Tmem65	ENSMUSG00000062373	15	58613824	58655085
Gm5959	ENSMUSG00000061490	15	58678133	58678876
Trmt12	ENSMUSG00000037085	15	58704204	58708336
Rnf139	ENSMUSG00000037075	15	58720784	58733945
Tatdn1	ENSMUSG00000050891	15	58721708	58765285
Ndufb9	ENSMUSG00000022354	15	58765365	58771044
Mtss1	ENSMUSG00000022353	15	58772799	58913581
Gm5045	ENSMUSG00000025922	15	59042458	59043338
Sqle	ENSMUSG00000022351	15	59146632	59162747
E430025E21Rik	ENSMUSG00000022350	15	59163553	59205722
Nsmce2	ENSMUSG00000059586	15	59205753	59433238
Trib1	ENSMUSG00000032501	15	59479905	59488105
Gm15943	ENSMUSG00000086801	15	58046030	58155608
RP23-102L5.1	ENSMUSG00000093677	15	58612016	58613506
SNORA2	ENSMUSG00000064597	15	57873071	57873206
U7	ENSMUSG00000089504	15	57974763	57974824
7SK	ENSMUSG00000084485	15	58397169	58397469
SNORA11	ENSMUSG00000080461	15	57978171	57978297
U1	ENSMUSG00000065049	15	58650878	58651033
Gm7713	ENSMUSG00000071750	15	59825985	59826383
4933412E24Rik	ENSMUSG00000071749	15	59846421	59848173
U6	ENSMUSG00000077511	15	59916343	59916449
Lsamp	ENSMUSG00000061080	16	41532971	42181792
U6	ENSMUSG00000077535	16	40306332	40306425
AC124193.1	ENSMUSG00000092636	16	41217858	41217949
Ppt2	ENSMUSG00000015474	17	34753607	34765455
Prrt1	ENSMUSG00000015476	17	34766478	34770071
Fkbpl	ENSMUSG00000033739	17	34781709	34783269
Atf6b	ENSMUSG00000015461	17	34784091	34792019
Tnxb	ENSMUSG00000033327	17	34807480	34856760
C4b	ENSMUSG00000073418	17	34865325	34880827
Cyp21a1	ENSMUSG00000024365	17	34938293	34941506
Stk19	ENSMUSG00000061207	17	34960938	34973890
Dom3z	ENSMUSG00000040482	17	34973964	34976178
Skiv2l	ENSMUSG00000040356	17	34976173	34987155
Rdbp	ENSMUSG00000024369	17	34987336	34993317
Cfb	ENSMUSG00000090231	17	34993319	34999463
C2	ENSMUSG00000024371	17	34993357	35035210
Gm20547	ENSMUSG00000092511	17	34993357	35018987
Zbtb12	ENSMUSG00000049823	17	35016428	35033787
Ehmt2	ENSMUSG00000013787	17	35035414	35050997
Slc44a4	ENSMUSG00000007034	17	35051411	35067381
Neu1	ENSMUSG00000007038	17	35068198	35072898
Hspa1b	ENSMUSG00000090877	17	35093381	35096183
Hspa1a	ENSMUSG00000091971	17	35106144	35109069
Gm20481	ENSMUSG00000092609	17	35106857	35109081
Hspa1l	ENSMUSG00000007033	17	35109648	35116229
Lsm2	ENSMUSG00000007050	17	35118807	35122836
D17H6S56E-5	ENSMUSG00000091747	17	35133681	35138609
Vars	ENSMUSG00000007029	17	35137932	35153267
D17H6S56E-3	ENSMUSG00000007030	17	35153524	35163686
Ng23	ENSMUSG00000036185	17	35162904	35164961
Msh5	ENSMUSG00000007035	17	35165550	35183690
Clic1	ENSMUSG00000007041	17	35186911	35195694
Ddah2	ENSMUSG00000007039	17	35195980	35199040
AU023871	ENSMUSG00000073414	17	35199638	35203129
Ly6g6c	ENSMUSG00000007044	17	35202333	35206570
Ly6g6c	ENSMUSG00000092586	17	35204270	35206995
Ly6g6d	ENSMUSG00000073413	17	35208388	35215010
Ly6g6e	ENSMUSG00000013766	17	35213847	35215749
Ly6g6f	ENSMUSG00000034923	17	35217425	35222555
Abhd16a	ENSMUSG00000007036	17	35226208	35239932
Ly6g5c	ENSMUSG00000034482	17	35245224	35248936
Ly6g5b	ENSMUSG00000043807	17	35250893	35252373
Csnk2b	ENSMUSG00000024387	17	35253141	35258998
Gpank1	ENSMUSG00000092417	17	35258400	35261759
D17H6S53E	ENSMUSG00000043311	17	35263318	35265800
Apom	ENSMUSG00000024391	17	35265942	35268995
Bag6	ENSMUSG00000024392	17	35272123	35284265
Prrc2a	ENSMUSG00000024393	17	35286021	35301842
Aif1	ENSMUSG00000024397	17	35307936	35313013
Lst1	ENSMUSG00000073412	17	35322040	35325384
Ltb	ENSMUSG00000024399	17	35331384	35333265
Tnf	ENSMUSG00000024401	17	35336326	35338952
Lta	ENSMUSG00000024402	17	35340110	35342296
Nfkbil1	ENSMUSG00000042419	17	35357120	35372737
Gm16181	ENSMUSG00000081650	17	35357779	35361079
Atp6v1g2	ENSMUSG00000024403	17	35370605	35375712
Ddx39b	ENSMUSG00000019432	17	35378691	35390652
H2-D1	ENSMUSG00000073411	17	35399675	35404444
H2-Q1	ENSMUSG00000079507	17	35457350	35462044
H2-Q2	ENSMUSG00000091705	17	35479187	35483707
H2-Q4	ENSMUSG00000035929	17	35516562	35522235
H2-Q6	ENSMUSG00000073409	17	35561795	35567000
H2-Q7	ENSMUSG00000060550	17	35576100	35580714
H2-Q10	ENSMUSG00000067235	17	35607034	35611508
Pou5f1	ENSMUSG00000024406	17	35642982	35647721
Tcf19	ENSMUSG00000050410	17	35649679	35653769
Cchcr1	ENSMUSG00000040312	17	35654045	35667960
Psors1c2	ENSMUSG00000024409	17	35670146	35671592
Cdsn	ENSMUSG00000039518	17	35689073	35694125
2300002M23Rik	ENSMUSG00000039269	17	35704395	35705897
Sfta2	ENSMUSG00000090509	17	35738494	35787516
Gm9573	ENSMUSG00000090588	17	35754868	35763582
Dpcr1	ENSMUSG00000073408	17	35772697	35780640
Vars2	ENSMUSG00000038838	17	35792579	35804537
Gtf2h4	ENSMUSG00000001524	17	35804675	35810684
Ddr1	ENSMUSG00000003534	17	35818512	35841566
Ier3	ENSMUSG00000003541	17	35958629	35959868
Flot1	ENSMUSG00000059714	17	35960175	35969736
Tubb5	ENSMUSG00000001525	17	35970871	35975251
Mdc1	ENSMUSG00000061607	17	35978460	35996615
Kifc1	ENSMUSG00000079553	17	34012611	34027606
Daxx	ENSMUSG00000002307	17	34046359	34052534
Tapbp	ENSMUSG00000024308	17	34052844	34066235
Zbtb22	ENSMUSG00000051390	17	34052849	34056269
Rgl2	ENSMUSG00000041354	17	34066488	34074632
H2-Ke2	ENSMUSG00000024309	17	34075766	34077288
Wdr46	ENSMUSG00000024312	17	34077605	34086640
B3galt4	ENSMUSG00000067370	17	34086859	34088433
Rps18	ENSMUSG00000008668	17	34088944	34092946
Vps52	ENSMUSG00000024319	17	34092757	34103929
H2-K1	ENSMUSG00000061232	17	34132962	34137278
Ring1	ENSMUSG00000024325	17	34157737	34161625
H2-Ke6	ENSMUSG00000073422	17	34162978	34165005
Slc39a7	ENSMUSG00000024327	17	34165212	34168635
Rxrb	ENSMUSG00000039656	17	34168757	34175338
Col11a2	ENSMUSG00000024330	17	34176382	34203630
H2-Oa	ENSMUSG00000024334	17	34229285	34232179
Brd2	ENSMUSG00000024335	17	34248965	34259262
H2-DMa	ENSMUSG00000037649	17	34272127	34276046
H2-DMb2	ENSMUSG00000037548	17	34280252	34288498
H2-DMb1	ENSMUSG00000079547	17	34290017	34297168
Psmb9	ENSMUSG00000024337	17	34318932	34324697
Psmb9	ENSMUSG00000092299	17	34318933	34324709
Tap1	ENSMUSG00000037321	17	34324498	34334170
Psmb8	ENSMUSG00000024338	17	34334666	34338399
Gm20496	ENSMUSG00000092550	17	34336260	34342394
Tap2	ENSMUSG00000024339	17	34340472	34353266
Gm15821	ENSMUSG00000081512	17	34348257	34351404
H2-Ob	ENSMUSG00000041538	17	34375848	34390850
H2-Ab1	ENSMUSG00000073421	17	34400154	34406363
H2-Aa	ENSMUSG00000036594	17	34406276	34424772
H2-Eb1	ENSMUSG00000060586	17	34442828	34453144
H2-Eb2	ENSMUSG00000067341	17	34462610	34477174
Gm11140	ENSMUSG00000079538	17	34477973	34478568
Btnl2	ENSMUSG00000024340	17	34491767	34506438
Btnl1	ENSMUSG00000062638	17	34514077	34522721
BC051142	ENSMUSG00000057246	17	34535765	34597679
Btnl4	ENSMUSG00000058435	17	34605987	34612882
Btnl6	ENSMUSG00000058762	17	34644880	34654297
Btnl7	ENSMUSG00000061728	17	34669822	34684596
Notch4	ENSMUSG00000015468	17	34701213	34725448
Gpsm3	ENSMUSG00000034786	17	34726751	34728699
Pbx2	ENSMUSG00000034673	17	34728211	34734345
Gm4134	ENSMUSG00000092571	17	33998247	34001173
Gm7029	ENSMUSG00000092174	17	34003824	34011061
BC033916	ENSMUSG00000092349	17	34042080	34043620
BC051226	ENSMUSG00000092564	17	34045127	34046262
H2-K2	ENSMUSG00000067203	17	34111731	34115733
Gm4152	ENSMUSG00000092512	17	34117431	34117689
Mir219-1	ENSMUSG00000092338	17	34161911	34162015
Gm20427	ENSMUSG00000092595	17	34162979	34168517
Gm8752	ENSMUSG00000092278	17	35582801	35585871
Gm20461	ENSMUSG00000092525	17	34777791	34780922
Cyp21a2-ps	ENSMUSG00000092471	17	34856758	34859197
Gm20460	ENSMUSG00000092176	17	34751429	34764294
Gm15329	ENSMUSG00000083441	17	34658695	34658849
Gm20462	ENSMUSG00000092406	17	34704675	34705082
Btnl6	ENSMUSG00000092618	17	34644749	34654297
Gm15331	ENSMUSG00000083020	17	34638052	34638436
Agpat1	ENSMUSG00000034254	17	34741207	34750394
Egfl8	ENSMUSG00000015467	17	34750294	34752916
Gm20463	ENSMUSG00000092395	17	34738096	34738521
Gm18734	ENSMUSG00000092438	17	35441151	35443262
Gm8741	ENSMUSG00000091655	17	35472854	35473240
H2-Q3	ENSMUSG00000092253	17	35495934	35496917
Gm11131	ENSMUSG00000079505	17	35513966	35517237
H2-Q5	ENSMUSG00000055413	17	35531071	35534971
CT025759.1	ENSMUSG00000093620	17	34993518	34999057
1110038B12Rik	ENSMUSG00000092203	17	35087183	35089416
Rnf5	ENSMUSG00000015478	17	34738036	34740635
Gm8696	ENSMUSG00000092557	17	35091273	35091657
Gm10501	ENSMUSG00000073415	17	35113844	35118733
Gm20522	ENSMUSG00000092241	17	35259683	35263385
Gm17705	ENSMUSG00000090936	17	35302064	35304131
Ncr3-ps	ENSMUSG00000086076	17	35317480	35321607
Gm18733	ENSMUSG00000092444	17	35415121	35416359
Stk19-ps1	ENSMUSG00000092202	17	34881698	34884099
Skiv2l-ps1	ENSMUSG00000092543	17	34906778	34908173
Tnxa	ENSMUSG00000092200	17	34908340	34938568
C4a	ENSMUSG00000015451	17	34946037	34960409
Ager	ENSMUSG00000015452	17	34734807	34737879
Gm9566	ENSMUSG00000092383	17	34210707	34213107
Gm20493	ENSMUSG00000092246	17	34270270	34270482
Gm20506	ENSMUSG00000092222	17	34386002	34387209
Gm20513	ENSMUSG00000092415	17	34430018	34442665
H2-Ea-ps	ENSMUSG00000036322	17	34478897	34481589
Gm15320	ENSMUSG00000082103	17	34528306	34535107
Gm15321	ENSMUSG00000083522	17	34529348	34529635
Gm15332	ENSMUSG00000083369	17	34617708	34618064
Btnl5	ENSMUSG00000073420	17	34625015	34634374
Gm20527	ENSMUSG00000092198	17	35602400	35603427
Gm20419	ENSMUSG00000092215	17	35617084	35617673
Gm19553	ENSMUSG00000093516	17	35646022	35647496
Gm9613	ENSMUSG00000092409	17	35698868	35699063
Gm20483	ENSMUSG00000092389	17	35788773	35789256
Gm4577	ENSMUSG00000086867	17	35840841	35845189
Gm20443	ENSMUSG00000092219	17	35874679	35876751
Gm20442	ENSMUSG00000092600	17	35880268	35901136
4833427F10Rik	ENSMUSG00000092171	17	35909395	35917632
Gm8750	ENSMUSG00000092560	17	35537744	35540672
U6	ENSMUSG00000084601	17	34096608	34096712
SNORD83	ENSMUSG00000075770	17	35379623	35379699
U6	ENSMUSG00000065816	17	34824641	34824747
AC087117.2	ENSMUSG00000092687	17	35088958	35089020
SNORA38	ENSMUSG00000064853	17	35299508	35299641
SNORD83	ENSMUSG00000065273	17	35384120	35384195
AC087117.1	ENSMUSG00000092678	17	35089185	35089254
U6	ENSMUSG00000065774	17	35836148	35836254
Mir219-1	ENSMUSG00000065555	17	34161928	34162037
Snord52	ENSMUSG00000093009	17	35087897	35087962
U6	ENSMUSG00000065139	17	35186163	35186266
CR974466.1	ENSMUSG00000077807	17	35390896	35390984
3110082D06Rik	ENSMUSG00000042256	17	42452896	42644690
Opn5	ENSMUSG00000043972	17	42693732	42748262
Gpr115	ENSMUSG00000023918	17	42793840	42829233
Gpr111	ENSMUSG00000057899	17	42845885	42879128
Cd2ap	ENSMUSG00000061665	17	42929900	43013373
Tnfrsf21	ENSMUSG00000023915	17	43153504	43226137
Gpr110	ENSMUSG00000041293	17	43407278	43461686
Gpr116	ENSMUSG00000056492	17	43526415	43596506
Mep1a	ENSMUSG00000023914	17	43611273	43639761
Pla2g7	ENSMUSG00000023913	17	43705047	43749150
Tdrd6	ENSMUSG00000040140	17	43752284	43767248
Slc25a27	ENSMUSG00000023912	17	43778849	43804125
Cyp39a1	ENSMUSG00000023963	17	43804374	43888380
Rcan2	ENSMUSG00000039601	17	43938800	44176465
Enpp5	ENSMUSG00000023960	17	44215762	44223516
Enpp4	ENSMUSG00000023961	17	44233257	44242758
1700071M16Rik	ENSMUSG00000090307	17	43725289	43729391
U4	ENSMUSG00000064582	17	43591204	43591346
U2	ENSMUSG00000084474	17	43835312	43835501
7SK	ENSMUSG00000088576	17	44098505	44098790
Clic5	ENSMUSG00000023959	17	44325521	44417117
Runx2	ENSMUSG00000039153	17	44632936	44951746
Runx2	ENSMUSG00000092206	17	44744480	44951746
Gm16317	ENSMUSG00000090048	17	44698939	44700121
n-R5s27	ENSMUSG00000070209	17	44777974	44778092
Gm6684	ENSMUSG00000047168	19	20660564	20661247
Rorb	ENSMUSG00000036192	19	19005095	19185686
Anxa1	ENSMUSG00000024659	19	20447918	20465434
Aldh1a1	ENSMUSG00000053279	19	20676451	20717952
Aldh1a7	ENSMUSG00000024747	19	20767443	20802052
Tmc1	ENSMUSG00000024749	19	20857948	21028692
Trpm6	ENSMUSG00000024727	19	18824473	18967000
SNORA71	ENSMUSG00000064783	19	20107994	20108125
SNORA17	ENSMUSG00000088907	19	19350389	19350520
RP23-397G23.1	ENSMUSG00000093628	19	26695312	26697909
4931403E22Rik	ENSMUSG00000093772	19	26843291	26898397
Kank1	ENSMUSG00000032702	19	25311465	25508987
Dmrt1	ENSMUSG00000024837	19	25580108	25678819
Dmrt3	ENSMUSG00000042372	19	25685027	25698410
Dmrt2	ENSMUSG00000048138	19	25746907	25753500
Smarca2	ENSMUSG00000024921	19	26679605	26852811
Gm815	ENSMUSG00000074913	19	26960415	26963129
Vldlr	ENSMUSG00000024924	19	27290974	27328721
Kcnv2	ENSMUSG00000047298	19	27397078	27411669
U4	ENSMUSG00000084589	19	26334859	26334983
U6	ENSMUSG00000064843	19	25528450	25528553
D19Bwg1357e	ENSMUSG00000041360	19	27463192	27504310

## Sheet: longevityIgG2b-Prn
Gene Name	Ensembl Gene ID	Chromosome	Start	End
Pkhd1	ENSMUSG00000043760	1	20047860	20608145
Il17a	ENSMUSG00000025929	1	20720986	20724577
Il17f	ENSMUSG00000041872	1	20767232	20774351
Mcm3	ENSMUSG00000041859	1	20793055	20810359
Paqr8	ENSMUSG00000025931	1	20880691	20929632
Efhc1	ENSMUSG00000041809	1	20941707	20980919
Tram2	ENSMUSG00000041779	1	20986377	21069310
Tmem14a	ENSMUSG00000025933	1	21208656	21220248
Gsta3	ENSMUSG00000025934	1	21230670	21255442
Gm4956	ENSMUSG00000025936	1	21275327	21288393
Khdc1a	ENSMUSG00000067750	1	21339722	21342281
Khdc1c	ENSMUSG00000041722	1	21358412	21360926
Khdc1b	ENSMUSG00000085079	1	21373637	21376465
Kcnq5	ENSMUSG00000028033	1	21388484	21952023
4930486I03Rik	ENSMUSG00000089914	1	20371174	20382381
Gm15795	ENSMUSG00000090142	1	20434339	20434641
Gm7094	ENSMUSG00000046847	1	21262484	21262990
Gm16329	ENSMUSG00000086194	1	21344086	21345197
Gm16327	ENSMUSG00000087453	1	21354884	21355111
Gm2709	ENSMUSG00000085507	1	21362751	21363845
Gm16533	ENSMUSG00000087427	1	21369636	21369863
Gm16328	ENSMUSG00000085679	1	21380987	21381182
Gm7658	ENSMUSG00000082935	1	21502014	21503137
6720483E21Rik	ENSMUSG00000087078	1	20878731	20880554
SNORA17	ENSMUSG00000088858	1	20832616	20832747
Mir206	ENSMUSG00000065559	1	20669091	20669163
U6	ENSMUSG00000070175	1	20434892	20434993
Mir133b	ENSMUSG00000065480	1	20672850	20672968
SNORA17	ENSMUSG00000077314	1	20905491	20905621
AC163028.1	ENSMUSG00000080585	1	19911391	19911480
Tns1	ENSMUSG00000055322	1	73956805	74171021
Rufy4	ENSMUSG00000061815	1	74172115	74194797
Cxcr2	ENSMUSG00000026180	1	74200563	74207812
Cxcr1	ENSMUSG00000048480	1	74238359	74241205
Arpc2	ENSMUSG00000006304	1	74283071	74314783
Gpbar1	ENSMUSG00000064272	1	74325124	74326198
Aamp	ENSMUSG00000006299	1	74326421	74331254
Pnkd	ENSMUSG00000026179	1	74331504	74400268
Tmbim1	ENSMUSG00000006301	1	74334821	74352196
Gm216	ENSMUSG00000073650	1	74408682	74415895
Slc11a1	ENSMUSG00000026177	1	74421777	74432636
Ctdsp1	ENSMUSG00000026176	1	74438083	74443859
Vil1	ENSMUSG00000026175	1	74455950	74482133
Usp37	ENSMUSG00000033364	1	74482084	74590860
Rqcd1	ENSMUSG00000026174	1	74552632	74577418
Plcd4	ENSMUSG00000026173	1	74589462	74614368
Zfp142	ENSMUSG00000026135	1	74611701	74634820
Bcs1l	ENSMUSG00000026172	1	74634863	74639017
Rnf25	ENSMUSG00000026171	1	74640322	74647971
Stk36	ENSMUSG00000033276	1	74648019	74683468
Ttll4	ENSMUSG00000033257	1	74708319	74748406
Cyp27a1	ENSMUSG00000026170	1	74760148	74784464
Prkag3	ENSMUSG00000006542	1	74786073	74795795
Wnt6	ENSMUSG00000033227	1	74818466	74831893
Wnt10a	ENSMUSG00000026167	1	74838090	74850753
Cdk5r2	ENSMUSG00000090071	1	74901508	74904005
Fev	ENSMUSG00000055197	1	74928083	74931993
Cryba2	ENSMUSG00000006546	1	74936508	74939717
Ccdc108	ENSMUSG00000047021	1	74948645	74982173
Ihh	ENSMUSG00000006538	1	74991891	74998246
Nhej1	ENSMUSG00000026162	1	75013713	75093213
Slc23a3	ENSMUSG00000026205	1	75122117	75130464
1810031K17Rik	ENSMUSG00000033159	1	75131128	75139271
Fam134a	ENSMUSG00000049339	1	75139360	75144483
Zfand2b	ENSMUSG00000026197	1	75165220	75168203
Abcb6	ENSMUSG00000026198	1	75168291	75176966
Atg9a	ENSMUSG00000033124	1	75177440	75188497
Glb1l	ENSMUSG00000026200	1	75194818	75207353
Stk16	ENSMUSG00000026201	1	75207413	75212181
Tuba4a	ENSMUSG00000026202	1	75211549	75215828
Dnajb2	ENSMUSG00000026203	1	75233040	75241379
Ptprn	ENSMUSG00000026204	1	75243616	75260783
Resp18	ENSMUSG00000033061	1	75268774	75274990
Dnpep	ENSMUSG00000026209	1	75304471	75314212
Des	ENSMUSG00000026208	1	75356904	75365154
Speg	ENSMUSG00000026207	1	75371872	75428895
Gm16582	ENSMUSG00000089964	1	74897469	74926527
Gm15841	ENSMUSG00000089653	1	74948945	74954227
Ankzf1	ENSMUSG00000026199	1	75188709	75195962
Gm15179	ENSMUSG00000085653	1	75364787	75371587
Gm15178	ENSMUSG00000086053	1	75388706	75392938
Mir26b	ENSMUSG00000065468	1	74440884	74440968
AC117610.1	ENSMUSG00000093155	1	74633470	74633546
Mir1928	ENSMUSG00000087820	1	74253128	74253194
U6	ENSMUSG00000075767	1	74259387	74259493
Mir375	ENSMUSG00000065616	1	74947226	74947300
5S_rRNA	ENSMUSG00000088666	1	73810284	73810409
Gmppa	ENSMUSG00000033021	1	75432505	75439754
Accn4	ENSMUSG00000033007	1	75447011	75470918
Chpf	ENSMUSG00000032997	1	75471144	75476046
Obsl1	ENSMUSG00000026211	1	75475885	75503027
Tmem198	ENSMUSG00000051703	1	75476107	75482280
Inha	ENSMUSG00000032968	1	75503652	75506941
Stk11ip	ENSMUSG00000026213	1	75518104	75533910
Slc4a3	ENSMUSG00000006576	1	75542841	75558747
Gm15181	ENSMUSG00000082745	1	75510682	75510858
Gm15183	ENSMUSG00000082059	1	75538786	75539133
Gm15180	ENSMUSG00000083244	1	75564658	75565149
Gm15182	ENSMUSG00000082528	1	75621229	75622904
Gm5257	ENSMUSG00000082012	1	75632965	75633754
Ndufa10	ENSMUSG00000026260	1	94335587	94370437
Olfr1416	ENSMUSG00000067064	1	94376258	94377196
Olfr1415	ENSMUSG00000057464	1	94387395	94388330
Olfr1414	ENSMUSG00000042849	1	94407625	94415092
Olfr1413	ENSMUSG00000058904	1	94469702	94470783
Olfr1412	ENSMUSG00000046300	1	94484909	94485874
Olfr1411	ENSMUSG00000062497	1	94493098	94494069
Olfr1410	ENSMUSG00000063583	1	94504416	94505424
Olfr12	ENSMUSG00000061616	1	94516458	94517578
Myeov2	ENSMUSG00000073616	1	94533722	94538562
Otos	ENSMUSG00000044055	1	94540795	94545418
Gpc1	ENSMUSG00000034220	1	94728222	94756775
Ankmy1	ENSMUSG00000034212	1	94766706	94799483
Dusp28	ENSMUSG00000047067	1	94803566	94805197
Rnpepl1	ENSMUSG00000026269	1	94807982	94817415
Capn10	ENSMUSG00000026270	1	94830953	94844518
Gpr35	ENSMUSG00000026271	1	94869696	94882968
Aqp12	ENSMUSG00000045091	1	94902911	94908846
Kif1a	ENSMUSG00000014602	1	94912033	94998442
Gm17672	ENSMUSG00000090847	1	95005394	95007262
Agxt	ENSMUSG00000026272	1	95031822	95041984
2310007B03Rik	ENSMUSG00000034159	1	95047926	95057525
E030010N08Rik	ENSMUSG00000084989	1	95112476	95127649
Sned1	ENSMUSG00000047793	1	95132418	95197642
Mterfd2	ENSMUSG00000026273	1	95195788	95202492
Pask	ENSMUSG00000026274	1	95205347	95240059
Ppp1r7	ENSMUSG00000026275	1	95239431	95270066
Ano7	ENSMUSG00000034107	1	95270473	95300079
Hdlbp	ENSMUSG00000034088	1	95302517	95375385
Gm17415	ENSMUSG00000090489	1	95318265	95319065
Sept2	ENSMUSG00000026276	1	95375541	95406837
Farp2	ENSMUSG00000034066	1	95408656	95518553
Stk25	ENSMUSG00000026277	1	95518479	95532299
Bok	ENSMUSG00000026278	1	95582271	95592339
Thap4	ENSMUSG00000026279	1	95601968	95651415
Atg4b	ENSMUSG00000026280	1	95648077	95686372
Dtymk	ENSMUSG00000026281	1	95689153	95698511
Ing5	ENSMUSG00000026283	1	95700542	95718678
D2hgdh	ENSMUSG00000073609	1	95721817	95748925
Gal3st2	ENSMUSG00000034005	1	95757921	95773071
Gm9994	ENSMUSG00000056307	1	95824364	95839221
Gm7889	ENSMUSG00000091067	1	95879623	95882396
Gm6086	ENSMUSG00000073608	1	95887086	95908118
Neu4	ENSMUSG00000034000	1	95917070	95924903
Pdcd1	ENSMUSG00000026285	1	95934884	95949130
Gm17386	ENSMUSG00000091447	1	96048774	96049705
5033417F24Rik	ENSMUSG00000091828	1	94804957	94807341
U6	ENSMUSG00000088961	1	95705147	95705248
U6	ENSMUSG00000064389	1	95259832	95259934
Mir149	ENSMUSG00000065470	1	94746955	94747020
AC131316.1	ENSMUSG00000093284	1	95549077	95549367
Gm13478	ENSMUSG00000083510	2	45502711	45503123
1700019E08Rik	ENSMUSG00000086202	2	45552125	45553967
Gm13465	ENSMUSG00000086710	2	45588977	45608831
Gm13467	ENSMUSG00000086830	2	45603323	45607204
Gm13466	ENSMUSG00000083807	2	45664992	45665990
Gm13469	ENSMUSG00000082679	2	46261740	46262089
Gm13470	ENSMUSG00000086644	2	46275055	46298230
SNORA17	ENSMUSG00000089144	2	46462487	46462603
U7	ENSMUSG00000088328	2	47027033	47027092
SNORA17	ENSMUSG00000088868	2	46161856	46161978
Slc38a11	ENSMUSG00000061171	2	65154487	65202091
Scn3a	ENSMUSG00000057182	2	65295175	65405684
Scn2a1	ENSMUSG00000075318	2	65458914	65605504
Csrnp3	ENSMUSG00000044647	2	65683824	65869603
Galnt3	ENSMUSG00000026994	2	65920823	65963051
Ttc21b	ENSMUSG00000034848	2	66022384	66094674
Scn1a	ENSMUSG00000064329	2	66108838	66278897
Scn9a	ENSMUSG00000075316	2	66318137	66473009
Scn7a	ENSMUSG00000034810	2	66511482	66622971
Gm13592	ENSMUSG00000083707	2	65115474	65116483
Gm13593	ENSMUSG00000080766	2	65134235	65135426
Gm13595	ENSMUSG00000086701	2	65347322	65350662
Gm13619	ENSMUSG00000052865	2	65690465	65698676
Gm13617	ENSMUSG00000085160	2	65782356	65792127
Gm13616	ENSMUSG00000080728	2	65983711	65983932
Gm13618	ENSMUSG00000086671	2	66025893	66030870
Gm13630	ENSMUSG00000085386	2	66247551	66259645
Gm13629	ENSMUSG00000087301	2	66278937	66384083
Rpl35-ps1	ENSMUSG00000080855	2	66285093	66285464
Gm13627	ENSMUSG00000081307	2	66367471	66368803
Gm13600	ENSMUSG00000081973	2	66701319	66702832
Gm13602	ENSMUSG00000082218	2	66780615	66781107
Gm13598	ENSMUSG00000086908	2	66995703	67032792
Gm1322	ENSMUSG00000075314	2	67011891	67023007
SNORA17	ENSMUSG00000088197	2	65214226	65214339
7SK	ENSMUSG00000088994	2	66440572	66440855
SNORD26	ENSMUSG00000088306	2	65966189	65966268
Xirp2	ENSMUSG00000027022	2	67284059	67364671
F830016D02Rik	ENSMUSG00000067582	2	67269281	67271973
Gm13599	ENSMUSG00000087043	2	67147716	67234548
Gm13601	ENSMUSG00000087467	2	67329101	67354582
Gm13604	ENSMUSG00000083910	2	67545347	67545828
SNORA17	ENSMUSG00000088043	2	67258088	67258219
Gm13603	ENSMUSG00000081299	2	67604034	67604116
B3galt1	ENSMUSG00000034780	2	67942728	67960746
Stk39	ENSMUSG00000027030	2	68048502	68310325
Gm13607	ENSMUSG00000081257	2	67919848	67920386
Gm13606	ENSMUSG00000081899	2	67973721	67974669
Gm13596	ENSMUSG00000085182	2	68314139	68315809
4933409G03Rik	ENSMUSG00000053896	2	68420470	68454444
Gm13597	ENSMUSG00000075312	2	68392558	68393807
7SK	ENSMUSG00000088365	2	68322200	68322441
4932414N04Rik	ENSMUSG00000079324	2	68494543	68586522
Lass6	ENSMUSG00000027035	2	68699498	68952339
Gm13612	ENSMUSG00000082836	2	68669074	68669463
Nostrin	ENSMUSG00000034738	2	68973857	69027387
Spc25	ENSMUSG00000005233	2	69031952	69044251
G6pc2	ENSMUSG00000005232	2	69049130	69065898
Abcb11	ENSMUSG00000027048	2	69076339	69180671
Dhrs9	ENSMUSG00000027068	2	69218502	69242590
Gm13613	ENSMUSG00000086819	2	69086364	69110548
Gm13614	ENSMUSG00000083592	2	69167796	69168298
AL929170.1	ENSMUSG00000093198	2	69077938	69078006
Lrp2	ENSMUSG00000027070	2	69262397	69424122
Bbs5	ENSMUSG00000063145	2	69485228	69505628
Gjd2	ENSMUSG00000068615	2	113835337	113839355
Actc1	ENSMUSG00000068614	2	113873018	113879284
Aqr	ENSMUSG00000040383	2	113926906	114012760
A530058N18Rik	ENSMUSG00000092201	2	113839299	113894060
A530058N18Rik	ENSMUSG00000087694	2	113839338	113858028
C130080G10Rik	ENSMUSG00000092397	2	113880071	113890604
Gm13972	ENSMUSG00000084785	2	114480161	114523575
Gm13975	ENSMUSG00000082997	2	114533848	114534629
Gm13974	ENSMUSG00000085222	2	114679829	114869708
Gm13973	ENSMUSG00000084222	2	114862155	114863048
4930528P14Rik	ENSMUSG00000087309	2	115155000	115170016
Gm13976	ENSMUSG00000086197	2	115170121	115172704
3110099E03Rik	ENSMUSG00000085582	2	115319249	115353480
Gm13977	ENSMUSG00000086735	2	115382522	115407291
Zfp770	ENSMUSG00000040321	2	114019197	114027205
Atpbd4	ENSMUSG00000057147	2	114342152	114480700
BC052040	ENSMUSG00000040282	2	115407452	115604504
Meis2	ENSMUSG00000027210	2	115688800	115891575
Mir1951	ENSMUSG00000088606	2	115464461	115464549
7SK	ENSMUSG00000084620	2	114095847	114096164
AL844901.1	ENSMUSG00000093299	2	115379243	115379317
2700033N17Rik	ENSMUSG00000086328	2	115891954	115893180
G630016G05Rik	ENSMUSG00000086308	2	115892961	115911647
Gm13991	ENSMUSG00000081787	2	116353579	116354226
Gm13990	ENSMUSG00000086462	2	116673835	116702904
D330050G23Rik	ENSMUSG00000085316	2	116725888	116738527
Gm13981	ENSMUSG00000074930	2	116881302	116881748
Rap1a-ps2	ENSMUSG00000081842	2	117066619	117067177
Gm13982	ENSMUSG00000085681	2	117240128	117243433
Tmco5	ENSMUSG00000027355	2	116704427	116718236
Spred1	ENSMUSG00000027351	2	116947110	117008015
Fam98b	ENSMUSG00000027349	2	117075475	117097276
Rasgrp1	ENSMUSG00000027347	2	117105729	117168737
Mir674	ENSMUSG00000076376	2	117010863	117010962
7SK	ENSMUSG00000087910	2	116788973	116789285
snoU13	ENSMUSG00000088038	2	116750174	116750283
U1	ENSMUSG00000065845	2	117074007	117074170
U1	ENSMUSG00000065794	2	116793775	116793909
Chac1	ENSMUSG00000027313	2	119176965	119180117
Ino80	ENSMUSG00000034154	2	119198778	119303423
Exd1	ENSMUSG00000048647	2	119342241	119373363
1500003O03Rik	ENSMUSG00000014077	2	119373433	119412763
Oip5	ENSMUSG00000072980	2	119435248	119444205
Nusap1	ENSMUSG00000027306	2	119444034	119476980
Ndufaf1	ENSMUSG00000027305	2	119481182	119488563
Rtf1	ENSMUSG00000027304	2	119500804	119561143
Itpka	ENSMUSG00000027296	2	119568073	119576999
Ltk	ENSMUSG00000027297	2	119577056	119586167
Rpap1	ENSMUSG00000034032	2	119589040	119613273
Tyro3	ENSMUSG00000027298	2	119623469	119643840
Gm13986	ENSMUSG00000087203	2	117683027	117936938
A930104D05Rik	ENSMUSG00000045339	2	118095969	118101905
1700054M17Rik	ENSMUSG00000085889	2	118130650	118133902
Gm13983	ENSMUSG00000084028	2	118309049	118309913
Gm14016	ENSMUSG00000080747	2	118419815	118420300
5430417L22Rik	ENSMUSG00000074918	2	118571494	118574546
Gm14091	ENSMUSG00000086421	2	118655610	118659858
Gm14089	ENSMUSG00000084802	2	118822804	118826420
Gm14088	ENSMUSG00000081413	2	118833882	118834387
Gm14138	ENSMUSG00000081572	2	119013253	119013997
Gm14175	ENSMUSG00000084015	2	119110528	119110768
Gm14207	ENSMUSG00000074912	2	119146923	119151930
Gm14208	ENSMUSG00000082369	2	119334288	119334965
1700020I14Rik	ENSMUSG00000085438	2	119420033	119433238
H3f3c	ENSMUSG00000082029	2	119491362	119491772
Gm14383	ENSMUSG00000081416	2	119494895	119495280
Gm13998	ENSMUSG00000081056	2	119703805	119704139
Eif2ak4	ENSMUSG00000005102	2	118214353	118300970
Srp14	ENSMUSG00000009549	2	118301586	118305447
Bmf	ENSMUSG00000040093	2	118354493	118375423
Bub1b	ENSMUSG00000040084	2	118423947	118467328
Pak6	ENSMUSG00000074923	2	118489039	118523756
Gm1337	ENSMUSG00000078137	2	118524839	118529699
Plcb2	ENSMUSG00000040061	2	118533253	118554174
A430105I19Rik	ENSMUSG00000045838	2	118579894	118588397
Phgr1	ENSMUSG00000046804	2	118598505	118603901
Disp2	ENSMUSG00000040035	2	118605455	118637029
D2Ertd750e	ENSMUSG00000027331	2	118639739	118679693
Ivd	ENSMUSG00000027332	2	118687690	118708645
Bahd1	ENSMUSG00000040007	2	118726113	118750264
Chst14	ENSMUSG00000074916	2	118752233	118754321
Ccdc32	ENSMUSG00000039983	2	118843515	118855129
Rpusd2	ENSMUSG00000027324	2	118860526	118865505
Casc5	ENSMUSG00000027326	2	118872855	118931237
Rad51	ENSMUSG00000027323	2	118938529	118973181
Fam82a2	ENSMUSG00000070730	2	118962737	118982770
Gchfr	ENSMUSG00000046814	2	118993509	118998126
Dnajc17	ENSMUSG00000034278	2	118998236	119034531
Gm14137	ENSMUSG00000055926	2	119000245	119003311
Zfyve19	ENSMUSG00000068580	2	119034353	119042785
Ppp1r14d	ENSMUSG00000027317	2	119043855	119055642
Spint1	ENSMUSG00000027315	2	119063098	119075263
Rhov	ENSMUSG00000034226	2	119094937	119097008
Vps18	ENSMUSG00000034216	2	119114476	119124189
Dll4	ENSMUSG00000027314	2	119151520	119161698
Mga	ENSMUSG00000033943	2	119722964	119795317
Thbs1	ENSMUSG00000040152	2	117937612	117952869
Fsip1	ENSMUSG00000027344	2	118030624	118082702
Gpr176	ENSMUSG00000040133	2	118102846	118199155
U6	ENSMUSG00000065164	2	119619678	119619779
n-R5s204	ENSMUSG00000064906	2	119456854	119456972
AL845495.1	ENSMUSG00000093368	2	118074425	118074518
SNORA44	ENSMUSG00000064722	2	119566564	119566692
5S_rRNA	ENSMUSG00000088497	2	118176974	118177067
U1	ENSMUSG00000077359	2	117903541	117903698
Mapkbp1	ENSMUSG00000033902	2	119798435	119853144
Gm13999	ENSMUSG00000087458	2	119850543	119853189
Gm13997	ENSMUSG00000087555	2	120070657	120071334
Tmem87a	ENSMUSG00000033808	2	120181045	120229852
Pla2g4b	ENSMUSG00000033852	2	119853219	119868769
Spnb5	ENSMUSG00000074899	2	119871893	119911508
Ehd4	ENSMUSG00000027293	2	119914911	119980342
Pla2g4e	ENSMUSG00000050211	2	119992148	120071071
Pla2g4d	ENSMUSG00000070719	2	120091331	120114933
Pla2g4f	ENSMUSG00000046971	2	120125693	120139901
Vps39	ENSMUSG00000027291	2	120142197	120178873
Zfp106	ENSMUSG00000027288	2	120332556	120389579
Ganc	ENSMUSG00000062646	2	120229632	120287436
Capn3	ENSMUSG00000079110	2	120281755	120330649
Gm17647	ENSMUSG00000091181	2	120308157	120308472
Gm17675	ENSMUSG00000091714	2	120358640	120365582
Gm14087	ENSMUSG00000081105	2	120376355	120376494
Snap23	ENSMUSG00000027287	2	120393407	120426991
Lrrc57	ENSMUSG00000027286	2	120429974	120435256
Haus2	ENSMUSG00000027285	2	120435119	120447296
Stard9	ENSMUSG00000033705	2	120454862	120557633
Ttbk2	ENSMUSG00000090100	2	120558552	120676340
Cdan1	ENSMUSG00000027284	2	120541890	120675864
n-R5s205	ENSMUSG00000065083	2	120466447	120466571
AV039307	ENSMUSG00000087519	2	120676441	120692425
Ubr1	ENSMUSG00000027272	2	120686005	120796451
Tmem62	ENSMUSG00000054484	2	120802753	120833588
Ccndbp1	ENSMUSG00000023572	2	120834139	120842640
U3	ENSMUSG00000065883	2	120829825	120830037
Epb4.2	ENSMUSG00000023216	2	120843627	120862808
Tgm5	ENSMUSG00000053675	2	120871847	120911577
Gm14213	ENSMUSG00000081313	2	120875535	120876302
Tgm7	ENSMUSG00000079103	2	120919301	120935531
Lcmt2	ENSMUSG00000074890	2	120954043	120966434
U6	ENSMUSG00000089009	2	120960927	120961032
Zscan29	ENSMUSG00000050619	2	120984009	120996861
Adal	ENSMUSG00000027259	2	120966164	120982416
Tubgcp4	ENSMUSG00000027263	2	120996390	121024506
Trp53bp1	ENSMUSG00000043909	2	121019017	121097143
Mtap1a	ENSMUSG00000027254	2	121115336	121136568
Ppip5k1	ENSMUSG00000033526	2	121136297	121181132
Gm14978	ENSMUSG00000087704	2	121119439	121121744
Gm14001	ENSMUSG00000082651	2	121226881	121227127
Gm14000	ENSMUSG00000084140	2	121230977	121231209
Gm14017	ENSMUSG00000081967	2	121306865	121307250
Gm14018	ENSMUSG00000084407	2	121311168	121317248
Ckmt1	ENSMUSG00000000308	2	121183450	121189473
Strc	ENSMUSG00000033498	2	121189464	121212904
Catsper2	ENSMUSG00000033486	2	121218367	121240317
Pdia3	ENSMUSG00000027248	2	121239511	121264423
Ell3	ENSMUSG00000027246	2	121264746	121270014
Serinc4	ENSMUSG00000046110	2	121264795	121282517
Serf2	ENSMUSG00000074884	2	121274931	121284049
2310003F16Rik	ENSMUSG00000027245	2	121279026	121284408
Mfap1b	ENSMUSG00000048222	2	121285971	121299803
Mfap1a	ENSMUSG00000068479	2	121317647	121332401
AL845466.1	ENSMUSG00000080374	2	121276406	121276506
Wdr76	ENSMUSG00000027242	2	121332459	121370596
Frmd5	ENSMUSG00000027238	2	121371265	121632823
Gm14021	ENSMUSG00000081264	2	121526501	121527461
Gm14020	ENSMUSG00000084244	2	121544266	121544927
Gm14019	ENSMUSG00000086913	2	121691517	121692453
Casc4	ENSMUSG00000060227	2	121692706	121761956
5S_rRNA	ENSMUSG00000087767	2	121717307	121717420
Mageb3	ENSMUSG00000074881	2	121779488	121781096
Ctdspl2	ENSMUSG00000033411	2	121781737	121839378
AL845457.1	ENSMUSG00000077967	2	121796288	121796373
AL845457.2	ENSMUSG00000093654	2	121824105	121824175
Eif3j	ENSMUSG00000027236	2	121854282	121882334
Spg11	ENSMUSG00000033396	2	121879256	121944122
Patl2	ENSMUSG00000027233	2	121945844	122011925
AA467197	ENSMUSG00000033213	2	122462722	122466927
Pldn	ENSMUSG00000005804	2	122564239	122575211
Sqrdl	ENSMUSG00000005803	2	122590973	122635305
Duoxa2	ENSMUSG00000027225	2	122124636	122128621
Duoxa1	ENSMUSG00000027224	2	122127927	122139466
Duox1	ENSMUSG00000033268	2	122141408	122173708
Shf	ENSMUSG00000033256	2	122174628	122194898
Slc28a2	ENSMUSG00000027219	2	122251126	122286873
Gm14050	ENSMUSG00000082670	2	122033656	122034001
Gm14058	ENSMUSG00000079966	2	122040356	122041090
Gm14059	ENSMUSG00000070692	2	122045646	122046140
Gm14086	ENSMUSG00000083645	2	122252930	122253205
Bambi-ps1	ENSMUSG00000081219	2	122292671	122293262
Spata5l1	ENSMUSG00000074876	2	122456361	122458666
4930417H01Rik	ENSMUSG00000087017	2	122527783	122547192
4930580A09Rik	ENSMUSG00000085633	2	122559026	122564098
Gm13989	ENSMUSG00000082050	2	123098882	123099081
Gm13988	ENSMUSG00000084372	2	123099660	123099947
Gm14085	ENSMUSG00000079071	2	122310677	122353776
Gatm	ENSMUSG00000027199	2	122420203	122437039
Slc30a4	ENSMUSG00000005802	2	122506969	122528399
B2m	ENSMUSG00000060802	2	121973422	121978819
Trim69	ENSMUSG00000033368	2	121986436	122004763
4933406J08Rik	ENSMUSG00000027229	2	122012008	122032133
Sord	ENSMUSG00000027227	2	122060485	122091076
Duox2	ENSMUSG00000068452	2	122104983	122124185
U1	ENSMUSG00000088506	2	122211225	122211376
Mir147	ENSMUSG00000076309	2	122466539	122466617
Shc4	ENSMUSG00000035109	2	125453183	125549884
Eid1	ENSMUSG00000091337	2	125498831	125500521
Secisbp2l	ENSMUSG00000035093	2	125562722	125608606
Cops2	ENSMUSG00000027206	2	125656040	125684875
Galk2	ENSMUSG00000027207	2	125684845	125810035
Sema6d	ENSMUSG00000027200	2	123915705	124493506
Gm17555	ENSMUSG00000090353	2	124657023	124658522
Slc24a5	ENSMUSG00000035183	2	124893860	124914413
Myef2	ENSMUSG00000027201	2	124910364	124949397
Ctxn2	ENSMUSG00000074872	2	124962428	124973575
Slc12a1	ENSMUSG00000027202	2	124978241	125055738
Gm9913	ENSMUSG00000053615	2	125330825	125333617
Cep152	ENSMUSG00000068394	2	125388824	125450849
4930517E11Rik	ENSMUSG00000085496	2	123949372	123955692
4930583P06Rik	ENSMUSG00000086954	2	124043415	124048067
Gm13994	ENSMUSG00000087450	2	124534391	124536819
Gm14004	ENSMUSG00000087056	2	124950092	124960063
Gm14002	ENSMUSG00000086416	2	125033265	125043248
A530010F05Rik	ENSMUSG00000085797	2	125100300	125102908
Gm14003	ENSMUSG00000087682	2	125108424	125109714
Eid1	ENSMUSG00000078135	2	125498863	125499837
Fbn1	ENSMUSG00000027204	2	125126330	125333729
Dut	ENSMUSG00000027203	2	125072926	125084344
U6	ENSMUSG00000065851	2	124930745	124930851
4930525F21Rik	ENSMUSG00000027209	2	125809219	125977740
Fgf7	ENSMUSG00000027208	2	125860394	125916921
U6	ENSMUSG00000065084	2	125935644	125935750
Dtwd1	ENSMUSG00000023330	2	125977877	125991015
7SK	ENSMUSG00000089480	2	126094808	126095099
Atp8b4	ENSMUSG00000060131	2	126146709	126326410
Nphp1	ENSMUSG00000027378	2	127566468	127614633
Mrps5	ENSMUSG00000027374	2	127412958	127432565
Gm16762	ENSMUSG00000085076	2	126346938	126379398
Bub1	ENSMUSG00000027379	2	127626858	127657601
Hdc	ENSMUSG00000027360	2	126419403	126445035
Gabpb1	ENSMUSG00000027361	2	126453178	126502073
Slc27a2	ENSMUSG00000027359	2	126378143	126413979
Dusp2	ENSMUSG00000027368	2	127161895	127164112
Usp8	ENSMUSG00000027363	2	126533064	126585033
Astl	ENSMUSG00000050468	2	127164375	127183387
Fahd2a	ENSMUSG00000027371	2	127261951	127270301
Kcnip3	ENSMUSG00000079056	2	127282234	127347830
Gm17601	ENSMUSG00000090815	2	127343028	127343545
Prom2	ENSMUSG00000027376	2	127352209	127367203
Gm14212	ENSMUSG00000081894	2	126690239	126691064
Gm14229	ENSMUSG00000083648	2	127394313	127395162
Gm14245	ENSMUSG00000084006	2	127514141	127515983
Gm14244	ENSMUSG00000087162	2	127517635	127526224
1500011K16Rik	ENSMUSG00000051319	2	127617124	127618224
Gm14009	ENSMUSG00000085750	2	128015723	128030370
Gm14005	ENSMUSG00000074813	2	128021729	128255085
Gm10766	ENSMUSG00000074822	2	127095445	127095768
Stard7	ENSMUSG00000027367	2	127095954	127124670
Acoxl	ENSMUSG00000027380	2	127664612	127949609
Bcl2l11	ENSMUSG00000027381	2	127951774	127988283
Tmem127	ENSMUSG00000034850	2	127073644	127086843
Mal	ENSMUSG00000027375	2	127458962	127482431
Mall	ENSMUSG00000027377	2	127530122	127555668
Usp50	ENSMUSG00000027364	2	126534832	126609196
Gm10774	ENSMUSG00000074846	2	126535090	126535293
Trpm7	ENSMUSG00000027365	2	126617301	126701966
2010106G01Rik	ENSMUSG00000027366	2	126716127	126758971
Ap4e1	ENSMUSG00000001998	2	126834453	126893645
Blvra	ENSMUSG00000001999	2	126896401	126922820
Ncaph	ENSMUSG00000034906	2	126929545	126959690
Adra2b	ENSMUSG00000058620	2	127188944	127192957
Gpat2	ENSMUSG00000046338	2	127250935	127261828
Itpripl1	ENSMUSG00000074825	2	126964508	126969178
1810024B03Rik	ENSMUSG00000044145	2	127012091	127034016
Snrnp200	ENSMUSG00000003660	2	127034122	127066187
Ciao1	ENSMUSG00000003662	2	127066674	127073552
Zfp661	ENSMUSG00000034800	2	127400398	127412830
AL844481.1	ENSMUSG00000093203	2	127717724	127717849
SNORA55	ENSMUSG00000089264	2	127503406	127503463
AL928590.1	ENSMUSG00000092918	2	126866297	126866421
7SK	ENSMUSG00000084628	2	127298753	127299044
U1	ENSMUSG00000088200	2	126460275	126460423
U1	ENSMUSG00000088175	2	127915660	127915796
Ckap2l	ENSMUSG00000048327	2	129093946	129122948
Il1a	ENSMUSG00000027399	2	129125346	129135708
Il1b	ENSMUSG00000027398	2	129190306	129196875
F830045P16Rik	ENSMUSG00000043727	2	129284095	129362338
Sirpa	ENSMUSG00000037902	2	129418571	129457964
Pdyn	ENSMUSG00000027400	2	129512301	129525580
Stk35	ENSMUSG00000037885	2	129626253	129658023
Tgm3	ENSMUSG00000027401	2	129838085	129876135
Tgm6	ENSMUSG00000027403	2	129938152	129979968
Snrpb	ENSMUSG00000027404	2	129997150	130005139
Tmc2	ENSMUSG00000060332	2	130020930	130090181
Nop56	ENSMUSG00000027405	2	130100166	130105049
Idh3b	ENSMUSG00000027406	2	130105045	130110283
Zc3h8	ENSMUSG00000027387	2	128752004	128769813
Gm10762	ENSMUSG00000074807	2	128792329	128793461
Zc3h6	ENSMUSG00000042851	2	128793138	128844299
Gm14025	ENSMUSG00000079051	2	128863881	128873908
Ttl	ENSMUSG00000027394	2	128891678	128922019
Polr1b	ENSMUSG00000027395	2	128926731	128952330
Chchd5	ENSMUSG00000037938	2	128955436	128959870
Slc20a1	ENSMUSG00000027397	2	129024500	129037352
Gm14010	ENSMUSG00000079053	2	128249390	128250301
Gm14006	ENSMUSG00000082671	2	128382990	128383942
Gm14008	ENSMUSG00000082350	2	128413631	128413904
Gm14007	ENSMUSG00000080789	2	128432721	128432930
Gm14011	ENSMUSG00000085036	2	128577007	128579441
Gm14028	ENSMUSG00000082339	2	128778708	128779186
4933427J07Rik	ENSMUSG00000087267	2	128781407	128783597
Gm14027	ENSMUSG00000090248	2	128842688	128847492
Gm14022	ENSMUSG00000087151	2	128886682	128891422
AI847159	ENSMUSG00000084826	2	128984402	129006403
Gm14026	ENSMUSG00000082274	2	128994436	128996224
Gm14029	ENSMUSG00000086652	2	129008218	129009683
9830144P21Rik	ENSMUSG00000087528	2	129031694	129056315
A730036I17Rik	ENSMUSG00000056738	2	129044705	129061340
Gm14024	ENSMUSG00000085485	2	129072112	129094262
Gm14023	ENSMUSG00000085498	2	129123106	129133562
Gm14039	ENSMUSG00000082097	2	129188495	129188595
Gm14047	ENSMUSG00000074805	2	129195633	129201484
Gm14045	ENSMUSG00000081888	2	129204007	129205132
Gm14040	ENSMUSG00000086637	2	129319306	129341543
Gm14041	ENSMUSG00000087015	2	129390783	129391804
Gm14046	ENSMUSG00000084328	2	129575637	129576145
Gm14043	ENSMUSG00000083589	2	129599432	129599659
AU015228	ENSMUSG00000074804	2	129926130	129929111
Mertk	ENSMUSG00000014361	2	128524692	128628630
Tmem87b	ENSMUSG00000014353	2	128643854	128679997
Fbln7	ENSMUSG00000027386	2	128688717	128722770
Gm355	ENSMUSG00000074812	2	128416945	128424200
Anapc1	ENSMUSG00000014355	2	128435840	128513127
Snord57	ENSMUSG00000065272	2	130103752	130103823
U12	ENSMUSG00000065057	2	129141065	129141215
SNORA25	ENSMUSG00000087785	2	128606112	128606235
AL833804.1	ENSMUSG00000093645	2	130102931	130103016
Snord110	ENSMUSG00000080610	2	130101242	130101309
SNORA51	ENSMUSG00000065287	2	130101973	130102105
SNORA17	ENSMUSG00000077348	2	129911777	129911905
SNORA17	ENSMUSG00000089152	2	129897460	129897546
SNORD56	ENSMUSG00000065289	2	130103433	130103502
AL833780.1	ENSMUSG00000092719	2	128751307	128751428
Ebf4	ENSMUSG00000053552	2	130120905	130196217
Ptpra	ENSMUSG00000027303	2	130276014	130380036
Fam113a	ENSMUSG00000037773	2	130242983	130250437
4933425O20Rik	ENSMUSG00000049692	2	130232214	130233635
Vps16	ENSMUSG00000027411	2	130250075	130270005
Gm14044	ENSMUSG00000083483	2	130210581	130211086
Gm14042	ENSMUSG00000082985	2	130226173	130227005
1700020A23Rik	ENSMUSG00000027409	2	130230995	130231810
Cpxm1	ENSMUSG00000027408	2	130216511	130223310
Mrps26	ENSMUSG00000037740	2	130389478	130394431
Oxt	ENSMUSG00000027301	2	130401909	130402790
Avp	ENSMUSG00000037727	2	130406356	130408290
Ubox5	ENSMUSG00000027300	2	130415738	130455774
Fastkd5	ENSMUSG00000079043	2	130439576	130455763
Prosapip1	ENSMUSG00000037703	2	130458575	130468539
Ddrgk1	ENSMUSG00000068290	2	130479696	130490395
Itpa	ENSMUSG00000074797	2	130493346	130507350
Slc4a11	ENSMUSG00000074796	2	130509849	130523255
4930402H24Rik	ENSMUSG00000027309	2	130531936	130732142
4930473A02Rik	ENSMUSG00000060029	2	130369527	130389485
AL731707.1	ENSMUSG00000077004	2	130357414	130357480
7SK	ENSMUSG00000084694	2	130531064	130531432
Gm14057	ENSMUSG00000089662	2	130629237	130629718
Atrn	ENSMUSG00000027312	2	130732231	130856069
A730017L22Rik	ENSMUSG00000085566	2	130698795	130732132
Gm14048	ENSMUSG00000080989	2	130706602	130707869
4930529M08Rik	ENSMUSG00000037143	2	145760520	146040775
Insm1	ENSMUSG00000068154	2	146047657	146050752
Ralgapa2	ENSMUSG00000037110	2	146065615	146337762
Plk1s1	ENSMUSG00000074749	2	146681600	146795833
Xrn2	ENSMUSG00000027433	2	146838732	146903736
Nkx2-4	ENSMUSG00000054160	2	146909052	146911181
Nkx2-2	ENSMUSG00000027434	2	147003282	147019979
Pax1	ENSMUSG00000037034	2	147187661	147219031
Foxa2	ENSMUSG00000037025	2	147868613	147872705
A930019D19Rik	ENSMUSG00000085958	2	146085022	146092896
Gm14117	ENSMUSG00000042938	2	146131283	146132125
4933406D12Rik	ENSMUSG00000085796	2	146368667	146371844
Gm14111	ENSMUSG00000080870	2	146580443	146581441
Gm14114	ENSMUSG00000087618	2	146654063	146665468
Gm14116	ENSMUSG00000082158	2	146972144	146972948
Nkx2-2as	ENSMUSG00000086509	2	147009819	147157417
6430503K07Rik	ENSMUSG00000053545	2	147013160	147014143
Gm14115	ENSMUSG00000081971	2	147106339	147106820
Gm14113	ENSMUSG00000084371	2	147115491	147116466
Gm14110	ENSMUSG00000084774	2	147149298	147150823
AI646519	ENSMUSG00000087521	2	147187277	147188145
Gm14109	ENSMUSG00000083126	2	147228690	147228998
Gm14107	ENSMUSG00000080844	2	147468584	147468913
Gm14106	ENSMUSG00000081741	2	147493751	147494188
A530006G24Rik	ENSMUSG00000051986	2	147536429	147543368
9030622O22Rik	ENSMUSG00000086141	2	147770476	147865939
Gm14108	ENSMUSG00000083750	2	147897082	147897575
U6	ENSMUSG00000065791	2	147700508	147700614
7SK	ENSMUSG00000089316	2	147076198	147076521
U3	ENSMUSG00000087901	2	146369234	146369361
Gm5844	ENSMUSG00000082896	3	17908806	17910996
Gm6369	ENSMUSG00000040217	3	18433861	18434289
Gm16093	ENSMUSG00000087108	3	19127780	19140987
Gm6141	ENSMUSG00000084339	3	19484791	19485538
Dnajc5b	ENSMUSG00000027606	3	19408595	19510862
Gm10742	ENSMUSG00000074674	3	17683514	17686898
Cypt12	ENSMUSG00000027564	3	17848444	17848952
Bhlhe22	ENSMUSG00000025128	3	17954325	17957509
Cyp7b1	ENSMUSG00000039519	3	17971950	18143338
Armc1	ENSMUSG00000027599	3	19032146	19063065
Mtfr1	ENSMUSG00000027601	3	19087327	19120817
Pde7a	ENSMUSG00000069094	3	19123108	19211322
1700064H15Rik	ENSMUSG00000082766	3	19510368	19528677
Trim55	ENSMUSG00000060913	3	19544460	19591599
Crh	ENSMUSG00000049796	3	19593401	19595396
U1	ENSMUSG00000065175	3	19460253	19460416
Mir124a-2	ENSMUSG00000093073	3	17695662	17695770
U6atac	ENSMUSG00000087893	3	17703621	17703747
U1	ENSMUSG00000064594	3	18077462	18077625
7SK	ENSMUSG00000089149	3	19230773	19231084
Gyg	ENSMUSG00000019528	3	20021970	20055216
Hps3	ENSMUSG00000027615	3	19895945	19935315
Hps3	ENSMUSG00000078774	3	19916917	19924958
Hltf	ENSMUSG00000002428	3	19957811	20018376
Cpa3	ENSMUSG00000001865	3	20115516	20142080
Cpb1	ENSMUSG00000011463	3	20148163	20174655
Agtr1b	ENSMUSG00000054988	3	20213395	20266099
4632415L05Rik	ENSMUSG00000048106	3	19794886	19795962
Cp	ENSMUSG00000003617	3	19857054	19909145
Gm15462	ENSMUSG00000086189	3	30585007	30591288
Gm15496	ENSMUSG00000085953	3	31184509	31215813
Kcnmb3	ENSMUSG00000091091	3	32371243	32390891
Phc3	ENSMUSG00000037652	3	30798217	30868337
Prkci	ENSMUSG00000037643	3	30894669	30951663
Skil	ENSMUSG00000027660	3	30993980	31021499
Cldn11	ENSMUSG00000037625	3	31048868	31063246
Slc7a14	ENSMUSG00000069072	3	31101832	31209300
Kcnmb2	ENSMUSG00000037610	3	31801429	32099102
Zmat3	ENSMUSG00000027663	3	32233718	32264600
4930429B21Rik	ENSMUSG00000049507	3	32264697	32266358
Pik3ca	ENSMUSG00000027665	3	32296593	32367408
Arpm1	ENSMUSG00000037737	3	30495995	30498861
Mynn	ENSMUSG00000037730	3	30501009	30517414
Lrrc34	ENSMUSG00000027702	3	30523189	30546791
Lrriq4	ENSMUSG00000027703	3	30543429	30571353
Lrrc31	ENSMUSG00000074653	3	30577980	30598765
Samd7	ENSMUSG00000051860	3	30645215	30666096
Zfp639	ENSMUSG00000027667	3	32414217	32419607
Mfn1	ENSMUSG00000027668	3	32428387	32478161
Gnb4	ENSMUSG00000027669	3	32479254	32515507
Sec62	ENSMUSG00000027706	3	30691798	30720185
Gpr160	ENSMUSG00000037661	3	30754872	30796114
Gm15574	ENSMUSG00000081883	3	32778933	32779530
4930419G24Rik	ENSMUSG00000087625	3	32923699	32987529
Ndufb5	ENSMUSG00000027673	3	32635912	32650488
Usp13	ENSMUSG00000056900	3	32716468	32836993
Pex5l	ENSMUSG00000027674	3	32848553	33042169
Actl6a	ENSMUSG00000027671	3	32607468	32625890
Mrpl47	ENSMUSG00000037531	3	32624319	32636069
Ttc14	ENSMUSG00000027677	3	33698877	33713782
Ccdc39	ENSMUSG00000027676	3	33711284	33743232
U4	ENSMUSG00000084665	3	32910880	32911036
SNORA48	ENSMUSG00000088260	3	33291979	33292121
SNORA17	ENSMUSG00000077559	3	33857991	33858122
Gm9791	ENSMUSG00000044434	3	33903939	33904385
Fxr1	ENSMUSG00000027680	3	33919001	33968264
Sox2ot	ENSMUSG00000090828	3	34003360	34581541
Gm5708	ENSMUSG00000092249	3	34082229	34083114
Gm20446	ENSMUSG00000092196	3	34197440	34221211
Gm20514	ENSMUSG00000092355	3	34223741	34250637
Gm20515	ENSMUSG00000092242	3	34326295	34334019
Dnajc19	ENSMUSG00000027679	3	33954942	33980243
Sox2	ENSMUSG00000074637	3	34548927	34551383
Mir1897	ENSMUSG00000084530	3	34537386	34537464
AC137708.1	ENSMUSG00000093307	3	34489443	34489530
Gm15952	ENSMUSG00000085655	3	35831967	35841639
A330050B17Rik	ENSMUSG00000086392	3	35898755	35924028
Gm11548	ENSMUSG00000085320	3	36398726	36405731
Gm11549	ENSMUSG00000085007	3	36413979	36420735
Gm11550	ENSMUSG00000083388	3	36438305	36439003
Gm12377	ENSMUSG00000082548	3	36593724	36593975
Gm12376	ENSMUSG00000084027	3	36723274	36723880
Dcun1d1	ENSMUSG00000027708	3	35791900	35836367
Atp11b	ENSMUSG00000037400	3	35653056	35755196
Mccc1	ENSMUSG00000027709	3	35858234	35899600
Ccdc144b	ENSMUSG00000047696	3	35906169	35952469
Acad9	ENSMUSG00000027710	3	35964901	35993866
D3Ertd254e	ENSMUSG00000033883	3	36058444	36065142
Qrfpr	ENSMUSG00000058400	3	36078346	36121197
Anxa5	ENSMUSG00000027712	3	36347847	36374765
1810062G17Rik	ENSMUSG00000027713	3	36375057	36380898
Exosc9	ENSMUSG00000027714	3	36451528	36464651
Ccna2	ENSMUSG00000027715	3	36463788	36471072
Bbs7	ENSMUSG00000037325	3	36472064	36512399
Trpc3	ENSMUSG00000027716	3	36519404	36589089
4932438A13Rik	ENSMUSG00000037270	3	36762028	36951955
AC158547.1	ENSMUSG00000093499	3	35224536	35224627
U6	ENSMUSG00000064834	3	35634295	35634399
Gm12531	ENSMUSG00000086090	3	36951137	36958957
Gm12582	ENSMUSG00000081705	3	36976577	36977273
Gm12583	ENSMUSG00000082878	3	37007096	37007948
Gm12584	ENSMUSG00000083857	3	37015656	37016760
Gm12532	ENSMUSG00000084754	3	37081807	37087515
Gm13621	ENSMUSG00000081634	3	37098901	37099901
Gm12533	ENSMUSG00000083575	3	37114762	37114899
Gm12534	ENSMUSG00000086517	3	37130255	37131391
Gm12540	ENSMUSG00000083353	3	37225994	37226312
Gm12541	ENSMUSG00000054779	3	37234254	37248662
Gm12563	ENSMUSG00000083696	3	37380414	37380515
Gm12564	ENSMUSG00000080723	3	37455105	37455425
Gm12565	ENSMUSG00000081093	3	37498346	37498994
4930594O21Rik	ENSMUSG00000085677	3	37512835	37514198
Gm15450	ENSMUSG00000063001	3	37613662	37614100
Gm7799	ENSMUSG00000087457	3	37858534	37859009
Adad1	ENSMUSG00000027719	3	36962449	37020846
Il2	ENSMUSG00000027720	3	37019445	37024881
Il21	ENSMUSG00000027718	3	37121681	37131540
Cetn4	ENSMUSG00000045031	3	37206671	37211630
Spry1	ENSMUSG00000037211	3	37538869	37543520
Rpl21-ps10	ENSMUSG00000064315	3	38006330	38006877
Ankrd50	ENSMUSG00000044864	3	38348183	38383766
Gm5148	ENSMUSG00000058174	3	37613112	37623412
Fgf2	ENSMUSG00000037225	3	37211441	37304299
Bbs12	ENSMUSG00000051444	3	37211476	37220375
Nudt6	ENSMUSG00000050174	3	37303832	37319133
Spata5	ENSMUSG00000027722	3	37318818	37478018
AL691478.1	ENSMUSG00000076974	3	37155706	37155815
AC162799.1	ENSMUSG00000092986	3	38166760	38167006
SNORA17	ENSMUSG00000077728	3	37894027	37894157
SNORA17	ENSMUSG00000089123	3	37701466	37701574
AC114901.1	ENSMUSG00000076385	3	38457031	38457136
C230034O21Rik	ENSMUSG00000086181	3	38773492	38787181
Gm9845	ENSMUSG00000050533	3	39257180	39257827
Fat4	ENSMUSG00000046743	3	38785862	38910907
n-R5s195	ENSMUSG00000064825	3	39534886	39535004
U1	ENSMUSG00000065945	3	39565210	39565369
SNORA17	ENSMUSG00000089520	3	39698554	39698638
D3Ertd751e	ENSMUSG00000025766	3	41546533	41563311
Phf17	ENSMUSG00000025764	3	41359656	41420784
Sclt1	ENSMUSG00000059834	3	41430639	41546436
7SK	ENSMUSG00000089251	3	43729491	43729786
Pcdh10	ENSMUSG00000049100	3	45182320	45238488
2610316D01Rik	ENSMUSG00000086101	3	45084362	45182182
U6	ENSMUSG00000088535	3	44787122	44787226
U1	ENSMUSG00000064579	3	45621658	45621820
U6	ENSMUSG00000089584	3	45782500	45782617
Pabpc4l	ENSMUSG00000090919	3	46246119	46251863
SNORA17	ENSMUSG00000077256	3	46093755	46093886
Gm10356	ENSMUSG00000072387	3	46854304	46855563
1700018B24Rik	ENSMUSG00000037910	3	48409654	48413023
U1	ENSMUSG00000065018	3	48758644	48758807
SNORA17	ENSMUSG00000088739	3	47004549	47004686
U6	ENSMUSG00000065381	3	49462685	49462791
SNORA66	ENSMUSG00000084517	3	49295273	49295400
4930577N17Rik	ENSMUSG00000087440	3	51081493	51083727
Pcdh18	ENSMUSG00000037892	3	49547218	49561238
Slc7a11	ENSMUSG00000027737	3	50168858	50247535
Ccrn4l	ENSMUSG00000023087	3	51028369	51055566
Elf2	ENSMUSG00000037174	3	51059153	51144580
AC161183.1	ENSMUSG00000077420	3	51101101	51101166
SNORA17	ENSMUSG00000089079	3	50642503	50642637
U6atac	ENSMUSG00000089150	3	50356865	50356959
4930583H14Rik	ENSMUSG00000037161	3	51192337	51200660
Ndufc1	ENSMUSG00000037152	3	51208599	51212910
Naa15	ENSMUSG00000063273	3	51219938	51279907
Rab33b	ENSMUSG00000027739	3	51287888	51299827
Setd7	ENSMUSG00000037111	3	51319241	51364800
Gm16206	ENSMUSG00000085174	3	53256541	53261719
Gm5641	ENSMUSG00000069014	3	54285388	54286461
2810046L04Rik	ENSMUSG00000049504	3	53267588	53285677
Stoml3	ENSMUSG00000027744	3	53292649	53312424
Frem2	ENSMUSG00000037016	3	53317861	53461277
Gm10985	ENSMUSG00000078742	3	53649008	53649200
Ufm1	ENSMUSG00000074598	3	53657301	53658908
Ufm1	ENSMUSG00000027746	3	53659134	53667752
Trpc4	ENSMUSG00000027748	3	53959979	54122389
Postn	ENSMUSG00000027750	3	54165031	54194961
Gm10293	ENSMUSG00000070490	3	52416707	52417938
Cog6	ENSMUSG00000027742	3	52786045	52821145
Lhfp	ENSMUSG00000048332	3	52845450	53065601
Nhlrc3	ENSMUSG00000042997	3	53252510	53267245
SNORA17	ENSMUSG00000087936	3	53315924	53316048
U6	ENSMUSG00000065926	3	52526571	52526677
U6	ENSMUSG00000088653	3	53647329	53647431
Gm17452	ENSMUSG00000092143	4	146120857	146399068
Angptl7	ENSMUSG00000028989	4	147869292	147874569
Exosc10	ENSMUSG00000017264	4	147932538	147956510
Srm	ENSMUSG00000006442	4	147965612	147969102
Masp2	ENSMUSG00000028979	4	147976663	147989608
Tardbp	ENSMUSG00000041459	4	147986491	148001128
Gm13150	ENSMUSG00000086147	4	146346085	146364864
Rex2	ENSMUSG00000067919	4	146395959	146434903
Gm13139	ENSMUSG00000067916	4	146506147	146554688
Gm13151	ENSMUSG00000078498	4	146679783	146707843
Gm13145	ENSMUSG00000078497	4	146735412	146765113
Gm13152	ENSMUSG00000078496	4	146866526	146887595
Gm16503	ENSMUSG00000078160	4	146914327	146917609
Gm13154	ENSMUSG00000065999	4	146927386	146959307
2610305D13Rik	ENSMUSG00000066000	4	146986046	147052416
Zfp534	ENSMUSG00000062518	4	147047611	147076662
Gm13157	ENSMUSG00000078495	4	147128083	147183895
Zfp933	ENSMUSG00000059423	4	147197095	147222475
Miip	ENSMUSG00000029022	4	147234887	147242925
Fv1	ENSMUSG00000070583	4	147243088	147244467
Mfn2	ENSMUSG00000029020	4	147247708	147278813
Plod1	ENSMUSG00000019055	4	147283862	147310876
2510039O18Rik	ENSMUSG00000044496	4	147315004	147321423
Nppb	ENSMUSG00000029019	4	147359897	147361314
Nppa	ENSMUSG00000041616	4	147374831	147376188
Clcn6	ENSMUSG00000029016	4	147378368	147412930
Mthfr	ENSMUSG00000029009	4	147413186	147433660
Agtrap	ENSMUSG00000029007	4	147451170	147462140
2610109H07Rik	ENSMUSG00000029005	4	147472546	147504807
Mad2l2	ENSMUSG00000029003	4	147504493	147519808
Fbxo6	ENSMUSG00000055401	4	147519825	147526249
Fbxo44	ENSMUSG00000029001	4	147526909	147534591
Fbxo2	ENSMUSG00000041556	4	147534730	147540533
Ptchd2	ENSMUSG00000041544	4	147614373	147662074
Gm572	ENSMUSG00000070577	4	148017426	148045681
Casz1	ENSMUSG00000028977	4	148178538	148328998
Gm16889	ENSMUSG00000084976	4	146392344	146866310
Gm17317	ENSMUSG00000091833	4	146510387	146831128
Ubiad1	ENSMUSG00000047719	4	147808604	147818880
Mtor	ENSMUSG00000028991	4	147822720	147931792
Gm13140	ENSMUSG00000083027	4	146316585	146319934
Gm13149	ENSMUSG00000081260	4	146322269	146322607
Gm13153	ENSMUSG00000083704	4	146414794	146415430
4933438K21Rik	ENSMUSG00000093617	4	146437475	146442545
Gm13160	ENSMUSG00000081075	4	146460095	146461249
Gm13142	ENSMUSG00000081405	4	146476436	146478090
Gm13162	ENSMUSG00000082779	4	146499365	146499925
Gm13146	ENSMUSG00000084002	4	146561817	146562596
Gm13163	ENSMUSG00000082176	4	146568985	146569320
Gm13147	ENSMUSG00000087207	4	146604393	146633447
Gm13158	ENSMUSG00000081627	4	146641482	146642217
Gm13135	ENSMUSG00000082925	4	146650085	146653205
Gm13144	ENSMUSG00000082150	4	146655555	146655899
Gm8178	ENSMUSG00000081140	4	146753038	146753683
Gm13161	ENSMUSG00000082248	4	146817580	146818138
Gm15951	ENSMUSG00000081301	4	146894577	146894976
Gm13141	ENSMUSG00000082599	4	146901828	146902283
Gm13155	ENSMUSG00000081371	4	146998349	146998994
Gm16211	ENSMUSG00000086130	4	147042627	147044963
Gm13137	ENSMUSG00000082944	4	147106897	147107241
Gm13136	ENSMUSG00000081179	4	147109586	147112535
Gm13148	ENSMUSG00000083642	4	147119926	147120670
RP23-406N5.8	ENSMUSG00000093594	4	147156428	147183949
Rps19-ps3	ENSMUSG00000080059	4	147195886	147196335
Gm13156	ENSMUSG00000083340	4	147267782	147268102
Gm13054	ENSMUSG00000086806	4	147375200	147378123
Gm13207	ENSMUSG00000083473	4	147405663	147406435
Gm13202	ENSMUSG00000081726	4	147442140	147442601
Gm13201	ENSMUSG00000078494	4	147445716	147449529
Gm13206	ENSMUSG00000087027	4	147680962	147690678
Gm13200	ENSMUSG00000086326	4	147730488	147733569
Gm13204	ENSMUSG00000082860	4	147943165	147943985
Gm13209	ENSMUSG00000087217	4	147958830	147960116
Gm13203	ENSMUSG00000087273	4	148087812	148090690
Gm15969	ENSMUSG00000086766	4	148287620	148288433
AL607145.1	ENSMUSG00000076356	4	148239070	148239159
U6	ENSMUSG00000088625	4	147929806	147929913
U1	ENSMUSG00000064648	4	147817443	147817594
U6	ENSMUSG00000089081	4	147913236	147913339
Gm13205	ENSMUSG00000086606	4	148321601	148323023
Pex14	ENSMUSG00000028975	4	148334644	148473985
Dffa	ENSMUSG00000028974	4	148478255	148494756
Cort	ENSMUSG00000028971	4	148499143	148500872
Apitd1	ENSMUSG00000073705	4	148501230	148511738
Pgd	ENSMUSG00000028961	4	148524100	148540880
Kif1b	ENSMUSG00000063077	4	148550428	148681802
Gm17029	ENSMUSG00000086740	4	148334406	148358780
Gm9506	ENSMUSG00000081086	4	148470492	148470811
Rpsa-ps12	ENSMUSG00000080746	4	148516541	148517576
Pitpnb	ENSMUSG00000050017	5	111759783	111817379
Mn1	ENSMUSG00000070576	5	111846382	111886053
C130026L21Rik	ENSMUSG00000052848	5	112010442	112016965
4930522L14Rik	ENSMUSG00000072762	5	110165009	110180905
Gm15446	ENSMUSG00000090015	5	110352419	110372955
Zfp932	ENSMUSG00000066613	5	110425540	110439430
Gm17655	ENSMUSG00000090963	5	110475251	110475505
Plcxd1	ENSMUSG00000064247	5	110528988	110534972
Gtpbp6	ENSMUSG00000033434	5	110532994	110537216
Zfp605	ENSMUSG00000023284	5	110539111	110560756
Chfr	ENSMUSG00000014668	5	110564859	110600991
Golga3	ENSMUSG00000029502	5	110605720	110655489
Ankle2	ENSMUSG00000029501	5	110660060	110685666
Pgam5	ENSMUSG00000029500	5	110688149	110698932
Pxmp2	ENSMUSG00000029499	5	110703301	110715205
Pole	ENSMUSG00000007080	5	110715325	110766493
P2rx2	ENSMUSG00000029503	5	110768831	110772168
Gm1679	ENSMUSG00000072754	5	110783115	110785106
Fbrsl1	ENSMUSG00000043323	5	110790773	110877522
Galnt9	ENSMUSG00000033316	5	110973364	111050401
Noc4l	ENSMUSG00000033294	5	111077437	111082436
Ddx51	ENSMUSG00000029504	5	111082470	111089515
Ep400	ENSMUSG00000029505	5	111093392	111199736
Pus1	ENSMUSG00000029507	5	111202686	111209678
Ulk1	ENSMUSG00000029512	5	111213507	111239116
Hscb	ENSMUSG00000043510	5	111258089	111268796
Chek2	ENSMUSG00000029521	5	111269036	111303152
Gm17724	ENSMUSG00000090661	5	110814854	110817092
1010001B22Rik	ENSMUSG00000091434	5	110424530	110425417
Gm16739	ENSMUSG00000085131	5	110351668	110352500
Gm8508	ENSMUSG00000049477	5	110186541	110186950
Gm15484	ENSMUSG00000081865	5	110547041	110547868
Gm15787	ENSMUSG00000086247	5	110583419	110605523
Gm15788	ENSMUSG00000087439	5	110691180	110706286
Gm15791	ENSMUSG00000081256	5	110757223	110757541
Gm15792	ENSMUSG00000085606	5	110760225	110762222
A630023P12Rik	ENSMUSG00000048215	5	110943942	110954999
Gm15559	ENSMUSG00000086401	5	111199968	111208279
Ttc28	ENSMUSG00000033209	5	111308822	111718800
Gm15989	ENSMUSG00000081104	5	111334263	111334760
Gm15988	ENSMUSG00000083771	5	111437499	111437865
Gm16728	ENSMUSG00000087494	5	110688182	110698866
Gm17598	ENSMUSG00000091066	5	111208901	111210146
U6	ENSMUSG00000065775	5	111106143	111106249
SNORA49	ENSMUSG00000077254	5	111121068	111121200
U6	ENSMUSG00000065071	5	111186104	111186210
Mir701	ENSMUSG00000076163	5	111433163	111433271
SNORA70	ENSMUSG00000087722	5	110757051	110757202
E130006D01Rik	ENSMUSG00000085271	5	112163304	112190745
Gm16019	ENSMUSG00000085919	5	112171869	112177196
Miat	ENSMUSG00000086878	5	112642248	112657968
Cryba4	ENSMUSG00000066975	5	112675513	112681538
Crybb1	ENSMUSG00000029343	5	112684835	112698605
Tpst2	ENSMUSG00000029344	5	112705711	112744381
Tfip11	ENSMUSG00000029345	5	112755378	112767093
Srrd	ENSMUSG00000029346	5	112766412	112772060
Hps4	ENSMUSG00000042328	5	112772103	112807434
Gm6583	ENSMUSG00000051503	5	112782821	112785053
Asphd2	ENSMUSG00000029348	5	112814468	112821233
Sez6l	ENSMUSG00000058153	5	112848180	113006205
RP23-459I1.1	ENSMUSG00000093637	5	112803389	112806659
Gm6588	ENSMUSG00000072722	5	112878446	112880758
Myo18b	ENSMUSG00000072720	5	113117896	113325382
Adrbk2	ENSMUSG00000042249	5	113339498	113444811
Crybb2	ENSMUSG00000042240	5	113487278	113499137
Crybb3	ENSMUSG00000029352	5	113504859	113510604
2900026A02Rik	ENSMUSG00000051339	5	113515343	113592371
U6	ENSMUSG00000065373	5	113473164	113473272
Tmem211	ENSMUSG00000066964	5	113655929	113668283
Sgsm1	ENSMUSG00000042216	5	113672240	113739806
Aym1	ENSMUSG00000053873	5	113786314	113786841
AC151577.1	ENSMUSG00000093343	5	113690296	113690368
Wscd2	ENSMUSG00000063430	5	113919467	114039679
Wscd2	ENSMUSG00000085571	5	113919772	113919960
Cmklr1	ENSMUSG00000042190	5	114062363	114100435
1700069L16Rik	ENSMUSG00000042184	5	114142431	114174781
Ficd	ENSMUSG00000053334	5	114185791	114190609
Sart3	ENSMUSG00000018974	5	114192455	114221658
Gm3511	ENSMUSG00000069196	5	114217108	114217421
Iscu	ENSMUSG00000025825	5	114222757	114228297
Tmem119	ENSMUSG00000054675	5	114243738	114250525
Selplg	ENSMUSG00000048163	5	114267807	114280510
Gm15736	ENSMUSG00000085713	5	114094972	114095691
Coro1c	ENSMUSG00000004530	5	114292445	114358767
Gm17122	ENSMUSG00000090458	5	114292610	114293125
U6	ENSMUSG00000065320	5	114378733	114378813
Ssh1	ENSMUSG00000042121	5	114387103	114443903
Dao	ENSMUSG00000042096	5	114453712	114475458
Svop	ENSMUSG00000042078	5	114476919	114541579
Usp30	ENSMUSG00000029592	5	114550342	114573515
Alkbh2	ENSMUSG00000044339	5	114573935	114578227
Ung	ENSMUSG00000029591	5	114580395	114589332
Acacb	ENSMUSG00000042010	5	114596544	114700770
Gm16108	ENSMUSG00000089734	5	114515470	114539475
Foxn4	ENSMUSG00000042002	5	114704173	114723816
Gm13784	ENSMUSG00000084243	5	114687185	114687934
Myo1h	ENSMUSG00000066952	5	114764950	114814585
Kctd10	ENSMUSG00000001098	5	114813576	114830524
Ube3b	ENSMUSG00000029577	5	114830637	114871177
Gm13789	ENSMUSG00000085590	5	114813424	114815366
Mmab	ENSMUSG00000029575	5	114881043	114894068
Mvk	ENSMUSG00000041939	5	114894278	114910600
BC057022	ENSMUSG00000041930	5	115018025	115063229
Trpv4	ENSMUSG00000014158	5	115072161	115108430
Gltp	ENSMUSG00000011884	5	115119412	115140993
Tchp	ENSMUSG00000002486	5	115157769	115172336
Git2	ENSMUSG00000041890	5	115177416	115225526
Ankrd13a	ENSMUSG00000041870	5	115224686	115256209
Gm13790	ENSMUSG00000086302	5	115001298	115004025
4930515G01Rik	ENSMUSG00000092183	5	115223746	115224992
1500011B03Rik	ENSMUSG00000072694	5	115258205	115263985
Gm20499	ENSMUSG00000092252	5	115259045	115273469
1500011B03Rik	ENSMUSG00000092279	5	115262802	115263954
2610524H06Rik	ENSMUSG00000092486	5	115271944	115273477
Gm13821	ENSMUSG00000078186	5	115292358	115292871
Gm13820	ENSMUSG00000078187	5	115266974	115267111
Gm13819	ENSMUSG00000082052	5	115278582	115279224
4930519G04Rik	ENSMUSG00000029564	5	115303673	115333668
Gm9936	ENSMUSG00000054123	5	115305767	115308691
Gm13823	ENSMUSG00000080707	5	115317690	115318034
Oasl2	ENSMUSG00000029561	5	115346943	115362243
Oasl1	ENSMUSG00000041827	5	115373249	115387924
Gm13822	ENSMUSG00000087477	5	115367327	115373286
2210016L21Rik	ENSMUSG00000029559	5	115392167	115399792
Hnf1a	ENSMUSG00000029556	5	115398370	115421076
Gm13824	ENSMUSG00000086054	5	115418793	115448055
Gm13825	ENSMUSG00000086140	5	115418832	115421409
Sppl3	ENSMUSG00000029550	5	115461146	115548799
Gm13827	ENSMUSG00000086167	5	115503430	115503855
Gm10401	ENSMUSG00000072693	5	115547698	115548304
Acads	ENSMUSG00000029545	5	115560308	115569355
Unc119b	ENSMUSG00000046562	5	115572559	115584984
Mlec	ENSMUSG00000048578	5	115592990	115608188
Cabp1	ENSMUSG00000029544	5	115618698	115644390
Pop5	ENSMUSG00000060152	5	115685845	115695360
Rnf10	ENSMUSG00000041740	5	115691421	115722907
Gm13826	ENSMUSG00000072692	5	115552931	115560277
Gm13828	ENSMUSG00000083182	5	115648352	115648714
Coq5	ENSMUSG00000041733	5	115729675	115746981
Gm13831	ENSMUSG00000083875	5	115713102	115713403
Dynll1	ENSMUSG00000009013	5	115747119	115751008
Srsf9	ENSMUSG00000029538	5	115777186	115783089
Gatc	ENSMUSG00000029536	5	115783251	115791187
Gm13829	ENSMUSG00000082610	5	115741772	115741909
Gm13830	ENSMUSG00000086368	5	115751129	115769217
Triap1	ENSMUSG00000029535	5	115791234	115793578
Cox6a1	ENSMUSG00000041697	5	115795651	115798990
Nos1	ENSMUSG00000029361	5	118231041	118408849
Fbxo21	ENSMUSG00000032898	5	118426779	118460200
Tesc	ENSMUSG00000029359	5	118477752	118511887
Fbxw8	ENSMUSG00000032867	5	118514990	118605467
Gm9754	ENSMUSG00000029360	5	118515369	118519719
Hrk	ENSMUSG00000046607	5	118619773	118639487
Rnft2	ENSMUSG00000032850	5	118640745	118695125
2410131K14Rik	ENSMUSG00000032840	5	118695236	118716102
Med13l	ENSMUSG00000018076	5	119010728	119215444
Tbx3	ENSMUSG00000018604	5	120120678	120134733
Tbx5	ENSMUSG00000018263	5	120284672	120335227
Gm15754	ENSMUSG00000082365	5	118952849	118953326
Gm2301	ENSMUSG00000087516	5	120061272	120121374
Gm16063	ENSMUSG00000085708	5	120075951	120084473
Gm16064	ENSMUSG00000085345	5	120096143	120109271
Gm16065	ENSMUSG00000086847	5	120135104	120141227
7SK	ENSMUSG00000089248	5	118661062	118661351
SNORA17	ENSMUSG00000077540	5	118716458	118716589
U6	ENSMUSG00000088293	5	118598797	118598903
U6	ENSMUSG00000088085	5	118426463	118426569
n-R5s175	ENSMUSG00000084548	5	119747254	119747370
AC132338.1	ENSMUSG00000093041	5	118868736	118868827
Rbm19	ENSMUSG00000029594	5	120566519	120648394
Gm10390	ENSMUSG00000072671	5	120571112	120589272
n-R5s176	ENSMUSG00000064617	5	120514344	120514452
AC111115.1	ENSMUSG00000080412	5	120737735	120737856
Lhx5	ENSMUSG00000029595	5	120881779	120891464
Sdsl	ENSMUSG00000029596	5	120908195	120922819
Sds	ENSMUSG00000029597	5	120926540	120933941
Plbd2	ENSMUSG00000029598	5	120933291	120953634
Slc24a6	ENSMUSG00000032754	5	120961177	120984033
Tpcn1	ENSMUSG00000032741	5	120984169	121038622
Gm15690	ENSMUSG00000086165	5	120929851	120930912
Iqcd	ENSMUSG00000029601	5	121039025	121057123
1110008J03Rik	ENSMUSG00000029600	5	121044314	121062598
Ddx54	ENSMUSG00000029599	5	121063128	121078599
Rasal1	ENSMUSG00000029602	5	121098821	121129606
Gm15749	ENSMUSG00000089830	5	121098049	121098758
Dtx1	ENSMUSG00000029603	5	121130211	121161936
Oas2	ENSMUSG00000032690	5	121180342	121199862
Oas3	ENSMUSG00000032661	5	121203107	121227670
Oas1e	ENSMUSG00000066867	5	121236321	121245539
Oas1c	ENSMUSG00000001166	5	121250102	121262523
Oas1b	ENSMUSG00000029605	5	121262644	121274186
Oas1f	ENSMUSG00000053765	5	121297376	121307995
Oas1h	ENSMUSG00000001168	5	121311430	121323521
Oas1g	ENSMUSG00000066861	5	121326151	121337622
Oas1a	ENSMUSG00000052776	5	121346265	121357536
Oas1d	ENSMUSG00000032623	5	121364354	121371661
AC015535.1	ENSMUSG00000092939	5	121302180	121302305
Rph3a	ENSMUSG00000029608	5	121390511	121459527
Tmem132c	ENSMUSG00000034324	5	127722178	128046163
Slc15a4	ENSMUSG00000029416	5	128076034	128113267
Glt1d1	ENSMUSG00000049971	5	128112632	128189124
Tmem132d	ENSMUSG00000034310	5	128263861	128938937
Fzd10	ENSMUSG00000081683	5	129106719	129109968
Piwil1	ENSMUSG00000029423	5	129242121	129261349
Rimbp2	ENSMUSG00000029420	5	129266276	129459237
Stx2	ENSMUSG00000029428	5	129490432	129514449
Ran	ENSMUSG00000029430	5	129525944	129530198
Gpr133	ENSMUSG00000044017	5	129602625	129710474
1700085B03Rik	ENSMUSG00000087104	5	127737228	127762004
Gm17132	ENSMUSG00000061331	5	128357703	128358860
Gm17131	ENSMUSG00000085328	5	128358901	128362746
5930412G12Rik	ENSMUSG00000072591	5	129084981	129106568
Fzd10	ENSMUSG00000089856	5	129106806	129109236
Rps16-ps2	ENSMUSG00000060419	5	129633952	129634446
AC166933.1	ENSMUSG00000077816	5	128941118	128941211
Fam3c	ENSMUSG00000029672	6	22256520	22306243
Ptprz1	ENSMUSG00000068748	6	22825502	23002916
Aass	ENSMUSG00000029695	6	23022173	23082986
Fezf1	ENSMUSG00000029697	6	23195047	23198264
Cadps2	ENSMUSG00000017978	6	23212773	23789421
Rnf133	ENSMUSG00000051956	6	23598869	23600305
Rnf148	ENSMUSG00000078179	6	23603898	23605136
Tas2r118	ENSMUSG00000043865	6	23919161	23920060
Slc13a1	ENSMUSG00000029700	6	24038283	24118092
Gm5989	ENSMUSG00000071564	6	23107986	23110061
Gm5301	ENSMUSG00000071563	6	23115338	23117413
RP23-313A2.3	ENSMUSG00000093580	6	24088341	24090363
5S_rRNA	ENSMUSG00000088885	6	23589824	23589956
AC163663.1	ENSMUSG00000077877	6	22718106	22718202
AC134445.1	ENSMUSG00000077134	6	22739818	22739927
AC132439.1	ENSMUSG00000093255	6	24093368	24093468
Grm8	ENSMUSG00000024211	6	27225121	28085178
6530409C15Rik	ENSMUSG00000043340	6	28165555	28210862
Zfp800	ENSMUSG00000039841	6	28189931	28348005
Gcc1	ENSMUSG00000029708	6	28366091	28378390
Arf5	ENSMUSG00000020440	6	28373560	28376602
Fscn3	ENSMUSG00000029707	6	28377789	28388622
Pax4	ENSMUSG00000029706	6	28392334	28399353
Snd1	ENSMUSG00000001424	6	28425139	28885162
Lrrc4	ENSMUSG00000049939	6	28611831	28781747
Lep	ENSMUSG00000059201	6	29010220	29023877
Rbm28	ENSMUSG00000029701	6	29073573	29115006
Prrt4	ENSMUSG00000079654	6	29119232	29129584
Impdh1	ENSMUSG00000003500	6	29150434	29166364
Hilpda	ENSMUSG00000043421	6	29222488	29225446
Fam71f2	ENSMUSG00000079652	6	29229593	29240680
Fam71f1	ENSMUSG00000039742	6	29269140	29286021
Calu	ENSMUSG00000029767	6	29298069	29327110
Opn1sw	ENSMUSG00000058831	6	29326671	29338468
Ccdc136	ENSMUSG00000029769	6	29346309	29376955
Flnc	ENSMUSG00000068699	6	29383153	29411888
Atp6v1f	ENSMUSG00000004285	6	29417718	29420512
Gm9047	ENSMUSG00000090685	6	29421437	29423465
Kcp	ENSMUSG00000059022	6	29423162	29457952
Irf5	ENSMUSG00000029771	6	29476625	29491869
Tnpo3	ENSMUSG00000012535	6	29490827	29559887
Gm5303	ENSMUSG00000083107	6	28311914	28313165
Gm3294	ENSMUSG00000092090	6	28931634	28972165
Gm17172	ENSMUSG00000090692	6	29272804	29273206
Gm17515	ENSMUSG00000072491	6	29457725	29459698
Tspan33	ENSMUSG00000001763	6	29644222	29668559
Mir592	ENSMUSG00000076067	6	27886655	27886750
Mir129-1	ENSMUSG00000065469	6	28972619	28972691
SNORA17	ENSMUSG00000089289	6	29184434	29184564
U1	ENSMUSG00000064436	6	29063441	29063606
AC044807.1	ENSMUSG00000092956	6	29346617	29346705
U6	ENSMUSG00000088643	6	29437717	29437822
AC153909.1	ENSMUSG00000093288	6	29100554	29100679
A930035D04Rik	ENSMUSG00000052241	6	47403775	47404319
Rpl35a-ps7	ENSMUSG00000057764	6	47765299	47765631
Pdia4	ENSMUSG00000025823	6	47746141	47763511
Zfp786	ENSMUSG00000051499	6	47769265	47780866
Zfp398	ENSMUSG00000062519	6	47785660	47818256
Zfp282	ENSMUSG00000025821	6	47827203	47858484
Gm17629	ENSMUSG00000090614	6	47496665	47501703
Cntnap2	ENSMUSG00000039419	6	45010060	47251368
Rbpsuh-rs3	ENSMUSG00000079575	6	46479350	46480921
Cul1	ENSMUSG00000029686	6	47403397	47476138
Ezh2	ENSMUSG00000029687	6	47480273	47545340
Mir704	ENSMUSG00000076060	6	47753575	47753651
7SK	ENSMUSG00000089061	6	45987775	45988078
AC166252.1	ENSMUSG00000092729	6	47723328	47723428
AC166252.2	ENSMUSG00000093295	6	47724822	47724922
SNORA17	ENSMUSG00000089538	6	46431708	46431839
Y_RNA	ENSMUSG00000064945	6	47731623	47731724
Y_RNA	ENSMUSG00000065701	6	47738068	47738179
Y_RNA	ENSMUSG00000087897	6	47587142	47587218
Xpc	ENSMUSG00000030094	6	91439299	91465878
Fbln2	ENSMUSG00000064080	6	91162449	91222534
Ccdc37	ENSMUSG00000048794	6	90353730	90378791
Vmn1r53	ENSMUSG00000057697	6	90173311	90174432
4930471M09Rik	ENSMUSG00000085727	6	91380454	91390848
4930590J08Rik	ENSMUSG00000034063	6	91864753	91900634
Vmn1r-ps29	ENSMUSG00000092303	6	89947606	89954583
Vmn1r-ps31	ENSMUSG00000092450	6	90006403	90006640
Gm20534	ENSMUSG00000092588	6	90006620	90006791
Vmn1r-ps32	ENSMUSG00000061843	6	90103041	90103996
Gm20426	ENSMUSG00000092247	6	90181722	90182782
Vmn1r54	ENSMUSG00000047203	6	90219100	90220047
BC048671	ENSMUSG00000049694	6	90251213	90255443
Chst13	ENSMUSG00000056643	6	90258345	90275179
Uroc1	ENSMUSG00000034456	6	90283283	90314545
Zxdc	ENSMUSG00000034430	6	90319486	90353484
Slc41a3	ENSMUSG00000030089	6	90554719	90596406
Iqsec1	ENSMUSG00000034312	6	90609592	90760117
Rpl21-ps12	ENSMUSG00000057370	6	90794972	90795454
Nup210	ENSMUSG00000030091	6	90963062	91066823
C130022K22Rik	ENSMUSG00000034083	6	91828047	91849842
Gm4287	ENSMUSG00000092552	6	90185683	90186267
Vmn1r-ps34	ENSMUSG00000068228	6	90192266	90193237
Gm15756	ENSMUSG00000089781	6	90546679	90549942
Ppp1r2-ps2	ENSMUSG00000072894	6	90855693	90856501
Gm14573	ENSMUSG00000085624	6	91108707	91109250
Lsm3	ENSMUSG00000034192	6	91465951	91469829
Vmn1r46	ENSMUSG00000061653	6	89926165	89927094
Vmn1r47	ENSMUSG00000060724	6	89971882	89972814
Vmn1r48	ENSMUSG00000057592	6	89985927	89986835
Vmn1r49	ENSMUSG00000060151	6	90022080	90023012
Vmn1r50	ENSMUSG00000058595	6	90057269	90058201
Vmn1r51	ENSMUSG00000062818	6	90072637	90080984
Vmn1r52	ENSMUSG00000060816	6	90128710	90129639
V1ra8	ENSMUSG00000062546	6	90152787	90153676
Wnt7a	ENSMUSG00000030093	6	91313975	91361357
Chchd4	ENSMUSG00000034203	6	91414270	91423417
Tmem43	ENSMUSG00000030095	6	91423697	91438453
Klf15	ENSMUSG00000030087	6	90412570	90425232
Aldh1l1	ENSMUSG00000030088	6	90436421	90550197
Lsm3	ENSMUSG00000090846	6	91466029	91472614
Slc6a6	ENSMUSG00000030096	6	91634061	91709057
Grip2	ENSMUSG00000030098	6	91711503	91777244
Hdac11	ENSMUSG00000034245	6	91106659	91124686
AC121954.1	ENSMUSG00000093052	6	90631364	90631512
AC162914.1	ENSMUSG00000093712	6	91782499	91782569
SNORA17	ENSMUSG00000088379	6	90807531	90807626
9530026P05Rik	ENSMUSG00000087573	6	92890363	93222883
Fgd5	ENSMUSG00000034037	6	91928872	92025998
4930466I24Rik	ENSMUSG00000087317	6	91962388	91966111
Nr2c2	ENSMUSG00000005893	6	92041384	92123051
Mrps25	ENSMUSG00000014551	6	92119519	92134027
Zfyve20	ENSMUSG00000014550	6	92136706	92164919
Trh	ENSMUSG00000005892	6	92192055	92194644
Prickle2	ENSMUSG00000030020	6	92320886	92656139
Adamts9	ENSMUSG00000030022	6	92722693	92893486
A730049H05Rik	ENSMUSG00000048636	6	92766472	92797168
Gm15737	ENSMUSG00000079462	6	92819351	92834405
SNORA17	ENSMUSG00000077180	6	93285452	93285582
SNORA17	ENSMUSG00000088630	6	93459567	93459696
Magi1	ENSMUSG00000045095	6	93625449	94233316
U6	ENSMUSG00000088627	6	93743766	93743871
SNORA44	ENSMUSG00000089069	6	93840609	93840744
Atg7	ENSMUSG00000030314	6	114593149	114810431
Vgll4	ENSMUSG00000030315	6	114810646	114920012
1500001M20Rik	ENSMUSG00000030316	6	114954399	114987894
Syn2	ENSMUSG00000009394	6	115084920	115232644
Gm17482	ENSMUSG00000092004	6	115177361	115209312
Timp4	ENSMUSG00000030317	6	115195634	115201867
Pparg	ENSMUSG00000000440	6	115311239	115440419
Tsen2	ENSMUSG00000042389	6	115494682	115528368
2510049J12Rik	ENSMUSG00000068011	6	115533562	115542594
Mkrn2	ENSMUSG00000000439	6	115551949	115568688
Raf1	ENSMUSG00000000441	6	115568085	115626653
Tmem40	ENSMUSG00000059900	6	115679149	115712484
Cand2	ENSMUSG00000030319	6	115724556	115754911
Rpl32	ENSMUSG00000057841	6	115755523	115758765
Mbd4	ENSMUSG00000030322	6	115790715	115803389
Ift122	ENSMUSG00000030323	6	115803488	115876717
Rho	ENSMUSG00000030324	6	115881945	115888847
H1foo	ENSMUSG00000042279	6	115894956	115900254
Plxnd1	ENSMUSG00000030123	6	115904829	115945023
Tmcc1	ENSMUSG00000030126	6	115968636	116143504
D6Wsu116e	ENSMUSG00000024104	6	116158051	116212686
Anubl1	ENSMUSG00000042213	6	116214240	116280316
March8	ENSMUSG00000025702	6	116288042	116359558
Alox5	ENSMUSG00000025701	6	116360095	116411196
Olfr211	ENSMUSG00000053391	6	116443629	116444558
Olfr212	ENSMUSG00000053251	6	116456534	116467983
Olfr213	ENSMUSG00000081649	6	116490473	116491456
Olfr214	ENSMUSG00000051046	6	116506423	116507430
Olfr215	ENSMUSG00000050654	6	116531956	116533049
Zfp422	ENSMUSG00000059878	6	116574034	116579017
Rassf4	ENSMUSG00000042129	6	116583026	116623854
8430408G22Rik	ENSMUSG00000048489	6	116600702	116602865
Tmem72	ENSMUSG00000048108	6	116642648	116666931
Gm17733	ENSMUSG00000091748	6	115077620	115084790
Gm14335	ENSMUSG00000081805	6	115588268	115589077
D830050J10Rik	ENSMUSG00000055396	6	115626161	115626657
BC060267	ENSMUSG00000030321	6	115760747	115788430
Gm20404	ENSMUSG00000092625	6	116057669	116077511
Gm8203	ENSMUSG00000060214	6	116123652	116124512
Gm8213	ENSMUSG00000082474	6	116145436	116145876
Gm5580	ENSMUSG00000060393	6	116501160	116502622
AC142099.1	ENSMUSG00000093023	6	115856098	115856361
U3	ENSMUSG00000089295	6	114953065	114953150
AC147047.1	ENSMUSG00000089134	6	115049572	115049666
Snora7a	ENSMUSG00000064563	6	115757993	115758132
SNORA17	ENSMUSG00000088358	6	115673713	115673850
U7	ENSMUSG00000087849	6	116561593	116561654
SNORA17	ENSMUSG00000077758	6	116321957	116322086
SNORA17	ENSMUSG00000088374	6	116715547	116715670
Cxcl12	ENSMUSG00000061353	6	117118553	117131385
Rpl28-ps4	ENSMUSG00000090549	6	117163674	117164066
Gm9946	ENSMUSG00000054488	6	117509715	117522347
Gm7292	ENSMUSG00000072829	6	117666491	117667485
Hace1	ENSMUSG00000038822	10	45297635	45432151
U6	ENSMUSG00000065317	10	46097415	46097521
U1	ENSMUSG00000065718	10	46558152	46558313
SNORA17	ENSMUSG00000077361	10	46378314	46378444
Ccdc6	ENSMUSG00000048701	10	69559869	69655948
2310015B20Rik	ENSMUSG00000019933	10	69667432	69682458
Slc16a9	ENSMUSG00000037762	10	69707848	69748716
Fam13c	ENSMUSG00000043259	10	69903416	70021479
Phyhipl	ENSMUSG00000037747	10	70020430	70118713
Gm7097	ENSMUSG00000089835	10	69746983	69747701
Gm9877	ENSMUSG00000052426	10	69748297	69750924
Rhobtb1	ENSMUSG00000019944	10	68614182	68754539
A930033H14Rik	ENSMUSG00000090622	10	68672510	68675846
Cdk1	ENSMUSG00000019942	10	68799383	68815686
Ank3	ENSMUSG00000069601	10	68996970	69490184
7SK	ENSMUSG00000087774	10	69963940	69964251
SNORA24	ENSMUSG00000077315	10	68595630	68595746
4930533K18Rik	ENSMUSG00000047692	10	70331417	70397072
Bicc1	ENSMUSG00000014329	10	70385580	70622448
U6	ENSMUSG00000065292	10	70344852	70344958
Gm15647	ENSMUSG00000090212	10	70545624	70546399
Tfam	ENSMUSG00000003923	10	70688212	70701028
Ube2d1	ENSMUSG00000019927	10	70717728	70748010
Cisd1	ENSMUSG00000037710	10	70793228	70807702
Ipmk	ENSMUSG00000060733	10	70810511	70896075
RP23-60H16.1	ENSMUSG00000093732	10	70773493	70776725
Gm4798	ENSMUSG00000044690	10	71167326	71168033
1700049L16Rik	ENSMUSG00000043859	10	71442638	71443442
SNORA17	ENSMUSG00000077142	10	71360784	71360914
Gm9923	ENSMUSG00000053830	10	71772069	71773907
Usp44	ENSMUSG00000020020	10	93294300	93311269
Metap2	ENSMUSG00000036112	10	93321234	93353947
Vezt	ENSMUSG00000036099	10	93401910	93498562
Fgd6	ENSMUSG00000020021	10	93498746	93608084
Nr2c1	ENSMUSG00000005897	10	93610768	93659956
Ndufa12	ENSMUSG00000020022	10	93661700	93684188
Gm4792	ENSMUSG00000053420	10	93756410	93761448
Tmcc3	ENSMUSG00000020023	10	93774694	94053701
Ccdc41	ENSMUSG00000020024	10	94151535	94253081
Plxnc1	ENSMUSG00000074785	10	94253617	94407212
Cradd	ENSMUSG00000045867	10	94637380	94786767
Socs2	ENSMUSG00000020027	10	94847996	94879814
Mrpl42	ENSMUSG00000062981	10	94943440	94964561
Ube2n	ENSMUSG00000074781	10	94977779	95008292
Nudt4	ENSMUSG00000020029	10	95009641	95026801
Gm6843	ENSMUSG00000074780	10	95135625	95136085
Gm3571	ENSMUSG00000090610	10	93241372	93242514
Gm16155	ENSMUSG00000085409	10	93871636	93873477
Gm16154	ENSMUSG00000086269	10	94030573	94074829
4932415G12Rik	ENSMUSG00000086635	10	94136238	94151358
5730420D15Rik	ENSMUSG00000085613	10	94880009	94891274
5S_rRNA	ENSMUSG00000088608	10	94284274	94284400
U6	ENSMUSG00000065296	10	93647237	93647318
Mir3058	ENSMUSG00000092867	10	95021865	95021955
Mir331	ENSMUSG00000065607	10	93426513	93426608
7SK	ENSMUSG00000089618	10	95066426	95066750
SNORA73	ENSMUSG00000087798	10	93378914	93379081
7SK	ENSMUSG00000089146	10	94411224	94411527
U6	ENSMUSG00000064827	10	93270043	93270149
AC159379.1	ENSMUSG00000093043	10	94393102	94393413
Atp2b1	ENSMUSG00000019943	10	98377786	98488777
Poc1b	ENSMUSG00000019952	10	98569670	98660708
Galnt4	ENSMUSG00000090035	10	98570793	98575881
Phxr2	ENSMUSG00000055108	10	98588151	98588955
Dusp6	ENSMUSG00000019960	10	98725865	98730122
B530045E10Rik	ENSMUSG00000044633	10	98883156	98885681
Gad1-ps	ENSMUSG00000090665	10	98906364	98909641
Csl	ENSMUSG00000046934	10	99220339	99222292
Kitl	ENSMUSG00000019966	10	99478264	99563047
Gm16239	ENSMUSG00000089994	10	98641818	98647244
AC167229.1	ENSMUSG00000077034	10	99606888	99606997
AC167229.2	ENSMUSG00000077043	10	99602135	99602244
Gm8701	ENSMUSG00000091739	10	99788062	99794069
Gm4301	ENSMUSG00000091918	10	99798310	99799225
Gm4302	ENSMUSG00000091101	10	99803490	99804374
Gm4303	ENSMUSG00000090421	10	99808624	99809493
Gm4305	ENSMUSG00000091715	10	99813745	99814614
Gm8711	ENSMUSG00000091552	10	99818871	99819750
Gm4307	ENSMUSG00000091170	10	99823990	99824859
Gm4308	ENSMUSG00000091145	10	99829133	99830048
Gm8723	ENSMUSG00000091738	10	99839096	99839969
Gm4312	ENSMUSG00000091915	10	99844279	99845194
Gm4781	ENSMUSG00000090987	10	99858921	99859706
Tmtc3	ENSMUSG00000036676	10	99906536	99949984
Cep290	ENSMUSG00000019971	10	99950923	100036289
Gm15662	ENSMUSG00000089855	10	104675190	104675348
Gm15666	ENSMUSG00000084399	10	104943272	104944195
Gm15664	ENSMUSG00000089904	10	104957516	104957699
Gm15663	ENSMUSG00000085282	10	105011009	105020930
Tmtc2	ENSMUSG00000036019	10	104624719	105011507
BC067068	ENSMUSG00000036009	10	105200241	105278436
Ccdc59	ENSMUSG00000019897	10	105278123	105284889
Rps15a-ps1	ENSMUSG00000056877	10	105629434	105629826
U6	ENSMUSG00000089019	10	104302260	104302364
U1	ENSMUSG00000089182	10	103908107	103908263
SNORA17	ENSMUSG00000077407	10	104577263	104577391
AC132471.1	ENSMUSG00000080525	10	105287151	105287228
U1	ENSMUSG00000064432	10	104477329	104477494
SNORA61	ENSMUSG00000088415	10	105366668	105366799
n-R5s80	ENSMUSG00000084545	10	105241143	105241253
SNORA17	ENSMUSG00000088084	10	105493014	105493135
Slc16a7	ENSMUSG00000020102	10	124663520	124766019
Lrig3	ENSMUSG00000020105	10	125403275	125452415
AC153489.1	ENSMUSG00000093161	10	125473883	125473955
Stac3	ENSMUSG00000040287	10	126938742	126945879
Ndufa4l2	ENSMUSG00000040280	10	126951995	126954208
Shmt2	ENSMUSG00000025403	10	126954195	126959491
Nxph4	ENSMUSG00000040258	10	126962529	126971615
Lrp1	ENSMUSG00000040249	10	126975217	127058204
Stat6	ENSMUSG00000002147	10	127080042	127098013
Nab2	ENSMUSG00000025402	10	127097974	127105624
Tmem194	ENSMUSG00000040195	10	127103957	127138105
Myo1a	ENSMUSG00000025401	10	127142226	127157943
Tac2	ENSMUSG00000025400	10	127162448	127168823
Zbtb39	ENSMUSG00000044617	10	127176594	127184391
Gpr182	ENSMUSG00000058396	10	127184332	127188788
Rdh1	ENSMUSG00000089789	10	127196777	127205353
Rdh9	ENSMUSG00000056148	10	127196843	127229753
Rdh16	ENSMUSG00000069456	10	127238208	127283621
Rdh19	ENSMUSG00000054052	10	127286984	127298232
BC089597	ENSMUSG00000074639	10	127303530	127314373
Rdh7	ENSMUSG00000040134	10	127321084	127326095
Sdr9c7	ENSMUSG00000040127	10	127335574	127348817
Hsd17b6	ENSMUSG00000025396	10	127427997	127437734
Gm10120	ENSMUSG00000062678	10	127448832	127449188
Prim1	ENSMUSG00000025395	10	127452228	127467093
Naca	ENSMUSG00000061315	10	127472402	127485693
Ptges3	ENSMUSG00000071072	10	127496010	127514328
Baz2a	ENSMUSG00000040054	10	127496046	127566359
Atp5b	ENSMUSG00000025393	10	127520329	127527447
Rbms2	ENSMUSG00000040043	10	127566526	127617353
Gls2	ENSMUSG00000044005	10	127631513	127647060
Spryd4	ENSMUSG00000051346	10	127646964	127648850
Mip	ENSMUSG00000025389	10	127662894	127668868
Timeless	ENSMUSG00000039994	10	127669119	127689997
Apon	ENSMUSG00000051716	10	127691187	127692957
Apof	ENSMUSG00000047631	10	127705053	127707207
Stat2	ENSMUSG00000040033	10	127707629	127729905
Il23a	ENSMUSG00000025383	10	127733196	127735140
Pan2	ENSMUSG00000005682	10	127740391	127758403
Cnpy2	ENSMUSG00000025381	10	127759515	127764243
Cs	ENSMUSG00000005683	10	127774888	127799535
Coq10a	ENSMUSG00000039914	10	127800153	127807088
Ankrd52	ENSMUSG00000014498	10	127814171	127845760
Slc39a5	ENSMUSG00000039878	10	127832990	127838280
Obfc2b	ENSMUSG00000025374	10	127838451	127848548
Rnf41	ENSMUSG00000025373	10	127848672	127878494
Smarcc2	ENSMUSG00000025369	10	127896292	127927229
Myl6	ENSMUSG00000090841	10	127927916	127930931
Myl6b	ENSMUSG00000039824	10	127931213	127935741
Esyt1	ENSMUSG00000025366	10	127947304	127962926
Zc3h10	ENSMUSG00000039810	10	127979019	127984830
Rpl41	ENSMUSG00000093674	10	127985170	127986361
Pa2g4	ENSMUSG00000025364	10	127994822	128002990
Erbb3	ENSMUSG00000018166	10	128004579	128026708
Gm9182	ENSMUSG00000091240	10	128052412	128053677
Rps26	ENSMUSG00000025362	10	128061586	128063562
Ikzf4	ENSMUSG00000002578	10	128067899	128083047
Suox	ENSMUSG00000049858	10	128106943	128110974
Rab5b	ENSMUSG00000000711	10	128114249	128133324
Cdk2	ENSMUSG00000025358	10	128134995	128142107
Pmel	ENSMUSG00000025359	10	128143314	128157294
Dgka	ENSMUSG00000025357	10	128157197	128181112
Wibg	ENSMUSG00000064030	10	128184935	128203617
Mmp19	ENSMUSG00000025355	10	128228009	128237880
Tmem198b	ENSMUSG00000047090	10	128237092	128241426
Dnajc14	ENSMUSG00000025354	10	128242690	128256502
Ormdl2	ENSMUSG00000025353	10	128254513	128258687
Sarnp	ENSMUSG00000078427	10	128258827	128314694
Gm20492	ENSMUSG00000092593	10	126725570	126726737
Gm4189	ENSMUSG00000092384	10	126726752	126727844
Gm16217	ENSMUSG00000086499	10	127033604	127034926
Gm16229	ENSMUSG00000085731	10	127100895	127102540
Gm16230	ENSMUSG00000087163	10	127108660	127113780
Rdh18-ps	ENSMUSG00000054031	10	127261340	127280994
Gm15905	ENSMUSG00000085993	10	127358123	127358417
Gm15900	ENSMUSG00000090036	10	127385275	127385616
Gm17201	ENSMUSG00000090761	10	127828898	127832619
Rpsa-ps2	ENSMUSG00000045055	10	128213798	128214307
Xrcc6bp1	ENSMUSG00000025436	10	126305486	126338427
Ctdsp2	ENSMUSG00000078429	10	126415773	126437031
Gli1	ENSMUSG00000025407	10	126766945	126778645
Arhgef25	ENSMUSG00000019467	10	126619577	126627110
March9	ENSMUSG00000040502	10	126492067	126497240
Dctn2	ENSMUSG00000025410	10	126703442	126718862
Mbd6	ENSMUSG00000025409	10	126719012	126726074
Ddit3	ENSMUSG00000025408	10	126727830	126733344
F420014N23Rik	ENSMUSG00000086597	10	126632305	126639699
Gm17292	ENSMUSG00000091500	10	127667646	127669846
A430046D13Rik	ENSMUSG00000085446	10	127936420	127941298
Gm17336	ENSMUSG00000091431	10	128082940	128086867
Fam119b	ENSMUSG00000080115	10	126468238	126478569
Mettl1	ENSMUSG00000006732	10	126478470	126483421
Avil	ENSMUSG00000025432	10	126437765	126458050
Inhbe	ENSMUSG00000047492	10	126786458	126788828
Inhbc	ENSMUSG00000025405	10	126793384	126807600
Cdk4	ENSMUSG00000006728	10	126500590	126504976
Os9	ENSMUSG00000040462	10	126531315	126558216
Pip4k2c	ENSMUSG00000025417	10	126634123	126648678
Kif5a	ENSMUSG00000074657	10	126662755	126700136
Arhgap9	ENSMUSG00000040345	10	126759172	126766999
Dtx3	ENSMUSG00000040415	10	126627434	126632784
B4galnt1	ENSMUSG00000006731	10	126602247	126609385
Slc26a10	ENSMUSG00000040441	10	126608449	126617701
R3hdm2	ENSMUSG00000025404	10	126817383	126936440
Tspan31	ENSMUSG00000006736	10	126504373	126507317
Agap2	ENSMUSG00000025422	10	126515963	126530225
Cyp27b1	ENSMUSG00000006724	10	126485306	126490062
Mars	ENSMUSG00000040354	10	126733277	126748842
Tsfm	ENSMUSG00000040521	10	126448628	126467896
U8	ENSMUSG00000089313	10	127786298	127786431
Mir26a-2	ENSMUSG00000065430	10	126432586	126432669
SCARNA11	ENSMUSG00000088151	10	127872970	127873100
Mir546	ENSMUSG00000072837	10	126435496	126435616
U6atac	ENSMUSG00000088672	10	126575585	126575673
AC131120.1	ENSMUSG00000093245	10	127522345	127522416
AC090489.1	ENSMUSG00000088393	10	127814887	127814955
SNORD59	ENSMUSG00000064778	10	127521199	127521272
SNORA70	ENSMUSG00000088687	10	127390101	127390231
U6	ENSMUSG00000064948	10	127736475	127736580
U6	ENSMUSG00000089369	10	126841340	126841448
Gdf11	ENSMUSG00000025352	10	128319351	128328774
Cd63	ENSMUSG00000025351	10	128345975	128349872
Rdh5	ENSMUSG00000025350	10	128350649	128359944
Bloc1s1	ENSMUSG00000090247	10	128354938	128361091
Itga7	ENSMUSG00000025348	10	128370869	128395333
Mettl7b	ENSMUSG00000025347	10	128395333	128398044
Olfr9	ENSMUSG00000069430	10	128426905	128427956
Olfr763	ENSMUSG00000063374	10	128448278	128449321
U6	ENSMUSG00000088768	10	128381961	128382060
Olfr764	ENSMUSG00000069429	10	128470925	128471854
Olfr765	ENSMUSG00000056853	10	128483188	128484117
Olfr767	ENSMUSG00000059762	10	128516028	128517113
Olfr768	ENSMUSG00000050198	10	128530090	128531028
Olfr769	ENSMUSG00000042801	10	128548484	128549567
Olfr770	ENSMUSG00000047868	10	128569887	128570822
Olfr771	ENSMUSG00000061367	10	128597085	128598038
Olfr772	ENSMUSG00000091414	10	128611107	128612110
Olfr773	ENSMUSG00000091717	10	128623507	128624510
Olfr774	ENSMUSG00000072403	10	128675207	128676145
Olfr775	ENSMUSG00000072402	10	128687592	128688530
Olfr776	ENSMUSG00000059402	10	128698019	128698957
Olfr777	ENSMUSG00000062914	10	128705442	128706377
Olfr779	ENSMUSG00000044537	10	128748565	128748954
Olfr780	ENSMUSG00000049573	10	128758625	128759649
Olfr781	ENSMUSG00000059787	10	128769939	128770874
Olfr782	ENSMUSG00000057151	10	128787621	128788565
Olfr784	ENSMUSG00000062239	10	128824691	128825650
Olfr786	ENSMUSG00000064245	10	128873870	128874808
Olfr787	ENSMUSG00000057617	10	128899734	128900672
Olfr788	ENSMUSG00000049217	10	128909750	128910685
SNORA17	ENSMUSG00000077280	10	128739147	128739280
7SK	ENSMUSG00000084732	10	128609629	128609933
Olfr790	ENSMUSG00000044025	10	128937869	128938938
Olfr791	ENSMUSG00000047626	10	128963285	128964223
Olfr792	ENSMUSG00000057300	10	128977595	128978530
Olfr794	ENSMUSG00000044293	10	129007713	129008675
Olfr796	ENSMUSG00000052012	10	129044603	129045535
Olfr798	ENSMUSG00000058304	10	129062180	129063115
Olfr799	ENSMUSG00000057002	10	129084186	129085121
Olfr800	ENSMUSG00000063452	10	129096860	129097799
Olfr801	ENSMUSG00000058513	10	129106617	129107573
Olfr802	ENSMUSG00000059414	10	129118855	129119793
Olfr803	ENSMUSG00000046041	10	129128169	129129095
Olfr804	ENSMUSG00000057403	10	129141936	129142880
Olfr805	ENSMUSG00000060089	10	129159639	129160598
Olfr806	ENSMUSG00000071065	10	129174817	129175971
Olfr807	ENSMUSG00000050478	10	129191545	129192541
Olfr808	ENSMUSG00000049894	10	129204554	129205492
Olfr809	ENSMUSG00000050251	10	129212883	129213982
Olfr810	ENSMUSG00000069421	10	129227665	129228670
Olfr811	ENSMUSG00000063173	10	129238620	129239579
Olfr812	ENSMUSG00000049052	10	129279076	129280118
Olfr813	ENSMUSG00000052818	10	129293576	129294508
Olfr814	ENSMUSG00000059134	10	129310879	129311811
Olfr815	ENSMUSG00000061961	10	129338832	129339782
Olfr816	ENSMUSG00000063715	10	129348394	129349332
Olfr818	ENSMUSG00000058071	10	129382160	129383116
SNORA17	ENSMUSG00000088147	10	129133034	129133157
AC132266.1	ENSMUSG00000076964	10	129019842	129019951
Olfr819	ENSMUSG00000091646	10	129402792	129403754
Olfr247	ENSMUSG00000090748	10	129411661	129412623
Gm10310	ENSMUSG00000091597	10	129420536	129421498
Olfr820	ENSMUSG00000048745	10	129454357	129455417
Olfr821	ENSMUSG00000044897	10	129470684	129471616
Olfr822	ENSMUSG00000058251	10	129511465	129512406
Olfr823	ENSMUSG00000060564	10	129548897	129549844
Olfr824	ENSMUSG00000057264	10	129563164	129564111
Olfr825	ENSMUSG00000058084	10	129599233	129600380
Olfr826	ENSMUSG00000059862	10	129616993	129617934
Olfr827	ENSMUSG00000045559	10	129647148	129648205
Neurod4	ENSMUSG00000048015	10	129705209	129717296
Tespa1	ENSMUSG00000034833	10	129759908	129801091
Vmn2r84	ENSMUSG00000070601	10	129822372	129831297
Gm9770	ENSMUSG00000040540	10	129849555	129850368
Vmn2r85	ENSMUSG00000092048	10	129854828	129866668
Vmn2r86	ENSMUSG00000092162	10	129882763	129892950
Vmn2r87	ENSMUSG00000091511	10	129908388	129934435
Gm17332	ENSMUSG00000091195	11	31082376	31082462
Stc2	ENSMUSG00000020303	11	31257307	31270074
Bod1	ENSMUSG00000044502	11	31565181	31571919
Cpeb4	ENSMUSG00000020300	11	31772211	31835634
4930524B15Rik	ENSMUSG00000020299	11	31865592	31879651
Nsg2	ENSMUSG00000020297	11	31900463	31959202
Il9r	ENSMUSG00000020279	11	32087541	32100279
Snrnp25	ENSMUSG00000040767	11	32105415	32108984
Rhbdf1	ENSMUSG00000020282	11	32109585	32122300
Nprl3	ENSMUSG00000020289	11	32125628	32167707
Mpg	ENSMUSG00000020287	11	32126505	32132700
Hba-x	ENSMUSG00000055609	11	32176400	32178116
Hba-a1	ENSMUSG00000069919	11	32183511	32184465
Hbq1b	ENSMUSG00000073063	11	32186965	32187784
Hba-a2	ENSMUSG00000069917	11	32196489	32197301
Hbq1a	ENSMUSG00000020295	11	32200069	32200873
Sh3pxd2b	ENSMUSG00000040711	11	32247820	32328173
Ubtd2	ENSMUSG00000044949	11	32355370	32416687
Efcab9	ENSMUSG00000044056	11	32422751	32432081
Stk10	ENSMUSG00000020272	11	32433305	32524587
Fbxw11	ENSMUSG00000020271	11	32542724	32646816
Gm10462	ENSMUSG00000073057	11	32625838	32626208
1700008A04Rik	ENSMUSG00000020270	11	32718529	32724605
Fgf18	ENSMUSG00000057967	11	33017430	33047400
Gm12106	ENSMUSG00000079890	11	31077818	31084374
D630024D03Rik	ENSMUSG00000085772	11	31690113	31724524
Gm12107	ENSMUSG00000086335	11	31732660	31738214
Gm12108	ENSMUSG00000086386	11	31995261	32001228
Gm12109	ENSMUSG00000081613	11	32085005	32085701
4930555O08Rik	ENSMUSG00000085676	11	32689762	32690725
Gm12110	ENSMUSG00000083303	11	32780362	32780940
Gm12111	ENSMUSG00000085402	11	32803137	32826160
Gm12112	ENSMUSG00000081254	11	32810373	32810603
Rpsa-ps4	ENSMUSG00000081076	11	32938751	32939781
Gm12114	ENSMUSG00000087318	11	32968551	32980521
Gm9075	ENSMUSG00000092168	12	3082667	3087041
Gm20448	ENSMUSG00000092286	12	3752543	3762146
Gm10485	ENSMUSG00000073242	12	3859293	3862244
Gm6682	ENSMUSG00000091269	12	4789021	4789317
Gm17681	ENSMUSG00000069181	12	3343816	3357153
1700012B15Rik	ENSMUSG00000079179	12	3236611	3249999
Rab10	ENSMUSG00000020671	12	3247430	3309969
Kif3c	ENSMUSG00000020668	12	3365132	3406494
1110002L01Rik	ENSMUSG00000071456	12	3405308	3426644
Asxl2	ENSMUSG00000037486	12	3426857	3506852
Dtnb	ENSMUSG00000071454	12	3572381	3781796
Dnmt3a	ENSMUSG00000020661	12	3806007	3914443
Pomc	ENSMUSG00000020660	12	3954951	3960618
Efr3b	ENSMUSG00000020658	12	3962554	4038915
Dnajc27	ENSMUSG00000020657	12	4082612	4110602
Adcy3	ENSMUSG00000020654	12	4133103	4213525
Cenpo	ENSMUSG00000020652	12	4196004	4234294
2410017P09Rik	ENSMUSG00000073240	12	4234027	4236693
Ncoa1	ENSMUSG00000020647	12	4247363	4484060
Gm3625	ENSMUSG00000091619	12	4599632	4599733
Itsn2	ENSMUSG00000020640	12	4599814	4720756
Gm17541	ENSMUSG00000091732	12	4696208	4696732
4930417G10Rik	ENSMUSG00000079177	12	4720476	4745225
A830093I24Rik	ENSMUSG00000050545	12	4753022	4776073
Pfn4	ENSMUSG00000020639	12	4776101	4785072
0610009D07Rik	ENSMUSG00000037361	12	4824414	4834464
Fkbp1b	ENSMUSG00000020635	12	4839981	4848401
BC068281	ENSMUSG00000051721	12	4850109	4863731
Mfsd2b	ENSMUSG00000037336	12	4869246	4881165
Ubxn2a	ENSMUSG00000020634	12	4885838	4914511
Atad2b	ENSMUSG00000052812	12	4924210	5050853
7SK	ENSMUSG00000084597	12	4394482	4394767
AC160138.1	ENSMUSG00000092711	12	3448282	3448352
U6	ENSMUSG00000087939	12	4756558	4756662
5S_rRNA	ENSMUSG00000088207	12	4347647	4347760
CR974568.1	ENSMUSG00000077830	12	3699178	3699240
U6	ENSMUSG00000075833	12	4765353	4765459
AC159324.1	ENSMUSG00000093310	12	3890652	3890731
U6	ENSMUSG00000087780	12	5006072	5006174
Klhl29	ENSMUSG00000020627	12	5084278	5382488
2810032G03Rik	ENSMUSG00000037735	12	5382676	5423436
5S_rRNA	ENSMUSG00000088209	12	5850518	5850632
AC165293.1	ENSMUSG00000093576	12	5585987	5586069
Gm17295	ENSMUSG00000090299	12	7120432	7121931
AC124134.1	ENSMUSG00000093053	12	7748359	7748428
Gm9144	ENSMUSG00000073233	12	7866633	7868011
Apob	ENSMUSG00000020609	12	7984454	8023641
Gm4755	ENSMUSG00000087567	12	8771707	8777987
1110057K04Rik	ENSMUSG00000037669	12	8214913	8292564
Gdf7	ENSMUSG00000037660	12	8304740	8308760
Hs1bp3	ENSMUSG00000020605	12	8320239	8350630
Rhob	ENSMUSG00000054364	12	8504569	8506791
Slc7a15	ENSMUSG00000020600	12	8535289	8605872
Pum2	ENSMUSG00000020594	12	8680940	8759387
Sdc1	ENSMUSG00000020592	12	8778129	8800521
AC122860.1	ENSMUSG00000093208	12	8305084	8305145
9930038B18Rik	ENSMUSG00000042976	12	8879993	8884265
Laptm4a	ENSMUSG00000020585	12	8928130	8945548
Matn3	ENSMUSG00000020583	12	8954735	8978834
Wdr35	ENSMUSG00000066643	12	8980698	9035653
Ttc32	ENSMUSG00000066637	12	9036803	9043200
Gm5432	ENSMUSG00000087421	12	15823809	15894961
Trib2	ENSMUSG00000020601	12	15798533	15823683
Lpin1	ENSMUSG00000020593	12	16542475	16596576
Ntsr2	ENSMUSG00000020591	12	16660276	16667042
Greb1	ENSMUSG00000036523	12	16677421	16807692
E2f6	ENSMUSG00000057469	12	16817771	16833549
Rock2	ENSMUSG00000020580	12	16901784	16995080
AC157352.1	ENSMUSG00000077958	12	16806933	16807022
AC102435.1	ENSMUSG00000080375	12	16197157	16197226
AC158354.1	ENSMUSG00000092717	12	15027341	15027450
Pqlc3	ENSMUSG00000045679	12	16995454	17007214
2410004P03Rik	ENSMUSG00000071398	12	17011764	17018360
Kcnf1	ENSMUSG00000051726	12	17178908	17183694
Pdia6	ENSMUSG00000020571	12	17273351	17291576
Atp6v1c2	ENSMUSG00000020566	12	17291527	17336165
Nol10	ENSMUSG00000061458	12	17355285	17437381
Odc1	ENSMUSG00000011179	12	17551679	17558308
Hpcal1	ENSMUSG00000071379	12	17697620	17798732
Gm9222	ENSMUSG00000091094	12	17889003	17889338
B430203G13Rik	ENSMUSG00000067356	12	17931100	17932474
SNORA42	ENSMUSG00000064427	12	17552952	17553087
SNORA32	ENSMUSG00000064620	12	16946800	16946921
7SK	ENSMUSG00000088939	12	17651706	17652011
Mir3066	ENSMUSG00000093037	12	17362198	17362280
CT030170.1	ENSMUSG00000077841	12	17956264	17956354
Gm10480	ENSMUSG00000073198	12	18223404	18224060
Gm4983	ENSMUSG00000091687	12	17999939	18000274
Gm9590	ENSMUSG00000091781	12	18394561	18394884
5730507C01Rik	ENSMUSG00000073197	12	18521544	18540997
Gm17563	ENSMUSG00000090914	12	24611550	24612904
Gm6969	ENSMUSG00000066553	12	25322866	25323897
Gm10330	ENSMUSG00000071362	12	24463777	24465130
Gm17330	ENSMUSG00000091196	12	24653375	24653710
9030624G23Rik	ENSMUSG00000073158	12	24729566	24781833
Gm9312	ENSMUSG00000092064	12	24936711	24937046
Gm16372	ENSMUSG00000057160	12	25178072	25178521
Taf1b	ENSMUSG00000059669	12	25183446	25243436
Grhl1	ENSMUSG00000020656	12	25257152	25302256
Klf11	ENSMUSG00000020653	12	25336236	25347639
Cys1	ENSMUSG00000062563	12	25350703	25366678
Rrm2	ENSMUSG00000020649	12	25393106	25399011
Mboat2	ENSMUSG00000020646	12	25516464	25645166
Kidins220	ENSMUSG00000036333	12	25659797	25746142
Id2	ENSMUSG00000020644	12	25778666	25780957
SNORA70	ENSMUSG00000089203	12	25463883	25464011
5S_rRNA	ENSMUSG00000089441	12	26372666	26372771
Rnf144a	ENSMUSG00000020642	12	26991662	27100121
Rsad2	ENSMUSG00000020641	12	27127618	27141317
Cmpk2	ENSMUSG00000020638	12	27154069	27164700
Yy1	ENSMUSG00000021264	12	110031183	110054842
Slc25a29	ENSMUSG00000021265	12	110064083	110074093
Slc25a47	ENSMUSG00000048856	12	110089339	110095024
Wars	ENSMUSG00000021266	12	110098240	110132384
Wdr25	ENSMUSG00000040877	12	110132482	110266662
Begain	ENSMUSG00000040867	12	110270397	110291589
Dlk1	ENSMUSG00000040856	12	110691033	110701546
Rtl1	ENSMUSG00000085925	12	110827404	110838540
Dio3	ENSMUSG00000075707	12	111517278	111519307
Ppp2r5c	ENSMUSG00000017843	12	111685518	111821271
Dync1h1	ENSMUSG00000018707	12	111839662	111905155
1700001K19Rik	ENSMUSG00000056508	12	111905899	111920829
Hsp90aa1	ENSMUSG00000021270	12	111928815	111940938
Meg3	ENSMUSG00000021268	12	110779211	110809936
Gm17111	ENSMUSG00000090327	12	111903102	111903618
Gm17639	ENSMUSG00000090521	12	110806838	110809933
Rian	ENSMUSG00000091793	12	110842155	110899919
Mirg	ENSMUSG00000091158	12	110973191	110987665
Dio3os	ENSMUSG00000090962	12	111513594	111516278
SNORD113	ENSMUSG00000084604	12	110926265	110926335
SNORD113	ENSMUSG00000084549	12	110887827	110887898
Mir337	ENSMUSG00000065526	12	110824000	110824096
Mir379	ENSMUSG00000065498	12	110947235	110947357
SNORD112	ENSMUSG00000089449	12	110844667	110844743
SNORD113	ENSMUSG00000088820	12	110927687	110927754
AF357341	ENSMUSG00000065022	12	110919729	110919803
Mir673	ENSMUSG00000076316	12	110810200	110810290
Mir487b	ENSMUSG00000076219	12	110965543	110965624
Mir3072	ENSMUSG00000093351	12	110986088	110986170
Mir412	ENSMUSG00000065570	12	110981499	110981578
Mir1193	ENSMUSG00000080411	12	110953881	110954001
Mir154	ENSMUSG00000065448	12	110976634	110976717
SNORD113	ENSMUSG00000064487	12	110919010	110919084
Mir496	ENSMUSG00000070136	12	110977329	110977407
Mir431	ENSMUSG00000070080	12	110828657	110828747
Mir539	ENSMUSG00000076063	12	110966339	110966412
Mir370	ENSMUSG00000065433	12	110856468	110856546
Mir667	ENSMUSG00000076396	12	110958216	110958307
AC121784.1	ENSMUSG00000093089	12	110981368	110981447
U6	ENSMUSG00000088217	12	110100774	110100879
SNORD113	ENSMUSG00000064726	12	110925008	110925079
Mir1197	ENSMUSG00000080687	12	110950527	110950646
Mir433	ENSMUSG00000070072	12	110829925	110830048
Mir136	ENSMUSG00000070129	12	110833527	110833608
Mir411	ENSMUSG00000065477	12	110948385	110948480
SNORD113	ENSMUSG00000084487	12	110923172	110923244
AF357355	ENSMUSG00000064621	12	110892837	110892908
AC121784.4	ENSMUSG00000093291	12	110948819	110948935
AF357425	ENSMUSG00000088294	12	110874222	110874294
SNORD113	ENSMUSG00000064679	12	110895335	110895406
SNORD113	ENSMUSG00000065013	12	110891243	110891314
SNORD113	ENSMUSG00000064452	12	110869284	110869358
Mir3070b	ENSMUSG00000093209	12	110826802	110826890
SNORD113	ENSMUSG00000084691	12	110884339	110884412
SNORD113	ENSMUSG00000065757	12	110912123	110912204
Mir382	ENSMUSG00000065428	12	110971979	110972058
SNORD113	ENSMUSG00000064720	12	110921204	110921278
AC121784.2	ENSMUSG00000093218	12	110961966	110962085
SNORD113	ENSMUSG00000089517	12	110879232	110879304
Mir300	ENSMUSG00000065419	12	110962523	110962601
AC161253.1	ENSMUSG00000092647	12	110557662	110557726
Mir434	ENSMUSG00000070133	12	110832716	110832809
Mir494	ENSMUSG00000070141	12	110953528	110953612
Mir1188	ENSMUSG00000080406	12	110850032	110850151
Mir341	ENSMUSG00000070101	12	110849710	110849805
Mir543	ENSMUSG00000076241	12	110955466	110955545
Mir377	ENSMUSG00000065438	12	110978720	110978787
AC152063.1	ENSMUSG00000077879	12	110856324	110856410
Mir654	ENSMUSG00000077980	12	110961428	110961511
Mir432	ENSMUSG00000087855	12	110833166	110833240
AF357428	ENSMUSG00000065749	12	110918155	110918223
Mir1247	ENSMUSG00000080356	12	111516258	111516339
SNORD113	ENSMUSG00000089509	12	110871978	110872052
Mir1906-1	ENSMUSG00000084535	12	110782751	110782830
SNORD113	ENSMUSG00000064496	12	110889634	110889706
Mir381	ENSMUSG00000065566	12	110965032	110965106
Mir485	ENSMUSG00000070128	12	110973109	110973187
Mir544	ENSMUSG00000077001	12	110967535	110967612
Mir127	ENSMUSG00000070076	12	110831042	110831138
AC161253.2	ENSMUSG00000093231	12	110559180	110559246
Mir541	ENSMUSG00000076052	12	110980619	110980708
Mir3070a	ENSMUSG00000092946	12	110826153	110826241
Mir345	ENSMUSG00000065429	12	110075183	110075278
SNORD113	ENSMUSG00000087885	12	110881958	110882028
Mir665	ENSMUSG00000076313	12	110824524	110824617
Mir453	ENSMUSG00000077925	12	110973829	110973910
Mir679	ENSMUSG00000076145	12	110953787	110953860
Mir493	ENSMUSG00000077025	12	110818443	110818525
Mir134	ENSMUSG00000065426	12	110972349	110972419
Mir758	ENSMUSG00000076459	12	110951020	110951100
Mir540	ENSMUSG00000072900	12	110824281	110824364
Mir323	ENSMUSG00000065617	12	110950718	110950803
SNORD113	ENSMUSG00000064545	12	110920594	110920668
Mir882	ENSMUSG00000077881	12	110920407	110920483
AC139568.1	ENSMUSG00000093173	12	109960058	109960134
Mir495	ENSMUSG00000070105	12	110956957	110957036
AC121784.3	ENSMUSG00000093224	12	110949989	110950100
Mir410	ENSMUSG00000065497	12	110981925	110982005
Mir770	ENSMUSG00000076451	12	110801902	110801995
Mir376b	ENSMUSG00000076006	12	110961666	110961751
Mir666	ENSMUSG00000076272	12	110955295	110955393
SNORD113	ENSMUSG00000064417	12	110894555	110894626
Mir329	ENSMUSG00000065577	12	110951691	110951787
Mir369	ENSMUSG00000065561	12	110981628	110981706
Wdr20a	ENSMUSG00000037957	12	111976154	112042450
Stk30	ENSMUSG00000056458	12	112046008	112079149
Zfp839	ENSMUSG00000021271	12	112088489	112107312
Gm3452	ENSMUSG00000091498	12	112096775	112097104
Cinp	ENSMUSG00000021276	12	112110832	112127325
Tecpr2	ENSMUSG00000021275	12	112127474	112210604
Ankrd9	ENSMUSG00000037904	12	112213563	112217250
Rcor1	ENSMUSG00000037896	12	112277561	112354112
4921507G05Rik	ENSMUSG00000091769	12	112079239	112082014
Gm17712	ENSMUSG00000092102	12	112080486	112083426
4930595D18Rik	ENSMUSG00000083193	12	112398061	112422702
Traf3	ENSMUSG00000021277	12	112404581	112505364
Amn	ENSMUSG00000021278	12	112509322	112514637
Cdc42bpb	ENSMUSG00000021279	12	112531183	112615929
A230065H16Rik	ENSMUSG00000087075	12	112645020	112650288
1200009I06Rik	ENSMUSG00000021280	12	112655228	112669393
Tnfaip2	ENSMUSG00000021281	12	112680680	112693229
A230087F16Rik	ENSMUSG00000086210	12	112522973	112532199
Gm10425	ENSMUSG00000072830	12	112665085	112669157
Gm266	ENSMUSG00000010529	12	112722822	112724034
Eif5	ENSMUSG00000021282	12	112776312	112794270
Snora28	ENSMUSG00000064493	12	112779152	112779278
2810029C07Rik	ENSMUSG00000091750	12	112810532	112812613
Mark3	ENSMUSG00000007411	12	112812721	112894438
Ckb	ENSMUSG00000001270	12	112907566	112910549
Trmt61a	ENSMUSG00000060950	12	112916316	112922113
Bag5	ENSMUSG00000049792	12	112947699	112951468
2810002N01Rik	ENSMUSG00000037787	12	112951472	112993191
Klc1	ENSMUSG00000021288	12	112997060	113046055
Gm15995	ENSMUSG00000090193	12	112964603	112965338
Gm15996	ENSMUSG00000090026	12	112968305	112970042
Xrcc3	ENSMUSG00000021287	12	113041403	113052084
Zfyve21	ENSMUSG00000021286	12	113052381	113066596
Ppp1r13b	ENSMUSG00000021285	12	113066668	113110826
2010107E04Rik	ENSMUSG00000021290	12	113199587	113205188
Tdrd9	ENSMUSG00000054003	12	113209770	113307065
BC048943	ENSMUSG00000091402	12	113217534	113218962
Aspg	ENSMUSG00000037686	12	113344894	113365784
Kif26a	ENSMUSG00000021294	12	113384446	113419957
Mir203	ENSMUSG00000065574	12	113369091	113369166
Mir3073	ENSMUSG00000093090	12	113347449	113347533
A730018C14Rik	ENSMUSG00000047828	12	113652126	113661423
A530016L24Rik	ENSMUSG00000043122	12	113727659	113738138
Tmem179	ENSMUSG00000054013	12	113738395	113749371
Inf2	ENSMUSG00000037679	12	113826995	113853767
Adssl1	ENSMUSG00000011148	12	113858258	113879565
Siva1	ENSMUSG00000064326	12	113883039	113887363
Akt1	ENSMUSG00000001729	12	113892032	113913095
Zbtb42	ENSMUSG00000037638	12	113917039	113920958
AW555464	ENSMUSG00000072825	12	113960385	113984802
Pld4	ENSMUSG00000052160	12	113998866	114007197
Ahnak2	ENSMUSG00000072812	12	114010405	114040868
BC022687	ENSMUSG00000037594	12	114047186	114054456
Cdca4	ENSMUSG00000047832	12	114058448	114067600
Gpr132	ENSMUSG00000021298	12	114089087	114099127
Gm17723	ENSMUSG00000091222	12	114131774	114133577
Jag2	ENSMUSG00000002799	12	114146801	114167706
Nudt14	ENSMUSG00000002804	12	114172944	114180329
Brf1	ENSMUSG00000011158	12	114198073	114238832
Btbd6	ENSMUSG00000002803	12	114214693	114217141
Pacs2	ENSMUSG00000021143	12	114252719	114312612
Tex22	ENSMUSG00000012211	12	114312713	114327128
Mta1	ENSMUSG00000021144	12	114336489	114375417
Crip2	ENSMUSG00000006356	12	114378447	114383715
Crip1	ENSMUSG00000006360	12	114390223	114392088
4930427A07Rik	ENSMUSG00000037466	12	114394632	114413736
Tmem121	ENSMUSG00000049036	12	114424114	114427731
Ighe	ENSMUSG00000087642	12	114509391	114511457
Ighg2c	ENSMUSG00000076612	12	114523536	114527141
Gm17421	ENSMUSG00000090726	12	114606713	114607927
Gm11029	ENSMUSG00000078993	12	114655095	114657149
Adam6b	ENSMUSG00000051804	12	114727756	114730229
Adam6a	ENSMUSG00000043945	12	114782119	114784625
Gm17274	ENSMUSG00000090980	12	114184574	114188723
Ighe	ENSMUSG00000076611	12	114509484	114511358
Ighg2b	ENSMUSG00000076613	12	114544600	114546144
Ighg1	ENSMUSG00000076614	12	114567187	114568734
Ighg3	ENSMUSG00000076615	12	114597876	114599443
Ighm	ENSMUSG00000076617	12	114659078	114660941
Ighj4	ENSMUSG00000076618	12	114666725	114666778
Ighj3	ENSMUSG00000076619	12	114667296	114667343
Ighj2	ENSMUSG00000076620	12	114667725	114667778
Ighj1	ENSMUSG00000076621	12	114667992	114668044
Ighd4-1	ENSMUSG00000076622	12	114668739	114668749
Ighd3-2	ENSMUSG00000076623	12	114686425	114686440
Ighd5-6	ENSMUSG00000091062	12	114687799	114687810
Ighd2-8	ENSMUSG00000076624	12	114689062	114689078
Ighd5-5	ENSMUSG00000091857	12	114693153	114693162
Ighd2-7	ENSMUSG00000076625	12	114694931	114694947
Ighd5-8	ENSMUSG00000091051	12	114698075	114698103
Ighd5-4	ENSMUSG00000091630	12	114698312	114698321
Ighd2-6	ENSMUSG00000076626	12	114699580	114699596
Ighd5-7	ENSMUSG00000092160	12	114702735	114702763
Ighd5-3	ENSMUSG00000091334	12	114702972	114702981
Ighd2-5	ENSMUSG00000076627	12	114704238	114704254
Ighd5-2	ENSMUSG00000091394	12	114707637	114707646
Ighd2-4	ENSMUSG00000076628	12	114708905	114708921
Ighd6-2	ENSMUSG00000091704	12	114713086	114713114
Ighd2-3	ENSMUSG00000076629	12	114713611	114713627
Ighd6-1	ENSMUSG00000090563	12	114718354	114718382
Ighd1-1	ENSMUSG00000076630	12	114720381	114720403
Ighd3-1	ENSMUSG00000076631	12	114763524	114763540
Ighd5-1	ENSMUSG00000091517	12	114765011	114765020
Gm16968	ENSMUSG00000076632	12	114766243	114766265
Ighv2-1	ENSMUSG00000091606	12	114812453	114812892
Ighv5-2	ENSMUSG00000076633	12	114816715	114817201
Ighv2-2	ENSMUSG00000076634	12	114826478	114826911
Ighv5-4	ENSMUSG00000076635	12	114835657	114836116
Ighv2-3	ENSMUSG00000076636	12	114849395	114849828
Ighv5-6	ENSMUSG00000076637	12	114863717	114864167
Ighv2-4	ENSMUSG00000076638	12	114891502	114891935
Gm17309	ENSMUSG00000090395	12	114893178	114893455
Ighv5-9	ENSMUSG00000076639	12	114899980	114900439
Ighv2-5	ENSMUSG00000076640	12	114923693	114924126
Ighv5-12	ENSMUSG00000076641	12	114940335	114940789
Ighv2-6	ENSMUSG00000076642	12	114954886	114955314
Ighv5-9-1	ENSMUSG00000076643	12	114974322	114974781
Ighv2-9-1	ENSMUSG00000076645	12	115008061	115008494
Ighv2-6-8	ENSMUSG00000076646	12	115034354	115034778
Ighv2-7	ENSMUSG00000076647	12	115045525	115045958
Ighv5-15	ENSMUSG00000076648	12	115064857	115065332
Ighv5-16	ENSMUSG00000076649	12	115076737	115077194
Ighv5-17	ENSMUSG00000076650	12	115097360	115097827
Ighv2-9	ENSMUSG00000076651	12	115117307	115117740
Ighv7-1	ENSMUSG00000076652	12	115134625	115135157
Ighv7-2	ENSMUSG00000076653	12	115150236	115150694
Ighv14-1	ENSMUSG00000076654	12	115170164	115170593
Ighv4-1	ENSMUSG00000076655	12	115186493	115186943
Ighv3-1	ENSMUSG00000076669	12	115202599	115202894
Ighv11-1	ENSMUSG00000076657	12	115220090	115220552
Ighv14-2	ENSMUSG00000076658	12	115232680	115233109
AC073553.3	ENSMUSG00000092748	12	114663361	114663438
AC073553.2	ENSMUSG00000092737	12	114662960	114663029
U6	ENSMUSG00000087842	12	114452360	114452463
AC073553.1	ENSMUSG00000092683	12	114662856	114662933
Ighv3-2	ENSMUSG00000078992	12	115272144	115272302
Ighv11-2	ENSMUSG00000076659	12	115286452	115286915
Ighv14-3	ENSMUSG00000076660	12	115298056	115298484
Ighv16-1	ENSMUSG00000076661	12	115307039	115307337
Ighv9-1	ENSMUSG00000076662	12	115332139	115332432
Ighv9-2	ENSMUSG00000076663	12	115347212	115347641
Ighv9-3	ENSMUSG00000076664	12	115378903	115379333
Ighv7-3	ENSMUSG00000076665	12	115391395	115391855
Fbxl21	ENSMUSG00000035509	13	56623833	56639259
Lect2	ENSMUSG00000021539	13	56643821	56649899
Tgfbi	ENSMUSG00000035493	13	56710920	56740923
Smad5	ENSMUSG00000021540	13	56804371	56843738
Trpc7	ENSMUSG00000021541	13	56874474	56997150
Spock1	ENSMUSG00000056222	13	57524451	58008948
Klhl3	ENSMUSG00000014164	13	58024533	58214953
Hnrnpa0	ENSMUSG00000007836	13	58227240	58229917
5133401N09Rik	ENSMUSG00000050002	13	58259015	58266052
Ubqln1	ENSMUSG00000005312	13	58277524	58316997
Gkap1	ENSMUSG00000021552	13	58334712	58375549
Kif27	ENSMUSG00000060176	13	58388877	58456223
2210016F16Rik	ENSMUSG00000021550	13	58481407	58486586
Hnrnpk	ENSMUSG00000021546	13	58492503	58504704
Rmi1	ENSMUSG00000035367	13	58503958	58512510
1700066J03Rik	ENSMUSG00000092091	13	58250138	58251053
Gm16613	ENSMUSG00000087320	13	58382544	58400505
Mir874	ENSMUSG00000077962	13	58124486	58124561
Mir7-1	ENSMUSG00000065434	13	58494140	58494247
[truncated: 595 more rows]

## Sheet: Venn
								47 common elements in "DT", "PT", "FHA" and "Prn":					90 common elements in "DT", "FHA" and "Prn":					292 common elements in "DT", "PT" and "Prn":					88 common elements in "DT", "PT" and "FHA":					844 common elements in "DT" and "PT":					57 common elements in "PT" and "FHA":					158 common elements in "FHA" and "Prn":					124 common elements in "PT" and "Prn":					235 common elements in "DT" and "FHA":
								ENSMUSG00000027300					ENSMUSG00000027022					ENSMUSG00000027395					ENSMUSG00000027339					ENSMUSG00000035234					ENSMUSG00000026083					ENSMUSG00000034780					ENSMUSG00000072762					ENSMUSG00000089037
								ENSMUSG00000079043					ENSMUSG00000067582					ENSMUSG00000037938					ENSMUSG00000027338					ENSMUSG00000029314					ENSMUSG00000026082					ENSMUSG00000027030					ENSMUSG00000090015					ENSMUSG00000084741
								ENSMUSG00000037703					ENSMUSG00000081973					ENSMUSG00000084826					ENSMUSG00000027335					ENSMUSG00000035187					ENSMUSG00000037138					ENSMUSG00000053896					ENSMUSG00000066613					ENSMUSG00000050558
								ENSMUSG00000068290					ENSMUSG00000082218					ENSMUSG00000082274					ENSMUSG00000062501					ENSMUSG00000029330					ENSMUSG00000048814					ENSMUSG00000079324					ENSMUSG00000090963					ENSMUSG00000027345
								ENSMUSG00000074797					ENSMUSG00000086908					ENSMUSG00000086652					ENSMUSG00000037482					ENSMUSG00000043940					ENSMUSG00000026080					ENSMUSG00000081299					ENSMUSG00000064247					ENSMUSG00000086250
								ENSMUSG00000074796					ENSMUSG00000075314					ENSMUSG00000027397					ENSMUSG00000079037					ENSMUSG00000057315					ENSMUSG00000067604					ENSMUSG00000081257					ENSMUSG00000033434					ENSMUSG00000086379
								ENSMUSG00000027309					ENSMUSG00000087043					ENSMUSG00000087528					ENSMUSG00000027316					ENSMUSG00000087611					ENSMUSG00000026078					ENSMUSG00000081899					ENSMUSG00000023284					ENSMUSG00000027346
								ENSMUSG00000089662					ENSMUSG00000087467					ENSMUSG00000056738					ENSMUSG00000027318					ENSMUSG00000092503					ENSMUSG00000026077					ENSMUSG00000085182					ENSMUSG00000014668					ENSMUSG00000074783
								ENSMUSG00000084694					ENSMUSG00000083910					ENSMUSG00000085485					ENSMUSG00000083953					ENSMUSG00000092354					ENSMUSG00000073702					ENSMUSG00000075312					ENSMUSG00000029502					ENSMUSG00000044991
								ENSMUSG00000027312					ENSMUSG00000088043					ENSMUSG00000048327					ENSMUSG00000087405					ENSMUSG00000077354					ENSMUSG00000003134					ENSMUSG00000082836					ENSMUSG00000029501					ENSMUSG00000081445
								ENSMUSG00000085566					ENSMUSG00000044864					ENSMUSG00000085498					ENSMUSG00000086329					ENSMUSG00000046709					ENSMUSG00000003135					ENSMUSG00000088365					ENSMUSG00000029500					ENSMUSG00000084089
								ENSMUSG00000080989					ENSMUSG00000092986					ENSMUSG00000027399					ENSMUSG00000082044					ENSMUSG00000029491					ENSMUSG00000048234					ENSMUSG00000027035					ENSMUSG00000029499					ENSMUSG00000081662
								ENSMUSG00000042184					ENSMUSG00000076385					ENSMUSG00000065057					ENSMUSG00000081652					ENSMUSG00000050856					ENSMUSG00000050967					ENSMUSG00000027288					ENSMUSG00000091434					ENSMUSG00000084839
								ENSMUSG00000053334					ENSMUSG00000086181					ENSMUSG00000082097					ENSMUSG00000083671					ENSMUSG00000029490					ENSMUSG00000057173					ENSMUSG00000027313					ENSMUSG00000085131					ENSMUSG00000064413
								ENSMUSG00000018974					ENSMUSG00000050533					ENSMUSG00000027398					ENSMUSG00000087524					ENSMUSG00000033623					ENSMUSG00000085391					ENSMUSG00000023216					ENSMUSG00000049477					ENSMUSG00000028019
								ENSMUSG00000069196					ENSMUSG00000046743					ENSMUSG00000074805					ENSMUSG00000086831					ENSMUSG00000033615					ENSMUSG00000085280					ENSMUSG00000027287					ENSMUSG00000081865					ENSMUSG00000056023
								ENSMUSG00000025825					ENSMUSG00000064825					ENSMUSG00000081888					ENSMUSG00000086822					ENSMUSG00000062234					ENSMUSG00000087131					ENSMUSG00000034154					ENSMUSG00000086247					ENSMUSG00000028015
								ENSMUSG00000054675					ENSMUSG00000089520					ENSMUSG00000043727					ENSMUSG00000081422					ENSMUSG00000013495					ENSMUSG00000092553					ENSMUSG00000048647					ENSMUSG00000087439					ENSMUSG00000028011
								ENSMUSG00000048163					ENSMUSG00000065945					ENSMUSG00000086637					ENSMUSG00000083469					ENSMUSG00000004815					ENSMUSG00000092563					ENSMUSG00000014077					ENSMUSG00000087494					ENSMUSG00000028008
								ENSMUSG00000004530					ENSMUSG00000066975					ENSMUSG00000087015					ENSMUSG00000081229					ENSMUSG00000033540					ENSMUSG00000085894					ENSMUSG00000072980					ENSMUSG00000081683					ENSMUSG00000028005
								ENSMUSG00000090458					ENSMUSG00000029343					ENSMUSG00000037902					ENSMUSG00000082990					ENSMUSG00000046959					ENSMUSG00000090677					ENSMUSG00000027306					ENSMUSG00000029423					ENSMUSG00000033910
								ENSMUSG00000065320					ENSMUSG00000029344					ENSMUSG00000027400					ENSMUSG00000086756					ENSMUSG00000008090					ENSMUSG00000064936					ENSMUSG00000027305					ENSMUSG00000029420					ENSMUSG00000033900
								ENSMUSG00000042121					ENSMUSG00000086878					ENSMUSG00000084328					ENSMUSG00000027340					ENSMUSG00000055385					ENSMUSG00000077704					ENSMUSG00000027304					ENSMUSG00000072591					ENSMUSG00000028004
								ENSMUSG00000042096					ENSMUSG00000029345					ENSMUSG00000083589					ENSMUSG00000027322					ENSMUSG00000060730					ENSMUSG00000065629					ENSMUSG00000027296					ENSMUSG00000089856					ENSMUSG00000033882
	5 common elements in "PT", "FHA" and "Prn":							ENSMUSG00000042078					ENSMUSG00000029346					ENSMUSG00000037885					ENSMUSG00000074793					ENSMUSG00000004821					ENSMUSG00000028266					ENSMUSG00000027297					ENSMUSG00000029428					ENSMUSG00000028003
	ENSMUSG00000059586							ENSMUSG00000029592					ENSMUSG00000042328					ENSMUSG00000027401					ENSMUSG00000079039					ENSMUSG00000090961					ENSMUSG00000040151					ENSMUSG00000034032					ENSMUSG00000029430					ENSMUSG00000033860
	ENSMUSG00000032501							ENSMUSG00000089734					ENSMUSG00000051503					ENSMUSG00000089152					ENSMUSG00000027327					ENSMUSG00000091624					ENSMUSG00000037072					ENSMUSG00000027298					ENSMUSG00000044017					ENSMUSG00000028001
	ENSMUSG00000071750							ENSMUSG00000044339					ENSMUSG00000029348					ENSMUSG00000077348					ENSMUSG00000027329					ENSMUSG00000093756					ENSMUSG00000064960					ENSMUSG00000027286					ENSMUSG00000060419					ENSMUSG00000033831
	ENSMUSG00000071749							ENSMUSG00000029591					ENSMUSG00000093637					ENSMUSG00000074804					ENSMUSG00000068267					ENSMUSG00000093479					ENSMUSG00000088851					ENSMUSG00000027285					ENSMUSG00000091606					ENSMUSG00000086273
	ENSMUSG00000077511							ENSMUSG00000042010					ENSMUSG00000058153					ENSMUSG00000027403					ENSMUSG00000027330					ENSMUSG00000093510					ENSMUSG00000037062					ENSMUSG00000033705					ENSMUSG00000076633					ENSMUSG00000027998
								ENSMUSG00000042002					ENSMUSG00000072722					ENSMUSG00000027404					ENSMUSG00000068264					ENSMUSG00000054256					ENSMUSG00000042256					ENSMUSG00000062646					ENSMUSG00000076634					ENSMUSG00000089444
								ENSMUSG00000066952					ENSMUSG00000072720					ENSMUSG00000060332					ENSMUSG00000037523					ENSMUSG00000057354					ENSMUSG00000043972					ENSMUSG00000079110					ENSMUSG00000076635					ENSMUSG00000087902
								ENSMUSG00000084243					ENSMUSG00000042249					ENSMUSG00000027405					ENSMUSG00000037514					ENSMUSG00000086352					ENSMUSG00000023918					ENSMUSG00000053675					ENSMUSG00000076636					ENSMUSG00000028133
								ENSMUSG00000001098					ENSMUSG00000065373					ENSMUSG00000027406					ENSMUSG00000048911					ENSMUSG00000087292					ENSMUSG00000057899					ENSMUSG00000079103					ENSMUSG00000076637					ENSMUSG00000028132
								ENSMUSG00000029577					ENSMUSG00000042240					ENSMUSG00000065272					ENSMUSG00000027333					ENSMUSG00000029522					ENSMUSG00000061665					ENSMUSG00000091714					ENSMUSG00000076638					ENSMUSG00000039887
								ENSMUSG00000085590					ENSMUSG00000029352					ENSMUSG00000093645					ENSMUSG00000089113					ENSMUSG00000029524					ENSMUSG00000023915					ENSMUSG00000081572					ENSMUSG00000090395					ENSMUSG00000053931
								ENSMUSG00000089854					ENSMUSG00000051339					ENSMUSG00000080610					ENSMUSG00000092654					ENSMUSG00000029528					ENSMUSG00000041293					ENSMUSG00000084015					ENSMUSG00000076639					ENSMUSG00000039865
								ENSMUSG00000090232					ENSMUSG00000066964					ENSMUSG00000065287					ENSMUSG00000065563					ENSMUSG00000081282					ENSMUSG00000056492					ENSMUSG00000074912					ENSMUSG00000076640					ENSMUSG00000044522
								ENSMUSG00000089868					ENSMUSG00000042216					ENSMUSG00000065289					ENSMUSG00000027341					ENSMUSG00000075998					ENSMUSG00000023914					ENSMUSG00000082369					ENSMUSG00000076641					ENSMUSG00000074248
								ENSMUSG00000021458					ENSMUSG00000093343					ENSMUSG00000053552					ENSMUSG00000027342					ENSMUSG00000075779					ENSMUSG00000023913					ENSMUSG00000085438					ENSMUSG00000076642					ENSMUSG00000028128
								ENSMUSG00000021461					ENSMUSG00000053873					ENSMUSG00000027303					ENSMUSG00000087377					ENSMUSG00000086849					ENSMUSG00000040140					ENSMUSG00000082029					ENSMUSG00000076643					ENSMUSG00000028127
								ENSMUSG00000021466					ENSMUSG00000063430					ENSMUSG00000037773					ENSMUSG00000058793					ENSMUSG00000067274					ENSMUSG00000023912					ENSMUSG00000081416					ENSMUSG00000076645					ENSMUSG00000091716
								ENSMUSG00000021470					ENSMUSG00000042190					ENSMUSG00000049692					ENSMUSG00000060402					ENSMUSG00000041638					ENSMUSG00000023963					ENSMUSG00000081056					ENSMUSG00000076646					ENSMUSG00000086471
								ENSMUSG00000086950					ENSMUSG00000085571					ENSMUSG00000037740					ENSMUSG00000063931					ENSMUSG00000029518					ENSMUSG00000039601					ENSMUSG00000087458					ENSMUSG00000076647					ENSMUSG00000093177
								ENSMUSG00000065475					ENSMUSG00000085713					ENSMUSG00000027301					ENSMUSG00000077469					ENSMUSG00000041609					ENSMUSG00000023960					ENSMUSG00000087555					ENSMUSG00000076648					ENSMUSG00000084674
								ENSMUSG00000092741					ENSMUSG00000045095					ENSMUSG00000037727					ENSMUSG00000056216					ENSMUSG00000083833					ENSMUSG00000023961					ENSMUSG00000081105					ENSMUSG00000076649					ENSMUSG00000039831
								ENSMUSG00000065599					ENSMUSG00000019944					ENSMUSG00000027411					ENSMUSG00000034957					ENSMUSG00000029516					ENSMUSG00000090307					ENSMUSG00000087519					ENSMUSG00000076650					ENSMUSG00000028125
													ENSMUSG00000090622					ENSMUSG00000083483					ENSMUSG00000030495					ENSMUSG00000029513					ENSMUSG00000064582					ENSMUSG00000081313					ENSMUSG00000076651					ENSMUSG00000084912
													ENSMUSG00000077315					ENSMUSG00000082985					ENSMUSG00000001802					ENSMUSG00000079278					ENSMUSG00000084474					ENSMUSG00000091181					ENSMUSG00000076652					ENSMUSG00000078592
													ENSMUSG00000019942					ENSMUSG00000060029					ENSMUSG00000088799					ENSMUSG00000085376					ENSMUSG00000088576					ENSMUSG00000033808					ENSMUSG00000076653					ENSMUSG00000092934
													ENSMUSG00000069601					ENSMUSG00000027409					ENSMUSG00000093715					ENSMUSG00000084992					ENSMUSG00000023959					ENSMUSG00000027323					ENSMUSG00000076654					ENSMUSG00000028124
													ENSMUSG00000048701					ENSMUSG00000027408					ENSMUSG00000093153					ENSMUSG00000090728					ENSMUSG00000039153					ENSMUSG00000070730					ENSMUSG00000076655					ENSMUSG00000039756
													ENSMUSG00000019933					ENSMUSG00000077004					ENSMUSG00000088307					ENSMUSG00000029482					ENSMUSG00000092206					ENSMUSG00000046814					ENSMUSG00000076669					ENSMUSG00000093392
													ENSMUSG00000037762					ENSMUSG00000007080					ENSMUSG00000063808					ENSMUSG00000070498					ENSMUSG00000090048					ENSMUSG00000034278					ENSMUSG00000076657					ENSMUSG00000057359
													ENSMUSG00000089835					ENSMUSG00000029503					ENSMUSG00000030494					ENSMUSG00000029483					ENSMUSG00000070209					ENSMUSG00000055926					ENSMUSG00000076658					ENSMUSG00000076456
													ENSMUSG00000052426					ENSMUSG00000072754					ENSMUSG00000030493					ENSMUSG00000091970					ENSMUSG00000064783					ENSMUSG00000068580					ENSMUSG00000078992					ENSMUSG00000028121
													ENSMUSG00000043259					ENSMUSG00000043323					ENSMUSG00000023072					ENSMUSG00000070220					ENSMUSG00000088907					ENSMUSG00000027317					ENSMUSG00000076659					ENSMUSG00000087743
													ENSMUSG00000037747					ENSMUSG00000033316					ENSMUSG00000030492					ENSMUSG00000084551										ENSMUSG00000027315					ENSMUSG00000076660					ENSMUSG00000039735
													ENSMUSG00000047692					ENSMUSG00000033294					ENSMUSG00000030491					ENSMUSG00000090624										ENSMUSG00000034226					ENSMUSG00000076661					ENSMUSG00000053965
													ENSMUSG00000014329					ENSMUSG00000029504					ENSMUSG00000056043					ENSMUSG00000029810										ENSMUSG00000034216					ENSMUSG00000076662					ENSMUSG00000091611
													ENSMUSG00000087774					ENSMUSG00000029505					ENSMUSG00000034867					ENSMUSG00000023367										ENSMUSG00000027314					ENSMUSG00000076663					ENSMUSG00000086397
													ENSMUSG00000065292					ENSMUSG00000029507					ENSMUSG00000034875					ENSMUSG00000073090										ENSMUSG00000033852					ENSMUSG00000076664					ENSMUSG00000023057
													ENSMUSG00000019943					ENSMUSG00000029512					ENSMUSG00000084801					ENSMUSG00000029811										ENSMUSG00000074899					ENSMUSG00000076665					ENSMUSG00000078590
													ENSMUSG00000019952					ENSMUSG00000043510					ENSMUSG00000066543					ENSMUSG00000029813										ENSMUSG00000027293					ENSMUSG00000074868					ENSMUSG00000054091
													ENSMUSG00000090035					ENSMUSG00000029521					ENSMUSG00000030417					ENSMUSG00000068537										ENSMUSG00000050211					ENSMUSG00000064997					ENSMUSG00000039701
													ENSMUSG00000055108					ENSMUSG00000090661					ENSMUSG00000043671					ENSMUSG00000068536										ENSMUSG00000070719					ENSMUSG00000092904					ENSMUSG00000028116
													ENSMUSG00000019960					ENSMUSG00000081256					ENSMUSG00000044452					ENSMUSG00000039215										ENSMUSG00000046971					ENSMUSG00000077057					ENSMUSG00000076949
													ENSMUSG00000044633					ENSMUSG00000085606					ENSMUSG00000044997					ENSMUSG00000029816										ENSMUSG00000027291					ENSMUSG00000087978					ENSMUSG00000050315
													ENSMUSG00000090665					ENSMUSG00000048215					ENSMUSG00000024727					ENSMUSG00000029815										ENSMUSG00000033943					ENSMUSG00000072568					ENSMUSG00000074196
													ENSMUSG00000046934					ENSMUSG00000086401					ENSMUSG00000036192					ENSMUSG00000029814										ENSMUSG00000033902					ENSMUSG00000022347					ENSMUSG00000074195
													ENSMUSG00000019966					ENSMUSG00000033209					ENSMUSG00000047168					ENSMUSG00000029817										ENSMUSG00000090100					ENSMUSG00000044513					ENSMUSG00000068547
													ENSMUSG00000089994					ENSMUSG00000081104					ENSMUSG00000024659					ENSMUSG00000050786										ENSMUSG00000027272					ENSMUSG00000077627					ENSMUSG00000028255
													ENSMUSG00000077034					ENSMUSG00000091066					ENSMUSG00000053279					ENSMUSG00000047115										ENSMUSG00000027284					ENSMUSG00000022665					ENSMUSG00000036960
													ENSMUSG00000077043					ENSMUSG00000065775					ENSMUSG00000024747					ENSMUSG00000023403										ENSMUSG00000054484					ENSMUSG00000022664					ENSMUSG00000028256
													ENSMUSG00000066553					ENSMUSG00000077254					ENSMUSG00000024749					ENSMUSG00000029819										ENSMUSG00000023572					ENSMUSG00000022663					ENSMUSG00000085773
													ENSMUSG00000057160					ENSMUSG00000065071					ENSMUSG00000093628					ENSMUSG00000038388										ENSMUSG00000065083					ENSMUSG00000052013					ENSMUSG00000085761
													ENSMUSG00000059669					ENSMUSG00000087722					ENSMUSG00000093772					ENSMUSG00000029821										ENSMUSG00000065164					ENSMUSG00000022661					ENSMUSG00000085574
													ENSMUSG00000020656					ENSMUSG00000029575					ENSMUSG00000032702					ENSMUSG00000029822										ENSMUSG00000064906					ENSMUSG00000053182					ENSMUSG00000081079
													ENSMUSG00000020653					ENSMUSG00000041939					ENSMUSG00000024837					ENSMUSG00000089335										ENSMUSG00000065883					ENSMUSG00000033210					ENSMUSG00000085424
													ENSMUSG00000062563					ENSMUSG00000086302					ENSMUSG00000042372					ENSMUSG00000093275										ENSMUSG00000064722					ENSMUSG00000022659					ENSMUSG00000073728
													ENSMUSG00000020649					ENSMUSG00000041930					ENSMUSG00000048138					ENSMUSG00000055594										ENSMUSG00000072387					ENSMUSG00000033187					ENSMUSG00000087525
													ENSMUSG00000020646					ENSMUSG00000014158					ENSMUSG00000024921					ENSMUSG00000032758										ENSMUSG00000049100					ENSMUSG00000033177					ENSMUSG00000085816
													ENSMUSG00000036333					ENSMUSG00000011884					ENSMUSG00000074913					ENSMUSG00000030199										ENSMUSG00000090919					ENSMUSG00000022658					ENSMUSG00000082201
													ENSMUSG00000020644					ENSMUSG00000002486					ENSMUSG00000024924					ENSMUSG00000030200										ENSMUSG00000086101					ENSMUSG00000033157					ENSMUSG00000081838
													ENSMUSG00000089203					ENSMUSG00000041890					ENSMUSG00000047298					ENSMUSG00000030201										ENSMUSG00000064579					ENSMUSG00000033149					ENSMUSG00000083826
													ENSMUSG00000089441					ENSMUSG00000041870					ENSMUSG00000084589					ENSMUSG00000032718										ENSMUSG00000088739					ENSMUSG00000087141					ENSMUSG00000051435
													ENSMUSG00000020642					ENSMUSG00000072694					ENSMUSG00000064843					ENSMUSG00000042992										ENSMUSG00000089584					ENSMUSG00000022657					ENSMUSG00000040616
													ENSMUSG00000020641					ENSMUSG00000092252					ENSMUSG00000041360					ENSMUSG00000030203										ENSMUSG00000077256					ENSMUSG00000048087					ENSMUSG00000040606
													ENSMUSG00000020638					ENSMUSG00000092279										ENSMUSG00000032652										ENSMUSG00000029695					ENSMUSG00000062284					ENSMUSG00000057637
													ENSMUSG00000077535					ENSMUSG00000092486										ENSMUSG00000032641										ENSMUSG00000029697					ENSMUSG00000080715					ENSMUSG00000087903
																		ENSMUSG00000078186										ENSMUSG00000003031										ENSMUSG00000017978					ENSMUSG00000081303					ENSMUSG00000085413
																		ENSMUSG00000029564										ENSMUSG00000090698										ENSMUSG00000051956					ENSMUSG00000089630					ENSMUSG00000068180
																		ENSMUSG00000054123										ENSMUSG00000030204										ENSMUSG00000078179					ENSMUSG00000086237					ENSMUSG00000030031
																		ENSMUSG00000092183										ENSMUSG00000091438										ENSMUSG00000043865					ENSMUSG00000086398					ENSMUSG00000068181
																		ENSMUSG00000078187										ENSMUSG00000092134										ENSMUSG00000029700					ENSMUSG00000085781					ENSMUSG00000061838
																		ENSMUSG00000082052										ENSMUSG00000093148										ENSMUSG00000071564					ENSMUSG00000085826					ENSMUSG00000045100
																		ENSMUSG00000029561										ENSMUSG00000077115										ENSMUSG00000071563					ENSMUSG00000064821					ENSMUSG00000030029
																		ENSMUSG00000041827										ENSMUSG00000077093										ENSMUSG00000093580					ENSMUSG00000088503					ENSMUSG00000092767
																		ENSMUSG00000029559										ENSMUSG00000090342										ENSMUSG00000088885					ENSMUSG00000022656					ENSMUSG00000065063
																		ENSMUSG00000029556										ENSMUSG00000091545										ENSMUSG00000093255					ENSMUSG00000081624					ENSMUSG00000088595
																		ENSMUSG00000029550										ENSMUSG00000091544										ENSMUSG00000090212					ENSMUSG00000084503					ENSMUSG00000059187
																		ENSMUSG00000080707										ENSMUSG00000078802										ENSMUSG00000003923					ENSMUSG00000087732					ENSMUSG00000072878
																		ENSMUSG00000087477										ENSMUSG00000061026										ENSMUSG00000019927					ENSMUSG00000023827					ENSMUSG00000065239
																		ENSMUSG00000086054										ENSMUSG00000058685										ENSMUSG00000091739					ENSMUSG00000014426					ENSMUSG00000077598
																		ENSMUSG00000086140										ENSMUSG00000091930										ENSMUSG00000091918					ENSMUSG00000079716					ENSMUSG00000046500
																		ENSMUSG00000072693										ENSMUSG00000043066										ENSMUSG00000091101					ENSMUSG00000063911					ENSMUSG00000035245
																		ENSMUSG00000029545										ENSMUSG00000034122										ENSMUSG00000090421					ENSMUSG00000059481					ENSMUSG00000030059
																		ENSMUSG00000046562										ENSMUSG00000046716										ENSMUSG00000091715					ENSMUSG00000023828					ENSMUSG00000030061
																		ENSMUSG00000048578										ENSMUSG00000030393										ENSMUSG00000091552					ENSMUSG00000091214					ENSMUSG00000035199
																		ENSMUSG00000029544										ENSMUSG00000047031										ENSMUSG00000091170					ENSMUSG00000077476					ENSMUSG00000044086
																		ENSMUSG00000086167										ENSMUSG00000091662										ENSMUSG00000091145					ENSMUSG00000078247					ENSMUSG00000065728
																		ENSMUSG00000072692										ENSMUSG00000045340										ENSMUSG00000091915					ENSMUSG00000089769					ENSMUSG00000030064
																		ENSMUSG00000083182										ENSMUSG00000091026										ENSMUSG00000090987					ENSMUSG00000089817					ENSMUSG00000064724
																		ENSMUSG00000060152										ENSMUSG00000034087										ENSMUSG00000036676					ENSMUSG00000040966					ENSMUSG00000065017
																		ENSMUSG00000041740										ENSMUSG00000059206										ENSMUSG00000019971					ENSMUSG00000023829					ENSMUSG00000064571
																		ENSMUSG00000041733										ENSMUSG00000091643										ENSMUSG00000091738					ENSMUSG00000023830					ENSMUSG00000035158
																		ENSMUSG00000009013										ENSMUSG00000078801										ENSMUSG00000089855					ENSMUSG00000091640					ENSMUSG00000083086
																		ENSMUSG00000029538										ENSMUSG00000093689										ENSMUSG00000084399					ENSMUSG00000068037					ENSMUSG00000089464
																		ENSMUSG00000029536										ENSMUSG00000093478										ENSMUSG00000089904					ENSMUSG00000059408					ENSMUSG00000090667
																		ENSMUSG00000029535										ENSMUSG00000093681										ENSMUSG00000085282					ENSMUSG00000073460					ENSMUSG00000077813
																		ENSMUSG00000041697										ENSMUSG00000093766										ENSMUSG00000036019					ENSMUSG00000057388					ENSMUSG00000021217
																		ENSMUSG00000083875										ENSMUSG00000093781										ENSMUSG00000036009					ENSMUSG00000068039					ENSMUSG00000043456
																		ENSMUSG00000082610										ENSMUSG00000093487										ENSMUSG00000019897					ENSMUSG00000089525					ENSMUSG00000093359
																		ENSMUSG00000086368										ENSMUSG00000093595										ENSMUSG00000056877					ENSMUSG00000092913					ENSMUSG00000093216
																		ENSMUSG00000034324										ENSMUSG00000093418										ENSMUSG00000089019										ENSMUSG00000089273
																		ENSMUSG00000029416										ENSMUSG00000093534										ENSMUSG00000077407										ENSMUSG00000039099
																		ENSMUSG00000049971										ENSMUSG00000054272										ENSMUSG00000080525										ENSMUSG00000039194
																		ENSMUSG00000034310										ENSMUSG00000076224										ENSMUSG00000064432										ENSMUSG00000039187
																		ENSMUSG00000087104										ENSMUSG00000040614										ENSMUSG00000088415										ENSMUSG00000030544
																		ENSMUSG00000061331										ENSMUSG00000086868										ENSMUSG00000084545										ENSMUSG00000030543
																		ENSMUSG00000085328										ENSMUSG00000084974										ENSMUSG00000088084										ENSMUSG00000039062
																		ENSMUSG00000077816										ENSMUSG00000040601										ENSMUSG00000051225										ENSMUSG00000039176
																		ENSMUSG00000083193										ENSMUSG00000054102										ENSMUSG00000022362										ENSMUSG00000030610
																		ENSMUSG00000021277										ENSMUSG00000091924										ENSMUSG00000022361										ENSMUSG00000030609
																		ENSMUSG00000021278										ENSMUSG00000040650										ENSMUSG00000022360										ENSMUSG00000039236
																		ENSMUSG00000021279										ENSMUSG00000066704										ENSMUSG00000022359										ENSMUSG00000030549
																		ENSMUSG00000086210										ENSMUSG00000049685										ENSMUSG00000022358										ENSMUSG00000046591
																		ENSMUSG00000087075										ENSMUSG00000005547										ENSMUSG00000022357										ENSMUSG00000087186
																		ENSMUSG00000021280										ENSMUSG00000091867										ENSMUSG00000055114										ENSMUSG00000085554
																		ENSMUSG00000021281										ENSMUSG00000060407										ENSMUSG00000037119										ENSMUSG00000050382
																		ENSMUSG00000010529										ENSMUSG00000052974										ENSMUSG00000037106										ENSMUSG00000039133
																		ENSMUSG00000072830										ENSMUSG00000078787										ENSMUSG00000062373										ENSMUSG00000030546
																		ENSMUSG00000021282										ENSMUSG00000058709										ENSMUSG00000061490										ENSMUSG00000082400
																		ENSMUSG00000007411										ENSMUSG00000053291										ENSMUSG00000037085										ENSMUSG00000030545
																		ENSMUSG00000091750										ENSMUSG00000089661										ENSMUSG00000037075										ENSMUSG00000030607
																		ENSMUSG00000064493										ENSMUSG00000061479										ENSMUSG00000050891										ENSMUSG00000030606
																		ENSMUSG00000001270										ENSMUSG00000078786										ENSMUSG00000022354										ENSMUSG00000030605
																		ENSMUSG00000060950										ENSMUSG00000003752										ENSMUSG00000022353										ENSMUSG00000039202
																		ENSMUSG00000049792										ENSMUSG00000003762										ENSMUSG00000025922										ENSMUSG00000059146
																		ENSMUSG00000037787										ENSMUSG00000063160										ENSMUSG00000022351										ENSMUSG00000052629
																		ENSMUSG00000021288										ENSMUSG00000080533										ENSMUSG00000022350										ENSMUSG00000030612
																		ENSMUSG00000021287										ENSMUSG00000093348										ENSMUSG00000086801										ENSMUSG00000030611
																		ENSMUSG00000090193										ENSMUSG00000077509										ENSMUSG00000093677										ENSMUSG00000065609
																		ENSMUSG00000090026										ENSMUSG00000003436										ENSMUSG00000064597										ENSMUSG00000089453
																		ENSMUSG00000021286										ENSMUSG00000046750										ENSMUSG00000089504										ENSMUSG00000092873
																		ENSMUSG00000021285										ENSMUSG00000007944										ENSMUSG00000084485										ENSMUSG00000064940
																		ENSMUSG00000021290										ENSMUSG00000008384										ENSMUSG00000080461										ENSMUSG00000093238
																		ENSMUSG00000054003										ENSMUSG00000055200										ENSMUSG00000065049										ENSMUSG00000080603
																		ENSMUSG00000091402										ENSMUSG00000090904																				ENSMUSG00000063801
																		ENSMUSG00000037686										ENSMUSG00000003438																				ENSMUSG00000039043
																		ENSMUSG00000021294										ENSMUSG00000003435																				ENSMUSG00000090948
																		ENSMUSG00000065574										ENSMUSG00000040390																				ENSMUSG00000091217
																		ENSMUSG00000093090										ENSMUSG00000057093																				ENSMUSG00000048897
																		ENSMUSG00000047828										ENSMUSG00000037640																				ENSMUSG00000077059
																		ENSMUSG00000043122										ENSMUSG00000030604																				ENSMUSG00000030541
																		ENSMUSG00000054013										ENSMUSG00000078779																				ENSMUSG00000060044
																		ENSMUSG00000037679										ENSMUSG00000020420																				ENSMUSG00000058934
																		ENSMUSG00000011148										ENSMUSG00000070709																				ENSMUSG00000020053
																		ENSMUSG00000064326										ENSMUSG00000063047																				ENSMUSG00000035383
																		ENSMUSG00000001729										ENSMUSG00000074608																				ENSMUSG00000035365
																		ENSMUSG00000037638										ENSMUSG00000030603																				ENSMUSG00000035351
																		ENSMUSG00000072825										ENSMUSG00000047730																				ENSMUSG00000020056
																		ENSMUSG00000052160										ENSMUSG00000078384																				ENSMUSG00000020057
																		ENSMUSG00000072812										ENSMUSG00000083622																				ENSMUSG00000035311
																		ENSMUSG00000037594										ENSMUSG00000082016																				ENSMUSG00000060002
																		ENSMUSG00000047832										ENSMUSG00000087371																				ENSMUSG00000020059
																		ENSMUSG00000021298										ENSMUSG00000074243																				ENSMUSG00000020061
																		ENSMUSG00000091222										ENSMUSG00000089832																				ENSMUSG00000087429
																		ENSMUSG00000002799										ENSMUSG00000092367																				ENSMUSG00000091432
																		ENSMUSG00000002804										ENSMUSG00000011751																				ENSMUSG00000088843
																		ENSMUSG00000090980										ENSMUSG00000040466																				ENSMUSG00000004359
																		ENSMUSG00000011158										ENSMUSG00000053198																				ENSMUSG00000065005
																		ENSMUSG00000002803										ENSMUSG00000040424																				ENSMUSG00000060904
																		ENSMUSG00000021143										ENSMUSG00000003363																				ENSMUSG00000004356
																		ENSMUSG00000012211										ENSMUSG00000049643																				ENSMUSG00000020062
																		ENSMUSG00000021144										ENSMUSG00000078776																				ENSMUSG00000035189
																		ENSMUSG00000006356										ENSMUSG00000046865																				ENSMUSG00000069540
																		ENSMUSG00000006360										ENSMUSG00000002409																				ENSMUSG00000074802
																		ENSMUSG00000037466										ENSMUSG00000046058																				ENSMUSG00000047638
																		ENSMUSG00000049036										ENSMUSG00000070705																				ENSMUSG00000019935
																		ENSMUSG00000087842										ENSMUSG00000040488																				ENSMUSG00000069539
																		ENSMUSG00000087642										ENSMUSG00000004056																				ENSMUSG00000019948
																		ENSMUSG00000076611										ENSMUSG00000064793																				ENSMUSG00000019951
																		ENSMUSG00000076612										ENSMUSG00000080562																				ENSMUSG00000091581
																		ENSMUSG00000076613										ENSMUSG00000036578																				ENSMUSG00000087686
																		ENSMUSG00000076614										ENSMUSG00000006311																				ENSMUSG00000092642
																		ENSMUSG00000090726										ENSMUSG00000036845																				ENSMUSG00000058589
																		ENSMUSG00000076615										ENSMUSG00000046185																				ENSMUSG00000019979
																		ENSMUSG00000078993										ENSMUSG00000085458																				ENSMUSG00000088221
																		ENSMUSG00000076617										ENSMUSG00000006315																				ENSMUSG00000064402
																		ENSMUSG00000076618										ENSMUSG00000061099																				ENSMUSG00000087966
																		ENSMUSG00000076619										ENSMUSG00000078767																				ENSMUSG00000019975
																		ENSMUSG00000076620										ENSMUSG00000081565																				ENSMUSG00000061904
																		ENSMUSG00000076621										ENSMUSG00000087009																				ENSMUSG00000019961
																		ENSMUSG00000076622										ENSMUSG00000062132																				ENSMUSG00000092024
																		ENSMUSG00000076623										ENSMUSG00000091271																				ENSMUSG00000077167
																		ENSMUSG00000091062										ENSMUSG00000090357																				ENSMUSG00000090412
																		ENSMUSG00000076624										ENSMUSG00000006649																				ENSMUSG00000077818
																		ENSMUSG00000091857										ENSMUSG00000030583																				ENSMUSG00000020121
																		ENSMUSG00000076625										ENSMUSG00000074224																				ENSMUSG00000034620
																		ENSMUSG00000091051										ENSMUSG00000046958																				ENSMUSG00000020123
																		ENSMUSG00000091630										ENSMUSG00000051976																				ENSMUSG00000086315
																		ENSMUSG00000092748										ENSMUSG00000049123																				ENSMUSG00000047446
																		ENSMUSG00000092737										ENSMUSG00000036835																				ENSMUSG00000090387
																		ENSMUSG00000092683										ENSMUSG00000078765																				ENSMUSG00000090582
																		ENSMUSG00000076626										ENSMUSG00000049761																				ENSMUSG00000035983
																		ENSMUSG00000092160										ENSMUSG00000013083																				ENSMUSG00000055917
																		ENSMUSG00000091334										ENSMUSG00000066620																				ENSMUSG00000035954
																		ENSMUSG00000076627										ENSMUSG00000005553																				ENSMUSG00000071342
																		ENSMUSG00000091394										ENSMUSG00000019194																				ENSMUSG00000001627
																		ENSMUSG00000076628										ENSMUSG00000001248																				ENSMUSG00000002565
																		ENSMUSG00000091704										ENSMUSG00000062556																				ENSMUSG00000089371
																		ENSMUSG00000076629										ENSMUSG00000036521																				ENSMUSG00000033122
																		ENSMUSG00000090563										ENSMUSG00000078754																				ENSMUSG00000033114
																		ENSMUSG00000076630										ENSMUSG00000090331																				ENSMUSG00000044934
																		ENSMUSG00000051804										ENSMUSG00000083669																				ENSMUSG00000021476
																		ENSMUSG00000043945										ENSMUSG00000092015																				ENSMUSG00000033102
																		ENSMUSG00000076631										ENSMUSG00000092079																				ENSMUSG00000021482
																		ENSMUSG00000091517										ENSMUSG00000087359																				ENSMUSG00000021477
																		ENSMUSG00000076632										ENSMUSG00000091324																				ENSMUSG00000021483
																		ENSMUSG00000092062										ENSMUSG00000036570																				ENSMUSG00000033063
																		ENSMUSG00000074863										ENSMUSG00000036560																				ENSMUSG00000074861
																		ENSMUSG00000074867										ENSMUSG00000057092																				ENSMUSG00000089092
																		ENSMUSG00000069117										ENSMUSG00000001249																				ENSMUSG00000092636
																		ENSMUSG00000091183										ENSMUSG00000046056																				ENSMUSG00000061080
																		ENSMUSG00000055228										ENSMUSG00000060962
																		ENSMUSG00000074865										ENSMUSG00000074199
																		ENSMUSG00000072066										ENSMUSG00000051314
																		ENSMUSG00000021456										ENSMUSG00000019429
																		ENSMUSG00000069805										ENSMUSG00000044453
																		ENSMUSG00000091141										ENSMUSG00000030577
																		ENSMUSG00000080346										ENSMUSG00000036634
																		ENSMUSG00000075708										ENSMUSG00000056978
																		ENSMUSG00000076244										ENSMUSG00000050440
																		ENSMUSG00000088727										ENSMUSG00000058239
																		ENSMUSG00000089002										ENSMUSG00000001247
																		ENSMUSG00000075946										ENSMUSG00000046826
																		ENSMUSG00000076248										ENSMUSG00000009687
																		ENSMUSG00000076246										ENSMUSG00000036915
																		ENSMUSG00000076250										ENSMUSG00000036751
																		ENSMUSG00000022346										ENSMUSG00000006310
																		ENSMUSG00000056590										ENSMUSG00000006313
																		ENSMUSG00000072566										ENSMUSG00000036864
																		ENSMUSG00000065812										ENSMUSG00000036854
																		ENSMUSG00000022667										ENSMUSG00000047473
																		ENSMUSG00000062082										ENSMUSG00000011427
																		ENSMUSG00000090176										ENSMUSG00000050855
																		ENSMUSG00000036172										ENSMUSG00000058402
																		ENSMUSG00000023826										ENSMUSG00000062040
																		ENSMUSG00000037253										ENSMUSG00000059975
																		ENSMUSG00000024515										ENSMUSG00000063623
																		ENSMUSG00000036941										ENSMUSG00000074221
																		ENSMUSG00000024556										ENSMUSG00000053985
																		ENSMUSG00000064036										ENSMUSG00000078770
																		ENSMUSG00000024558										ENSMUSG00000058447
																		ENSMUSG00000090263										ENSMUSG00000078768
																		ENSMUSG00000064527										ENSMUSG00000049421
																		ENSMUSG00000065922										ENSMUSG00000074220
																		ENSMUSG00000076941										ENSMUSG00000037029
																		ENSMUSG00000053861										ENSMUSG00000066647
																		ENSMUSG00000082401										ENSMUSG00000074218
																		ENSMUSG00000036223										ENSMUSG00000001794
																		ENSMUSG00000024560										ENSMUSG00000006095
																		ENSMUSG00000024561										ENSMUSG00000019738
																		ENSMUSG00000035394										ENSMUSG00000056028
																		ENSMUSG00000025885										ENSMUSG00000037020
																		ENSMUSG00000087882										ENSMUSG00000036882
																		ENSMUSG00000086333										ENSMUSG00000036733
																		ENSMUSG00000036880										ENSMUSG00000078762
																		ENSMUSG00000089235										ENSMUSG00000013928
																		ENSMUSG00000088689										ENSMUSG00000013921
																		ENSMUSG00000076229										ENSMUSG00000042831
																		ENSMUSG00000088144										ENSMUSG00000019737
																		ENSMUSG00000053846										ENSMUSG00000074211
																		ENSMUSG00000044065										ENSMUSG00000074210
																		ENSMUSG00000088652										ENSMUSG00000036957
																		ENSMUSG00000025019										ENSMUSG00000030579
																		ENSMUSG00000090673										ENSMUSG00000064109
																		ENSMUSG00000074873										ENSMUSG00000036931
																		ENSMUSG00000025020										ENSMUSG00000006651
																		ENSMUSG00000025154										ENSMUSG00000036826
																		ENSMUSG00000088220										ENSMUSG00000006307
																												ENSMUSG00000036892
																												ENSMUSG00000093571
																												ENSMUSG00000065659
																												ENSMUSG00000064982
																												ENSMUSG00000089139
																												ENSMUSG00000065385
																												ENSMUSG00000093495
																												ENSMUSG00000078758
																												ENSMUSG00000078759
																												ENSMUSG00000078383
																												ENSMUSG00000090339
																												ENSMUSG00000078381
																												ENSMUSG00000090311
																												ENSMUSG00000002635
																												ENSMUSG00000036427
																												ENSMUSG00000066571
																												ENSMUSG00000078380
																												ENSMUSG00000066568
																												ENSMUSG00000083085
																												ENSMUSG00000083942
																												ENSMUSG00000081962
																												ENSMUSG00000081768
																												ENSMUSG00000083434
																												ENSMUSG00000080947
																												ENSMUSG00000081491
																												ENSMUSG00000081161
																												ENSMUSG00000086526
																												ENSMUSG00000085105
																												ENSMUSG00000082684
																												ENSMUSG00000086184
																												ENSMUSG00000085124
																												ENSMUSG00000066586
																												ENSMUSG00000066584
																												ENSMUSG00000066583
																												ENSMUSG00000078752
																												ENSMUSG00000036459
																												ENSMUSG00000052997
																												ENSMUSG00000081863
																												ENSMUSG00000086631
																												ENSMUSG00000030499
																												ENSMUSG00000085923
																												ENSMUSG00000087127
																												ENSMUSG00000092033
																												ENSMUSG00000091647
																												ENSMUSG00000070509
																												ENSMUSG00000078671
																												ENSMUSG00000091890
																												ENSMUSG00000078670
																												ENSMUSG00000074067
																												ENSMUSG00000025789
																												ENSMUSG00000089391
																												ENSMUSG00000065729
																												ENSMUSG00000085161
																												ENSMUSG00000025790
																												ENSMUSG00000089573
																												ENSMUSG00000089522
																												ENSMUSG00000053025
																												ENSMUSG00000088683
																												ENSMUSG00000086403
																												ENSMUSG00000066406
																												ENSMUSG00000076961
																												ENSMUSG00000087896
																												ENSMUSG00000055652
																												ENSMUSG00000025754
																												ENSMUSG00000030774
																												ENSMUSG00000035582
																												ENSMUSG00000030761
																												ENSMUSG00000035547
																												ENSMUSG00000074006
																												ENSMUSG00000074004
																												ENSMUSG00000030760
																												ENSMUSG00000086325
																												ENSMUSG00000049580
																												ENSMUSG00000074003
																												ENSMUSG00000090958
																												ENSMUSG00000055446
																												ENSMUSG00000065803
																												ENSMUSG00000035401
																												ENSMUSG00000086477
																												ENSMUSG00000030753
																												ENSMUSG00000015957
																												ENSMUSG00000091496
																												ENSMUSG00000035354
																												ENSMUSG00000089501
																												ENSMUSG00000030747
																												ENSMUSG00000052396
																												ENSMUSG00000084975
																												ENSMUSG00000055407
																												ENSMUSG00000070436
																												ENSMUSG00000035314
																												ENSMUSG00000035298
																												ENSMUSG00000030744
																												ENSMUSG00000065822
																												ENSMUSG00000064966
																												ENSMUSG00000065311
																												ENSMUSG00000018909
																												ENSMUSG00000065571
																												ENSMUSG00000060814
																												ENSMUSG00000030737
																												ENSMUSG00000065698
																												ENSMUSG00000085095
																												ENSMUSG00000073998
																												ENSMUSG00000045333
																												ENSMUSG00000086208
																												ENSMUSG00000089301
																												ENSMUSG00000036810
																												ENSMUSG00000064758
																												ENSMUSG00000060470
																												ENSMUSG00000031786
																												ENSMUSG00000031787
																												ENSMUSG00000031788
																												ENSMUSG00000031789
																												ENSMUSG00000058253
																												ENSMUSG00000090206
																												ENSMUSG00000074140
																												ENSMUSG00000046556
																												ENSMUSG00000031792
																												ENSMUSG00000031790
																												ENSMUSG00000031796
																												ENSMUSG00000046707
																												ENSMUSG00000036598
																												ENSMUSG00000048400
																												ENSMUSG00000031669
																												ENSMUSG00000036564
																												ENSMUSG00000031671
																												ENSMUSG00000036550
																												ENSMUSG00000061104
																												ENSMUSG00000036534
																												ENSMUSG00000031672
																												ENSMUSG00000081436
																												ENSMUSG00000074136
																												ENSMUSG00000065089
																												ENSMUSG00000065211
																												ENSMUSG00000093084
																												ENSMUSG00000077272
																												ENSMUSG00000053206
																												ENSMUSG00000077938
																												ENSMUSG00000081111
																												ENSMUSG00000089539
																												ENSMUSG00000077125
																												ENSMUSG00000079433
																												ENSMUSG00000032265
																												ENSMUSG00000035941
																												ENSMUSG00000062358
																												ENSMUSG00000056031
																												ENSMUSG00000035274
																												ENSMUSG00000065274
																												ENSMUSG00000065706
																												ENSMUSG00000032415
																												ENSMUSG00000083731
																												ENSMUSG00000034973
																												ENSMUSG00000092099
																												ENSMUSG00000056131
																												ENSMUSG00000032417
																												ENSMUSG00000032418
																												ENSMUSG00000087466
																												ENSMUSG00000033491
																												ENSMUSG00000033419
																												ENSMUSG00000089373
																												ENSMUSG00000093074
																												ENSMUSG00000049721
																												ENSMUSG00000019368
																												ENSMUSG00000054986
																												ENSMUSG00000004748
																												ENSMUSG00000003585
																												ENSMUSG00000003581
																												ENSMUSG00000051427
																												ENSMUSG00000002129
																												ENSMUSG00000034412
																												ENSMUSG00000020424
																												ENSMUSG00000058755
																												ENSMUSG00000034394
																												ENSMUSG00000020419
																												ENSMUSG00000034354
																												ENSMUSG00000079010
																												ENSMUSG00000020412
																												ENSMUSG00000059534
																												ENSMUSG00000009076
																												ENSMUSG00000009075
																												ENSMUSG00000009073
																												ENSMUSG00000034285
																												ENSMUSG00000034274
																												ENSMUSG00000020396
																												ENSMUSG00000009090
																												ENSMUSG00000034201
																												ENSMUSG00000034209
																												ENSMUSG00000009079
																												ENSMUSG00000034175
																												ENSMUSG00000079004
																												ENSMUSG00000034164
																												ENSMUSG00000020393
																												ENSMUSG00000041961
																												ENSMUSG00000020484
																												ENSMUSG00000020482
																												ENSMUSG00000020481
																												ENSMUSG00000082816
																												ENSMUSG00000084170
																												ENSMUSG00000082364
																												ENSMUSG00000083838
																												ENSMUSG00000084012
																												ENSMUSG00000085559
																												ENSMUSG00000085512
																												ENSMUSG00000081974
																												ENSMUSG00000056288
																												ENSMUSG00000084381
																												ENSMUSG00000085232
																												ENSMUSG00000085189
																												ENSMUSG00000081021
																												ENSMUSG00000020432
																												ENSMUSG00000034493
																												ENSMUSG00000020430
																												ENSMUSG00000093080
																												ENSMUSG00000064632
																												ENSMUSG00000077304
																												ENSMUSG00000065627
																												ENSMUSG00000088634
																												ENSMUSG00000020477
																												ENSMUSG00000049680
																												ENSMUSG00000081691
																												ENSMUSG00000020476
																												ENSMUSG00000020475
																												ENSMUSG00000020474
																												ENSMUSG00000020473
																												ENSMUSG00000020471
																												ENSMUSG00000020469
																												ENSMUSG00000041798
																												ENSMUSG00000083844
																												ENSMUSG00000080904
																												ENSMUSG00000084819
																												ENSMUSG00000057610
																												ENSMUSG00000042063
																												ENSMUSG00000011171
																												ENSMUSG00000042050
																												ENSMUSG00000078984
																												ENSMUSG00000021171
																												ENSMUSG00000091262
																												ENSMUSG00000042029
																												ENSMUSG00000056553
																												ENSMUSG00000093765
																												ENSMUSG00000091100
																												ENSMUSG00000076713
																												ENSMUSG00000076714
																												ENSMUSG00000076715
																												ENSMUSG00000076716
[truncated: 308 more rows]
