# Supplementary material for: Genetic Variation in the Magnitude and Longevity of the IgG Subclass Response to a Diphtheria-Tetanus-Acellular Pertussis (DTaP) Vaccine in Mice
Source: Vaccines (Basel). 2019 Sep 20;7(4):124. doi: 10.3390/vaccines7040124 (PMC6963843; doi:10.3390/vaccines7040124)
Supplement: Supplementary file 1 [file vaccines-07-00124-s001.zip › Supplemental Data/longevityIgG3_genelist.xlsx]

## Sheet: longevityIgG3DT_genelist
Gene Name	Ensembl Gene ID	Chromosome	Start	End
Pkhd1	ENSMUSG00000043760	1	20047860	20608145
Il17a	ENSMUSG00000025929	1	20720986	20724577
Il17f	ENSMUSG00000041872	1	20767232	20774351
Mcm3	ENSMUSG00000041859	1	20793055	20810359
Paqr8	ENSMUSG00000025931	1	20880691	20929632
Efhc1	ENSMUSG00000041809	1	20941707	20980919
Tram2	ENSMUSG00000041779	1	20986377	21069310
Tmem14a	ENSMUSG00000025933	1	21208656	21220248
Gsta3	ENSMUSG00000025934	1	21230670	21255442
Gm4956	ENSMUSG00000025936	1	21275327	21288393
Khdc1a	ENSMUSG00000067750	1	21339722	21342281
Khdc1c	ENSMUSG00000041722	1	21358412	21360926
Khdc1b	ENSMUSG00000085079	1	21373637	21376465
Kcnq5	ENSMUSG00000028033	1	21388484	21952023
Rims1	ENSMUSG00000041670	1	22276332	22911673
Gm7094	ENSMUSG00000046847	1	21262484	21262990
Gm16329	ENSMUSG00000086194	1	21344086	21345197
Gm16327	ENSMUSG00000087453	1	21354884	21355111
Gm2709	ENSMUSG00000085507	1	21362751	21363845
Gm16533	ENSMUSG00000087427	1	21369636	21369863
Gm16328	ENSMUSG00000085679	1	21380987	21381182
Gm7658	ENSMUSG00000082935	1	21502014	21503137
6720483E21Rik	ENSMUSG00000087078	1	20878731	20880554
Gm16705	ENSMUSG00000085163	1	21949923	21952611
SNORA17	ENSMUSG00000088858	1	20832616	20832747
Mir206	ENSMUSG00000065559	1	20669091	20669163
Mir133b	ENSMUSG00000065480	1	20672850	20672968
SNORA17	ENSMUSG00000077314	1	20905491	20905621
Fmod	ENSMUSG00000041559	1	135933831	135944854
Btg2	ENSMUSG00000020423	1	135971747	135975697
Gm8618	ENSMUSG00000073559	1	136005915	136006417
Chit1	ENSMUSG00000026450	1	136007819	136048117
Chi3l1	ENSMUSG00000064246	1	136078753	136086758
Mybph	ENSMUSG00000042451	1	136090025	136097808
Adora1	ENSMUSG00000042429	1	136095800	136132008
Myog	ENSMUSG00000026459	1	136186581	136189124
Ppfia4	ENSMUSG00000026458	1	136193360	136229505
Tmem183a	ENSMUSG00000042305	1	136242674	136258576
4933406M09Rik	ENSMUSG00000050526	1	136282517	136287560
Cyb5r1	ENSMUSG00000026456	1	136302358	136308317
Adipor1	ENSMUSG00000026457	1	136311955	136329928
Klhl12	ENSMUSG00000026455	1	136352108	136387595
Gm11092	ENSMUSG00000079319	1	136373211	136373787
Rabif	ENSMUSG00000042229	1	136391225	136406451
4931440L10Rik	ENSMUSG00000046367	1	136437518	136446259
Kdm5b	ENSMUSG00000042207	1	136456748	136529454
Syt2	ENSMUSG00000026452	1	136605877	136649726
Ppp1r12b	ENSMUSG00000073557	1	136651235	136852519
Ube2t	ENSMUSG00000026429	1	136859142	136870739
Lgr6	ENSMUSG00000042793	1	136882925	137001853
Ptprv	ENSMUSG00000066885	1	137007746	137008883
Ptpn7	ENSMUSG00000031506	1	137029302	137041897
Arl8a	ENSMUSG00000026426	1	137043401	137052846
Gpr37l1	ENSMUSG00000026424	1	137056811	137064258
Elf3	ENSMUSG00000003051	1	137150151	137155049
Rnpep	ENSMUSG00000041926	1	137159289	137180661
Timm17a	ENSMUSG00000062580	1	137198109	137210355
Lmod1	ENSMUSG00000048096	1	137221384	137264642
Shisa4	ENSMUSG00000041889	1	137267634	137271814
Ipo9	ENSMUSG00000041879	1	137278889	137327076
Nav1	ENSMUSG00000009418	1	137331157	137481932
Gm4793	ENSMUSG00000054412	1	137481350	137496527
Nav1	ENSMUSG00000090399	1	137503024	137584682
Csrp1	ENSMUSG00000026421	1	137616638	137648809
Phlda3	ENSMUSG00000041801	1	137662696	137665713
Tnni1	ENSMUSG00000026418	1	137679642	137707566
Lad1	ENSMUSG00000041782	1	137715175	137729918
Tnnt2	ENSMUSG00000026414	1	137737452	137748837
Pkp1	ENSMUSG00000026413	1	137767972	137815784
Igfn1	ENSMUSG00000051985	1	137850155	137902919
Tmem9	ENSMUSG00000026411	1	137904796	137931607
Gm3834	ENSMUSG00000091246	1	136538831	136543097
Gm16606	ENSMUSG00000085392	1	137145138	137163020
Gm15454	ENSMUSG00000060342	1	136414607	136415258
Gm15445	ENSMUSG00000085311	1	137049540	137050383
Gm4204	ENSMUSG00000079139	1	137129022	137129801
5S_rRNA	ENSMUSG00000087721	1	137047243	137047343
U6	ENSMUSG00000087859	1	137250294	137250399
AC131591.1	ENSMUSG00000077846	1	136705852	136705945
U6	ENSMUSG00000084509	1	136177462	136177568
SNORA61	ENSMUSG00000077202	1	136401915	136402040
AC016814.1	ENSMUSG00000093515	1	137351180	137351260
Cdc73	ENSMUSG00000026361	1	145445927	145550023
Cdc73	ENSMUSG00000078284	1	145452292	145453738
B3galt2	ENSMUSG00000033849	1	145487794	145497536
Glrx2	ENSMUSG00000018196	1	145586159	145596806
Trove2	ENSMUSG00000018199	1	145597920	145624198
Uchl5	ENSMUSG00000018189	1	145624408	145654596
Rgs2	ENSMUSG00000026360	1	145846468	145851291
Rgs13	ENSMUSG00000051079	1	145985797	146024502
Rgs1	ENSMUSG00000026358	1	146091102	146096372
Gm6397	ENSMUSG00000089640	1	145530360	145531428
snoU109	ENSMUSG00000088323	1	145626058	145626192
Rgs7	ENSMUSG00000026527	1	176989867	177421261
Fh1	ENSMUSG00000026526	1	177530505	177555766
Kmo	ENSMUSG00000039783	1	177550512	177592247
Opn3	ENSMUSG00000026525	1	177592552	177622907
Chml	ENSMUSG00000078185	1	177616619	177618484
Wdr64	ENSMUSG00000026523	1	177628724	177745865
Exo1	ENSMUSG00000039748	1	177810909	177841527
Pld5	ENSMUSG00000055214	1	177892437	178205443
B020018G12Rik	ENSMUSG00000078184	1	177907908	177909245
Cep170	ENSMUSG00000057335	1	178663784	178744198
Sdccag8	ENSMUSG00000026504	1	178744791	178950568
Gm15423	ENSMUSG00000087082	1	178858130	178862842
U6	ENSMUSG00000065666	1	177834676	177834782
AC144905.1	ENSMUSG00000093132	1	178809965	178810044
U2	ENSMUSG00000077794	1	177730645	177730820
7SK	ENSMUSG00000084749	1	178724087	178724351
Mir350	ENSMUSG00000065573	1	178702456	178702554
U6	ENSMUSG00000087875	1	178630748	178630855
Akt3	ENSMUSG00000019699	1	178950204	179188334
Gm13210	ENSMUSG00000083252	2	7552703	7552975
Gm13211	ENSMUSG00000085070	2	7637778	7703035
Gm13254	ENSMUSG00000083269	2	8068839	8069492
Gm13255	ENSMUSG00000084374	2	8555564	8556110
Gm13217	ENSMUSG00000082953	2	8962744	8964111
1700061F12Rik	ENSMUSG00000085580	2	9111142	9119104
Gm13221	ENSMUSG00000083423	2	9191707	9192136
Gm13219	ENSMUSG00000079604	2	9274058	9369303
Gm13220	ENSMUSG00000081202	2	9497463	9497970
Gm13218	ENSMUSG00000079603	2	9512846	9519470
7SK	ENSMUSG00000088574	2	8393721	8394011
Gm11644	ENSMUSG00000083787	2	143175248	143175397
Fau-ps1	ENSMUSG00000082412	2	141664525	141665075
Rpl26-ps5	ENSMUSG00000081125	2	142396244	142396702
Gm14081	ENSMUSG00000083215	2	142402664	142403593
4930511F01Rik	ENSMUSG00000086504	2	142728701	142729308
Gm14083	ENSMUSG00000082903	2	142955456	142956075
Gm14082	ENSMUSG00000083047	2	142976566	142977366
Macrod2	ENSMUSG00000068205	2	140221045	142218702
Kif16b	ENSMUSG00000038844	2	142443210	142727267
Snrpb2	ENSMUSG00000008333	2	142888775	142898589
Otor	ENSMUSG00000027416	2	142904209	142907449
SNORA17	ENSMUSG00000088134	2	142612632	142612747
U6	ENSMUSG00000065347	2	141466226	141466332
7SK	ENSMUSG00000089318	2	142207724	142208027
Gm12360	ENSMUSG00000087115	2	143573319	143621701
C630020P19Rik	ENSMUSG00000086171	2	143361212	143373573
Gm11645	ENSMUSG00000080895	2	143332147	143332795
Bfsp1	ENSMUSG00000027420	2	143652264	143688909
Dstn	ENSMUSG00000015932	2	143741056	143769060
Gm11654	ENSMUSG00000082987	2	143681385	143681812
Gm11673	ENSMUSG00000081293	2	143703685	143704015
Gm11686	ENSMUSG00000080711	2	143706913	143707245
Pcsk2	ENSMUSG00000027419	2	143371892	143642021
Banf2	ENSMUSG00000037307	2	143858795	143899715
Snx5	ENSMUSG00000027423	2	144075859	144096642
Gm12357	ENSMUSG00000086384	2	143884874	143894542
Gm11687	ENSMUSG00000082480	2	143968224	143969109
Gm5535	ENSMUSG00000074758	2	143998886	144015026
4930444E06Rik	ENSMUSG00000085127	2	144068977	144070585
Gm11688	ENSMUSG00000082436	2	144086970	144087277
Rrbp1	ENSMUSG00000027422	2	143773131	143836999
SNORA70	ENSMUSG00000065725	2	144087325	144087462
Polr3f	ENSMUSG00000027427	2	144353454	144367731
Rbbp9	ENSMUSG00000027428	2	144368001	144376605
Sec23b	ENSMUSG00000027429	2	144381965	144416485
Gm561	ENSMUSG00000074754	2	144419790	144421102
Dtd1	ENSMUSG00000027430	2	144425633	144594494
8430406I07Rik	ENSMUSG00000027424	2	144096399	144106963
Ovol2	ENSMUSG00000037279	2	144130911	144157882
Csrp2bp	ENSMUSG00000027425	2	144194719	144233412
6330439K17Rik	ENSMUSG00000037259	2	144296293	144353150
1700108N11Rik	ENSMUSG00000084837	2	144157195	144158375
Gm11700	ENSMUSG00000081450	2	144181653	144182055
Gm11701	ENSMUSG00000082313	2	144189863	144191363
Zfp133-ps	ENSMUSG00000083674	2	144285016	144326003
Snord17	ENSMUSG00000077714	2	144091715	144091952
AL808119.1	ENSMUSG00000092833	2	144443879	144443969
4921509C19Rik	ENSMUSG00000061525	2	151296278	151301889
Nsfl1c	ENSMUSG00000027455	2	151319918	151337150
Fkbp1a	ENSMUSG00000032966	2	151368219	151387428
Sdcbp2	ENSMUSG00000027456	2	151398358	151415741
Snph	ENSMUSG00000027457	2	151416285	151458329
Rad21l	ENSMUSG00000074704	2	151471140	151494269
5430405G05Rik	ENSMUSG00000044364	2	151527744	151537893
Psmf1	ENSMUSG00000032869	2	151541548	151569922
Rspo4	ENSMUSG00000032852	2	151668663	151700404
Angpt4	ENSMUSG00000027460	2	151736943	151771073
Fam110a	ENSMUSG00000027459	2	151795134	151805955
Slc52a3	ENSMUSG00000027463	2	151822247	151834994
Scrt2	ENSMUSG00000060257	2	151907265	151921538
Srxn1	ENSMUSG00000032802	2	151931252	151937112
Tcf15	ENSMUSG00000068079	2	151969297	151974833
Csnk2a1	ENSMUSG00000074698	2	152052575	152107588
Tbc1d20	ENSMUSG00000027465	2	152119564	152139732
Rbck1	ENSMUSG00000027466	2	152142070	152158389
Trib3	ENSMUSG00000032715	2	152163158	152169768
Nrsn2	ENSMUSG00000059361	2	152194491	152202374
Sox12	ENSMUSG00000051817	2	152219347	152223782
Zcchc3	ENSMUSG00000074682	2	152237692	152240780
6820408C15Rik	ENSMUSG00000032680	2	152241323	152270066
Defb23	ENSMUSG00000074681	2	152284791	152290356
Defb20	ENSMUSG00000049560	2	152302799	152305670
Defb22	ENSMUSG00000027468	2	152311399	152315874
Defb26	ENSMUSG00000074680	2	152333534	152337428
Defb28	ENSMUSG00000074679	2	152343991	152347183
Defb29	ENSMUSG00000044249	2	152364450	152365834
Gm17416	ENSMUSG00000090485	2	152395074	152395274
Defb21	ENSMUSG00000056544	2	152398480	152400680
Defb19	ENSMUSG00000050645	2	152401822	152406048
Defb45	ENSMUSG00000062124	2	152418927	152425135
Defb36	ENSMUSG00000044863	2	152430063	152438465
Defb25	ENSMUSG00000074678	2	152448092	152448789
Rem1	ENSMUSG00000000359	2	152452687	152460934
H13	ENSMUSG00000019188	2	152495197	152534406
Mcts2	ENSMUSG00000042814	2	152512884	152513676
Id1	ENSMUSG00000042745	2	152561987	152563146
Cox4i2	ENSMUSG00000009876	2	152579909	152590773
Bcl2l1	ENSMUSG00000007659	2	152593052	152657464
Tpx2	ENSMUSG00000027469	2	152673700	152721057
Mylk2	ENSMUSG00000027470	2	152737088	152748804
Foxs1	ENSMUSG00000074676	2	152757634	152758944
Dusp15	ENSMUSG00000042662	2	152766731	152777434
Ttll9	ENSMUSG00000074673	2	152788221	152834218
Pdrg1	ENSMUSG00000027472	2	152834626	152841163
Xkr7	ENSMUSG00000042631	2	152857588	152881511
BC020535	ENSMUSG00000027474	2	152891691	152907471
Hck	ENSMUSG00000003283	2	152934204	152977177
Tm9sf4	ENSMUSG00000068040	2	152987039	153036202
Tspyl3	ENSMUSG00000074671	2	153048116	153051177
Plagl2	ENSMUSG00000051413	2	153053495	153067162
Pofut1	ENSMUSG00000046020	2	153067269	153095983
Kif3b	ENSMUSG00000027475	2	153117149	153159126
Asxl1	ENSMUSG00000042548	2	153171581	153229743
2500004C02Rik	ENSMUSG00000073236	2	153166893	153171809
AA387200	ENSMUSG00000085946	2	151900591	151902544
Rps15a-ps7	ENSMUSG00000081087	2	152011027	152011418
Gm17559	ENSMUSG00000090656	2	152520469	152522428
Gm14164	ENSMUSG00000068062	2	152171405	152201060
Gm14165	ENSMUSG00000081434	2	152179351	152180302
Gm14158	ENSMUSG00000083230	2	152283507	152283814
Gm14156	ENSMUSG00000082689	2	152293130	152293612
Gm14161	ENSMUSG00000084935	2	152375450	152379668
Gm14163	ENSMUSG00000089684	2	152434910	152435126
1700030C14Rik	ENSMUSG00000087148	2	152478619	152480066
Gm14162	ENSMUSG00000082318	2	152571419	152572043
Gm14199	ENSMUSG00000089898	2	152815753	152817367
Gm14152	ENSMUSG00000087495	2	151206386	151258138
Gm14150	ENSMUSG00000082809	2	151284692	151286045
Gm14146	ENSMUSG00000086659	2	151287781	151295349
Gm14167	ENSMUSG00000087433	2	151366467	151368084
BC052486	ENSMUSG00000087035	2	151505097	151512075
Gm14159	ENSMUSG00000081777	2	151525212	151525662
4930556L07Rik	ENSMUSG00000086800	2	151573314	151575714
Gm14153	ENSMUSG00000083088	2	151622843	151623981
Gm14155	ENSMUSG00000087033	2	151654803	151657844
Gm14157	ENSMUSG00000086620	2	151691051	151692696
Gm14154	ENSMUSG00000087004	2	151773009	151776377
AL731857.1	ENSMUSG00000093306	2	152598524	152598625
AL833801.1	ENSMUSG00000093746	2	152690803	152690862
Mir1953	ENSMUSG00000088491	2	151793265	151793353
U6	ENSMUSG00000089499	2	152980749	152980851
SNORA17	ENSMUSG00000087890	2	151261530	151261665
8430427H17Rik	ENSMUSG00000061411	2	153233198	153355707
Gm14472	ENSMUSG00000082283	2	153239585	153239866
4930404H24Rik	ENSMUSG00000079001	2	153318526	153319577
Commd7	ENSMUSG00000056941	2	153442669	153458517
Dnmt3b	ENSMUSG00000027478	2	153475186	153513466
Mapre1	ENSMUSG00000027479	2	153567010	153599046
7530422B04Rik	ENSMUSG00000079000	2	153474426	153476022
Gm14490	ENSMUSG00000082079	2	153522388	153555641
Efcab8	ENSMUSG00000044083	2	153606615	153670488
Sun5	ENSMUSG00000027480	2	153681924	153696820
Gm14494	ENSMUSG00000083097	2	153651789	153652570
Bpifb2	ENSMUSG00000027481	2	153700781	153721006
Bpifb6	ENSMUSG00000068009	2	153726124	153738531
Bpifb3	ENSMUSG00000068008	2	153743966	153758732
Bpifb4	ENSMUSG00000074665	2	153763948	153789837
Bpifa6	ENSMUSG00000078998	2	153800681	153826231
Bpifa2	ENSMUSG00000042459	2	153834001	153841815
Gm14497	ENSMUSG00000081013	2	153912571	153913150
Dlgap4	ENSMUSG00000061689	2	156439441	156590099
Myl9	ENSMUSG00000067818	2	156601156	156607394
Tgif2	ENSMUSG00000062175	2	156665813	156681306
4930518I15Rik	ENSMUSG00000074629	2	156682352	156683682
1110008F13Rik	ENSMUSG00000027637	2	156688864	156699299
Sla2	ENSMUSG00000027636	2	156698193	156712928
Ndrg3	ENSMUSG00000027634	2	156753081	156817792
Dsn1	ENSMUSG00000027635	2	156821001	156832890
9830001H06Rik	ENSMUSG00000055485	2	156841535	156904990
Gm1332	ENSMUSG00000074628	2	156912791	156922218
Samhd1	ENSMUSG00000027639	2	156923265	156961001
Rbl1	ENSMUSG00000027641	2	156971629	157030270
4922505G16Rik	ENSMUSG00000074627	2	157034286	157105285
Rpn2	ENSMUSG00000027642	2	157104753	157152055
Ghrh	ENSMUSG00000027643	2	157155233	157173242
Manbal	ENSMUSG00000063019	2	157193330	157222499
Src	ENSMUSG00000027646	2	157244180	157297598
Blcap	ENSMUSG00000067787	2	157382098	157397010
Nnat	ENSMUSG00000067786	2	157385814	157388258
Ctnnbl1	ENSMUSG00000027649	2	157563137	157717350
Vstm2l	ENSMUSG00000037843	2	157740389	157770455
Tti1	ENSMUSG00000027650	2	157807539	157854169
Rprd1b	ENSMUSG00000027651	2	157854233	157958033
Tgm2	ENSMUSG00000037820	2	157942138	157972172
D630003M21Rik	ENSMUSG00000037813	2	158008269	158054958
1700060C20Rik	ENSMUSG00000078957	2	158017745	158021478
Bpi	ENSMUSG00000052922	2	158083830	158110267
Lbp	ENSMUSG00000016024	2	158132229	158158588
Snhg11	ENSMUSG00000044349	2	158201374	158211881
Ralgapb	ENSMUSG00000027652	2	158235584	158324989
Adig	ENSMUSG00000044405	2	158328348	158333934
Arhgap40	ENSMUSG00000074625	2	158338532	158376498
Slc32a1	ENSMUSG00000037771	2	158436494	158441484
Actr5	ENSMUSG00000037761	2	158450624	158464947
Ppp1r16b	ENSMUSG00000037754	2	158491134	158592070
4930405A21Rik	ENSMUSG00000086638	2	156540276	156546645
Gm14231	ENSMUSG00000082196	2	156615548	156616139
Gm14230	ENSMUSG00000087179	2	156658785	156665628
5430405H02Rik	ENSMUSG00000085741	2	156678166	156688681
Gm14278	ENSMUSG00000080880	2	156714590	156741119
Gm14248	ENSMUSG00000083831	2	156715200	156715743
Gm14247	ENSMUSG00000081616	2	156718618	156718854
Gm14276	ENSMUSG00000082163	2	156819971	156820627
Gm14277	ENSMUSG00000084113	2	156994556	156994915
Gm14279	ENSMUSG00000081740	2	157347432	157347764
Gm14287	ENSMUSG00000082329	2	157354605	157354721
Gm14286	ENSMUSG00000087445	2	157370002	157371205
2410019O14Rik	ENSMUSG00000087547	2	157421319	157423056
Gm14176	ENSMUSG00000062846	2	157727272	157727748
Gm20412	ENSMUSG00000092283	2	157942890	157943641
9430008C03Rik	ENSMUSG00000085385	2	158181043	158187316
Gm14201	ENSMUSG00000083168	2	158228463	158228751
Gm14202	ENSMUSG00000083715	2	158232244	158232554
Gm14200	ENSMUSG00000081800	2	158293685	158294133
Gm14204	ENSMUSG00000086496	2	158421208	158436459
Gm14205	ENSMUSG00000087563	2	158436646	158437556
AL672259.1	ENSMUSG00000077990	2	157388097	157388183
Mir3474	ENSMUSG00000093120	2	158464319	158464376
Y_RNA	ENSMUSG00000084644	2	158313338	158313423
SNORA71	ENSMUSG00000064995	2	158184096	158184208
SNORA71	ENSMUSG00000064405	2	158185534	158185665
SNORA71	ENSMUSG00000065362	2	158182160	158182290
SNORA71	ENSMUSG00000065840	2	158203958	158204090
SNORA71	ENSMUSG00000064585	2	158205270	158205402
Mir5111	ENSMUSG00000092691	2	156959642	156959708
SNORA17	ENSMUSG00000077290	2	157539404	157539537
U6	ENSMUSG00000084417	2	157551736	157551834
Fam83d	ENSMUSG00000027654	2	158593829	158612373
Dhx35	ENSMUSG00000027655	2	158620543	158683950
AL663077.1	ENSMUSG00000093040	2	158565874	158565999
Gm14219	ENSMUSG00000083913	2	159281906	159282193
Gm11445	ENSMUSG00000083451	2	159603412	159603943
Gm11446	ENSMUSG00000081215	2	159684161	159685026
Gm14223	ENSMUSG00000086558	2	159737509	159773112
4933416E03Rik	ENSMUSG00000085198	2	159773077	159807024
Gm14220	ENSMUSG00000083329	2	159804010	159804458
SNORA17	ENSMUSG00000077188	2	158965097	158965228
4930591A17Rik	ENSMUSG00000039138	2	179149641	179151587
Cdh4	ENSMUSG00000000305	2	179177136	179634078
Gm10711	ENSMUSG00000074518	2	179628614	179629398
Taf4a	ENSMUSG00000039117	2	179646851	179711351
Lsm14b	ENSMUSG00000039108	2	179759692	179770170
Psma7	ENSMUSG00000027566	2	179771078	179777138
Ss18l1	ENSMUSG00000039086	2	179777214	179804906
Gtpbp5	ENSMUSG00000039069	2	179805293	179820607
Hrh3	ENSMUSG00000039059	2	179834170	179839193
Osbpl2	ENSMUSG00000039050	2	179854011	179897385
Adrm1	ENSMUSG00000039041	2	179906190	179910991
Lama5	ENSMUSG00000015647	2	179911078	179960564
Rps21	ENSMUSG00000039001	2	179992082	179993150
Cables2	ENSMUSG00000038990	2	179993245	180008201
BC066135	ENSMUSG00000038980	2	180012351	180024584
Gata5	ENSMUSG00000015627	2	180059838	180069404
Gm14318	ENSMUSG00000056061	2	180067562	180075437
Slco4a1	ENSMUSG00000038963	2	180190950	180209572
Ntsr1	ENSMUSG00000027568	2	180234681	180279685
Gm14314	ENSMUSG00000082215	2	178754824	178755838
Gm14292	ENSMUSG00000061897	2	178912130	178912585
Gm14293	ENSMUSG00000081481	2	178975195	178975771
Gm14294	ENSMUSG00000081882	2	179098998	179099748
Gm14300	ENSMUSG00000083410	2	179347327	179348272
4921531C22Rik	ENSMUSG00000085704	2	179710698	179713718
Gm14299	ENSMUSG00000082850	2	179727893	179728289
Gm17180	ENSMUSG00000090589	2	179834618	179836207
B230312C02Rik	ENSMUSG00000084843	2	180105196	180120590
Mir3091	ENSMUSG00000092827	2	179992241	179992316
AL663067.1	ENSMUSG00000080507	2	179725502	179725587
Mir133a-2	ENSMUSG00000065460	2	180133084	180133187
Mir1a-1	ENSMUSG00000070144	2	180123753	180123829
1600027N09Rik	ENSMUSG00000027569	2	180316009	180321009
Ogfr	ENSMUSG00000049401	2	180323950	180330541
Col9a3	ENSMUSG00000027570	2	180332495	180356894
Tcfl5	ENSMUSG00000038932	2	180356661	180377413
Dido1	ENSMUSG00000038914	2	180392669	180444704
U6	ENSMUSG00000064422	2	180432768	180432874
2310003C23Rik	ENSMUSG00000027573	2	180444822	180453438
Slc17a9	ENSMUSG00000023393	2	180459968	180476985
Bhlhe23	ENSMUSG00000045493	2	180509086	180511605
Ythdf1	ENSMUSG00000038848	2	180639082	180655654
Birc7	ENSMUSG00000038840	2	180663728	180668715
Nkain4	ENSMUSG00000027574	2	180669477	180689404
Arfgap1	ENSMUSG00000027575	2	180701930	180717231
9230112E08Rik	ENSMUSG00000070461	2	180718937	180720296
Col20a1	ENSMUSG00000016356	2	180721240	180752245
Chrna4	ENSMUSG00000027577	2	180753085	180778251
Kcnq2	ENSMUSG00000016346	2	180810284	180869996
Eef1a2	ENSMUSG00000016349	2	180882358	180891719
Ppdpf	ENSMUSG00000016344	2	180921952	180923476
Ptk6	ENSMUSG00000038751	2	180928426	180937494
Srms	ENSMUSG00000027579	2	180940267	180947890
BC051628	ENSMUSG00000047841	2	180954718	180957559
BC006779	ENSMUSG00000027580	2	180962320	180976732
Gmeb2	ENSMUSG00000038705	2	180986154	181022740
Stmn3	ENSMUSG00000027581	2	181041164	181049205
Rtel1	ENSMUSG00000038685	2	181054444	181091321
Arfrp1	ENSMUSG00000038671	2	181092395	181100109
Zgpat	ENSMUSG00000027582	2	181099633	181118333
Lime1	ENSMUSG00000090077	2	181114783	181118333
Zbtb46	ENSMUSG00000027583	2	181122467	181194131
Gm14343	ENSMUSG00000087550	2	180500919	180510108
Gm14340	ENSMUSG00000074507	2	180553048	180559335
Gm14342	ENSMUSG00000086166	2	180564195	180624365
Gm14344	ENSMUSG00000085428	2	180571186	180583619
Gm14339	ENSMUSG00000085728	2	180582357	180583751
Gm14341	ENSMUSG00000087293	2	180689169	180701517
Gm14398	ENSMUSG00000083993	2	180951432	180952504
Gm14447	ENSMUSG00000084033	2	181026853	181027640
Slc2a4rg-ps	ENSMUSG00000085028	2	181118955	181122291
U6	ENSMUSG00000089612	2	181160640	181160742
Mir124a-3	ENSMUSG00000065454	2	180628736	180628822
HAR1F	ENSMUSG00000088334	2	180572532	180572663
U6	ENSMUSG00000084696	2	180918217	180918320
Abhd16b	ENSMUSG00000055882	2	181227911	181229685
Tpd52l2	ENSMUSG00000000827	2	181231847	181252671
Dnajc5	ENSMUSG00000000826	2	181255190	181289838
Uckl1	ENSMUSG00000089917	2	181303854	181319597
Znf512b	ENSMUSG00000000823	2	181316808	181327508
Prpf6	ENSMUSG00000002455	2	181326573	181390365
Samd10	ENSMUSG00000038605	2	181329923	181333917
Gm16119	ENSMUSG00000010492	2	181313185	181319875
U1	ENSMUSG00000088378	2	181247255	181247417
Sox18	ENSMUSG00000046470	2	181404541	181406345
Tcea2	ENSMUSG00000059540	2	181415015	181422776
U6	ENSMUSG00000077518	2	181397011	181397117
Rgs19	ENSMUSG00000002458	2	181423124	181428682
4930526D03Rik	ENSMUSG00000045794	2	181431498	181433147
Oprl1	ENSMUSG00000027584	2	181449721	181455690
Myt1	ENSMUSG00000010505	2	181498037	181562502
Pcmtd2	ENSMUSG00000027589	2	181572559	181592166
Polr3k	ENSMUSG00000038628	2	181599042	181605535
Gm14496	ENSMUSG00000053277	2	181725841	181731135
Gm14489	ENSMUSG00000082786	2	181458747	181459647
Gm5466	ENSMUSG00000083397	2	181631528	181633417
Gm16337	ENSMUSG00000089794	3	9757607	9786142
Chmp4c	ENSMUSG00000027536	3	10366907	10391005
C030034L19Rik	ENSMUSG00000085362	3	9403064	9437233
Snx16	ENSMUSG00000027534	3	10417819	10440124
Gm8910	ENSMUSG00000069106	3	11013518	11015193
Zfp704	ENSMUSG00000040209	3	9427011	9610085
Pag1	ENSMUSG00000027508	3	9687479	9833679
Fabp5	ENSMUSG00000027533	3	10012548	10016607
Gm9833	ENSMUSG00000049230	3	10088173	10092564
Pmp2	ENSMUSG00000052468	3	10179851	10183885
Fabp9	ENSMUSG00000027528	3	10193626	10197222
Fabp4	ENSMUSG00000062515	3	10204347	10208576
Fabp12	ENSMUSG00000027530	3	10244209	10301183
Impa1	ENSMUSG00000027531	3	10313540	10331439
Slc10a5	ENSMUSG00000058921	3	10331734	10335656
Zfand1	ENSMUSG00000039795	3	10339953	10351317
5S_rRNA	ENSMUSG00000088004	3	9829620	9829728
AC127294.1	ENSMUSG00000093022	3	11154337	11154437
SNORA17	ENSMUSG00000087858	3	10975469	10975586
Gm8935	ENSMUSG00000045699	3	12855996	12856403
Gm5844	ENSMUSG00000082896	3	17908806	17910996
Gm6369	ENSMUSG00000040217	3	18433861	18434289
Gm16093	ENSMUSG00000087108	3	19127780	19140987
Gm6141	ENSMUSG00000084339	3	19484791	19485538
Dnajc5b	ENSMUSG00000027606	3	19408595	19510862
Gm10742	ENSMUSG00000074674	3	17683514	17686898
Cypt12	ENSMUSG00000027564	3	17848444	17848952
Bhlhe22	ENSMUSG00000025128	3	17954325	17957509
Cyp7b1	ENSMUSG00000039519	3	17971950	18143338
Armc1	ENSMUSG00000027599	3	19032146	19063065
Mtfr1	ENSMUSG00000027601	3	19087327	19120817
Pde7a	ENSMUSG00000069094	3	19123108	19211322
1700064H15Rik	ENSMUSG00000082766	3	19510368	19528677
Trim55	ENSMUSG00000060913	3	19544460	19591599
Crh	ENSMUSG00000049796	3	19593401	19595396
U1	ENSMUSG00000065175	3	19460253	19460416
Mir124a-2	ENSMUSG00000093073	3	17695662	17695770
U6atac	ENSMUSG00000087893	3	17703621	17703747
U1	ENSMUSG00000064594	3	18077462	18077625
7SK	ENSMUSG00000089149	3	19230773	19231084
Gyg	ENSMUSG00000019528	3	20021970	20055216
Hps3	ENSMUSG00000027615	3	19895945	19935315
Hps3	ENSMUSG00000078774	3	19916917	19924958
Hltf	ENSMUSG00000002428	3	19957811	20018376
4632415L05Rik	ENSMUSG00000048106	3	19794886	19795962
Cp	ENSMUSG00000003617	3	19857054	19909145
Cpa3	ENSMUSG00000001865	3	20115516	20142080
Cpb1	ENSMUSG00000011463	3	20148163	20174655
Agtr1b	ENSMUSG00000054988	3	20213395	20266099
Sox2ot	ENSMUSG00000090828	3	34003360	34581541
Gm5708	ENSMUSG00000092249	3	34082229	34083114
Gm20446	ENSMUSG00000092196	3	34197440	34221211
Gm20514	ENSMUSG00000092355	3	34223741	34250637
Gm20515	ENSMUSG00000092242	3	34326295	34334019
Gm15952	ENSMUSG00000085655	3	35831967	35841639
A330050B17Rik	ENSMUSG00000086392	3	35898755	35924028
Dcun1d1	ENSMUSG00000027708	3	35791900	35836367
Dnajc19	ENSMUSG00000027679	3	33954942	33980243
Sox2	ENSMUSG00000074637	3	34548927	34551383
Atp11b	ENSMUSG00000037400	3	35653056	35755196
Mccc1	ENSMUSG00000027709	3	35858234	35899600
Ccdc144b	ENSMUSG00000047696	3	35906169	35952469
Acad9	ENSMUSG00000027710	3	35964901	35993866
Mir1897	ENSMUSG00000084530	3	34537386	34537464
AC158547.1	ENSMUSG00000093499	3	35224536	35224627
U6	ENSMUSG00000064834	3	35634295	35634399
AC137708.1	ENSMUSG00000093307	3	34489443	34489530
D3Ertd254e	ENSMUSG00000033883	3	36058444	36065142
Gm11548	ENSMUSG00000085320	3	36398726	36405731
Gm11549	ENSMUSG00000085007	3	36413979	36420735
Gm11550	ENSMUSG00000083388	3	36438305	36439003
Gm12377	ENSMUSG00000082548	3	36593724	36593975
Gm12376	ENSMUSG00000084027	3	36723274	36723880
Gm12531	ENSMUSG00000086090	3	36951137	36958957
Gm12582	ENSMUSG00000081705	3	36976577	36977273
Gm12583	ENSMUSG00000082878	3	37007096	37007948
Gm12584	ENSMUSG00000083857	3	37015656	37016760
Gm12532	ENSMUSG00000084754	3	37081807	37087515
Gm13621	ENSMUSG00000081634	3	37098901	37099901
Gm12533	ENSMUSG00000083575	3	37114762	37114899
Gm12534	ENSMUSG00000086517	3	37130255	37131391
Adad1	ENSMUSG00000027719	3	36962449	37020846
Il2	ENSMUSG00000027720	3	37019445	37024881
Il21	ENSMUSG00000027718	3	37121681	37131540
Qrfpr	ENSMUSG00000058400	3	36078346	36121197
Anxa5	ENSMUSG00000027712	3	36347847	36374765
1810062G17Rik	ENSMUSG00000027713	3	36375057	36380898
Exosc9	ENSMUSG00000027714	3	36451528	36464651
Ccna2	ENSMUSG00000027715	3	36463788	36471072
Bbs7	ENSMUSG00000037325	3	36472064	36512399
Trpc3	ENSMUSG00000027716	3	36519404	36589089
4932438A13Rik	ENSMUSG00000037270	3	36762028	36951955
AL691478.1	ENSMUSG00000076974	3	37155706	37155815
Gm12540	ENSMUSG00000083353	3	37225994	37226312
Gm12541	ENSMUSG00000054779	3	37234254	37248662
Cetn4	ENSMUSG00000045031	3	37206671	37211630
Fgf2	ENSMUSG00000037225	3	37211441	37304299
Bbs12	ENSMUSG00000051444	3	37211476	37220375
Gm12563	ENSMUSG00000083696	3	37380414	37380515
Gm12564	ENSMUSG00000080723	3	37455105	37455425
Gm12565	ENSMUSG00000081093	3	37498346	37498994
4930594O21Rik	ENSMUSG00000085677	3	37512835	37514198
Gm15450	ENSMUSG00000063001	3	37613662	37614100
Gm7799	ENSMUSG00000087457	3	37858534	37859009
C230034O21Rik	ENSMUSG00000086181	3	38773492	38787181
Spry1	ENSMUSG00000037211	3	37538869	37543520
Rpl21-ps10	ENSMUSG00000064315	3	38006330	38006877
Ankrd50	ENSMUSG00000044864	3	38348183	38383766
Fat4	ENSMUSG00000046743	3	38785862	38910907
Gm5148	ENSMUSG00000058174	3	37613112	37623412
Nudt6	ENSMUSG00000050174	3	37303832	37319133
Spata5	ENSMUSG00000027722	3	37318818	37478018
AC162799.1	ENSMUSG00000092986	3	38166760	38167006
SNORA17	ENSMUSG00000077728	3	37894027	37894157
SNORA17	ENSMUSG00000089123	3	37701466	37701574
AC114901.1	ENSMUSG00000076385	3	38457031	38457136
Gm10728	ENSMUSG00000074602	3	51710909	51712738
Gm20402	ENSMUSG00000092405	3	52072357	52073357
Gm16206	ENSMUSG00000085174	3	53256541	53261719
2810046L04Rik	ENSMUSG00000049504	3	53267588	53285677
Stoml3	ENSMUSG00000027744	3	53292649	53312424
Frem2	ENSMUSG00000037016	3	53317861	53461277
Maml3	ENSMUSG00000061143	3	51491533	51908813
Foxo1	ENSMUSG00000044167	3	52072259	52154031
Gm10293	ENSMUSG00000070490	3	52416707	52417938
Cog6	ENSMUSG00000027742	3	52786045	52821145
Lhfp	ENSMUSG00000048332	3	52845450	53065601
Nhlrc3	ENSMUSG00000042997	3	53252510	53267245
SNORA17	ENSMUSG00000087936	3	53315924	53316048
n-R5s196	ENSMUSG00000065070	3	51632834	51632950
U6	ENSMUSG00000065926	3	52526571	52526677
Gm10985	ENSMUSG00000078742	3	53649008	53649200
Ufm1	ENSMUSG00000074598	3	53657301	53658908
Ufm1	ENSMUSG00000027746	3	53659134	53667752
U6	ENSMUSG00000088653	3	53647329	53647431
Mbnl1	ENSMUSG00000027763	3	60277032	60433670
Gm8325	ENSMUSG00000027694	3	60680934	60682761
P2ry1	ENSMUSG00000027765	3	60806717	60812901
B430305J03Rik	ENSMUSG00000053706	3	61166172	61169873
Rap2b	ENSMUSG00000036894	3	61168429	61172625
Arhgef26	ENSMUSG00000036885	3	62142266	62266143
U7	ENSMUSG00000089032	3	61207710	61207757
Dhx36	ENSMUSG00000027770	3	62273961	62310926
Gpr149	ENSMUSG00000043441	3	62332999	62409062
Mme	ENSMUSG00000027820	3	63099794	63186153
SCARNA14	ENSMUSG00000089175	3	62956139	62956280
U6	ENSMUSG00000088957	3	63292915	63293020
Vmn2r1	ENSMUSG00000027824	3	63885564	63909380
Vmn2r2	ENSMUSG00000043897	3	63920354	63944465
Vmn2r3	ENSMUSG00000091572	3	64062883	64091417
Vmn2r4	ENSMUSG00000092049	3	64192543	64219218
Vmn2r5	ENSMUSG00000068999	3	64294743	64313657
Vmn2r6	ENSMUSG00000090581	3	64341483	64369220
Gm16162	ENSMUSG00000090131	3	63629716	63630366
Gm16129	ENSMUSG00000085290	3	63647038	63647991
Gm9479	ENSMUSG00000090303	3	63856953	63859532
Gm5139	ENSMUSG00000093447	3	63967312	63967560
Gm18294	ENSMUSG00000093416	3	63999496	64017599
Vmn2r-ps4	ENSMUSG00000093503	3	64132582	64136775
Vmn2r-ps5	ENSMUSG00000091967	3	64143487	64161646
Vmn2r-ps6	ENSMUSG00000093395	3	64240805	64242209
Vmn2r-ps7	ENSMUSG00000093546	3	64246522	64247897
RP23-445D13.2	ENSMUSG00000093671	3	64251889	64264017
Vmn2r-ps8	ENSMUSG00000093375	3	64280940	64283241
Gm17548	ENSMUSG00000091540	3	63767555	63772581
Plch1	ENSMUSG00000036834	3	63500156	63703394
E130311K13Rik	ENSMUSG00000048581	3	63718606	63733394
Gmps	ENSMUSG00000027823	3	63780028	63826501
Slc33a1	ENSMUSG00000027822	3	63737429	63768690
U6	ENSMUSG00000088360	3	63574134	63574231
snoU13	ENSMUSG00000089457	3	63711633	63711734
snoU109	ENSMUSG00000088735	3	64122329	64122486
U6	ENSMUSG00000089039	3	63913557	63913659
Vmn2r-ps9	ENSMUSG00000093699	3	64395437	64396818
RP23-445D13.4	ENSMUSG00000093484	3	64400835	64409695
Vmn2r-ps10	ENSMUSG00000093646	3	64425616	64427917
Vmn2r-ps10	ENSMUSG00000090261	3	64427143	64427917
Vmn2r-ps11	ENSMUSG00000093434	3	64436496	64648665
AC110575.2	ENSMUSG00000093524	3	64436785	64648665
Vmn2r7	ENSMUSG00000062200	3	64494582	64648687
Kcnab1	ENSMUSG00000027827	3	64913306	65182145
Ssr3	ENSMUSG00000027828	3	65183577	65196545
Vmn2r-ps12	ENSMUSG00000093474	3	64548671	64549567
Vmn2r-ps12	ENSMUSG00000090010	3	64548671	64549539
RP24-549B23.7	ENSMUSG00000093414	3	64574208	64574440
Vmn2r-ps13	ENSMUSG00000093767	3	64703079	64703684
A730090N16Rik	ENSMUSG00000090120	3	65128698	65153351
SNORA17	ENSMUSG00000088824	3	64698393	64698518
Schip1	ENSMUSG00000027777	3	67868864	68430404
Il12a	ENSMUSG00000027776	3	68494566	68502469
Gm17641	ENSMUSG00000091272	3	68671839	68674188
1110032F04Rik	ENSMUSG00000046999	3	68673508	68676085
Ift80	ENSMUSG00000027778	3	68696421	68808492
Smc4	ENSMUSG00000034349	3	68808660	68838545
Trim59	ENSMUSG00000034317	3	68839210	68848677
Kpna4	ENSMUSG00000027782	3	68871071	68931035
Ppm1l	ENSMUSG00000027784	3	69120783	69364724
B3galnt1	ENSMUSG00000043300	3	69378108	69402783
Rpl32-ps	ENSMUSG00000068969	3	69520908	69521315
Nmd3	ENSMUSG00000027787	3	69525907	69552964
1110032A04Rik	ENSMUSG00000043461	3	69623460	69663818
Otol1	ENSMUSG00000027788	3	69811535	69832630
Gm10040	ENSMUSG00000058360	3	68537059	68541999
RP24-399B3.3	ENSMUSG00000093384	3	68704093	68704371
RP24-399B3.4	ENSMUSG00000093730	3	68705752	68706066
Gm18588	ENSMUSG00000093402	3	68706189	68706680
RP24-399B3.1	ENSMUSG00000093505	3	68707742	68708074
Arl14	ENSMUSG00000027783	3	69026341	69027538
Gm17214	ENSMUSG00000091315	3	69123967	69124507
Gm17212	ENSMUSG00000090941	3	69139424	69139682
Gm17213	ENSMUSG00000090743	3	69234931	69236290
Mir16-2	ENSMUSG00000065606	3	68813824	68813918
U2	ENSMUSG00000084617	3	68351442	68351630
SNORA17	ENSMUSG00000089507	3	70032669	70032796
SNORA17	ENSMUSG00000077366	3	69766237	69766367
5S_rRNA	ENSMUSG00000087848	3	69489389	69489502
snoU90	ENSMUSG00000089417	3	68889027	68889369
Mir15b	ENSMUSG00000065580	3	68813678	68813775
Gm10780	ENSMUSG00000074877	3	70493014	70493302
Gm6634	ENSMUSG00000086538	3	70576301	70611213
Sis	ENSMUSG00000027790	3	72692479	72771785
U2	ENSMUSG00000084752	3	72541753	72541903
Slitrk3	ENSMUSG00000048304	3	72852048	72860865
7SK	ENSMUSG00000088794	3	73011625	73011923
AC131665.1	ENSMUSG00000077050	3	72950771	72950880
Bche	ENSMUSG00000027792	3	73439730	73512337
Zbbx	ENSMUSG00000034151	3	74841829	74968956
Serpini2	ENSMUSG00000034139	3	75046292	75074000
Pdcd10	ENSMUSG00000027835	3	75320412	75360778
Serpini1	ENSMUSG00000027834	3	75361469	75447417
Golim4	ENSMUSG00000034109	3	75680105	75760871
Fstl5	ENSMUSG00000034098	3	75878192	76513941
SNORA17	ENSMUSG00000088638	3	75518712	75518846
SNORA17	ENSMUSG00000088481	3	76909131	76909207
Mtap9	ENSMUSG00000033900	3	82161994	82199190
Npy2r	ENSMUSG00000028004	3	82342305	82352008
Rbm46	ENSMUSG00000033882	3	82641155	82680405
Lrat	ENSMUSG00000028003	3	82696501	82707895
Fgg	ENSMUSG00000033860	3	82811781	82818975
Fga	ENSMUSG00000028001	3	82830075	82838036
Fgb	ENSMUSG00000033831	3	82846169	82853725
4930564K09Rik	ENSMUSG00000086273	3	82680627	82747560
Gm6525	ENSMUSG00000078175	3	83978696	83979016
Plrg1	ENSMUSG00000027998	3	82859444	82876277
Gm10710	ENSMUSG00000074517	3	82929198	82933168
Sfrp2	ENSMUSG00000027996	3	83570243	83578238
Tlr2	ENSMUSG00000027995	3	83640195	83645689
D930015E06Rik	ENSMUSG00000033767	3	83702131	83844083
Mnd1	ENSMUSG00000033752	3	83891856	83959708
Trim2	ENSMUSG00000027993	3	83964361	84109368
Gm16790	ENSMUSG00000085848	3	83577775	83593878
7SK	ENSMUSG00000084596	3	83438499	83438796
U6	ENSMUSG00000088597	3	83506174	83506280
7SK	ENSMUSG00000087902	3	82597578	82597819
Gm8813	ENSMUSG00000085625	3	84356780	84357374
Fhdc1	ENSMUSG00000041842	3	84247947	84284351
Arfip1	ENSMUSG00000074513	3	84300015	85691438
Tigd4	ENSMUSG00000047819	3	84397496	84400954
Tmem154	ENSMUSG00000056498	3	84470114	84508497
Fbxw7	ENSMUSG00000028086	3	84619190	84783120
Dear1	ENSMUSG00000078550	3	84768978	84769502
Mir466k	ENSMUSG00000080424	3	85271299	85271420
Gm15535	ENSMUSG00000085527	3	85359968	85377867
Pet112l	ENSMUSG00000028085	3	85378041	85459544
Fam160a1	ENSMUSG00000051000	3	85463983	85550188
Gm9790	ENSMUSG00000044330	3	85719705	85719992
Glt28d2	ENSMUSG00000031286	3	85604969	85691440
Prss48	ENSMUSG00000049013	3	85797732	85806413
Sh3d19	ENSMUSG00000028082	3	85888356	85934444
Rps3a	ENSMUSG00000028081	3	85941862	85946624
Lrba	ENSMUSG00000028080	3	86028602	86586615
Snord73a	ENSMUSG00000064984	3	85942713	85942780
Rnu73b	ENSMUSG00000064390	3	85944540	85944610
U6	ENSMUSG00000089394	3	85995338	85995448
U7	ENSMUSG00000089077	3	85766693	85766754
SNORA32	ENSMUSG00000065847	3	85904456	85904577
U6	ENSMUSG00000064840	3	85712275	85712381
SNORA32	ENSMUSG00000077517	3	85754810	85754928
SNORA17	ENSMUSG00000077744	3	86079154	86079284
U6	ENSMUSG00000064867	3	86188169	86188275
U1	ENSMUSG00000065764	3	86168379	86168547
Mab21l2	ENSMUSG00000057777	3	86349503	86352205
Gm3788	ENSMUSG00000091955	3	86475690	86476166
Dclk2	ENSMUSG00000028078	3	86590073	86724803
U1	ENSMUSG00000064872	3	86734665	86734824
Cd1d2	ENSMUSG00000041750	3	86790508	86793455
BC027582	ENSMUSG00000091115	3	103535603	103536476
Olfml3	ENSMUSG00000027848	3	103537623	103541924
Gm10964	ENSMUSG00000078620	3	103543289	103550299
Hipk1	ENSMUSG00000008730	3	103543738	103595486
Dclre1b	ENSMUSG00000027845	3	103604528	103613367
Ap4b1	ENSMUSG00000032952	3	103613443	103625948
Bcl2l15	ENSMUSG00000044165	3	103636524	103658541
Ptpn22	ENSMUSG00000027843	3	103663718	103716170
Rsbn1	ENSMUSG00000044098	3	103718043	103770559
Phtf1	ENSMUSG00000058388	3	103772033	103828521
Magi3	ENSMUSG00000052539	3	103817182	104024297
Gm5546	ENSMUSG00000022187	3	104154558	104170536
Lrig2	ENSMUSG00000032913	3	104257907	104315840
Slc16a1	ENSMUSG00000032902	3	104442591	104462385
Fam19a3	ENSMUSG00000055865	3	104570324	104584758
Ppm1j	ENSMUSG00000002228	3	104583974	104588936
Rhoc	ENSMUSG00000002233	3	104591929	104597377
Mov10	ENSMUSG00000002227	3	104597754	104621481
Capza1	ENSMUSG00000070372	3	104625697	104667423
St7l	ENSMUSG00000045576	3	104667421	104730812
Wnt2b	ENSMUSG00000027840	3	104747723	104764627
Cttnbp2nl	ENSMUSG00000062127	3	104804833	104856064
4930564D02Rik	ENSMUSG00000051788	3	104869762	104881724
Kcnd3	ENSMUSG00000040896	3	105255248	105476920
Gm15986	ENSMUSG00000081910	3	103498721	103499120
Gm16520	ENSMUSG00000085855	3	103526145	103538152
Gm15886	ENSMUSG00000085754	3	103575875	103593325
Gm15471	ENSMUSG00000084997	3	103607052	103612362
Gm15472	ENSMUSG00000084760	3	103667089	103668346
Gm15602	ENSMUSG00000083630	3	103706450	103706886
A130049A11Rik	ENSMUSG00000089998	3	103768459	103772504
Gm6485	ENSMUSG00000089999	3	104555645	104556083
1700095B22Rik	ENSMUSG00000074346	3	105244513	105255873
U6	ENSMUSG00000084653	3	104405081	104405162
U6	ENSMUSG00000088016	3	103896304	103896405
snoU13	ENSMUSG00000089412	3	103464862	103464966
U6	ENSMUSG00000089452	3	104504793	104504882
SNORA17	ENSMUSG00000088479	3	104005033	104005148
AC123057.1	ENSMUSG00000084508	3	103470465	103470550
Ddx20	ENSMUSG00000027905	3	105481178	105490492
Fam110b	ENSMUSG00000049119	4	5571237	6035370
Ubxn2b	ENSMUSG00000028243	4	6118245	6148835
Cyp7a1	ENSMUSG00000028240	4	6192759	6202780
Sdcbp	ENSMUSG00000028249	4	6292797	6335570
Nsmaf	ENSMUSG00000028245	4	6323354	6381418
Tox	ENSMUSG00000041272	4	6613500	6918704
Gm11782	ENSMUSG00000087099	4	5472385	5478370
Gm11781	ENSMUSG00000084237	4	5530071	5530542
4930423M02Rik	ENSMUSG00000086066	4	5559475	5569431
Gm11796	ENSMUSG00000083232	4	5781663	5782634
Gm11797	ENSMUSG00000084360	4	5997021	5997774
Gm11798	ENSMUSG00000080961	4	6187238	6188112
4930430E12Rik	ENSMUSG00000085295	4	6279252	6284677
Gm10056	ENSMUSG00000058945	4	6372185	6375059
Gm11803	ENSMUSG00000081913	4	6435088	6435531
Gm11801	ENSMUSG00000081388	4	6466708	6467453
Gm11802	ENSMUSG00000086052	4	6615316	6631307
Gm11804	ENSMUSG00000083023	4	6966194	6966661
SNORA17	ENSMUSG00000077302	4	6561311	6561442
SNORA17	ENSMUSG00000077392	4	5614824	5614949
Car8	ENSMUSG00000041261	4	8070514	8166188
8430436N08Rik	ENSMUSG00000086070	4	7487835	7500948
Gm11795	ENSMUSG00000085630	4	7686817	7691077
Gm11794	ENSMUSG00000082024	4	7690411	7690647
Gm11800	ENSMUSG00000083068	4	8045767	8046883
Gm11799	ENSMUSG00000079993	4	8094041	8094500
SNORA17	ENSMUSG00000089167	4	7748063	7748194
Grhpr	ENSMUSG00000035637	4	44994267	45003606
Zbtb5	ENSMUSG00000049657	4	45004114	45025284
1700055D18Rik	ENSMUSG00000070997	4	45025702	45027271
Polr1e	ENSMUSG00000028318	4	45031455	45049437
Fbxo10	ENSMUSG00000048232	4	45047119	45097476
Tomm5	ENSMUSG00000078713	4	45118080	45120986
Gm10982	ENSMUSG00000078712	4	45122633	45126807
Frmpd1	ENSMUSG00000035615	4	45197747	45298808
Rg9mtd3	ENSMUSG00000035601	4	45309999	45329003
Exosc3	ENSMUSG00000028322	4	45329485	45355604
Dcaf10	ENSMUSG00000035572	4	45354973	45392631
Mcart1	ENSMUSG00000045973	4	45408795	45421633
Mcart1	ENSMUSG00000090906	4	45421051	45421623
Shb	ENSMUSG00000044813	4	45436150	45545342
Aldh1b1	ENSMUSG00000035561	4	45811894	45817476
Igfbpl1	ENSMUSG00000035551	4	45822340	45839795
1300002K09Rik	ENSMUSG00000028327	4	45861536	45899880
E230008N13Rik	ENSMUSG00000035539	4	45903175	45963639
Tdrd7	ENSMUSG00000035517	4	45978206	46047633
Tmod1	ENSMUSG00000028328	4	46051807	46128904
Tstd2	ENSMUSG00000035495	4	46127618	46151566
Ncbp1	ENSMUSG00000028330	4	46151485	46185275
Xpa	ENSMUSG00000028329	4	46168219	46209183
Foxe1	ENSMUSG00000070990	4	46356481	46359284
5830415F09Rik	ENSMUSG00000028331	4	46389377	46402309
Hemgn	ENSMUSG00000028332	4	46406861	46426378
Anp32b	ENSMUSG00000028333	4	46463774	46485529
Nans	ENSMUSG00000028334	4	46502120	46516504
Trim14	ENSMUSG00000039853	4	46506653	46549013
Coro2a	ENSMUSG00000028337	4	46549809	46615074
Tbc1d2	ENSMUSG00000039813	4	46617262	46663081
Gabbr2	ENSMUSG00000039809	4	46675190	47004745
Gm12447	ENSMUSG00000080816	4	46340168	46340637
Gm12443	ENSMUSG00000082242	4	46432852	46433174
Gm16731	ENSMUSG00000085990	4	46548773	46552674
Gm12678	ENSMUSG00000084854	4	44956625	44961202
Gm12493	ENSMUSG00000086000	4	44980641	44983968
Gm12679	ENSMUSG00000086205	4	44983448	44991191
Gm12566	ENSMUSG00000082628	4	45149122	45149480
2900093L17Rik	ENSMUSG00000086284	4	45247595	45256862
Gm12585	ENSMUSG00000083541	4	45351617	45351906
Gm12411	ENSMUSG00000081559	4	45562889	45563371
Gm12408	ENSMUSG00000085980	4	45652808	45655176
Gm829	ENSMUSG00000073860	4	45696461	45736210
Gm12410	ENSMUSG00000085305	4	45728041	45729293
Gm12409	ENSMUSG00000085876	4	45775249	45777095
Gm12412	ENSMUSG00000083685	4	45789754	45790081
Gm12444	ENSMUSG00000082194	4	46255886	46256771
Gm12445	ENSMUSG00000081483	4	46286691	46287712
Gm12446	ENSMUSG00000087383	4	46312879	46358387
SNORA36	ENSMUSG00000064410	4	46508027	46508157
U6	ENSMUSG00000065322	4	45561615	45561721
AL806523.1	ENSMUSG00000092924	4	46208251	46208358
7SK	ENSMUSG00000088069	4	46131052	46131318
AL772376.2	ENSMUSG00000093185	4	45409866	45409990
AL772376.1	ENSMUSG00000088892	4	45513357	45513424
Gm11261	ENSMUSG00000085840	4	78305762	78307492
Gm11262	ENSMUSG00000083629	4	78343556	78344832
Gm12913	ENSMUSG00000082697	4	78419581	78420125
Gm11263	ENSMUSG00000083496	4	78973612	78974360
Gm11409	ENSMUSG00000084248	4	79520255	79520657
Gm11407	ENSMUSG00000082179	4	79648235	79649292
Gm11408	ENSMUSG00000083076	4	79649300	79649818
Gm11410	ENSMUSG00000083219	4	79649893	79651035
SNORA17	ENSMUSG00000089543	4	78890491	78890613
7SK	ENSMUSG00000089338	4	78316051	78316136
Gm11406	ENSMUSG00000082555	4	80086302	80086785
Gm11247	ENSMUSG00000083578	4	80229883	80230190
Tyrp1	ENSMUSG00000005994	4	80480027	80497623
D4Bwg0951e	ENSMUSG00000048706	4	80556550	80601532
Mpdz	ENSMUSG00000028402	4	80924404	81088719
SNORA17	ENSMUSG00000077607	4	80984178	80984308
Gm11765	ENSMUSG00000081391	4	81101847	81107636
Gm11411	ENSMUSG00000083385	4	81342345	81343063
Gm11412	ENSMUSG00000087540	4	81389050	81392605
n-R5s187	ENSMUSG00000084718	4	81564417	81564527
Gm12914	ENSMUSG00000087608	4	81576382	81578278
Gm11264	ENSMUSG00000087110	4	81679216	81711794
Gm5860	ENSMUSG00000085022	4	81711335	81748712
AL591611.1	ENSMUSG00000092661	4	81707016	81707125
Nfib	ENSMUSG00000008575	4	81936077	82351654
n-R5s188	ENSMUSG00000084595	4	82085314	82085418
Gm11266	ENSMUSG00000087413	4	82153920	82193196
Gm11267	ENSMUSG00000084851	4	82230952	82233223
Zdhhc21	ENSMUSG00000028403	4	82444642	82505862
Cer1	ENSMUSG00000038192	4	82527655	82531052
Frem1	ENSMUSG00000059049	4	82543825	82698243
Gm11268	ENSMUSG00000084357	4	82288304	82288570
Gm11269	ENSMUSG00000086293	4	82338709	82339615
Gm11248	ENSMUSG00000082637	4	82767386	82767666
SNORA17	ENSMUSG00000089409	4	82724415	82724533
Ttc39b	ENSMUSG00000038172	4	82866204	82970159
Snapc3	ENSMUSG00000028483	4	83063628	83113580
Psip1	ENSMUSG00000028484	4	83101584	83132363
Gm11185	ENSMUSG00000083245	4	82839892	82840898
Gm11413	ENSMUSG00000086321	4	83024221	83036572
Gm11184	ENSMUSG00000087592	4	83028968	83038109
U6	ENSMUSG00000064951	4	82931708	82931814
Gm10154	ENSMUSG00000066116	4	83151051	83151458
4930473A06Rik	ENSMUSG00000052407	4	83171449	83510635
Gm11414	ENSMUSG00000082416	4	83146403	83146665
U4	ENSMUSG00000064606	4	83173532	83173672
Gm12695	ENSMUSG00000078639	4	96390338	96451877
Gm10192	ENSMUSG00000066990	4	96849531	96849857
E130114P18Rik	ENSMUSG00000048747	4	97234824	97444769
Nfia	ENSMUSG00000028565	4	97439425	97868605
Tm2d1	ENSMUSG00000028563	4	98022061	98049997
Inadl	ENSMUSG00000061859	4	98062476	98386294
L1td1	ENSMUSG00000087166	4	98393425	98405171
Kank4	ENSMUSG00000035407	4	98421589	98484228
Gm12696	ENSMUSG00000084159	4	97188119	97189023
Gm12697	ENSMUSG00000082683	4	97223095	97223761
Gm12676	ENSMUSG00000085710	4	97420859	97424080
Gm12691	ENSMUSG00000081096	4	97812835	97813290
Gm12692	ENSMUSG00000082388	4	97901436	97901981
Gm12787	ENSMUSG00000083644	4	97934774	97935266
0610025J13Rik	ENSMUSG00000046683	4	97988089	97998482
Gm12788	ENSMUSG00000082144	4	98019118	98019425
Gm12846	ENSMUSG00000081046	4	98331057	98332828
Gm17376	ENSMUSG00000090718	4	98412426	98412513
AL627124.1	ENSMUSG00000076294	4	98328328	98328423
Y_RNA	ENSMUSG00000064883	4	97942416	97942529
U6	ENSMUSG00000088548	4	98050093	98050182
AL671229.1	ENSMUSG00000093123	4	98224431	98224556
AL671140.1	ENSMUSG00000093135	4	98025885	98025994
A730085A09Rik	ENSMUSG00000085843	4	98460459	98465591
I0C0044D17Rik	ENSMUSG00000073794	4	98485166	98490531
Gm12851	ENSMUSG00000084188	4	98522305	98522725
Usp1	ENSMUSG00000028560	4	98590501	98602234
Dock7	ENSMUSG00000028556	4	98603356	98787606
Angptl3	ENSMUSG00000028553	4	98697645	98712802
Atg4c	ENSMUSG00000028550	4	98860625	98926478
Gm10305	ENSMUSG00000070892	4	98939362	98941836
Gm12689	ENSMUSG00000070891	4	98962591	98963382
Gm12852	ENSMUSG00000081733	4	98769751	98770469
Gm12705	ENSMUSG00000087395	4	98783105	98784992
Gm12681	ENSMUSG00000086498	4	98813605	98828333
Ube2u	ENSMUSG00000069733	4	100151465	100222752
Cachd1	ENSMUSG00000028532	4	100449280	100701825
Gm10577	ENSMUSG00000073789	4	100692903	100693301
Gm10576	ENSMUSG00000073788	4	100727163	100727867
Raver2	ENSMUSG00000035275	4	100741588	100824975
Jak1	ENSMUSG00000028530	4	100824972	100937887
Ak4	ENSMUSG00000028527	4	101091882	101140376
Dnajc6	ENSMUSG00000028528	4	101169253	101315404
Leprot	ENSMUSG00000035212	4	101320323	101331969
Lepr	ENSMUSG00000057722	4	101390009	101487957
B020004J07Rik	ENSMUSG00000035201	4	101507574	101516628
C130073F10Rik	ENSMUSG00000046133	4	101562625	101566394
Gm12800	ENSMUSG00000037028	4	101581726	101584513
Gm12794	ENSMUSG00000070890	4	101613012	101615788
Gm12790	ENSMUSG00000078626	4	101640058	101653654
Gm12789	ENSMUSG00000078625	4	101659231	101662836
Pde4b	ENSMUSG00000028525	4	101760148	102279864
Gm12698	ENSMUSG00000085871	4	100195852	100200406
Gm12699	ENSMUSG00000081553	4	100239713	100240653
Gm12700	ENSMUSG00000082601	4	100253883	100254339
Gm12785	ENSMUSG00000082928	4	100883021	100883192
Gm12801	ENSMUSG00000085863	4	100956826	100957808
Gm12796	ENSMUSG00000085721	4	100965019	100994350
Gm12793	ENSMUSG00000081621	4	101013962	101014253
E130102H24Rik	ENSMUSG00000086782	4	101019136	101028853
0610043K17Rik	ENSMUSG00000087361	4	101026388	101071786
Gm12795	ENSMUSG00000083614	4	101034782	101035495
Gm12798	ENSMUSG00000084758	4	101075686	101080461
Gm12791	ENSMUSG00000081121	4	101547952	101548606
Gm12797	ENSMUSG00000081045	4	101556645	101556917
Gm12792	ENSMUSG00000084208	4	101568569	101569587
Gm12799	ENSMUSG00000082264	4	101719173	101721732
U6	ENSMUSG00000077677	4	100859369	100859472
7SK	ENSMUSG00000089446	4	101227700	101227973
U7	ENSMUSG00000088551	4	100776193	100776255
Mir101a	ENSMUSG00000065451	4	101019550	101019632
U1	ENSMUSG00000065279	4	100943748	100943911
Ndufs5	ENSMUSG00000028648	4	123389953	123395445
Akirin1	ENSMUSG00000023075	4	123411802	123427588
Rhbdl2	ENSMUSG00000043333	4	123465117	123507147
4933427I04Rik	ENSMUSG00000073761	4	123536922	123540408
Mycbp	ENSMUSG00000028647	4	123582075	123589512
Rragc	ENSMUSG00000028646	4	123594689	123614240
3100002H09Rik	ENSMUSG00000051219	4	124287174	124288046
Pou3f1	ENSMUSG00000078236	4	124334050	124337899
Utp11l	ENSMUSG00000028907	4	124355404	124370844
Fhl3	ENSMUSG00000032643	4	124377945	124385855
Sf3a3	ENSMUSG00000028902	4	124392020	124409704
Inpp5b	ENSMUSG00000028894	4	124419094	124478755
Mtf1	ENSMUSG00000028890	4	124479348	124527044
1110065P20Rik	ENSMUSG00000078570	4	124526729	124527974
Yrdc	ENSMUSG00000028889	4	124527923	124532486
Maneal	ENSMUSG00000042763	4	124532483	124539415
Epha10	ENSMUSG00000028876	4	124558143	124595044
Cdca8	ENSMUSG00000028873	4	124595709	124616555
Rspo1	ENSMUSG00000028871	4	124663674	124686343
Gnl2	ENSMUSG00000028869	4	124693829	124732624
Dnali1	ENSMUSG00000042707	4	124732582	124742947
Snip1	ENSMUSG00000050213	4	124743916	124751286
Meaf6	ENSMUSG00000028863	4	124762378	124790482
Zc3h12a	ENSMUSG00000042677	4	124795667	124805084
Grik3	ENSMUSG00000001985	4	125167944	125391417
1700121C08Rik	ENSMUSG00000086275	4	123510865	123536756
Gm12904	ENSMUSG00000082310	4	123515347	123516745
D130007C19Rik	ENSMUSG00000054304	4	123579372	123580877
Gm12903	ENSMUSG00000080993	4	123579665	123580208
Gm12905	ENSMUSG00000085875	4	123582305	123594512
Gm12902	ENSMUSG00000082515	4	123603477	123603798
Gm12916	ENSMUSG00000086087	4	123970936	123977091
1700021L23Rik	ENSMUSG00000086955	4	123980080	123988704
4933435F18Rik	ENSMUSG00000086978	4	124003551	124009751
1700057H15Rik	ENSMUSG00000084757	4	124091659	124163202
4933407E24Rik	ENSMUSG00000073759	4	124246433	124251888
Pou3f1	ENSMUSG00000090125	4	124334889	124337899
Gm12917	ENSMUSG00000083104	4	124396243	124396881
Gm12915	ENSMUSG00000086589	4	124412974	124428598
1700125G02Rik	ENSMUSG00000085263	4	124568132	124572026
9930104L06Rik	ENSMUSG00000044730	4	124614292	124621900
Gm12930	ENSMUSG00000087011	4	124634891	124664253
Gm12931	ENSMUSG00000080934	4	124696744	124697067
Gm12932	ENSMUSG00000086342	4	124760101	124762191
1700041M05Rik	ENSMUSG00000087010	4	124905841	124919296
Ftl2	ENSMUSG00000082062	4	125181532	125182083
Gm17408	ENSMUSG00000091927	4	123575876	123582085
AL626775.1	ENSMUSG00000078049	4	124783500	124783581
AL606907.1	ENSMUSG00000077026	4	124413083	124413192
Mir697	ENSMUSG00000076271	4	124408938	124409046
Mir692-2a	ENSMUSG00000076035	4	125181993	125182101
n-R5s192	ENSMUSG00000084526	4	124498065	124498183
Mir698	ENSMUSG00000076119	4	124421025	124421133
U6	ENSMUSG00000088067	4	124374749	124374851
U6	ENSMUSG00000088933	4	124012821	124012924
Csf3r	ENSMUSG00000028859	4	125701794	125722219
Mrps15	ENSMUSG00000028861	4	125724169	125732776
Oscp1	ENSMUSG00000042616	4	125735809	125769439
Lsm10	ENSMUSG00000050188	4	125773867	125775828
Stk40	ENSMUSG00000042608	4	125781201	125818273
Fam176b	ENSMUSG00000050212	4	125824988	125827119
1700029G01Rik	ENSMUSG00000073758	4	125827846	125840735
Thrap3	ENSMUSG00000043962	4	125841326	125880004
Mtap7d1	ENSMUSG00000028849	4	125909411	125933587
Trappc3	ENSMUSG00000028847	4	125939569	125953127
Col8a2	ENSMUSG00000056174	4	125964037	125991574
Adprhl2	ENSMUSG00000042558	4	125993291	125998947
Tekt2	ENSMUSG00000028845	4	125999365	126002932
Eif2c3	ENSMUSG00000028842	4	126008948	126106800
Gm17553	ENSMUSG00000090490	4	126019033	126023474
2610028E06Rik	ENSMUSG00000085562	4	125565095	125599661
Rpl28-ps3	ENSMUSG00000079942	4	125747071	125747561
Gm12946	ENSMUSG00000086961	4	125823223	125824979
Gm12945	ENSMUSG00000087394	4	126000843	126002481
AL732624.1	ENSMUSG00000092789	4	125903194	125903265
AL606976.2	ENSMUSG00000092672	4	125971133	125971391
U6	ENSMUSG00000084504	4	125878419	125878521
Eif2c1	ENSMUSG00000041530	4	126112256	126145827
Eif2c4	ENSMUSG00000042500	4	126166785	126210716
Gm12929	ENSMUSG00000084099	4	126153546	126153915
Gm12928	ENSMUSG00000082381	4	126153971	126154543
Gm12935	ENSMUSG00000083461	4	126198913	126199331
Gm12934	ENSMUSG00000082888	4	126201574	126201916
AL606976.1	ENSMUSG00000080597	4	126054383	126054475
Clspn	ENSMUSG00000042489	4	126234179	126271147
5730409E04Rik	ENSMUSG00000073755	4	126287062	126291615
Psmb2	ENSMUSG00000028837	4	126354874	126386958
Tfap2e	ENSMUSG00000042477	4	126393250	126413484
Ncdn	ENSMUSG00000028833	4	126420994	126430682
AU040320	ENSMUSG00000028830	4	126430788	126547314
Zmym4	ENSMUSG00000042446	4	126539069	126645379
Sfpq	ENSMUSG00000028820	4	126698568	126714257
Zmym1	ENSMUSG00000043872	4	126724338	126738396
Zmym6	ENSMUSG00000042408	4	126754627	126801616
Gm12942	ENSMUSG00000070737	4	126800935	126806888
Dlgap3	ENSMUSG00000042388	4	126846448	126914266
BC003266	ENSMUSG00000042380	4	126921028	126925053
Gja4	ENSMUSG00000050234	4	126988665	126991283
Gjb3	ENSMUSG00000042367	4	127002479	127008088
Gjb4	ENSMUSG00000046623	4	127028330	127031325
Gjb5	ENSMUSG00000042357	4	127032053	127035425
Gm12936	ENSMUSG00000081319	4	126261753	126262053
Gm12933	ENSMUSG00000081210	4	126342498	126343369
Gm12937	ENSMUSG00000082498	4	126472717	126473659
Gm12939	ENSMUSG00000081609	4	126660683	126660847
Gm12940	ENSMUSG00000085334	4	126710975	126726642
Gm12941	ENSMUSG00000084088	4	126723627	126723846
Gm12944	ENSMUSG00000084149	4	126733506	126733968
Gm12943	ENSMUSG00000082220	4	126818523	126818732
Gm12948	ENSMUSG00000082047	4	126974028	126974709
Gm12947	ENSMUSG00000079998	4	127085623	127086042
4930471C06Rik	ENSMUSG00000086138	4	127152092	127154084
1700080G11Rik	ENSMUSG00000086771	4	127208866	127210129
A630031M04Rik	ENSMUSG00000087470	4	127222345	127247746
U6	ENSMUSG00000088982	4	126785710	126785815
SNORA17	ENSMUSG00000088984	4	126538224	126538356
AL606908.1	ENSMUSG00000092839	4	126508708	126509002
SNORA17	ENSMUSG00000077780	4	126495260	126495389
U6	ENSMUSG00000087987	4	126961975	126962077
1700112K13Rik	ENSMUSG00000087510	4	127487882	127489417
4930455G09Rik	ENSMUSG00000085761	4	141573813	141584911
Gm13053	ENSMUSG00000085574	4	141598827	141604493
Padi2	ENSMUSG00000028927	4	140462259	140508501
Sdhb	ENSMUSG00000009863	4	140517118	140535108
Atp13a2	ENSMUSG00000036622	4	140542788	140563245
Mfap2	ENSMUSG00000060572	4	140566333	140571899
Crocc	ENSMUSG00000040860	4	140572552	140616465
Necap2	ENSMUSG00000028923	4	140622427	140634272
Spata21	ENSMUSG00000045004	4	140644248	140668675
D4Ertd22e	ENSMUSG00000040842	4	140668916	140695690
Fbxo42	ENSMUSG00000028920	4	140703828	140759977
6330545A04Rik	ENSMUSG00000073733	4	140769871	140782671
C630004L07Rik	ENSMUSG00000091674	4	140794100	140795368
Arhgef19	ENSMUSG00000028919	4	140795490	140813479
Epha2	ENSMUSG00000006445	4	140857155	140885299
Fam131c	ENSMUSG00000006218	4	140924135	140940090
Clcnka	ENSMUSG00000033770	4	140940525	140954639
Clcnkb	ENSMUSG00000006216	4	140960268	140971929
Hspb7	ENSMUSG00000006221	4	140976694	140981226
Gm694	ENSMUSG00000070637	4	140988587	140992020
Zbtb17	ENSMUSG00000006215	4	141000569	141023845
Spen	ENSMUSG00000040761	4	141023805	141094512
Fblim1	ENSMUSG00000006219	4	141131977	141162011
Gm13031	ENSMUSG00000087698	4	140503581	140513817
Gm13047	ENSMUSG00000082246	4	140640779	140641593
Gm13055	ENSMUSG00000085774	4	140817677	140821931
Gm13056	ENSMUSG00000085395	4	140834354	140835709
Gm13074	ENSMUSG00000085836	4	140903729	140906768
Gm13076	ENSMUSG00000084238	4	140912803	140913006
Gm13075	ENSMUSG00000086061	4	140954744	140967106
B330016D10Rik	ENSMUSG00000048406	4	141102104	141103807
AI507597	ENSMUSG00000073731	4	141169941	141171519
1810035I16Rik	ENSMUSG00000086818	4	141400236	141402905
Gm13643	ENSMUSG00000085922	4	141441569	141453197
Gm13059	ENSMUSG00000081079	4	141532694	141533258
Gm13037	ENSMUSG00000085424	4	141538907	141542712
Gm10565	ENSMUSG00000073728	4	141639887	141644014
Gm13062	ENSMUSG00000087525	4	141736517	141740054
Gm13052	ENSMUSG00000085816	4	141863680	141902390
Gm13018	ENSMUSG00000082201	4	142147293	142147739
Tmem82	ENSMUSG00000043085	4	141169291	141174548
Slc25a34	ENSMUSG00000040740	4	141174739	141179736
Plekhm2	ENSMUSG00000028917	4	141181649	141220814
Ddi2	ENSMUSG00000078515	4	141233464	141279334
Rsc1a1	ENSMUSG00000040715	4	141239766	141241514
Agmat	ENSMUSG00000040706	4	141302587	141315178
Dnajc16	ENSMUSG00000040697	4	141316104	141346846
Casp9	ENSMUSG00000028914	4	141349527	141371891
Ctrc	ENSMUSG00000062478	4	141370877	141402274
Cela2a	ENSMUSG00000058579	4	141370877	141382075
Efhd2	ENSMUSG00000040659	4	141414057	141430835
Fhad1	ENSMUSG00000051435	4	141446353	141570997
Tmem51	ENSMUSG00000040616	4	141586907	141640219
Kazn	ENSMUSG00000040606	4	141658305	141795316
4921514A10Rik	ENSMUSG00000091088	4	140671575	140674002
U6	ENSMUSG00000064443	4	140474599	140474714
AL670285.1	ENSMUSG00000093180	4	140902079	140902155
Gm13038	ENSMUSG00000081838	4	142742475	142742933
Gm13039	ENSMUSG00000083826	4	142756506	142757299
Prdm2	ENSMUSG00000057637	4	142697294	142802898
Gm13045	ENSMUSG00000082407	4	142992247	142993316
Gm13042	ENSMUSG00000083930	4	143048281	143050441
Lrrc38	ENSMUSG00000028584	4	142939660	142960935
Pramel1	ENSMUSG00000041805	4	142984331	142990063
Pramef8	ENSMUSG00000046862	4	143002329	143010994
Oog4	ENSMUSG00000047799	4	143027067	143040227
Gm13040	ENSMUSG00000070616	4	143101215	143132374
Gm13043	ENSMUSG00000073726	4	143101215	143107736
Gm13057	ENSMUSG00000078514	4	143101246	143148137
Gm13050	ENSMUSG00000082575	4	142831927	142833271
Anp32b-ps1	ENSMUSG00000081792	4	142979321	142980687
Pdpn	ENSMUSG00000028583	4	142857334	142889467
Gm13046	ENSMUSG00000084059	4	143054177	143054677
Gm13044	ENSMUSG00000080909	4	143077829	143078081
Gm13041	ENSMUSG00000083403	4	143089338	143091998
SNORA17	ENSMUSG00000087903	4	142793968	142794099
7SK	ENSMUSG00000088395	4	142930302	142930609
BC080695	ENSMUSG00000070618	4	143157378	143163701
Gm13083	ENSMUSG00000066688	4	143204906	143208498
Gm13088	ENSMUSG00000078513	4	143243663	143247149
Gm13089	ENSMUSG00000070617	4	143286403	143292614
Gm13078	ENSMUSG00000046435	4	143309358	143319061
Gm13058	ENSMUSG00000081523	4	143184965	143187514
Gm13080	ENSMUSG00000044377	4	143201561	143201980
Gm13085	ENSMUSG00000084351	4	143253046	143253690
Gm13082	ENSMUSG00000081227	4	143261027	143261587
Gm13086	ENSMUSG00000081448	4	143274919	143276955
Gm13087	ENSMUSG00000082717	4	143325201	143325456
Gm13081	ENSMUSG00000082030	4	143335690	143341288
Gm7271	ENSMUSG00000091204	5	76913356	76945609
Exoc1	ENSMUSG00000036435	5	76958336	76999319
Cep135	ENSMUSG00000036403	5	77017723	77075491
Gm10430	ENSMUSG00000072855	5	77085537	77087380
C530008M17Rik	ENSMUSG00000036377	5	77086708	77302579
Aasdh	ENSMUSG00000055923	5	77302684	77334539
Ppat	ENSMUSG00000029246	5	77342274	77380603
Paics	ENSMUSG00000029247	5	77380332	77396534
Srp72	ENSMUSG00000036323	5	77403708	77428962
Arl9	ENSMUSG00000063820	5	77433080	77439631
1700023E05Rik	ENSMUSG00000029248	5	77445048	77490554
Hopx	ENSMUSG00000059325	5	77515468	77544186
Gm15831	ENSMUSG00000085858	5	77545835	77551373
Spink2	ENSMUSG00000053030	5	77634132	77640496
Rest	ENSMUSG00000029249	5	77694516	77715457
Noa1	ENSMUSG00000036285	5	77723199	77739109
Polr2b	ENSMUSG00000029250	5	77739172	77778349
Igfbp7	ENSMUSG00000036256	5	77778265	77837070
Gm7494	ENSMUSG00000083874	5	77171098	77171538
2310040G07Rik	ENSMUSG00000072852	5	77357393	77376783
1700112J05Rik	ENSMUSG00000086632	5	77435474	77447888
Gm15830	ENSMUSG00000087541	5	77523557	77531328
Pea15b	ENSMUSG00000047652	5	77940293	77940676
Mir5098	ENSMUSG00000093061	5	77701782	77701863
SNORA17	ENSMUSG00000089415	5	78098749	78098871
snoU13	ENSMUSG00000089567	5	77520753	77520856
Amtn	ENSMUSG00000029282	5	88805133	88814941
Ambn	ENSMUSG00000029288	5	88885036	88897552
Enam	ENSMUSG00000029286	5	88917007	88935074
Igj	ENSMUSG00000067149	5	88949537	88956916
Utp3	ENSMUSG00000070697	5	88983508	88985108
Rufy3	ENSMUSG00000029291	5	88994065	89080415
Grsf1	ENSMUSG00000044221	5	89088473	89105196
Mob1b	ENSMUSG00000006262	5	89149880	89191083
Dck	ENSMUSG00000029366	5	89194021	89212306
Slc4a4	ENSMUSG00000060961	5	89315843	89668678
Gc	ENSMUSG00000035540	5	89846549	89886790
Npffr2	ENSMUSG00000035528	5	89956454	90012765
Adamts3	ENSMUSG00000043635	5	90102866	90312359
Cox18	ENSMUSG00000035505	5	90643749	90653026
Ankrd17	ENSMUSG00000055204	5	90656215	90795211
Mkrn1-ps1	ENSMUSG00000082389	5	89267034	89268427
Eif5al3-ps	ENSMUSG00000043618	5	90561254	90561700
Gm15682	ENSMUSG00000082438	5	89168272	89168754
SNORA17	ENSMUSG00000077175	5	90257896	90258024
AC117578.1	ENSMUSG00000080523	5	90762598	90762651
7SK	ENSMUSG00000084500	5	90110941	90111264
Cryba4	ENSMUSG00000066975	5	112675513	112681538
Crybb1	ENSMUSG00000029343	5	112684835	112698605
Tpst2	ENSMUSG00000029344	5	112705711	112744381
Tfip11	ENSMUSG00000029345	5	112755378	112767093
Srrd	ENSMUSG00000029346	5	112766412	112772060
Hps4	ENSMUSG00000042328	5	112772103	112807434
Gm6583	ENSMUSG00000051503	5	112782821	112785053
Asphd2	ENSMUSG00000029348	5	112814468	112821233
Sez6l	ENSMUSG00000058153	5	112848180	113006205
Gm6588	ENSMUSG00000072722	5	112878446	112880758
Myo18b	ENSMUSG00000072720	5	113117896	113325382
Adrbk2	ENSMUSG00000042249	5	113339498	113444811
Crybb2	ENSMUSG00000042240	5	113487278	113499137
Crybb3	ENSMUSG00000029352	5	113504859	113510604
2900026A02Rik	ENSMUSG00000051339	5	113515343	113592371
Tmem211	ENSMUSG00000066964	5	113655929	113668283
Sgsm1	ENSMUSG00000042216	5	113672240	113739806
Aym1	ENSMUSG00000053873	5	113786314	113786841
Wscd2	ENSMUSG00000063430	5	113919467	114039679
Cmklr1	ENSMUSG00000042190	5	114062363	114100435
1700069L16Rik	ENSMUSG00000042184	5	114142431	114174781
Ficd	ENSMUSG00000053334	5	114185791	114190609
Sart3	ENSMUSG00000018974	5	114192455	114221658
Gm3511	ENSMUSG00000069196	5	114217108	114217421
Iscu	ENSMUSG00000025825	5	114222757	114228297
Tmem119	ENSMUSG00000054675	5	114243738	114250525
Selplg	ENSMUSG00000048163	5	114267807	114280510
Coro1c	ENSMUSG00000004530	5	114292445	114358767
Ssh1	ENSMUSG00000042121	5	114387103	114443903
Dao	ENSMUSG00000042096	5	114453712	114475458
Svop	ENSMUSG00000042078	5	114476919	114541579
Usp30	ENSMUSG00000029592	5	114550342	114573515
Alkbh2	ENSMUSG00000044339	5	114573935	114578227
Ung	ENSMUSG00000029591	5	114580395	114589332
RP23-459I1.1	ENSMUSG00000093637	5	112803389	112806659
Wscd2	ENSMUSG00000085571	5	113919772	113919960
Gm15736	ENSMUSG00000085713	5	114094972	114095691
Gm17122	ENSMUSG00000090458	5	114292610	114293125
Gm16108	ENSMUSG00000089734	5	114515470	114539475
Miat	ENSMUSG00000086878	5	112642248	112657968
AC151577.1	ENSMUSG00000093343	5	113690296	113690368
U6	ENSMUSG00000065373	5	113473164	113473272
U6	ENSMUSG00000065320	5	114378733	114378813
Acacb	ENSMUSG00000042010	5	114596544	114700770
Gm13784	ENSMUSG00000084243	5	114687185	114687934
Foxn4	ENSMUSG00000042002	5	114704173	114723816
Myo1h	ENSMUSG00000066952	5	114764950	114814585
Kctd10	ENSMUSG00000001098	5	114813576	114830524
Ube3b	ENSMUSG00000029577	5	114830637	114871177
Gm13789	ENSMUSG00000085590	5	114813424	114815366
Mmab	ENSMUSG00000029575	5	114881043	114894068
Mvk	ENSMUSG00000041939	5	114894278	114910600
BC057022	ENSMUSG00000041930	5	115018025	115063229
Trpv4	ENSMUSG00000014158	5	115072161	115108430
Gltp	ENSMUSG00000011884	5	115119412	115140993
Tchp	ENSMUSG00000002486	5	115157769	115172336
Git2	ENSMUSG00000041890	5	115177416	115225526
Gm13790	ENSMUSG00000086302	5	115001298	115004025
Ankrd13a	ENSMUSG00000041870	5	115224686	115256209
4930515G01Rik	ENSMUSG00000092183	5	115223746	115224992
1500011B03Rik	ENSMUSG00000072694	5	115258205	115263985
Gm20499	ENSMUSG00000092252	5	115259045	115273469
1500011B03Rik	ENSMUSG00000092279	5	115262802	115263954
Gm13820	ENSMUSG00000078187	5	115266974	115267111
2610524H06Rik	ENSMUSG00000092486	5	115271944	115273477
Gm13819	ENSMUSG00000082052	5	115278582	115279224
Gm13821	ENSMUSG00000078186	5	115292358	115292871
4930519G04Rik	ENSMUSG00000029564	5	115303673	115333668
Gm9936	ENSMUSG00000054123	5	115305767	115308691
Gm13823	ENSMUSG00000080707	5	115317690	115318034
Oasl2	ENSMUSG00000029561	5	115346943	115362243
Oasl1	ENSMUSG00000041827	5	115373249	115387924
Gm13822	ENSMUSG00000087477	5	115367327	115373286
2210016L21Rik	ENSMUSG00000029559	5	115392167	115399792
Hnf1a	ENSMUSG00000029556	5	115398370	115421076
Sppl3	ENSMUSG00000029550	5	115461146	115548799
Gm10401	ENSMUSG00000072693	5	115547698	115548304
Acads	ENSMUSG00000029545	5	115560308	115569355
Unc119b	ENSMUSG00000046562	5	115572559	115584984
Mlec	ENSMUSG00000048578	5	115592990	115608188
Cabp1	ENSMUSG00000029544	5	115618698	115644390
Gm13824	ENSMUSG00000086054	5	115418793	115448055
Gm13825	ENSMUSG00000086140	5	115418832	115421409
Gm13827	ENSMUSG00000086167	5	115503430	115503855
Gm13826	ENSMUSG00000072692	5	115552931	115560277
Gm13828	ENSMUSG00000083182	5	115648352	115648714
Pop5	ENSMUSG00000060152	5	115685845	115695360
Rnf10	ENSMUSG00000041740	5	115691421	115722907
Coq5	ENSMUSG00000041733	5	115729675	115746981
Gm13831	ENSMUSG00000083875	5	115713102	115713403
Dynll1	ENSMUSG00000009013	5	115747119	115751008
Srsf9	ENSMUSG00000029538	5	115777186	115783089
Gatc	ENSMUSG00000029536	5	115783251	115791187
Gm13829	ENSMUSG00000082610	5	115741772	115741909
Gm13830	ENSMUSG00000086368	5	115751129	115769217
Triap1	ENSMUSG00000029535	5	115791234	115793578
Cox6a1	ENSMUSG00000041697	5	115795651	115798990
4930401G09Rik	ENSMUSG00000086352	5	115808709	115810132
Gm13832	ENSMUSG00000087292	5	115809087	115872872
Msi1	ENSMUSG00000054256	5	115879608	115905707
4930430O22Rik	ENSMUSG00000057354	5	115886077	115886615
Pla2g1b	ENSMUSG00000029522	5	115916271	115924731
Sirt4	ENSMUSG00000029524	5	115928019	115934734
U4	ENSMUSG00000075998	5	115939468	115939608
U4	ENSMUSG00000075779	5	115940263	115940403
Gm13836	ENSMUSG00000081282	5	115941900	115942464
Pxn	ENSMUSG00000029528	5	115956685	116005996
Gm13840	ENSMUSG00000086849	5	115965272	115965956
Rplp0	ENSMUSG00000067274	5	116009476	116013736
Gcn1l1	ENSMUSG00000041638	5	116015263	116072665
Rab35	ENSMUSG00000029518	5	116081938	116097745
Ccdc64	ENSMUSG00000041609	5	116098184	116181630
Gm13841	ENSMUSG00000083833	5	116251568	116252219
Cit	ENSMUSG00000029516	5	116295287	116458956
Prkab1	ENSMUSG00000029513	5	116463595	116474517
Gm14508	ENSMUSG00000085376	5	116459325	116466114
Gm13842	ENSMUSG00000084992	5	116476420	116479239
Tmem233	ENSMUSG00000079278	5	116488764	116533253
Gm17420	ENSMUSG00000090728	5	116482155	116482322
Ccdc60	ENSMUSG00000043913	5	116574650	116738994
C330018A13Rik	ENSMUSG00000086655	5	116573623	116579119
Gm14507	ENSMUSG00000086122	5	116693715	116704962
Gm13837	ENSMUSG00000086055	5	116707670	116708653
Gm13839	ENSMUSG00000087124	5	116751309	116753523
Gm13838	ENSMUSG00000084921	5	116755691	116759369
B230112J18Rik	ENSMUSG00000086715	5	116762369	116768290
Dhx37	ENSMUSG00000029480	5	125894230	125914491
Bri3bp	ENSMUSG00000037905	5	125921938	125941242
Aacs	ENSMUSG00000029482	5	125956184	125997782
Tmem132b	ENSMUSG00000070498	5	126102858	126179143
Tmem132b	ENSMUSG00000029483	5	126259004	126268438
Gm4868	ENSMUSG00000091970	5	126328322	126329110
Tmem132c	ENSMUSG00000034324	5	127722178	128046163
1700085B03Rik	ENSMUSG00000087104	5	127737228	127762004
U6	ENSMUSG00000070220	5	126869918	126870024
U6	ENSMUSG00000084551	5	126994245	126994351
Caln1	ENSMUSG00000060371	5	130845346	131316515
Wbscr17	ENSMUSG00000034040	5	131347952	131783948
Auts2	ENSMUSG00000029673	5	131913205	133019214
U6	ENSMUSG00000088972	5	131258567	131258674
Zan	ENSMUSG00000079173	5	137819865	137918292
Epo	ENSMUSG00000029711	5	137923487	137974470
Pop7	ENSMUSG00000029715	5	137942666	137943746
Gigyf1	ENSMUSG00000029714	5	137960108	137969162
Gnb2	ENSMUSG00000029713	5	137969355	137974738
Actl6b	ENSMUSG00000029712	5	137994745	138010810
Tfr2	ENSMUSG00000029716	5	138011079	138028709
Mospd3	ENSMUSG00000037221	5	138037873	138042286
Pcolce	ENSMUSG00000029718	5	138046331	138055012
Fbxo24	ENSMUSG00000089984	5	138053731	138070230
Lrch4	ENSMUSG00000093445	5	138070349	138082327
Lrch4	ENSMUSG00000029720	5	138070403	138084127
Sap25	ENSMUSG00000079165	5	138082562	138084130
Irs3	ENSMUSG00000047182	5	138084260	138086942
Agfg2	ENSMUSG00000029722	5	138091711	138125954
6430598A04Rik	ENSMUSG00000045348	5	138172111	138182835
Tsc22d4	ENSMUSG00000029723	5	138186958	138209678
Ppp1r35	ENSMUSG00000029725	5	138220077	138221338
Mepce	ENSMUSG00000029726	5	138223134	138227943
Zcwpw1	ENSMUSG00000037108	5	138229026	138263849
Pilra	ENSMUSG00000046245	5	138263180	138277506
Pilrb1	ENSMUSG00000066684	5	138293375	138299277
Pilrb2	ENSMUSG00000066682	5	138307057	138312986
Cyp3a13	ENSMUSG00000029727	5	138334160	138362847
Gjc3	ENSMUSG00000056966	5	138395037	138404187
Azgp1	ENSMUSG00000037053	5	138422749	138431461
Gm4963	ENSMUSG00000063739	5	138434275	138434652
Smok3a	ENSMUSG00000075599	5	138462504	138475893
Smok3b	ENSMUSG00000075598	5	138478452	138491863
Zkscan1	ENSMUSG00000029729	5	138526312	138549050
Zscan21	ENSMUSG00000037017	5	138558131	138575493
Zfp113	ENSMUSG00000037007	5	138580930	138596972
Cops6	ENSMUSG00000019494	5	138602299	138605874
Mcm7	ENSMUSG00000029730	5	138605811	138613650
Ap4m1	ENSMUSG00000019518	5	138613230	138619936
Taf6	ENSMUSG00000036980	5	138619845	138628679
Cnpy4	ENSMUSG00000036968	5	138628713	138635146
Mblac1	ENSMUSG00000049285	5	138635542	138636628
Gm454	ENSMUSG00000089783	5	138644837	138648536
BC055004	ENSMUSG00000047592	5	138667126	138694591
0910001L09Rik	ENSMUSG00000050552	5	138696836	138700626
BC037034	ENSMUSG00000036948	5	138700884	138705280
BC037034	ENSMUSG00000091964	5	138700886	138705274
Gal3st4	ENSMUSG00000075593	5	138706149	138714068
Gpc2	ENSMUSG00000029510	5	138706180	138721233
Stag3	ENSMUSG00000036928	5	138721468	138753621
Gm10874	ENSMUSG00000075591	5	138804947	138829515
Zfp157	ENSMUSG00000036898	5	138882696	138901922
1700123K08Rik	ENSMUSG00000029526	5	139003068	139005922
Zfp68	ENSMUSG00000058291	5	139045844	139060989
A430033K04Rik	ENSMUSG00000056014	5	139064087	139090052
Fam20c	ENSMUSG00000025854	5	139230468	139286031
Pdgfa	ENSMUSG00000025856	5	139451968	139473324
Gm17247	ENSMUSG00000090903	5	139461462	139461950
6330403L08Rik	ENSMUSG00000075585	5	139471010	139476530
Prkar1b	ENSMUSG00000025855	5	139493260	139625955
Heatr2	ENSMUSG00000025857	5	139626177	139662464
Sun1	ENSMUSG00000036817	5	139676591	139725794
Get4	ENSMUSG00000025858	5	139728278	139746005
Adap1	ENSMUSG00000056413	5	139747830	139801576
Cox19	ENSMUSG00000045438	5	139812143	139821187
Cyp2w1	ENSMUSG00000029541	5	139828571	139832987
3110082I17Rik	ENSMUSG00000053553	5	139835693	139936456
Gpr146	ENSMUSG00000044197	5	139853696	139872369
D830046C22Rik	ENSMUSG00000021206	5	139854174	139855213
C130050O18Rik	ENSMUSG00000044092	5	139881234	139891577
Gm17112	ENSMUSG00000090873	5	137973651	137981946
Gm16089	ENSMUSG00000081228	5	138056855	138057190
Gm15498	ENSMUSG00000079163	5	138126382	138131979
Gm15753	ENSMUSG00000082088	5	138161582	138162968
Gm15502	ENSMUSG00000083813	5	138337980	138338187
Smok3c	ENSMUSG00000079156	5	138494423	138507767
6330418K02Rik	ENSMUSG00000085227	5	138705271	138707889
Got2-ps1	ENSMUSG00000080935	5	138805488	138806780
Gm5564	ENSMUSG00000046440	5	138946066	138947174
Gm15497	ENSMUSG00000081142	5	139051967	139052517
Gm15672	ENSMUSG00000086873	5	139623530	139626647
Mir93	ENSMUSG00000065527	5	138606751	138606838
Mir339	ENSMUSG00000065593	5	139845604	139845699
U6	ENSMUSG00000064892	5	138819819	138819925
AC125115.1	ENSMUSG00000092916	5	139047927	139048009
Mir106b	ENSMUSG00000065514	5	138606965	138607046
Mir25	ENSMUSG00000065394	5	138606549	138606632
U4	ENSMUSG00000084469	5	138660965	138661044
Gpr30	ENSMUSG00000053647	5	139899105	139903754
Zfand2a	ENSMUSG00000053581	5	139947165	139960503
Uncx	ENSMUSG00000029546	5	140019448	140079180
U6	ENSMUSG00000065300	5	139919553	139919659
Micall2	ENSMUSG00000036718	5	140182647	140212290
Ints1	ENSMUSG00000029547	5	140227236	140251632
Mafk	ENSMUSG00000018143	5	140267467	140278607
Tmem184a	ENSMUSG00000036687	5	140278439	140295871
Psmg3	ENSMUSG00000029551	5	140299548	140302797
Elfn1	ENSMUSG00000048988	5	140383897	140450665
7SK	ENSMUSG00000064694	5	140320884	140321204
Lmtk2	ENSMUSG00000038970	5	144861305	144949073
Bhlha15	ENSMUSG00000052271	5	144951155	144955310
Tecpr1	ENSMUSG00000066621	5	144955311	144984484
Bri3	ENSMUSG00000047843	5	145005306	145207626
Baiap2l1	ENSMUSG00000038859	5	145025395	145118981
Nptx2	ENSMUSG00000059991	5	145306756	145318347
Tmem130	ENSMUSG00000043388	5	145496784	145522518
Trrap	ENSMUSG00000045482	5	145528961	145620647
Smurf1	ENSMUSG00000038780	5	145637364	145726716
Kpna7	ENSMUSG00000038770	5	145744388	145844899
Gm4871	ENSMUSG00000061707	5	145790469	145793633
1700018F24Rik	ENSMUSG00000029620	5	145803859	145806547
Arpc1a	ENSMUSG00000029621	5	145844699	145869630
Arpc1b	ENSMUSG00000029622	5	145875084	145891574
Pdap1	ENSMUSG00000029623	5	145889638	145901107
Bud31	ENSMUSG00000038722	5	145901231	145908947
Ptcd1	ENSMUSG00000029624	5	145908383	145927977
Cpsf4	ENSMUSG00000029625	5	145928082	145942910
Atp5j2	ENSMUSG00000038690	5	145944567	145952931
Zkscan14	ENSMUSG00000029627	5	145955815	145962751
Zkscan5	ENSMUSG00000055991	5	145965431	145982619
Zfp655	ENSMUSG00000007812	5	145992592	146008175
Zfp498	ENSMUSG00000070420	5	146044212	146052338
Cyp3a57	ENSMUSG00000070419	5	146106148	146151381
Cyp3a16	ENSMUSG00000038656	5	146197178	146230592
Cyp3a41b	ENSMUSG00000075552	5	146319544	146345599
Cyp3a41a	ENSMUSG00000075551	5	146505635	146531712
Cyp3a44	ENSMUSG00000054417	5	146585559	146617450
Cyp3a11	ENSMUSG00000056035	5	146666002	146691540
Cyp3a25	ENSMUSG00000029630	5	146788770	146821194
Cyp3a59	ENSMUSG00000061292	5	146890834	146924861
2900089D17Rik	ENSMUSG00000087484	5	145002559	145017055
Gm15708	ENSMUSG00000086894	5	145037930	145041382
Gm15709	ENSMUSG00000083574	5	145167471	145167683
Gm6272	ENSMUSG00000082524	5	145484496	145484666
SNORA70	ENSMUSG00000088685	5	145535294	145535422
AC127411.1	ENSMUSG00000093455	5	145957917	145958194
Gm6309	ENSMUSG00000079096	5	146979552	146996880
Rnf6	ENSMUSG00000029634	5	147020768	147033131
Cdk8	ENSMUSG00000029635	5	147042806	147114450
Gsx1	ENSMUSG00000053129	5	148000272	148002523
Gm17398	ENSMUSG00000091377	5	148211130	148213493
Pdx1	ENSMUSG00000029644	5	148081535	148089584
Cdx2	ENSMUSG00000029646	5	148112381	148118846
Prhoxnb	ENSMUSG00000075543	5	148126562	148134016
Flt3	ENSMUSG00000042817	5	148142317	148212065
Pan3	ENSMUSG00000029647	5	148241737	148360078
Flt1	ENSMUSG00000029648	5	148373180	148537587
Mtif3	ENSMUSG00000016510	5	147763149	147775376
Lnx2	ENSMUSG00000016520	5	147828231	147888162
Polr1d	ENSMUSG00000029642	5	147888626	147922937
Gm15739	ENSMUSG00000080957	5	147060127	147060998
Gm15633	ENSMUSG00000083988	5	147912138	147912629
2210019I11Rik	ENSMUSG00000092570	5	148040172	148083097
Gm6054	ENSMUSG00000057157	5	148220558	148220935
Wasf3	ENSMUSG00000029636	5	147196561	147283987
Gm6370	ENSMUSG00000079094	5	147302938	147305530
4930449I24Rik	ENSMUSG00000079093	5	147314004	147316759
Gm3402	ENSMUSG00000041505	5	147325701	147328300
Gm3404	ENSMUSG00000079091	5	147337377	147340129
Gm3409	ENSMUSG00000079090	5	147349252	147351825
Gm3415	ENSMUSG00000079089	5	147367740	147370313
Gpr12	ENSMUSG00000041468	5	147393727	147396815
Usp12	ENSMUSG00000029640	5	147546385	147606582
Rpl21	ENSMUSG00000041453	5	147644466	147648608
Rasl11a	ENSMUSG00000029641	5	147656647	147659302
Gm10858	ENSMUSG00000075546	5	147705790	147708726
Gtf3a	ENSMUSG00000016503	5	147760233	147767190
Mir5105	ENSMUSG00000093077	5	147072579	147072660
SNORA17	ENSMUSG00000077735	5	148011700	148011829
SNORD102	ENSMUSG00000077185	5	147646410	147646480
SNORA27	ENSMUSG00000077564	5	147646720	147646848
Pomp	ENSMUSG00000029649	5	148672204	148687354
Slc46a3	ENSMUSG00000029650	5	148690013	148706391
Mtus2	ENSMUSG00000029651	5	148768896	149127641
Gm15721	ENSMUSG00000085565	5	148761458	148768742
Gm17725	ENSMUSG00000091555	6	51329709	51342776
Gm15055	ENSMUSG00000085412	6	52052948	52062531
Gm8078	ENSMUSG00000081979	6	52068241	52068890
Gm15052	ENSMUSG00000082781	6	52081777	52082045
Gm15051	ENSMUSG00000087658	6	52106901	52112118
5730446D14Rik	ENSMUSG00000056445	6	52115673	52119563
Gm15050	ENSMUSG00000087626	6	52122880	52124058
2700086A05Rik	ENSMUSG00000085696	6	52125216	52165075
9930038K12Rik	ENSMUSG00000092475	6	52178246	52180531
9930038K12Rik	ENSMUSG00000056583	6	52180079	52180529
Hoxa11as	ENSMUSG00000086427	6	52194392	52199798
Gm15053	ENSMUSG00000055408	6	52212769	52217597
5730457N03Rik	ENSMUSG00000086126	6	52258383	52264826
Gm8129	ENSMUSG00000059159	6	52296724	52296939
Gm15054	ENSMUSG00000084282	6	52307538	52307818
Hnrnpa2b1	ENSMUSG00000004980	6	51410433	51419893
Cbx3	ENSMUSG00000029836	6	51420359	51433703
Snx10	ENSMUSG00000038301	6	51473900	51540678
Skap2	ENSMUSG00000059182	6	51809165	51962548
Hoxa1	ENSMUSG00000029844	6	52105366	52108316
Hoxa2	ENSMUSG00000014704	6	52112350	52115412
RP23-103L13.8	ENSMUSG00000093412	6	52113358	52163338
Hoxa3	ENSMUSG00000079560	6	52118509	52163335
5730596B20Rik	ENSMUSG00000056468	6	52127497	52130850
Hoxa4	ENSMUSG00000000942	6	52139670	52141752
Hoxa3	ENSMUSG00000059723	6	52149150	52163335
Hoxa5	ENSMUSG00000038253	6	52151753	52154586
Hoxa6	ENSMUSG00000043219	6	52155430	52161355
Hoxa7	ENSMUSG00000038236	6	52164490	52171853
Hoxa9	ENSMUSG00000038227	6	52173099	52181088
Hoxa10	ENSMUSG00000000938	6	52181196	52190853
Hoxa11	ENSMUSG00000038210	6	52192107	52196213
Hoxa13	ENSMUSG00000038203	6	52207693	52210874
Evx1	ENSMUSG00000005503	6	52263492	52268372
Hibadh	ENSMUSG00000029776	6	52496222	52590383
Nfe2l3	ENSMUSG00000029832	6	51382669	51408767
G930045G22Rik	ENSMUSG00000073072	6	50796523	50828078
Tax1bp1	ENSMUSG00000004535	6	52663723	52716774
Jazf1	ENSMUSG00000063568	6	52718791	53018625
Mir148a	ENSMUSG00000065505	6	51219811	51219909
SNORA32	ENSMUSG00000064792	6	52589228	52589349
AC153877.1	ENSMUSG00000092936	6	51571631	51571707
Mir196b	ENSMUSG00000065443	6	52180080	52180164
Sox5	ENSMUSG00000041540	6	143776945	144730497
Bcat1	ENSMUSG00000030268	6	144942355	145024704
Lrmp	ENSMUSG00000030263	6	145064173	145123454
Casc1	ENSMUSG00000043541	6	145123354	145159490
Lyrm5	ENSMUSG00000040370	6	145159654	145165459
Kras	ENSMUSG00000030265	6	145165219	145198759
Ifltd1	ENSMUSG00000054966	6	145313654	145562839
Tuba3b	ENSMUSG00000067338	6	145564277	145569999
Rassf8	ENSMUSG00000030259	6	145695268	145769599
4933415D12Rik	ENSMUSG00000087302	6	143970428	143972298
Gm15685	ENSMUSG00000087157	6	144429745	144449936
Gm10396	ENSMUSG00000072677	6	144618947	144621240
4933425H06Rik	ENSMUSG00000085785	6	144621388	144642354
Gm15686	ENSMUSG00000086282	6	144669431	144708403
Gm7518	ENSMUSG00000086731	6	144672085	144673427
Gm15687	ENSMUSG00000086643	6	145004909	145008412
Gm15543	ENSMUSG00000086863	6	145130795	145136150
Gm15706	ENSMUSG00000086013	6	145199049	145200369
Rps25-ps1	ENSMUSG00000067344	6	145214906	145215345
2010013B24Rik	ENSMUSG00000087277	6	145251672	145257471
Gm15707	ENSMUSG00000083962	6	145264133	145265128
1700073E17Rik	ENSMUSG00000087204	6	145336116	145350699
Gm15499	ENSMUSG00000086722	6	145390276	145392548
Gm15704	ENSMUSG00000085658	6	145687213	145694793
Gm17263	ENSMUSG00000091392	6	144996079	144998950
5S_rRNA	ENSMUSG00000088867	6	144986594	144986708
SNORA17	ENSMUSG00000088362	6	145315378	145315464
SNORA17	ENSMUSG00000087850	6	144752020	144752152
AC125145.1	ENSMUSG00000093698	6	144516797	144516850
SNORA17	ENSMUSG00000088781	6	145412709	145412823
7SK	ENSMUSG00000087852	6	145236448	145236777
Zfp329	ENSMUSG00000057894	7	13390326	13404207
Zfp110	ENSMUSG00000058638	7	13420110	13435926
Zfp128	ENSMUSG00000060397	7	13466526	13478771
Zscan22	ENSMUSG00000054715	7	13483164	13494432
Rps5	ENSMUSG00000012848	7	13507639	13512035
2310014L17Rik	ENSMUSG00000033967	7	13512765	13516421
Zfp324	ENSMUSG00000004500	7	13551187	13559585
Zfp446	ENSMUSG00000033961	7	13563197	13569689
Slc27a5	ENSMUSG00000030382	7	13573695	13583541
1810019N24Rik	ENSMUSG00000091727	7	13533941	13547117
Vmn1r-ps53	ENSMUSG00000092489	7	12238479	12239400
Vmn1r-ps54	ENSMUSG00000092631	7	12367438	12367615
Vmn1r-ps55	ENSMUSG00000092326	7	12439306	12439697
Vmn1r-ps56	ENSMUSG00000092285	7	12496595	12497559
Vmn1r-ps57	ENSMUSG00000092466	7	12550911	12551198
Vmn1r-ps58	ENSMUSG00000092208	7	12562299	12563138
Vmn1r-ps59	ENSMUSG00000092398	7	12580232	12580430
Vmn1r-ps60	ENSMUSG00000092318	7	12590415	12591659
Gm10179	ENSMUSG00000066807	7	12671271	12671961
Vmn1r-ps61	ENSMUSG00000092535	7	12676626	12677447
Vmn1r-ps62	ENSMUSG00000092350	7	12698614	12699890
Vmn1r-ps63	ENSMUSG00000092248	7	12723670	12724658
Vmn1r-ps64	ENSMUSG00000092351	7	12787051	12787705
Vmn1r-ps65	ENSMUSG00000092476	7	12799944	12800894
Vmn1r-ps66	ENSMUSG00000092331	7	12977621	12978232
Vmn1r-ps67	ENSMUSG00000092610	7	12984400	12985090
Vmn1r-ps68	ENSMUSG00000092359	7	12989450	12989848
Vmn2r-ps53	ENSMUSG00000092583	7	13030707	13054201
Gm15877	ENSMUSG00000081550	7	13102754	13103717
Gm15773	ENSMUSG00000082872	7	13188545	13189992
Zscan4c	ENSMUSG00000054272	7	11591071	11595896
Zscan4d	ENSMUSG00000090714	7	11746992	11751497
Zscan4e	ENSMUSG00000091880	7	11891727	11896031
Zscan4f	ENSMUSG00000070828	7	11983264	11988090
Zscan4-ps2	ENSMUSG00000070826	7	12099659	12104460
Vmn1r72	ENSMUSG00000070824	7	12254948	12255868
Vmn1r73	ENSMUSG00000051687	7	12341606	12342517
Vmn1r74	ENSMUSG00000047655	7	12432124	12433038
Vmn1r75	ENSMUSG00000043308	7	12465692	12466609
Vmn1r76	ENSMUSG00000045713	7	12515660	12516634
Vmn1r77	ENSMUSG00000091201	7	12626648	12627568
Vmn1r78	ENSMUSG00000061602	7	12737813	12738754
Vmn1r79	ENSMUSG00000046443	7	12761542	12762462
Vmn1r80	ENSMUSG00000057161	7	12778314	12779240
Vmn1r81	ENSMUSG00000066805	7	12845108	12846028
Vmn1r82	ENSMUSG00000058132	7	12890154	12891068
Vmn1r83	ENSMUSG00000066804	7	12906529	12907524
Vmn1r84	ENSMUSG00000066803	7	12947157	12948113
Zfp551	ENSMUSG00000034071	7	13000502	13008100
Zfp606	ENSMUSG00000030386	7	13063642	13081584
2900092C05Rik	ENSMUSG00000030385	7	13097866	13141672
Vmn2r53	ENSMUSG00000091797	7	13166819	13191893
Vmn2r54	ENSMUSG00000053088	7	13200582	13221483
Vmn2r55	ENSMUSG00000091045	7	13237055	13270340
Vmn2r56	ENSMUSG00000090762	7	13279347	13318454
Zscan18	ENSMUSG00000070822	7	13353441	13361007
AC114404.1	ENSMUSG00000077138	7	12944247	12944356
AC155315.1	ENSMUSG00000076988	7	11935799	11935874
U6	ENSMUSG00000065006	7	13516123	13516229
AC151974.1	ENSMUSG00000080350	7	11888567	11888687
U6	ENSMUSG00000075773	7	12552499	12552605
Dll3	ENSMUSG00000003436	7	29076673	29087257
BC089491	ENSMUSG00000046750	7	29069671	29076205
Ttc9b	ENSMUSG00000007944	7	28438934	28441227
Sertad1	ENSMUSG00000008384	7	28271929	28275335
Sertad3	ENSMUSG00000055200	7	28258787	28262378
Gm17248	ENSMUSG00000090904	7	28712743	28716022
Timm50	ENSMUSG00000003438	7	29090535	29097091
Supt5h	ENSMUSG00000003435	7	29099917	29123738
Rps16	ENSMUSG00000037563	7	29135671	29137715
Plekhg2	ENSMUSG00000037552	7	29144623	29157681
Map3k10	ENSMUSG00000040390	7	28441394	28459617
C030039L03Rik	ENSMUSG00000057093	7	28474359	28491503
Zfp60	ENSMUSG00000037640	7	28516408	28538721
Zfp626	ENSMUSG00000030604	7	28592223	28603811
Zfp59	ENSMUSG00000078779	7	28627874	28641995
Zfp607	ENSMUSG00000020420	7	28647576	28664586
1700049G17Rik	ENSMUSG00000070709	7	28692411	28714479
Zfp780b	ENSMUSG00000063047	7	28747727	28759804
Zfp850	ENSMUSG00000074608	7	28769875	28770815
Psmc4	ENSMUSG00000030603	7	28826726	28835120
Fcgbp	ENSMUSG00000047730	7	28856255	28905881
Gm10935	ENSMUSG00000078384	7	28884679	28887506
Zfp36	ENSMUSG00000044786	7	29161803	29164274
Med29	ENSMUSG00000003444	7	29171165	29177727
Paf1	ENSMUSG00000003437	7	29177970	29184407
Samd4b	ENSMUSG00000037513	7	29184568	29208857
Gmfg	ENSMUSG00000060791	7	29222466	29233252
Lrfn1	ENSMUSG00000030600	7	29237257	29252567
Il28a	ENSMUSG00000059128	7	29293855	29295474
Il28b	ENSMUSG00000060747	7	29307760	29309366
Sycn	ENSMUSG00000084174	7	29325904	29327229
Nccrp1	ENSMUSG00000047586	7	29328615	29332273
Pak4	ENSMUSG00000030602	7	29343838	29383204
Gm15883	ENSMUSG00000086868	7	27909500	27915693
Gm15567	ENSMUSG00000084974	7	28034282	28042951
Gm15570	ENSMUSG00000083622	7	28056787	28057411
Pgam1-ps2	ENSMUSG00000082016	7	28254790	28255554
Gm15541	ENSMUSG00000087371	7	28287737	28293141
Gm10651	ENSMUSG00000074243	7	28734174	28734782
Shkbp1	ENSMUSG00000089832	7	28127152	28141038
Gm20479	ENSMUSG00000092367	7	28137668	28142438
Spnb4	ENSMUSG00000011751	7	28141402	28232705
Blvrb	ENSMUSG00000040466	7	28232997	28251163
Prx	ENSMUSG00000053198	7	28284343	28305233
Hipk4	ENSMUSG00000040424	7	28308280	28316194
Pld3	ENSMUSG00000003363	7	28317019	28338237
2310022A10Rik	ENSMUSG00000049643	7	28338314	28367113
9530053A07Rik	ENSMUSG00000078776	7	28914485	28949830
Fbl	ENSMUSG00000046865	7	28954765	28964288
Dyrk1b	ENSMUSG00000002409	7	28964488	28972313
Eid2	ENSMUSG00000046058	7	29052900	29054184
Eid2b	ENSMUSG00000070705	7	29062725	29065148
Vmn1r185	ENSMUSG00000091924	7	27396040	27397183
Cyp2b23	ENSMUSG00000040650	7	27450246	27471456
Cyp2b19	ENSMUSG00000066704	7	27542182	27557649
Cyp2g1	ENSMUSG00000049685	7	27593946	27606216
Cyp2a5	ENSMUSG00000005547	7	27620324	27628567
Cyp2a22	ENSMUSG00000091867	7	27716650	27724405
Cyp2a12	ENSMUSG00000060407	7	27814109	27821826
Cyp2f2	ENSMUSG00000052974	7	27904928	27918679
Cyp2t4	ENSMUSG00000078787	7	27938733	27943687
Egln2	ENSMUSG00000058709	7	27943677	27951821
Rab4b	ENSMUSG00000053291	7	27953443	27963915
Mia1	ENSMUSG00000089661	7	27953449	27966176
Snrpa	ENSMUSG00000061479	7	27972024	27981290
BC024978	ENSMUSG00000078786	7	27980800	27990405
Itpkc	ENSMUSG00000003752	7	27992191	28013647
Adck4	ENSMUSG00000003762	7	28018042	28047271
Numbl	ENSMUSG00000063160	7	28043452	28067163
Ltbp4	ENSMUSG00000040488	7	28090155	28122711
Akt2	ENSMUSG00000004056	7	28376571	28425845
Mir1191	ENSMUSG00000080533	7	27990555	27990674
SNORA40	ENSMUSG00000077711	7	29136527	29136651
Mir3101	ENSMUSG00000093348	7	27961025	27961112
U6	ENSMUSG00000064793	7	28908273	28908378
AC157561.1	ENSMUSG00000080562	7	28148333	28148420
C330005M16Rik	ENSMUSG00000037469	7	29392653	29416351
Fbxo27	ENSMUSG00000037463	7	29477868	29484357
Fbxo17	ENSMUSG00000030598	7	29501823	29523163
Mrps12	ENSMUSG00000045948	7	29524660	29526839
Sars2	ENSMUSG00000070699	7	29527010	29538871
Capn12	ENSMUSG00000054083	7	29666675	29678604
Actn4	ENSMUSG00000054808	7	29678267	29747359
Ech1	ENSMUSG00000053898	7	29610236	29617266
Lgals4	ENSMUSG00000053964	7	29618813	29626722
Nfkbib	ENSMUSG00000030595	7	29543270	29552531
Lgals7	ENSMUSG00000053522	7	29648872	29651303
Sirt2	ENSMUSG00000015149	7	29551754	29573684
Rinl	ENSMUSG00000051735	7	29573988	29583982
Hnrnpl	ENSMUSG00000015165	7	29593560	29607285
Eif3k	ENSMUSG00000053565	7	29756392	29766883
Map4k1	ENSMUSG00000037337	7	29767073	29788298
Ryr1	ENSMUSG00000030592	7	29788359	29910170
Gm16799	ENSMUSG00000087096	7	29856622	29866153
Mir1963	ENSMUSG00000089219	7	29868655	29868713
Rasgrp4	ENSMUSG00000030589	7	29919873	29938980
Gm16282	ENSMUSG00000090009	7	29923459	29925331
Fam98c	ENSMUSG00000030590	7	29937530	29941253
1110035H17Rik	ENSMUSG00000050633	7	29940699	29941937
Spred3	ENSMUSG00000037239	7	29943848	29954860
Catsperg1	ENSMUSG00000049676	7	29966340	29999054
Ggn	ENSMUSG00000031493	7	29955239	29958952
Psmd8	ENSMUSG00000030591	7	29959207	29965692
Kcnk6	ENSMUSG00000046410	7	30006947	30017541
Yif1b	ENSMUSG00000030588	7	30023348	30032612
2200002D01Rik	ENSMUSG00000030587	7	30031580	30033451
Spint2	ENSMUSG00000074227	7	30041350	30066996
Ppp1r14a	ENSMUSG00000037166	7	30074339	30078409
Dpf1	ENSMUSG00000030584	7	30088970	30102607
Sipa1l3	ENSMUSG00000030583	7	30105397	30290479
Gm17113	ENSMUSG00000061115	7	29968055	29968402
4932431P20Rik	ENSMUSG00000074224	7	30304224	30323076
4930432E11Rik	ENSMUSG00000046958	7	30345534	30360497
6330444E15Rik	ENSMUSG00000051976	7	30363894	30364853
n-R5s153	ENSMUSG00000065385	7	30442180	30442295
Catsperg2	ENSMUSG00000049123	7	30482238	30512051
U6	ENSMUSG00000065659	7	30522337	30522443
Zfp84	ENSMUSG00000046185	7	30553571	30564840
Mir1964	ENSMUSG00000089139	7	30558313	30558395
Zfp30	ENSMUSG00000047473	7	30569017	30579721
Zfp790	ENSMUSG00000011427	7	30601091	30617061
Zfp940	ENSMUSG00000050855	7	30618639	30638688
Gm17199	ENSMUSG00000090331	7	30640659	30641074
Gm17551	ENSMUSG00000092015	7	30638104	30644044
Zfp420	ENSMUSG00000058402	7	30644998	30700678
Gm10169	ENSMUSG00000083669	7	30750237	30750584
Zfp27	ENSMUSG00000062040	7	30678352	30691591
Zfp74	ENSMUSG00000059975	7	30715834	30739108
C230062I16Rik	ENSMUSG00000063623	7	30738640	30741011
Zfp568	ENSMUSG00000074221	7	30768974	30813301
Zfp14	ENSMUSG00000053985	7	30823072	30829753
Gm10989	ENSMUSG00000078770	7	30839755	30840586
Zfp82	ENSMUSG00000058447	7	30841057	30857842
Zfp566	ENSMUSG00000078768	7	30862356	30875529
Zfp260	ENSMUSG00000049421	7	30879796	30892641
AC164703.1	ENSMUSG00000093495	7	30885859	30885954
Zfp382	ENSMUSG00000074220	7	30906961	30919684
Gm10988	ENSMUSG00000078767	7	30936893	30937764
Zfp146	ENSMUSG00000037029	7	30946293	30954746
Gm5113	ENSMUSG00000066647	7	30954894	30965228
Rps12-ps5	ENSMUSG00000081565	7	31048282	31048670
Gm17440	ENSMUSG00000092079	7	30983649	30985908
Cox7a1	ENSMUSG00000074218	7	30969190	30971047
Capns1	ENSMUSG00000001794	7	30971961	30980183
Tbcb	ENSMUSG00000006095	7	31009150	31017291
Polr2i	ENSMUSG00000019738	7	31016967	31018409
Ovol3	ENSMUSG00000056028	7	31018512	31020744
Wdr62	ENSMUSG00000037020	7	31025157	31065438
Thap8	ENSMUSG00000013928	7	31065113	31075256
Clip3	ENSMUSG00000013921	7	31076691	31093386
Alkbh6	ENSMUSG00000042831	7	31093736	31099323
AI428936	ENSMUSG00000019737	7	31099826	31104065
Sdhaf1	ENSMUSG00000074211	7	31106430	31107394
E130208F15Rik	ENSMUSG00000074210	7	31106759	31108491
AC149067.1	ENSMUSG00000093571	7	31096544	31096914
Lrfn3	ENSMUSG00000036957	7	31140533	31147791
U2	ENSMUSG00000064982	7	31141751	31141943
Kirrel2	ENSMUSG00000036915	7	31232553	31242709
Tyrobp	ENSMUSG00000030579	7	31198807	31202596
Hcst	ENSMUSG00000064109	7	31202732	31204873
Nfkbid	ENSMUSG00000036931	7	31206751	31213765
Aplp1	ENSMUSG00000006651	7	31220001	31230580
Nphs1	ENSMUSG00000006649	7	31243334	31272242
Nphs1as	ENSMUSG00000087009	7	31247183	31250610
Rgs9bp	ENSMUSG00000056043	7	36364017	36370601
Gm17327	ENSMUSG00000090311	7	35009774	35015255
Pdcd2l	ENSMUSG00000002635	7	34969518	34981680
Gpi1	ENSMUSG00000036427	7	34987141	35015308
4931406P16Rik	ENSMUSG00000066571	7	35021726	35098570
Gm6096	ENSMUSG00000078380	7	35036057	35036512
Lsm14a	ENSMUSG00000066568	7	35129665	35174559
Kctd15	ENSMUSG00000030499	7	35424033	35440528
Chst8	ENSMUSG00000060402	7	35459487	35597730
Pepd	ENSMUSG00000063931	7	35697398	35829729
Cebpg	ENSMUSG00000056216	7	35831441	35841522
Cebpa	ENSMUSG00000034957	7	35904312	35906945
Slc7a10	ENSMUSG00000030495	7	35971404	35989917
Lrp3	ENSMUSG00000001802	7	35984852	36000389
Gpatch1	ENSMUSG00000063808	7	36061555	36103459
Rhpn2	ENSMUSG00000030494	7	36119194	36177304
C230052I12Rik	ENSMUSG00000030493	7	36177294	36181836
Gm12782	ENSMUSG00000081714	7	34565836	34566562
Gm12768	ENSMUSG00000081510	7	34629955	34630713
Gm12777	ENSMUSG00000084296	7	34638075	34639837
Gm12757	ENSMUSG00000081317	7	34664314	34665113
Gm12765	ENSMUSG00000083085	7	34722280	34723256
Gm12759	ENSMUSG00000083942	7	34743824	34745005
Gm12773	ENSMUSG00000081962	7	34782018	34782604
Gm12755	ENSMUSG00000081768	7	34783031	34791480
Gm12760	ENSMUSG00000083434	7	34821466	34822451
Gm12779	ENSMUSG00000080947	7	34853574	34853765
Gm12778	ENSMUSG00000081491	7	34960731	34961063
Gm12783	ENSMUSG00000081161	7	34961777	34965023
Gm12762	ENSMUSG00000086526	7	35015439	35019094
Gm12758	ENSMUSG00000085105	7	35019396	35025226
Gm12774	ENSMUSG00000082684	7	35168678	35169093
Gm12764	ENSMUSG00000086184	7	35173684	35179798
Gm12766	ENSMUSG00000085124	7	35223156	35305904
Gm12780	ENSMUSG00000081863	7	35280440	35281084
Gm12784	ENSMUSG00000086631	7	35332225	35341223
Gm12781	ENSMUSG00000085923	7	35438203	35445435
Gm12756	ENSMUSG00000087127	7	35450432	35459018
Ccdc123	ENSMUSG00000023072	7	36182054	36223708
Abpz	ENSMUSG00000046438	7	34522209	34524331
Gm12769	ENSMUSG00000078753	7	34528811	34530122
Abpg	ENSMUSG00000066586	7	34728021	34730059
Abpb	ENSMUSG00000066584	7	34796951	34798961
Abpa	ENSMUSG00000066583	7	34806502	34807900
Gm12776	ENSMUSG00000078752	7	34880450	34885856
Wtip	ENSMUSG00000036459	7	34894562	34918287
Uba2	ENSMUSG00000052997	7	34925708	34954618
Pdcd5	ENSMUSG00000030417	7	36427001	36432540
Dpy19l3	ENSMUSG00000043671	7	36470184	36539473
Ankrd27	ENSMUSG00000034867	7	36371266	36424256
Slc7a9	ENSMUSG00000030492	7	36234056	36251055
Tdrd12	ENSMUSG00000030491	7	36254117	36322764
Nudt19	ENSMUSG00000034875	7	36332204	36341323
SNORA17	ENSMUSG00000077469	7	35728875	35729004
5S_rRNA	ENSMUSG00000088799	7	35886841	35886959
U7	ENSMUSG00000089086	7	34562609	34562673
BX537299.1	ENSMUSG00000077044	7	34593136	34593245
AC150683.1	ENSMUSG00000093715	7	36019779	36019847
AC149058.1	ENSMUSG00000093153	7	35866929	35866998
SNORA17	ENSMUSG00000088307	7	36002254	36002379
9530052E02Rik	ENSMUSG00000085270	8	11007850	11054541
E230013L22Rik	ENSMUSG00000090605	8	11477929	11480241
Col4a2	ENSMUSG00000031503	8	11312805	11449287
Gm15418	ENSMUSG00000085573	8	11187755	11204503
Gm15419	ENSMUSG00000084783	8	11399186	11417892
1700128E19Rik	ENSMUSG00000031510	8	11713264	11722620
Gm15875	ENSMUSG00000086500	8	11838978	11840400
Rab20	ENSMUSG00000031504	8	11453392	11478638
Carkd	ENSMUSG00000031505	8	11497602	11513284
Cars2	ENSMUSG00000056228	8	11514021	11550771
Ing1	ENSMUSG00000045969	8	11556066	11563250
Ankrd10	ENSMUSG00000031508	8	11611583	11635754
1700016D06Rik	ENSMUSG00000031509	8	11654921	11678750
Arhgef7	ENSMUSG00000031511	8	11728105	11835219
1700018L24Rik	ENSMUSG00000031512	8	11840474	11855761
A230072I06Rik	ENSMUSG00000074473	8	12278819	12280657
Gm5607	ENSMUSG00000047935	8	12385771	12436729
Spaca7	ENSMUSG00000010435	8	12573049	12600738
Tubgcp3	ENSMUSG00000000759	8	12614277	12672248
Myo16	ENSMUSG00000039057	8	10272572	10634741
3930402G23Rik	ENSMUSG00000038917	8	10924427	10928457
Irs2	ENSMUSG00000038894	8	10986980	11008458
Col4a1	ENSMUSG00000031502	8	11198423	11312826
7SK	ENSMUSG00000089234	8	12356153	12356469
AC102525.1	ENSMUSG00000092656	8	12396403	12396488
4931415C17Rik	ENSMUSG00000054910	8	12672186	12679229
Gm15348	ENSMUSG00000074469	8	12706944	12719127
Atp11a	ENSMUSG00000031441	8	12757014	12868728
AC127677.1	ENSMUSG00000088641	8	12666095	12666198
Mcf2l	ENSMUSG00000031442	8	12873806	13020905
Gm15350	ENSMUSG00000084780	8	12828335	12833865
Gm15347	ENSMUSG00000085465	8	12860358	12877344
Gm15353	ENSMUSG00000079146	8	12879878	12883726
Gm15351	ENSMUSG00000086770	8	12899146	12915758
Gm15349	ENSMUSG00000082682	8	12971826	12972029
Gm15352	ENSMUSG00000081951	8	13021941	13022210
F7	ENSMUSG00000031443	8	13026034	13035809
F10	ENSMUSG00000031444	8	13037308	13056676
Proz	ENSMUSG00000031445	8	13060908	13075006
Gm17023	ENSMUSG00000091443	8	13076077	13082740
Pcid2	ENSMUSG00000038542	8	13077189	13105459
Gm17022	ENSMUSG00000091784	8	13086517	13087428
Cul4a	ENSMUSG00000031446	8	13105621	13147940
Fat1	ENSMUSG00000070047	8	46035562	46137611
Mtnr1a	ENSMUSG00000054764	8	46154491	46173710
F11	ENSMUSG00000031645	8	46326524	46347385
Klkb1	ENSMUSG00000031640	8	46354796	46380213
Cyp4v3	ENSMUSG00000079057	8	46355025	46418570
Fam149a	ENSMUSG00000070044	8	46422071	46467645
Tlr3	ENSMUSG00000031639	8	46481019	46495962
Sorbs2	ENSMUSG00000031626	8	46593148	46913259
Pdlim3	ENSMUSG00000031636	8	46970839	47004900
Ccdc110	ENSMUSG00000071104	8	47019973	47029499
1700029J07Rik	ENSMUSG00000071103	8	47038960	47060606
Ufsp2	ENSMUSG00000031634	8	47060882	47082312
Ankrd37	ENSMUSG00000050914	8	47082256	47085221
Lrp2bp	ENSMUSG00000031637	8	47084657	47114831
Snx25	ENSMUSG00000038291	8	47118615	47237513
4933411K20Rik	ENSMUSG00000031631	8	47237125	47280944
Slc25a4	ENSMUSG00000031633	8	47292151	47296638
Gm10313	ENSMUSG00000071102	8	47340031	47341032
Helt	ENSMUSG00000047171	8	47377404	47380025
Acsl1	ENSMUSG00000018796	8	47556395	47621405
Mlf1ip	ENSMUSG00000031629	8	47637409	47665361
Ccdc111	ENSMUSG00000038225	8	47660933	47702566
Casp3	ENSMUSG00000031628	8	47702803	47724060
Irf2	ENSMUSG00000031627	8	47825099	47932812
Gm2366	ENSMUSG00000091546	8	46102570	46107739
Gm16675	ENSMUSG00000085052	8	47816326	47824869
AY512931	ENSMUSG00000066158	8	46146056	46150772
Gm16351	ENSMUSG00000084954	8	46673266	46682098
D330022K07Rik	ENSMUSG00000085440	8	46808679	46904651
Gm16352	ENSMUSG00000084994	8	46808682	46823393
Gm15878	ENSMUSG00000087542	8	47034966	47035271
Gm15634	ENSMUSG00000086279	8	47237964	47241454
Actg-ps1	ENSMUSG00000074978	8	47314920	47315327
U6atac	ENSMUSG00000080378	8	46949832	46949957
7SK	ENSMUSG00000088629	8	47192613	47192885
SNORA17	ENSMUSG00000077499	8	46666970	46667101
U6	ENSMUSG00000089561	8	47357405	47357501
AC114558.1	ENSMUSG00000078036	8	47166242	47166337
AC156551.1	ENSMUSG00000092897	8	47315148	47315231
Enpp6	ENSMUSG00000038173	8	48072279	48180249
Stox2	ENSMUSG00000038143	8	48265402	48437702
Gm10083	ENSMUSG00000060559	8	48498483	48500713
4930448N21Rik	ENSMUSG00000086634	8	48379626	48531716
4930579M01Rik	ENSMUSG00000086190	8	48112159	48123531
AC102862.1	ENSMUSG00000092710	8	48525772	48525905
AC102862.2	ENSMUSG00000093558	8	48547620	48547815
D030016E14Rik	ENSMUSG00000038102	8	48575469	48618824
Rwdd4a	ENSMUSG00000031568	8	48619018	48638179
Ing2	ENSMUSG00000063049	8	48752532	48760910
AA386476	ENSMUSG00000074357	8	48760745	48762409
Cdkn2aip	ENSMUSG00000038069	8	48794698	48799285
Gm8623	ENSMUSG00000062458	8	48717683	48718118
n-R5s96	ENSMUSG00000064508	8	48804600	48804723
Aga	ENSMUSG00000031521	8	54597080	54608776
Neil3	ENSMUSG00000039396	8	54672221	54724419
Gm9892	ENSMUSG00000052825	8	53281415	53282410
U7	ENSMUSG00000089068	8	54579207	54579268
[truncated: 1,559 more rows]

## Sheet: longevityIgG3-PT
Gene Name	Ensembl Gene ID	Chromosome	Start	End
Eya1	ENSMUSG00000025932	1	14159035	14300281
Msc	ENSMUSG00000025930	1	14743427	14746047
Gm9947	ENSMUSG00000054493	1	14745535	14748454
Trpa1	ENSMUSG00000032769	1	14862729	14908943
Gm10566	ENSMUSG00000073737	1	15258880	15259878
Kcnb2	ENSMUSG00000092083	1	15277340	15704376
Kcnb2	ENSMUSG00000090498	1	15702384	15706448
Terf1	ENSMUSG00000025925	1	15795739	15833551
Gm106	ENSMUSG00000032719	1	15843943	15882803
4930444P10Rik	ENSMUSG00000067795	1	16056060	16083406
Rpl7	ENSMUSG00000043716	1	16091376	16094743
Rdh10	ENSMUSG00000025921	1	16095855	16123815
Smt3h2-ps4	ENSMUSG00000081201	1	14829950	14830237
Rpl5-ps1	ENSMUSG00000082193	1	14855153	14856046
SNORA17	ENSMUSG00000077377	1	15747913	15748044
SNORA17	ENSMUSG00000088159	1	15009121	15009240
SNORA17	ENSMUSG00000088829	1	15676016	15676127
7SK	ENSMUSG00000088943	1	15869611	15869913
Pi15	ENSMUSG00000067780	1	17591982	17621019
Crispld1	ENSMUSG00000025776	1	17717126	17756425
Crisp4	ENSMUSG00000025774	1	18105272	18135983
Defb18	ENSMUSG00000073735	1	18226554	18227524
Defb41	ENSMUSG00000067773	1	18241061	18255219
Gm15386	ENSMUSG00000089923	1	18250605	18255161
Tfap2d	ENSMUSG00000042596	1	19093103	19156427
Tfap2b	ENSMUSG00000025927	1	19198995	19228815
Gm16070	ENSMUSG00000085125	1	17666108	17717727
Defb44-ps	ENSMUSG00000070977	1	18200134	18213645
Gm15825	ENSMUSG00000089787	1	19053380	19094921
Gm10075	ENSMUSG00000060128	1	19143391	19144047
SNORA17	ENSMUSG00000088800	1	18959843	18959914
SNORD29	ENSMUSG00000084668	1	19503936	19504000
Prim2	ENSMUSG00000026134	1	33510656	33726631
1700001G17Rik	ENSMUSG00000044744	1	33726688	33727557
Rab23	ENSMUSG00000004768	1	33776727	33799409
Bag2	ENSMUSG00000042215	1	33802329	33814639
Zfp451	ENSMUSG00000042197	1	33817317	33871440
Bend6	ENSMUSG00000042182	1	33908897	33964661
Dst	ENSMUSG00000026131	1	33965125	34365495
Gm11158	ENSMUSG00000079617	1	34428991	34460294
Ccdc115	ENSMUSG00000042111	1	34493516	34496517
Imp4	ENSMUSG00000026127	1	34496696	34502581
Ptpn18	ENSMUSG00000026126	1	34516591	34532499
Prss39	ENSMUSG00000026125	1	34555275	34559907
Cfc1	ENSMUSG00000026124	1	34592493	34601156
Prss40	ENSMUSG00000037529	1	34600820	34617788
1700101I19Rik	ENSMUSG00000045815	1	34636069	34636458
Fam123c	ENSMUSG00000045174	1	34636538	34647783
Arhgef4	ENSMUSG00000037509	1	34778769	34870154
Fam168b	ENSMUSG00000037503	1	34870064	34899910
Plekhb2	ENSMUSG00000026123	1	34906804	34936425
Gm16750	ENSMUSG00000085306	1	34222701	34235118
Gm15455	ENSMUSG00000081402	1	33892744	33895759
C230030N03Rik	ENSMUSG00000089955	1	34735033	34781146
C230030N03Rik	ENSMUSG00000046858	1	34779929	34780877
SNORA17	ENSMUSG00000077231	1	35235801	35235929
Mir5103	ENSMUSG00000092852	1	34489966	34490044
U6	ENSMUSG00000084506	1	34038255	34038347
Pax3	ENSMUSG00000004872	1	78097842	78193709
Sgpp2	ENSMUSG00000032908	1	78306921	78416861
Farsb	ENSMUSG00000026245	1	78414533	78485434
BC035947	ENSMUSG00000090486	1	78494381	78508538
Mogat1	ENSMUSG00000012187	1	78507566	78534748
Acsl3	ENSMUSG00000032883	1	78654400	78703562
Utp14b	ENSMUSG00000079470	1	78654613	78664163
Kcne4	ENSMUSG00000047330	1	78813502	78816599
Gm5830	ENSMUSG00000072978	1	78964212	78964654
Scg2	ENSMUSG00000050711	1	79431244	79436665
Ap1s3	ENSMUSG00000054702	1	79603451	79668547
SNORA17	ENSMUSG00000077782	1	79510314	79510439
U1	ENSMUSG00000065215	1	77894858	77895021
Wdfy1	ENSMUSG00000073643	1	79698837	79772718
Mrpl44	ENSMUSG00000026248	1	79772593	79778020
Dpp10	ENSMUSG00000036815	1	125228716	125942136
Actr3	ENSMUSG00000026341	1	127289483	127332067
Slc35f5	ENSMUSG00000026342	1	127457593	127492261
Gpr39	ENSMUSG00000026343	1	127573572	127770439
Lypd1	ENSMUSG00000026344	1	127764199	127809678
Nckap5	ENSMUSG00000049690	1	127810197	128727376
Gm10543	ENSMUSG00000073586	1	125941400	125942989
U6	ENSMUSG00000065340	1	126387433	126387536
Pla2g4a	ENSMUSG00000056220	1	151676748	151808420
Ptgs2	ENSMUSG00000032487	1	151947254	151955140
Pdc	ENSMUSG00000006007	1	152166547	152181035
BC003331	ENSMUSG00000006010	1	152208435	152240210
Tpr	ENSMUSG00000006005	1	152239968	152297065
Prg4	ENSMUSG00000006014	1	152296542	152313295
Hmcn1	ENSMUSG00000066842	1	152410657	152840565
Gm17311	ENSMUSG00000091113	1	152006173	152012078
7530420F21Rik	ENSMUSG00000084952	1	151922003	151947004
Gm15453	ENSMUSG00000081535	1	152112665	152113129
Ska2l-ps	ENSMUSG00000057399	1	152396447	152396809
RP23-454G7.1	ENSMUSG00000093650	1	152472395	152630629
U6	ENSMUSG00000088167	1	151554507	151554612
U6	ENSMUSG00000065624	1	152909134	152909240
U2	ENSMUSG00000088498	1	153107954	153108044
n-R5s219	ENSMUSG00000077516	1	151688660	151688791
Y_RNA	ENSMUSG00000089221	1	153160677	153160758
n-R5s218	ENSMUSG00000084532	1	151581880	151581988
Acbd6	ENSMUSG00000033701	1	157405250	157534363
Lhx4	ENSMUSG00000026468	1	157545166	157589250
Qsox1	ENSMUSG00000033684	1	157625285	157660013
Cep350	ENSMUSG00000033671	1	157692096	157820020
Tor1aip1	ENSMUSG00000026466	1	157851729	157883610
Tor1aip2	ENSMUSG00000050565	1	157882533	157915991
Tor1aip2	ENSMUSG00000079252	1	157882856	157900866
Fam163a	ENSMUSG00000015484	1	157923096	158135156
Nphs2	ENSMUSG00000026602	1	158240858	158258166
9430070O13Rik	ENSMUSG00000026601	1	158295060	158330121
Gm2000	ENSMUSG00000078193	1	158296169	158296613
Soat1	ENSMUSG00000026600	1	158358239	158404459
Abl2	ENSMUSG00000026596	1	158488917	158579699
Tor3a	ENSMUSG00000060519	1	158583748	158604487
Fam20b	ENSMUSG00000033557	1	158608676	158649132
Ralgps2	ENSMUSG00000026594	1	158734297	158869757
Angptl1	ENSMUSG00000033544	1	158768693	158791209
1700057K13Rik	ENSMUSG00000026592	1	159029279	159038811
Rasal2	ENSMUSG00000070565	1	159065314	159342726
Gm5532	ENSMUSG00000073535	1	157367303	157374241
Tdrd5	ENSMUSG00000060985	1	158185426	158233795
Gm10031	ENSMUSG00000057808	1	158454362	158455283
Gm15428	ENSMUSG00000046057	1	158723643	158723975
U2	ENSMUSG00000077419	1	157801704	157801852
Gm6058	ENSMUSG00000087632	1	159314062	159314460
2810025M15Rik	ENSMUSG00000049881	1	159342483	159350366
BC026585	ENSMUSG00000033488	1	159388711	159419191
Gm15486	ENSMUSG00000087093	1	159428006	159441852
Sec16b	ENSMUSG00000026589	1	159436859	159498556
Fmo4	ENSMUSG00000026692	1	164724014	164744103
Fmo1	ENSMUSG00000040181	1	164759692	164796679
Fmo2	ENSMUSG00000040170	1	164804448	164828857
Fmo3	ENSMUSG00000026691	1	164883933	164914659
4921528O07Rik	ENSMUSG00000071890	1	164954433	165015801
Prrx1	ENSMUSG00000026586	1	165175247	165243841
Gorab	ENSMUSG00000040124	1	165315040	165333772
Mettl11b	ENSMUSG00000040113	1	165632388	165655363
Kifap3	ENSMUSG00000026585	1	165709714	165847240
Scyl3	ENSMUSG00000026584	1	165859231	165885257
BC055324	ENSMUSG00000041406	1	165876124	165924927
2810422O20Rik	ENSMUSG00000041396	1	165925020	165927374
Sele	ENSMUSG00000026582	1	165978365	165987808
Sell	ENSMUSG00000026581	1	165992207	166010916
Selp	ENSMUSG00000026580	1	166045395	166080157
F5	ENSMUSG00000026579	1	166081969	166150408
Slc19a2	ENSMUSG00000040918	1	166179177	166195516
4930455F23Rik	ENSMUSG00000026578	1	166205716	166217978
Blzf1	ENSMUSG00000026577	1	166219931	166237620
Nme7	ENSMUSG00000026575	1	166243010	166334805
Atp1b1	ENSMUSG00000026576	1	166367398	166388486
Dpt	ENSMUSG00000026574	1	166726863	166754397
Gm17698	ENSMUSG00000090335	1	165231921	165233751
Gm16608	ENSMUSG00000086116	1	166433438	166445013
Gm20471	ENSMUSG00000092188	1	165210487	165217176
Gm2343	ENSMUSG00000089700	1	165659700	165660741
Gm16587	ENSMUSG00000090081	1	166073563	166076497
Gm16548	ENSMUSG00000086593	1	166078722	166082348
Gm16588	ENSMUSG00000089790	1	166096710	166097064
U6atac	ENSMUSG00000088951	1	165332414	165332521
SNORA17	ENSMUSG00000077608	1	164984949	164985082
SNORA40	ENSMUSG00000089174	1	165048358	165048479
Xcl1	ENSMUSG00000026573	1	166861775	166865658
Copa	ENSMUSG00000026553	1	174012660	174052461
Pex19	ENSMUSG00000003464	1	174056886	174066624
Dcaf8	ENSMUSG00000026554	1	174078146	174126524
Pea15a	ENSMUSG00000013698	1	174126859	174136935
Casq1	ENSMUSG00000007122	1	174140025	174150026
Atp1a4	ENSMUSG00000007107	1	174153644	174188545
Igsf8	ENSMUSG00000038034	1	174191772	174249972
Atp1a2	ENSMUSG00000007097	1	174201840	174228195
Kcnj9	ENSMUSG00000038026	1	174251164	174259394
Kcnj10	ENSMUSG00000044708	1	174271341	174304216
Pigm	ENSMUSG00000050229	1	174306662	174314230
Slamf9	ENSMUSG00000026548	1	174405489	174408706
Igsf9	ENSMUSG00000037995	1	174411919	174429009
Tagln2	ENSMUSG00000026547	1	174430178	174437511
Ccdc19	ENSMUSG00000026546	1	174451175	174476001
Vsig8	ENSMUSG00000049598	1	174486069	174493848
Slamf8	ENSMUSG00000053318	1	174511508	174520699
Fcrl6	ENSMUSG00000070504	1	174526771	174532682
Dusp23	ENSMUSG00000026544	1	174560900	174563105
Crp	ENSMUSG00000037942	1	174628187	174630097
Apcs	ENSMUSG00000026542	1	174824093	174825185
Olfr16	ENSMUSG00000037924	1	174886899	174887948
Olfr1408	ENSMUSG00000062527	1	175060331	175061367
Olfr1406	ENSMUSG00000058981	1	175113573	175114635
Olfr218	ENSMUSG00000046643	1	175133489	175134430
Olfr1404	ENSMUSG00000049456	1	175145738	175146771
Fcer1a	ENSMUSG00000005339	1	175151402	175157360
Olfr418-ps1	ENSMUSG00000049605	1	175200278	175201268
Gm11062	ENSMUSG00000079180	1	175204592	175207853
Darc	ENSMUSG00000037872	1	175262017	175263634
Cadm3	ENSMUSG00000005338	1	175264385	175297826
Aim2	ENSMUSG00000037860	1	175281010	175396171
Gm4955	ENSMUSG00000037849	1	175398640	175421172
BC094916	ENSMUSG00000070501	1	175449848	175466088
Pydc4	ENSMUSG00000073491	1	175497204	175529405
Pyhin1	ENSMUSG00000043263	1	175560990	175578059
Pydc3	ENSMUSG00000066677	1	175604042	175628523
AI607873	ENSMUSG00000073490	1	175653814	175671878
Ifi204	ENSMUSG00000073489	1	175677424	175697050
Mndal	ENSMUSG00000090272	1	175787352	175872622
Mnda	ENSMUSG00000026536	1	175826486	175843053
Ifi203	ENSMUSG00000039997	1	175850538	175872803
Ifi202b	ENSMUSG00000026535	1	175892700	175912975
Ifi205	ENSMUSG00000054203	1	175942129	175961886
Olfr433	ENSMUSG00000045381	1	175972064	175973067
Olfr432	ENSMUSG00000047048	1	175980506	175981444
Olfr430	ENSMUSG00000050134	1	175999431	176000384
Olfr429	ENSMUSG00000049528	1	176019169	176020111
Gm10171	ENSMUSG00000089803	1	174074403	174075032
Gm17224	ENSMUSG00000092085	1	174143152	174143811
4933439K11Rik	ENSMUSG00000085184	1	174468264	174488260
Olfr1407-ps1	ENSMUSG00000066680	1	175080262	175080503
Gm16340	ENSMUSG00000090222	1	175705968	175732851
7SK	ENSMUSG00000088813	1	174614646	174614972
SNORA17	ENSMUSG00000077252	1	174866343	174866465
U6	ENSMUSG00000070182	1	174773665	174773769
Olfr427	ENSMUSG00000059371	1	176029591	176030538
Olfr231	ENSMUSG00000046486	1	176047222	176048145
Olfr424	ENSMUSG00000051528	1	176066877	176067824
Olfr421	ENSMUSG00000091950	1	176081612	176082661
Olfr420	ENSMUSG00000055033	1	176088853	176089898
Spna1	ENSMUSG00000026532	1	176102907	176178581
Olfr419	ENSMUSG00000050788	1	176180020	176181107
1810030J14Rik	ENSMUSG00000026531	1	176260649	176263004
Olfr417	ENSMUSG00000066672	1	176299050	176299979
Olfr248	ENSMUSG00000059503	1	176321177	176322186
Olfr414	ENSMUSG00000051509	1	176360561	176361515
Olfr220	ENSMUSG00000066671	1	176378756	176379733
Fmn2	ENSMUSG00000028354	1	176431956	176752848
Grem2	ENSMUSG00000050069	1	176763916	176851950
Rgs7	ENSMUSG00000026527	1	176989867	177421261
Fh1	ENSMUSG00000026526	1	177530505	177555766
Kmo	ENSMUSG00000039783	1	177550512	177592247
Opn3	ENSMUSG00000026525	1	177592552	177622907
Chml	ENSMUSG00000078185	1	177616619	177618484
Wdr64	ENSMUSG00000026523	1	177628724	177745865
Exo1	ENSMUSG00000039748	1	177810909	177841527
Pld5	ENSMUSG00000055214	1	177892437	178205443
B020018G12Rik	ENSMUSG00000078184	1	177907908	177909245
U6	ENSMUSG00000065666	1	177834676	177834782
U2	ENSMUSG00000077794	1	177730645	177730820
Cep170	ENSMUSG00000057335	1	178663784	178744198
U6	ENSMUSG00000087875	1	178630748	178630855
Mir350	ENSMUSG00000065573	1	178702456	178702554
Sdccag8	ENSMUSG00000026504	1	178744791	178950568
7SK	ENSMUSG00000084749	1	178724087	178724351
AC144905.1	ENSMUSG00000093132	1	178809965	178810044
Akt3	ENSMUSG00000019699	1	178950204	179188334
Gm15423	ENSMUSG00000087082	1	178858130	178862842
Zfp238	ENSMUSG00000063659	1	179374792	179380891
Gm17407	ENSMUSG00000078909	1	179359178	179373401
1700016C15Rik	ENSMUSG00000015962	1	179659945	179683455
Adss	ENSMUSG00000015961	1	179693093	179726642
Gm16585	ENSMUSG00000089657	1	179716987	179717596
Gm16432	ENSMUSG00000091476	1	179921566	179978422
Gm16432	ENSMUSG00000066667	1	179921567	180102835
Pppde1	ENSMUSG00000026502	1	180117548	180182729
Gm9982	ENSMUSG00000055831	1	180186234	180187426
Fam36a	ENSMUSG00000026500	1	180249261	180252824
Hnrnpu	ENSMUSG00000039630	1	180253205	180267928
Gm17323	ENSMUSG00000090908	1	180279677	180279831
Efcab2	ENSMUSG00000026495	1	180336012	180413378
Kif26b	ENSMUSG00000026494	1	180459256	180862986
4930527J03Rik	ENSMUSG00000070489	1	180206224	180206770
B230369F24Rik	ENSMUSG00000086350	1	180243459	180248680
Gm16586	ENSMUSG00000089788	1	180251239	180254302
U6	ENSMUSG00000065826	1	179958164	179958270
U6	ENSMUSG00000064954	1	180320950	180321055
Smyd3	ENSMUSG00000055067	1	180882091	181448172
Gm16564	ENSMUSG00000089713	1	180828713	180847745
U1	ENSMUSG00000064967	1	180567036	180567202
Gm5561	ENSMUSG00000075392	1	181450388	181451039
Tfb2m	ENSMUSG00000026492	1	181458186	181476398
Cnst	ENSMUSG00000038949	1	181476501	181557609
Gm15480	ENSMUSG00000082395	1	181468548	181469066
Sccpdh	ENSMUSG00000038936	1	181598341	181617320
Gm1305	ENSMUSG00000087236	1	181625428	181675316
Ahctf1	ENSMUSG00000026491	1	181675025	181733811
Gm10518	ENSMUSG00000073486	1	181733507	181734807
Cdc42bpa	ENSMUSG00000026490	1	181890603	182095734
Adck3	ENSMUSG00000026489	1	182095369	182129733
Psen2	ENSMUSG00000010609	1	182157135	182193569
Gm5069	ENSMUSG00000055676	1	182257102	182260681
Itpkb	ENSMUSG00000038855	1	182260607	182354933
6330403A02Rik	ENSMUSG00000053963	1	182362518	182413598
Parp1	ENSMUSG00000026496	1	182499086	182531384
Lin9	ENSMUSG00000058729	1	182571498	182620816
Mixl1	ENSMUSG00000026497	1	182623174	182627165
Acbd3	ENSMUSG00000026499	1	182656174	182684334
AC167020.1	ENSMUSG00000092967	1	182663926	182664013
H3f3a	ENSMUSG00000060743	1	182730963	182744074
Gm17275	ENSMUSG00000090986	1	182732699	182739614
Gm16067	ENSMUSG00000073485	1	182743907	182746990
U6	ENSMUSG00000084558	1	182762900	182763007
BC031781	ENSMUSG00000038806	1	182781282	182798228
Lefty2	ENSMUSG00000066652	1	182823239	182829234
Pycr2	ENSMUSG00000026520	1	182834405	182838218
Lefty1	ENSMUSG00000038793	1	182865153	182868531
Tmem63a	ENSMUSG00000026519	1	182872475	182905243
Ephx1	ENSMUSG00000038776	1	182906286	182951035
9130409I23Rik	ENSMUSG00000038768	1	182981368	182990798
Nvl	ENSMUSG00000026516	1	183023554	183074288
Cnih4	ENSMUSG00000062169	1	183081062	183099125
Wdr26	ENSMUSG00000038733	1	183103359	183142109
A430110L20Rik	ENSMUSG00000054135	1	183156207	183158621
Cnih3	ENSMUSG00000026514	1	183282759	183390772
2210411M09Rik	ENSMUSG00000085563	1	182882195	182888280
Rpl35a-ps2	ENSMUSG00000081214	1	183172076	183172498
Gm16547	ENSMUSG00000089888	1	183330595	183330887
Gm16539	ENSMUSG00000089927	1	183361854	183362531
Ccdc121	ENSMUSG00000050625	1	183439764	183441582
Dnahc14	ENSMUSG00000047369	1	183669119	183699805
Lbr	ENSMUSG00000004880	1	183745447	183772532
U6	ENSMUSG00000064970	1	183743738	183743831
Gm5533	ENSMUSG00000056699	1	183781739	183783320
Enah	ENSMUSG00000022995	1	183834576	183950111
5S_rRNA	ENSMUSG00000089429	1	183770584	183770699
Ush2a	ENSMUSG00000026609	1	190085902	190788920
Kctd3	ENSMUSG00000026608	1	190794977	190831719
Kcnk2	ENSMUSG00000037624	1	191031816	191167711
Cenpf	ENSMUSG00000026605	1	191464478	191511965
Ptpn14	ENSMUSG00000026604	1	191552147	191700574
Smyd2	ENSMUSG00000026603	1	191704371	191746242
Prox1	ENSMUSG00000010175	1	191941917	191994559
Rps6kc1	ENSMUSG00000089872	1	192524081	192735649
Gm17653	ENSMUSG00000090445	1	191657020	191660499
Gm17566	ENSMUSG00000079045	1	191994175	192041155
mmu-mir-1194	ENSMUSG00000080505	1	191217229	191217349
AC124613.1	ENSMUSG00000093064	1	192306751	192307036
Angel2	ENSMUSG00000026634	1	192748991	192770841
Vash2	ENSMUSG00000037568	1	192771527	192803175
Mfsd7b	ENSMUSG00000066595	1	192829711	192850069
1700022P22Rik	ENSMUSG00000057072	1	192860701	192866821
Tatdn3	ENSMUSG00000026632	1	192869705	192886811
Nsl1	ENSMUSG00000062510	1	192886891	192908437
Batf3	ENSMUSG00000026630	1	192922293	192932822
Fam71a	ENSMUSG00000091017	1	192986463	192988696
Atf3	ENSMUSG00000026628	1	192994175	193007219
7SK	ENSMUSG00000088461	1	193020785	193020892
Nenf	ENSMUSG00000037499	1	193130668	193142073
Tmem206	ENSMUSG00000026627	1	193149791	193174793
Ppp2r5a	ENSMUSG00000026626	1	193175860	193220920
Dtl	ENSMUSG00000037474	1	193361244	193399413
Ints7	ENSMUSG00000037461	1	193399642	193446551
D730003I15Rik	ENSMUSG00000073478	1	193048353	193049565
Plxna2	ENSMUSG00000026640	1	196446023	196643063
Cd34	ENSMUSG00000016494	1	196765015	196787486
Cd46	ENSMUSG00000016493	1	196867479	196918442
Cr1l	ENSMUSG00000016481	1	196929983	196957764
Cr2	ENSMUSG00000026616	1	196963005	197002909
A330023F24Rik	ENSMUSG00000073474	1	196802569	196864102
Gm16897	ENSMUSG00000086469	1	196781953	196803153
7SK	ENSMUSG00000084631	1	196684851	196685144
Mir29c	ENSMUSG00000065548	1	196863741	196863828
Mir29b-2	ENSMUSG00000065412	1	196863234	196863314
AC109145.1	ENSMUSG00000080633	1	197054472	197054592
Mir3962	ENSMUSG00000092633	1	196648195	196648258
Nebl	ENSMUSG00000053702	2	17265536	17653091
H2afb1	ENSMUSG00000062651	2	17918049	17918573
A930004D18Rik	ENSMUSG00000054057	2	17946820	17959364
2810030E01Rik	ENSMUSG00000054074	2	17962303	17970678
Mllt10	ENSMUSG00000026743	2	17976898	18134017
Dnajc1	ENSMUSG00000026740	2	18117281	18314457
Commd3	ENSMUSG00000051154	2	18594011	18597858
Bmi1	ENSMUSG00000026739	2	18598645	18608256
Gm13334	ENSMUSG00000087182	2	18615659	18620664
BC061194	ENSMUSG00000037708	2	18620628	18672040
Pip4k2a	ENSMUSG00000026737	2	18763882	18919753
4930426L09Rik	ENSMUSG00000026736	2	18919970	18921428
Armc3	ENSMUSG00000037683	2	19120745	19231868
Gm13324	ENSMUSG00000085100	2	17480687	17481625
Gm13323	ENSMUSG00000081851	2	17718461	17719611
Gm13329	ENSMUSG00000081116	2	17919868	17920132
Gm13330	ENSMUSG00000085319	2	17954160	17961260
1810059C17Rik	ENSMUSG00000086340	2	17975820	17978240
Gm13351	ENSMUSG00000081619	2	18100656	18101069
Gm13350	ENSMUSG00000083070	2	18170992	18171470
Gm13349	ENSMUSG00000082520	2	18260206	18260616
Gm13354	ENSMUSG00000082742	2	18415996	18416164
Gm13353	ENSMUSG00000081181	2	18489753	18489825
Gm13355	ENSMUSG00000082943	2	18563413	18563729
Gm13352	ENSMUSG00000086882	2	18570712	18570973
Gm20539	ENSMUSG00000092353	2	18664342	18682489
Gm13333	ENSMUSG00000081139	2	18680611	18681391
Gm13332	ENSMUSG00000083281	2	19023328	19024725
4930447M23Rik	ENSMUSG00000087674	2	19265944	19272677
AL928557.1	ENSMUSG00000092814	2	18051079	18051204
U6	ENSMUSG00000064964	2	18080314	18080418
Msrb2	ENSMUSG00000023094	2	19293067	19316603
Ptf1a	ENSMUSG00000026735	2	19367290	19369128
4921504E06Rik	ENSMUSG00000026734	2	19384464	19475541
Gm13344	ENSMUSG00000087103	2	19350731	19353610
Gm13336	ENSMUSG00000085388	2	19363135	19368301
1810010K12Rik	ENSMUSG00000056329	2	19373455	19376622
Gm13345	ENSMUSG00000084160	2	19430717	19430944
Otud1	ENSMUSG00000043415	2	19579689	19582217
Gm13348	ENSMUSG00000086621	2	19555661	19558613
Gm13343	ENSMUSG00000080227	2	19573871	19573975
Gm13346	ENSMUSG00000087246	2	19598338	19607784
Gm13347	ENSMUSG00000083893	2	19598878	19600230
SNORA17	ENSMUSG00000077342	2	19612915	19613046
Etl4	ENSMUSG00000036617	2	19831407	20732340
SNORA32	ENSMUSG00000065644	2	19856490	19856580
Gm13361	ENSMUSG00000083777	2	19887594	19889024
Gm13363	ENSMUSG00000060795	2	19914548	19915069
Gm13360	ENSMUSG00000082164	2	19958723	19959521
Gm13328	ENSMUSG00000081128	2	20156672	20157691
U6	ENSMUSG00000065253	2	20202146	20202252
Gm17171	ENSMUSG00000091457	2	20222444	20246297
Gm13335	ENSMUSG00000085477	2	20342197	20354561
Gm13362	ENSMUSG00000086418	2	20631002	20634861
Arhgap21	ENSMUSG00000036591	2	20769546	20890508
Gm13380	ENSMUSG00000085206	2	20843487	20853016
Gm13375	ENSMUSG00000075514	2	20890681	20891624
Gm13377	ENSMUSG00000086821	2	20966435	21063581
Gm13376	ENSMUSG00000087219	2	21018726	21042286
Enkur	ENSMUSG00000026679	2	21102358	21126992
Thnsl1	ENSMUSG00000048550	2	21127351	21136636
Gpr158	ENSMUSG00000045967	2	21289169	21752174
Gm13378	ENSMUSG00000084071	2	21165732	21166067
Gm13327	ENSMUSG00000085680	2	21263552	21290738
Gm13379	ENSMUSG00000080846	2	21364536	21365156
5S_rRNA	ENSMUSG00000089472	2	21092710	21092840
7SK	ENSMUSG00000089576	2	21119317	21119493
SNORA17	ENSMUSG00000077572	2	21716560	21716682
Myo3a	ENSMUSG00000025716	2	22149130	22473772
Gad2	ENSMUSG00000026787	2	22477725	22549394
Apbb1ip	ENSMUSG00000026786	2	22629614	22731173
Gm13337	ENSMUSG00000081467	2	21989453	21991046
Gm13342	ENSMUSG00000082516	2	22332152	22332358
Gm13341	ENSMUSG00000083863	2	22442811	22443482
Gm13340	ENSMUSG00000083563	2	22443623	22445167
Gm13339	ENSMUSG00000082884	2	22445544	22446053
Gm13338	ENSMUSG00000083453	2	22569031	22569391
1700092C17Rik	ENSMUSG00000085353	2	22611504	22617793
Gm13356	ENSMUSG00000083057	2	22618264	22618598
AL928693.1	ENSMUSG00000092811	2	22522178	22522272
A130006I12Rik	ENSMUSG00000069136	2	22750841	22751256
Gm14441	ENSMUSG00000081861	2	22768813	22769352
Gm17390	ENSMUSG00000090924	2	22786860	22789102
Pdss1	ENSMUSG00000026784	2	22751042	22795786
Abi1	ENSMUSG00000058835	2	22795593	22895761
SNORA42	ENSMUSG00000084625	2	22757908	22758027
Gm13357	ENSMUSG00000083650	2	22874651	22875187
Gm13423	ENSMUSG00000081648	2	23057553	23059203
Gm13422	ENSMUSG00000084098	2	23090756	23091259
Acbd5	ENSMUSG00000026781	2	22923688	22970030
Mastl	ENSMUSG00000026779	2	22971126	23011544
Yme1l1	ENSMUSG00000026775	2	23011889	23054780
4931423N10Rik	ENSMUSG00000026774	2	23062996	23122649
Nxph2	ENSMUSG00000069132	2	23176766	23257493
Gm13331	ENSMUSG00000081519	2	23364380	23364827
Spopl	ENSMUSG00000026771	2	23361740	23427626
Gm757	ENSMUSG00000089953	2	25089996	25092307
2310002J15Rik	ENSMUSG00000036731	2	25094347	25097972
Rnf208	ENSMUSG00000044628	2	25097775	25099782
Ndor1	ENSMUSG00000006471	2	25100340	25111542
Tmem203	ENSMUSG00000078201	2	25110959	25111872
Tprn	ENSMUSG00000048707	2	25118118	25125406
Ssna1	ENSMUSG00000026966	2	25126559	25127958
Anapc2	ENSMUSG00000026965	2	25127998	25141435
Tmem210	ENSMUSG00000026963	2	25143665	25144709
Lrrc26	ENSMUSG00000026961	2	25145435	25146700
Grin1	ENSMUSG00000026959	2	25146701	25174707
Man1b1	ENSMUSG00000036646	2	25187858	25207732
Dpp7	ENSMUSG00000026958	2	25207796	25211879
Uap1l1	ENSMUSG00000026956	2	25215409	25221202
2010317E24Rik	ENSMUSG00000026955	2	25227841	25233733
Entpd2	ENSMUSG00000015085	2	25251394	25256843
Npdc1	ENSMUSG00000015094	2	25254871	25265014
Fut7	ENSMUSG00000036587	2	25278787	25281894
Abca2	ENSMUSG00000026944	2	25284223	25304060
BC029214	ENSMUSG00000047617	2	25310661	25316614
Clic3	ENSMUSG00000015093	2	25312358	25314296
Ptgds	ENSMUSG00000015090	2	25322229	25325566
Lcn12	ENSMUSG00000026943	2	25346365	25349431
C8g	ENSMUSG00000015083	2	25354171	25357239
Fbxw5	ENSMUSG00000015095	2	25356270	25360991
Traf2	ENSMUSG00000026942	2	25373502	25402460
Sh3d2c-ps1	ENSMUSG00000083729	2	23535738	23536641
Gm13382	ENSMUSG00000084075	2	23731550	23731681
Gm13392	ENSMUSG00000083373	2	23763961	23764110
Gm13410	ENSMUSG00000083116	2	24034354	24035837
Gm13409	ENSMUSG00000083172	2	24117350	24121858
Gm13411	ENSMUSG00000085999	2	24177944	24178476
Gm13415	ENSMUSG00000085057	2	24295938	24342375
Gm13418	ENSMUSG00000082307	2	24349588	24350531
Gm13417	ENSMUSG00000085330	2	24401012	24422217
Gm13416	ENSMUSG00000084241	2	24448422	24450033
Gm13459	ENSMUSG00000083973	2	24530221	24530866
Gm13370	ENSMUSG00000084383	2	24841504	24841986
Gm13369	ENSMUSG00000083796	2	24848877	24849872
Gm13387	ENSMUSG00000087028	2	24978123	25000916
E130003G02Rik	ENSMUSG00000085830	2	25146740	25154445
Gm13433	ENSMUSG00000083043	2	25398999	25399238
Hnmt	ENSMUSG00000026986	2	23858430	23904914
Tbpl2	ENSMUSG00000061809	2	23927241	23952115
Il1f8	ENSMUSG00000026985	2	24008681	24016039
Il1f9	ENSMUSG00000044103	2	24041996	24049088
Il1f6	ENSMUSG00000026984	2	24070938	24081222
Il1f5	ENSMUSG00000026983	2	24132474	24138946
Il1f10	ENSMUSG00000046845	2	24146716	24149340
Il1rn	ENSMUSG00000026981	2	24192373	24207014
Psd4	ENSMUSG00000026979	2	24223100	24264702
Pax8	ENSMUSG00000026976	2	24276071	24331119
Cacna1b	ENSMUSG00000004113	2	24459407	24618672
Ehmt1	ENSMUSG00000036893	2	24646289	24775129
Arrdc1	ENSMUSG00000026972	2	24780872	24790772
Zmynd19	ENSMUSG00000026974	2	24805312	24817595
Nelf	ENSMUSG00000006476	2	24909875	24918401
Entpd8	ENSMUSG00000036813	2	24935824	24941239
Noxa1	ENSMUSG00000036805	2	24941187	24950669
Fam166a	ENSMUSG00000026969	2	25074265	25077800
Tubb4b	ENSMUSG00000036752	2	25077680	25080222
Slc34a3	ENSMUSG00000006469	2	25084418	25089884
Wdr85	ENSMUSG00000026975	2	24817920	24827683
4933433C11Rik	ENSMUSG00000036770	2	25067727	25070157
Nrarp	ENSMUSG00000078202	2	25036278	25038850
A830007P12Rik	ENSMUSG00000059555	2	25048486	25052406
Cobra1	ENSMUSG00000013465	2	25055232	25067009
AA543186	ENSMUSG00000091706	2	25182970	25188091
Mrpl41	ENSMUSG00000036850	2	24829637	24830618
Pnpla7	ENSMUSG00000036833	2	24831553	24909577
U6	ENSMUSG00000064919	2	25064143	25064247
AL732528.1	ENSMUSG00000077966	2	24303584	24303678
AL732585.1	ENSMUSG00000092845	2	24910629	24910695
U6	ENSMUSG00000089513	2	24886870	24886973
7SK	ENSMUSG00000088571	2	24456885	24457209
7SK	ENSMUSG00000088368	2	23678573	23678747
AL732525.1	ENSMUSG00000092955	2	24777160	24777415
U6	ENSMUSG00000088171	2	25195171	25195265
AL732525.2	ENSMUSG00000093190	2	24792351	24792476
U6	ENSMUSG00000065798	2	24861672	24861778
Edf1	ENSMUSG00000015092	2	25413367	25417602
Mamdc4	ENSMUSG00000026941	2	25418635	25430365
Phpt1	ENSMUSG00000036504	2	25428950	25430744
Gm996	ENSMUSG00000029419	2	25430936	25435619
B230208H17Rik	ENSMUSG00000015087	2	25438538	25464041
4921530D09Rik	ENSMUSG00000026940	2	25464155	25473198
Tmem141	ENSMUSG00000026939	2	25475587	25477525
Fcna	ENSMUSG00000026938	2	25480186	25483550
Gm13432	ENSMUSG00000083528	2	25409829	25410069
Gm996	ENSMUSG00000091064	2	25432493	25435417
Gm13520	ENSMUSG00000052403	2	25463412	25487281
Gm17550	ENSMUSG00000092018	2	25430951	25435619
Lcn8	ENSMUSG00000036449	2	25508640	25511737
Lcn5	ENSMUSG00000026937	2	25513472	25517497
Lcn6	ENSMUSG00000045684	2	25532306	25537128
Lcn10	ENSMUSG00000047356	2	25538246	25541601
Lcn13	ENSMUSG00000062061	2	25555563	25558846
Bmyc	ENSMUSG00000049086	2	25562399	25563237
A230005M16Rik	ENSMUSG00000087612	2	25561370	25565236
Lcn14	ENSMUSG00000079539	2	25592529	25595617
Lcn3	ENSMUSG00000026936	2	25621089	25623619
Lcn11	ENSMUSG00000069080	2	25632537	25635799
Glt6d1	ENSMUSG00000036401	2	25649379	25671368
Lcn9	ENSMUSG00000023210	2	25678673	25681057
Sohlh1	ENSMUSG00000059625	2	25698515	25702768
Kcnt1	ENSMUSG00000058740	2	25719315	25773793
Camsap1	ENSMUSG00000026933	2	25782358	25838802
Gm13538	ENSMUSG00000090073	2	25639460	25650170
Gm13539	ENSMUSG00000085484	2	25640137	25642542
Ubac1	ENSMUSG00000036352	2	25854063	25877267
Nacc2	ENSMUSG00000026932	2	25911055	25978740
Lhx3	ENSMUSG00000026934	2	26055732	26063809
Qsox2	ENSMUSG00000036327	2	26064157	26093045
C030048H21Rik	ENSMUSG00000090340	2	26101853	26102227
C030048H21Rik	ENSMUSG00000079537	2	26107277	26113074
4932418E24Rik	ENSMUSG00000048038	2	26127166	26150077
Gpsm1	ENSMUSG00000026930	2	26171035	26203757
Dnlz	ENSMUSG00000075467	2	26203641	26207630
Card9	ENSMUSG00000026928	2	26207696	26216438
Snapc4	ENSMUSG00000036281	2	26218285	26236173
Sdccag3	ENSMUSG00000026927	2	26238320	26244836
Pmpca	ENSMUSG00000026926	2	26244859	26252642
Inpp5e	ENSMUSG00000026925	2	26251769	26264723
Sec16a	ENSMUSG00000026924	2	26264951	26300736
Notch1	ENSMUSG00000026923	2	26313423	26372183
Egfl7	ENSMUSG00000026921	2	26435534	26448640
Gm20532	ENSMUSG00000092356	2	26442159	26491154
Agpat2	ENSMUSG00000026922	2	26448577	26459937
Fam69b	ENSMUSG00000036186	2	26483977	26492017
Lcn4	ENSMUSG00000026919	2	26523194	26526802
Gm13542	ENSMUSG00000082357	2	25850067	25850703
Gm13554	ENSMUSG00000087515	2	25914530	25915795
C330006A16Rik	ENSMUSG00000087679	2	25992334	25996041
1810012K08Rik	ENSMUSG00000087595	2	25994066	25995063
Gm13553	ENSMUSG00000085545	2	26042249	26047198
Gm13562	ENSMUSG00000086779	2	26208165	26227472
Gm13563	ENSMUSG00000085767	2	26237046	26244538
0610009E02Rik	ENSMUSG00000086714	2	26301216	26314910
Gm13568	ENSMUSG00000085543	2	26312664	26313836
Gm13358	ENSMUSG00000082864	2	26414145	26414713
5730588L14Rik	ENSMUSG00000086775	2	26495892	26501464
Gm13359	ENSMUSG00000082951	2	26577907	26578601
Snhg7	ENSMUSG00000091299	2	26492697	26495764
Snora43	ENSMUSG00000064858	2	26493368	26493494
Mir126	ENSMUSG00000065540	2	26446877	26446949
AL845455.1	ENSMUSG00000093104	2	25870115	25870267
Snora17	ENSMUSG00000077192	2	26494710	26494841
Abo	ENSMUSG00000015787	2	26698023	26720499
Surf6	ENSMUSG00000036160	2	26744148	26758399
Med22	ENSMUSG00000015776	2	26760782	26766197
Rpl7a	ENSMUSG00000062647	2	26766284	26768838
Surf1	ENSMUSG00000015790	2	26768903	26772050
Surf2	ENSMUSG00000014873	2	26771887	26775703
Surf4	ENSMUSG00000014867	2	26775560	26789448
Gm711	ENSMUSG00000049897	2	26789567	26809016
Rexo4	ENSMUSG00000052406	2	26809083	26819906
Adamts13	ENSMUSG00000014852	2	26828936	26865148
5930434B04Rik	ENSMUSG00000015488	2	26865446	26876609
Slc2a6	ENSMUSG00000036067	2	26876883	26883518
Tmem8c	ENSMUSG00000009214	2	26917156	26927699
Adamtsl2	ENSMUSG00000036040	2	26934899	26964501
Fam163b	ENSMUSG00000009216	2	26965900	26998011
Dbh	ENSMUSG00000000889	2	27020753	27038720
Sardh	ENSMUSG00000009614	2	27043913	27103857
Vav2	ENSMUSG00000009621	2	27117624	27282553
Brd3	ENSMUSG00000026918	2	27301099	27363182
Gm13397	ENSMUSG00000083335	2	26890200	26891077
Gm13398	ENSMUSG00000087364	2	26892805	26896373
Gm13399	ENSMUSG00000085008	2	27000418	27018223
Gm17071	ENSMUSG00000091192	2	27044902	27090230
AA645442	ENSMUSG00000086669	2	27182224	27186817
SNORD36	ENSMUSG00000064829	2	26767751	26767807
SNORD36	ENSMUSG00000065295	2	26768050	26768120
AL731552.1	ENSMUSG00000076364	2	27257372	27257471
SNORD24	ENSMUSG00000065258	2	26766781	26766854
SNORD36	ENSMUSG00000065146	2	26768368	26768435
Wdr5	ENSMUSG00000026917	2	27370677	27392055
Gm13421	ENSMUSG00000085929	2	27395946	27398882
U6atac	ENSMUSG00000080538	2	27395325	27395450
Ppp1r1c	ENSMUSG00000034683	2	79547937	79658653
Neurod1	ENSMUSG00000034701	2	79292678	79296908
Cerkl	ENSMUSG00000075256	2	79170700	79296942
Gm17325	ENSMUSG00000090313	2	79294142	79301264
Ssfa2	ENSMUSG00000027007	2	79475509	79513123
Ube2e3	ENSMUSG00000027011	2	78708281	78761450
Itga4	ENSMUSG00000027009	2	79095583	79173280
Pde1a	ENSMUSG00000059173	2	79674610	79969632
Gm14460	ENSMUSG00000082701	2	78352855	78353493
Gm14464	ENSMUSG00000082046	2	78437826	78439079
Gm14463	ENSMUSG00000084239	2	78497586	78498083
Gm14467	ENSMUSG00000082731	2	78560594	78560866
Gm17014	ENSMUSG00000084101	2	78685443	78685610
Gm14466	ENSMUSG00000083950	2	78862978	78863428
Gm14469	ENSMUSG00000080984	2	78878690	78878891
Gm14465	ENSMUSG00000083691	2	79001186	79001752
Gm13673	ENSMUSG00000081284	2	79200022	79200552
Gm13674	ENSMUSG00000083519	2	79972087	79972909
Prdx6b	ENSMUSG00000050114	2	80132629	80135513
Dnajc10	ENSMUSG00000027006	2	80155623	80194200
7SK	ENSMUSG00000089462	2	78390665	78390894
U6	ENSMUSG00000088915	2	79188522	79188624
Prokr2	ENSMUSG00000050558	2	132163469	132211183
Rassf2	ENSMUSG00000027339	2	131815151	131855994
Prnd	ENSMUSG00000027338	2	131735693	131781866
1110034G24Rik	ENSMUSG00000044991	2	132512667	132576791
Chgb	ENSMUSG00000027350	2	132607014	132620815
Adra1d	ENSMUSG00000027335	2	131371586	131388021
4930425F17Rik	ENSMUSG00000062501	2	131473561	131474330
Erv3	ENSMUSG00000037482	2	131679414	131685483
Prnp	ENSMUSG00000079037	2	131735664	131764165
5730494N06Rik	ENSMUSG00000027341	2	132065228	132073543
Gm14285	ENSMUSG00000087524	2	131387350	131388915
Gm14280	ENSMUSG00000086831	2	131478633	131547574
5330413P13Rik	ENSMUSG00000086822	2	131645742	131673396
Gm14282	ENSMUSG00000081422	2	131671092	131671331
Gm14281	ENSMUSG00000083469	2	131672131	131673424
Lamr1-ps1	ENSMUSG00000081229	2	131729822	131730695
Gm14052	ENSMUSG00000082990	2	131925605	131926635
Gm14051	ENSMUSG00000086756	2	131970269	132045986
AV099323	ENSMUSG00000087377	2	132079093	132087069
4921508D12Rik	ENSMUSG00000027345	2	132250477	132278235
Gm14095	ENSMUSG00000086250	2	132308948	132326884
1700026D11Rik	ENSMUSG00000086379	2	132316370	132349793
AU019990	ENSMUSG00000074783	2	132423931	132478804
Rpl23a-ps4	ENSMUSG00000081445	2	132487978	132488432
Gm14099	ENSMUSG00000084089	2	132499121	132499725
Gm14098	ENSMUSG00000081662	2	132504005	132504975
Gm14097	ENSMUSG00000084839	2	132520168	132524259
Gm14104	ENSMUSG00000086575	2	132671735	132672992
Gm14102	ENSMUSG00000086478	2	132784178	132785541
Gm14101	ENSMUSG00000084393	2	132805905	132806904
Gm14103	ENSMUSG00000082940	2	132872923	132873288
Gm14094	ENSMUSG00000083689	2	133025347	133025956
A430048G15Rik	ENSMUSG00000086650	2	133257831	133279098
Gpcpd1	ENSMUSG00000027346	2	132354818	132413465
Trmt6	ENSMUSG00000037376	2	132629943	132641791
Mcm8	ENSMUSG00000027353	2	132641877	132669933
Crls1	ENSMUSG00000027357	2	132672402	132692521
Lrrn4	ENSMUSG00000043110	2	132694041	132706627
Fermt1	ENSMUSG00000027356	2	132729915	132771772
Slc23a2	ENSMUSG00000027340	2	131878232	131970844
Smox	ENSMUSG00000027333	2	131317232	131351658
Pcna	ENSMUSG00000027342	2	132074898	132079050
Cds2	ENSMUSG00000058793	2	132088884	132137786
U1	ENSMUSG00000065050	2	132834223	132834390
U6	ENSMUSG00000064413	2	132542842	132542944
AL831731.1	ENSMUSG00000092654	2	131393747	131393818
Gm14100	ENSMUSG00000087585	2	133288854	133291520
Bmp2	ENSMUSG00000027358	2	133377895	133388621
Mir3090	ENSMUSG00000093338	2	133390444	133390530
U6	ENSMUSG00000064983	2	133410051	133410157
Gm12360	ENSMUSG00000087115	2	143573319	143621701
C630020P19Rik	ENSMUSG00000086171	2	143361212	143373573
Gm11644	ENSMUSG00000083787	2	143175248	143175397
Banf2	ENSMUSG00000037307	2	143858795	143899715
Snx5	ENSMUSG00000027423	2	144075859	144096642
Rpl26-ps5	ENSMUSG00000081125	2	142396244	142396702
Gm14081	ENSMUSG00000083215	2	142402664	142403593
4930511F01Rik	ENSMUSG00000086504	2	142728701	142729308
Gm14083	ENSMUSG00000082903	2	142955456	142956075
Gm14082	ENSMUSG00000083047	2	142976566	142977366
Gm11645	ENSMUSG00000080895	2	143332147	143332795
Bfsp1	ENSMUSG00000027420	2	143652264	143688909
Dstn	ENSMUSG00000015932	2	143741056	143769060
Gm11654	ENSMUSG00000082987	2	143681385	143681812
Gm11673	ENSMUSG00000081293	2	143703685	143704015
Gm11686	ENSMUSG00000080711	2	143706913	143707245
Gm12357	ENSMUSG00000086384	2	143884874	143894542
Gm11687	ENSMUSG00000082480	2	143968224	143969109
Gm5535	ENSMUSG00000074758	2	143998886	144015026
4930444E06Rik	ENSMUSG00000085127	2	144068977	144070585
Gm11688	ENSMUSG00000082436	2	144086970	144087277
Macrod2	ENSMUSG00000068205	2	140221045	142218702
Kif16b	ENSMUSG00000038844	2	142443210	142727267
Snrpb2	ENSMUSG00000008333	2	142888775	142898589
Otor	ENSMUSG00000027416	2	142904209	142907449
Pcsk2	ENSMUSG00000027419	2	143371892	143642021
Rrbp1	ENSMUSG00000027422	2	143773131	143836999
SNORA70	ENSMUSG00000065725	2	144087325	144087462
SNORA17	ENSMUSG00000088134	2	142612632	142612747
7SK	ENSMUSG00000089318	2	142207724	142208027
Polr3f	ENSMUSG00000027427	2	144353454	144367731
Rbbp9	ENSMUSG00000027428	2	144368001	144376605
Sec23b	ENSMUSG00000027429	2	144381965	144416485
Gm561	ENSMUSG00000074754	2	144419790	144421102
Dtd1	ENSMUSG00000027430	2	144425633	144594494
1700010M22Rik	ENSMUSG00000027431	2	144649402	144650151
Slc24a3	ENSMUSG00000063873	2	144993490	145467902
Rin2	ENSMUSG00000001768	2	145610470	145713352
Naa20	ENSMUSG00000002728	2	145727835	145742161
Crnkl1	ENSMUSG00000001767	2	145743215	145760750
4930529M08Rik	ENSMUSG00000037143	2	145760520	146040775
Insm1	ENSMUSG00000068154	2	146047657	146050752
Ralgapa2	ENSMUSG00000037110	2	146065615	146337762
6330439K17Rik	ENSMUSG00000037259	2	144296293	144353150
Gm11743	ENSMUSG00000084306	2	144582065	144584318
Gm11746	ENSMUSG00000082858	2	144756594	144757414
Gm14093	ENSMUSG00000087158	2	145163384	145205117
Gm11759	ENSMUSG00000084178	2	145335930	145336393
Gm14092	ENSMUSG00000074753	2	145376388	145380718
BC039771	ENSMUSG00000087594	2	145501103	145579408
Gm11763	ENSMUSG00000081722	2	145527150	145527461
Gm11764	ENSMUSG00000083014	2	145717818	145718440
A930019D19Rik	ENSMUSG00000085958	2	146085022	146092896
Gm14117	ENSMUSG00000042938	2	146131283	146132125
7SK	ENSMUSG00000088213	2	145307143	145307467
AL808119.1	ENSMUSG00000092833	2	144443879	144443969
5S_rRNA	ENSMUSG00000088711	2	145178579	145178672
AL672100.1	ENSMUSG00000092758	2	145704022	145704209
4930591A17Rik	ENSMUSG00000039138	2	179149641	179151587
Cdh4	ENSMUSG00000000305	2	179177136	179634078
Gm10711	ENSMUSG00000074518	2	179628614	179629398
Taf4a	ENSMUSG00000039117	2	179646851	179711351
Lsm14b	ENSMUSG00000039108	2	179759692	179770170
Psma7	ENSMUSG00000027566	2	179771078	179777138
Ss18l1	ENSMUSG00000039086	2	179777214	179804906
Gtpbp5	ENSMUSG00000039069	2	179805293	179820607
Hrh3	ENSMUSG00000039059	2	179834170	179839193
Osbpl2	ENSMUSG00000039050	2	179854011	179897385
Adrm1	ENSMUSG00000039041	2	179906190	179910991
Lama5	ENSMUSG00000015647	2	179911078	179960564
Rps21	ENSMUSG00000039001	2	179992082	179993150
Cables2	ENSMUSG00000038990	2	179993245	180008201
BC066135	ENSMUSG00000038980	2	180012351	180024584
Gata5	ENSMUSG00000015627	2	180059838	180069404
Gm14318	ENSMUSG00000056061	2	180067562	180075437
Slco4a1	ENSMUSG00000038963	2	180190950	180209572
Ntsr1	ENSMUSG00000027568	2	180234681	180279685
Gm14314	ENSMUSG00000082215	2	178754824	178755838
Gm14292	ENSMUSG00000061897	2	178912130	178912585
Gm14293	ENSMUSG00000081481	2	178975195	178975771
Gm14294	ENSMUSG00000081882	2	179098998	179099748
Gm14300	ENSMUSG00000083410	2	179347327	179348272
4921531C22Rik	ENSMUSG00000085704	2	179710698	179713718
Gm14299	ENSMUSG00000082850	2	179727893	179728289
Gm17180	ENSMUSG00000090589	2	179834618	179836207
B230312C02Rik	ENSMUSG00000084843	2	180105196	180120590
Mir3091	ENSMUSG00000092827	2	179992241	179992316
AL663067.1	ENSMUSG00000080507	2	179725502	179725587
Mir133a-2	ENSMUSG00000065460	2	180133084	180133187
Mir1a-1	ENSMUSG00000070144	2	180123753	180123829
1600027N09Rik	ENSMUSG00000027569	2	180316009	180321009
Ogfr	ENSMUSG00000049401	2	180323950	180330541
Col9a3	ENSMUSG00000027570	2	180332495	180356894
Tcfl5	ENSMUSG00000038932	2	180356661	180377413
Dido1	ENSMUSG00000038914	2	180392669	180444704
2310003C23Rik	ENSMUSG00000027573	2	180444822	180453438
U6	ENSMUSG00000064422	2	180432768	180432874
Slc17a9	ENSMUSG00000023393	2	180459968	180476985
Bhlhe23	ENSMUSG00000045493	2	180509086	180511605
Ythdf1	ENSMUSG00000038848	2	180639082	180655654
Birc7	ENSMUSG00000038840	2	180663728	180668715
Nkain4	ENSMUSG00000027574	2	180669477	180689404
Arfgap1	ENSMUSG00000027575	2	180701930	180717231
9230112E08Rik	ENSMUSG00000070461	2	180718937	180720296
Col20a1	ENSMUSG00000016356	2	180721240	180752245
Chrna4	ENSMUSG00000027577	2	180753085	180778251
Kcnq2	ENSMUSG00000016346	2	180810284	180869996
Eef1a2	ENSMUSG00000016349	2	180882358	180891719
Ppdpf	ENSMUSG00000016344	2	180921952	180923476
Ptk6	ENSMUSG00000038751	2	180928426	180937494
Srms	ENSMUSG00000027579	2	180940267	180947890
BC051628	ENSMUSG00000047841	2	180954718	180957559
BC006779	ENSMUSG00000027580	2	180962320	180976732
Gmeb2	ENSMUSG00000038705	2	180986154	181022740
Stmn3	ENSMUSG00000027581	2	181041164	181049205
Rtel1	ENSMUSG00000038685	2	181054444	181091321
Arfrp1	ENSMUSG00000038671	2	181092395	181100109
Zgpat	ENSMUSG00000027582	2	181099633	181118333
Lime1	ENSMUSG00000090077	2	181114783	181118333
Zbtb46	ENSMUSG00000027583	2	181122467	181194131
Abhd16b	ENSMUSG00000055882	2	181227911	181229685
Tpd52l2	ENSMUSG00000000827	2	181231847	181252671
Dnajc5	ENSMUSG00000000826	2	181255190	181289838
Uckl1	ENSMUSG00000089917	2	181303854	181319597
Znf512b	ENSMUSG00000000823	2	181316808	181327508
Prpf6	ENSMUSG00000002455	2	181326573	181390365
Samd10	ENSMUSG00000038605	2	181329923	181333917
Sox18	ENSMUSG00000046470	2	181404541	181406345
Tcea2	ENSMUSG00000059540	2	181415015	181422776
Rgs19	ENSMUSG00000002458	2	181423124	181428682
4930526D03Rik	ENSMUSG00000045794	2	181431498	181433147
Oprl1	ENSMUSG00000027584	2	181449721	181455690
Myt1	ENSMUSG00000010505	2	181498037	181562502
Pcmtd2	ENSMUSG00000027589	2	181572559	181592166
Polr3k	ENSMUSG00000038628	2	181599042	181605535
Gm14496	ENSMUSG00000053277	2	181725841	181731135
Gm14343	ENSMUSG00000087550	2	180500919	180510108
Gm14340	ENSMUSG00000074507	2	180553048	180559335
Gm14342	ENSMUSG00000086166	2	180564195	180624365
Gm14344	ENSMUSG00000085428	2	180571186	180583619
Gm14339	ENSMUSG00000085728	2	180582357	180583751
Gm14341	ENSMUSG00000087293	2	180689169	180701517
Gm14398	ENSMUSG00000083993	2	180951432	180952504
Gm14447	ENSMUSG00000084033	2	181026853	181027640
Slc2a4rg-ps	ENSMUSG00000085028	2	181118955	181122291
Gm16119	ENSMUSG00000010492	2	181313185	181319875
Gm14489	ENSMUSG00000082786	2	181458747	181459647
Gm5466	ENSMUSG00000083397	2	181631528	181633417
U1	ENSMUSG00000088378	2	181247255	181247417
U6	ENSMUSG00000089612	2	181160640	181160742
U6	ENSMUSG00000077518	2	181397011	181397117
Mir124a-3	ENSMUSG00000065454	2	180628736	180628822
HAR1F	ENSMUSG00000088334	2	180572532	180572663
U6	ENSMUSG00000084696	2	180918217	180918320
Rps24-ps2	ENSMUSG00000069125	3	3791897	3792295
Gm8775	ENSMUSG00000091223	3	4211716	4212228
Hnf4g	ENSMUSG00000017688	3	3508030	3659775
AC122735.1	ENSMUSG00000077995	3	4355004	4355096
AC167016.1	ENSMUSG00000092742	3	4305193	4305293
n-R5s194	ENSMUSG00000077912	3	4338998	4339116
SNORA38	ENSMUSG00000089287	3	4567203	4567335
AC107454.1	ENSMUSG00000077829	3	3555465	3555556
1700112D23Rik	ENSMUSG00000091329	3	28601589	28680030
Fndc3b	ENSMUSG00000039286	3	27315084	27610229
Tmem212	ENSMUSG00000043164	3	27764988	27795290
Pld1	ENSMUSG00000027695	3	27837602	28032284
Tnik	ENSMUSG00000027692	3	28162136	28574780
Slc2a2	ENSMUSG00000027690	3	28596825	28627278
Gm6505	ENSMUSG00000070522	3	28662453	28664314
Eif5a2	ENSMUSG00000050192	3	28680233	28697768
Gm17485	ENSMUSG00000090783	3	28694778	28701145
Rpl22l1	ENSMUSG00000039221	3	28704358	28706274
Gm1527	ENSMUSG00000074655	3	28791539	28825646
Egfem1	ENSMUSG00000063600	3	28980945	29590126
Mir551b	ENSMUSG00000076120	3	29315745	29315842
AC122490.1	ENSMUSG00000080638	3	28644523	28644604
SNORA81	ENSMUSG00000088772	3	27767035	27767195
Mir446q	ENSMUSG00000092990	3	28318865	28318940
Gm16722	ENSMUSG00000085702	3	29911301	29952107
Mecom	ENSMUSG00000027684	3	29850221	30446930
Gm10258	ENSMUSG00000069074	3	30166747	30168869
Gm15462	ENSMUSG00000086189	3	30585007	30591288
Gm15496	ENSMUSG00000085953	3	31184509	31215813
Phc3	ENSMUSG00000037652	3	30798217	30868337
Prkci	ENSMUSG00000037643	3	30894669	30951663
Skil	ENSMUSG00000027660	3	30993980	31021499
Cldn11	ENSMUSG00000037625	3	31048868	31063246
Slc7a14	ENSMUSG00000069072	3	31101832	31209300
Arpm1	ENSMUSG00000037737	3	30495995	30498861
Mynn	ENSMUSG00000037730	3	30501009	30517414
Lrrc34	ENSMUSG00000027702	3	30523189	30546791
Lrriq4	ENSMUSG00000027703	3	30543429	30571353
Lrrc31	ENSMUSG00000074653	3	30577980	30598765
Samd7	ENSMUSG00000051860	3	30645215	30666096
Sec62	ENSMUSG00000027706	3	30691798	30720185
Gpr160	ENSMUSG00000037661	3	30754872	30796114
Telomerase-vert	ENSMUSG00000065361	3	30494268	30494679
Gm15574	ENSMUSG00000081883	3	32778933	32779530
4930419G24Rik	ENSMUSG00000087625	3	32923699	32987529
Kcnmb3	ENSMUSG00000091091	3	32371243	32390891
Kcnmb2	ENSMUSG00000037610	3	31801429	32099102
Zmat3	ENSMUSG00000027663	3	32233718	32264600
4930429B21Rik	ENSMUSG00000049507	3	32264697	32266358
Pik3ca	ENSMUSG00000027665	3	32296593	32367408
Ndufb5	ENSMUSG00000027673	3	32635912	32650488
Usp13	ENSMUSG00000056900	3	32716468	32836993
Pex5l	ENSMUSG00000027674	3	32848553	33042169
Zfp639	ENSMUSG00000027667	3	32414217	32419607
Mfn1	ENSMUSG00000027668	3	32428387	32478161
Gnb4	ENSMUSG00000027669	3	32479254	32515507
Actl6a	ENSMUSG00000027671	3	32607468	32625890
Mrpl47	ENSMUSG00000037531	3	32624319	32636069
Ttc14	ENSMUSG00000027677	3	33698877	33713782
Ccdc39	ENSMUSG00000027676	3	33711284	33743232
U4	ENSMUSG00000084665	3	32910880	32911036
SNORA48	ENSMUSG00000088260	3	33291979	33292121
SNORA17	ENSMUSG00000077559	3	33857991	33858122
Gm9791	ENSMUSG00000044434	3	33903939	33904385
Sox2ot	ENSMUSG00000090828	3	34003360	34581541
Gm5708	ENSMUSG00000092249	3	34082229	34083114
Gm20446	ENSMUSG00000092196	3	34197440	34221211
Fxr1	ENSMUSG00000027680	3	33919001	33968264
Dnajc19	ENSMUSG00000027679	3	33954942	33980243
Gm20514	ENSMUSG00000092355	3	34223741	34250637
Gm20515	ENSMUSG00000092242	3	34326295	34334019
Sox2	ENSMUSG00000074637	3	34548927	34551383
Mir1897	ENSMUSG00000084530	3	34537386	34537464
AC158547.1	ENSMUSG00000093499	3	35224536	35224627
AC137708.1	ENSMUSG00000093307	3	34489443	34489530
Vmn2r7	ENSMUSG00000062200	3	64494582	64648687
Kcnab1	ENSMUSG00000027827	3	64913306	65182145
Ssr3	ENSMUSG00000027828	3	65183577	65196545
4931440P22Rik	ENSMUSG00000074580	3	65311179	65333301
Tiparp	ENSMUSG00000034640	3	65332332	65359067
Lekr1	ENSMUSG00000074579	3	65470150	65635084
Ccnl1	ENSMUSG00000027829	3	65750073	65762171
Veph1	ENSMUSG00000027831	3	65857483	66100759
Ptx3	ENSMUSG00000027832	3	66023809	66029728
RP23-445D13.4	ENSMUSG00000093484	3	64400835	64409695
Vmn2r-ps10	ENSMUSG00000093646	3	64425616	64427917
Vmn2r-ps10	ENSMUSG00000090261	3	64427143	64427917
Vmn2r-ps11	ENSMUSG00000093434	3	64436496	64648665
AC110575.2	ENSMUSG00000093524	3	64436785	64648665
Vmn2r-ps12	ENSMUSG00000093474	3	64548671	64549567
Vmn2r-ps12	ENSMUSG00000090010	3	64548671	64549539
RP24-549B23.7	ENSMUSG00000093414	3	64574208	64574440
Vmn2r-ps13	ENSMUSG00000093767	3	64703079	64703684
A730090N16Rik	ENSMUSG00000090120	3	65128698	65153351
Gm5540	ENSMUSG00000048916	3	65197259	65199106
U6	ENSMUSG00000065330	3	65575433	65575539
U1	ENSMUSG00000064522	3	65892031	65892183
U6	ENSMUSG00000087825	3	65329623	65329715
SNORA17	ENSMUSG00000088824	3	64698393	64698518
Zbbx	ENSMUSG00000034151	3	74841829	74968956
Serpini2	ENSMUSG00000034139	3	75046292	75074000
Pdcd10	ENSMUSG00000027835	3	75320412	75360778
Serpini1	ENSMUSG00000027834	3	75361469	75447417
Golim4	ENSMUSG00000034109	3	75680105	75760871
Fstl5	ENSMUSG00000034098	3	75878192	76513941
SNORA17	ENSMUSG00000088638	3	75518712	75518846
SNORA17	ENSMUSG00000088481	3	76909131	76909207
Magi3	ENSMUSG00000052539	3	103817182	104024297
Gm5546	ENSMUSG00000022187	3	104154558	104170536
Lrig2	ENSMUSG00000032913	3	104257907	104315840
Slc16a1	ENSMUSG00000032902	3	104442591	104462385
Fam19a3	ENSMUSG00000055865	3	104570324	104584758
Ppm1j	ENSMUSG00000002228	3	104583974	104588936
Rhoc	ENSMUSG00000002233	3	104591929	104597377
Mov10	ENSMUSG00000002227	3	104597754	104621481
Capza1	ENSMUSG00000070372	3	104625697	104667423
St7l	ENSMUSG00000045576	3	104667421	104730812
Wnt2b	ENSMUSG00000027840	3	104747723	104764627
Cttnbp2nl	ENSMUSG00000062127	3	104804833	104856064
4930564D02Rik	ENSMUSG00000051788	3	104869762	104881724
Kcnd3	ENSMUSG00000040896	3	105255248	105476920
Ddx20	ENSMUSG00000027905	3	105481178	105490492
6530418L21Rik	ENSMUSG00000048458	3	105507517	105523760
Rap1a	ENSMUSG00000068798	3	105530185	105604248
Adora3	ENSMUSG00000000562	3	105673776	105711846
Adora3	ENSMUSG00000074344	3	105673825	105726954
I830077J02Rik	ENSMUSG00000074342	3	105728809	105735582
Atp5f1	ENSMUSG00000000563	3	105745616	105763017
Wdr77	ENSMUSG00000000561	3	105762287	105787518
Ovgp1	ENSMUSG00000074340	3	105776629	105790341
1700027A23Rik	ENSMUSG00000010136	3	105799875	105817523
Chi3l7	ENSMUSG00000043873	3	105819837	105835813
Gm4540	ENSMUSG00000092072	3	105837628	105837921
Gm6485	ENSMUSG00000089999	3	104555645	104556083
1700095B22Rik	ENSMUSG00000074346	3	105244513	105255873
U6	ENSMUSG00000084653	3	104405081	104405162
U6	ENSMUSG00000088016	3	103896304	103896405
U6	ENSMUSG00000089452	3	104504793	104504882
SNORA17	ENSMUSG00000088479	3	104005033	104005148
Chia	ENSMUSG00000062778	3	105916147	105935038
Chi3l3	ENSMUSG00000040809	3	105950472	106022425
Chi3l4	ENSMUSG00000063779	3	106004408	106022425
BC051070	ENSMUSG00000027902	3	106190306	106209100
2010016I18Rik	ENSMUSG00000091575	3	106284931	106286355
Dennd2d	ENSMUSG00000027901	3	106285323	106305948
Cept1	ENSMUSG00000040774	3	106305178	106350720
Dram2	ENSMUSG00000027900	3	106350611	106377763
4933421E11Rik	ENSMUSG00000056260	3	106487905	106539495
Cd53	ENSMUSG00000040747	3	106561779	106593067
Olfr266	ENSMUSG00000043529	3	106624474	106625500
Kcna3	ENSMUSG00000047959	3	106839080	106841047
AI504432	ENSMUSG00000056145	3	106842422	106854070
A930002I21Rik	ENSMUSG00000050179	3	106893880	106901319
Kcna2	ENSMUSG00000040724	3	106904485	106909797
Kcna10	ENSMUSG00000042861	3	106985974	106998639
Cym	ENSMUSG00000046213	3	107014211	107024650
Prok1	ENSMUSG00000070368	3	107038449	107042625
Hbxip	ENSMUSG00000087260	3	107081776	107086997
Slc16a4	ENSMUSG00000027896	3	107094148	107115033
Rbm15	ENSMUSG00000048109	3	107128863	107136591
Kcnc4	ENSMUSG00000027895	3	107241221	107261816
Slc6a17	ENSMUSG00000027894	3	107270461	107320936
Ubl4b	ENSMUSG00000055891	3	107356616	107357991
Alx3	ENSMUSG00000092379	3	107397949	107408792
Alx3	ENSMUSG00000014603	3	107397949	107408687
Fam40a	ENSMUSG00000014601	3	107415450	107434628
Gm10961	ENSMUSG00000078604	3	107434240	107436008
Ahcyl1	ENSMUSG00000027893	3	107466036	107499478
Csf1	ENSMUSG00000014599	3	107543966	107563387
Eps8l3	ENSMUSG00000040600	3	107680148	107695817
Gstm5	ENSMUSG00000004032	3	107698739	107701604
4933431E20Rik	ENSMUSG00000086968	3	107691768	107699131
7SK	ENSMUSG00000084640	3	107218781	107219113
Gstm7	ENSMUSG00000004035	3	107729252	107734735
Gstm6	ENSMUSG00000068762	3	107741765	107746667
Gm12489	ENSMUSG00000082720	3	107722580	107722727
Gstm3	ENSMUSG00000004038	3	107745251	107772201
Gm12494	ENSMUSG00000089664	3	107746163	107756354
Gm12497	ENSMUSG00000049231	3	107782550	107782786
Gstm2	ENSMUSG00000040562	3	107784620	107789371
Syde2	ENSMUSG00000036863	3	145650834	145684684
Wdr63	ENSMUSG00000043020	3	145703490	145771094
Mcoln3	ENSMUSG00000036853	3	145780423	145804770
Mcoln2	ENSMUSG00000011008	3	145812797	145858477
Lpar3	ENSMUSG00000036832	3	145883925	145949178
Ssx2ip	ENSMUSG00000036825	3	146067606	146103103
Dnase2b	ENSMUSG00000028185	3	146067777	146259576
Ctbs	ENSMUSG00000028189	3	146113434	146128813
Spata1	ENSMUSG00000028188	3	146120167	146162717
Gng5	ENSMUSG00000068523	3	146162798	146168536
Rpf1	ENSMUSG00000028187	3	146169312	146184387
Uox	ENSMUSG00000028186	3	146260041	146295269
4930503B20Rik	ENSMUSG00000090202	3	146308157	146314281
Samd13	ENSMUSG00000048652	3	146308159	146348556
Prkacb	ENSMUSG00000005034	3	146392543	146475924
Gm10288	ENSMUSG00000070343	3	146501775	146502311
Ttll7	ENSMUSG00000036745	3	146515331	146646973
Gm16325	ENSMUSG00000085810	3	146304896	146314679
U1	ENSMUSG00000065937	3	145779066	145779218
U6	ENSMUSG00000088218	3	146050706	146050808
AC124987.1	ENSMUSG00000077892	3	146062098	146062181
9530002B09Rik	ENSMUSG00000023263	4	122366518	122382372
Ppt1	ENSMUSG00000028657	4	122513485	122536418
Cap1	ENSMUSG00000028656	4	122536290	122563299
Mfsd2a	ENSMUSG00000028655	4	122624093	122638431
Mycl1	ENSMUSG00000028654	4	122672895	122679728
Trit1	ENSMUSG00000028653	4	122693840	122732192
Bmp8b	ENSMUSG00000002384	4	122782408	122809342
Gm17244	ENSMUSG00000091865	4	122792642	122793929
Oxct2b	ENSMUSG00000076438	4	122793507	122795192
Ppie	ENSMUSG00000028651	4	122804358	122817194
Hpcal4	ENSMUSG00000046093	4	122860470	122871944
Nt5c1a	ENSMUSG00000054958	4	122878747	122893518
Heyl	ENSMUSG00000032744	4	122910799	122927118
Pabpc4	ENSMUSG00000011257	4	122939594	122976168
Bmp8a	ENSMUSG00000032726	4	122989888	123020495
Oxct2a	ENSMUSG00000076436	4	122999118	123000877
Macf1	ENSMUSG00000028649	4	123026876	123361603
Ndufs5	ENSMUSG00000028648	4	123389953	123395445
Akirin1	ENSMUSG00000023075	4	123411802	123427588
Rhbdl2	ENSMUSG00000043333	4	123465117	123507147
4933427I04Rik	ENSMUSG00000073761	4	123536922	123540408
Mycbp	ENSMUSG00000028647	4	123582075	123589512
Rragc	ENSMUSG00000028646	4	123594689	123614240
Gm12895	ENSMUSG00000083365	4	122132453	122132678
Gm12877	ENSMUSG00000081377	4	122259943	122282137
Gm12874	ENSMUSG00000084196	4	122270227	122271311
Gm12875	ENSMUSG00000080871	4	122317589	122325569
Gm12876	ENSMUSG00000083109	4	122338166	122354521
Gm12872	ENSMUSG00000084082	4	122407527	122411976
Gm12873	ENSMUSG00000083494	4	122455397	122470992
Gm12891	ENSMUSG00000080929	4	122603076	122603315
4933421A08Rik	ENSMUSG00000086443	4	122638552	122640718
Gm12923	ENSMUSG00000086153	4	122770008	122771271
Gm12901	ENSMUSG00000083720	4	122935289	122936147
Gm12900	ENSMUSG00000082634	4	122952143	122952715
Gm12924	ENSMUSG00000081528	4	123112860	123113177
Gm12926	ENSMUSG00000081585	4	123307538	123307946
Gm12925	ENSMUSG00000087307	4	123343124	123348460
Gm12922	ENSMUSG00000081170	4	123386462	123387270
1700121C08Rik	ENSMUSG00000086275	4	123510865	123536756
Gm12904	ENSMUSG00000082310	4	123515347	123516745
D130007C19Rik	ENSMUSG00000054304	4	123579372	123580877
Gm12903	ENSMUSG00000080993	4	123579665	123580208
Gm12905	ENSMUSG00000085875	4	123582305	123594512
Gm12902	ENSMUSG00000082515	4	123603477	123603798
Gm12916	ENSMUSG00000086087	4	123970936	123977091
1700021L23Rik	ENSMUSG00000086955	4	123980080	123988704
4933435F18Rik	ENSMUSG00000086978	4	124003551	124009751
Gm17408	ENSMUSG00000091927	4	123575876	123582085
SNORA55	ENSMUSG00000065778	4	122970395	122970525
SNORA55	ENSMUSG00000064655	4	122968587	122968717
7SK	ENSMUSG00000089588	4	123167474	123167579
AL713967.1	ENSMUSG00000078065	4	122330722	122330811
U6	ENSMUSG00000088933	4	124012821	124012924
3100002H09Rik	ENSMUSG00000051219	4	124287174	124288046
Pou3f1	ENSMUSG00000078236	4	124334050	124337899
Utp11l	ENSMUSG00000028907	4	124355404	124370844
Fhl3	ENSMUSG00000032643	4	124377945	124385855
Sf3a3	ENSMUSG00000028902	4	124392020	124409704
Inpp5b	ENSMUSG00000028894	4	124419094	124478755
1700057H15Rik	ENSMUSG00000084757	4	124091659	124163202
4933407E24Rik	ENSMUSG00000073759	4	124246433	124251888
Pou3f1	ENSMUSG00000090125	4	124334889	124337899
Gm12917	ENSMUSG00000083104	4	124396243	124396881
Gm12915	ENSMUSG00000086589	4	124412974	124428598
AL606907.1	ENSMUSG00000077026	4	124413083	124413192
Mir697	ENSMUSG00000076271	4	124408938	124409046
Mir698	ENSMUSG00000076119	4	124421025	124421133
U6	ENSMUSG00000088067	4	124374749	124374851
Zmym6	ENSMUSG00000042408	4	126754627	126801616
Gm12942	ENSMUSG00000070737	4	126800935	126806888
Dlgap3	ENSMUSG00000042388	4	126846448	126914266
BC003266	ENSMUSG00000042380	4	126921028	126925053
Gja4	ENSMUSG00000050234	4	126988665	126991283
Gjb3	ENSMUSG00000042367	4	127002479	127008088
Gjb4	ENSMUSG00000046623	4	127028330	127031325
Gjb5	ENSMUSG00000042357	4	127032053	127035425
CK137956	ENSMUSG00000028813	4	127604836	127648195
Csmd2	ENSMUSG00000028804	4	127665101	128244903
Hmgb4	ENSMUSG00000048686	4	127937457	127938139
Zscan20	ENSMUSG00000061894	4	128260783	128287342
Tlr12	ENSMUSG00000062545	4	128292690	128295863
Phc2	ENSMUSG00000028796	4	128331982	128430125
A3galt2	ENSMUSG00000028794	4	128432608	128446542
Zfp362	ENSMUSG00000028799	4	128450332	128483289
Trim62	ENSMUSG00000041000	4	128560824	128588572
Adc	ENSMUSG00000028789	4	128607477	128639686
Ak2	ENSMUSG00000028792	4	128669202	128688773
Rnf19b	ENSMUSG00000028793	4	128735515	128763130
Gm12943	ENSMUSG00000082220	4	126818523	126818732
Gm12948	ENSMUSG00000082047	4	126974028	126974709
Gm12947	ENSMUSG00000079998	4	127085623	127086042
4930471C06Rik	ENSMUSG00000086138	4	127152092	127154084
1700080G11Rik	ENSMUSG00000086771	4	127208866	127210129
A630031M04Rik	ENSMUSG00000087470	4	127222345	127247746
1700112K13Rik	ENSMUSG00000087510	4	127487882	127489417
4930465A12Rik	ENSMUSG00000087459	4	127810767	127841503
4930546G22Rik	ENSMUSG00000085717	4	127938288	127940234
Gm12958	ENSMUSG00000084891	4	128314715	128315691
Gm12968	ENSMUSG00000085701	4	128523441	128550942
Gm12969	ENSMUSG00000084011	4	128545637	128546640
Gm15904	ENSMUSG00000085961	4	128613249	128617439
1700086P04Rik	ENSMUSG00000085085	4	128727341	128735227
U6	ENSMUSG00000088982	4	126785710	126785815
U6	ENSMUSG00000087987	4	126961975	126962077
Tmem54	ENSMUSG00000028786	4	128782792	128788870
Hpca	ENSMUSG00000028785	4	128788814	128799280
Fndc5	ENSMUSG00000001334	4	128814243	128821837
S100pbp	ENSMUSG00000040928	4	128825249	128866971
Yars	ENSMUSG00000028811	4	128867004	128896851
C77080	ENSMUSG00000050390	4	128896822	128938648
Gm15906	ENSMUSG00000087416	4	128812335	128814154
snoU13	ENSMUSG00000088921	4	128896701	128896788
Gm12976	ENSMUSG00000087575	4	128939209	128942254
Sync	ENSMUSG00000001333	4	128964861	128985803
Rbbp4	ENSMUSG00000057236	4	128984344	129012614
Zbtb8os	ENSMUSG00000057572	4	129012939	129031791
Zbtb8a	ENSMUSG00000028807	4	129030872	129055360
Zbtb8b	ENSMUSG00000048485	4	129103009	129118097
Bsdc1	ENSMUSG00000040859	4	129138825	129165742
Tssk3	ENSMUSG00000000411	4	129166258	129168266
1700125D06Rik	ENSMUSG00000078554	4	129168434	129169200
Marcksl1	ENSMUSG00000047945	4	129190825	129193229
Hdac1	ENSMUSG00000028800	4	129193348	129219957
Gm12980	ENSMUSG00000082468	4	129057088	129057423
Gm12979	ENSMUSG00000086336	4	129169213	129186990
Gm17525	ENSMUSG00000091673	4	128986325	128995687
U1	ENSMUSG00000064613	4	129135595	129135734
AL607123.1	ENSMUSG00000093163	4	128960109	128960190
Lck	ENSMUSG00000000409	4	129225588	129250885
Fam167b	ENSMUSG00000050493	4	129254059	129255793
Eif3i	ENSMUSG00000028798	4	129269204	129277892
2510006D16Rik	ENSMUSG00000028797	4	129277912	129301303
Dcdc2b	ENSMUSG00000078552	4	129285773	129291498
Iqcc	ENSMUSG00000040795	4	129292370	129296343
Ccdc28b	ENSMUSG00000028795	4	129296518	129301191
Txlna	ENSMUSG00000053841	4	129303327	129318309
Kpna6	ENSMUSG00000003731	4	129321224	129350011
Tmem39b	ENSMUSG00000053730	4	129353599	129374082
Khdrbs1	ENSMUSG00000028790	4	129380408	129419547
Gm12965	ENSMUSG00000086797	4	129300855	129301336
Gm12967	ENSMUSG00000080944	4	129438872	129439160
Ptp4a2	ENSMUSG00000028788	4	129488463	129527247
Gm10571	ENSMUSG00000073753	4	129532315	129533954
Gm12966	ENSMUSG00000070729	4	129576337	129577146
E330017L17Rik	ENSMUSG00000086369	4	129583460	129597031
U1	ENSMUSG00000065768	4	129572817	129572968
Spocd1	ENSMUSG00000028784	4	129624791	129634359
Bai2	ENSMUSG00000028782	4	129662114	129699877
1700003M07Rik	ENSMUSG00000085389	4	129637618	129640901
Gm12963	ENSMUSG00000085517	4	129701500	129725018
Col16a1	ENSMUSG00000040690	4	129725084	129776527
Pef1	ENSMUSG00000028779	4	129779802	129805379
Hcrtr1	ENSMUSG00000028778	4	129807461	129816603
Tinagl1	ENSMUSG00000028776	4	129841698	129852366
Gm853	ENSMUSG00000023120	4	129886353	129899645
Serinc2	ENSMUSG00000023232	4	129930739	129956449
Gm10570	ENSMUSG00000073752	4	129985406	129985918
Fabp3	ENSMUSG00000028773	4	129985839	129992707
Zcchc17	ENSMUSG00000028772	4	129992627	130037190
Snrnp40	ENSMUSG00000074088	4	130037379	130067274
Nkain1	ENSMUSG00000078532	4	130125705	130169623
Pum1	ENSMUSG00000028580	4	130219236	130337479
Gm12971	ENSMUSG00000087449	4	130314478	130318294
Snord85	ENSMUSG00000065196	4	130305549	130305621
Sdc3	ENSMUSG00000025743	4	130348452	130382234
Gm12972	ENSMUSG00000086548	4	130341984	130343770
Gm17328	ENSMUSG00000091343	4	130330732	130335161
SNORD103	ENSMUSG00000065790	4	130331656	130331738
SNORD103	ENSMUSG00000064484	4	130322246	130322328
Gm12970	ENSMUSG00000087451	4	130367532	130368241
SNORA17	ENSMUSG00000077381	4	130413666	130413795
Laptm5	ENSMUSG00000028581	4	130469040	130492056
Matn1	ENSMUSG00000040533	4	130500300	130511390
Gm12973	ENSMUSG00000085804	4	130530705	130557254
A930031H19Rik	ENSMUSG00000086262	4	130556747	130566389
Ptpru	ENSMUSG00000028909	4	131324372	131394203
Mecr	ENSMUSG00000028910	4	131399385	131423701
Srsf4	ENSMUSG00000028911	4	131429532	131457640
Gm831	ENSMUSG00000078531	4	131043112	131061442
Gm12962	ENSMUSG00000087171	4	131202963	131233760
Gm16080	ENSMUSG00000086856	4	131250522	131266423
Gm12992	ENSMUSG00000085667	4	131455393	131475944
Gm12978	ENSMUSG00000083013	4	131458705	131459226
SNORA17	ENSMUSG00000088041	4	130795192	130795325
Tmem200b	ENSMUSG00000070720	4	131477686	131478540
Epb4.1	ENSMUSG00000028906	4	131479328	131631236
Gm10300	ENSMUSG00000070717	4	131630612	131632907
Oprd1	ENSMUSG00000050511	4	131666641	131700401
Ythdf2	ENSMUSG00000040025	4	131740827	131768218
Gm13063	ENSMUSG00000084869	4	131604093	131604876
Gm13214	ENSMUSG00000083368	4	131649806	131650213
Gm13215	ENSMUSG00000081394	4	131704328	131704799
Gmeb1	ENSMUSG00000028901	4	131776940	131817517
Taf12	ENSMUSG00000028899	4	131830290	131851681
Rab42-ps	ENSMUSG00000089687	4	131858112	131859300
Trnau1ap	ENSMUSG00000028898	4	131867678	131885453
Rcc1	ENSMUSG00000028896	4	131887834	131909520
Phactr4	ENSMUSG00000066043	4	131911838	131978404
Med18	ENSMUSG00000066042	4	132014646	132019836
Sesn2	ENSMUSG00000028893	4	132047947	132066416
Atpif1	ENSMUSG00000054428	4	132086470	132089574
Dnajc8	ENSMUSG00000054405	4	132091465	132109657
Ptafr	ENSMUSG00000056529	4	132119982	132138598
Eya3	ENSMUSG00000028886	4	132194902	132280680
Xkr8	ENSMUSG00000037752	4	132280812	132288461
Smpdl3b	ENSMUSG00000028885	4	132288881	132313167
Rpa2	ENSMUSG00000028884	4	132324247	132334667
BC013712	ENSMUSG00000037731	4	132337758	132352302
Ppp1r8	ENSMUSG00000028882	4	132382844	132399084
Stx12	ENSMUSG00000028879	4	132409416	132440424
Fam76a	ENSMUSG00000028878	4	132455128	132478473
Fgr	ENSMUSG00000028874	4	132530010	132557825
Ahdc1	ENSMUSG00000037692	4	132567175	132634025
Wasf2	ENSMUSG00000028868	4	132686420	132755671
Gpr3	ENSMUSG00000049649	4	132765255	132768451
Cd164l2	ENSMUSG00000028865	4	132768046	132780470
Map3k6	ENSMUSG00000028862	4	132796733	132808844
Sytl1	ENSMUSG00000028860	4	132809005	132819028
Tmem222	ENSMUSG00000028857	4	132821960	132833707
Wdtc1	ENSMUSG00000037622	4	132848374	132909396
Slc9a1	ENSMUSG00000028854	4	132925621	132979617
Fam46b	ENSMUSG00000046694	4	133036047	133043853
Trnp1	ENSMUSG00000056596	4	133047015	133054465
1810019J16Rik	ENSMUSG00000037600	4	133074878	133086705
Gm17688	ENSMUSG00000090282	4	133083646	133085241
Nudc	ENSMUSG00000028851	4	133088457	133101911
Nr0b2	ENSMUSG00000037583	4	133109291	133112451
Gpatch3	ENSMUSG00000028850	4	133130660	133140158
Gm10151	ENSMUSG00000066041	4	132641389	132645061
Gm17300	ENSMUSG00000091021	4	131907687	131909297
Rps15a-ps4	ENSMUSG00000083757	4	131775961	131776352
Gm13252	ENSMUSG00000084105	4	131800861	131801181
Snhg12	ENSMUSG00000086290	4	131864593	131866939
Snhg3	ENSMUSG00000085241	4	131903929	131909601
Gm12981	ENSMUSG00000086997	4	132059476	132065564
Gm12999	ENSMUSG00000087352	4	132088602	132089516
Gm13022	ENSMUSG00000081647	4	132357885	132358169
Gm13033	ENSMUSG00000083816	4	132440678	132442541
Gm13259	ENSMUSG00000083241	4	132836772	132837227
Gm13257	ENSMUSG00000086850	4	133035271	133038441
Gm13258	ENSMUSG00000082668	4	133128778	133129067
Mir5122	ENSMUSG00000092745	4	132925691	132925779
Snora16a	ENSMUSG00000065097	4	131865380	131865515
Snora44	ENSMUSG00000064604	4	131865856	131865984
AL805897.1	ENSMUSG00000093670	4	131964224	131964319
Snord99	ENSMUSG00000080615	4	131866606	131866679
U6	ENSMUSG00000065623	4	132103019	132103122
U6	ENSMUSG00000064739	4	131997949	131998042
SCARNA1	ENSMUSG00000088990	4	132394298	132394462
Snora61	ENSMUSG00000064949	4	131866155	131866284
snoU13	ENSMUSG00000089466	4	132041800	132041909
Snora73b	ENSMUSG00000065353	4	131908237	131908441
U6	ENSMUSG00000087911	4	132487126	132487232
7SK	ENSMUSG00000089298	4	132727342	132727629
U11	ENSMUSG00000077323	4	131825995	131826128
Snora73a	ENSMUSG00000064387	4	131908690	131908894
Gpn2	ENSMUSG00000028848	4	133140277	133147650
Sfn	ENSMUSG00000047281	4	133156471	133158083
Zdhhc18	ENSMUSG00000037553	4	133161214	133206069
Gm13213	ENSMUSG00000083885	4	133194125	133194598
BX537327.1	ENSMUSG00000093031	4	133209917	133210170
Pigv	ENSMUSG00000043257	4	133216302	133228562
Arid1a	ENSMUSG00000007880	4	133234923	133312684
Akap9	ENSMUSG00000040407	5	3928054	4080209
Cyp51	ENSMUSG00000001467	5	4081145	4104746
Gm9897	ENSMUSG00000053178	5	4192360	4197652
Fzd1	ENSMUSG00000044674	5	4753842	4758216
Cdk14	ENSMUSG00000028926	5	4803391	5420312
1700015F17Rik	ENSMUSG00000079666	5	5437827	5479143
Cldn12	ENSMUSG00000046798	5	5505109	5514958
Gtpbp10	ENSMUSG00000040464	5	5537454	5559538
Gm8773	ENSMUSG00000073234	5	5573952	5576203
A330021E22Rik	ENSMUSG00000040473	5	5579278	5664239
Steap2	ENSMUSG00000015653	5	5664831	5694578
Steap1	ENSMUSG00000015652	5	5736317	5749326
Gm17431	ENSMUSG00000091282	5	5781530	5783636
Gm15750	ENSMUSG00000083921	5	4764834	4765647
Gm15459	ENSMUSG00000083840	5	5781530	5783607
SCARNA15	ENSMUSG00000088131	5	4985111	4985238
U1	ENSMUSG00000088692	5	6014863	6015024
AC026231.1	ENSMUSG00000093159	5	4854314	4854423
U6	ENSMUSG00000088380	5	6410438	6410530
AC132270.1	ENSMUSG00000080484	5	6370870	6370960
Zfp804b	ENSMUSG00000092094	5	6769030	6876523
U7	ENSMUSG00000088173	5	6649231	6649287
U12	ENSMUSG00000064851	5	7177706	7177856
4921511H03Rik	ENSMUSG00000040514	5	7304125	7311491
Magi2	ENSMUSG00000040003	5	18732864	20210616
Magi2	ENSMUSG00000067798	5	20045708	20046222
Magi2	ENSMUSG00000073174	5	20208095	20211867
Phtf2	ENSMUSG00000039987	5	20264481	20387942
Tmem60	ENSMUSG00000045435	5	20388009	20392688
Rsbn1l	ENSMUSG00000039968	5	20398846	20457640
Ptpn12	ENSMUSG00000028771	5	20492463	20561729
Pion	ENSMUSG00000039934	5	20692085	20797519
Ccdc146	ENSMUSG00000064280	5	20798779	20930495
Fgl2	ENSMUSG00000039899	5	20878460	20884192
Fam185a	ENSMUSG00000047221	5	20930776	20987942
Fbxl13	ENSMUSG00000048520	5	20989665	21151423
Lrrc17	ENSMUSG00000039883	5	21049345	21081718
Gm6543	ENSMUSG00000054284	5	21104697	21105368
Armc10	ENSMUSG00000038525	5	21151631	21168512
Napepld	ENSMUSG00000044968	5	21168719	21207214
Pmpcb	ENSMUSG00000029017	5	21242959	21262970
Dnajc2	ENSMUSG00000029014	5	21263085	21291069
Psmc2	ENSMUSG00000028932	5	21291101	21309605
Slc26a5	ENSMUSG00000029015	5	21316473	21371422
Reln	ENSMUSG00000042453	5	21390272	21850523
Rpl31-ps5	ENSMUSG00000082716	5	20311908	20312282
Gm15719	ENSMUSG00000081242	5	21195359	21195993
Gm15715	ENSMUSG00000083006	5	21254049	21254331
Gm16111	ENSMUSG00000090008	5	21395598	21395882
Gm10475	ENSMUSG00000073152	5	21416749	21459832
Dnaja1-ps	ENSMUSG00000090197	5	21457676	21458317
U6	ENSMUSG00000087768	5	19770159	19770258
SNORA40	ENSMUSG00000087813	5	20622901	20623019
U6	ENSMUSG00000064504	5	19598433	19598536
SNORA17	ENSMUSG00000077171	5	19620138	19620265
Srpk2	ENSMUSG00000062604	5	23009174	23182266
Pus7	ENSMUSG00000057541	5	23246466	23289529
Rint1	ENSMUSG00000028999	5	23293529	23326187
Tomm7	ENSMUSG00000028998	5	23344762	23349979
Fam126a	ENSMUSG00000028995	5	23421094	23536508
Klhl7	ENSMUSG00000028986	5	23606408	23667041
Nupl2	ENSMUSG00000048439	5	23670781	23689831
Kcnh2	ENSMUSG00000038319	5	23825407	23857422
Nos3	ENSMUSG00000028978	5	23870628	23890292
Atg9b	ENSMUSG00000038295	5	23889999	23897961
Abcb8	ENSMUSG00000028973	5	23899481	23915872
Accn3	ENSMUSG00000038276	5	23919269	23923652
Cdk5	ENSMUSG00000028969	5	23924068	23929348
Slc4a2	ENSMUSG00000028962	5	23929655	23946768
Fastk	ENSMUSG00000028959	5	23944258	23951105
Tmub1	ENSMUSG00000028958	5	23951276	23953672
Gm10472	ENSMUSG00000073129	5	23956992	23957525
Agap3	ENSMUSG00000023353	5	23957995	24007865
Gbx1	ENSMUSG00000067724	5	24008575	24033094
Asb10	ENSMUSG00000038204	5	24038515	24046796
4931409K22Rik	ENSMUSG00000038199	5	24049252	24061287
Abcf2	ENSMUSG00000028953	5	24071161	24083217
Chpf2	ENSMUSG00000038181	5	24092559	24100213
Smarcd3	ENSMUSG00000028949	5	24096636	24107830
Nub1	ENSMUSG00000028954	5	24191633	24216373
Wdr86	ENSMUSG00000055235	5	24217556	24236545
Crygn	ENSMUSG00000038135	5	24256821	24263826
Rheb	ENSMUSG00000028945	5	24308641	24348442
Prkag2	ENSMUSG00000028944	5	24368562	24606460
1500035N22Rik	ENSMUSG00000059631	5	24491660	24503986
Galntl5	ENSMUSG00000028938	5	24687278	24726115
E130116L18Rik	ENSMUSG00000054116	5	24728666	24728971
Galnt11	ENSMUSG00000038072	5	24728700	24771736
Mll3	ENSMUSG00000038056	5	24777612	25004601
Cct8l1	ENSMUSG00000038044	5	25021885	25023839
4933427G23Rik	ENSMUSG00000086697	5	23321436	23337715
Gm3724	ENSMUSG00000061468	5	23624131	23624484
Gm9836	ENSMUSG00000081071	5	23762640	23762855
Gm15589	ENSMUSG00000086729	5	23839741	23843034
Gm15587	ENSMUSG00000086769	5	23872010	23889432
Gm10221	ENSMUSG00000067719	5	24087290	24087680
1700022A21Rik	ENSMUSG00000038165	5	24153502	24154557
Gm15552	ENSMUSG00000087314	5	24379362	24381752
4933426D04Rik	ENSMUSG00000086446	5	24408387	24412668
2900005J15Rik	ENSMUSG00000043833	5	24606801	24615927
Hspe1-ps3	ENSMUSG00000092344	5	24897426	24897702
Gm20432	ENSMUSG00000092181	5	24938854	24939103
Gm18343	ENSMUSG00000092510	5	24956123	24956726
2700038G22Rik	ENSMUSG00000086802	5	23356415	23360742
Gm16624	ENSMUSG00000084903	5	24202720	24210508
4831440E17Rik	ENSMUSG00000091303	5	25004885	25007359
U1	ENSMUSG00000065329	5	23341985	23342139
SNORD93	ENSMUSG00000080335	5	23216809	23216879
U6	ENSMUSG00000088696	5	23944304	23944404
AC134910.1	ENSMUSG00000093143	5	25030433	25030707
Snord93	ENSMUSG00000093321	5	23358028	23358098
AC116151.1	ENSMUSG00000077832	5	24674190	24674282
7SK	ENSMUSG00000089475	5	24326411	24326655
U1	ENSMUSG00000077387	5	25016683	25016853
Mir671	ENSMUSG00000076387	5	24097932	24098029
5S_rRNA	ENSMUSG00000088359	5	23180107	23180199
7SK	ENSMUSG00000088842	5	24694179	24694461
Slit2	ENSMUSG00000031558	5	48374394	48697521
Pacrgl	ENSMUSG00000029089	5	48763631	48779995
Kcnip4	ENSMUSG00000029088	5	48780741	49916143
4930518C09Rik	ENSMUSG00000092309	5	48394305	48396946
Gm20475	ENSMUSG00000092559	5	48397023	48399162
5730480H06Rik	ENSMUSG00000093459	5	48786812	48805533
Mir218-1	ENSMUSG00000065603	5	48615181	48615290
Sod3	ENSMUSG00000072941	5	52755185	52762644
Ccdc149	ENSMUSG00000045790	5	52765892	52766785
Lgi2	ENSMUSG00000039252	5	52924758	52957542
8030423F21Rik	ENSMUSG00000052295	5	52998789	53010250
Sepsecs	ENSMUSG00000029173	5	53031326	53060968
Pi4k2b	ENSMUSG00000029186	5	53132826	53160583
Zcchc4	ENSMUSG00000029179	5	53166648	53215904
Anapc4	ENSMUSG00000029176	5	53225254	53259036
Slc34a2	ENSMUSG00000029188	5	53429321	53462903
Sel1l3	ENSMUSG00000029189	5	53498323	53604691
1810013D10Rik	ENSMUSG00000061461	5	53658345	53674749
Rbpj	ENSMUSG00000039191	5	53947018	54048684
Cckar	ENSMUSG00000029193	5	54089015	54098943
Tbc1d19	ENSMUSG00000039178	5	54200866	54295619
Stim2	ENSMUSG00000039156	5	54389656	54512296
Gm17182	ENSMUSG00000090642	5	53438926	53440426
Gm15820	ENSMUSG00000081266	5	54485240	54486280
n-R5s172	ENSMUSG00000077696	5	53737498	53737611
SNORA42	ENSMUSG00000077757	5	53350590	53350701
5S_rRNA	ENSMUSG00000088646	5	53809812	53809921
n-R5s171	ENSMUSG00000077316	5	53534399	53534477
snoMe28S-Cm3227	ENSMUSG00000089535	5	54681415	54681497
Mad1l1	ENSMUSG00000029554	5	140484643	140797506
Ftsj2	ENSMUSG00000029557	5	140803628	140807852
Nudt1	ENSMUSG00000036639	5	140807814	140814091
Snx8	ENSMUSG00000029560	5	140816258	140865216
Eif3b	ENSMUSG00000056076	5	140895259	140919314
Chst12	ENSMUSG00000036599	5	140981504	141001678
Grifin	ENSMUSG00000036586	5	141039073	141041025
Lfng	ENSMUSG00000029570	5	141083295	141091497
Ttyh3	ENSMUSG00000036565	5	141096540	141124985
Iqce	ENSMUSG00000036555	5	141137781	141178332
Baat1	ENSMUSG00000000148	5	141180965	141195333
Amz1	ENSMUSG00000050022	5	141200081	141237393
Gna12	ENSMUSG00000000149	5	141234362	141306385
Card11	ENSMUSG00000036526	5	141348953	141476550
Sdk1	ENSMUSG00000039683	5	141717444	142691540
Gm6433	ENSMUSG00000083382	5	141743535	141744409
Gm16035	ENSMUSG00000084934	5	141849133	141856880
Gm16036	ENSMUSG00000085540	5	142071939	142091956
AC161570.1	ENSMUSG00000093344	5	141556385	141556463
U6	ENSMUSG00000089164	5	142042097	142042203
Foxk1	ENSMUSG00000056493	5	142877451	142937968
C330006K01Rik	ENSMUSG00000039623	5	142939885	142954669
Radil	ENSMUSG00000029576	5	142960793	143027052
Papolb	ENSMUSG00000074817	5	143001792	143006030
Mmd2	ENSMUSG00000039533	5	143038319	143084754
Wipi2	ENSMUSG00000029578	5	143105496	143146542
Daglb	ENSMUSG00000039206	5	144225361	144265310
Rac1	ENSMUSG00000001847	5	144266346	144288904
2810453I06Rik	ENSMUSG00000048910	5	144309574	144325393
2810453I06Rik	ENSMUSG00000083012	5	144309576	144325399
Cyth3	ENSMUSG00000018001	5	144383316	144471119
Usp42	ENSMUSG00000051306	5	144471194	144493149
Eif2ak1	ENSMUSG00000029613	5	144578657	144665125
Ankrd61	ENSMUSG00000029607	5	144651610	144658554
Aimp2	ENSMUSG00000029610	5	144663573	144670716
Pms2	ENSMUSG00000079109	5	144670833	144698178
Rsph10b2	ENSMUSG00000075569	5	144693904	144746588
Ccz1	ENSMUSG00000029617	5	144748785	144775722
Ocm	ENSMUSG00000029618	5	144780673	144787539
Lmtk2	ENSMUSG00000038970	5	144861305	144949073
Bhlha15	ENSMUSG00000052271	5	144951155	144955310
Tecpr1	ENSMUSG00000066621	5	144955311	144984484
Bri3	ENSMUSG00000047843	5	145005306	145207626
Baiap2l1	ENSMUSG00000038859	5	145025395	145118981
Nptx2	ENSMUSG00000059991	5	145306756	145318347
Tmem130	ENSMUSG00000043388	5	145496784	145522518
Trrap	ENSMUSG00000045482	5	145528961	145620647
Smurf1	ENSMUSG00000038780	5	145637364	145726716
Kpna7	ENSMUSG00000038770	5	145744388	145844899
Gm4871	ENSMUSG00000061707	5	145790469	145793633
1700018F24Rik	ENSMUSG00000029620	5	145803859	145806547
Arpc1a	ENSMUSG00000029621	5	145844699	145869630
Arpc1b	ENSMUSG00000029622	5	145875084	145891574
Pdap1	ENSMUSG00000029623	5	145889638	145901107
Bud31	ENSMUSG00000038722	5	145901231	145908947
Ptcd1	ENSMUSG00000029624	5	145908383	145927977
Cpsf4	ENSMUSG00000029625	5	145928082	145942910
Atp5j2	ENSMUSG00000038690	5	145944567	145952931
Zkscan14	ENSMUSG00000029627	5	145955815	145962751
Zkscan5	ENSMUSG00000055991	5	145965431	145982619
Zfp655	ENSMUSG00000007812	5	145992592	146008175
Zfp498	ENSMUSG00000070420	5	146044212	146052338
Cyp3a57	ENSMUSG00000070419	5	146106148	146151381
Cyp3a16	ENSMUSG00000038656	5	146197178	146230592
D130017N08Rik	ENSMUSG00000087189	5	144519194	144527999
Gm17135	ENSMUSG00000091351	5	144683446	144741860
2900089D17Rik	ENSMUSG00000087484	5	145002559	145017055
Gm15708	ENSMUSG00000086894	5	145037930	145041382
Gm15709	ENSMUSG00000083574	5	145167471	145167683
Gm6272	ENSMUSG00000082524	5	145484496	145484666
SNORA70	ENSMUSG00000088685	5	145535294	145535422
U6	ENSMUSG00000064963	5	144774867	144774970
AC127411.1	ENSMUSG00000093455	5	145957917	145958194
Cyp3a41b	ENSMUSG00000075552	5	146319544	146345599
Gm17725	ENSMUSG00000091555	6	51329709	51342776
Gm15055	ENSMUSG00000085412	6	52052948	52062531
Gm8078	ENSMUSG00000081979	6	52068241	52068890
Gm15052	ENSMUSG00000082781	6	52081777	52082045
Gm15051	ENSMUSG00000087658	6	52106901	52112118
5730446D14Rik	ENSMUSG00000056445	6	52115673	52119563
Gm15050	ENSMUSG00000087626	6	52122880	52124058
2700086A05Rik	ENSMUSG00000085696	6	52125216	52165075
9930038K12Rik	ENSMUSG00000092475	6	52178246	52180531
9930038K12Rik	ENSMUSG00000056583	6	52180079	52180529
Hoxa11as	ENSMUSG00000086427	6	52194392	52199798
Gm15053	ENSMUSG00000055408	6	52212769	52217597
5730457N03Rik	ENSMUSG00000086126	6	52258383	52264826
Gm8129	ENSMUSG00000059159	6	52296724	52296939
Gm15054	ENSMUSG00000084282	6	52307538	52307818
Hnrnpa2b1	ENSMUSG00000004980	6	51410433	51419893
Cbx3	ENSMUSG00000029836	6	51420359	51433703
Snx10	ENSMUSG00000038301	6	51473900	51540678
Skap2	ENSMUSG00000059182	6	51809165	51962548
Hoxa1	ENSMUSG00000029844	6	52105366	52108316
Hoxa2	ENSMUSG00000014704	6	52112350	52115412
RP23-103L13.8	ENSMUSG00000093412	6	52113358	52163338
Hoxa3	ENSMUSG00000079560	6	52118509	52163335
5730596B20Rik	ENSMUSG00000056468	6	52127497	52130850
Hoxa4	ENSMUSG00000000942	6	52139670	52141752
Hoxa3	ENSMUSG00000059723	6	52149150	52163335
Hoxa5	ENSMUSG00000038253	6	52151753	52154586
Hoxa6	ENSMUSG00000043219	6	52155430	52161355
Hoxa7	ENSMUSG00000038236	6	52164490	52171853
Hoxa9	ENSMUSG00000038227	6	52173099	52181088
Hoxa10	ENSMUSG00000000938	6	52181196	52190853
Hoxa11	ENSMUSG00000038210	6	52192107	52196213
Hoxa13	ENSMUSG00000038203	6	52207693	52210874
Evx1	ENSMUSG00000005503	6	52263492	52268372
Hibadh	ENSMUSG00000029776	6	52496222	52590383
Nfe2l3	ENSMUSG00000029832	6	51382669	51408767
G930045G22Rik	ENSMUSG00000073072	6	50796523	50828078
Tax1bp1	ENSMUSG00000004535	6	52663723	52716774
Mir148a	ENSMUSG00000065505	6	51219811	51219909
SNORA32	ENSMUSG00000064792	6	52589228	52589349
AC153877.1	ENSMUSG00000092936	6	51571631	51571707
Mir196b	ENSMUSG00000065443	6	52180080	52180164
Jazf1	ENSMUSG00000063568	6	52718791	53018625
Gm15572	ENSMUSG00000081872	6	52793103	52793695
SCARNA20	ENSMUSG00000089209	6	52960388	52960526
Gm17554	ENSMUSG00000090510	6	72903230	72907243
Gm20536	ENSMUSG00000092386	6	72559830	72566184
Gm15402	ENSMUSG00000079524	6	72649208	72655084
Reep1	ENSMUSG00000052852	6	71657555	71760704
Mrpl35	ENSMUSG00000052962	6	71762997	71773804
Immt	ENSMUSG00000052337	6	71781325	71827382
Gm16601	ENSMUSG00000086723	6	71911139	71913769
Ptcd3	ENSMUSG00000063884	6	71830642	71858756
Polr1a	ENSMUSG00000049553	6	71859047	71929350
St3gal5	ENSMUSG00000056091	6	72047607	72104564
Suclg1	ENSMUSG00000052738	6	73198376	73226905
4931417E11Rik	ENSMUSG00000056197	6	73418598	73419661
Dnahc6	ENSMUSG00000052861	6	72967600	73171645
Atoh8	ENSMUSG00000037621	6	72156171	72185571
Sftpb	ENSMUSG00000056370	6	72254619	72262926
Usp39	ENSMUSG00000056305	6	72268672	72295178
0610030E20Rik	ENSMUSG00000058706	6	72297311	72303152
Tmem150a	ENSMUSG00000055912	6	72305441	72309756
Rnf181	ENSMUSG00000055850	6	72309708	72312715
Vamp5	ENSMUSG00000073002	6	72318043	72330462
Vamp8	ENSMUSG00000050732	6	72335217	72340697
Gm17505	ENSMUSG00000091253	6	72342052	72343053
Gm17607	ENSMUSG00000079161	6	72349004	72349581
Ggcx	ENSMUSG00000053460	6	72364302	72380706
Mat2a	ENSMUSG00000053907	6	72382793	72389552
Sh2d6	ENSMUSG00000052631	6	72463638	72471628
Capg	ENSMUSG00000056737	6	72494385	72512977
Elmod3	ENSMUSG00000056698	6	72515916	72548407
Retsat	ENSMUSG00000056666	6	72548469	72558419
Tgoln1	ENSMUSG00000056429	6	72558426	72566994
Tcf7l1	ENSMUSG00000055799	6	72576372	72739248
Gm15401	ENSMUSG00000072999	6	72579282	72587711
Kcmf1	ENSMUSG00000055239	6	72791108	72849973
Tmsb10	ENSMUSG00000079523	6	72907341	72908742
AC122362.1	ENSMUSG00000092739	6	73342136	73342237
SNORA73	ENSMUSG00000065072	6	73091479	73091674
SNORD94	ENSMUSG00000080465	6	71832551	71832687
Gm15631	ENSMUSG00000085067	6	105624749	105627575
Il5ra	ENSMUSG00000005364	6	106660378	106695103
Trnt1	ENSMUSG00000013736	6	106719114	106732468
Crbn	ENSMUSG00000005362	6	106728243	106750068
Cntn4	ENSMUSG00000064293	6	105627654	106649304
U6	ENSMUSG00000064466	6	106951446	106951552
Obox2	ENSMUSG00000074369	7	15939386	15983894
Obox3	ENSMUSG00000066772	7	16065174	16225251
9330104G04Rik	ENSMUSG00000091869	7	17456703	17460235
Gm10679	ENSMUSG00000093643	7	16017011	16018949
Gm10678	ENSMUSG00000093435	7	16028347	16030285
Gm4014	ENSMUSG00000093397	7	16039672	16041382
RP23-163B8.3	ENSMUSG00000093421	7	16065523	16067130
Gm4016	ENSMUSG00000093719	7	16087171	16088118
Gm4018	ENSMUSG00000093513	7	16175002	16176709
Gm4023	ENSMUSG00000093420	7	16276999	16278709
RP24-370G23.10	ENSMUSG00000093683	7	16305115	16305481
Gm7235	ENSMUSG00000092576	7	16405228	16411054
RP24-370G23.7	ENSMUSG00000093678	7	16435663	16436065
Bbc3	ENSMUSG00000002083	7	16894965	16903554
Sae1	ENSMUSG00000052833	7	16905583	16973146
Zc3h4	ENSMUSG00000059273	7	16986230	17023043
Tmem160	ENSMUSG00000019158	7	17038128	17040838
Npas1	ENSMUSG00000001988	7	17041070	17062129
Grlf1	ENSMUSG00000058230	7	17079822	17200342
Ceacam15	ENSMUSG00000078795	7	17256680	17261054
Ceacam9	ENSMUSG00000007209	7	17307278	17311459
Ap2s1	ENSMUSG00000008036	7	17323759	17334643
Slc1a5	ENSMUSG00000001918	7	17366695	17383623
Fkrp	ENSMUSG00000048920	7	17394619	17400478
Strn4	ENSMUSG00000030374	7	17401238	17426280
Prkd2	ENSMUSG00000041187	7	17428283	17455810
Dact3	ENSMUSG00000078794	7	17460666	17472650
Gng8	ENSMUSG00000063594	7	17477135	17480784
Ptgir	ENSMUSG00000043017	7	17491839	17496254
Calm3	ENSMUSG00000019370	7	17500728	17509463
Pnmal2	ENSMUSG00000070802	7	17530031	17532427
Pnmal1	ENSMUSG00000041141	7	17545144	17547668
Ccdc8	ENSMUSG00000041117	7	17578057	17582864
Ppp5c	ENSMUSG00000003099	7	17589989	17613273
Hif3a	ENSMUSG00000004328	7	17616856	17647776
Psg16	ENSMUSG00000066760	7	17659389	17718799
Ceacam3	ENSMUSG00000053228	7	17735631	17749602
Psg29	ENSMUSG00000023159	7	17788826	17801105
Obox1	ENSMUSG00000054310	7	16097689	16142215
Obox5	ENSMUSG00000074366	7	16335483	16345149
Obox6	ENSMUSG00000041583	7	16418595	16425027
Crx	ENSMUSG00000041578	7	16451296	16465317
Crxos1	ENSMUSG00000074365	7	16467966	16489379
Sepw1	ENSMUSG00000041571	7	16502557	16507751
Gltscr2	ENSMUSG00000041560	7	16523187	16531457
Ehd2	ENSMUSG00000074364	7	16532326	16552916
Gltscr1	ENSMUSG00000070808	7	16556611	16584844
Zfp541	ENSMUSG00000078796	7	16657291	16681677
Napa	ENSMUSG00000006024	7	16683807	16703324
Kptn	ENSMUSG00000006021	7	16705244	16712865
Slc8a2	ENSMUSG00000030376	7	16715509	16745858
Meis3	ENSMUSG00000041420	7	16760439	16771859
Dhx34	ENSMUSG00000006019	7	16782496	16807386
Gpr77	ENSMUSG00000074361	7	16819934	16829503
C5ar1	ENSMUSG00000049130	7	16832092	16844889
Prr24	ENSMUSG00000091811	7	16857363	16859041
Ccdc9	ENSMUSG00000041375	7	16859391	16872144
U6	ENSMUSG00000064689	7	17538744	17538850
U6	ENSMUSG00000064745	7	17209924	17210026
AC150681.1	ENSMUSG00000093078	7	17295966	17296036
n-R5s151	ENSMUSG00000065893	7	17057162	17057280
U6	ENSMUSG00000075896	7	16280562	16280666
AC148990.1	ENSMUSG00000093249	7	16531597	16531839
U6	ENSMUSG00000075966	7	16178580	16178684
Snord23	ENSMUSG00000080478	7	16524111	16524219
U6atac	ENSMUSG00000080413	7	16820087	16820213
Gm6065	ENSMUSG00000063830	7	18377923	18378414
Psg-ps1	ENSMUSG00000090442	7	18257662	18267409
Ceacam5	ENSMUSG00000008789	7	18298601	18346475
Ceacam14	ENSMUSG00000023185	7	18397982	18401012
Gm5155	ENSMUSG00000078793	7	18457116	18504373
Ceacam11	ENSMUSG00000030368	7	18557473	18563905
Ceacam13	ENSMUSG00000057195	7	18595238	18604570
Ceacam12	ENSMUSG00000030366	7	18651278	18663335
AC151601.1	ENSMUSG00000084614	7	18046672	18046781
AC134475.1	ENSMUSG00000093207	7	18602601	18602701
AC138311.2	ENSMUSG00000077108	7	18196115	18196224
AC126443.1	ENSMUSG00000084594	7	18122326	18122435
AC138311.1	ENSMUSG00000077083	7	18203519	18203628
Igfl3	ENSMUSG00000066756	7	18761843	18767211
AC151983.1	ENSMUSG00000076355	7	18771038	18771138
Mill1	ENSMUSG00000054005	7	18830696	18851441
U7	ENSMUSG00000089483	7	18846813	18846875
Psg18	ENSMUSG00000003505	7	18931157	18940356
Psg28	ENSMUSG00000030373	7	19007887	19017404
Psg26	ENSMUSG00000070799	7	19059932	19069498
Psg25	ENSMUSG00000070798	7	19105053	19117576
Psg27	ENSMUSG00000070797	7	19141864	19152654
Psg23	ENSMUSG00000074359	7	19191692	19201850
Psg21	ENSMUSG00000070796	7	19232003	19242074
U6	ENSMUSG00000065313	7	19134434	19134540
AC151412.1	ENSMUSG00000076332	7	19003188	19003282
Psg20	ENSMUSG00000063305	7	19259456	19271534
Psg22	ENSMUSG00000044903	7	19303439	19312597
U6	ENSMUSG00000065368	7	19330452	19330558
Psg19	ENSMUSG00000004542	7	19374474	19383859
Psg17	ENSMUSG00000004540	7	19399286	19406956
Mill2	ENSMUSG00000040987	7	19425315	19444003
Fxyd7	ENSMUSG00000036578	7	31827536	31836481
Etv2	ENSMUSG00000006311	7	31418635	31421166
Lin37	ENSMUSG00000036845	7	31340460	31344857
G630030J09Rik	ENSMUSG00000085458	7	31934547	31937726
Tmem147	ENSMUSG00000006315	7	31512720	31514553
Gapdhs	ENSMUSG00000061099	7	31514799	31528700
Gm10988	ENSMUSG00000078767	7	30936893	30937764
Rps12-ps5	ENSMUSG00000081565	7	31048282	31048670
Nphs1as	ENSMUSG00000087009	7	31247183	31250610
Gm1082	ENSMUSG00000062132	7	31300141	31307212
Gm17104	ENSMUSG00000091271	7	31349756	31350375
Gm17077	ENSMUSG00000090357	7	31740844	31743023
Nphs1	ENSMUSG00000006649	7	31243334	31272242
Psenen	ENSMUSG00000036835	7	31346887	31348203
U2af1l4	ENSMUSG00000078765	7	31348320	31352979
4930479M11Rik	ENSMUSG00000049761	7	31455741	31456610
2200002J24Rik	ENSMUSG00000013083	7	31484802	31485399
Gm4883	ENSMUSG00000066620	7	31494755	31495282
Atp4a	ENSMUSG00000005553	7	31497228	31510554
Scn1b	ENSMUSG00000019194	7	31901544	31911964
Gramd1a	ENSMUSG00000001248	7	31915146	31936069
Abph	ENSMUSG00000062556	7	32075539	32076835
Abpe	ENSMUSG00000036521	7	32087780	32089996
Gm4362	ENSMUSG00000078754	7	32144057	32147091
Gm4684	ENSMUSG00000078758	7	32488798	32490776
Gm6662	ENSMUSG00000078759	7	32497684	32498997
Gm6666	ENSMUSG00000078383	7	32551971	32552438
Gm6669	ENSMUSG00000090339	7	32602129	32603133
Gm10169	ENSMUSG00000083669	7	30750237	30750584
Gm17440	ENSMUSG00000092079	7	30983649	30985908
Gm17478	ENSMUSG00000087359	7	31435404	31437730
Gm4673	ENSMUSG00000091324	7	31742428	31746638
Fxyd1	ENSMUSG00000036570	7	31836700	31840675
Lgi4	ENSMUSG00000036560	7	31844361	31855954
Fxyd3	ENSMUSG00000057092	7	31853191	31861723
Hpn	ENSMUSG00000001249	7	31883744	31900309
Sbsn	ENSMUSG00000046056	7	31536490	31541152
Dmkn	ENSMUSG00000060962	7	31548775	31566085
Krtdap	ENSMUSG00000074199	7	31572924	31576102
Ffar2	ENSMUSG00000051314	7	31603376	31608794
Ffar3	ENSMUSG00000019429	7	31639349	31641197
Ffar1	ENSMUSG00000044453	7	31645587	31646489
Cd22	ENSMUSG00000030577	7	31650421	31665361
Mag	ENSMUSG00000036634	7	31684202	31699851
Hamp2	ENSMUSG00000056978	7	31707391	31709200
Hamp	ENSMUSG00000050440	7	31727390	31729036
Usf2	ENSMUSG00000058239	7	31730271	31741822
Lsr	ENSMUSG00000001247	7	31742428	31768188
Fam187b	ENSMUSG00000046826	7	31758823	31774739
Fxyd5	ENSMUSG00000009687	7	31817741	31827500
Kirrel2	ENSMUSG00000036915	7	31232553	31242709
Cox6b1	ENSMUSG00000036751	7	31401993	31411170
Zbtb32	ENSMUSG00000006310	7	31374700	31383928
Upk1a	ENSMUSG00000006313	7	31388111	31397753
BC053749	ENSMUSG00000036864	7	31324153	31337315
Hspb6	ENSMUSG00000036854	7	31337197	31340462
Zfp420	ENSMUSG00000058402	7	30644998	30700678
Zfp27	ENSMUSG00000062040	7	30678352	30691591
Zfp74	ENSMUSG00000059975	7	30715834	30739108
C230062I16Rik	ENSMUSG00000063623	7	30738640	30741011
Zfp568	ENSMUSG00000074221	7	30768974	30813301
Zfp14	ENSMUSG00000053985	7	30823072	30829753
Gm10989	ENSMUSG00000078770	7	30839755	30840586
Zfp82	ENSMUSG00000058447	7	30841057	30857842
Zfp566	ENSMUSG00000078768	7	30862356	30875529
Zfp260	ENSMUSG00000049421	7	30879796	30892641
Zfp382	ENSMUSG00000074220	7	30906961	30919684
Zfp146	ENSMUSG00000037029	7	30946293	30954746
Gm5113	ENSMUSG00000066647	7	30954894	30965228
Cox7a1	ENSMUSG00000074218	7	30969190	30971047
Capns1	ENSMUSG00000001794	7	30971961	30980183
Tbcb	ENSMUSG00000006095	7	31009150	31017291
Polr2i	ENSMUSG00000019738	7	31016967	31018409
Ovol3	ENSMUSG00000056028	7	31018512	31020744
Wdr62	ENSMUSG00000037020	7	31025157	31065438
Arhgap33	ENSMUSG00000036882	7	31307245	31320079
Rbm42	ENSMUSG00000036733	7	31426013	31435336
Haus5	ENSMUSG00000078762	7	31426020	31450013
Thap8	ENSMUSG00000013928	7	31065113	31075256
Clip3	ENSMUSG00000013921	7	31076691	31093386
Alkbh6	ENSMUSG00000042831	7	31093736	31099323
AI428936	ENSMUSG00000019737	7	31099826	31104065
Sdhaf1	ENSMUSG00000074211	7	31106430	31107394
E130208F15Rik	ENSMUSG00000074210	7	31106759	31108491
Lrfn3	ENSMUSG00000036957	7	31140533	31147791
Tyrobp	ENSMUSG00000030579	7	31198807	31202596
Hcst	ENSMUSG00000064109	7	31202732	31204873
Nfkbid	ENSMUSG00000036931	7	31206751	31213765
Aplp1	ENSMUSG00000006651	7	31220001	31230580
Tmem149	ENSMUSG00000036826	7	31350446	31352981
Wbp7	ENSMUSG00000006307	7	31353877	31373745
Prodh2	ENSMUSG00000036892	7	31278641	31298421
AC149067.1	ENSMUSG00000093571	7	31096544	31096914
U2	ENSMUSG00000064982	7	31141751	31141943
AC164703.1	ENSMUSG00000093495	7	30885859	30885954
Gm5329	ENSMUSG00000078381	7	32757121	32757588
Gm17327	ENSMUSG00000090311	7	35009774	35015255
Pdcd2l	ENSMUSG00000002635	7	34969518	34981680
Gpi1	ENSMUSG00000036427	7	34987141	35015308
4931406P16Rik	ENSMUSG00000066571	7	35021726	35098570
Gm6096	ENSMUSG00000078380	7	35036057	35036512
Lsm14a	ENSMUSG00000066568	7	35129665	35174559
Kctd15	ENSMUSG00000030499	7	35424033	35440528
Chst8	ENSMUSG00000060402	7	35459487	35597730
Pepd	ENSMUSG00000063931	7	35697398	35829729
Cebpg	ENSMUSG00000056216	7	35831441	35841522
Cebpa	ENSMUSG00000034957	7	35904312	35906945
Slc7a10	ENSMUSG00000030495	7	35971404	35989917
Lrp3	ENSMUSG00000001802	7	35984852	36000389
Gm12770	ENSMUSG00000083568	7	34352272	34352733
Gm12771	ENSMUSG00000081155	7	34353175	34353309
Gm12767	ENSMUSG00000083381	7	34389283	34391071
Gm12772	ENSMUSG00000079892	7	34399641	34400826
Scgb2b1-ps	ENSMUSG00000083896	7	34410330	34412120
Gm12775	ENSMUSG00000079893	7	34420181	34421354
Gm12763	ENSMUSG00000085312	7	34438459	34444287
Rpl23a-ps12	ENSMUSG00000081825	7	34482289	34482756
Gm12782	ENSMUSG00000081714	7	34565836	34566562
Gm12768	ENSMUSG00000081510	7	34629955	34630713
Gm12777	ENSMUSG00000084296	7	34638075	34639837
Gm12757	ENSMUSG00000081317	7	34664314	34665113
Gm12765	ENSMUSG00000083085	7	34722280	34723256
Gm12759	ENSMUSG00000083942	7	34743824	34745005
Gm12773	ENSMUSG00000081962	7	34782018	34782604
Gm12755	ENSMUSG00000081768	7	34783031	34791480
Gm12760	ENSMUSG00000083434	7	34821466	34822451
Gm12779	ENSMUSG00000080947	7	34853574	34853765
Gm12778	ENSMUSG00000081491	7	34960731	34961063
Gm12783	ENSMUSG00000081161	7	34961777	34965023
Gm12762	ENSMUSG00000086526	7	35015439	35019094
Gm12758	ENSMUSG00000085105	7	35019396	35025226
Gm12774	ENSMUSG00000082684	7	35168678	35169093
Gm12764	ENSMUSG00000086184	7	35173684	35179798
Gm12766	ENSMUSG00000085124	7	35223156	35305904
Gm12780	ENSMUSG00000081863	7	35280440	35281084
Gm12784	ENSMUSG00000086631	7	35332225	35341223
Gm12781	ENSMUSG00000085923	7	35438203	35445435
Gm12756	ENSMUSG00000087127	7	35450432	35459018
Abpd	ENSMUSG00000061795	7	34149362	34151338
Gm5895	ENSMUSG00000090937	7	34158269	34159455
Gm4695	ENSMUSG00000092096	7	34312395	34313580
Abpz	ENSMUSG00000046438	7	34522209	34524331
Gm12769	ENSMUSG00000078753	7	34528811	34530122
Abpg	ENSMUSG00000066586	7	34728021	34730059
Abpb	ENSMUSG00000066584	7	34796951	34798961
Abpa	ENSMUSG00000066583	7	34806502	34807900
Gm12776	ENSMUSG00000078752	7	34880450	34885856
Wtip	ENSMUSG00000036459	7	34894562	34918287
Uba2	ENSMUSG00000052997	7	34925708	34954618
SNORA17	ENSMUSG00000077469	7	35728875	35729004
5S_rRNA	ENSMUSG00000088799	7	35886841	35886959
U7	ENSMUSG00000089086	7	34562609	34562673
BX537299.1	ENSMUSG00000077044	7	34593136	34593245
AC150683.1	ENSMUSG00000093715	7	36019779	36019847
AC149058.1	ENSMUSG00000093153	7	35866929	35866998
SNORA17	ENSMUSG00000088307	7	36002254	36002379
Slco2b1	ENSMUSG00000030737	7	106806314	106859850
Olfr520	ENSMUSG00000073998	7	106883655	106884605
Olfr521	ENSMUSG00000073997	7	106915674	106916640
F730035P03Rik	ENSMUSG00000053360	7	106928511	106929998
Neu3	ENSMUSG00000035239	7	106959949	106976927
Spcs2	ENSMUSG00000035227	7	106987513	107007403
Xrra1	ENSMUSG00000035211	7	107007728	107066334
Rnf169	ENSMUSG00000058761	7	107068764	107128968
Chrdl2	ENSMUSG00000030732	7	107154914	107183238
Pold3	ENSMUSG00000030726	7	107230621	107270075
Lipt2	ENSMUSG00000030725	7	107307787	107309875
Kcne3	ENSMUSG00000035165	7	107327207	107333374
Pgm2l1	ENSMUSG00000030729	7	107375904	107427378
P4ha3	ENSMUSG00000051048	7	107434030	107468209
Ppme1	ENSMUSG00000030718	7	107475247	107520406
C2cd3	ENSMUSG00000047248	7	107520743	107618668
Ucp3	ENSMUSG00000032942	7	107621499	107634941
Ucp2	ENSMUSG00000033685	7	107641846	107650529
Dnajb13	ENSMUSG00000030708	7	107651527	107663469
Chchd8	ENSMUSG00000044881	7	107685614	107688883
Mrpl48	ENSMUSG00000030706	7	107694265	107756811
D630004N19Rik	ENSMUSG00000052467	7	107694270	107696134
Rab6a	ENSMUSG00000030704	7	107755924	107789782
Plekhb1	ENSMUSG00000030701	7	107791406	107810928
Fam168a	ENSMUSG00000029461	7	107855165	107990142
Gm3200	ENSMUSG00000078636	7	107909319	107910320
Relt	ENSMUSG00000008318	7	107994362	108011960
Arhgef17	ENSMUSG00000032875	7	108018260	108080675
P2ry6	ENSMUSG00000048779	7	108086152	108112905
P2ry2	ENSMUSG00000032860	7	108145086	108160505
Fchsd2	ENSMUSG00000030691	7	108257289	108432919
Atg16l2	ENSMUSG00000047767	7	108437906	108450765
Stard10	ENSMUSG00000030688	7	108465600	108495140
Arap1	ENSMUSG00000032812	7	108496581	108561100
Pde2a	ENSMUSG00000030653	7	108570212	108661340
Art2a-ps	ENSMUSG00000092517	7	108700967	108709379
Art2b	ENSMUSG00000030651	7	108727374	108729675
Clpb	ENSMUSG00000001829	7	108812147	108943974
Rnf169	ENSMUSG00000092273	7	107083788	107114244
Gpx2-ps1	ENSMUSG00000089987	7	107413454	107413756
Gm15683	ENSMUSG00000081359	7	107728781	107729133
Gm14382	ENSMUSG00000082210	7	107773032	107773468
Gm6341	ENSMUSG00000083121	7	108303137	108303599
Gm15673	ENSMUSG00000082509	7	108386855	108387792
Gm20476	ENSMUSG00000092364	7	108466236	108474721
Gm7027	ENSMUSG00000067121	7	108721974	108722835
Mir139	ENSMUSG00000065446	7	108623890	108623957
Mir3102	ENSMUSG00000093296	7	108030820	108030923
Phox2a	ENSMUSG00000007946	7	108966827	108971680
Inppl1	ENSMUSG00000032737	7	108971147	108986740
Folr2	ENSMUSG00000032725	7	108988512	108993831
Folr1	ENSMUSG00000001827	7	109006845	109019302
3200002M19Rik	ENSMUSG00000030649	7	109029839	109050359
Tomt	ENSMUSG00000078630	7	109046887	109054873
2400001E08Rik	ENSMUSG00000030842	7	109054351	109060415
Lrrc51	ENSMUSG00000064307	7	109061498	109082409
Numa1	ENSMUSG00000066306	7	109082688	109163473
Il18bp	ENSMUSG00000070427	7	109163593	109166669
Rnf121	ENSMUSG00000070426	7	109167651	109213983
Trpc2	ENSMUSG00000070425	7	109214025	109245378
Art5	ENSMUSG00000070424	7	109245393	109251359
Art1	ENSMUSG00000030996	7	109250257	109259662
Chrna10	ENSMUSG00000066279	7	109259780	109265227
Nup98	ENSMUSG00000063550	7	109268968	109358634
Pgap2	ENSMUSG00000030990	7	109358722	109387081
Rhog	ENSMUSG00000073982	7	109387637	109398637
Stim1	ENSMUSG00000030987	7	109416338	109585362
Rrm1	ENSMUSG00000030978	7	109590209	109618285
Olfr543	ENSMUSG00000044814	7	109625287	109626416
Olfr544	ENSMUSG00000043925	7	109632621	109636821
Olfr545	ENSMUSG00000044824	7	109642337	109643287
Olfr547	ENSMUSG00000073979	7	109683263	109684202
Olfr548-ps1	ENSMUSG00000073978	7	109690452	109691384
Olfr549	ENSMUSG00000073977	7	109702800	109703750
Trim21	ENSMUSG00000030966	7	109706436	109713983
Olfr550	ENSMUSG00000073975	7	109726983	109728020
Olfr551	ENSMUSG00000073974	7	109736255	109737333
Olfr552	ENSMUSG00000073973	7	109752870	109753823
Olfr553	ENSMUSG00000073972	7	109762521	109763501
Olfr554	ENSMUSG00000073971	7	109788762	109789715
Olfr555	ENSMUSG00000073970	7	109807337	109808284
Olfr556	ENSMUSG00000073969	7	109818415	109819437
Trim68	ENSMUSG00000073968	7	109826094	109835840
Olfr557	ENSMUSG00000073967	7	109846730	109847786
Olfr558	ENSMUSG00000070423	7	109850845	109860568
Olfr33	ENSMUSG00000066273	7	109861910	109862925
Olfr559	ENSMUSG00000066272	7	109872003	109873024
Olfr78	ENSMUSG00000043366	7	109889235	109907985
Olfr561	ENSMUSG00000073966	7	109923009	109924079
Olfr564	ENSMUSG00000048469	7	109951994	109952944
Olfr566	ENSMUSG00000060888	7	110004835	110005785
Olfr568	ENSMUSG00000073965	7	110025636	110026577
Olfr569	ENSMUSG00000062142	7	110035721	110036665
Olfr570	ENSMUSG00000073964	7	110048856	110049900
Olfr571	ENSMUSG00000043310	7	110057383	110058351
Olfr572	ENSMUSG00000073963	7	110076144	110077100
Olfr573-ps1	ENSMUSG00000052785	7	110090202	110091089
Olfr574	ENSMUSG00000045824	7	110096981	110098021
Olfr575	ENSMUSG00000066269	7	110100968	110104134
Olfr576	ENSMUSG00000073962	7	110113616	110114827
Olfr577	ENSMUSG00000043354	7	110121566	110122504
Olfr578	ENSMUSG00000045792	7	110132735	110133676
Olfr582	ENSMUSG00000073961	7	110189995	110190954
Olfr583	ENSMUSG00000073960	7	110199814	110200773
Gm10602	ENSMUSG00000073985	7	108985265	108985877
Gm8556	ENSMUSG00000072481	7	109669011	109669538
SNORA17	ENSMUSG00000088888	7	109883096	109883228
AC167240.1	ENSMUSG00000093388	7	109029698	109029793
Agpat6	ENSMUSG00000031545	8	24283418	24318925
Nkx6-3	ENSMUSG00000063672	8	24263743	24269420
Gins4	ENSMUSG00000031546	8	24337082	24348140
Golga7	ENSMUSG00000015341	8	24351825	24367546
Gm16625	ENSMUSG00000084900	8	25532876	25550480
[truncated: 2,118 more rows]

## Sheet: longevityIgG3-FHA
Gene Name	Ensembl Gene ID	Chromosome	Start	End
Eya1	ENSMUSG00000025932	1	14159035	14300281
Msc	ENSMUSG00000025930	1	14743427	14746047
Gm9947	ENSMUSG00000054493	1	14745535	14748454
Trpa1	ENSMUSG00000032769	1	14862729	14908943
Gm10566	ENSMUSG00000073737	1	15258880	15259878
Kcnb2	ENSMUSG00000092083	1	15277340	15704376
Kcnb2	ENSMUSG00000090498	1	15702384	15706448
Terf1	ENSMUSG00000025925	1	15795739	15833551
Gm106	ENSMUSG00000032719	1	15843943	15882803
4930444P10Rik	ENSMUSG00000067795	1	16056060	16083406
Rpl7	ENSMUSG00000043716	1	16091376	16094743
Rdh10	ENSMUSG00000025921	1	16095855	16123815
Smt3h2-ps4	ENSMUSG00000081201	1	14829950	14830237
Rpl5-ps1	ENSMUSG00000082193	1	14855153	14856046
SNORA17	ENSMUSG00000077377	1	15747913	15748044
SNORA17	ENSMUSG00000088159	1	15009121	15009240
SNORA17	ENSMUSG00000088829	1	15676016	15676127
AC156988.1	ENSMUSG00000093057	1	14172659	14172758
7SK	ENSMUSG00000088943	1	15869611	15869913
Il17f	ENSMUSG00000041872	1	20767232	20774351
Mcm3	ENSMUSG00000041859	1	20793055	20810359
Paqr8	ENSMUSG00000025931	1	20880691	20929632
Efhc1	ENSMUSG00000041809	1	20941707	20980919
Tram2	ENSMUSG00000041779	1	20986377	21069310
Tmem14a	ENSMUSG00000025933	1	21208656	21220248
Gsta3	ENSMUSG00000025934	1	21230670	21255442
Gm4956	ENSMUSG00000025936	1	21275327	21288393
Khdc1a	ENSMUSG00000067750	1	21339722	21342281
Khdc1c	ENSMUSG00000041722	1	21358412	21360926
Khdc1b	ENSMUSG00000085079	1	21373637	21376465
Kcnq5	ENSMUSG00000028033	1	21388484	21952023
Rims1	ENSMUSG00000041670	1	22276332	22911673
Gm7094	ENSMUSG00000046847	1	21262484	21262990
Gm16329	ENSMUSG00000086194	1	21344086	21345197
Gm16327	ENSMUSG00000087453	1	21354884	21355111
Gm2709	ENSMUSG00000085507	1	21362751	21363845
Gm16533	ENSMUSG00000087427	1	21369636	21369863
Gm16328	ENSMUSG00000085679	1	21380987	21381182
Gm7658	ENSMUSG00000082935	1	21502014	21503137
6720483E21Rik	ENSMUSG00000087078	1	20878731	20880554
Gm16705	ENSMUSG00000085163	1	21949923	21952611
SNORA17	ENSMUSG00000088858	1	20832616	20832747
SNORA17	ENSMUSG00000077314	1	20905491	20905621
Gm9898	ENSMUSG00000053185	1	30775399	30776806
Phf3	ENSMUSG00000048874	1	30859187	30930539
Ptp4a1	ENSMUSG00000026064	1	30997148	31006615
Gm5698	ENSMUSG00000086151	1	31033795	31035810
Gm5699	ENSMUSG00000087346	1	31054712	31056750
4931428L18Rik	ENSMUSG00000086727	1	31197923	31279506
Lgsn	ENSMUSG00000050217	1	31233251	31261501
4930521A18Rik	ENSMUSG00000026063	1	31279684	31281132
Gm9458	ENSMUSG00000086726	1	31043070	31043798
Gm10307	ENSMUSG00000070960	1	31672836	31673507
AC126798.1	ENSMUSG00000077073	1	30042779	30042888
SNORA17	ENSMUSG00000077664	1	31316438	31316564
Carf	ENSMUSG00000026017	1	60155091	60207876
Nbeal1	ENSMUSG00000073664	1	60237443	60395172
Cyp20a1	ENSMUSG00000049439	1	60400167	60444904
Abi2	ENSMUSG00000026782	1	60466539	60537999
Raph1	ENSMUSG00000026014	1	60540080	60623948
Cd28	ENSMUSG00000026012	1	60773644	60830203
Ctla4	ENSMUSG00000026011	1	60943844	60972676
Icos	ENSMUSG00000026009	1	61034771	61057164
Gm15464	ENSMUSG00000082609	1	60174099	60174529
Gm11575	ENSMUSG00000081562	1	60579683	60579910
Gm11576	ENSMUSG00000084400	1	60593864	60594280
Gm11578	ENSMUSG00000082160	1	60649095	60649553
Gm11577	ENSMUSG00000084151	1	60757716	60758781
Eif4a-ps4	ENSMUSG00000082209	1	60760776	60761993
Gm11579	ENSMUSG00000086795	1	60833509	60838678
2310016D23Rik	ENSMUSG00000085965	1	60835687	60860634
Gm11609	ENSMUSG00000083118	1	60849334	60850676
Gm11581	ENSMUSG00000083355	1	60865960	60866786
Rpl18-ps1	ENSMUSG00000081382	1	60957742	60958266
Gm11582	ENSMUSG00000080800	1	61005074	61005309
Cdk15	ENSMUSG00000026023	1	59313750	59409837
Fzd7	ENSMUSG00000041075	1	59538991	59543791
Gm973	ENSMUSG00000047361	1	59573108	59691352
Sumo1	ENSMUSG00000026021	1	59696278	59727678
Nop58	ENSMUSG00000026020	1	59741853	59768968
Bmpr2	ENSMUSG00000067336	1	59821481	59927703
Fam117b	ENSMUSG00000041040	1	59969850	60042190
Ica1l	ENSMUSG00000026018	1	60045914	60099931
Wdr12	ENSMUSG00000026019	1	60133712	60155489
Als2	ENSMUSG00000026024	1	59219770	59294075
Als2cr11	ENSMUSG00000047383	1	59053967	59060287
Gm17570	ENSMUSG00000090590	1	59060795	59062069
Als2cr11	ENSMUSG00000072295	1	59107350	59151744
Als2cr4	ENSMUSG00000038079	1	59157438	59177203
Mpp4	ENSMUSG00000079550	1	59177780	59220233
Gm17453	ENSMUSG00000092149	1	59545324	59549449
Snord70	ENSMUSG00000077345	1	59748778	59748864
Snord11	ENSMUSG00000089093	1	59761633	59761718
SNORD11	ENSMUSG00000089512	1	59761105	59761179
AL683804.1	ENSMUSG00000088973	1	60670542	60670647
SNORA17	ENSMUSG00000077616	1	59127832	59127962
7SK	ENSMUSG00000089276	1	59683424	59683508
SNORD70	ENSMUSG00000077358	1	59749353	59749436
Rpl17-ps1	ENSMUSG00000082804	1	61132491	61133069
Gm11590	ENSMUSG00000082661	1	61178222	61180848
Gm11591	ENSMUSG00000080785	1	61253385	61254086
Gm11587	ENSMUSG00000085248	1	61363480	61364590
Mreg	ENSMUSG00000039395	1	72205807	72258881
Pecr	ENSMUSG00000026189	1	72305741	72330888
Tmem169	ENSMUSG00000026188	1	72330943	72349678
Xrcc5	ENSMUSG00000026187	1	72353995	72441526
March4	ENSMUSG00000039372	1	72473686	72583504
Smarcal1	ENSMUSG00000039354	1	72629825	72679708
Ankar	ENSMUSG00000039342	1	72689554	72747138
Rpl37a	ENSMUSG00000046330	1	72757834	72760383
Igfbp2	ENSMUSG00000039323	1	72871077	72899048
Igfbp5	ENSMUSG00000026185	1	72904506	72921458
Tnp1	ENSMUSG00000026182	1	73061657	73062473
Tns1	ENSMUSG00000055322	1	73956805	74171021
Gm15843	ENSMUSG00000085812	1	72506073	72506601
D230017M19Rik	ENSMUSG00000085769	1	72283039	72321443
AC120136.3	ENSMUSG00000093333	1	72301582	72301772
AC120136.2	ENSMUSG00000093247	1	72283520	72283710
AC120136.1	ENSMUSG00000093111	1	72290787	72290977
5S_rRNA	ENSMUSG00000088666	1	73810284	73810409
U2	ENSMUSG00000075752	1	72272814	72273004
Rufy4	ENSMUSG00000061815	1	74172115	74194797
Cxcr2	ENSMUSG00000026180	1	74200563	74207812
Cxcr1	ENSMUSG00000048480	1	74238359	74241205
Mir1928	ENSMUSG00000087820	1	74253128	74253194
U6	ENSMUSG00000075767	1	74259387	74259493
Arpc2	ENSMUSG00000006304	1	74283071	74314783
Gpbar1	ENSMUSG00000064272	1	74325124	74326198
Aamp	ENSMUSG00000006299	1	74326421	74331254
Pnkd	ENSMUSG00000026179	1	74331504	74400268
Tmbim1	ENSMUSG00000006301	1	74334821	74352196
Gm216	ENSMUSG00000073650	1	74408682	74415895
Slc11a1	ENSMUSG00000026177	1	74421777	74432636
Epha4	ENSMUSG00000026235	1	77363760	77511663
5S_rRNA	ENSMUSG00000089326	1	77141328	77141421
U1	ENSMUSG00000065215	1	77894858	77895021
Pax3	ENSMUSG00000004872	1	78097842	78193709
Sgpp2	ENSMUSG00000032908	1	78306921	78416861
Farsb	ENSMUSG00000026245	1	78414533	78485434
BC035947	ENSMUSG00000090486	1	78494381	78508538
Mogat1	ENSMUSG00000012187	1	78507566	78534748
Acsl3	ENSMUSG00000032883	1	78654400	78703562
Utp14b	ENSMUSG00000079470	1	78654613	78664163
Kcne4	ENSMUSG00000047330	1	78813502	78816599
Gm5830	ENSMUSG00000072978	1	78964212	78964654
Scg2	ENSMUSG00000050711	1	79431244	79436665
Ap1s3	ENSMUSG00000054702	1	79603451	79668547
SNORA17	ENSMUSG00000077782	1	79510314	79510439
Wdfy1	ENSMUSG00000073643	1	79698837	79772718
Mrpl44	ENSMUSG00000026248	1	79772593	79778020
Serpine2	ENSMUSG00000026249	1	79790772	79855271
Fam124b	ENSMUSG00000043230	1	80195281	80215048
Cul3	ENSMUSG00000004364	1	80261498	80337055
Gm6189	ENSMUSG00000090637	1	80379679	80381763
Dock10	ENSMUSG00000038608	1	80497648	80755128
9430031J16Rik	ENSMUSG00000054976	1	81073525	81338339
Gm5529	ENSMUSG00000067106	1	79919111	79920082
U6	ENSMUSG00000064589	1	80132041	80132147
Gm5530	ENSMUSG00000087008	1	81738560	81739544
Cntnap5b	ENSMUSG00000067028	1	101669342	102382519
Gm7110	ENSMUSG00000082431	1	101687006	101687602
AC111074.1	ENSMUSG00000077039	1	102758370	102758478
SNORA17	ENSMUSG00000087883	1	102149494	102149625
U6	ENSMUSG00000087804	1	100913941	100914040
SNORA17	ENSMUSG00000077295	1	104003026	104003157
SNORA17	ENSMUSG00000088510	1	104310500	104310598
Abl2	ENSMUSG00000026596	1	158488917	158579699
Tor3a	ENSMUSG00000060519	1	158583748	158604487
Fam20b	ENSMUSG00000033557	1	158608676	158649132
Ralgps2	ENSMUSG00000026594	1	158734297	158869757
Angptl1	ENSMUSG00000033544	1	158768693	158791209
1700057K13Rik	ENSMUSG00000026592	1	159029279	159038811
Rasal2	ENSMUSG00000070565	1	159065314	159342726
2810025M15Rik	ENSMUSG00000049881	1	159342483	159350366
BC026585	ENSMUSG00000033488	1	159388711	159419191
Sec16b	ENSMUSG00000026589	1	159436859	159498556
Fam5b	ENSMUSG00000004031	1	160175402	160286391
Astn1	ENSMUSG00000026587	1	160292471	160621917
Gm15428	ENSMUSG00000046057	1	158723643	158723975
Gm6058	ENSMUSG00000087632	1	159314062	159314460
Gm15486	ENSMUSG00000087093	1	159428006	159441852
Mir488	ENSMUSG00000070103	1	160435756	160435864
Pappa2	ENSMUSG00000073530	1	160641862	160887870
Smyd3	ENSMUSG00000055067	1	180882091	181448172
Gm5561	ENSMUSG00000075392	1	181450388	181451039
Tfb2m	ENSMUSG00000026492	1	181458186	181476398
Cnst	ENSMUSG00000038949	1	181476501	181557609
Sccpdh	ENSMUSG00000038936	1	181598341	181617320
Gm1305	ENSMUSG00000087236	1	181625428	181675316
Ahctf1	ENSMUSG00000026491	1	181675025	181733811
Gm10518	ENSMUSG00000073486	1	181733507	181734807
Cdc42bpa	ENSMUSG00000026490	1	181890603	182095734
Adck3	ENSMUSG00000026489	1	182095369	182129733
Psen2	ENSMUSG00000010609	1	182157135	182193569
Gm5069	ENSMUSG00000055676	1	182257102	182260681
Itpkb	ENSMUSG00000038855	1	182260607	182354933
6330403A02Rik	ENSMUSG00000053963	1	182362518	182413598
Parp1	ENSMUSG00000026496	1	182499086	182531384
Lin9	ENSMUSG00000058729	1	182571498	182620816
Mixl1	ENSMUSG00000026497	1	182623174	182627165
Acbd3	ENSMUSG00000026499	1	182656174	182684334
H3f3a	ENSMUSG00000060743	1	182730963	182744074
BC031781	ENSMUSG00000038806	1	182781282	182798228
Lefty2	ENSMUSG00000066652	1	182823239	182829234
Pycr2	ENSMUSG00000026520	1	182834405	182838218
Lefty1	ENSMUSG00000038793	1	182865153	182868531
Tmem63a	ENSMUSG00000026519	1	182872475	182905243
Ephx1	ENSMUSG00000038776	1	182906286	182951035
Gm17275	ENSMUSG00000090986	1	182732699	182739614
2210411M09Rik	ENSMUSG00000085563	1	182882195	182888280
Gm15480	ENSMUSG00000082395	1	181468548	181469066
Gm16067	ENSMUSG00000073485	1	182743907	182746990
U6	ENSMUSG00000084558	1	182762900	182763007
AC167020.1	ENSMUSG00000092967	1	182663926	182664013
9130409I23Rik	ENSMUSG00000038768	1	182981368	182990798
Nvl	ENSMUSG00000026516	1	183023554	183074288
Cnih4	ENSMUSG00000062169	1	183081062	183099125
Wdr26	ENSMUSG00000038733	1	183103359	183142109
A430110L20Rik	ENSMUSG00000054135	1	183156207	183158621
Cnih3	ENSMUSG00000026514	1	183282759	183390772
Rpl35a-ps2	ENSMUSG00000081214	1	183172076	183172498
Gm16547	ENSMUSG00000089888	1	183330595	183330887
Gm16539	ENSMUSG00000089927	1	183361854	183362531
Sycp2	ENSMUSG00000060445	2	178079998	178142390
Ppp1r3d	ENSMUSG00000049999	2	178145911	178149177
9030418K01Rik	ENSMUSG00000070476	2	178149229	178159133
Cdh26	ENSMUSG00000039155	2	178165236	178222071
4930591A17Rik	ENSMUSG00000039138	2	179149641	179151587
Cdh4	ENSMUSG00000000305	2	179177136	179634078
Gm10711	ENSMUSG00000074518	2	179628614	179629398
Taf4a	ENSMUSG00000039117	2	179646851	179711351
Lsm14b	ENSMUSG00000039108	2	179759692	179770170
Psma7	ENSMUSG00000027566	2	179771078	179777138
Ss18l1	ENSMUSG00000039086	2	179777214	179804906
Gtpbp5	ENSMUSG00000039069	2	179805293	179820607
Hrh3	ENSMUSG00000039059	2	179834170	179839193
Osbpl2	ENSMUSG00000039050	2	179854011	179897385
Adrm1	ENSMUSG00000039041	2	179906190	179910991
Lama5	ENSMUSG00000015647	2	179911078	179960564
Rps21	ENSMUSG00000039001	2	179992082	179993150
Cables2	ENSMUSG00000038990	2	179993245	180008201
BC066135	ENSMUSG00000038980	2	180012351	180024584
Gata5	ENSMUSG00000015627	2	180059838	180069404
Gm14318	ENSMUSG00000056061	2	180067562	180075437
Gm14314	ENSMUSG00000082215	2	178754824	178755838
Gm14292	ENSMUSG00000061897	2	178912130	178912585
Gm14293	ENSMUSG00000081481	2	178975195	178975771
Gm14294	ENSMUSG00000081882	2	179098998	179099748
Gm14300	ENSMUSG00000083410	2	179347327	179348272
4921531C22Rik	ENSMUSG00000085704	2	179710698	179713718
Gm14299	ENSMUSG00000082850	2	179727893	179728289
Gm17180	ENSMUSG00000090589	2	179834618	179836207
Mir3091	ENSMUSG00000092827	2	179992241	179992316
AL663067.1	ENSMUSG00000080507	2	179725502	179725587
Slco4a1	ENSMUSG00000038963	2	180190950	180209572
Ntsr1	ENSMUSG00000027568	2	180234681	180279685
1600027N09Rik	ENSMUSG00000027569	2	180316009	180321009
Ogfr	ENSMUSG00000049401	2	180323950	180330541
Col9a3	ENSMUSG00000027570	2	180332495	180356894
Tcfl5	ENSMUSG00000038932	2	180356661	180377413
Dido1	ENSMUSG00000038914	2	180392669	180444704
2310003C23Rik	ENSMUSG00000027573	2	180444822	180453438
Slc17a9	ENSMUSG00000023393	2	180459968	180476985
Bhlhe23	ENSMUSG00000045493	2	180509086	180511605
Ythdf1	ENSMUSG00000038848	2	180639082	180655654
Birc7	ENSMUSG00000038840	2	180663728	180668715
Nkain4	ENSMUSG00000027574	2	180669477	180689404
Arfgap1	ENSMUSG00000027575	2	180701930	180717231
9230112E08Rik	ENSMUSG00000070461	2	180718937	180720296
Col20a1	ENSMUSG00000016356	2	180721240	180752245
Chrna4	ENSMUSG00000027577	2	180753085	180778251
Kcnq2	ENSMUSG00000016346	2	180810284	180869996
Eef1a2	ENSMUSG00000016349	2	180882358	180891719
Ppdpf	ENSMUSG00000016344	2	180921952	180923476
Ptk6	ENSMUSG00000038751	2	180928426	180937494
Srms	ENSMUSG00000027579	2	180940267	180947890
BC051628	ENSMUSG00000047841	2	180954718	180957559
BC006779	ENSMUSG00000027580	2	180962320	180976732
Gmeb2	ENSMUSG00000038705	2	180986154	181022740
Stmn3	ENSMUSG00000027581	2	181041164	181049205
Rtel1	ENSMUSG00000038685	2	181054444	181091321
Arfrp1	ENSMUSG00000038671	2	181092395	181100109
Zgpat	ENSMUSG00000027582	2	181099633	181118333
Lime1	ENSMUSG00000090077	2	181114783	181118333
Zbtb46	ENSMUSG00000027583	2	181122467	181194131
Abhd16b	ENSMUSG00000055882	2	181227911	181229685
Tpd52l2	ENSMUSG00000000827	2	181231847	181252671
Dnajc5	ENSMUSG00000000826	2	181255190	181289838
Uckl1	ENSMUSG00000089917	2	181303854	181319597
Znf512b	ENSMUSG00000000823	2	181316808	181327508
Prpf6	ENSMUSG00000002455	2	181326573	181390365
Samd10	ENSMUSG00000038605	2	181329923	181333917
Sox18	ENSMUSG00000046470	2	181404541	181406345
Tcea2	ENSMUSG00000059540	2	181415015	181422776
Rgs19	ENSMUSG00000002458	2	181423124	181428682
4930526D03Rik	ENSMUSG00000045794	2	181431498	181433147
Oprl1	ENSMUSG00000027584	2	181449721	181455690
Myt1	ENSMUSG00000010505	2	181498037	181562502
Pcmtd2	ENSMUSG00000027589	2	181572559	181592166
Polr3k	ENSMUSG00000038628	2	181599042	181605535
Gm14496	ENSMUSG00000053277	2	181725841	181731135
B230312C02Rik	ENSMUSG00000084843	2	180105196	180120590
Gm14343	ENSMUSG00000087550	2	180500919	180510108
Gm14340	ENSMUSG00000074507	2	180553048	180559335
Gm14342	ENSMUSG00000086166	2	180564195	180624365
Gm14344	ENSMUSG00000085428	2	180571186	180583619
Gm14339	ENSMUSG00000085728	2	180582357	180583751
Gm14341	ENSMUSG00000087293	2	180689169	180701517
Gm14398	ENSMUSG00000083993	2	180951432	180952504
Gm14447	ENSMUSG00000084033	2	181026853	181027640
Slc2a4rg-ps	ENSMUSG00000085028	2	181118955	181122291
Gm16119	ENSMUSG00000010492	2	181313185	181319875
Gm14489	ENSMUSG00000082786	2	181458747	181459647
Gm5466	ENSMUSG00000083397	2	181631528	181633417
U1	ENSMUSG00000088378	2	181247255	181247417
U6	ENSMUSG00000089612	2	181160640	181160742
U6	ENSMUSG00000077518	2	181397011	181397117
Mir124a-3	ENSMUSG00000065454	2	180628736	180628822
HAR1F	ENSMUSG00000088334	2	180572532	180572663
U6	ENSMUSG00000084696	2	180918217	180918320
U6	ENSMUSG00000064422	2	180432768	180432874
Mir133a-2	ENSMUSG00000065460	2	180133084	180133187
Mir1a-1	ENSMUSG00000070144	2	180123753	180123829
Gm8935	ENSMUSG00000045699	3	12855996	12856403
Gm2464	ENSMUSG00000078587	3	13471906	13474596
Ralyl	ENSMUSG00000039717	3	13776848	14182287
U7	ENSMUSG00000088540	3	14401731	14401788
SNORA17	ENSMUSG00000089231	3	14267315	14267439
7SK	ENSMUSG00000088546	3	13845686	13845980
7SK	ENSMUSG00000084684	3	14029482	14029762
Slc7a12	ENSMUSG00000039710	3	14480697	14505830
Lrrcc1	ENSMUSG00000027550	3	14533788	14572658
Gm17119	ENSMUSG00000090300	3	14564402	14564681
E2f5	ENSMUSG00000027552	3	14578671	14606308
1810022K09Rik	ENSMUSG00000078784	3	14606320	14611221
Car13	ENSMUSG00000027555	3	14641727	14663002
Gm5843	ENSMUSG00000084092	3	14722416	14729626
Car1	ENSMUSG00000027556	3	14766217	14778459
Car3	ENSMUSG00000027559	3	14863538	14872351
Car2	ENSMUSG00000027562	3	14886426	14900769
Gm9733	ENSMUSG00000078783	3	15296551	15332302
Sirpb1a	ENSMUSG00000044138	3	15371656	15426520
Sirpb1b	ENSMUSG00000078781	3	15495754	15575065
Sirpb1c	ENSMUSG00000074677	3	15695145	15748528
Gm5150	ENSMUSG00000078780	3	15848070	15906332
Ythdf3	ENSMUSG00000047213	3	16083183	16117035
AC098884.1	ENSMUSG00000076975	3	15913818	15913927
RNaseP_nuc	ENSMUSG00000088874	3	16015615	16015943
Gm6634	ENSMUSG00000086538	3	70576301	70611213
Sis	ENSMUSG00000027790	3	72692479	72771785
U2	ENSMUSG00000084752	3	72541753	72541903
Slitrk3	ENSMUSG00000048304	3	72852048	72860865
7SK	ENSMUSG00000088794	3	73011625	73011923
AC131665.1	ENSMUSG00000077050	3	72950771	72950880
Bche	ENSMUSG00000027792	3	73439730	73512337
Col11a1	ENSMUSG00000027966	3	113733458	113923636
Olfm3	ENSMUSG00000027965	3	114606996	114828640
AC161513.1	ENSMUSG00000080676	3	115186934	115187054
SNORA17	ENSMUSG00000088346	3	115094472	115094603
SNORA17	ENSMUSG00000077410	3	114527072	114527203
S1pr1	ENSMUSG00000045092	3	115413351	115417973
Gm9889	ENSMUSG00000052769	3	115418068	115419645
Ppp3ca	ENSMUSG00000028161	3	136333088	136600691
Gm10955	ENSMUSG00000078574	3	136615239	136625603
Emcn	ENSMUSG00000054690	3	137004031	137095149
Gm4861	ENSMUSG00000055138	3	137213009	137215586
Ddit4l	ENSMUSG00000046818	3	137284576	137291297
H2afz	ENSMUSG00000037894	3	137527451	137529886
Dnajb14	ENSMUSG00000074212	3	137530639	137579521
Lamtor3	ENSMUSG00000091512	3	137581490	137591729
Dapp1	ENSMUSG00000028159	3	137593971	137644509
Gm5105	ENSMUSG00000049349	3	137711725	137730352
1110002E22Rik	ENSMUSG00000090066	3	137728016	137744376
Mttp	ENSMUSG00000028158	3	137752819	137806352
Rg9mtd2	ENSMUSG00000004127	3	137806412	137822785
4930579F01Rik	ENSMUSG00000012042	3	137827099	137849677
Adh7	ENSMUSG00000055301	3	137880787	137896346
Adh1	ENSMUSG00000074207	3	137923955	137953662
Adh6a	ENSMUSG00000053054	3	137976250	137994098
Gm15460	ENSMUSG00000081829	3	137567973	137568363
Gm16559	ENSMUSG00000089635	3	137944372	137969986
U6	ENSMUSG00000088932	3	137575954	137576052
U6	ENSMUSG00000064460	3	137378622	137378728
U6	ENSMUSG00000065906	3	136730856	136730962
AC140486.1	ENSMUSG00000080330	3	137284438	137284557
Gm6289	ENSMUSG00000074196	3	144542286	144558975
AI747448	ENSMUSG00000074195	3	144573885	144595493
Clca6	ENSMUSG00000068547	3	144615444	144638009
Clca3	ENSMUSG00000028255	3	144667501	144695740
Clca5	ENSMUSG00000036960	3	144733229	144762068
Odf2l	ENSMUSG00000028256	3	144781553	144816879
Col24a1	ENSMUSG00000028197	3	144955436	145214975
Znhit6	ENSMUSG00000074182	3	145239172	145268209
Cyr61	ENSMUSG00000028195	3	145309935	145312949
Ddah1	ENSMUSG00000028194	3	145421639	145557241
Bcl10	ENSMUSG00000028191	3	145587322	145597247
2410004B18Rik	ENSMUSG00000036873	3	145600978	145607793
Syde2	ENSMUSG00000036863	3	145650834	145684684
Wdr63	ENSMUSG00000043020	3	145703490	145771094
Mcoln3	ENSMUSG00000036853	3	145780423	145804770
Mcoln2	ENSMUSG00000011008	3	145812797	145858477
Lpar3	ENSMUSG00000036832	3	145883925	145949178
Ssx2ip	ENSMUSG00000036825	3	146067606	146103103
Dnase2b	ENSMUSG00000028185	3	146067777	146259576
Ctbs	ENSMUSG00000028189	3	146113434	146128813
Spata1	ENSMUSG00000028188	3	146120167	146162717
Gng5	ENSMUSG00000068523	3	146162798	146168536
Rpf1	ENSMUSG00000028187	3	146169312	146184387
Uox	ENSMUSG00000028186	3	146260041	146295269
4930503B20Rik	ENSMUSG00000090202	3	146308157	146314281
Samd13	ENSMUSG00000048652	3	146308159	146348556
Prkacb	ENSMUSG00000005034	3	146392543	146475924
Gm10288	ENSMUSG00000070343	3	146501775	146502311
Ttll7	ENSMUSG00000036745	3	146515331	146646973
Gm16233	ENSMUSG00000085773	3	144610525	144617842
Gm16325	ENSMUSG00000085810	3	146304896	146314679
Gm17501	ENSMUSG00000090771	3	145313276	145315057
U1	ENSMUSG00000065937	3	145779066	145779218
U6	ENSMUSG00000088218	3	146050706	146050808
AC124987.1	ENSMUSG00000077892	3	146062098	146062181
Zcchc7	ENSMUSG00000035649	4	44768749	44945087
Grhpr	ENSMUSG00000035637	4	44994267	45003606
Zbtb5	ENSMUSG00000049657	4	45004114	45025284
1700055D18Rik	ENSMUSG00000070997	4	45025702	45027271
Polr1e	ENSMUSG00000028318	4	45031455	45049437
Fbxo10	ENSMUSG00000048232	4	45047119	45097476
Tomm5	ENSMUSG00000078713	4	45118080	45120986
Gm10982	ENSMUSG00000078712	4	45122633	45126807
Frmpd1	ENSMUSG00000035615	4	45197747	45298808
Rg9mtd3	ENSMUSG00000035601	4	45309999	45329003
Exosc3	ENSMUSG00000028322	4	45329485	45355604
Dcaf10	ENSMUSG00000035572	4	45354973	45392631
Mcart1	ENSMUSG00000045973	4	45408795	45421633
Mcart1	ENSMUSG00000090906	4	45421051	45421623
Shb	ENSMUSG00000044813	4	45436150	45545342
Aldh1b1	ENSMUSG00000035561	4	45811894	45817476
Igfbpl1	ENSMUSG00000035551	4	45822340	45839795
1300002K09Rik	ENSMUSG00000028327	4	45861536	45899880
E230008N13Rik	ENSMUSG00000035539	4	45903175	45963639
Tdrd7	ENSMUSG00000035517	4	45978206	46047633
Tmod1	ENSMUSG00000028328	4	46051807	46128904
Tstd2	ENSMUSG00000035495	4	46127618	46151566
Ncbp1	ENSMUSG00000028330	4	46151485	46185275
Xpa	ENSMUSG00000028329	4	46168219	46209183
Foxe1	ENSMUSG00000070990	4	46356481	46359284
5830415F09Rik	ENSMUSG00000028331	4	46389377	46402309
Hemgn	ENSMUSG00000028332	4	46406861	46426378
Anp32b	ENSMUSG00000028333	4	46463774	46485529
Nans	ENSMUSG00000028334	4	46502120	46516504
Trim14	ENSMUSG00000039853	4	46506653	46549013
Coro2a	ENSMUSG00000028337	4	46549809	46615074
Tbc1d2	ENSMUSG00000039813	4	46617262	46663081
Gabbr2	ENSMUSG00000039809	4	46675190	47004745
Gm12447	ENSMUSG00000080816	4	46340168	46340637
Gm12443	ENSMUSG00000082242	4	46432852	46433174
Gm16731	ENSMUSG00000085990	4	46548773	46552674
Gm12678	ENSMUSG00000084854	4	44956625	44961202
Gm12493	ENSMUSG00000086000	4	44980641	44983968
Gm12679	ENSMUSG00000086205	4	44983448	44991191
Gm12566	ENSMUSG00000082628	4	45149122	45149480
2900093L17Rik	ENSMUSG00000086284	4	45247595	45256862
Gm12585	ENSMUSG00000083541	4	45351617	45351906
Gm12411	ENSMUSG00000081559	4	45562889	45563371
Gm12408	ENSMUSG00000085980	4	45652808	45655176
Gm829	ENSMUSG00000073860	4	45696461	45736210
Gm12410	ENSMUSG00000085305	4	45728041	45729293
Gm12409	ENSMUSG00000085876	4	45775249	45777095
Gm12412	ENSMUSG00000083685	4	45789754	45790081
Gm12444	ENSMUSG00000082194	4	46255886	46256771
Gm12445	ENSMUSG00000081483	4	46286691	46287712
Gm12446	ENSMUSG00000087383	4	46312879	46358387
SNORA36	ENSMUSG00000064410	4	46508027	46508157
U6	ENSMUSG00000065322	4	45561615	45561721
AL806523.1	ENSMUSG00000092924	4	46208251	46208358
7SK	ENSMUSG00000088069	4	46131052	46131318
AL772376.2	ENSMUSG00000093185	4	45409866	45409990
AL772376.1	ENSMUSG00000088892	4	45513357	45513424
AL805896.1	ENSMUSG00000093332	4	44878179	44878303
Anks6	ENSMUSG00000066191	4	47028541	47070178
Galnt12	ENSMUSG00000039774	4	47104781	47135942
Col15a1	ENSMUSG00000028339	4	47221033	47326039
Tgfbr1	ENSMUSG00000007613	4	47366094	47427803
Alg2	ENSMUSG00000039740	4	47477939	47487205
Sec61b	ENSMUSG00000053317	4	47487530	47496114
Gm568	ENSMUSG00000048824	4	47021188	47023653
Gm12425	ENSMUSG00000081561	4	47054470	47054832
Gm12422	ENSMUSG00000084199	4	47084518	47084819
Gm12424	ENSMUSG00000081785	4	47113904	47114350
Gm12423	ENSMUSG00000083491	4	47184541	47184675
Gm12426	ENSMUSG00000087500	4	47210359	47221331
Gm12430	ENSMUSG00000081152	4	47466504	47467825
Gm11262	ENSMUSG00000083629	4	78343556	78344832
Gm12913	ENSMUSG00000082697	4	78419581	78420125
Gm11263	ENSMUSG00000083496	4	78973612	78974360
Gm11409	ENSMUSG00000084248	4	79520255	79520657
Gm11407	ENSMUSG00000082179	4	79648235	79649292
Gm11408	ENSMUSG00000083076	4	79649300	79649818
Gm11410	ENSMUSG00000083219	4	79649893	79651035
Gm11406	ENSMUSG00000082555	4	80086302	80086785
Gm11247	ENSMUSG00000083578	4	80229883	80230190
SNORA17	ENSMUSG00000089543	4	78890491	78890613
Mpdz	ENSMUSG00000028402	4	80924404	81088719
Nfib	ENSMUSG00000008575	4	81936077	82351654
Zdhhc21	ENSMUSG00000028403	4	82444642	82505862
Cer1	ENSMUSG00000038192	4	82527655	82531052
Frem1	ENSMUSG00000059049	4	82543825	82698243
Gm11765	ENSMUSG00000081391	4	81101847	81107636
Gm11411	ENSMUSG00000083385	4	81342345	81343063
Gm11412	ENSMUSG00000087540	4	81389050	81392605
Gm12914	ENSMUSG00000087608	4	81576382	81578278
Gm11264	ENSMUSG00000087110	4	81679216	81711794
Gm5860	ENSMUSG00000085022	4	81711335	81748712
Gm11266	ENSMUSG00000087413	4	82153920	82193196
Gm11267	ENSMUSG00000084851	4	82230952	82233223
Gm11268	ENSMUSG00000084357	4	82288304	82288570
Gm11269	ENSMUSG00000086293	4	82338709	82339615
Gm11248	ENSMUSG00000082637	4	82767386	82767666
n-R5s187	ENSMUSG00000084718	4	81564417	81564527
SNORA17	ENSMUSG00000077607	4	80984178	80984308
n-R5s188	ENSMUSG00000084595	4	82085314	82085418
SNORA17	ENSMUSG00000089409	4	82724415	82724533
AL591611.1	ENSMUSG00000092661	4	81707016	81707125
Ttc39b	ENSMUSG00000038172	4	82866204	82970159
Snapc3	ENSMUSG00000028483	4	83063628	83113580
Psip1	ENSMUSG00000028484	4	83101584	83132363
Gm11185	ENSMUSG00000083245	4	82839892	82840898
Gm11413	ENSMUSG00000086321	4	83024221	83036572
Gm11184	ENSMUSG00000087592	4	83028968	83038109
U6	ENSMUSG00000064951	4	82931708	82931814
Gm10154	ENSMUSG00000066116	4	83151051	83151458
4930473A06Rik	ENSMUSG00000052407	4	83171449	83510635
Gm11414	ENSMUSG00000082416	4	83146403	83146665
Cbx3-ps3	ENSMUSG00000080793	4	83346988	83347940
Gm11415	ENSMUSG00000085378	4	83530642	83534762
U4	ENSMUSG00000064606	4	83173532	83173672
Adamtsl1	ENSMUSG00000066113	4	85699819	86074289
Fam154a	ENSMUSG00000028492	4	86090545	86204232
Rraga	ENSMUSG00000070934	4	86221577	86223185
Haus6	ENSMUSG00000038047	4	86224759	86257959
Plin2	ENSMUSG00000028494	4	86294290	86315964
Dennd4c	ENSMUSG00000038024	4	86394459	86496507
Rps6	ENSMUSG00000028495	4	86500564	86503316
Acer2	ENSMUSG00000038007	4	86520300	86580726
Acer2	ENSMUSG00000091609	4	86576595	86580724
Slc24a2	ENSMUSG00000037996	4	86629028	86876381
Mllt3	ENSMUSG00000028496	4	87415829	87679268
BC057079	ENSMUSG00000038368	4	87740533	88056915
Gm12550	ENSMUSG00000083272	4	86087917	86088245
4930457A20Rik	ENSMUSG00000085108	4	86204350	86205708
Gm12551	ENSMUSG00000081169	4	86272979	86277155
Gm12630	ENSMUSG00000082969	4	86463698	86464481
Gm12600	ENSMUSG00000086512	4	86944266	86947174
Gm12604	ENSMUSG00000082443	4	87226693	87227464
Gm12631	ENSMUSG00000084809	4	87679405	87680902
Gm12646	ENSMUSG00000081530	4	87689708	87689945
U6	ENSMUSG00000077597	4	86155056	86155129
Mir491	ENSMUSG00000070077	4	87767944	87768029
AL806517.1	ENSMUSG00000093065	4	87078176	87078240
Scarna8	ENSMUSG00000088958	4	86232357	86232487
E130114P18Rik	ENSMUSG00000048747	4	97234824	97444769
Nfia	ENSMUSG00000028565	4	97439425	97868605
Tm2d1	ENSMUSG00000028563	4	98022061	98049997
Inadl	ENSMUSG00000061859	4	98062476	98386294
L1td1	ENSMUSG00000087166	4	98393425	98405171
Kank4	ENSMUSG00000035407	4	98421589	98484228
I0C0044D17Rik	ENSMUSG00000073794	4	98485166	98490531
Usp1	ENSMUSG00000028560	4	98590501	98602234
Dock7	ENSMUSG00000028556	4	98603356	98787606
Angptl3	ENSMUSG00000028553	4	98697645	98712802
Atg4c	ENSMUSG00000028550	4	98860625	98926478
Gm10305	ENSMUSG00000070892	4	98939362	98941836
Gm12689	ENSMUSG00000070891	4	98962591	98963382
Gm12696	ENSMUSG00000084159	4	97188119	97189023
Gm12697	ENSMUSG00000082683	4	97223095	97223761
Gm12676	ENSMUSG00000085710	4	97420859	97424080
Gm12691	ENSMUSG00000081096	4	97812835	97813290
Gm12692	ENSMUSG00000082388	4	97901436	97901981
Gm12787	ENSMUSG00000083644	4	97934774	97935266
0610025J13Rik	ENSMUSG00000046683	4	97988089	97998482
Gm12788	ENSMUSG00000082144	4	98019118	98019425
Gm12846	ENSMUSG00000081046	4	98331057	98332828
Gm17376	ENSMUSG00000090718	4	98412426	98412513
A730085A09Rik	ENSMUSG00000085843	4	98460459	98465591
Gm12851	ENSMUSG00000084188	4	98522305	98522725
Gm12852	ENSMUSG00000081733	4	98769751	98770469
Gm12705	ENSMUSG00000087395	4	98783105	98784992
Gm12681	ENSMUSG00000086498	4	98813605	98828333
Gm12685	ENSMUSG00000081184	4	99085189	99085402
Gm12686	ENSMUSG00000082442	4	99085464	99085860
Gm12684	ENSMUSG00000081150	4	99096947	99097945
AL627124.1	ENSMUSG00000076294	4	98328328	98328423
Y_RNA	ENSMUSG00000064883	4	97942416	97942529
U6	ENSMUSG00000088548	4	98050093	98050182
AL671229.1	ENSMUSG00000093123	4	98224431	98224556
AL671140.1	ENSMUSG00000093135	4	98025885	98025994
Gm12683	ENSMUSG00000080803	4	99186743	99187157
Foxd3	ENSMUSG00000067261	4	99322990	99325362
Alg6	ENSMUSG00000073792	4	99382355	99430151
Itgb3bp	ENSMUSG00000028549	4	99432093	99602418
Gm10967	ENSMUSG00000078631	4	99439047	99441197
Efcab7	ENSMUSG00000073791	4	99495889	99585393
Pgm2	ENSMUSG00000025791	4	99602019	99659899
Ror1	ENSMUSG00000035305	4	99768396	100117370
Gm12690	ENSMUSG00000087332	4	99236191	99239702
Gm12687	ENSMUSG00000083698	4	99282508	99283213
Gm12688	ENSMUSG00000086096	4	99320298	99321674
Gm12682	ENSMUSG00000086592	4	99329232	99379663
Gm12702	ENSMUSG00000085142	4	99725125	99738589
Gm12701	ENSMUSG00000086385	4	99792226	99793446
U4	ENSMUSG00000084478	4	99582402	99582483
BX005053.1	ENSMUSG00000092763	4	99324433	99324521
Ube2u	ENSMUSG00000069733	4	100151465	100222752
Cachd1	ENSMUSG00000028532	4	100449280	100701825
Gm10577	ENSMUSG00000073789	4	100692903	100693301
Gm10576	ENSMUSG00000073788	4	100727163	100727867
Raver2	ENSMUSG00000035275	4	100741588	100824975
Jak1	ENSMUSG00000028530	4	100824972	100937887
Gm12706	ENSMUSG00000080967	4	100033967	100034664
Gm12698	ENSMUSG00000085871	4	100195852	100200406
Gm12699	ENSMUSG00000081553	4	100239713	100240653
Gm12700	ENSMUSG00000082601	4	100253883	100254339
U7	ENSMUSG00000088551	4	100776193	100776255
U6	ENSMUSG00000077677	4	100859369	100859472
Gm12785	ENSMUSG00000082928	4	100883021	100883192
U1	ENSMUSG00000065279	4	100943748	100943911
Gm12801	ENSMUSG00000085863	4	100956826	100957808
Gm12796	ENSMUSG00000085721	4	100965019	100994350
Gm12793	ENSMUSG00000081621	4	101013962	101014253
E130102H24Rik	ENSMUSG00000086782	4	101019136	101028853
Mir101a	ENSMUSG00000065451	4	101019550	101019632
0610043K17Rik	ENSMUSG00000087361	4	101026388	101071786
Gm12795	ENSMUSG00000083614	4	101034782	101035495
Gm12798	ENSMUSG00000084758	4	101075686	101080461
Ak4	ENSMUSG00000028527	4	101091882	101140376
Dnajc6	ENSMUSG00000028528	4	101169253	101315404
7SK	ENSMUSG00000089446	4	101227700	101227973
Leprot	ENSMUSG00000035212	4	101320323	101331969
Lepr	ENSMUSG00000057722	4	101390009	101487957
Prkaa2	ENSMUSG00000028518	4	104702479	104782495
Ppap2b	ENSMUSG00000028517	4	104829952	104905369
Usp24	ENSMUSG00000028514	4	105988818	106113927
Pcsk9	ENSMUSG00000044254	4	106114934	106136934
Bsnd	ENSMUSG00000025418	4	106156061	106164888
Dhcr24	ENSMUSG00000034926	4	106233643	106261718
BC055111	ENSMUSG00000054362	4	106263514	106289846
Ttc22	ENSMUSG00000034919	4	106295037	106312794
Pars2	ENSMUSG00000043572	4	106323674	106327887
Ttc4	ENSMUSG00000025413	4	106334861	106351549
Heatr8	ENSMUSG00000047502	4	106353022	106403530
Fam151a	ENSMUSG00000034871	4	106406494	106420897
Acot11	ENSMUSG00000034853	4	106417160	106477603
Ssbp3	ENSMUSG00000061887	4	106583306	106722299
Gm12722	ENSMUSG00000081819	4	105047059	105047551
Gm12723	ENSMUSG00000083128	4	105183837	105184287
Gm12726	ENSMUSG00000082061	4	105250945	105251545
Gm12728	ENSMUSG00000083780	4	105466824	105467316
Gm12729	ENSMUSG00000085790	4	105761319	105777673
Gm12727	ENSMUSG00000082768	4	105771529	105771887
Gm12725	ENSMUSG00000081189	4	105808716	105810383
Gm12724	ENSMUSG00000086249	4	105913821	105962631
Gm12731	ENSMUSG00000082958	4	105929636	105929903
Gm12730	ENSMUSG00000087051	4	105963874	105964860
Tmem61	ENSMUSG00000085933	4	106171421	106178940
2700068H02Rik	ENSMUSG00000086172	4	106227274	106230502
Gm12744	ENSMUSG00000085023	4	106259702	106261713
Gm12745	ENSMUSG00000081110	4	106447421	106447634
Gm12746	ENSMUSG00000086940	4	106514366	106520525
Gm12786	ENSMUSG00000085581	4	106690540	106695104
7SK	ENSMUSG00000089065	4	105648180	105648490
SNORA76	ENSMUSG00000087933	4	105791573	105791685
AL929466.1	ENSMUSG00000092635	4	104750328	104750596
Mrpl37	ENSMUSG00000028622	4	106728479	106739473
Cyb5rl	ENSMUSG00000028621	4	106739593	106760873
Cdcp2	ENSMUSG00000047636	4	106769496	106780353
2210012G02Rik	ENSMUSG00000028619	4	106806760	106851721
Tmem59	ENSMUSG00000028618	4	106851004	106873601
Gm12802	ENSMUSG00000085304	4	106799218	106808857
Ipp	ENSMUSG00000028696	4	116180154	116210848
Tmem69	ENSMUSG00000055900	4	116224238	116228541
Gpbp1l1	ENSMUSG00000034042	4	116230263	116266505
Ccdc17	ENSMUSG00000034035	4	116269259	116272871
Nasp	ENSMUSG00000028693	4	116273657	116300556
Akr1a1	ENSMUSG00000028692	4	116309115	116324285
Prdx1	ENSMUSG00000028691	4	116358149	116373427
Mmachc	ENSMUSG00000028690	4	116374884	116381011
Ccdc163	ENSMUSG00000028689	4	116381114	116423811
Tesk2	ENSMUSG00000033985	4	116393553	116478561
Toe1	ENSMUSG00000028688	4	116466915	116480245
Mutyh	ENSMUSG00000028687	4	116480328	116492045
Hpdl	ENSMUSG00000043155	4	116492512	116494113
Zswim5	ENSMUSG00000033948	4	116549981	116661869
Urod	ENSMUSG00000028684	4	116662570	116667018
Hectd3	ENSMUSG00000046861	4	116667922	116677882
Eif2b3	ENSMUSG00000028683	4	116692007	116759911
Ptch2	ENSMUSG00000028681	4	116768680	116788706
Btbd19	ENSMUSG00000073771	4	116791824	116798271
Tctex1d4	ENSMUSG00000047671	4	116799399	116801343
Plk3	ENSMUSG00000028680	4	116801260	116806568
Rps8	ENSMUSG00000047675	4	116826432	116828848
Kif2c	ENSMUSG00000028678	4	116832244	116855244
Gm1661	ENSMUSG00000060268	4	116885938	116924730
Tmem53	ENSMUSG00000048772	4	116924556	116941187
Rnf220	ENSMUSG00000028677	4	116944068	117169657
Eri3	ENSMUSG00000033423	4	117222970	117346902
Dmap1	ENSMUSG00000009640	4	117347286	117354878
Klf17	ENSMUSG00000048626	4	117430441	117438253
Slc6a9	ENSMUSG00000028542	4	117507111	117547803
Ccdc24	ENSMUSG00000078588	4	117539129	117545162
B4galt2	ENSMUSG00000028541	4	117541865	117556092
Atp6v0b	ENSMUSG00000033379	4	117556931	117559938
Dph2	ENSMUSG00000028540	4	117561248	117564637
Ipo13	ENSMUSG00000033365	4	117567091	117587604
Artn	ENSMUSG00000028539	4	117598767	117602368
St3gal3	ENSMUSG00000028538	4	117604759	117807519
Kdm4a	ENSMUSG00000033326	4	117809562	117852648
Ptprf	ENSMUSG00000033295	4	117880818	117964010
Hyi	ENSMUSG00000006395	4	118032595	118035349
Szt2	ENSMUSG00000033253	4	118035348	118081878
Med8	ENSMUSG00000006392	4	118081942	118088387
Elovl1	ENSMUSG00000006390	4	118100698	118105558
Cdc20	ENSMUSG00000006398	4	118105506	118109957
Mpl	ENSMUSG00000006389	4	118115020	118130118
Tie1	ENSMUSG00000033191	4	118143796	118162666
Gm12953	ENSMUSG00000087299	4	116224345	116225232
C530005A16Rik	ENSMUSG00000085408	4	116262338	116270235
Gm12996	ENSMUSG00000086417	4	116497508	116503208
Rpl36-ps8	ENSMUSG00000075390	4	116512512	116512826
Gm12994	ENSMUSG00000082841	4	116525269	116525715
Gm12993	ENSMUSG00000082063	4	116547193	116548070
Gm12998	ENSMUSG00000082207	4	116618337	116619139
1700021J08Rik	ENSMUSG00000086890	4	116674771	116675617
Gm12997	ENSMUSG00000082249	4	116687732	116688371
Gm13014	ENSMUSG00000084943	4	116796582	116797771
Best4-ps	ENSMUSG00000033872	4	116817862	116821242
Gm13015	ENSMUSG00000070834	4	116821528	116821731
1700012C08Rik	ENSMUSG00000086482	4	116885939	116886387
Gm12843	ENSMUSG00000085749	4	116968422	116970330
Gm12828	ENSMUSG00000086876	4	117118555	117127645
Gm12827	ENSMUSG00000087228	4	117169057	117173207
Gm12826	ENSMUSG00000083446	4	117186428	117186806
Gm12840	ENSMUSG00000086320	4	117372793	117373528
Gm12845	ENSMUSG00000085674	4	117398504	117399434
Gm12844	ENSMUSG00000084260	4	117401323	117401904
Gm12842	ENSMUSG00000083507	4	117497786	117498261
Gm17114	ENSMUSG00000091237	4	117507904	117541163
Gm20520	ENSMUSG00000091331	4	117540261	117541578
Gm12841	ENSMUSG00000085278	4	117556226	117558600
9530034E10Rik	ENSMUSG00000086554	4	117647641	117666577
Gm12858	ENSMUSG00000081921	4	118113618	118113825
Gm12859	ENSMUSG00000080857	4	118163387	118170247
U5	ENSMUSG00000070237	4	116883449	116883564
SNORD38	ENSMUSG00000064542	4	116826698	116826767
AL671866.1	ENSMUSG00000092682	4	116830914	116831038
Snord38a	ENSMUSG00000065680	4	116827119	116827189
SNORD46	ENSMUSG00000064751	4	116827791	116827894
U6	ENSMUSG00000088349	4	116699816	116699914
U6	ENSMUSG00000065154	4	116594989	116595095
Snord55	ENSMUSG00000092680	4	116828375	116828453
U6	ENSMUSG00000088845	4	116577242	116577346
AL671520.1	ENSMUSG00000087807	4	117242739	117242812
U6	ENSMUSG00000065185	4	116346758	116346867
AL683847.1	ENSMUSG00000092707	4	116406203	116406437
U5	ENSMUSG00000064430	4	116862547	116862662
7SK	ENSMUSG00000088902	4	116587832	116588098
SNORA70	ENSMUSG00000088303	4	117836683	117836786
U5	ENSMUSG00000070228	4	116875133	116875248
2610528J11Rik	ENSMUSG00000028536	4	118199604	118202833
Tmem125	ENSMUSG00000050854	4	118213546	118216649
Wdr65	ENSMUSG00000028730	4	118227156	118293382
Ebna1bp2	ENSMUSG00000028729	4	118293404	118300381
Olfr62	ENSMUSG00000043698	4	118338124	118339072
Olfr1342	ENSMUSG00000043383	4	118362067	118363068
Olfr1341	ENSMUSG00000046790	4	118381015	118382952
Olfr1340	ENSMUSG00000070821	4	118398854	118399804
Olfr1339	ENSMUSG00000070820	4	118407136	118408083
Olfr1338	ENSMUSG00000066063	4	118426200	118427141
Olfr1337	ENSMUSG00000061075	4	118454241	118455188
Olfr1335	ENSMUSG00000066061	4	118481402	118482549
Olfr1333	ENSMUSG00000073770	4	118502090	118508878
Olfr1331	ENSMUSG00000073769	4	118537263	118542341
Olfr1330	ENSMUSG00000073768	4	118565690	118566637
Olfr1329	ENSMUSG00000073767	4	118589129	118590070
Olfr1328	ENSMUSG00000073766	4	118606504	118607445
Lao1	ENSMUSG00000024903	4	118634183	118641517
Slc2a1	ENSMUSG00000028645	4	118781316	118809935
Zfp691	ENSMUSG00000045268	4	118842118	118846800
Ermap	ENSMUSG00000028644	4	118848062	118862616
Ccdc23	ENSMUSG00000028643	4	118867911	118873903
AU022252	ENSMUSG00000078584	4	118876175	118905317
4930538K18Rik	ENSMUSG00000028642	4	118877712	118890822
Lepre1	ENSMUSG00000028641	4	118905520	118921580
Cldn19	ENSMUSG00000066058	4	118928019	118935043
Ybx1	ENSMUSG00000028639	4	118950586	118967209
Gm12857	ENSMUSG00000081233	4	118194623	118195214
Gm12853	ENSMUSG00000085292	4	118305452	118308667
Olfr1343-ps1	ENSMUSG00000086521	4	118345214	118346127
Gm12855	ENSMUSG00000081474	4	118463686	118464198
Olfr1332-ps1	ENSMUSG00000083336	4	118526697	118527650
Gm12856	ENSMUSG00000084133	4	118614665	118615957
Gm12863	ENSMUSG00000073765	4	118626879	118627524
Gm12861	ENSMUSG00000085895	4	118643902	118672063
Gm12865	ENSMUSG00000087238	4	118656663	118669803
Gm12864	ENSMUSG00000082143	4	118659619	118660624
Gm12862	ENSMUSG00000087464	4	118672265	118673090
Gm12866	ENSMUSG00000066060	4	118727395	118741716
Gm12867	ENSMUSG00000086683	4	118802897	118803606
Gm12868	ENSMUSG00000085505	4	118806354	118811406
Gm12898	ENSMUSG00000085626	4	118895779	118897420
Gm12927	ENSMUSG00000085203	4	118925127	118929580
SNORA17	ENSMUSG00000089591	4	118652923	118653047
Mir1957	ENSMUSG00000088552	4	118802384	118802449
Ppih	ENSMUSG00000060288	4	118972615	118993151
Ccdc30	ENSMUSG00000028637	4	118995498	119088126
Ldha-ps2	ENSMUSG00000083836	4	119006994	119008050
Ppcs	ENSMUSG00000028636	4	119091135	119095025
Zmynd12	ENSMUSG00000070806	4	119095419	119140049
BX470216.1	ENSMUSG00000092987	4	119078639	119078845
Rimkla	ENSMUSG00000048899	4	119137888	119165233
Gm12954	ENSMUSG00000082009	4	119174470	119175151
Gm12956	ENSMUSG00000082814	4	119182253	119182666
Gm12955	ENSMUSG00000080773	4	119191731	119192687
Gm12957	ENSMUSG00000084379	4	119193595	119193971
U6	ENSMUSG00000065240	4	119200605	119200711
AA415398	ENSMUSG00000087385	4	119202913	119212134
Foxj3	ENSMUSG00000032998	4	119209609	119301724
Gm12959	ENSMUSG00000081678	4	119226261	119226663
Guca2a	ENSMUSG00000023247	4	119310309	119312076
Guca2b	ENSMUSG00000032978	4	119329212	119331559
Hivep3	ENSMUSG00000028634	4	119406389	119810650
Hivep3	ENSMUSG00000078582	4	119406401	119409373
Hivep3	ENSMUSG00000091688	4	119487167	119545940
Edn2	ENSMUSG00000028635	4	119833811	119839965
Foxo6	ENSMUSG00000052135	4	119939684	119959954
Scmh1	ENSMUSG00000000085	4	120077886	120202804
Slfnl1	ENSMUSG00000047518	4	120204836	120209266
Ctps	ENSMUSG00000028633	4	120212473	120242881
Gm8439	ENSMUSG00000091297	4	120261350	120282278
Cited4	ENSMUSG00000070803	4	120339168	120340425
Kcnq4	ENSMUSG00000028631	4	120368743	120421217
Nfyc	ENSMUSG00000032897	4	120430043	120504177
Rims3	ENSMUSG00000032890	4	120527421	120569184
Dem1	ENSMUSG00000028629	4	120593801	120597622
Zfp69	ENSMUSG00000064141	4	120602742	120624304
Smap2	ENSMUSG00000032870	4	120640922	120689852
Col9a2	ENSMUSG00000028626	4	120711990	120727927
Zmpste24	ENSMUSG00000043207	4	120731842	120770846
Tmco2	ENSMUSG00000078577	4	120778256	120781831
Rlf	ENSMUSG00000049878	4	120817978	120887689
Gm12888	ENSMUSG00000073764	4	120988921	120997522
Gm12886	ENSMUSG00000078576	4	121087340	121095704
Gm12887	ENSMUSG00000078575	4	121286876	121294708
4732418A04Rik	ENSMUSG00000084929	4	119963955	119976497
Gm12860	ENSMUSG00000086187	4	120288445	120295287
Gm12871	ENSMUSG00000082200	4	120573828	120574265
Gm12882	ENSMUSG00000081423	4	120787394	120787910
Gm12881	ENSMUSG00000082891	4	120793479	120793901
Gm12879	ENSMUSG00000081305	4	120802723	120803904
Gm12890	ENSMUSG00000080706	4	120899706	120900078
Gm12889	ENSMUSG00000083941	4	121052399	121052639
Gm12885	ENSMUSG00000083901	4	121053200	121053527
Gm12884	ENSMUSG00000081465	4	121054034	121054358
Gm12883	ENSMUSG00000081667	4	121065597	121069162
Gm12880	ENSMUSG00000082821	4	121149415	121152055
Gm12878	ENSMUSG00000083615	4	121314051	121314382
Gm12897	ENSMUSG00000083949	4	121542784	121561691
Gm12893	ENSMUSG00000083867	4	121590014	121590952
SNORA18	ENSMUSG00000088314	4	120748403	120748527
U1	ENSMUSG00000088168	4	120756591	120756754
AL606904.1	ENSMUSG00000077100	4	120510093	120510202
Mir30e	ENSMUSG00000065409	4	120445211	120445302
Mir30c-1	ENSMUSG00000065490	4	120442139	120442227
7SK	ENSMUSG00000064547	4	120807262	120807580
SNORA17	ENSMUSG00000088418	4	121182077	121182208
U6	ENSMUSG00000089381	4	120576065	120576168
Gm12892	ENSMUSG00000083679	4	121756168	121757313
Gm12896	ENSMUSG00000083558	4	121870822	121871047
Gm12894	ENSMUSG00000084406	4	121982891	121983831
Grik3	ENSMUSG00000001985	4	125167944	125391417
Csf3r	ENSMUSG00000028859	4	125701794	125722219
Mrps15	ENSMUSG00000028861	4	125724169	125732776
Oscp1	ENSMUSG00000042616	4	125735809	125769439
Lsm10	ENSMUSG00000050188	4	125773867	125775828
Stk40	ENSMUSG00000042608	4	125781201	125818273
Fam176b	ENSMUSG00000050212	4	125824988	125827119
1700029G01Rik	ENSMUSG00000073758	4	125827846	125840735
Thrap3	ENSMUSG00000043962	4	125841326	125880004
Mtap7d1	ENSMUSG00000028849	4	125909411	125933587
Trappc3	ENSMUSG00000028847	4	125939569	125953127
Col8a2	ENSMUSG00000056174	4	125964037	125991574
Adprhl2	ENSMUSG00000042558	4	125993291	125998947
Tekt2	ENSMUSG00000028845	4	125999365	126002932
Eif2c3	ENSMUSG00000028842	4	126008948	126106800
Gm17553	ENSMUSG00000090490	4	126019033	126023474
Eif2c1	ENSMUSG00000041530	4	126112256	126145827
Eif2c4	ENSMUSG00000042500	4	126166785	126210716
Clspn	ENSMUSG00000042489	4	126234179	126271147
5730409E04Rik	ENSMUSG00000073755	4	126287062	126291615
Psmb2	ENSMUSG00000028837	4	126354874	126386958
Tfap2e	ENSMUSG00000042477	4	126393250	126413484
Ncdn	ENSMUSG00000028833	4	126420994	126430682
AU040320	ENSMUSG00000028830	4	126430788	126547314
Zmym4	ENSMUSG00000042446	4	126539069	126645379
Sfpq	ENSMUSG00000028820	4	126698568	126714257
Zmym1	ENSMUSG00000043872	4	126724338	126738396
Zmym6	ENSMUSG00000042408	4	126754627	126801616
Gm12942	ENSMUSG00000070737	4	126800935	126806888
Dlgap3	ENSMUSG00000042388	4	126846448	126914266
1700041M05Rik	ENSMUSG00000087010	4	124905841	124919296
Ftl2	ENSMUSG00000082062	4	125181532	125182083
2610028E06Rik	ENSMUSG00000085562	4	125565095	125599661
Rpl28-ps3	ENSMUSG00000079942	4	125747071	125747561
Gm12946	ENSMUSG00000086961	4	125823223	125824979
Gm12945	ENSMUSG00000087394	4	126000843	126002481
Gm12929	ENSMUSG00000084099	4	126153546	126153915
Gm12928	ENSMUSG00000082381	4	126153971	126154543
Gm12935	ENSMUSG00000083461	4	126198913	126199331
Gm12934	ENSMUSG00000082888	4	126201574	126201916
Gm12936	ENSMUSG00000081319	4	126261753	126262053
Gm12933	ENSMUSG00000081210	4	126342498	126343369
Gm12937	ENSMUSG00000082498	4	126472717	126473659
Gm12939	ENSMUSG00000081609	4	126660683	126660847
Gm12940	ENSMUSG00000085334	4	126710975	126726642
Gm12941	ENSMUSG00000084088	4	126723627	126723846
Gm12944	ENSMUSG00000084149	4	126733506	126733968
Gm12943	ENSMUSG00000082220	4	126818523	126818732
U6	ENSMUSG00000088982	4	126785710	126785815
Mir692-2a	ENSMUSG00000076035	4	125181993	125182101
AL606976.1	ENSMUSG00000080597	4	126054383	126054475
SNORA17	ENSMUSG00000088984	4	126538224	126538356
AL606908.1	ENSMUSG00000092839	4	126508708	126509002
AL732624.1	ENSMUSG00000092789	4	125903194	125903265
AL606976.2	ENSMUSG00000092672	4	125971133	125971391
SNORA17	ENSMUSG00000077780	4	126495260	126495389
U6	ENSMUSG00000084504	4	125878419	125878521
BC003266	ENSMUSG00000042380	4	126921028	126925053
U6	ENSMUSG00000087987	4	126961975	126962077
Trim62	ENSMUSG00000041000	4	128560824	128588572
Adc	ENSMUSG00000028789	4	128607477	128639686
Ak2	ENSMUSG00000028792	4	128669202	128688773
Rnf19b	ENSMUSG00000028793	4	128735515	128763130
Tmem54	ENSMUSG00000028786	4	128782792	128788870
Hpca	ENSMUSG00000028785	4	128788814	128799280
Fndc5	ENSMUSG00000001334	4	128814243	128821837
S100pbp	ENSMUSG00000040928	4	128825249	128866971
Yars	ENSMUSG00000028811	4	128867004	128896851
C77080	ENSMUSG00000050390	4	128896822	128938648
Sync	ENSMUSG00000001333	4	128964861	128985803
Rbbp4	ENSMUSG00000057236	4	128984344	129012614
Zbtb8os	ENSMUSG00000057572	4	129012939	129031791
Zbtb8a	ENSMUSG00000028807	4	129030872	129055360
Zbtb8b	ENSMUSG00000048485	4	129103009	129118097
Bsdc1	ENSMUSG00000040859	4	129138825	129165742
Tssk3	ENSMUSG00000000411	4	129166258	129168266
1700125D06Rik	ENSMUSG00000078554	4	129168434	129169200
Marcksl1	ENSMUSG00000047945	4	129190825	129193229
Hdac1	ENSMUSG00000028800	4	129193348	129219957
Lck	ENSMUSG00000000409	4	129225588	129250885
Fam167b	ENSMUSG00000050493	4	129254059	129255793
Eif3i	ENSMUSG00000028798	4	129269204	129277892
2510006D16Rik	ENSMUSG00000028797	4	129277912	129301303
Dcdc2b	ENSMUSG00000078552	4	129285773	129291498
Iqcc	ENSMUSG00000040795	4	129292370	129296343
Ccdc28b	ENSMUSG00000028795	4	129296518	129301191
Txlna	ENSMUSG00000053841	4	129303327	129318309
Kpna6	ENSMUSG00000003731	4	129321224	129350011
Tmem39b	ENSMUSG00000053730	4	129353599	129374082
Khdrbs1	ENSMUSG00000028790	4	129380408	129419547
Ptp4a2	ENSMUSG00000028788	4	129488463	129527247
Spocd1	ENSMUSG00000028784	4	129624791	129634359
Bai2	ENSMUSG00000028782	4	129662114	129699877
Col16a1	ENSMUSG00000040690	4	129725084	129776527
Pef1	ENSMUSG00000028779	4	129779802	129805379
Hcrtr1	ENSMUSG00000028778	4	129807461	129816603
Tinagl1	ENSMUSG00000028776	4	129841698	129852366
Gm853	ENSMUSG00000023120	4	129886353	129899645
Serinc2	ENSMUSG00000023232	4	129930739	129956449
Gm10570	ENSMUSG00000073752	4	129985406	129985918
Fabp3	ENSMUSG00000028773	4	129985839	129992707
Zcchc17	ENSMUSG00000028772	4	129992627	130037190
Snrnp40	ENSMUSG00000074088	4	130037379	130067274
Nkain1	ENSMUSG00000078532	4	130125705	130169623
Pum1	ENSMUSG00000028580	4	130219236	130337479
Sdc3	ENSMUSG00000025743	4	130348452	130382234
Laptm5	ENSMUSG00000028581	4	130469040	130492056
Gm12968	ENSMUSG00000085701	4	128523441	128550942
Gm12969	ENSMUSG00000084011	4	128545637	128546640
Gm15904	ENSMUSG00000085961	4	128613249	128617439
1700086P04Rik	ENSMUSG00000085085	4	128727341	128735227
Gm15906	ENSMUSG00000087416	4	128812335	128814154
Gm12976	ENSMUSG00000087575	4	128939209	128942254
Gm12980	ENSMUSG00000082468	4	129057088	129057423
Gm12979	ENSMUSG00000086336	4	129169213	129186990
Gm12965	ENSMUSG00000086797	4	129300855	129301336
Gm12967	ENSMUSG00000080944	4	129438872	129439160
Gm10571	ENSMUSG00000073753	4	129532315	129533954
Gm12966	ENSMUSG00000070729	4	129576337	129577146
E330017L17Rik	ENSMUSG00000086369	4	129583460	129597031
1700003M07Rik	ENSMUSG00000085389	4	129637618	129640901
Gm12963	ENSMUSG00000085517	4	129701500	129725018
Gm12971	ENSMUSG00000087449	4	130314478	130318294
Gm12972	ENSMUSG00000086548	4	130341984	130343770
Gm12970	ENSMUSG00000087451	4	130367532	130368241
Gm17525	ENSMUSG00000091673	4	128986325	128995687
Gm17328	ENSMUSG00000091343	4	130330732	130335161
snoU13	ENSMUSG00000088921	4	128896701	128896788
U1	ENSMUSG00000064613	4	129135595	129135734
SNORA17	ENSMUSG00000077381	4	130413666	130413795
SNORD103	ENSMUSG00000065790	4	130331656	130331738
U1	ENSMUSG00000065768	4	129572817	129572968
Snord85	ENSMUSG00000065196	4	130305549	130305621
AL607123.1	ENSMUSG00000093163	4	128960109	128960190
SNORD103	ENSMUSG00000064484	4	130322246	130322328
4930455G09Rik	ENSMUSG00000085761	4	141573813	141584911
Gm13053	ENSMUSG00000085574	4	141598827	141604493
Padi2	ENSMUSG00000028927	4	140462259	140508501
Sdhb	ENSMUSG00000009863	4	140517118	140535108
Atp13a2	ENSMUSG00000036622	4	140542788	140563245
Mfap2	ENSMUSG00000060572	4	140566333	140571899
Crocc	ENSMUSG00000040860	4	140572552	140616465
Necap2	ENSMUSG00000028923	4	140622427	140634272
Spata21	ENSMUSG00000045004	4	140644248	140668675
D4Ertd22e	ENSMUSG00000040842	4	140668916	140695690
Fbxo42	ENSMUSG00000028920	4	140703828	140759977
6330545A04Rik	ENSMUSG00000073733	4	140769871	140782671
C630004L07Rik	ENSMUSG00000091674	4	140794100	140795368
Arhgef19	ENSMUSG00000028919	4	140795490	140813479
Epha2	ENSMUSG00000006445	4	140857155	140885299
Fam131c	ENSMUSG00000006218	4	140924135	140940090
Clcnka	ENSMUSG00000033770	4	140940525	140954639
Clcnkb	ENSMUSG00000006216	4	140960268	140971929
Hspb7	ENSMUSG00000006221	4	140976694	140981226
Gm694	ENSMUSG00000070637	4	140988587	140992020
Zbtb17	ENSMUSG00000006215	4	141000569	141023845
Spen	ENSMUSG00000040761	4	141023805	141094512
Fblim1	ENSMUSG00000006219	4	141131977	141162011
4930515B02Rik	ENSMUSG00000087045	4	140428608	140433970
Gm13031	ENSMUSG00000087698	4	140503581	140513817
Gm13047	ENSMUSG00000082246	4	140640779	140641593
Gm13055	ENSMUSG00000085774	4	140817677	140821931
Gm13056	ENSMUSG00000085395	4	140834354	140835709
Gm13074	ENSMUSG00000085836	4	140903729	140906768
Gm13076	ENSMUSG00000084238	4	140912803	140913006
Gm13075	ENSMUSG00000086061	4	140954744	140967106
B330016D10Rik	ENSMUSG00000048406	4	141102104	141103807
AI507597	ENSMUSG00000073731	4	141169941	141171519
1810035I16Rik	ENSMUSG00000086818	4	141400236	141402905
Gm13643	ENSMUSG00000085922	4	141441569	141453197
Gm13059	ENSMUSG00000081079	4	141532694	141533258
Gm13037	ENSMUSG00000085424	4	141538907	141542712
Gm10565	ENSMUSG00000073728	4	141639887	141644014
Gm13062	ENSMUSG00000087525	4	141736517	141740054
Gm13052	ENSMUSG00000085816	4	141863680	141902390
Gm13018	ENSMUSG00000082201	4	142147293	142147739
Tmem82	ENSMUSG00000043085	4	141169291	141174548
Slc25a34	ENSMUSG00000040740	4	141174739	141179736
Plekhm2	ENSMUSG00000028917	4	141181649	141220814
Ddi2	ENSMUSG00000078515	4	141233464	141279334
Rsc1a1	ENSMUSG00000040715	4	141239766	141241514
Agmat	ENSMUSG00000040706	4	141302587	141315178
Dnajc16	ENSMUSG00000040697	4	141316104	141346846
Casp9	ENSMUSG00000028914	4	141349527	141371891
Ctrc	ENSMUSG00000062478	4	141370877	141402274
Cela2a	ENSMUSG00000058579	4	141370877	141382075
Efhd2	ENSMUSG00000040659	4	141414057	141430835
Fhad1	ENSMUSG00000051435	4	141446353	141570997
Tmem51	ENSMUSG00000040616	4	141586907	141640219
Kazn	ENSMUSG00000040606	4	141658305	141795316
4921514A10Rik	ENSMUSG00000091088	4	140671575	140674002
U6	ENSMUSG00000064443	4	140474599	140474714
AL670285.1	ENSMUSG00000093180	4	140902079	140902155
Prdm2	ENSMUSG00000057637	4	142697294	142802898
Gm13038	ENSMUSG00000081838	4	142742475	142742933
Gm13039	ENSMUSG00000083826	4	142756506	142757299
Gm13045	ENSMUSG00000082407	4	142992247	142993316
Gm13042	ENSMUSG00000083930	4	143048281	143050441
Lrrc38	ENSMUSG00000028584	4	142939660	142960935
Pramel1	ENSMUSG00000041805	4	142984331	142990063
Pramef8	ENSMUSG00000046862	4	143002329	143010994
Oog4	ENSMUSG00000047799	4	143027067	143040227
Gm13040	ENSMUSG00000070616	4	143101215	143132374
Gm13043	ENSMUSG00000073726	4	143101215	143107736
Gm13057	ENSMUSG00000078514	4	143101246	143148137
BC080695	ENSMUSG00000070618	4	143157378	143163701
Gm13083	ENSMUSG00000066688	4	143204906	143208498
Gm13088	ENSMUSG00000078513	4	143243663	143247149
Gm13089	ENSMUSG00000070617	4	143286403	143292614
Gm13078	ENSMUSG00000046435	4	143309358	143319061
Gm13023	ENSMUSG00000066031	4	143379237	143385488
Gm13084	ENSMUSG00000059218	4	143399148	143405996
Gm13103	ENSMUSG00000029451	4	143436400	143443540
Gm13050	ENSMUSG00000082575	4	142831927	142833271
Anp32b-ps1	ENSMUSG00000081792	4	142979321	142980687
Pdpn	ENSMUSG00000028583	4	142857334	142889467
Gm13046	ENSMUSG00000084059	4	143054177	143054677
Gm13044	ENSMUSG00000080909	4	143077829	143078081
Gm13041	ENSMUSG00000083403	4	143089338	143091998
Gm13058	ENSMUSG00000081523	4	143184965	143187514
Gm13080	ENSMUSG00000044377	4	143201561	143201980
Gm13085	ENSMUSG00000084351	4	143253046	143253690
Gm13082	ENSMUSG00000081227	4	143261027	143261587
Gm13086	ENSMUSG00000081448	4	143274919	143276955
Gm13087	ENSMUSG00000082717	4	143325201	143325456
Gm13081	ENSMUSG00000082030	4	143335690	143341288
Gm13079	ENSMUSG00000082469	4	143363143	143367791
SNORA17	ENSMUSG00000087903	4	142793968	142794099
7SK	ENSMUSG00000088395	4	142930302	142930609
1700012P22Rik	ENSMUSG00000028589	4	144008092	144028675
Pramef6	ENSMUSG00000078512	4	143484140	143490283
Gm13109	ENSMUSG00000078511	4	143538077	143544602
Gm13101	ENSMUSG00000078510	4	143554421	143556853
Pramef17	ENSMUSG00000078509	4	143581022	143584272
Gm13225	ENSMUSG00000078503	4	145100662	145129091
Gm13242	ENSMUSG00000058186	4	145104787	145294344
Gm13212	ENSMUSG00000078502	4	145175069	145215248
Gm13102	ENSMUSG00000073723	4	143696377	143700004
Oog3	ENSMUSG00000050810	4	143747460	143752566
Oog2	ENSMUSG00000066030	4	143780622	143787534
C87977	ENSMUSG00000046262	4	143796678	143803221
Pramel5	ENSMUSG00000036749	4	143860536	143870391
Gm13128	ENSMUSG00000078508	4	143920152	143923368
Gm13119	ENSMUSG00000070619	4	143947845	143954322
Gm13125	ENSMUSG00000073721	4	143962663	143967836
Pramef12	ENSMUSG00000028591	4	143981577	143998367
Tnfrsf8	ENSMUSG00000028602	4	144857040	144905067
Gm9944	ENSMUSG00000054345	4	144041123	144043544
Aadacl3	ENSMUSG00000078507	4	144043674	144053659
9430007A20Rik	ENSMUSG00000028593	4	144109725	144119256
Gm13124	ENSMUSG00000078506	4	144144903	144155037
Gm13177	ENSMUSG00000070609	4	144203610	144213301
Gm436	ENSMUSG00000078505	4	144259840	144276271
Gm13178	ENSMUSG00000041735	4	144293094	144311307
Gm438	ENSMUSG00000078504	4	144367107	144376486
Dhrs3	ENSMUSG00000066026	4	144482730	144518112
Vps13d	ENSMUSG00000073719	4	144562526	144564586
Vps13d	ENSMUSG00000020220	4	144562529	144784898
Tnfrsf1b	ENSMUSG00000028599	4	144803366	144836773
Pramel4	ENSMUSG00000073724	4	143649029	143659230
Gm13100	ENSMUSG00000083749	4	143503760	143506345
Gm13106	ENSMUSG00000084123	4	143518437	143520639
Gm13108	ENSMUSG00000083456	4	143623534	143625513
Gm13104	ENSMUSG00000082075	4	143630936	143632381
Gm13105	ENSMUSG00000083360	4	143721751	143723784
Gm13123	ENSMUSG00000083708	4	143837680	143838171
Gm13120	ENSMUSG00000082221	4	143886595	143888040
Gm13130	ENSMUSG00000080943	4	143892864	143894844
Gm13122	ENSMUSG00000084312	4	143935500	143935952
D530049N12Rik	ENSMUSG00000028590	4	143994771	143996204
Gm13118	ENSMUSG00000082835	4	144088303	144088851
Gm13121	ENSMUSG00000083390	4	144116314	144116945
Gm13126	ENSMUSG00000082418	4	144135409	144138471
Gm13127	ENSMUSG00000070610	4	144177147	144178535
Prdx2-rs3	ENSMUSG00000083998	4	144381740	144382563
Gm13024	ENSMUSG00000082758	4	144980846	144981563
Gm13224	ENSMUSG00000084272	4	144994209	144994302
Gm13227	ENSMUSG00000085101	4	145000148	145039659
Gm13230	ENSMUSG00000082082	4	145036643	145040791
Gm13223	ENSMUSG00000083081	4	145045536	145046282
Smarca5-ps	ENSMUSG00000052912	4	145054107	145057323
Gm13229	ENSMUSG00000087076	4	145059612	145059953
Gm13228	ENSMUSG00000082352	4	145164431	145165064
Gm13226	ENSMUSG00000083454	4	145166792	145167195
Gm13222	ENSMUSG00000080732	4	145168939	145169076
Gm17609	ENSMUSG00000090398	4	145191866	145301871
U1	ENSMUSG00000077327	4	144355530	144355695
Gm13234	ENSMUSG00000083562	4	145222407	145223153
Gm13231	ENSMUSG00000081885	4	145231260	145234302
Gm13249	ENSMUSG00000081983	4	145236674	145237018
Gm13239	ENSMUSG00000082615	4	145279745	145280381
Gm13232	ENSMUSG00000084279	4	145319484	145320115
Gm13244	ENSMUSG00000082334	4	145335649	145337304
Gm13236	ENSMUSG00000087513	4	145352832	145354861
Gm13243	ENSMUSG00000081192	4	145364622	145365186
Gm13235	ENSMUSG00000078500	4	145458697	145489878
1700029I01Rik	ENSMUSG00000084350	4	145415140	145419845
Gm13238	ENSMUSG00000082999	4	145427122	145427901
Gm13246	ENSMUSG00000083235	4	145434307	145434621
AL929465.1	ENSMUSG00000080584	4	145454975	145455095
Gm17452	ENSMUSG00000092143	4	146120857	146399068
Gm13248	ENSMUSG00000063245	4	145539879	145587078
Gm13247	ENSMUSG00000056300	4	145658647	145696012
Gm13251	ENSMUSG00000070605	4	145727747	145749016
Rex2	ENSMUSG00000078499	4	145881315	145887868
Gm13051	ENSMUSG00000066009	4	146064699	146094022
Zfp600	ENSMUSG00000066007	4	146124225	146166156
Gm13240	ENSMUSG00000081710	4	145593263	145593827
Gm13233	ENSMUSG00000083038	4	145615727	145617410
Gm13237	ENSMUSG00000066002	4	145632857	145633949
1700095A21Rik	ENSMUSG00000086046	4	145651166	145679000
Gm13245	ENSMUSG00000081998	4	145717113	145717372
Gm13241	ENSMUSG00000073716	4	145721928	145722710
Gm4169	ENSMUSG00000090683	4	145914740	145915894
Gm13036	ENSMUSG00000081595	4	146026177	146026924
Gm13034	ENSMUSG00000082195	4	146034925	146038329
Gm13035	ENSMUSG00000083733	4	146040658	146040999
Gm13165	ENSMUSG00000086654	4	146134923	146173133
Gm17565	ENSMUSG00000090554	4	145686275	145688945
Rab28	ENSMUSG00000029128	5	42016215	42099394
Nkx3-2	ENSMUSG00000049691	5	42152404	42155735
Bod1l	ENSMUSG00000061755	5	42178781	42235407
Gm16223	ENSMUSG00000067285	5	42459199	42608037
Cpeb2	ENSMUSG00000039782	5	43624702	43680963
Gm7854	ENSMUSG00000085720	5	43626241	43626591
Amtn	ENSMUSG00000029282	5	88805133	88814941
Ambn	ENSMUSG00000029288	5	88885036	88897552
Enam	ENSMUSG00000029286	5	88917007	88935074
Igj	ENSMUSG00000067149	5	88949537	88956916
Utp3	ENSMUSG00000070697	5	88983508	88985108
Rufy3	ENSMUSG00000029291	5	88994065	89080415
Grsf1	ENSMUSG00000044221	5	89088473	89105196
Mob1b	ENSMUSG00000006262	5	89149880	89191083
Dck	ENSMUSG00000029366	5	89194021	89212306
Slc4a4	ENSMUSG00000060961	5	89315843	89668678
Gc	ENSMUSG00000035540	5	89846549	89886790
Npffr2	ENSMUSG00000035528	5	89956454	90012765
Adamts3	ENSMUSG00000043635	5	90102866	90312359
Cox18	ENSMUSG00000035505	5	90643749	90653026
Ankrd17	ENSMUSG00000055204	5	90656215	90795211
Mkrn1-ps1	ENSMUSG00000082389	5	89267034	89268427
Eif5al3-ps	ENSMUSG00000043618	5	90561254	90561700
Gm15682	ENSMUSG00000082438	5	89168272	89168754
SNORA17	ENSMUSG00000077175	5	90257896	90258024
AC117578.1	ENSMUSG00000080523	5	90762598	90762651
7SK	ENSMUSG00000084500	5	90110941	90111264
Brdt	ENSMUSG00000029279	5	107760178	107816077
Ephx4	ENSMUSG00000033805	5	107831755	107859054
Lpcat2b	ENSMUSG00000033794	5	107860568	107864058
Btbd8	ENSMUSG00000070632	5	107867016	107920647
A830010M20Rik	ENSMUSG00000044060	5	107924917	108009615
1700028K03Rik	ENSMUSG00000089798	5	107937963	107980568
Glmn	ENSMUSG00000029276	5	107977986	108026907
Rpap2	ENSMUSG00000033773	5	108026392	108090857
Gfi1	ENSMUSG00000029275	5	108145674	108155056
Evi5	ENSMUSG00000011831	5	108173814	108304126
1700013N18Rik	ENSMUSG00000063447	5	108259272	108260361
Rpl5	ENSMUSG00000058558	5	108329521	108338024
Fam69a	ENSMUSG00000029270	5	108337072	108416104
Mtf2	ENSMUSG00000029267	5	108494693	108538023
Tmed5	ENSMUSG00000063406	5	108535385	108561639
Ccdc18	ENSMUSG00000056531	5	108561933	108661966
Dr1	ENSMUSG00000029265	5	108697916	108709545
Pigg	ENSMUSG00000029263	5	108741628	108778374
Gm10419	ENSMUSG00000072769	5	108798877	108807258
Pde6b	ENSMUSG00000029491	5	108817410	108861416
Atp5k	ENSMUSG00000050856	5	108862263	108863467
Mfsd7a	ENSMUSG00000029490	5	108870073	108877910
Pcgf3	ENSMUSG00000033623	5	108890251	108935995
Cplx1	ENSMUSG00000033615	5	108947573	108979043
Gak	ENSMUSG00000062234	5	108998430	109058758
Tmem175	ENSMUSG00000013495	5	109058789	109076789
Dgkq	ENSMUSG00000004815	5	109075712	109098691
Idua	ENSMUSG00000033540	5	109089350	109113576
Slc26a1	ENSMUSG00000046959	5	109098897	109104588
Fgfrl1	ENSMUSG00000008090	5	109123248	109135969
Rnf212	ENSMUSG00000055385	5	109158481	109178467
Tmed11	ENSMUSG00000004821	5	109206254	109224382
Vmn2r8	ENSMUSG00000090961	5	109226212	109237773
Vmn2r9	ENSMUSG00000091624	5	109271966	109281529
Vmn2r10	ENSMUSG00000067010	5	109422431	109435490
Vmn2r11	ENSMUSG00000091450	5	109475892	109488471
Vmn2r12	ENSMUSG00000090688	5	109514868	109526883
Vmn2r13	ENSMUSG00000091635	5	109585087	109621126
Vmn2r14	ENSMUSG00000091059	5	109644521	109653641
Vmn2r15	ENSMUSG00000091375	5	109715288	109726575
Gm17717	ENSMUSG00000091666	5	108088116	108117034
Gm8152	ENSMUSG00000081798	5	107810400	107811036
Gm17202	ENSMUSG00000090558	5	107833842	107860929
Gm9727	ENSMUSG00000089628	5	107907545	107908099
A930041C12Rik	ENSMUSG00000085900	5	108059269	108062869
A430072P03Rik	ENSMUSG00000090030	5	108154177	108157821
Gm16007	ENSMUSG00000083609	5	108273409	108273694
Gm9850	ENSMUSG00000084855	5	108431279	108431505
Gm10086	ENSMUSG00000060730	5	108946182	108946589
Gm18594	ENSMUSG00000093756	5	109250740	109252142
RP24-465G18.2	ENSMUSG00000093479	5	109278800	109378274
Vmn2r-ps21	ENSMUSG00000093510	5	109301674	109321399
Gm18595	ENSMUSG00000093725	5	109401816	109404914
Gm5871	ENSMUSG00000093545	5	109445217	109445934
Gm8473	ENSMUSG00000093543	5	109665563	109667447
SNORA66	ENSMUSG00000077222	5	108334196	108334327
SNORA66	ENSMUSG00000077426	5	108336364	108336495
n-R5s173	ENSMUSG00000064554	5	107830338	107830456
Snord21	ENSMUSG00000064453	5	108333574	108333667
Vmn2r16	ENSMUSG00000092080	5	109759400	109793500
Vmn2r17	ENSMUSG00000091879	5	109849032	109882406
Gm7171	ENSMUSG00000093663	5	109825349	109831111
Crlf2	ENSMUSG00000033467	5	109983730	109988012
Gm8488	ENSMUSG00000093688	5	109956479	109958489
5430403G16Rik	ENSMUSG00000072763	5	110103564	110120060
4930522L14Rik	ENSMUSG00000072762	5	110165009	110180905
Gm15446	ENSMUSG00000090015	5	110352419	110372955
Zfp932	ENSMUSG00000066613	5	110425540	110439430
Gm17655	ENSMUSG00000090963	5	110475251	110475505
Plcxd1	ENSMUSG00000064247	5	110528988	110534972
Gtpbp6	ENSMUSG00000033434	5	110532994	110537216
Zfp605	ENSMUSG00000023284	5	110539111	110560756
Chfr	ENSMUSG00000014668	5	110564859	110600991
Golga3	ENSMUSG00000029502	5	110605720	110655489
Ankle2	ENSMUSG00000029501	5	110660060	110685666
Pgam5	ENSMUSG00000029500	5	110688149	110698932
Pxmp2	ENSMUSG00000029499	5	110703301	110715205
Pole	ENSMUSG00000007080	5	110715325	110766493
P2rx2	ENSMUSG00000029503	5	110768831	110772168
Gm1679	ENSMUSG00000072754	5	110783115	110785106
Fbrsl1	ENSMUSG00000043323	5	110790773	110877522
1010001B22Rik	ENSMUSG00000091434	5	110424530	110425417
Gm16739	ENSMUSG00000085131	5	110351668	110352500
Gm8508	ENSMUSG00000049477	5	110186541	110186950
Gm15484	ENSMUSG00000081865	5	110547041	110547868
Gm15787	ENSMUSG00000086247	5	110583419	110605523
Gm15788	ENSMUSG00000087439	5	110691180	110706286
Gm15791	ENSMUSG00000081256	5	110757223	110757541
Gm15792	ENSMUSG00000085606	5	110760225	110762222
Gm16728	ENSMUSG00000087494	5	110688182	110698866
SNORA70	ENSMUSG00000087722	5	110757051	110757202
Gm17724	ENSMUSG00000090661	5	110814854	110817092
A630023P12Rik	ENSMUSG00000048215	5	110943942	110954999
Galnt9	ENSMUSG00000033316	5	110973364	111050401
Noc4l	ENSMUSG00000033294	5	111077437	111082436
Ddx51	ENSMUSG00000029504	5	111082470	111089515
Ep400	ENSMUSG00000029505	5	111093392	111199736
U6	ENSMUSG00000065775	5	111106143	111106249
SNORA49	ENSMUSG00000077254	5	111121068	111121200
Pus1	ENSMUSG00000029507	5	111202686	111209678
Ulk1	ENSMUSG00000029512	5	111213507	111239116
Gm15559	ENSMUSG00000086401	5	111199968	111208279
Gm17598	ENSMUSG00000091066	5	111208901	111210146
U6	ENSMUSG00000065071	5	111186104	111186210
Hscb	ENSMUSG00000043510	5	111258089	111268796
Chek2	ENSMUSG00000029521	5	111269036	111303152
Ttc28	ENSMUSG00000033209	5	111308822	111718800
Gm15989	ENSMUSG00000081104	5	111334263	111334760
Gm15988	ENSMUSG00000083771	5	111437499	111437865
Mir701	ENSMUSG00000076163	5	111433163	111433271
Pitpnb	ENSMUSG00000050017	5	111759783	111817379
Mn1	ENSMUSG00000070576	5	111846382	111886053
C130026L21Rik	ENSMUSG00000052848	5	112010442	112016965
E130006D01Rik	ENSMUSG00000085271	5	112163304	112190745
Gm16019	ENSMUSG00000085919	5	112171869	112177196
Miat	ENSMUSG00000086878	5	112642248	112657968
Aym1	ENSMUSG00000053873	5	113786314	113786841
Wscd2	ENSMUSG00000063430	5	113919467	114039679
Cmklr1	ENSMUSG00000042190	5	114062363	114100435
1700069L16Rik	ENSMUSG00000042184	5	114142431	114174781
Ficd	ENSMUSG00000053334	5	114185791	114190609
Sart3	ENSMUSG00000018974	5	114192455	114221658
Gm3511	ENSMUSG00000069196	5	114217108	114217421
Iscu	ENSMUSG00000025825	5	114222757	114228297
Tmem119	ENSMUSG00000054675	5	114243738	114250525
Selplg	ENSMUSG00000048163	5	114267807	114280510
Coro1c	ENSMUSG00000004530	5	114292445	114358767
Ssh1	ENSMUSG00000042121	5	114387103	114443903
Dao	ENSMUSG00000042096	5	114453712	114475458
Svop	ENSMUSG00000042078	5	114476919	114541579
Usp30	ENSMUSG00000029592	5	114550342	114573515
Alkbh2	ENSMUSG00000044339	5	114573935	114578227
Ung	ENSMUSG00000029591	5	114580395	114589332
Acacb	ENSMUSG00000042010	5	114596544	114700770
Foxn4	ENSMUSG00000042002	5	114704173	114723816
Myo1h	ENSMUSG00000066952	5	114764950	114814585
Kctd10	ENSMUSG00000001098	5	114813576	114830524
Ube3b	ENSMUSG00000029577	5	114830637	114871177
Mmab	ENSMUSG00000029575	5	114881043	114894068
Mvk	ENSMUSG00000041939	5	114894278	114910600
BC057022	ENSMUSG00000041930	5	115018025	115063229
Trpv4	ENSMUSG00000014158	5	115072161	115108430
Gltp	ENSMUSG00000011884	5	115119412	115140993
Tchp	ENSMUSG00000002486	5	115157769	115172336
Git2	ENSMUSG00000041890	5	115177416	115225526
Ankrd13a	ENSMUSG00000041870	5	115224686	115256209
1500011B03Rik	ENSMUSG00000072694	5	115258205	115263985
Gm20499	ENSMUSG00000092252	5	115259045	115273469
1500011B03Rik	ENSMUSG00000092279	5	115262802	115263954
2610524H06Rik	ENSMUSG00000092486	5	115271944	115273477
Gm13821	ENSMUSG00000078186	5	115292358	115292871
4930519G04Rik	ENSMUSG00000029564	5	115303673	115333668
Gm9936	ENSMUSG00000054123	5	115305767	115308691
Oasl2	ENSMUSG00000029561	5	115346943	115362243
Oasl1	ENSMUSG00000041827	5	115373249	115387924
2210016L21Rik	ENSMUSG00000029559	5	115392167	115399792
Hnf1a	ENSMUSG00000029556	5	115398370	115421076
Sppl3	ENSMUSG00000029550	5	115461146	115548799
Gm10401	ENSMUSG00000072693	5	115547698	115548304
Acads	ENSMUSG00000029545	5	115560308	115569355
Unc119b	ENSMUSG00000046562	5	115572559	115584984
Mlec	ENSMUSG00000048578	5	115592990	115608188
Cabp1	ENSMUSG00000029544	5	115618698	115644390
Pop5	ENSMUSG00000060152	5	115685845	115695360
Rnf10	ENSMUSG00000041740	5	115691421	115722907
Coq5	ENSMUSG00000041733	5	115729675	115746981
Dynll1	ENSMUSG00000009013	5	115747119	115751008
Srsf9	ENSMUSG00000029538	5	115777186	115783089
Gatc	ENSMUSG00000029536	5	115783251	115791187
Wscd2	ENSMUSG00000085571	5	113919772	113919960
Gm15736	ENSMUSG00000085713	5	114094972	114095691
Gm17122	ENSMUSG00000090458	5	114292610	114293125
Gm16108	ENSMUSG00000089734	5	114515470	114539475
Gm13784	ENSMUSG00000084243	5	114687185	114687934
Gm13789	ENSMUSG00000085590	5	114813424	114815366
Gm13790	ENSMUSG00000086302	5	115001298	115004025
4930515G01Rik	ENSMUSG00000092183	5	115223746	115224992
Gm13820	ENSMUSG00000078187	5	115266974	115267111
Gm13819	ENSMUSG00000082052	5	115278582	115279224
Gm13823	ENSMUSG00000080707	5	115317690	115318034
Gm13822	ENSMUSG00000087477	5	115367327	115373286
Gm13824	ENSMUSG00000086054	5	115418793	115448055
Gm13825	ENSMUSG00000086140	5	115418832	115421409
Gm13827	ENSMUSG00000086167	5	115503430	115503855
Gm13826	ENSMUSG00000072692	5	115552931	115560277
Gm13828	ENSMUSG00000083182	5	115648352	115648714
Gm13831	ENSMUSG00000083875	5	115713102	115713403
Gm13829	ENSMUSG00000082610	5	115741772	115741909
Gm13830	ENSMUSG00000086368	5	115751129	115769217
U6	ENSMUSG00000065320	5	114378733	114378813
Triap1	ENSMUSG00000029535	5	115791234	115793578
Cox6a1	ENSMUSG00000041697	5	115795651	115798990
Scarb1	ENSMUSG00000037936	5	125757457	125821464
Ubc	ENSMUSG00000008348	5	125866335	125870572
Gm10382	ENSMUSG00000072612	5	125869692	125870924
Dhx37	ENSMUSG00000029480	5	125894230	125914491
Bri3bp	ENSMUSG00000037905	5	125921938	125941242
Aacs	ENSMUSG00000029482	5	125956184	125997782
Tmem132b	ENSMUSG00000070498	5	126102858	126179143
Tmem132b	ENSMUSG00000029483	5	126259004	126268438
Gm4868	ENSMUSG00000091970	5	126328322	126329110
U6	ENSMUSG00000070220	5	126869918	126870024
U6	ENSMUSG00000084551	5	126994245	126994351
Tmem132c	ENSMUSG00000034324	5	127722178	128046163
1700085B03Rik	ENSMUSG00000087104	5	127737228	127762004
Slc15a4	ENSMUSG00000029416	5	128076034	128113267
Glt1d1	ENSMUSG00000049971	5	128112632	128189124
Tmem132d	ENSMUSG00000034310	5	128263861	128938937
Gm17132	ENSMUSG00000061331	5	128357703	128358860
Gm17131	ENSMUSG00000085328	5	128358901	128362746
Fzd10	ENSMUSG00000081683	5	129106719	129109968
Piwil1	ENSMUSG00000029423	5	129242121	129261349
Rimbp2	ENSMUSG00000029420	5	129266276	129459237
Stx2	ENSMUSG00000029428	5	129490432	129514449
Ran	ENSMUSG00000029430	5	129525944	129530198
Gpr133	ENSMUSG00000044017	5	129602625	129710474
5930412G12Rik	ENSMUSG00000072591	5	129084981	129106568
Fzd10	ENSMUSG00000089856	5	129106806	129109236
Rps16-ps2	ENSMUSG00000060419	5	129633952	129634446
AC166933.1	ENSMUSG00000077816	5	128941118	128941211
Auts2	ENSMUSG00000029673	5	131913205	133019214
Gatsl2	ENSMUSG00000015944	5	134575581	134620213
Wbscr16	ENSMUSG00000061979	5	134623924	134652644
Gtf2ird2	ENSMUSG00000015942	5	134659889	134700225
Ncf1	ENSMUSG00000015950	5	134695923	134705495
Gtf2i	ENSMUSG00000060261	5	134713704	134790630
Gm10051	ENSMUSG00000058905	5	133950950	133951446
Gm15627	ENSMUSG00000087344	5	134574282	134575078
AC158379.1	ENSMUSG00000092991	5	134677736	134678021
7SK	ENSMUSG00000088123	5	133277548	133277826
7SK	ENSMUSG00000084729	5	134680339	134680626
Mir3965	ENSMUSG00000093311	5	134802324	134802392
AC093346.1	ENSMUSG00000092941	5	134769857	134770152
Gtf2ird1	ENSMUSG00000023079	5	134833539	134932581
Fkbp6	ENSMUSG00000040013	5	135767574	135825895
Trim50	ENSMUSG00000053388	5	135829165	135843875
Nsun5	ENSMUSG00000000916	5	135845823	135852675
Pom121	ENSMUSG00000053293	5	135852011	135870416
Hip1	ENSMUSG00000039959	5	135882393	136020992
Ccl26	ENSMUSG00000070464	5	136036318	136039439
Ccl24	ENSMUSG00000004814	5	136045807	136048913
Rhbdd2	ENSMUSG00000039917	5	136108488	136122318
Por	ENSMUSG00000005514	5	136145903	136211196
Tmem120a	ENSMUSG00000039886	5	136211355	136220141
Styxl1	ENSMUSG00000019178	5	136223090	136254255
Mdh2	ENSMUSG00000019179	5	136254350	136266268
Srrm3	ENSMUSG00000039860	5	136282760	136350642
Hspb1	ENSMUSG00000004951	5	136363789	136365433
Ywhag	ENSMUSG00000051391	5	136384279	136410486
Srcrb4d	ENSMUSG00000029699	5	136436081	136450401
Zp3	ENSMUSG00000004948	5	136455969	136464494
Dtx2	ENSMUSG00000004947	5	136470670	136508742
Upk3b	ENSMUSG00000042985	5	136514366	136521173
2310043J07Rik	ENSMUSG00000006143	5	136530362	136540196
Rasa4	ENSMUSG00000004952	5	136559786	136587730
Polr2j	ENSMUSG00000039771	5	136592501	136598817
Lrwd1	ENSMUSG00000029703	5	136598642	136611944
Alkbh4	ENSMUSG00000039754	5	136612016	136617485
Orai2	ENSMUSG00000039747	5	136623334	136646526
Prkrip1	ENSMUSG00000039737	5	136653997	136674833
Sh2b2	ENSMUSG00000005057	5	136694019	136720773
Cux1	ENSMUSG00000029705	5	136724005	137043360
4731417B20Rik	ENSMUSG00000046548	5	137089572	137091198
Myl10	ENSMUSG00000005474	5	137169016	137176964
Emid2	ENSMUSG00000004415	5	137217629	137359079
Rabl5	ENSMUSG00000007987	5	137384020	137389114
Fis1	ENSMUSG00000019054	5	137429145	137442104
Cldn15	ENSMUSG00000001739	5	137442486	137451728
Znhit1	ENSMUSG00000059518	5	137458034	137463891
Plod3	ENSMUSG00000004846	5	137462889	137472518
Vgf	ENSMUSG00000037428	5	137506165	137509221
Ap1s1	ENSMUSG00000004849	5	137510863	137522005
Serpine1	ENSMUSG00000037411	5	137537374	137548142
Trim56	ENSMUSG00000043279	5	137581514	137592079
Muc3	ENSMUSG00000037390	5	137610794	137625994
Gm3054	ENSMUSG00000079174	5	137632985	137634856
Ache	ENSMUSG00000023328	5	137728747	137735694
Ufsp1	ENSMUSG00000051502	5	137735897	137736892
Srrt	ENSMUSG00000037364	5	137736932	137748902
Trip6	ENSMUSG00000023348	5	137751127	137755632
Slc12a9	ENSMUSG00000037344	5	137755786	137774825
Gm7284	ENSMUSG00000087244	5	137473256	137475164
Gm15607	ENSMUSG00000082001	5	136113009	136113366
Gm16061	ENSMUSG00000080972	5	136174033	136174889
4930521C21Rik	ENSMUSG00000085026	5	136318927	136320816
Gm15701	ENSMUSG00000086656	5	136578474	136580306
Gm16599	ENSMUSG00000086220	5	136750866	136893764
A430110C17Rik	ENSMUSG00000093578	5	136821754	136826101
Gm20485	ENSMUSG00000092402	5	137339507	137345592
4933404O12Rik	ENSMUSG00000085062	5	137395016	137412982
Mir702	ENSMUSG00000076240	5	137467303	137467411
AC084162.1	ENSMUSG00000092803	5	136313165	136313242
U12	ENSMUSG00000088188	5	136572130	136572301
U6	ENSMUSG00000064651	5	136351527	136351633
Ephb4	ENSMUSG00000029710	5	137791337	137819897
Zan	ENSMUSG00000079173	5	137819865	137918292
Epo	ENSMUSG00000029711	5	137923487	137974470
Pop7	ENSMUSG00000029715	5	137942666	137943746
Gigyf1	ENSMUSG00000029714	5	137960108	137969162
Gnb2	ENSMUSG00000029713	5	137969355	137974738
Actl6b	ENSMUSG00000029712	5	137994745	138010810
Tfr2	ENSMUSG00000029716	5	138011079	138028709
Mospd3	ENSMUSG00000037221	5	138037873	138042286
Pcolce	ENSMUSG00000029718	5	138046331	138055012
Fbxo24	ENSMUSG00000089984	5	138053731	138070230
Lrch4	ENSMUSG00000093445	5	138070349	138082327
Lrch4	ENSMUSG00000029720	5	138070403	138084127
Gm17112	ENSMUSG00000090873	5	137973651	137981946
Gm16089	ENSMUSG00000081228	5	138056855	138057190
Sap25	ENSMUSG00000079165	5	138082562	138084130
Irs3	ENSMUSG00000047182	5	138084260	138086942
6430598A04Rik	ENSMUSG00000045348	5	138172111	138182835
Tsc22d4	ENSMUSG00000029723	5	138186958	138209678
Ppp1r35	ENSMUSG00000029725	5	138220077	138221338
Mepce	ENSMUSG00000029726	5	138223134	138227943
Zcwpw1	ENSMUSG00000037108	5	138229026	138263849
Pilra	ENSMUSG00000046245	5	138263180	138277506
Pilrb1	ENSMUSG00000066684	5	138293375	138299277
Pilrb2	ENSMUSG00000066682	5	138307057	138312986
Cyp3a13	ENSMUSG00000029727	5	138334160	138362847
Gjc3	ENSMUSG00000056966	5	138395037	138404187
Azgp1	ENSMUSG00000037053	5	138422749	138431461
Gm4963	ENSMUSG00000063739	5	138434275	138434652
Smok3a	ENSMUSG00000075599	5	138462504	138475893
Smok3b	ENSMUSG00000075598	5	138478452	138491863
Zkscan1	ENSMUSG00000029729	5	138526312	138549050
Zscan21	ENSMUSG00000037017	5	138558131	138575493
Zfp113	ENSMUSG00000037007	5	138580930	138596972
Cops6	ENSMUSG00000019494	5	138602299	138605874
Mcm7	ENSMUSG00000029730	5	138605811	138613650
Ap4m1	ENSMUSG00000019518	5	138613230	138619936
Taf6	ENSMUSG00000036980	5	138619845	138628679
Cnpy4	ENSMUSG00000036968	5	138628713	138635146
Mblac1	ENSMUSG00000049285	5	138635542	138636628
Gm454	ENSMUSG00000089783	5	138644837	138648536
BC055004	ENSMUSG00000047592	5	138667126	138694591
0910001L09Rik	ENSMUSG00000050552	5	138696836	138700626
BC037034	ENSMUSG00000036948	5	138700884	138705280
BC037034	ENSMUSG00000091964	5	138700886	138705274
Gal3st4	ENSMUSG00000075593	5	138706149	138714068
Gpc2	ENSMUSG00000029510	5	138706180	138721233
Stag3	ENSMUSG00000036928	5	138721468	138753621
Gm10874	ENSMUSG00000075591	5	138804947	138829515
Zfp157	ENSMUSG00000036898	5	138882696	138901922
1700123K08Rik	ENSMUSG00000029526	5	139003068	139005922
Zfp68	ENSMUSG00000058291	5	139045844	139060989
A430033K04Rik	ENSMUSG00000056014	5	139064087	139090052
Fam20c	ENSMUSG00000025854	5	139230468	139286031
Pdgfa	ENSMUSG00000025856	5	139451968	139473324
Gm17247	ENSMUSG00000090903	5	139461462	139461950
6330403L08Rik	ENSMUSG00000075585	5	139471010	139476530
Prkar1b	ENSMUSG00000025855	5	139493260	139625955
Heatr2	ENSMUSG00000025857	5	139626177	139662464
Sun1	ENSMUSG00000036817	5	139676591	139725794
Get4	ENSMUSG00000025858	5	139728278	139746005
Adap1	ENSMUSG00000056413	5	139747830	139801576
Cox19	ENSMUSG00000045438	5	139812143	139821187
Cyp2w1	ENSMUSG00000029541	5	139828571	139832987
3110082I17Rik	ENSMUSG00000053553	5	139835693	139936456
Gpr146	ENSMUSG00000044197	5	139853696	139872369
D830046C22Rik	ENSMUSG00000021206	5	139854174	139855213
C130050O18Rik	ENSMUSG00000044092	5	139881234	139891577
Gpr30	ENSMUSG00000053647	5	139899105	139903754
Zfand2a	ENSMUSG00000053581	5	139947165	139960503
Uncx	ENSMUSG00000029546	5	140019448	140079180
Gm15753	ENSMUSG00000082088	5	138161582	138162968
Gm15502	ENSMUSG00000083813	5	138337980	138338187
Smok3c	ENSMUSG00000079156	5	138494423	138507767
6330418K02Rik	ENSMUSG00000085227	5	138705271	138707889
Got2-ps1	ENSMUSG00000080935	5	138805488	138806780
Gm5564	ENSMUSG00000046440	5	138946066	138947174
Gm15497	ENSMUSG00000081142	5	139051967	139052517
Gm15672	ENSMUSG00000086873	5	139623530	139626647
Mir93	ENSMUSG00000065527	5	138606751	138606838
Mir339	ENSMUSG00000065593	5	139845604	139845699
U6	ENSMUSG00000065300	5	139919553	139919659
U6	ENSMUSG00000064892	5	138819819	138819925
AC125115.1	ENSMUSG00000092916	5	139047927	139048009
Mir106b	ENSMUSG00000065514	5	138606965	138607046
Mir25	ENSMUSG00000065394	5	138606549	138606632
U4	ENSMUSG00000084469	5	138660965	138661044
Micall2	ENSMUSG00000036718	5	140182647	140212290
Ints1	ENSMUSG00000029547	5	140227236	140251632
Mafk	ENSMUSG00000018143	5	140267467	140278607
Tmem184a	ENSMUSG00000036687	5	140278439	140295871
Psmg3	ENSMUSG00000029551	5	140299548	140302797
Elfn1	ENSMUSG00000048988	5	140383897	140450665
Mad1l1	ENSMUSG00000029554	5	140484643	140797506
Gm16122	ENSMUSG00000085673	5	140550059	140561466
Gm16121	ENSMUSG00000087606	5	140577153	140583545
Gm16120	ENSMUSG00000087248	5	140683339	140686705
7SK	ENSMUSG00000064694	5	140320884	140321204
Lmtk2	ENSMUSG00000038970	5	144861305	144949073
Bhlha15	ENSMUSG00000052271	5	144951155	144955310
Tecpr1	ENSMUSG00000066621	5	144955311	144984484
Bri3	ENSMUSG00000047843	5	145005306	145207626
Baiap2l1	ENSMUSG00000038859	5	145025395	145118981
Nptx2	ENSMUSG00000059991	5	145306756	145318347
Tmem130	ENSMUSG00000043388	5	145496784	145522518
Trrap	ENSMUSG00000045482	5	145528961	145620647
Smurf1	ENSMUSG00000038780	5	145637364	145726716
Kpna7	ENSMUSG00000038770	5	145744388	145844899
Gm4871	ENSMUSG00000061707	5	145790469	145793633
1700018F24Rik	ENSMUSG00000029620	5	145803859	145806547
Arpc1a	ENSMUSG00000029621	5	145844699	145869630
Arpc1b	ENSMUSG00000029622	5	145875084	145891574
Pdap1	ENSMUSG00000029623	5	145889638	145901107
Bud31	ENSMUSG00000038722	5	145901231	145908947
Ptcd1	ENSMUSG00000029624	5	145908383	145927977
Cpsf4	ENSMUSG00000029625	5	145928082	145942910
Atp5j2	ENSMUSG00000038690	5	145944567	145952931
Zkscan14	ENSMUSG00000029627	5	145955815	145962751
Zkscan5	ENSMUSG00000055991	5	145965431	145982619
Zfp655	ENSMUSG00000007812	5	145992592	146008175
Zfp498	ENSMUSG00000070420	5	146044212	146052338
Cyp3a57	ENSMUSG00000070419	5	146106148	146151381
Cyp3a16	ENSMUSG00000038656	5	146197178	146230592
Cyp3a41b	ENSMUSG00000075552	5	146319544	146345599
Cyp3a41a	ENSMUSG00000075551	5	146505635	146531712
Cyp3a44	ENSMUSG00000054417	5	146585559	146617450
Cyp3a11	ENSMUSG00000056035	5	146666002	146691540
Cyp3a25	ENSMUSG00000029630	5	146788770	146821194
Cyp3a59	ENSMUSG00000061292	5	146890834	146924861
2900089D17Rik	ENSMUSG00000087484	5	145002559	145017055
Gm15708	ENSMUSG00000086894	5	145037930	145041382
Gm15709	ENSMUSG00000083574	5	145167471	145167683
Gm6272	ENSMUSG00000082524	5	145484496	145484666
SNORA70	ENSMUSG00000088685	5	145535294	145535422
AC127411.1	ENSMUSG00000093455	5	145957917	145958194
Gm6309	ENSMUSG00000079096	5	146979552	146996880
Rnf6	ENSMUSG00000029634	5	147020768	147033131
Cdk8	ENSMUSG00000029635	5	147042806	147114450
Gm15739	ENSMUSG00000080957	5	147060127	147060998
Wasf3	ENSMUSG00000029636	5	147196561	147283987
Mir5105	ENSMUSG00000093077	5	147072579	147072660
Gsx1	ENSMUSG00000053129	5	148000272	148002523
Gm17398	ENSMUSG00000091377	5	148211130	148213493
Pdx1	ENSMUSG00000029644	5	148081535	148089584
Cdx2	ENSMUSG00000029646	5	148112381	148118846
Prhoxnb	ENSMUSG00000075543	5	148126562	148134016
Flt3	ENSMUSG00000042817	5	148142317	148212065
Pan3	ENSMUSG00000029647	5	148241737	148360078
Mtif3	ENSMUSG00000016510	5	147763149	147775376
Lnx2	ENSMUSG00000016520	5	147828231	147888162
Polr1d	ENSMUSG00000029642	5	147888626	147922937
Gm15633	ENSMUSG00000083988	5	147912138	147912629
2210019I11Rik	ENSMUSG00000092570	5	148040172	148083097
Gm6054	ENSMUSG00000057157	5	148220558	148220935
Gm6370	ENSMUSG00000079094	5	147302938	147305530
4930449I24Rik	ENSMUSG00000079093	5	147314004	147316759
Gm3402	ENSMUSG00000041505	5	147325701	147328300
Gm3404	ENSMUSG00000079091	5	147337377	147340129
Gm3409	ENSMUSG00000079090	5	147349252	147351825
Gm3415	ENSMUSG00000079089	5	147367740	147370313
Gpr12	ENSMUSG00000041468	5	147393727	147396815
Usp12	ENSMUSG00000029640	5	147546385	147606582
Rpl21	ENSMUSG00000041453	5	147644466	147648608
Rasl11a	ENSMUSG00000029641	5	147656647	147659302
Gm10858	ENSMUSG00000075546	5	147705790	147708726
Gtf3a	ENSMUSG00000016503	5	147760233	147767190
SNORA17	ENSMUSG00000077735	5	148011700	148011829
SNORD102	ENSMUSG00000077185	5	147646410	147646480
SNORA27	ENSMUSG00000077564	5	147646720	147646848
Flt1	ENSMUSG00000029648	5	148373180	148537587
Pomp	ENSMUSG00000029649	5	148672204	148687354
Slc46a3	ENSMUSG00000029650	5	148690013	148706391
Mtus2	ENSMUSG00000029651	5	148768896	149127641
Gm15721	ENSMUSG00000085565	5	148761458	148768742
Slc7a1	ENSMUSG00000041313	5	149138986	149211480
Ubl3	ENSMUSG00000001687	5	149316207	149364365
Gm10167	ENSMUSG00000066554	5	148994475	148995953
Ndufa4	ENSMUSG00000029632	6	11850373	11857446
Phf14	ENSMUSG00000029629	6	11857809	12031197
Gm6578	ENSMUSG00000057223	6	12049518	12059583
Thsd7a	ENSMUSG00000032625	6	12261610	12699410
U6	ENSMUSG00000064690	6	10790587	10790693
U7	ENSMUSG00000087969	6	12128349	12128400
Gm16123	ENSMUSG00000083794	6	12515518	12517222
n-R5s160	ENSMUSG00000065030	6	12692899	12693018
Gm15529	ENSMUSG00000083620	6	12807397	12808390
Gm6117	ENSMUSG00000086732	6	31524967	31526723
Gm13847	ENSMUSG00000086804	6	31555211	31693316
Gm13846	ENSMUSG00000086885	6	31601041	31612021
Gm13848	ENSMUSG00000084973	6	31612220	31616131
Gm13849	ENSMUSG00000087379	6	31736675	31872270
Gm13850	ENSMUSG00000085616	6	32062143	32063226
Gm13851	ENSMUSG00000086720	6	32253829	32266614
9430029A11Rik	ENSMUSG00000086675	6	32401170	32404750
B230378P21Rik	ENSMUSG00000086763	6	32461073	32465576
Gm13852	ENSMUSG00000084386	6	32560119	32560360
Gm14540	ENSMUSG00000085847	6	32988468	32993222
Gm1401	ENSMUSG00000082217	6	33197328	33198099
Gm13854	ENSMUSG00000083728	6	33325111	33327446
Podxl	ENSMUSG00000025608	6	31469488	31513981
1700012A03Rik	ENSMUSG00000029766	6	32000246	32008921
Plxna4	ENSMUSG00000029765	6	32094565	32538192
Chchd3	ENSMUSG00000053768	6	32740976	33010260
Exoc4	ENSMUSG00000029763	6	33199085	33923979
U6	ENSMUSG00000087777	6	33038646	33038749
Rpl30-ps1	ENSMUSG00000057696	6	38326807	38327154
Gm16563	ENSMUSG00000089905	6	38346267	38346689
Gm15697	ENSMUSG00000081670	6	38492303	38496074
4930599N23Rik	ENSMUSG00000073144	6	39068407	39098311
8030453O22Rik	ENSMUSG00000085058	6	39477512	39494485
Gm16272	ENSMUSG00000086582	6	39534091	39542783
Fth-ps2	ENSMUSG00000091313	6	39603449	39603964
Jhdm1d	ENSMUSG00000042599	6	39086622	39156788
Ttc26	ENSMUSG00000056832	6	38331469	38377647
Ubn2	ENSMUSG00000038538	6	38383925	38474825
1110001J03Rik	ENSMUSG00000019689	6	38483502	38489449
Luc7l2	ENSMUSG00000029823	6	38501334	38559470
Klrg2	ENSMUSG00000071537	6	38576660	38587239
Clec2l	ENSMUSG00000079598	6	38613069	38630863
Hipk2	ENSMUSG00000061436	6	38644389	38826189
Braf	ENSMUSG00000002413	6	39553236	39675462
Mrps33	ENSMUSG00000029918	6	39751803	39760987
Tbxas1	ENSMUSG00000029925	6	38825403	39034584
Parp12	ENSMUSG00000038507	6	39036409	39068348
Gm17451	ENSMUSG00000092140	6	38501531	38504007
Slc37a3	ENSMUSG00000029924	6	39284769	39327706
Rab19	ENSMUSG00000029923	6	39331174	39340379
Mkrn1	ENSMUSG00000029922	6	39347803	39370461
Gm10244	ENSMUSG00000068601	6	39369886	39371293
Dennd2a	ENSMUSG00000038456	6	39412377	39507866
Adck2	ENSMUSG00000046947	6	39523872	39546594
Ndufb2	ENSMUSG00000002416	6	39542573	39553381
Trim24	ENSMUSG00000029833	6	37820811	37916296
Svopl	ENSMUSG00000029830	6	37933739	37996996
Atp6v0a4	ENSMUSG00000038600	6	37998483	38074586
Tmem213	ENSMUSG00000029829	6	38059353	38065806
D630045J12Rik	ENSMUSG00000063455	6	38073174	38204009
Zc3hav1l	ENSMUSG00000047749	6	38237396	38249259
Zc3hav1	ENSMUSG00000029826	6	38255286	38304603
U6	ENSMUSG00000087924	6	38068383	38068486
AC153624.1	ENSMUSG00000093287	6	39411928	39412231
snoU13	ENSMUSG00000088263	6	38007973	38008076
U6	ENSMUSG00000089422	6	39215843	39215941
SNORA17	ENSMUSG00000077339	6	38963665	38963790
SNORA71	ENSMUSG00000064900	6	39372288	39372418
9530026P05Rik	ENSMUSG00000087573	6	92890363	93222883
Fgd5	ENSMUSG00000034037	6	91928872	92025998
4930466I24Rik	ENSMUSG00000087317	6	91962388	91966111
Nr2c2	ENSMUSG00000005893	6	92041384	92123051
Mrps25	ENSMUSG00000014551	6	92119519	92134027
Zfyve20	ENSMUSG00000014550	6	92136706	92164919
Trh	ENSMUSG00000005892	6	92192055	92194644
Prickle2	ENSMUSG00000030020	6	92320886	92656139
Adamts9	ENSMUSG00000030022	6	92722693	92893486
A730049H05Rik	ENSMUSG00000048636	6	92766472	92797168
Gm15737	ENSMUSG00000079462	6	92819351	92834405
Magi1	ENSMUSG00000045095	6	93625449	94233316
SNORA17	ENSMUSG00000077180	6	93285452	93285582
SNORA44	ENSMUSG00000089069	6	93840609	93840744
SNORA17	ENSMUSG00000088630	6	93459567	93459696
U6	ENSMUSG00000088627	6	93743766	93743871
Slc25a26	ENSMUSG00000045100	6	94450308	94554642
1700010K10Rik	ENSMUSG00000085413	6	95064011	95067625
AY512915	ENSMUSG00000068180	6	95205720	95283987
Kbtbd8	ENSMUSG00000030031	6	95067234	95079712
Gm10234	ENSMUSG00000068181	6	95272106	95272204
Suclg2	ENSMUSG00000061838	6	95423006	95668792
Lrig1	ENSMUSG00000030029	6	94554523	94650152
AC162038.1	ENSMUSG00000092767	6	94773727	94773799
U6	ENSMUSG00000065063	6	95050195	95050301
5_8S_rRNA	ENSMUSG00000088595	6	94776775	94776917
Fam19a1	ENSMUSG00000059187	6	96063148	96607192
1700123L14Rik	ENSMUSG00000072878	6	96114497	96116199
Fam19a4	ENSMUSG00000046500	6	96781203	97010405
A130022J15Rik	ENSMUSG00000035245	6	97060018	97099176
U6	ENSMUSG00000077598	6	96510755	96510858
U6	ENSMUSG00000065239	6	96419429	96419525
Gm4604	ENSMUSG00000091845	6	108090114	108090503
Il5ra	ENSMUSG00000005364	6	106660378	106695103
Trnt1	ENSMUSG00000013736	6	106719114	106732468
Crbn	ENSMUSG00000005362	6	106728243	106750068
Lrrn1	ENSMUSG00000034648	6	107479779	107520204
Setmar	ENSMUSG00000034639	6	108015039	108027116
Sumf1	ENSMUSG00000030101	6	108057022	108135576
Itpr1	ENSMUSG00000030102	6	108163112	108501103
Cntn4	ENSMUSG00000064293	6	105627654	106649304
AC167724.1	ENSMUSG00000093127	6	107398813	107398938
U6	ENSMUSG00000064466	6	106951446	106951552
Gm16433	ENSMUSG00000043024	6	108513599	108515582
0610040F04Rik	ENSMUSG00000087341	6	108527033	108610928
Gm17055	ENSMUSG00000090576	6	108606911	108609411
Bhlhe40	ENSMUSG00000030103	6	108610623	108616919
Arl8b	ENSMUSG00000030105	6	108733053	108773717
Edem1	ENSMUSG00000030104	6	108778635	108809350
Gm6749	ENSMUSG00000068102	6	108831995	108832405
Grm7	ENSMUSG00000056755	6	110595575	111517224
Gm20387	ENSMUSG00000092448	6	110589747	110595910
Gm20386	ENSMUSG00000092603	6	110688344	110688475
Cpne9	ENSMUSG00000030270	6	113232301	113255621
Brpf1	ENSMUSG00000001632	6	113257175	113274851
Ogg1	ENSMUSG00000030271	6	113276966	113285062
Camk1	ENSMUSG00000030272	6	113284118	113293978
Tada3	ENSMUSG00000048930	6	113316019	113327877
Arpc4	ENSMUSG00000079426	6	113328107	113340442
Ttll3	ENSMUSG00000030276	6	113339254	113364577
Rpusd3	ENSMUSG00000051169	6	113365313	113369342
Cidec	ENSMUSG00000030278	6	113374628	113385754
Jagn1	ENSMUSG00000051256	6	113392563	113398223
Il17re	ENSMUSG00000043088	6	113408478	113420745
Il17rc	ENSMUSG00000030281	6	113421421	113433134
Creld1	ENSMUSG00000030284	6	113433291	113443332
Prrt3	ENSMUSG00000045009	6	113444089	113451887
Gm16598	ENSMUSG00000086198	6	112646771	112654662
Lmcd1	ENSMUSG00000057604	6	112223752	112280419
5031434C07Rik	ENSMUSG00000044574	6	112235851	112238831
D630042P16Rik	ENSMUSG00000034387	6	112309318	112338017
Gm17462	ENSMUSG00000091626	6	112387465	112389330
Cav3	ENSMUSG00000062694	6	112409495	112422865
Oxtr	ENSMUSG00000049112	6	112423678	112440884
Rad18	ENSMUSG00000030254	6	112569844	112646680
Srgap3	ENSMUSG00000030257	6	112667965	112897260
Thumpd3	ENSMUSG00000030264	6	112996219	113018267
Setd5	ENSMUSG00000034269	6	113027359	113103429
Gm15519	ENSMUSG00000083443	6	112513636	112515201
Gm5578	ENSMUSG00000029633	6	112555538	112556773
Gm6134	ENSMUSG00000078281	6	112926207	112926377
Gt(ROSA)26Sor	ENSMUSG00000086429	6	113017422	113027327
Gm16161	ENSMUSG00000090194	6	113225831	113226924
Gm15492	ENSMUSG00000085012	6	113258660	113276741
Mtmr14	ENSMUSG00000030269	6	113187837	113231386
Lhfpl4	ENSMUSG00000042873	6	113118084	113145378
U6	ENSMUSG00000064568	6	112542961	112543067
n-R5s165	ENSMUSG00000077262	6	112184157	112184256
U6	ENSMUSG00000065309	6	112985837	112985928
7SK	ENSMUSG00000088572	6	111949321	111949635
7SK	ENSMUSG00000089490	6	111942104	111942418
5S_rRNA	ENSMUSG00000089605	6	111553246	111553356
7SK	ENSMUSG00000089084	6	111577982	111578277
U6	ENSMUSG00000077431	6	113010692	113010797
Tmem111	ENSMUSG00000030286	6	113464868	113481632
AC153910.1	ENSMUSG00000092760	6	113478544	113478668
Fancd2	ENSMUSG00000034023	6	113481676	113547011
AC153589.1	ENSMUSG00000093201	6	113492432	113492759
4931417G12Rik	ENSMUSG00000033963	6	113546755	113550709
6720456B07Rik	ENSMUSG00000033940	6	113554766	113566942
Vhl	ENSMUSG00000033933	6	113573953	113581627
1700015O11Rik	ENSMUSG00000087631	6	113581639	113583138
Irak2	ENSMUSG00000060477	6	113588461	113645003
Tatdn2	ENSMUSG00000056952	6	113647044	113661063
Ghrl	ENSMUSG00000064177	6	113666113	113669874
Sec13	ENSMUSG00000030298	6	113678061	113690737
Atp2b2	ENSMUSG00000030302	6	113695663	113992607
Slc6a11	ENSMUSG00000030307	6	114081235	114199880
Slc6a1	ENSMUSG00000030310	6	114232629	114267516
Hrh1	ENSMUSG00000053004	6	114347930	114433290
Atg7	ENSMUSG00000030314	6	114593149	114810431
Gm15082	ENSMUSG00000087053	6	113887733	113890200
Gm15083	ENSMUSG00000087083	6	113954783	114002102
Tas2r125	ENSMUSG00000059410	6	132859669	132860605
Tas2r129	ENSMUSG00000063762	6	132901120	132910756
Tas2r131	ENSMUSG00000057699	6	132906930	132908551
Tas2r109	ENSMUSG00000062528	6	132930033	132930983
Tas2r103	ENSMUSG00000030196	6	132986181	132987119
Tas2r140	ENSMUSG00000071147	6	133004835	133005834
2700089E24Rik	ENSMUSG00000072704	6	133055257	133057765
5530400C23Rik	ENSMUSG00000055594	6	133242234	133245808
Kap	ENSMUSG00000032758	6	133799873	133803685
Etv6	ENSMUSG00000030199	6	133985718	134220176
Bcl2l14	ENSMUSG00000030200	6	134346336	134388754
Lrp6	ENSMUSG00000030201	6	134396494	134516983
Mansc1	ENSMUSG00000032718	6	134559228	134582506
Loh12cr1	ENSMUSG00000042992	6	134589645	134661202
Dusp16	ENSMUSG00000030203	6	134665488	134742643
Crebl2	ENSMUSG00000032652	6	134780172	134808949
Gpr19	ENSMUSG00000032641	6	134819111	134847943
Gm17088	ENSMUSG00000091438	6	134118897	134122025
Gm17089	ENSMUSG00000092134	6	134183176	134193729
AC122359.1	ENSMUSG00000093148	6	133711706	133711788
AC122520.2	ENSMUSG00000077115	6	133146658	133146767
AC122520.1	ENSMUSG00000077093	6	133141810	133141919
Cdkn1b	ENSMUSG00000003031	6	134870419	134875531
Gm17574	ENSMUSG00000091384	7	19967569	19978067
Gm17375	ENSMUSG00000092002	7	20182642	20187643
Rsph6a	ENSMUSG00000040866	7	19640039	19659796
Dmwd	ENSMUSG00000030410	7	19661598	19668125
Dmpk	ENSMUSG00000030409	7	19669198	19679170
Six5	ENSMUSG00000040841	7	19679943	19683898
Gm4969	ENSMUSG00000085601	7	19686900	19703717
Fbxo46	ENSMUSG00000050428	7	19705208	19723610
Qpctl	ENSMUSG00000030407	7	19725566	19734545
Snrpd2	ENSMUSG00000040824	7	19735071	19738084
Gipr	ENSMUSG00000030406	7	19742474	19751476
Eml2	ENSMUSG00000040811	7	19761770	19791831
Gpr4	ENSMUSG00000044317	7	19797887	19809525
Opa3	ENSMUSG00000052214	7	19813683	19841892
Vasp	ENSMUSG00000030403	7	19842278	19857166
Ppm1n	ENSMUSG00000030402	7	19862156	19865398
Rtn2	ENSMUSG00000030401	7	19868011	19881513
Fosb	ENSMUSG00000003545	7	19888070	19895394
Ercc1	ENSMUSG00000003549	7	19930127	19941873
Cd3eap	ENSMUSG00000047649	7	19942198	19944832
Ppp1r13l	ENSMUSG00000040734	7	19945098	19963882
Ercc2	ENSMUSG00000030400	7	19967359	19981043
Klc3	ENSMUSG00000040714	7	19979786	19989453
Ckm	ENSMUSG00000030399	7	19996443	20006932
Gm17405	ENSMUSG00000091658	7	19996973	19997621
A930016O22Rik	ENSMUSG00000040705	7	20004161	20006766
Mark4	ENSMUSG00000030397	7	20010816	20043843
Exoc3l2	ENSMUSG00000011263	7	20074405	20082109
Bloc1s3	ENSMUSG00000057667	7	20091163	20093680
Trappc6a	ENSMUSG00000002043	7	20094019	20101494
Nkpd1	ENSMUSG00000060621	7	20104080	20110399
Ppp1r37	ENSMUSG00000051403	7	20116316	20147747
Gemin7	ENSMUSG00000044709	7	20150295	20159172
Gm17370	ENSMUSG00000092034	7	19547764	19550522
Gm17589	ENSMUSG00000090995	7	19883609	19886119
Gm16733	ENSMUSG00000085994	7	20355960	20360752
Gm16266	ENSMUSG00000086533	7	19578902	19586571
1700058P15Rik	ENSMUSG00000089636	7	19843841	19845088
Gm20512	ENSMUSG00000092381	7	20300365	20307080
Gm16175	ENSMUSG00000087206	7	20394958	20397221
Gm16174	ENSMUSG00000087593	7	20401902	20403974
Gm16184	ENSMUSG00000089886	7	20497174	20497746
Gm16251	ENSMUSG00000090075	7	20506078	20512956
Vmn1r-ps79	ENSMUSG00000090633	7	20942075	20944167
Psg28	ENSMUSG00000030373	7	19007887	19017404
Psg26	ENSMUSG00000070799	7	19059932	19069498
Psg25	ENSMUSG00000070798	7	19105053	19117576
Psg27	ENSMUSG00000070797	7	19141864	19152654
Psg23	ENSMUSG00000074359	7	19191692	19201850
Psg21	ENSMUSG00000070796	7	19232003	19242074
Psg20	ENSMUSG00000063305	7	19259456	19271534
Psg22	ENSMUSG00000044903	7	19303439	19312597
Psg19	ENSMUSG00000004542	7	19374474	19383859
Psg17	ENSMUSG00000004540	7	19399286	19406956
Mill2	ENSMUSG00000040987	7	19425315	19444003
Pglyrp1	ENSMUSG00000030413	7	19470039	19475787
Ccdc61	ENSMUSG00000074358	7	19476232	19495764
Nova2	ENSMUSG00000030411	7	19510698	19551031
Nanos2	ENSMUSG00000051965	7	19572873	19574311
Gm10676	ENSMUSG00000074355	7	19574903	19578123
Mypop	ENSMUSG00000048481	7	19576594	19587115
Irf2bp1	ENSMUSG00000044030	7	19589414	19592110
Foxa3	ENSMUSG00000040891	7	19598631	19608887
Sympk	ENSMUSG00000023118	7	19609726	19639967
Tomm40	ENSMUSG00000002984	7	20286662	20300787
Pvrl2	ENSMUSG00000062300	7	20301993	20334922
Bcam	ENSMUSG00000002980	7	20341480	20356365
Cblc	ENSMUSG00000040525	7	20364230	20382158
Bcl3	ENSMUSG00000053175	7	20393811	20408119
Gm19345	ENSMUSG00000092216	7	20437352	20443696
Ceacam16	ENSMUSG00000014686	7	20437446	20446648
Ceacam19	ENSMUSG00000049848	7	20461091	20473314
Pvr	ENSMUSG00000040511	7	20488927	20506509
2210010C17Rik	ENSMUSG00000040498	7	20522654	20536092
Rpl7a-ps8	ENSMUSG00000070778	7	20539120	20539932
Ceacam20	ENSMUSG00000070777	7	20550761	20576462
Nlrp9b	ENSMUSG00000060508	7	20593372	20658655
Vmn1r91	ENSMUSG00000090393	7	20686507	20687430
Gm16442	ENSMUSG00000074334	7	20707005	20707928
Vmn1r93	ENSMUSG00000074333	7	20723472	20724437
Vmn1r94	ENSMUSG00000091701	7	20752809	20753726
Vmn1r95	ENSMUSG00000091197	7	20779059	20779982
Gm6164	ENSMUSG00000091161	7	20790033	20790956
Gm4498	ENSMUSG00000091493	7	20818257	20819177
Gm5890	ENSMUSG00000078792	7	20845800	20848183
Gm4133	ENSMUSG00000092347	7	20918491	20919414
Gm5728	ENSMUSG00000078419	7	20959842	20960759
Zfp296	ENSMUSG00000011267	7	20162636	20166005
Clasrp	ENSMUSG00000061028	7	20166393	20189817
Relb	ENSMUSG00000002983	7	20191566	20214787
Clptm1	ENSMUSG00000002981	7	20216930	20250379
Apoc2	ENSMUSG00000002992	7	20256928	20266772
Apoc4	ENSMUSG00000074336	7	20263443	20266765
Apoc1	ENSMUSG00000040564	7	20274833	20278007
Apoe	ENSMUSG00000002985	7	20281458	20284515
U1	ENSMUSG00000064580	7	19827479	19827638
U1	ENSMUSG00000065388	7	20046146	20046284
n-R5s152	ENSMUSG00000070150	7	20595433	20595551
Mir330	ENSMUSG00000065543	7	19766814	19766911
U6	ENSMUSG00000065313	7	19134434	19134540
U6	ENSMUSG00000065368	7	19330452	19330558
[truncated: 2,924 more rows]

## Sheet: longevityIgG3-Prn
Gene Name	Ensembl Gene ID	Chromosome	Start	End
Stk25	ENSMUSG00000026277	1	95518479	95532299
Bok	ENSMUSG00000026278	1	95582271	95592339
Thap4	ENSMUSG00000026279	1	95601968	95651415
Atg4b	ENSMUSG00000026280	1	95648077	95686372
Dtymk	ENSMUSG00000026281	1	95689153	95698511
Ing5	ENSMUSG00000026283	1	95700542	95718678
D2hgdh	ENSMUSG00000073609	1	95721817	95748925
Gal3st2	ENSMUSG00000034005	1	95757921	95773071
Gm9994	ENSMUSG00000056307	1	95824364	95839221
Gm7889	ENSMUSG00000091067	1	95879623	95882396
Gm6086	ENSMUSG00000073608	1	95887086	95908118
Neu4	ENSMUSG00000034000	1	95917070	95924903
Pdcd1	ENSMUSG00000026285	1	95934884	95949130
Gm17386	ENSMUSG00000091447	1	96048774	96049705
Fam174a	ENSMUSG00000051185	1	97210205	97231861
St8sia4	ENSMUSG00000040710	1	97484261	97564171
Gm15427	ENSMUSG00000081051	1	97395142	97395805
U7	ENSMUSG00000088333	1	97462119	97462181
U6	ENSMUSG00000088961	1	95705147	95705248
SNORD30	ENSMUSG00000077413	1	96512213	96512281
AC131316.1	ENSMUSG00000093284	1	95549077	95549367
SNORA17	ENSMUSG00000089310	1	96936511	96936620
U6	ENSMUSG00000065342	1	97728706	97728812
AC102463.2	ENSMUSG00000077860	1	98163428	98163518
AC102463.1	ENSMUSG00000077014	1	98199723	98199832
U6	ENSMUSG00000064461	1	98513676	98513782
Slco4c1	ENSMUSG00000040693	1	98715361	98768748
Slco6b1	ENSMUSG00000045463	1	98808389	98894154
Slco6b1	ENSMUSG00000090974	1	98802753	98894154
Gm5101	ENSMUSG00000092052	1	98768798	98777807
SNORA17	ENSMUSG00000077255	1	98658608	98658735
Slco6c1	ENSMUSG00000026331	1	98955615	99024830
Gm6430	ENSMUSG00000044757	1	98921090	98923123
D1Ertd622e	ENSMUSG00000044768	1	99540480	99558651
Ppip5k2	ENSMUSG00000040648	1	99602625	99666988
Gin1	ENSMUSG00000026333	1	99666749	99690286
Pam	ENSMUSG00000026335	1	99691691	99992223
7SK	ENSMUSG00000089169	1	99832977	99833288
Gm3531	ENSMUSG00000089782	1	99845478	99845966
B230216N24Rik	ENSMUSG00000089706	1	99927693	99954257
Slco6d1	ENSMUSG00000026336	1	100317701	100413565
Gm3555	ENSMUSG00000089791	1	100354345	100355739
AC102227.1	ENSMUSG00000077048	1	100446028	100446137
U6	ENSMUSG00000065921	1	99946399	99946505
Cntnap5b	ENSMUSG00000067028	1	101669342	102382519
Gm7110	ENSMUSG00000082431	1	101687006	101687602
U6	ENSMUSG00000087804	1	100913941	100914040
SNORA17	ENSMUSG00000087883	1	102149494	102149625
AC111074.1	ENSMUSG00000077039	1	102758370	102758478
SNORA17	ENSMUSG00000077295	1	104003026	104003157
SNORA17	ENSMUSG00000088510	1	104310500	104310598
SNORA17	ENSMUSG00000087908	1	104849992	104850125
SNORA17	ENSMUSG00000088594	1	105133203	105133344
Cdh20	ENSMUSG00000050840	1	106665106	106892058
Rnf152	ENSMUSG00000047496	1	107173494	107253287
Pign	ENSMUSG00000056536	1	107417716	107555585
2310035C23Rik	ENSMUSG00000026319	1	107560438	107651708
Tnfrsf11a	ENSMUSG00000026321	1	107677300	107744558
Zcchc2	ENSMUSG00000038866	1	107886983	107930651
Phlpp1	ENSMUSG00000044340	1	108068329	108290827
Bcl2	ENSMUSG00000057329	1	108434755	108610851
Gm17634	ENSMUSG00000090759	1	107252584	107258201
Gm3608	ENSMUSG00000067017	1	107352560	107353433
Gm10193	ENSMUSG00000067015	1	107661021	107661251
D630008O14Rik	ENSMUSG00000054006	1	108438520	108471622
Gm15699	ENSMUSG00000089866	1	106808008	106808910
U7	ENSMUSG00000089332	1	106793128	106793191
n-R5s216	ENSMUSG00000084704	1	106777501	106777612
AC101970.1	ENSMUSG00000080661	1	106641247	106641336
AC132082.1	ENSMUSG00000076999	1	107471264	107471359
U6	ENSMUSG00000089206	1	107842131	107842237
Kdsr	ENSMUSG00000009905	1	108616987	108656319
Vps4b	ENSMUSG00000009907	1	108660648	108693305
Serpinb5	ENSMUSG00000067006	1	108757750	108779925
Pou2f3-rs1	ENSMUSG00000083613	1	108784429	108785474
1700084C01Rik	ENSMUSG00000070532	1	171858779	171864784
Hsd17b7	ENSMUSG00000026675	1	171879666	171899372
Ddr2	ENSMUSG00000026674	1	171902439	172040632
Uap1	ENSMUSG00000026670	1	172072069	172105088
Uhmk1	ENSMUSG00000026667	1	172123551	172145528
4930500M09Rik	ENSMUSG00000044306	1	172144991	172145687
Sh2d1b2	ENSMUSG00000073494	1	172162880	172183739
Sh2d1b1	ENSMUSG00000026673	1	172207507	172216900
Gm7694	ENSMUSG00000079188	1	172231277	172232958
Nos1ap	ENSMUSG00000038473	1	172232799	172519992
1700015E13Rik	ENSMUSG00000042800	1	172238934	172242256
Olfml2b	ENSMUSG00000038463	1	172574663	172612920
Atf6	ENSMUSG00000026663	1	172634588	172797902
Dusp12	ENSMUSG00000026659	1	172803629	172815671
Fcrlb	ENSMUSG00000070524	1	172837404	172843072
Fcrla	ENSMUSG00000038421	1	172847707	172857714
Fcgr2b	ENSMUSG00000026656	1	172890689	172906678
Fcgr4	ENSMUSG00000059089	1	172949051	172959892
Fcgr3	ENSMUSG00000059498	1	172981300	172995066
1700009P17Rik	ENSMUSG00000026649	1	173044049	173057098
Sdhc	ENSMUSG00000058076	1	173057296	173080734
Mpz	ENSMUSG00000056569	1	173080842	173091261
Pcp4l1	ENSMUSG00000038370	1	173103393	173126399
Nr1i3	ENSMUSG00000005677	1	173144101	173150832
Tomm40l	ENSMUSG00000005674	1	173147933	173152645
Apoa2	ENSMUSG00000005681	1	173155185	173156510
Fcer1g	ENSMUSG00000058715	1	173159703	173164496
Ndufs2	ENSMUSG00000013593	1	173164984	173177253
Adamts4	ENSMUSG00000006403	1	173180552	173190768
B4galt3	ENSMUSG00000052423	1	173200459	173207027
Ppox	ENSMUSG00000062729	1	173206121	173211317
Usp21	ENSMUSG00000053483	1	173212076	173218122
Ufc1	ENSMUSG00000062963	1	173218694	173225155
Rpl27-ps1	ENSMUSG00000079137	1	173235215	173235625
Dedd	ENSMUSG00000013973	1	173259276	173272462
Nit1	ENSMUSG00000013997	1	173268139	173275777
Pfdn2	ENSMUSG00000006412	1	173275801	173289385
Klhdc9	ENSMUSG00000045259	1	173288577	173290929
Pvrl4	ENSMUSG00000006411	1	173300230	173318729
Arhgap30	ENSMUSG00000048865	1	173319085	173340429
Usf1	ENSMUSG00000026641	1	173341444	173349273
Tstd1	ENSMUSG00000091166	1	173349164	173350483
F11r	ENSMUSG00000038235	1	173367666	173394734
B930036N10Rik	ENSMUSG00000091993	1	173432927	173434242
Alyref2	ENSMUSG00000060244	1	173433609	173434881
Gm9765	ENSMUSG00000038218	1	173445364	173447053
Itln1	ENSMUSG00000038209	1	173448253	173465425
Cd244	ENSMUSG00000004709	1	173489324	173515449
Ly9	ENSMUSG00000004707	1	173518755	173537541
Slamf7	ENSMUSG00000038179	1	173562534	173579149
Cd48	ENSMUSG00000015355	1	173612140	173635389
Slamf1	ENSMUSG00000015316	1	173697258	173731315
Cd84	ENSMUSG00000038147	1	173769828	173820849
Gm10521	ENSMUSG00000073492	1	173825795	173828368
3110045C21Rik	ENSMUSG00000085494	1	171899540	171902526
Gm15852	ENSMUSG00000089990	1	171862829	171864379
Gm9929	ENSMUSG00000053925	1	172798776	172811852
Gm2962	ENSMUSG00000089838	1	172855440	172855775
Gm15431	ENSMUSG00000059058	1	173641219	173641413
Gm17520	ENSMUSG00000092117	1	173353316	173367449
U6	ENSMUSG00000064448	1	172762896	172763002
U5	ENSMUSG00000065033	1	173433179	173433294
U6	ENSMUSG00000065390	1	173663430	173663536
SNORA40	ENSMUSG00000087747	1	173238178	173238268
U6	ENSMUSG00000064611	1	172681848	172681954
U6	ENSMUSG00000088291	1	173662191	173662245
U1	ENSMUSG00000065905	1	172958096	172958260
Slamf6	ENSMUSG00000015314	1	173847646	173879083
Vangl2	ENSMUSG00000026556	1	173931091	173958575
Nhlh1	ENSMUSG00000051251	1	173982423	173987704
Ncstn	ENSMUSG00000003458	1	173996144	174012926
Copa	ENSMUSG00000026553	1	174012660	174052461
Pex19	ENSMUSG00000003464	1	174056886	174066624
Dcaf8	ENSMUSG00000026554	1	174078146	174126524
Pea15a	ENSMUSG00000013698	1	174126859	174136935
Casq1	ENSMUSG00000007122	1	174140025	174150026
Atp1a4	ENSMUSG00000007107	1	174153644	174188545
Gm10171	ENSMUSG00000089803	1	174074403	174075032
Gm17224	ENSMUSG00000092085	1	174143152	174143811
Pyhin1	ENSMUSG00000043263	1	175560990	175578059
Pydc3	ENSMUSG00000066677	1	175604042	175628523
AI607873	ENSMUSG00000073490	1	175653814	175671878
Ifi204	ENSMUSG00000073489	1	175677424	175697050
Mndal	ENSMUSG00000090272	1	175787352	175872622
Mnda	ENSMUSG00000026536	1	175826486	175843053
Ifi203	ENSMUSG00000039997	1	175850538	175872803
Ifi202b	ENSMUSG00000026535	1	175892700	175912975
Ifi205	ENSMUSG00000054203	1	175942129	175961886
Olfr433	ENSMUSG00000045381	1	175972064	175973067
Olfr432	ENSMUSG00000047048	1	175980506	175981444
Olfr430	ENSMUSG00000050134	1	175999431	176000384
Olfr429	ENSMUSG00000049528	1	176019169	176020111
Olfr427	ENSMUSG00000059371	1	176029591	176030538
Olfr231	ENSMUSG00000046486	1	176047222	176048145
Olfr424	ENSMUSG00000051528	1	176066877	176067824
Olfr421	ENSMUSG00000091950	1	176081612	176082661
Olfr420	ENSMUSG00000055033	1	176088853	176089898
Spna1	ENSMUSG00000026532	1	176102907	176178581
Olfr419	ENSMUSG00000050788	1	176180020	176181107
1810030J14Rik	ENSMUSG00000026531	1	176260649	176263004
Olfr417	ENSMUSG00000066672	1	176299050	176299979
Olfr248	ENSMUSG00000059503	1	176321177	176322186
Olfr414	ENSMUSG00000051509	1	176360561	176361515
Olfr220	ENSMUSG00000066671	1	176378756	176379733
Fmn2	ENSMUSG00000028354	1	176431956	176752848
Grem2	ENSMUSG00000050069	1	176763916	176851950
Rgs7	ENSMUSG00000026527	1	176989867	177421261
Fh1	ENSMUSG00000026526	1	177530505	177555766
Gm16340	ENSMUSG00000090222	1	175705968	175732851
Kmo	ENSMUSG00000039783	1	177550512	177592247
Opn3	ENSMUSG00000026525	1	177592552	177622907
Chml	ENSMUSG00000078185	1	177616619	177618484
Wdr64	ENSMUSG00000026523	1	177628724	177745865
Exo1	ENSMUSG00000039748	1	177810909	177841527
Pld5	ENSMUSG00000055214	1	177892437	178205443
B020018G12Rik	ENSMUSG00000078184	1	177907908	177909245
U6	ENSMUSG00000065666	1	177834676	177834782
U2	ENSMUSG00000077794	1	177730645	177730820
Esrrg	ENSMUSG00000026610	1	189432670	190038764
Ush2a	ENSMUSG00000026609	1	190085902	190788920
Kctd3	ENSMUSG00000026608	1	190794977	190831719
Kcnk2	ENSMUSG00000037624	1	191031816	191167711
AC121892.1	ENSMUSG00000077884	1	190343232	190343322
SNORA17	ENSMUSG00000077235	1	190446802	190446932
U6	ENSMUSG00000084550	1	190584355	190584458
mmu-mir-1194	ENSMUSG00000080505	1	191217229	191217349
Cenpf	ENSMUSG00000026605	1	191464478	191511965
Ptpn14	ENSMUSG00000026604	1	191552147	191700574
Smyd2	ENSMUSG00000026603	1	191704371	191746242
Gm17653	ENSMUSG00000090445	1	191657020	191660499
Gm13461	ENSMUSG00000081999	2	41842685	41844369
Gm13463	ENSMUSG00000081085	2	41980141	41980373
Lrp1b	ENSMUSG00000049252	2	40450768	42509118
SNORA17	ENSMUSG00000077351	2	42664555	42664686
Srsf6	ENSMUSG00000016921	2	162757264	162762857
L3mbtl1	ENSMUSG00000035576	2	162769201	162800258
Sgk2	ENSMUSG00000017868	2	162813066	162839863
Ift52	ENSMUSG00000017858	2	162843090	162871877
Mybl2	ENSMUSG00000017861	2	162880423	162910424
Gtsf1l	ENSMUSG00000070708	2	162912767	162913590
Tox2	ENSMUSG00000074607	2	163028861	163149906
Jph2	ENSMUSG00000017817	2	163161978	163223729
3230401D17Rik	ENSMUSG00000035399	2	163231558	163250433
Gdap1l1	ENSMUSG00000017943	2	163264212	163281060
Fitm2	ENSMUSG00000048486	2	163292115	163298365
2310001K24Rik	ENSMUSG00000053353	2	163298327	163298647
R3hdml	ENSMUSG00000078949	2	163318054	163328348
Hnf4a	ENSMUSG00000017950	2	163332544	163398646
Ttpal	ENSMUSG00000017679	2	163428050	163444749
Serinc3	ENSMUSG00000017707	2	163449008	163470867
0610039K10Rik	ENSMUSG00000058812	2	163470586	163471536
Pkig	ENSMUSG00000035268	2	163484122	163551894
Ada	ENSMUSG00000017697	2	163552320	163575975
Wisp2	ENSMUSG00000027656	2	163646597	163658882
Kcnk15	ENSMUSG00000035238	2	163679387	163685482
Rims4	ENSMUSG00000035226	2	163685487	163744419
Ywhab	ENSMUSG00000018326	2	163820696	163844324
Pabpc1l	ENSMUSG00000054582	2	163851186	163876274
Tomm34	ENSMUSG00000018322	2	163879276	163896905
Stk4	ENSMUSG00000018209	2	163896058	163981260
Kcns1	ENSMUSG00000040164	2	163989355	163996849
Wfdc5	ENSMUSG00000040154	2	164002063	164008478
Wfdc12	ENSMUSG00000042845	2	164014967	164016344
Wfdc15a	ENSMUSG00000051769	2	164024599	164025866
Wfdc15b	ENSMUSG00000018211	2	164040190	164047396
Svs2	ENSMUSG00000040132	2	164061665	164064202
Svs3b	ENSMUSG00000050383	2	164080099	164082376
Svs4	ENSMUSG00000016998	2	164101688	164104195
Svs3a	ENSMUSG00000017003	2	164115004	164117236
Svs6	ENSMUSG00000017000	2	164142487	164144189
Svs5	ENSMUSG00000017004	2	164158476	164160132
Slpi	ENSMUSG00000017002	2	164179806	164214831
Matn4	ENSMUSG00000016995	2	164215129	164230660
Rbpjl	ENSMUSG00000017007	2	164228641	164240948
Sdc4	ENSMUSG00000017009	2	164249747	164269387
Sys1	ENSMUSG00000045503	2	164282464	164305138
Gm20458	ENSMUSG00000090996	2	164286467	164316260
Trp53tg5	ENSMUSG00000017720	2	164295801	164299224
Dbndd2	ENSMUSG00000017734	2	164311606	164318819
Pigt	ENSMUSG00000017721	2	164323020	164333801
Wfdc2	ENSMUSG00000017723	2	164387913	164394010
Spint3	ENSMUSG00000074596	2	164395195	164398959
Wfdc6a	ENSMUSG00000074595	2	164405019	164410947
Spinlw1	ENSMUSG00000017733	2	164413843	164419094
Wfdc8	ENSMUSG00000070533	2	164421958	164439126
Wfdc6b	ENSMUSG00000070531	2	164439022	164443712
Wfdc16	ENSMUSG00000070530	2	164460207	164464302
Wfdc9	ENSMUSG00000074594	2	164475131	164482083
Wfdc10	ENSMUSG00000070529	2	164481440	164482868
Wfdc11	ENSMUSG00000078940	2	164488394	164499587
Wfdc13	ENSMUSG00000067704	2	164510607	164513206
Spint4	ENSMUSG00000017310	2	164524001	164527953
Gm14316	ENSMUSG00000074593	2	164540805	164543568
Wfdc3	ENSMUSG00000076434	2	164556680	164571431
Wfdc3	ENSMUSG00000039951	2	164569065	164571431
Dnttip1	ENSMUSG00000017299	2	164571483	164594107
Ube2c	ENSMUSG00000001403	2	164595398	164604322
Tnnc2	ENSMUSG00000017300	2	164602661	164605467
Snx21	ENSMUSG00000050373	2	164611323	164619316
Acot8	ENSMUSG00000017307	2	164618268	164630382
Zswim3	ENSMUSG00000045822	2	164630598	164647630
Gm14255	ENSMUSG00000086030	2	162692815	162693930
Gm11451	ENSMUSG00000083567	2	162724630	162725259
Gm11452	ENSMUSG00000082514	2	162733660	162734349
Gm11453	ENSMUSG00000080962	2	162807991	162808997
Gm11454	ENSMUSG00000086152	2	162948342	162969695
Gm14254	ENSMUSG00000086036	2	162978631	162981842
0610008F07Rik	ENSMUSG00000046840	2	163319543	163367456
Gm16316	ENSMUSG00000087129	2	163510740	163518015
Gm14265	ENSMUSG00000082747	2	163660712	163661016
Gm11455	ENSMUSG00000085538	2	163961439	163966155
A730032A03Rik	ENSMUSG00000085649	2	164003320	164022300
Gm14302	ENSMUSG00000085760	2	164285396	164286455
Gm14317	ENSMUSG00000086179	2	164376030	164385230
Gm11456	ENSMUSG00000083740	2	164468445	164468700
Gm11457	ENSMUSG00000086453	2	164579742	164595166
SNORA17	ENSMUSG00000077671	2	164447422	164447552
n-R5s207	ENSMUSG00000084446	2	163983140	163983257
U1	ENSMUSG00000088064	2	162642047	162642204
U6	ENSMUSG00000065797	2	164427436	164427542
7SK	ENSMUSG00000088226	2	164587159	164587474
U6	ENSMUSG00000088408	2	163340252	163340354
AL591584.1	ENSMUSG00000092791	2	162918635	162918759
BX323066.1	ENSMUSG00000093174	2	164637044	164637321
Zswim1	ENSMUSG00000017764	2	164648186	164652371
1700020C07Rik	ENSMUSG00000017767	2	164651889	164654037
Neurl2	ENSMUSG00000039873	2	164656232	164658956
Ctsa	ENSMUSG00000017760	2	164658373	164666532
Pltp	ENSMUSG00000017754	2	164665018	164683211
Pcif1	ENSMUSG00000039849	2	164704804	164719954
Zfp335	ENSMUSG00000039834	2	164717382	164737257
Mmp9	ENSMUSG00000017737	2	164766280	164781350
Slc12a5	ENSMUSG00000017740	2	164786316	164825228
Ncoa5	ENSMUSG00000039804	2	164825857	164860367
Cd40	ENSMUSG00000017652	2	164881127	164898448
1700025C18Rik	ENSMUSG00000078935	2	164904193	164916250
Cdh22	ENSMUSG00000053166	2	164937007	165060353
Gm11458	ENSMUSG00000085436	2	164736854	164745453
Gm11459	ENSMUSG00000087503	2	164786302	164788252
Gm14397	ENSMUSG00000086630	2	164984912	164989469
Ptpn1	ENSMUSG00000027540	2	167757557	167804885
Fam65c	ENSMUSG00000074577	2	167805664	167836118
Pard6b	ENSMUSG00000044641	2	167906504	167926703
Adnp	ENSMUSG00000051149	2	168006486	168032612
Dpm1	ENSMUSG00000078919	2	168034548	168056091
Mocs3	ENSMUSG00000074576	2	168056122	168058094
Kcng1	ENSMUSG00000074575	2	168085617	168107236
Nfatc2	ENSMUSG00000027544	2	168301910	168427157
Atp9a	ENSMUSG00000027546	2	168459938	168567909
Sall4	ENSMUSG00000027547	2	168573832	168593443
Zfp64	ENSMUSG00000027551	2	168718831	168781087
Gm9873	ENSMUSG00000052368	2	168845770	168846866
1700101G07Rik	ENSMUSG00000074571	2	169407581	169408733
Gm11011	ENSMUSG00000078912	2	169408912	169413245
Tshz2	ENSMUSG00000047907	2	169458513	169897316
AY702102	ENSMUSG00000067581	2	169787628	169788487
Gm16898	ENSMUSG00000086463	2	169459146	169714003
Gm14262	ENSMUSG00000086783	2	168114519	168120621
Gm14234	ENSMUSG00000082239	2	168243230	168244074
Gm14261	ENSMUSG00000085322	2	168591643	168593608
1700017J07Rik	ENSMUSG00000086348	2	168803768	168804406
Gm14260	ENSMUSG00000086658	2	168812066	168812873
Gm14258	ENSMUSG00000086238	2	168931953	168935915
9430093N23Rik	ENSMUSG00000085369	2	169060491	169063270
Gm14250	ENSMUSG00000086840	2	169214581	169221024
4930529I22Rik	ENSMUSG00000085350	2	169224645	169230950
Gm14249	ENSMUSG00000087074	2	169306117	169330343
Gm14236	ENSMUSG00000086411	2	167836029	167837006
Gm14235	ENSMUSG00000085267	2	167973517	167979033
E130018N17Rik	ENSMUSG00000087648	2	167978103	167980013
RP23-391M18.7	ENSMUSG00000093752	2	168006486	168055864
Mocs3	ENSMUSG00000091642	2	168055928	168057613
Gm14237	ENSMUSG00000083342	2	168067501	168067930
AL831766.1	ENSMUSG00000092849	2	167890320	167890397
AL844882.1	ENSMUSG00000092801	2	168675512	168675637
BX005039.1	ENSMUSG00000092923	2	168003658	168003752
SNORA17	ENSMUSG00000077761	2	168707540	168707668
AL772258.1	ENSMUSG00000080415	2	168886620	168886740
SNORA2	ENSMUSG00000064961	2	168161200	168161336
Cbln4	ENSMUSG00000067578	2	171861733	171868966
Mc3r	ENSMUSG00000038537	2	172073992	172076614
2010011I20Rik	ENSMUSG00000027495	2	172171065	172181249
Aurka	ENSMUSG00000027496	2	172181690	172196035
Cstf1	ENSMUSG00000027498	2	172196181	172207948
Cass4	ENSMUSG00000074570	2	172219294	172259257
2410001C21Rik	ENSMUSG00000027502	2	172266056	172295408
Gcnt7	ENSMUSG00000074569	2	172275813	172284096
1700029J11Rik	ENSMUSG00000027505	2	172298020	172299831
Tfap2c	ENSMUSG00000028640	2	172375093	172384122
Bmp7	ENSMUSG00000008999	2	172693513	172765822
Spo11	ENSMUSG00000005883	2	172803201	172819077
Rae1	ENSMUSG00000027509	2	172825618	172841240
Rbm38	ENSMUSG00000027510	2	172845999	172860235
Gm14266	ENSMUSG00000084829	2	171018769	171096850
Gm14640	ENSMUSG00000084818	2	171040999	171043447
1700007M16Rik	ENSMUSG00000086613	2	171059509	171064491
1700028P15Rik	ENSMUSG00000086823	2	171782379	171788324
Gm14272	ENSMUSG00000085426	2	171813695	171814695
Gm14641	ENSMUSG00000087100	2	171821441	171829495
Gm14271	ENSMUSG00000087409	2	171872026	171875634
Gm14274	ENSMUSG00000083793	2	171926121	171926735
Gm14275	ENSMUSG00000085949	2	172113633	172116020
Gm14273	ENSMUSG00000085905	2	172149834	172164163
Gm14455	ENSMUSG00000087633	2	172251304	172266060
Gm14303	ENSMUSG00000081344	2	172335021	172335191
Gm20490	ENSMUSG00000092596	2	172848004	172848457
Gm14453	ENSMUSG00000087442	2	172851186	172860081
AL845460.1	ENSMUSG00000093160	2	172689765	172689842
SCARNA13	ENSMUSG00000088505	2	171131668	171131931
Gm14322	ENSMUSG00000078864	2	177493993	177505177
Gm14325	ENSMUSG00000078863	2	177566496	177575041
Gm14327	ENSMUSG00000074521	2	177631801	177640489
C330013J21Rik	ENSMUSG00000074529	2	177638045	177660318
Gm14326	ENSMUSG00000078862	2	177670698	177692002
Etohi1	ENSMUSG00000074519	2	177757989	177768727
Zfp931	ENSMUSG00000078861	2	177802400	177813181
Phactr3	ENSMUSG00000027525	2	177853680	178073197
Sycp2	ENSMUSG00000060445	2	178079998	178142390
Ppp1r3d	ENSMUSG00000049999	2	178145911	178149177
9030418K01Rik	ENSMUSG00000070476	2	178149229	178159133
Cdh26	ENSMUSG00000039155	2	178165236	178222071
4930591A17Rik	ENSMUSG00000039138	2	179149641	179151587
Cdh4	ENSMUSG00000000305	2	179177136	179634078
Gm14314	ENSMUSG00000082215	2	178754824	178755838
Gm14428	ENSMUSG00000083702	2	177715239	177717405
Gm17513	ENSMUSG00000090944	2	177758513	177763441
Gm14292	ENSMUSG00000061897	2	178912130	178912585
Gm14293	ENSMUSG00000081481	2	178975195	178975771
Gm14294	ENSMUSG00000081882	2	179098998	179099748
Gm14300	ENSMUSG00000083410	2	179347327	179348272
Gm14324	ENSMUSG00000080709	2	177469005	177473462
Gm14429	ENSMUSG00000081574	2	177586857	177590208
Gm14323	ENSMUSG00000082901	2	177627343	177627969
Gm15574	ENSMUSG00000081883	3	32778933	32779530
4930419G24Rik	ENSMUSG00000087625	3	32923699	32987529
Kcnmb3	ENSMUSG00000091091	3	32371243	32390891
Kcnmb2	ENSMUSG00000037610	3	31801429	32099102
Zmat3	ENSMUSG00000027663	3	32233718	32264600
4930429B21Rik	ENSMUSG00000049507	3	32264697	32266358
Pik3ca	ENSMUSG00000027665	3	32296593	32367408
Ndufb5	ENSMUSG00000027673	3	32635912	32650488
Usp13	ENSMUSG00000056900	3	32716468	32836993
Pex5l	ENSMUSG00000027674	3	32848553	33042169
Zfp639	ENSMUSG00000027667	3	32414217	32419607
Mfn1	ENSMUSG00000027668	3	32428387	32478161
Gnb4	ENSMUSG00000027669	3	32479254	32515507
Actl6a	ENSMUSG00000027671	3	32607468	32625890
Mrpl47	ENSMUSG00000037531	3	32624319	32636069
Ttc14	ENSMUSG00000027677	3	33698877	33713782
Ccdc39	ENSMUSG00000027676	3	33711284	33743232
U4	ENSMUSG00000084665	3	32910880	32911036
SNORA48	ENSMUSG00000088260	3	33291979	33292121
Gm10704	ENSMUSG00000074479	3	88380329	88381063
Gm17146	ENSMUSG00000091881	3	88526012	88526592
5830417I10Rik	ENSMUSG00000078684	3	88579138	88630250
Gm16069	ENSMUSG00000086718	3	88984677	88986215
Gm15998	ENSMUSG00000086389	3	89119361	89122829
Gm10702	ENSMUSG00000074467	3	89157551	89158820
Gm15417	ENSMUSG00000074466	3	89195772	89202701
Mtx1	ENSMUSG00000064068	3	89013003	89031010
Ash1l	ENSMUSG00000028053	3	88769734	88883295
Lmna	ENSMUSG00000028063	3	88285070	88313878
Tmem79	ENSMUSG00000001420	3	88132577	88138426
Rhbg	ENSMUSG00000001417	3	88046796	88091132
Prcc	ENSMUSG00000004895	3	87662822	87689530
Msto1	ENSMUSG00000068922	3	88709029	88717921
Smg5	ENSMUSG00000001415	3	88140182	88166259
Paqr6	ENSMUSG00000041423	3	88168506	88172463
Bglap-rs1	ENSMUSG00000074489	3	88172538	88176665
Bglap2	ENSMUSG00000074486	3	88181658	88182621
Gm6821	ENSMUSG00000078691	3	88184926	88186733
Bglap	ENSMUSG00000074483	3	88187423	88188386
Pmf1	ENSMUSG00000028066	3	88198061	88214238
Slc25a44	ENSMUSG00000050144	3	88214420	88229061
Sema4a	ENSMUSG00000028064	3	88239881	88265104
Hdgf	ENSMUSG00000004897	3	87710243	87720054
Mrpl24	ENSMUSG00000019710	3	87723428	87727594
Rrnad1	ENSMUSG00000004896	3	87726523	87734639
Isg20l2	ENSMUSG00000048039	3	87734236	87744608
Crabp2	ENSMUSG00000004885	3	87752588	87757298
Nes	ENSMUSG00000004891	3	87775000	87784373
Bcan	ENSMUSG00000004892	3	87791453	87804278
Hapln2	ENSMUSG00000004894	3	87825672	87831505
Gpatch4	ENSMUSG00000028069	3	87847030	87859915
Apoa1bp	ENSMUSG00000028070	3	87860445	87862417
Ttc24	ENSMUSG00000051036	3	87873332	87882226
Iqgap3	ENSMUSG00000028068	3	87885973	87924970
Mef2d	ENSMUSG00000001419	3	87946294	87976008
Thbs3	ENSMUSG00000028047	3	89019102	89030759
Muc1	ENSMUSG00000042784	3	89032979	89037303
Trim46	ENSMUSG00000042766	3	89038099	89050231
Krtcap2	ENSMUSG00000042747	3	89049888	89053644
Dpm3	ENSMUSG00000042737	3	89063280	89071001
Slc50a1	ENSMUSG00000027953	3	89072168	89074492
Efna1	ENSMUSG00000027954	3	89075655	89085064
Efna3	ENSMUSG00000028039	3	89117821	89126887
Efna4	ENSMUSG00000028040	3	89137312	89141950
Adam15	ENSMUSG00000028041	3	89142464	89153932
Fam189b	ENSMUSG00000032657	3	88987065	88993217
Gba	ENSMUSG00000028048	3	89006850	89012603
Dap3	ENSMUSG00000068921	3	88724725	88755103
Chrnb2	ENSMUSG00000027950	3	89557370	89568554
Gm17285	ENSMUSG00000090826	3	88081022	88081376
1700021C14Rik	ENSMUSG00000010538	3	88084043	88100921
Cct3	ENSMUSG00000001416	3	88101038	88125689
0610031J06Rik	ENSMUSG00000001418	3	88128945	88135235
Rusc1	ENSMUSG00000041263	3	88887903	88897285
Fdps	ENSMUSG00000059743	3	88897514	88905881
Pklr	ENSMUSG00000041237	3	88940064	88950706
Hcn3	ENSMUSG00000028051	3	88949996	88964118
Clk2	ENSMUSG00000068917	3	88968717	88980843
4632404H12Rik	ENSMUSG00000042579	3	89571433	89577162
Ube2q1	ENSMUSG00000042572	3	89577531	89587919
She	ENSMUSG00000046280	3	89635292	89662756
Sh2d2a	ENSMUSG00000028071	3	87650677	87659644
Mex3a	ENSMUSG00000074480	3	88336317	88345318
Rab25	ENSMUSG00000008601	3	88345951	88352222
Lamtor2	ENSMUSG00000028062	3	88353741	88356996
Ubqln4	ENSMUSG00000008604	3	88357638	88373647
Ssr2	ENSMUSG00000041355	3	88383593	88392319
Arhgef2	ENSMUSG00000028059	3	88411376	88451974
RP23-398K14.3	ENSMUSG00000093390	3	88420379	88424983
Rxfp4	ENSMUSG00000049741	3	88455820	88457064
2810403A07Rik	ENSMUSG00000028060	3	88489716	88516855
Dcst1	ENSMUSG00000042672	3	89154141	89169175
Zbtb7b	ENSMUSG00000028042	3	89181566	89198698
Lenep	ENSMUSG00000078173	3	89204910	89206715
Flad1	ENSMUSG00000042642	3	89204926	89215792
Cks1b	ENSMUSG00000028044	3	89219394	89222305
Shc1	ENSMUSG00000042626	3	89222365	89233937
Pygo2	ENSMUSG00000047824	3	89234136	89239050
Pbxip1	ENSMUSG00000042613	3	89240628	89254874
Pmvk	ENSMUSG00000027952	3	89263040	89272935
Kcnn3	ENSMUSG00000000794	3	89324086	89471683
Adar	ENSMUSG00000027951	3	89518944	89557368
Scamp3	ENSMUSG00000028049	3	88981395	88986687
1700113A16Rik	ENSMUSG00000086082	3	87975482	87981707
AW047730	ENSMUSG00000091886	3	88004545	88007403
Gm3764	ENSMUSG00000091070	3	88018407	88025782
Rit1	ENSMUSG00000028057	3	88520760	88534971
Gm10253	ENSMUSG00000068924	3	88542675	88543614
Syt11	ENSMUSG00000068923	3	88548622	88636219
Gon4l	ENSMUSG00000054199	3	88639153	88772903
4731419I09Rik	ENSMUSG00000091513	3	89141772	89151753
Mir720	ENSMUSG00000076048	3	88920531	88920594
SNORA17	ENSMUSG00000077804	3	88852920	88853049
U6	ENSMUSG00000065023	3	89005089	89005195
Mir3093	ENSMUSG00000092988	3	88019093	88019179
Mir1905	ENSMUSG00000084728	3	88340223	88340304
SCARNA15	ENSMUSG00000088604	3	88497853	88497979
U6	ENSMUSG00000077148	3	88901832	88901935
SNORA42	ENSMUSG00000084433	3	88511080	88511214
U1	ENSMUSG00000064738	3	88666841	88667002
n-R5s197	ENSMUSG00000065236	3	88710432	88710550
Mir92b	ENSMUSG00000076255	3	89031038	89031120
AC132327.1	ENSMUSG00000093093	3	89106404	89106651
U6	ENSMUSG00000065786	3	88774545	88774651
AC044864.1	ENSMUSG00000092876	3	88019511	88019618
Rps10-ps1	ENSMUSG00000060438	3	95426200	95426720
Gm15444	ENSMUSG00000086556	3	96013550	96024091
RP24-201C14.5	ENSMUSG00000093577	3	96043316	96045742
RP24-201C14.6	ENSMUSG00000093553	3	96047473	96050303
Hist2h3c1	ENSMUSG00000070392	3	96049477	96052432
RP24-201C14.11	ENSMUSG00000093507	3	96058542	96060200
RP24-201C14.10	ENSMUSG00000093656	3	96070998	96074212
Gm15441	ENSMUSG00000074398	3	96359688	96370724
6330549D23Rik	ENSMUSG00000045327	3	96410582	96433743
4930442L01Rik	ENSMUSG00000087223	3	96635261	96636019
Gpr89	ENSMUSG00000028096	3	96672204	96709269
Polr3gl	ENSMUSG00000028104	3	96381795	96398104
Gm16253	ENSMUSG00000087610	3	96380907	96384586
Hfe2	ENSMUSG00000038403	3	96329108	96333139
Hist2h2bb	ENSMUSG00000050936	3	96073644	96082924
Hist2h2ac	ENSMUSG00000068855	3	96024284	96024803
Hist2h2ab	ENSMUSG00000063689	3	96023788	96024231
Bola1	ENSMUSG00000015943	3	96000511	96023632
Tars2	ENSMUSG00000028107	3	95543899	95558900
4930477E14Rik	ENSMUSG00000091033	3	96205073	96205937
Itga10	ENSMUSG00000090210	3	96449507	96468442
Gm17608	ENSMUSG00000079160	3	97088831	97101701
Mrps21	ENSMUSG00000054312	3	95666557	95675442
Gm16884	ENSMUSG00000087673	3	95659889	95665408
Gm17690	ENSMUSG00000091244	3	95971387	95976337
Gm17667	ENSMUSG00000091691	3	96152550	96161017
Gm17580	ENSMUSG00000092127	3	96153850	96162403
Gm17575	ENSMUSG00000091380	3	96179569	96192787
Gm17587	ENSMUSG00000090993	3	96180956	96189446
C920021L13Rik	ENSMUSG00000080727	3	95675445	95693016
Gm129	ENSMUSG00000038550	3	95682426	95686174
Plekho1	ENSMUSG00000015745	3	95792352	95799924
Vps45	ENSMUSG00000015747	3	95803755	95862389
Otud7b	ENSMUSG00000038495	3	95908450	95965052
Ankrd34a	ENSMUSG00000049097	3	96400559	96403698
Lix1l	ENSMUSG00000049288	3	96405056	96429275
Rbm8a	ENSMUSG00000038374	3	96433851	96437702
Pex11b	ENSMUSG00000028102	3	96439299	96457024
BC107364	ENSMUSG00000046317	3	96237711	96256229
Rprd2	ENSMUSG00000028106	3	95563796	95622876
Prpf3	ENSMUSG00000015748	3	95634047	95659808
Gja5	ENSMUSG00000057123	3	96708616	96881339
Gja8	ENSMUSG00000049908	3	96722786	96729943
Acp6	ENSMUSG00000028093	3	96962700	96980497
Bcl9	ENSMUSG00000038256	3	97007585	97032769
Olfr1402	ENSMUSG00000051392	3	97214140	97215102
Hist2h2be	ENSMUSG00000068854	3	96025044	96027661
Hist2h3c2	ENSMUSG00000081058	3	96042040	96043050
Hist2h2aa2	ENSMUSG00000064220	3	96043639	96044216
Hist2h2aa1	ENSMUSG00000063954	3	96049461	96050038
Hist2h3c1	ENSMUSG00000093769	3	96050608	96052427
Hist2h4	ENSMUSG00000091405	3	96065627	96067234
Hist2h3b	ENSMUSG00000074403	3	96072577	96073064
Rpl21-ps11	ENSMUSG00000060899	3	96470438	96470905
Ankrd35	ENSMUSG00000038354	3	96474054	96494932
Pias3	ENSMUSG00000028101	3	96500307	96509993
Nudt17	ENSMUSG00000028100	3	96509815	96512483
Polr3c	ENSMUSG00000028099	3	96515413	96531551
Rnf115	ENSMUSG00000028098	3	96531534	96595078
Cd160	ENSMUSG00000038304	3	96602686	96633274
Pdzk1	ENSMUSG00000038298	3	96633207	96674849
Fcgr1	ENSMUSG00000015947	3	96086832	96098179
Anp32e	ENSMUSG00000015749	3	95733169	95751313
BC028528	ENSMUSG00000038543	3	95687877	95695928
Aph1a	ENSMUSG00000015750	3	95697892	95702211
Txnip	ENSMUSG00000038393	3	96361880	96365806
Ctss	ENSMUSG00000038642	3	95330708	95360325
Hormad1	ENSMUSG00000028109	3	95363599	95391593
Golph3l	ENSMUSG00000046519	3	95392856	95423164
Ensa	ENSMUSG00000038619	3	95428902	95436024
Mcl1	ENSMUSG00000038612	3	95462643	95467099
Adamtsl4	ENSMUSG00000015850	3	95480124	95491840
Ecm1	ENSMUSG00000028108	3	95538070	95543492
Car14	ENSMUSG00000038526	3	95701691	95708614
Mtmr11	ENSMUSG00000045934	3	95965927	95975641
Sf3b4	ENSMUSG00000068856	3	95976255	95981487
Sv2a	ENSMUSG00000038486	3	95985074	95999444
U1	ENSMUSG00000065020	3	96226656	96226820
U1	ENSMUSG00000065773	3	96263947	96264112
U1	ENSMUSG00000064447	3	96292652	96292816
U1	ENSMUSG00000065294	3	96254369	96254534
SNORA5	ENSMUSG00000065669	3	96528188	96528323
U1	ENSMUSG00000064817	3	96290478	96290642
U1	ENSMUSG00000075728	3	96177944	96178108
Telomerase-vert	ENSMUSG00000064796	3	96218360	96218782
U1	ENSMUSG00000089493	3	95600622	95600807
SNORA19	ENSMUSG00000084686	3	95980284	95980410
U1	ENSMUSG00000075978	3	96132348	96132513
U6	ENSMUSG00000088511	3	96944475	96944584
U1	ENSMUSG00000065308	3	96163876	96164040
Gm15999	ENSMUSG00000086557	3	97696154	97705012
Gm5544	ENSMUSG00000074388	3	97734096	97770941
Fmo5	ENSMUSG00000028088	3	97432727	97459205
Prkab2	ENSMUSG00000038205	3	97462116	97477735
Gm17651	ENSMUSG00000090441	3	97477641	97478617
Pde4dip	ENSMUSG00000038170	3	97493747	97692630
Sec22b	ENSMUSG00000027879	3	97705113	97727199
Chd1l	ENSMUSG00000028089	3	97364665	97414126
Notch2	ENSMUSG00000027878	3	97817461	97954290
Adam30	ENSMUSG00000043468	3	97964735	97967096
Reg4	ENSMUSG00000027876	3	98026079	98040671
Hmgcs2	ENSMUSG00000027875	3	98084358	98114661
Phgdh	ENSMUSG00000053398	3	98117093	98143913
Zfp697	ENSMUSG00000050064	3	98186404	98235871
Gm4450	ENSMUSG00000090817	3	98249609	98260954
Hsd3b4	ENSMUSG00000056351	3	98302998	98313958
Gm10681	ENSMUSG00000074380	3	98356476	98367961
Rtcd1	ENSMUSG00000000339	3	116191881	116211126
Dbt	ENSMUSG00000000340	3	116215988	116252894
Lrrc39	ENSMUSG00000027961	3	116265891	116286052
Ccdc76	ENSMUSG00000033439	3	116284011	116317505
Sass6	ENSMUSG00000027959	3	116297926	116333902
Hiat1	ENSMUSG00000089911	3	116334082	116384178
Slc35a3	ENSMUSG00000027957	3	116372387	116415749
Agl	ENSMUSG00000033400	3	116442917	116511084
Frrs1	ENSMUSG00000033386	3	116581145	116606668
Palmd	ENSMUSG00000033377	3	116621174	116671905
4930455H04Rik	ENSMUSG00000080907	3	116671185	116687324
1700061I17Rik	ENSMUSG00000028009	3	116763440	116780683
D3Bwg0562e	ENSMUSG00000044667	3	117022063	117063794
4833424O15Rik	ENSMUSG00000033342	3	117278145	117392425
Snx7	ENSMUSG00000028007	3	117484415	117571854
Gm4596	ENSMUSG00000082394	3	116231055	116231496
Gm9761	ENSMUSG00000034437	3	116264003	116264344
Gm17632	ENSMUSG00000090721	3	116191884	116196276
AC165162.1	ENSMUSG00000092666	3	117025859	117025923
AC122183.1	ENSMUSG00000093000	3	118137639	118137748
SNORA17	ENSMUSG00000088840	3	116169537	116169633
U1	ENSMUSG00000089060	3	116151307	116151482
AC115933.1	ENSMUSG00000093054	3	117551471	117551570
Mir137	ENSMUSG00000065569	3	118136761	118136862
Znhit6	ENSMUSG00000074182	3	145239172	145268209
Cyr61	ENSMUSG00000028195	3	145309935	145312949
Ddah1	ENSMUSG00000028194	3	145421639	145557241
Bcl10	ENSMUSG00000028191	3	145587322	145597247
2410004B18Rik	ENSMUSG00000036873	3	145600978	145607793
Syde2	ENSMUSG00000036863	3	145650834	145684684
Wdr63	ENSMUSG00000043020	3	145703490	145771094
Mcoln3	ENSMUSG00000036853	3	145780423	145804770
Mcoln2	ENSMUSG00000011008	3	145812797	145858477
Lpar3	ENSMUSG00000036832	3	145883925	145949178
Ssx2ip	ENSMUSG00000036825	3	146067606	146103103
Dnase2b	ENSMUSG00000028185	3	146067777	146259576
Ctbs	ENSMUSG00000028189	3	146113434	146128813
Spata1	ENSMUSG00000028188	3	146120167	146162717
Gng5	ENSMUSG00000068523	3	146162798	146168536
Rpf1	ENSMUSG00000028187	3	146169312	146184387
Uox	ENSMUSG00000028186	3	146260041	146295269
4930503B20Rik	ENSMUSG00000090202	3	146308157	146314281
Samd13	ENSMUSG00000048652	3	146308159	146348556
Prkacb	ENSMUSG00000005034	3	146392543	146475924
Gm10288	ENSMUSG00000070343	3	146501775	146502311
Ttll7	ENSMUSG00000036745	3	146515331	146646973
Gm16325	ENSMUSG00000085810	3	146304896	146314679
Gm17501	ENSMUSG00000090771	3	145313276	145315057
U1	ENSMUSG00000065937	3	145779066	145779218
U6	ENSMUSG00000088218	3	146050706	146050808
AC124987.1	ENSMUSG00000077892	3	146062098	146062181
Nexn	ENSMUSG00000039103	3	151899950	151929284
Fam73a	ENSMUSG00000054942	3	151936423	152003371
Usp33	ENSMUSG00000025437	3	152009442	152056576
Zzz3	ENSMUSG00000039068	3	152058437	152125790
Ak5	ENSMUSG00000039058	3	152125779	152331104
Pigk	ENSMUSG00000039047	3	152377064	152643372
St6galnac5	ENSMUSG00000039037	3	152480045	152645210
St6galnac3	ENSMUSG00000052544	3	152868369	153388026
5730460C07Rik	ENSMUSG00000062046	3	153452269	153455051
Asb17	ENSMUSG00000038997	3	153507173	153518046
Msh4	ENSMUSG00000005493	3	153520111	153569102
Rabggtb	ENSMUSG00000038975	3	153570253	153575930
Acadm	ENSMUSG00000062908	3	153585321	153607596
Slc44a5	ENSMUSG00000028360	3	153636400	153934686
Rpl29-ps1	ENSMUSG00000090095	3	152443738	152445025
Gm16232	ENSMUSG00000090040	3	152539015	152539181
Gm16213	ENSMUSG00000090017	3	152583204	152584363
Gm16231	ENSMUSG00000090163	3	152606277	152606908
Gm10042	ENSMUSG00000058508	3	153448017	153448098
2510003D18Rik	ENSMUSG00000086438	3	153513337	153515388
Gm3076	ENSMUSG00000090114	3	153795304	153795754
AI115009	ENSMUSG00000085901	3	152329877	152344396
SNORA17	ENSMUSG00000088764	3	153527771	153527895
Snord45c	ENSMUSG00000065463	3	153575089	153575168
Snord45b	ENSMUSG00000064731	3	153573527	153573597
AC087184.1	ENSMUSG00000093463	3	153557665	153557735
SNORA17	ENSMUSG00000089237	3	153371875	153371990
SNORD45	ENSMUSG00000065738	3	153574574	153574654
SNORA17	ENSMUSG00000077174	3	153494134	153494256
7SK	ENSMUSG00000089376	3	153284666	153284933
Actl7b	ENSMUSG00000070980	4	56752879	56754297
Actl7a	ENSMUSG00000070979	4	56756294	56757797
Ikbkap	ENSMUSG00000028431	4	56762552	56815203
BC026590	ENSMUSG00000038827	4	56815217	56822473
Ctnnal1	ENSMUSG00000038816	4	56823807	56878060
D730040F13Rik	ENSMUSG00000055296	4	56879795	56960309
6430704M03Rik	ENSMUSG00000045589	4	56970045	57003263
Epb4.1l4b	ENSMUSG00000028434	4	57004844	57156309
Ptpn3	ENSMUSG00000038764	4	57203713	57314709
Palm2	ENSMUSG00000090053	4	57447119	57724888
Gm20459	ENSMUSG00000089945	4	57581051	57909854
Akap2	ENSMUSG00000038729	4	57730529	57909854
D630039A03Rik	ENSMUSG00000052117	4	57921355	57929169
Txn1	ENSMUSG00000028367	4	57956245	57969283
Txndc8	ENSMUSG00000038709	4	57996899	58021996
Svep1	ENSMUSG00000028369	4	58055314	58219731
Musk	ENSMUSG00000057280	4	58298834	58390290
Lpar1	ENSMUSG00000038668	4	58448127	58566770
Gm12530	ENSMUSG00000085967	4	57184943	57189426
Gm12536	ENSMUSG00000085654	4	57312968	57320177
1700042G15Rik	ENSMUSG00000087044	4	57373740	57377164
Gm12537	ENSMUSG00000078696	4	57383645	57384897
Gm12538	ENSMUSG00000081540	4	57426583	57427068
Gm12539	ENSMUSG00000081615	4	57468433	57470421
Gm12526	ENSMUSG00000073846	4	57770611	57776773
Gm12577	ENSMUSG00000083834	4	58496124	58496697
Gm12578	ENSMUSG00000081186	4	58602636	58603052
Gm12579	ENSMUSG00000083145	4	58623930	58624712
Gm17243	ENSMUSG00000092061	4	58191119	58219507
SNORA44	ENSMUSG00000064595	4	56926514	56926639
SNORA42	ENSMUSG00000080370	4	56774794	56774913
Mir3095	ENSMUSG00000093293	4	58453884	58453970
SNORA43	ENSMUSG00000077170	4	56910498	56910629
SNORA17	ENSMUSG00000077663	4	56691776	56691907
U6	ENSMUSG00000089286	4	57775479	57775582
Mir32	ENSMUSG00000065544	4	56908101	56908170
U6	ENSMUSG00000064752	4	57890261	57890367
BX470220.1	ENSMUSG00000092886	4	56968294	56968363
Olfr267	ENSMUSG00000043385	4	58797651	58798594
AI314180	ENSMUSG00000050812	4	58811783	58925621
Gm12580	ENSMUSG00000086470	4	58661264	58671464
Zkscan16	ENSMUSG00000038630	4	58956500	58971227
Ptgr1	ENSMUSG00000028378	4	58978311	58999991
Dnajc25	ENSMUSG00000070972	4	59007934	59038445
Gm20503	ENSMUSG00000092345	4	59016082	59054760
Gng10	ENSMUSG00000038607	4	59047960	59054775
AI481877	ENSMUSG00000038598	4	59056625	59151855
AL805972.1	ENSMUSG00000092753	4	58950897	58950981
Gm12593	ENSMUSG00000081432	4	59103059	59103801
Gm12594	ENSMUSG00000086660	4	59147940	59150326
Rpsa-ps11	ENSMUSG00000082978	4	59175140	59176028
Ugcg	ENSMUSG00000028381	4	59202129	59235705
Gm12596	ENSMUSG00000086952	4	59272923	59276141
Susd1	ENSMUSG00000038578	4	59327555	59451505
Gm11237	ENSMUSG00000066136	4	73268913	73288075
Gm11236	ENSMUSG00000073819	4	73284035	73288075
Gm11238	ENSMUSG00000073818	4	73299134	73303177
Gm11239	ENSMUSG00000073817	4	73314258	73318301
Gm428	ENSMUSG00000070946	4	73329420	73333462
Rasef	ENSMUSG00000043003	4	73360483	73436613
Gm11758	ENSMUSG00000078663	4	73518123	73522170
Gm11757	ENSMUSG00000078662	4	73532970	73537016
Gm13871	ENSMUSG00000078661	4	73547811	73551857
Gm11756	ENSMUSG00000078660	4	73562632	73566664
2310002L09Rik	ENSMUSG00000028396	4	73585275	73596750
Frmd3	ENSMUSG00000049122	4	73659338	73848118
Kdm4c	ENSMUSG00000028397	4	73888401	74051764
3110001D03Rik	ENSMUSG00000028398	4	74923258	74924209
Gm11240	ENSMUSG00000085034	4	73437150	73444276
Gm13867	ENSMUSG00000083530	4	73510301	73510996
Gm11760	ENSMUSG00000081048	4	73690292	73691087
Gm11405	ENSMUSG00000083767	4	73874101	73875656
A230083N12Rik	ENSMUSG00000085482	4	73896228	73897618
Gm11254	ENSMUSG00000081438	4	74309587	74310239
Gm11258	ENSMUSG00000083659	4	74334011	74335228
Gm11253	ENSMUSG00000082533	4	74727404	74727604
Gm11257	ENSMUSG00000084311	4	74774616	74774930
Gm12912	ENSMUSG00000081067	4	74793513	74794893
Gm11255	ENSMUSG00000083224	4	74970405	74971584
Gm11259	ENSMUSG00000084026	4	75026664	75027378
SNORA63	ENSMUSG00000065884	4	74926530	74926659
SNORA17	ENSMUSG00000077496	4	74281123	74281254
Gm11256	ENSMUSG00000084253	4	75500422	75501250
Gm11241	ENSMUSG00000081844	4	75548164	75549059
Ptprd	ENSMUSG00000028399	4	75587142	77857865
Adamtsl1	ENSMUSG00000066113	4	85699819	86074289
Fam154a	ENSMUSG00000028492	4	86090545	86204232
Rraga	ENSMUSG00000070934	4	86221577	86223185
Haus6	ENSMUSG00000038047	4	86224759	86257959
Plin2	ENSMUSG00000028494	4	86294290	86315964
Dennd4c	ENSMUSG00000038024	4	86394459	86496507
Rps6	ENSMUSG00000028495	4	86500564	86503316
Acer2	ENSMUSG00000038007	4	86520300	86580726
Acer2	ENSMUSG00000091609	4	86576595	86580724
Slc24a2	ENSMUSG00000037996	4	86629028	86876381
Mllt3	ENSMUSG00000028496	4	87415829	87679268
BC057079	ENSMUSG00000038368	4	87740533	88056915
Gm12550	ENSMUSG00000083272	4	86087917	86088245
4930457A20Rik	ENSMUSG00000085108	4	86204350	86205708
Gm12551	ENSMUSG00000081169	4	86272979	86277155
Gm12630	ENSMUSG00000082969	4	86463698	86464481
Gm12600	ENSMUSG00000086512	4	86944266	86947174
Gm12604	ENSMUSG00000082443	4	87226693	87227464
Gm12631	ENSMUSG00000084809	4	87679405	87680902
Gm12646	ENSMUSG00000081530	4	87689708	87689945
U6	ENSMUSG00000077597	4	86155056	86155129
Mir491	ENSMUSG00000070077	4	87767944	87768029
AL806517.1	ENSMUSG00000093065	4	87078176	87078240
Scarna8	ENSMUSG00000088958	4	86232357	86232487
Ptplad2	ENSMUSG00000028497	4	88042048	88084832
Ifnb1	ENSMUSG00000048806	4	88167929	88168698
Gm12597	ENSMUSG00000073812	4	88203577	88204149
Ifna14	ENSMUSG00000089770	4	88217133	88217702
Ifna9	ENSMUSG00000078644	4	88237717	88238289
Ifna12	ENSMUSG00000073811	4	88248484	88249280
C87499	ENSMUSG00000038330	4	88273224	88280315
Ifna13	ENSMUSG00000063376	4	88289545	88290363
Gm13280	ENSMUSG00000078355	4	88321819	88322828
Ifna2	ENSMUSG00000078354	4	88328785	88329816
Ifnab	ENSMUSG00000078353	4	88336503	88337172
Klhl9	ENSMUSG00000070923	4	88364196	88368369
Gm13271	ENSMUSG00000079860	4	88400772	88401320
Gm16686	ENSMUSG00000085473	4	88401099	88401494
Gm13283	ENSMUSG00000078642	4	88405933	88417772
Gm13290	ENSMUSG00000091634	4	88419152	88420707
Gm13289	ENSMUSG00000090575	4	88422080	88423635
Gm13272	ENSMUSG00000092000	4	88425008	88426563
Ifnz	ENSMUSG00000073810	4	88428035	88429496
Gm13276	ENSMUSG00000091108	4	88430867	88432422
Gm13277	ENSMUSG00000090757	4	88433791	88435346
Gm13278	ENSMUSG00000090392	4	88436709	88438264
Gm13275	ENSMUSG00000079859	4	88440391	88440939
Gm13279	ENSMUSG00000091566	4	88442556	88444111
Gm13285	ENSMUSG00000091353	4	88445479	88447034
Gm13287	ENSMUSG00000061396	4	88448998	88449965
Gm13288	ENSMUSG00000070908	4	88451435	88454284
Ifna7	ENSMUSG00000070907	4	88462129	88462704
Ifna11	ENSMUSG00000070906	4	88465823	88466469
Ifna6	ENSMUSG00000078641	4	88473320	88473889
Ifna5	ENSMUSG00000076440	4	88481429	88481998
Ifna4	ENSMUSG00000070904	4	88487720	88488363
Ifna1	ENSMUSG00000070903	4	88495991	88496560
4930553M12Rik	ENSMUSG00000054351	4	88513786	88514283
Ifne	ENSMUSG00000045364	4	88525442	88526105
Mtap	ENSMUSG00000062937	4	88783026	88826985
Gm12645	ENSMUSG00000082597	4	87797600	87797874
Gm12652	ENSMUSG00000081818	4	87901818	87902155
Ifna-ps1	ENSMUSG00000080964	4	88224791	88226478
Mrpl48-ps	ENSMUSG00000078480	4	88245079	88245714
Gm12601	ENSMUSG00000083958	4	88258557	88259948
Gm13281	ENSMUSG00000081784	4	88294642	88295208
Gm13273	ENSMUSG00000081893	4	88342095	88342602
Gm13282	ENSMUSG00000084192	4	88353813	88354357
Gm13274	ENSMUSG00000086074	4	88384742	88390198
Gm13286	ENSMUSG00000081501	4	88403748	88404284
Gm10583	ENSMUSG00000073809	4	88404075	88404474
Gm10582	ENSMUSG00000073808	4	88407005	88407404
Gm13284	ENSMUSG00000082789	4	88409613	88417510
Gm10581	ENSMUSG00000073807	4	88417454	88417688
Gm10580	ENSMUSG00000073806	4	88420225	88420624
Gm12603	ENSMUSG00000085183	4	88696212	88730518
Gm12602	ENSMUSG00000085569	4	88746568	88774130
Gm12607	ENSMUSG00000083989	4	88807603	88808095
Gm17476	ENSMUSG00000090834	4	88430359	88440295
Gm17612	ENSMUSG00000091535	4	88442047	88446128
Mir31	ENSMUSG00000065408	4	88556461	88556566
SNORA17	ENSMUSG00000088504	4	88828885	88829024
Gm12605	ENSMUSG00000083881	4	88862768	88863720
Gm12606	ENSMUSG00000087659	4	88881603	88919307
Cdkn2a	ENSMUSG00000044303	4	88920377	88940557
Cdkn2b	ENSMUSG00000073802	4	88952198	88956941
Gm12609	ENSMUSG00000085147	4	89048648	89066571
Dmrta1	ENSMUSG00000043753	4	89346127	89361463
Gm12610	ENSMUSG00000086035	4	89088539	89130178
Gm12608	ENSMUSG00000080808	4	89108908	89111335
Zfp352	ENSMUSG00000070902	4	89885511	89892393
Gm12629	ENSMUSG00000085690	4	89852218	89856700
Gm12633	ENSMUSG00000080756	4	90026313	90028017
Gm12634	ENSMUSG00000082569	4	90035422	90036413
Gm12635	ENSMUSG00000081563	4	90119565	90120316
Gm12636	ENSMUSG00000082502	4	90210438	90211061
Gm12632	ENSMUSG00000082622	4	90523574	90524068
SNORA17	ENSMUSG00000077589	4	90664553	90664684
Gm12643	ENSMUSG00000079962	4	90704591	90704964
Gm12644	ENSMUSG00000081876	4	90823373	90823978
Dock7	ENSMUSG00000028556	4	98603356	98787606
Atg4c	ENSMUSG00000028550	4	98860625	98926478
Gm10305	ENSMUSG00000070892	4	98939362	98941836
Gm12689	ENSMUSG00000070891	4	98962591	98963382
Foxd3	ENSMUSG00000067261	4	99322990	99325362
Alg6	ENSMUSG00000073792	4	99382355	99430151
Itgb3bp	ENSMUSG00000028549	4	99432093	99602418
Gm10967	ENSMUSG00000078631	4	99439047	99441197
Efcab7	ENSMUSG00000073791	4	99495889	99585393
Pgm2	ENSMUSG00000025791	4	99602019	99659899
Ror1	ENSMUSG00000035305	4	99768396	100117370
Ube2u	ENSMUSG00000069733	4	100151465	100222752
Cachd1	ENSMUSG00000028532	4	100449280	100701825
Gm10577	ENSMUSG00000073789	4	100692903	100693301
Gm10576	ENSMUSG00000073788	4	100727163	100727867
Gm12852	ENSMUSG00000081733	4	98769751	98770469
Gm12705	ENSMUSG00000087395	4	98783105	98784992
Gm12681	ENSMUSG00000086498	4	98813605	98828333
Gm12685	ENSMUSG00000081184	4	99085189	99085402
Gm12686	ENSMUSG00000082442	4	99085464	99085860
Gm12684	ENSMUSG00000081150	4	99096947	99097945
Gm12683	ENSMUSG00000080803	4	99186743	99187157
Gm12690	ENSMUSG00000087332	4	99236191	99239702
Gm12687	ENSMUSG00000083698	4	99282508	99283213
Gm12688	ENSMUSG00000086096	4	99320298	99321674
Gm12682	ENSMUSG00000086592	4	99329232	99379663
Gm12702	ENSMUSG00000085142	4	99725125	99738589
Gm12701	ENSMUSG00000086385	4	99792226	99793446
Gm12706	ENSMUSG00000080967	4	100033967	100034664
Gm12698	ENSMUSG00000085871	4	100195852	100200406
Gm12699	ENSMUSG00000081553	4	100239713	100240653
Gm12700	ENSMUSG00000082601	4	100253883	100254339
U4	ENSMUSG00000084478	4	99582402	99582483
BX005053.1	ENSMUSG00000092763	4	99324433	99324521
Raver2	ENSMUSG00000035275	4	100741588	100824975
Jak1	ENSMUSG00000028530	4	100824972	100937887
Ak4	ENSMUSG00000028527	4	101091882	101140376
Dnajc6	ENSMUSG00000028528	4	101169253	101315404
Leprot	ENSMUSG00000035212	4	101320323	101331969
Gm12785	ENSMUSG00000082928	4	100883021	100883192
Gm12801	ENSMUSG00000085863	4	100956826	100957808
Gm12796	ENSMUSG00000085721	4	100965019	100994350
Gm12793	ENSMUSG00000081621	4	101013962	101014253
E130102H24Rik	ENSMUSG00000086782	4	101019136	101028853
0610043K17Rik	ENSMUSG00000087361	4	101026388	101071786
Gm12795	ENSMUSG00000083614	4	101034782	101035495
Gm12798	ENSMUSG00000084758	4	101075686	101080461
U6	ENSMUSG00000077677	4	100859369	100859472
7SK	ENSMUSG00000089446	4	101227700	101227973
U7	ENSMUSG00000088551	4	100776193	100776255
Mir101a	ENSMUSG00000065451	4	101019550	101019632
U1	ENSMUSG00000065279	4	100943748	100943911
Lepr	ENSMUSG00000057722	4	101390009	101487957
Eif2c3	ENSMUSG00000028842	4	126008948	126106800
Eif2c1	ENSMUSG00000041530	4	126112256	126145827
Eif2c4	ENSMUSG00000042500	4	126166785	126210716
Clspn	ENSMUSG00000042489	4	126234179	126271147
5730409E04Rik	ENSMUSG00000073755	4	126287062	126291615
Psmb2	ENSMUSG00000028837	4	126354874	126386958
Tfap2e	ENSMUSG00000042477	4	126393250	126413484
Ncdn	ENSMUSG00000028833	4	126420994	126430682
AU040320	ENSMUSG00000028830	4	126430788	126547314
Zmym4	ENSMUSG00000042446	4	126539069	126645379
Sfpq	ENSMUSG00000028820	4	126698568	126714257
Zmym1	ENSMUSG00000043872	4	126724338	126738396
Zmym6	ENSMUSG00000042408	4	126754627	126801616
Gm12942	ENSMUSG00000070737	4	126800935	126806888
Dlgap3	ENSMUSG00000042388	4	126846448	126914266
BC003266	ENSMUSG00000042380	4	126921028	126925053
Gja4	ENSMUSG00000050234	4	126988665	126991283
Gjb3	ENSMUSG00000042367	4	127002479	127008088
Gjb4	ENSMUSG00000046623	4	127028330	127031325
Gjb5	ENSMUSG00000042357	4	127032053	127035425
CK137956	ENSMUSG00000028813	4	127604836	127648195
Csmd2	ENSMUSG00000028804	4	127665101	128244903
Hmgb4	ENSMUSG00000048686	4	127937457	127938139
Gm12929	ENSMUSG00000084099	4	126153546	126153915
Gm12928	ENSMUSG00000082381	4	126153971	126154543
Gm12935	ENSMUSG00000083461	4	126198913	126199331
Gm12934	ENSMUSG00000082888	4	126201574	126201916
Gm12936	ENSMUSG00000081319	4	126261753	126262053
Gm12933	ENSMUSG00000081210	4	126342498	126343369
Gm12937	ENSMUSG00000082498	4	126472717	126473659
Gm12939	ENSMUSG00000081609	4	126660683	126660847
Gm12940	ENSMUSG00000085334	4	126710975	126726642
Gm12941	ENSMUSG00000084088	4	126723627	126723846
Gm12944	ENSMUSG00000084149	4	126733506	126733968
Gm12943	ENSMUSG00000082220	4	126818523	126818732
Gm12948	ENSMUSG00000082047	4	126974028	126974709
Gm12947	ENSMUSG00000079998	4	127085623	127086042
4930471C06Rik	ENSMUSG00000086138	4	127152092	127154084
1700080G11Rik	ENSMUSG00000086771	4	127208866	127210129
A630031M04Rik	ENSMUSG00000087470	4	127222345	127247746
1700112K13Rik	ENSMUSG00000087510	4	127487882	127489417
4930465A12Rik	ENSMUSG00000087459	4	127810767	127841503
4930546G22Rik	ENSMUSG00000085717	4	127938288	127940234
U6	ENSMUSG00000088982	4	126785710	126785815
SNORA17	ENSMUSG00000088984	4	126538224	126538356
AL606908.1	ENSMUSG00000092839	4	126508708	126509002
SNORA17	ENSMUSG00000077780	4	126495260	126495389
U6	ENSMUSG00000087987	4	126961975	126962077
Zscan20	ENSMUSG00000061894	4	128260783	128287342
Tlr12	ENSMUSG00000062545	4	128292690	128295863
Phc2	ENSMUSG00000028796	4	128331982	128430125
Gm12958	ENSMUSG00000084891	4	128314715	128315691
A3galt2	ENSMUSG00000028794	4	128432608	128446542
Zfp362	ENSMUSG00000028799	4	128450332	128483289
Trim62	ENSMUSG00000041000	4	128560824	128588572
Adc	ENSMUSG00000028789	4	128607477	128639686
Ak2	ENSMUSG00000028792	4	128669202	128688773
Gm12968	ENSMUSG00000085701	4	128523441	128550942
Gm12969	ENSMUSG00000084011	4	128545637	128546640
Gm15904	ENSMUSG00000085961	4	128613249	128617439
Rnf19b	ENSMUSG00000028793	4	128735515	128763130
1700086P04Rik	ENSMUSG00000085085	4	128727341	128735227
Tmem54	ENSMUSG00000028786	4	128782792	128788870
Hpca	ENSMUSG00000028785	4	128788814	128799280
Fndc5	ENSMUSG00000001334	4	128814243	128821837
S100pbp	ENSMUSG00000040928	4	128825249	128866971
Gm15906	ENSMUSG00000087416	4	128812335	128814154
Yars	ENSMUSG00000028811	4	128867004	128896851
C77080	ENSMUSG00000050390	4	128896822	128938648
snoU13	ENSMUSG00000088921	4	128896701	128896788
Sync	ENSMUSG00000001333	4	128964861	128985803
Gm12976	ENSMUSG00000087575	4	128939209	128942254
AL607123.1	ENSMUSG00000093163	4	128960109	128960190
Rbbp4	ENSMUSG00000057236	4	128984344	129012614
Zbtb8os	ENSMUSG00000057572	4	129012939	129031791
Zbtb8a	ENSMUSG00000028807	4	129030872	129055360
Gm17525	ENSMUSG00000091673	4	128986325	128995687
Gm12980	ENSMUSG00000082468	4	129057088	129057423
Zbtb8b	ENSMUSG00000048485	4	129103009	129118097
Bsdc1	ENSMUSG00000040859	4	129138825	129165742
Tssk3	ENSMUSG00000000411	4	129166258	129168266
1700125D06Rik	ENSMUSG00000078554	4	129168434	129169200
Marcksl1	ENSMUSG00000047945	4	129190825	129193229
Hdac1	ENSMUSG00000028800	4	129193348	129219957
Lck	ENSMUSG00000000409	4	129225588	129250885
Fam167b	ENSMUSG00000050493	4	129254059	129255793
Eif3i	ENSMUSG00000028798	4	129269204	129277892
2510006D16Rik	ENSMUSG00000028797	4	129277912	129301303
Dcdc2b	ENSMUSG00000078552	4	129285773	129291498
Iqcc	ENSMUSG00000040795	4	129292370	129296343
Ccdc28b	ENSMUSG00000028795	4	129296518	129301191
Txlna	ENSMUSG00000053841	4	129303327	129318309
Kpna6	ENSMUSG00000003731	4	129321224	129350011
Tmem39b	ENSMUSG00000053730	4	129353599	129374082
Khdrbs1	ENSMUSG00000028790	4	129380408	129419547
Gm12979	ENSMUSG00000086336	4	129169213	129186990
Gm12965	ENSMUSG00000086797	4	129300855	129301336
U1	ENSMUSG00000064613	4	129135595	129135734
Nop14	ENSMUSG00000036693	5	34981181	35002797
Grk4	ENSMUSG00000052783	5	35003028	35097954
Htt	ENSMUSG00000029104	5	35104389	35255183
A930005I04Rik	ENSMUSG00000051246	5	35258564	35266488
Rgs12	ENSMUSG00000029101	5	35292094	35382293
Hgfac	ENSMUSG00000029102	5	35384202	35391085
Dok7	ENSMUSG00000044716	5	35399462	35430488
Lrpap1	ENSMUSG00000029103	5	35434139	35448415
Adra2c	ENSMUSG00000045318	5	35621215	35624410
E130018O15Rik	ENSMUSG00000055944	5	35721801	35731125
Hmx1	ENSMUSG00000067438	5	35731507	35742379
Cpz	ENSMUSG00000036596	5	35844864	35868347
2310079F23Rik	ENSMUSG00000029097	5	35899855	35917719
Acox3	ENSMUSG00000029098	5	35925689	35958001
Htra3	ENSMUSG00000029096	5	35994682	36022431
Sh3tc1	ENSMUSG00000036553	5	36039829	36071925
Ablim2	ENSMUSG00000029095	5	36100529	36227622
Afap1	ENSMUSG00000029094	5	36235968	36346572
Sorcs2	ENSMUSG00000029093	5	36359829	36740788
Psapl1	ENSMUSG00000043430	5	36546670	36549217
Grpel1	ENSMUSG00000029198	5	36807647	36816729
Tada2b	ENSMUSG00000029196	5	36816319	36826934
Ccdc96	ENSMUSG00000050677	5	36827237	36830820
Tbc1d14	ENSMUSG00000029192	5	36833253	36935925
D5Ertd579e	ENSMUSG00000029190	5	36927437	37087263
4931431C16Rik	ENSMUSG00000055061	5	35923876	35931412
Gm15650	ENSMUSG00000087703	5	36065204	36067134
Gm15652	ENSMUSG00000082692	5	36260546	36260850
2210406O10Rik	ENSMUSG00000039563	5	36790260	36807502
A930033C23Rik	ENSMUSG00000093526	5	35739468	35742668
Plk-ps1	ENSMUSG00000083907	5	35896833	35898620
Mir467g	ENSMUSG00000080556	5	35075502	35075621
Mir3097	ENSMUSG00000093097	5	35363698	35363764
U6	ENSMUSG00000089407	5	37057530	37057633
SNORA17	ENSMUSG00000089197	5	37062897	37063020
Cno	ENSMUSG00000060708	5	37138613	37139918
Mrfap1	ENSMUSG00000055302	5	37186106	37188011
Man2b2	ENSMUSG00000029119	5	37198160	37221892
Ppp2r2c	ENSMUSG00000029120	5	37259752	37346317
Wfs1	ENSMUSG00000039474	5	37357343	37380221
4933401P06Rik	ENSMUSG00000087487	5	37264834	37268118
Jakmip1	ENSMUSG00000063646	5	37419574	37539240
Gm17286	ENSMUSG00000073493	5	37429403	37432885
Gm1043	ENSMUSG00000070823	5	37577136	37584262
Crmp1	ENSMUSG00000029121	5	37633319	37683371
Evc	ENSMUSG00000029122	5	37680337	37728133
Evc2	ENSMUSG00000050248	5	37729717	37816294
5S_rRNA	ENSMUSG00000088707	5	37483497	37483599
Lphn3	ENSMUSG00000037605	5	81449163	82254158
Tecrl	ENSMUSG00000049537	5	83707170	83784220
Gm16054	ENSMUSG00000087431	5	82220934	82227451
Gm15626	ENSMUSG00000081822	5	83728610	83729477
U6	ENSMUSG00000089162	5	83232790	83232886
AC104196.1	ENSMUSG00000077914	5	82164943	82165036
Mir1187	ENSMUSG00000080586	5	83227969	83228090
SNORA17	ENSMUSG00000077288	5	84077848	84077979
U4	ENSMUSG00000084731	5	84119029	84119150
Nkx6-1	ENSMUSG00000035187	5	102087158	102094245
Cds1	ENSMUSG00000029330	5	102194149	102252877
Wdfy3	ENSMUSG00000043940	5	102261972	102498940
Arhgap24	ENSMUSG00000057315	5	102910410	103326955
Mapk10	ENSMUSG00000046709	5	103336967	103640353
Gm20484	ENSMUSG00000092503	5	102028333	102031394
Gm20548	ENSMUSG00000092354	5	102266435	102275429
Ptpn13	ENSMUSG00000034573	5	103854211	104027378
Slc10a6	ENSMUSG00000029321	5	104034730	104058422
7SK	ENSMUSG00000088474	5	104031606	104031898
Gm15844	ENSMUSG00000084126	5	104053490	104054065
1700016H13Rik	ENSMUSG00000029320	5	104077058	104085029
U1	ENSMUSG00000088121	5	104087256	104087426
Aff1	ENSMUSG00000029313	5	104121393	104284341
Klhl8	ENSMUSG00000029312	5	104290992	104340278
U6	ENSMUSG00000064629	5	104327898	104328004
Hsd17b13	ENSMUSG00000034528	5	104384459	104406429
Hsd17b11	ENSMUSG00000029311	5	104418781	104450938
Gm8200	ENSMUSG00000082527	5	104418389	104418610
Nudt9	ENSMUSG00000029310	5	104475325	104494398
AL714024.1	ENSMUSG00000093690	5	104477022	104477082
Gm17660	ENSMUSG00000091034	5	104499083	104506627
Sparcl1	ENSMUSG00000029309	5	104508130	104543107
Dspp	ENSMUSG00000053268	5	104599731	104609146
Dmp1	ENSMUSG00000029307	5	104631632	104643121
Ibsp	ENSMUSG00000029306	5	104728190	104740488
Mepe	ENSMUSG00000053863	5	104754348	104767630
Spp1	ENSMUSG00000029304	5	104864137	104870069
Gm10047	ENSMUSG00000058736	5	104884157	104885486
Pkd2	ENSMUSG00000034462	5	104888469	104934838
BC005561	ENSMUSG00000079065	5	104937371	104951402
Gm8258	ENSMUSG00000048334	5	105204930	105205843
Zfp951	ENSMUSG00000072774	5	105242366	105246371
Gm3209	ENSMUSG00000090970	5	105314891	105315145
Gm16990	ENSMUSG00000087488	5	104538236	104548706
D930016D06Rik	ENSMUSG00000090739	5	104954754	104983230
AC122775.1	ENSMUSG00000077133	5	104726207	104726316
Abcg3	ENSMUSG00000029299	5	105364076	105411737
Gbp8	ENSMUSG00000034438	5	105443172	105482580
Gbp9	ENSMUSG00000029298	5	105507413	105539311
Gm5870	ENSMUSG00000044129	5	105418066	105418350
U6	ENSMUSG00000064523	5	105365670	105365776
Gbp4	ENSMUSG00000079363	5	105544786	105568605
Gbp10	ENSMUSG00000054588	5	105643926	105668552
Gbp6	ENSMUSG00000079362	5	105699723	105722718
Gbp11	ENSMUSG00000092021	5	105755499	105772948
Lrrc8b	ENSMUSG00000070639	5	105844794	105915208
Lrrc8c	ENSMUSG00000054720	5	105948407	106042037
Lrrc8d	ENSMUSG00000046079	5	106128988	106261455
D830014E11Rik	ENSMUSG00000045750	5	106253530	106261453
Gm10359	ENSMUSG00000072451	5	106291585	106292764
Zfp326	ENSMUSG00000029290	5	106305584	106344837
C230066G23Rik	ENSMUSG00000085771	5	106009459	106010791
Rps15a-ps5	ENSMUSG00000067058	5	106226340	106226732
Gm15817	ENSMUSG00000084878	5	106243792	106248007
Gm16834	ENSMUSG00000086871	5	105830264	105835989
AC137107.1	ENSMUSG00000092911	5	106203169	106203241
U6	ENSMUSG00000065942	5	106501346	106501452
Barhl2	ENSMUSG00000034384	5	106881533	106887469
Gm17696	ENSMUSG00000090531	5	106894817	106900026
Zfp644	ENSMUSG00000049606	5	106929913	107126306
Gm17304	ENSMUSG00000091096	5	107038117	107038220
U6atac	ENSMUSG00000088602	5	107099018	107099140
Hfm1	ENSMUSG00000043410	5	107269211	107355340
Olfr719-ps	ENSMUSG00000067047	5	107335757	107335999
Cdc7	ENSMUSG00000029283	5	107393341	107413451
Tgfbr3	ENSMUSG00000029287	5	107535589	107718648
Brdt	ENSMUSG00000029279	5	107760178	107816077
Ephx4	ENSMUSG00000033805	5	107831755	107859054
Lpcat2b	ENSMUSG00000033794	5	107860568	107864058
Btbd8	ENSMUSG00000070632	5	107867016	107920647
Gm8145	ENSMUSG00000084218	5	107670642	107671386
Gm8152	ENSMUSG00000081798	5	107810400	107811036
Gm17202	ENSMUSG00000090558	5	107833842	107860929
n-R5s173	ENSMUSG00000064554	5	107830338	107830456
U6	ENSMUSG00000088429	5	107731965	107732066
A830010M20Rik	ENSMUSG00000044060	5	107924917	108009615
1700028K03Rik	ENSMUSG00000089798	5	107937963	107980568
Gm9727	ENSMUSG00000089628	5	107907545	107908099
Glmn	ENSMUSG00000029276	5	107977986	108026907
Rpap2	ENSMUSG00000033773	5	108026392	108090857
A930041C12Rik	ENSMUSG00000085900	5	108059269	108062869
Gfi1	ENSMUSG00000029275	5	108145674	108155056
Gm17717	ENSMUSG00000091666	5	108088116	108117034
A430072P03Rik	ENSMUSG00000090030	5	108154177	108157821
Evi5	ENSMUSG00000011831	5	108173814	108304126
1700013N18Rik	ENSMUSG00000063447	5	108259272	108260361
Rpl5	ENSMUSG00000058558	5	108329521	108338024
Fam69a	ENSMUSG00000029270	5	108337072	108416104
Mtf2	ENSMUSG00000029267	5	108494693	108538023
Tmed5	ENSMUSG00000063406	5	108535385	108561639
Ccdc18	ENSMUSG00000056531	5	108561933	108661966
Dr1	ENSMUSG00000029265	5	108697916	108709545
Pigg	ENSMUSG00000029263	5	108741628	108778374
Gm10419	ENSMUSG00000072769	5	108798877	108807258
Pde6b	ENSMUSG00000029491	5	108817410	108861416
Atp5k	ENSMUSG00000050856	5	108862263	108863467
Mfsd7a	ENSMUSG00000029490	5	108870073	108877910
Pcgf3	ENSMUSG00000033623	5	108890251	108935995
Cplx1	ENSMUSG00000033615	5	108947573	108979043
Gak	ENSMUSG00000062234	5	108998430	109058758
Gm16007	ENSMUSG00000083609	5	108273409	108273694
Gm9850	ENSMUSG00000084855	5	108431279	108431505
Gm10086	ENSMUSG00000060730	5	108946182	108946589
SNORA66	ENSMUSG00000077222	5	108334196	108334327
SNORA66	ENSMUSG00000077426	5	108336364	108336495
Snord21	ENSMUSG00000064453	5	108333574	108333667
Tmem175	ENSMUSG00000013495	5	109058789	109076789
Dgkq	ENSMUSG00000004815	5	109075712	109098691
Idua	ENSMUSG00000033540	5	109089350	109113576
Slc26a1	ENSMUSG00000046959	5	109098897	109104588
Fgfrl1	ENSMUSG00000008090	5	109123248	109135969
Rnf212	ENSMUSG00000055385	5	109158481	109178467
Tmed11	ENSMUSG00000004821	5	109206254	109224382
Vmn2r8	ENSMUSG00000090961	5	109226212	109237773
Vmn2r9	ENSMUSG00000091624	5	109271966	109281529
Gm18594	ENSMUSG00000093756	5	109250740	109252142
RP24-465G18.2	ENSMUSG00000093479	5	109278800	109378274
Vmn2r-ps21	ENSMUSG00000093510	5	109301674	109321399
Vmn2r10	ENSMUSG00000067010	5	109422431	109435490
Vmn2r11	ENSMUSG00000091450	5	109475892	109488471
Vmn2r12	ENSMUSG00000090688	5	109514868	109526883
Vmn2r13	ENSMUSG00000091635	5	109585087	109621126
Vmn2r14	ENSMUSG00000091059	5	109644521	109653641
Vmn2r15	ENSMUSG00000091375	5	109715288	109726575
Vmn2r16	ENSMUSG00000092080	5	109759400	109793500
Vmn2r17	ENSMUSG00000091879	5	109849032	109882406
Crlf2	ENSMUSG00000033467	5	109983730	109988012
5430403G16Rik	ENSMUSG00000072763	5	110103564	110120060
Gm18595	ENSMUSG00000093725	5	109401816	109404914
Gm5871	ENSMUSG00000093545	5	109445217	109445934
Gm8473	ENSMUSG00000093543	5	109665563	109667447
Gm7171	ENSMUSG00000093663	5	109825349	109831111
Gm8488	ENSMUSG00000093688	5	109956479	109958489
4930522L14Rik	ENSMUSG00000072762	5	110165009	110180905
Gm8508	ENSMUSG00000049477	5	110186541	110186950
Gm16739	ENSMUSG00000085131	5	110351668	110352500
Gm15446	ENSMUSG00000090015	5	110352419	110372955
Zfp932	ENSMUSG00000066613	5	110425540	110439430
1010001B22Rik	ENSMUSG00000091434	5	110424530	110425417
Gm17655	ENSMUSG00000090963	5	110475251	110475505
Plcxd1	ENSMUSG00000064247	5	110528988	110534972
Gtpbp6	ENSMUSG00000033434	5	110532994	110537216
Zfp605	ENSMUSG00000023284	5	110539111	110560756
Gm15484	ENSMUSG00000081865	5	110547041	110547868
Chfr	ENSMUSG00000014668	5	110564859	110600991
Gm15787	ENSMUSG00000086247	5	110583419	110605523
Golga3	ENSMUSG00000029502	5	110605720	110655489
Ankle2	ENSMUSG00000029501	5	110660060	110685666
Pgam5	ENSMUSG00000029500	5	110688149	110698932
Gm16728	ENSMUSG00000087494	5	110688182	110698866
Pxmp2	ENSMUSG00000029499	5	110703301	110715205
Gm15788	ENSMUSG00000087439	5	110691180	110706286
Pole	ENSMUSG00000007080	5	110715325	110766493
Gm15791	ENSMUSG00000081256	5	110757223	110757541
SNORA70	ENSMUSG00000087722	5	110757051	110757202
P2rx2	ENSMUSG00000029503	5	110768831	110772168
Gm1679	ENSMUSG00000072754	5	110783115	110785106
Gm15792	ENSMUSG00000085606	5	110760225	110762222
Fbrsl1	ENSMUSG00000043323	5	110790773	110877522
Gm17724	ENSMUSG00000090661	5	110814854	110817092
A630023P12Rik	ENSMUSG00000048215	5	110943942	110954999
Galnt9	ENSMUSG00000033316	5	110973364	111050401
Noc4l	ENSMUSG00000033294	5	111077437	111082436
Ddx51	ENSMUSG00000029504	5	111082470	111089515
Ep400	ENSMUSG00000029505	5	111093392	111199736
U6	ENSMUSG00000065775	5	111106143	111106249
SNORA49	ENSMUSG00000077254	5	111121068	111121200
U6	ENSMUSG00000065071	5	111186104	111186210
Pus1	ENSMUSG00000029507	5	111202686	111209678
Ulk1	ENSMUSG00000029512	5	111213507	111239116
Gm15559	ENSMUSG00000086401	5	111199968	111208279
Gm17598	ENSMUSG00000091066	5	111208901	111210146
Hscb	ENSMUSG00000043510	5	111258089	111268796
Chek2	ENSMUSG00000029521	5	111269036	111303152
Ttc28	ENSMUSG00000033209	5	111308822	111718800
Gm15989	ENSMUSG00000081104	5	111334263	111334760
Gm15988	ENSMUSG00000083771	5	111437499	111437865
Mir701	ENSMUSG00000076163	5	111433163	111433271
Tmem132d	ENSMUSG00000034310	5	128263861	128938937
Fzd10	ENSMUSG00000081683	5	129106719	129109968
Piwil1	ENSMUSG00000029423	5	129242121	129261349
Rimbp2	ENSMUSG00000029420	5	129266276	129459237
Stx2	ENSMUSG00000029428	5	129490432	129514449
Ran	ENSMUSG00000029430	5	129525944	129530198
Gpr133	ENSMUSG00000044017	5	129602625	129710474
Sfswap	ENSMUSG00000029439	5	130007106	130077258
Mmp17	ENSMUSG00000029436	5	130090089	130114086
Gm6139	ENSMUSG00000057244	5	130128827	130129760
Zfp11	ENSMUSG00000051034	5	130160468	130175974
Sept14	ENSMUSG00000034219	5	130189277	130210134
Mrps17	ENSMUSG00000034211	5	130221372	130224750
Gbas	ENSMUSG00000029432	5	130230938	130264203
Psph	ENSMUSG00000029446	5	130271434	130293129
Cct6a	ENSMUSG00000029447	5	130293315	130321696
Sumf2	ENSMUSG00000025538	5	130322866	130339928
Phkg1	ENSMUSG00000025537	5	130339297	130374419
Gm17132	ENSMUSG00000061331	5	128357703	128358860
Gm17131	ENSMUSG00000085328	5	128358901	128362746
5930412G12Rik	ENSMUSG00000072591	5	129084981	129106568
Fzd10	ENSMUSG00000089856	5	129106806	129109236
Rps16-ps2	ENSMUSG00000060419	5	129633952	129634446
Gm15903	ENSMUSG00000086916	5	130232921	130234260
AC114657.1	ENSMUSG00000092933	5	130090030	130090104
AC166933.1	ENSMUSG00000077816	5	128941118	128941211
SNORA22	ENSMUSG00000065304	5	130295415	130295549
Snora15	ENSMUSG00000093413	5	130300422	130300552
Chchd2	ENSMUSG00000070493	5	130357027	130363340
2410018M08Rik	ENSMUSG00000034173	5	130371593	130379493
4930579G22Rik	ENSMUSG00000025535	5	130384410	130387150
Vkorc1l1	ENSMUSG00000066735	5	130417979	130460615
Gusb	ENSMUSG00000025534	5	130464881	130478919
Asl	ENSMUSG00000025533	5	130487128	130501002
Crcp	ENSMUSG00000025532	5	130505160	130536659
Tpst1	ENSMUSG00000034118	5	130549196	130611599
Kctd7	ENSMUSG00000034110	5	130620731	130631676
Rabgef1	ENSMUSG00000025340	5	130647668	130690212
0610007L01Rik	ENSMUSG00000053094	5	130695614	130719635
Sbds	ENSMUSG00000025337	5	130721601	130731400
Tyw1	ENSMUSG00000056310	5	130731489	130817433
Caln1	ENSMUSG00000060371	5	130845346	131316515
A330070K13Rik	ENSMUSG00000052014	5	130854648	130860501
Gm15920	ENSMUSG00000080893	5	130664265	130664666
Gm15921	ENSMUSG00000083146	5	130683950	130684432
Tfec	ENSMUSG00000029553	6	16783381	16848441
Tes	ENSMUSG00000029552	6	17015149	17055828
Cav2	ENSMUSG00000000058	6	17231185	17239115
Cav1	ENSMUSG00000007655	6	17256335	17291452
Met	ENSMUSG00000009376	6	17413800	17523980
Capza2	ENSMUSG00000015733	6	17586234	17616972
St7	ENSMUSG00000029534	6	17642933	17893025
Wnt2	ENSMUSG00000010797	6	17938940	17980585
Asz1	ENSMUSG00000010796	6	18000964	18059061
Cftr	ENSMUSG00000041301	6	18120687	18272768
Cttnbp2	ENSMUSG00000000416	6	18316478	18465338
Gm5721	ENSMUSG00000081744	6	16875231	16876926
Gm15473	ENSMUSG00000084772	6	17008806	17014996
Gm4876	ENSMUSG00000054556	6	17015010	17121833
D830026I12Rik	ENSMUSG00000085171	6	17147751	17160152
Gm15581	ENSMUSG00000085264	6	17156823	17335604
Gm13898	ENSMUSG00000086409	6	17660598	17661225
Gm13899	ENSMUSG00000081077	6	17661687	17662941
Gm15593	ENSMUSG00000084203	6	18094734	18095741
Gm15596	ENSMUSG00000082289	6	18106337	18107120
Gm15592	ENSMUSG00000087389	6	18220136	18239048
Gm15595	ENSMUSG00000080767	6	18244271	18245231
Gm15594	ENSMUSG00000084947	6	18374684	18377885
U6	ENSMUSG00000064965	6	17386306	17386412
AC027654.1	ENSMUSG00000093271	6	18399271	18399340
U6	ENSMUSG00000065051	6	18677292	18677398
Gm5874	ENSMUSG00000071568	6	18774552	18775058
Naa38	ENSMUSG00000044155	6	18798579	18805751
Gm16854	ENSMUSG00000085607	6	18794220	18797360
Ankrd7	ENSMUSG00000029517	6	18816318	18829586
7SK	ENSMUSG00000084650	6	18996837	18997151
7SK	ENSMUSG00000088880	6	19291329	19291586
Gm15573	ENSMUSG00000080759	6	52995878	52996417
9530036M11Rik	ENSMUSG00000087670	6	54096881	54100931
Gm15526	ENSMUSG00000080205	6	54127474	54127677
Gm15527	ENSMUSG00000086946	6	54195736	54229070
9130019P16Rik	ENSMUSG00000073067	6	54219675	54380215
Gm15863	ENSMUSG00000085341	6	54585183	54593344
2410066E13Rik	ENSMUSG00000038065	6	54631734	54653845
Znrf2	ENSMUSG00000058446	6	54766910	54843494
Nod1	ENSMUSG00000038058	6	54873936	54922606
Ggct	ENSMUSG00000002797	6	54932574	54942944
Jazf1	ENSMUSG00000063568	6	52718791	53018625
9430076C15Rik	ENSMUSG00000090982	6	53237289	53397716
Creb5	ENSMUSG00000053007	6	53523378	53646001
Tril	ENSMUSG00000043496	6	53765465	53770819
Gm16499	ENSMUSG00000078169	6	53769969	53770034
Cpvl	ENSMUSG00000052955	6	53823373	53928656
Chn2	ENSMUSG00000004633	6	53989548	54251804
Prr15	ENSMUSG00000045725	6	54277006	54280194
Wipf3	ENSMUSG00000086040	6	54379597	54453762
Scrn1	ENSMUSG00000019124	6	54455884	54516483
Fkbp14	ENSMUSG00000038074	6	54527598	54547338
Plekha8	ENSMUSG00000005225	6	54545105	54595833
U1	ENSMUSG00000065216	6	53383968	53384131
SNORA17	ENSMUSG00000077501	6	54924645	54924773
SNORA17	ENSMUSG00000077773	6	53822011	53822142
Gars	ENSMUSG00000029777	6	54987995	55029498
Gm9001	ENSMUSG00000080824	6	75732352	75732750
Gm9008	ENSMUSG00000072476	6	76445472	76447778
Ctnna2	ENSMUSG00000063063	6	76831631	77929693
Lrrtm1	ENSMUSG00000060780	6	77192683	77207785
U3	ENSMUSG00000088100	6	76582652	76582773
U1	ENSMUSG00000064490	6	76150112	76150272
Il5ra	ENSMUSG00000005364	6	106660378	106695103
Trnt1	ENSMUSG00000013736	6	106719114	106732468
Crbn	ENSMUSG00000005362	6	106728243	106750068
Lrrn1	ENSMUSG00000034648	6	107479779	107520204
Cntn4	ENSMUSG00000064293	6	105627654	106649304
AC167724.1	ENSMUSG00000093127	6	107398813	107398938
U6	ENSMUSG00000064466	6	106951446	106951552
Tnks	ENSMUSG00000031529	8	35892233	36028744
Gm17578	ENSMUSG00000092129	8	34923675	34943566
Gm17702	ENSMUSG00000091853	8	35157602	35159203
Mboat4	ENSMUSG00000071113	8	35178084	35188239
Leprotl1	ENSMUSG00000031513	8	35198626	35210087
Tmem66	ENSMUSG00000031532	8	35217617	35233899
Gm4889	ENSMUSG00000056797	8	35390964	35391407
Dusp4	ENSMUSG00000031530	8	35870351	35882948
Purg	ENSMUSG00000049184	8	34496797	34527940
5930422O12Rik	ENSMUSG00000048544	8	34539181	34540020
Tex15	ENSMUSG00000009628	8	34627210	34696054
Ppp2cb	ENSMUSG00000009630	8	34710093	34730266
Ubxn8	ENSMUSG00000052906	8	34730058	34752448
Gsr	ENSMUSG00000031584	8	34762995	34808635
1700104B16Rik	ENSMUSG00000049476	8	34841021	34842286
Gtf2e2	ENSMUSG00000031585	8	34842386	34887645
Rbpms	ENSMUSG00000031586	8	34893116	35040313
Dctn6	ENSMUSG00000031516	8	35153474	35171850
Gm9951	ENSMUSG00000054618	8	35112316	35120100
Gm10131	ENSMUSG00000063412	8	35174442	35174756
Gm9939	ENSMUSG00000054247	8	36028106	36029263
Ppp1r3b	ENSMUSG00000046794	8	36438795	36451178
AC134443.1	ENSMUSG00000080434	8	35358910	35359030
SNORA48	ENSMUSG00000088856	8	34802273	34802416
AC123616.1	ENSMUSG00000092649	8	35004156	35004412
Eri1	ENSMUSG00000031527	8	36528319	36558587
Mfhas1	ENSMUSG00000070056	8	36650852	36742503
Gm16793	ENSMUSG00000087118	8	36645626	36652026
Cldn23	ENSMUSG00000055976	8	36887766	36889613
5S_rRNA	ENSMUSG00000088182	8	36810503	36810616
Hpgd	ENSMUSG00000031613	8	58773349	58799843
BC088983	ENSMUSG00000038215	8	59010319	59029844
Fbxo8	ENSMUSG00000038206	8	59029887	59071190
Hand2	ENSMUSG00000038193	8	59799780	59803314
Scrg1	ENSMUSG00000031610	8	59934720	59956382
Sap30	ENSMUSG00000031609	8	59961504	59966657
Hmgb2	ENSMUSG00000054717	8	59990640	59994796
Galnt7	ENSMUSG00000031608	8	60002625	60131829
Galntl6	ENSMUSG00000061864	8	60255979	61390424
5033428I22Rik	ENSMUSG00000085268	8	59810915	59819479
2500002B13Rik	ENSMUSG00000086276	8	59966851	59987674
Gm10284	ENSMUSG00000070025	8	60029049	60030280
SNORA17	ENSMUSG00000077585	8	59000169	59000300
AC116121.1	ENSMUSG00000076392	8	59040098	59040206
SNORA65	ENSMUSG00000077526	8	60028572	60028685
Gm17517	ENSMUSG00000091944	8	60650232	60777663
Gm15882	ENSMUSG00000090003	8	61002091	61003123
Gm15881	ENSMUSG00000085254	8	61178643	61179584
Ap1m1	ENSMUSG00000003033	8	74763917	74781284
Gm10282	ENSMUSG00000070713	8	74828009	74829159
Klf2	ENSMUSG00000055148	8	74842932	74845555
Eps15l1	ENSMUSG00000006276	8	74864900	74945373
Calr3	ENSMUSG00000019732	8	74948075	74967769
1700030K09Rik	ENSMUSG00000052794	8	74967779	74984900
Cherp	ENSMUSG00000052488	8	74984388	74999132
Slc35e1	ENSMUSG00000019731	8	75001895	75016513
Med26	ENSMUSG00000045248	8	75018457	75072209
9130011J15Rik	ENSMUSG00000044600	8	75089087	75094987
Tmem38a	ENSMUSG00000031791	8	75096002	75111181
Nwd1	ENSMUSG00000048148	8	75170610	75238645
Sin3b	ENSMUSG00000031622	8	75247187	75282102
F2rl3	ENSMUSG00000050147	8	75285779	75287773
Large	ENSMUSG00000004383	8	75338498	75877439
Gm17435	ENSMUSG00000090373	8	75016833	75029398
Gm3835	ENSMUSG00000083922	8	74953449	74953851
Crry-ps	ENSMUSG00000047657	8	76274200	76274682
SNORA50	ENSMUSG00000089447	8	75699018	75699157
AC138317.1	ENSMUSG00000076199	8	76165295	76165404
Mir28b	ENSMUSG00000093140	8	75540411	75540490
AC171917.1	ENSMUSG00000093276	8	75208213	75208337
AC158898.1	ENSMUSG00000092750	8	74763101	74763381
Gm11033	ENSMUSG00000079011	8	77114886	77357846
Isx	ENSMUSG00000031621	8	77396618	77417405
Hmgxb4	ENSMUSG00000034518	8	77517255	77555877
Tom1	ENSMUSG00000042870	8	77557585	77594020
Hmox1	ENSMUSG00000005413	8	77617490	77624495
Mcm5	ENSMUSG00000005410	8	77633427	77652338
Rasd2	ENSMUSG00000034472	8	77737843	77748012
Gm10358	ENSMUSG00000072432	8	77929237	77930465
1700007B14Rik	ENSMUSG00000031620	8	77972593	78508402
Gm7984	ENSMUSG00000049891	8	77922410	77922947
Gm7901	ENSMUSG00000082280	8	78235499	78237095
U3	ENSMUSG00000080421	8	77986473	77986694
SNORA17	ENSMUSG00000077537	8	78545828	78545954
Cadm1	ENSMUSG00000032076	9	47338256	47665720
Fam55b	ENSMUSG00000032028	9	48126089	48161537
Fam55d	ENSMUSG00000044229	9	48169509	48207981
Gm5616	ENSMUSG00000063543	9	48258501	48258887
Rexo2	ENSMUSG00000032026	9	48276619	48288716
Rbm7	ENSMUSG00000042396	9	48296814	48303413
Gm5617	ENSMUSG00000042293	9	48303450	48304069
Nnmt	ENSMUSG00000032271	9	48399982	48413258
Zbtb16	ENSMUSG00000066687	9	48462416	48644050
Htr3a	ENSMUSG00000032269	9	48707319	48719204
Htr3b	ENSMUSG00000008590	9	48743113	48773095
Usp28	ENSMUSG00000032267	9	48793490	48850622
Cldn21	ENSMUSG00000091098	9	48855737	48856390
Zw10	ENSMUSG00000032264	9	48863737	48886877
Tmprss5	ENSMUSG00000032268	9	48889365	48925692
Gm4894	ENSMUSG00000054156	9	49076677	49086888
Drd2	ENSMUSG00000032259	9	49148732	49216282
Ankk1	ENSMUSG00000032257	9	49223327	49235126
Ttc12	ENSMUSG00000040219	9	49245068	49294330
Ncam1	ENSMUSG00000039542	9	49310257	49607027
Gm11149	ENSMUSG00000079564	9	49326441	49371049
Gm17616	ENSMUSG00000090896	9	49342705	49342933
AC160992.1	ENSMUSG00000080401	9	48315069	48315165
M5C1000I18Rik	ENSMUSG00000055125	9	67606520	67608015
C2cd4b	ENSMUSG00000091956	9	67607244	67608736
C2cd4a	ENSMUSG00000047990	9	67678339	67680137
Vps13c	ENSMUSG00000035284	9	67688203	67843441
Rora	ENSMUSG00000032238	9	68501593	69236053
Narg2	ENSMUSG00000032235	9	69245713	69280929
Gm4978	ENSMUSG00000062874	9	69298039	69298854
Anxa2	ENSMUSG00000032231	9	69301427	69339602
F830001A07Rik	ENSMUSG00000066690	9	68683148	68683583
Gm15511	ENSMUSG00000086648	9	69196696	69212054
Gm16144	ENSMUSG00000086399	9	69324836	69327405
Mir3109	ENSMUSG00000093042	9	69304751	69304838
SNORA40	ENSMUSG00000088810	9	68128381	68128510
SNORD113	ENSMUSG00000088587	9	68357970	68358042
U6	ENSMUSG00000065163	9	68309146	68309252
Foxb1	ENSMUSG00000059246	9	69605517	69608747
B230323A14Rik	ENSMUSG00000087375	9	69606547	69678652
Bnip2	ENSMUSG00000011958	9	69837273	69856124
Gtf2a2	ENSMUSG00000033543	9	69860357	69870673
Gcnt3	ENSMUSG00000032226	9	69879303	69885895
Fam81a	ENSMUSG00000032224	9	69937117	69990367
SNORA17	ENSMUSG00000077660	9	69996613	69996743
Gm16262	ENSMUSG00000089709	9	94596123	94602738
Gm16126	ENSMUSG00000086585	9	95519330	95548890
Gm16127	ENSMUSG00000086248	9	95537391	95538684
1700065D16Rik	ENSMUSG00000051368	9	95757820	95758288
1190002N15Rik	ENSMUSG00000045414	9	94418283	94438500
Slc9a9	ENSMUSG00000031129	9	94570328	95130864
Chst2	ENSMUSG00000033350	9	95301348	95307689
2610101N10Rik	ENSMUSG00000032407	9	95357313	95412415
Paqr9	ENSMUSG00000064225	9	95460236	95462540
Pcolce2	ENSMUSG00000015354	9	95538020	95598515
Trpc1	ENSMUSG00000032839	9	95607046	95650777
Pls1	ENSMUSG00000049493	9	95653061	95745730
Atr	ENSMUSG00000032409	9	95758016	95852063
Gm16794	ENSMUSG00000086393	9	95842468	95859812
Tfdp2	ENSMUSG00000032411	9	96096694	96224065
Xrn1	ENSMUSG00000032410	9	95855179	95953446
Gk5	ENSMUSG00000041440	9	96019781	96085046
U1	ENSMUSG00000064889	9	94179334	94179490
U1	ENSMUSG00000089085	9	95835032	95835209
SNORA4	ENSMUSG00000065346	9	95524921	95525030
U6	ENSMUSG00000089551	9	94544438	94544533
Gal3st1	ENSMUSG00000049721	11	3883639	3899329
Sec14l4	ENSMUSG00000019368	11	3931465	3948027
Sec14l3	ENSMUSG00000054986	11	3964844	3977739
Mtfp1	ENSMUSG00000004748	11	3991483	3995448
Sec14l2	ENSMUSG00000003585	11	3997042	4023418
Rnf215	ENSMUSG00000003581	11	4035205	4041175
Ccdc157	ENSMUSG00000051427	11	4041126	4060296
Sf3a1	ENSMUSG00000002129	11	4060353	4082544
Tbc1d10a	ENSMUSG00000034412	11	4086792	4115508
Gatsl3	ENSMUSG00000020424	11	4118228	4122412
Osm	ENSMUSG00000058755	11	4136423	4141029
Lif	ENSMUSG00000034394	11	4157560	4172517
Hormad2	ENSMUSG00000020419	11	4245817	4341108
Mtmr3	ENSMUSG00000034354	11	4380871	4494866
Gm11032	ENSMUSG00000079010	11	4520070	4521701
Ascc2	ENSMUSG00000020412	11	4537750	4585702
Uqcr10	ENSMUSG00000059534	11	4601976	4604345
Zmat5	ENSMUSG00000009076	11	4604681	4637672
Cabp7	ENSMUSG00000009075	11	4636895	4646781
Nf2	ENSMUSG00000009073	11	4665848	4749539
Nipsnap1	ENSMUSG00000034285	11	4773954	4794203
Thoc5	ENSMUSG00000034274	11	4795323	4828870
Nefh	ENSMUSG00000020396	11	4838757	4848067
Ap1b1	ENSMUSG00000009090	11	4886827	4942732
Gas2l1	ENSMUSG00000034201	11	4954135	4965330
Rasl10a	ENSMUSG00000034209	11	4958131	4960388
Ewsr1	ENSMUSG00000009079	11	4969692	4999269
Rhbdd3	ENSMUSG00000034175	11	4998929	5006096
Gm11031	ENSMUSG00000079004	11	4999387	4999881
Emid1	ENSMUSG00000034164	11	5006268	5052260
Kremen1	ENSMUSG00000020393	11	5091555	5161561
Znrf3	ENSMUSG00000041961	11	5176327	5344850
Xbp1	ENSMUSG00000020484	11	5420662	5425896
Ccdc117	ENSMUSG00000020482	11	5428890	5442190
Ankrd36	ENSMUSG00000020481	11	5469687	5589340
Gm16518	ENSMUSG00000083015	11	3597433	3598329
Gm11952	ENSMUSG00000084077	11	3772958	3773778
Gm11953	ENSMUSG00000082816	11	3851717	3852719
Gm11954	ENSMUSG00000084170	11	3902460	3902808
Gm11955	ENSMUSG00000082364	11	4007758	4008227
Gm11957	ENSMUSG00000083838	11	4029375	4030153
Gm11956	ENSMUSG00000084012	11	4130757	4131268
Gm11959	ENSMUSG00000085559	11	4174092	4181934
Gm11958	ENSMUSG00000085512	11	4185463	4186942
Gm11960	ENSMUSG00000081974	11	4463655	4464559
Gm11961	ENSMUSG00000056288	11	4520278	4530014
AA413626	ENSMUSG00000084381	11	4818513	4819006
Gm11962	ENSMUSG00000085232	11	5395195	5395449
Gm11963	ENSMUSG00000085189	11	5398843	5405702
Gm11964	ENSMUSG00000081021	11	5534142	5534585
Morc2a	ENSMUSG00000034543	11	3549497	3590480
Osbp2	ENSMUSG00000020435	11	3603734	3763906
4921536K21Rik	ENSMUSG00000020434	11	3786091	3795101
Dusp18	ENSMUSG00000047205	11	3795243	3801299
Slc35e4	ENSMUSG00000048807	11	3807024	3814667
Tcn2	ENSMUSG00000020432	11	3817195	3832162
4930556J24Rik	ENSMUSG00000034493	11	3837544	3876781
Pes1	ENSMUSG00000020430	11	3863978	3880007
Mir3060	ENSMUSG00000093080	11	4039367	4039449
SNORA17	ENSMUSG00000088352	11	3688895	3688993
U6	ENSMUSG00000064632	11	5151853	5151959
SNORA17	ENSMUSG00000077304	11	5460609	5460738
U6	ENSMUSG00000065627	11	4224152	4224258
SNORD125	ENSMUSG00000088634	11	4938214	4938310
Gm11965	ENSMUSG00000081691	11	5578359	5578635
Mrps24	ENSMUSG00000020477	11	5603986	5615683
Urgcp	ENSMUSG00000049680	11	5613420	5662379
Dbnl	ENSMUSG00000020476	11	5688491	5700965
2210015D19Rik	ENSMUSG00000083844	11	5662132	5684713
Pgam2	ENSMUSG00000020475	11	5701643	5703736
Polm	ENSMUSG00000020474	11	5727863	5738019
Aebp1	ENSMUSG00000020473	11	5761950	5772091
Pold2	ENSMUSG00000020471	11	5772183	5778295
Myl7	ENSMUSG00000020469	11	5796640	5798785
Gck	ENSMUSG00000041798	11	5800823	5850084
Gm11966	ENSMUSG00000080904	11	5718500	5718586
Gm11967	ENSMUSG00000084819	11	5815318	5816734
Ykt6	ENSMUSG00000002741	11	5855696	5867783
Camk2b	ENSMUSG00000057897	11	5869647	5966365
Jup	ENSMUSG00000001552	11	100230272	100259077
Leprel4	ENSMUSG00000006931	11	100269770	100276150
Fkbp10	ENSMUSG00000001555	11	100277011	100286138
Nt5c3l	ENSMUSG00000017176	11	100283635	100303122
Klhl10	ENSMUSG00000001558	11	100303231	100318336
Klhl11	ENSMUSG00000048732	11	100323928	100334055
Acly	ENSMUSG00000020917	11	100337667	100389314
Ttc25	ENSMUSG00000006784	11	100406921	100433882
Cnp	ENSMUSG00000006782	11	100436218	100453043
Dnajc7	ENSMUSG00000014195	11	100444132	100481482
Nkiras2	ENSMUSG00000017837	11	100480558	100488921
Zfp385c	ENSMUSG00000014198	11	100487533	100553769
Dhx58	ENSMUSG00000017830	11	100556018	100565585
Kat2a	ENSMUSG00000020918	11	100566060	100573779
Hspb9	ENSMUSG00000017832	11	100575164	100575889
Rab5c	ENSMUSG00000019173	11	100576323	100599529
Kcnh4	ENSMUSG00000035355	11	100601690	100621256
Hcrt	ENSMUSG00000045471	11	100622383	100624245
Ghdc	ENSMUSG00000017747	11	100627346	100632271
Stat5b	ENSMUSG00000020919	11	100642045	100712038
Stat5a	ENSMUSG00000004043	11	100720665	100746483
Stat3	ENSMUSG00000004040	11	100746412	100800854
Ptrf	ENSMUSG00000004044	11	100818047	100832201
Atp6v0a1	ENSMUSG00000019302	11	100870766	100925033
Naglu	ENSMUSG00000001751	11	100931326	100938986
Hsd17b1	ENSMUSG00000019301	11	100939725	100941841
Coasy	ENSMUSG00000001755	11	100943879	100947933
Mlx	ENSMUSG00000017801	11	100948591	100953521
Psmc3ip	ENSMUSG00000019303	11	100953137	100956750
Fam134c	ENSMUSG00000017802	11	100957636	100981207
Tubg1	ENSMUSG00000035198	11	100981252	100987733
Tubg2	ENSMUSG00000045007	11	101017221	101023101
Plekhh3	ENSMUSG00000035172	11	101023993	101032665
Cntnap1	ENSMUSG00000017167	11	101031837	101052038
Ccr10	ENSMUSG00000044052	11	101034311	101036757
Ezh1	ENSMUSG00000006920	11	101052429	101087777
Ramp2	ENSMUSG00000001240	11	101107342	101120860
Vps25	ENSMUSG00000078656	11	101115021	101120863
Wnk4	ENSMUSG00000035112	11	101121881	101138723
Ccdc56	ENSMUSG00000017188	11	101139282	101140428
Cntd1	ENSMUSG00000078653	11	101140326	101157631
Becn1	ENSMUSG00000035086	11	101147266	101163600
Psme3	ENSMUSG00000078652	11	101177527	101184851
Aoc2	ENSMUSG00000078651	11	101186377	101191016
Aoc3	ENSMUSG00000019326	11	101191919	101203252
G6pc	ENSMUSG00000078650	11	101228875	101239217
Aarsd1	ENSMUSG00000075528	11	101268006	101286647
Rundc1	ENSMUSG00000035007	11	101286399	101296987
Rpl27	ENSMUSG00000063316	11	101303612	101306843
Ifi35	ENSMUSG00000010358	11	101309721	101320012
Vat1	ENSMUSG00000034993	11	101320059	101327544
Rnd2	ENSMUSG00000001313	11	101326313	101333167
Brca1	ENSMUSG00000017146	11	101350078	101413269
Nbr1	ENSMUSG00000017119	11	101413463	101443265
Tmem106a	ENSMUSG00000034947	11	101443556	101453102
Rdm1	ENSMUSG00000010362	11	101488509	101497414
Arl4d	ENSMUSG00000034936	11	101526855	101529146
Dhx8	ENSMUSG00000034931	11	101594233	101628672
Etv4	ENSMUSG00000017724	11	101631056	101646685
Meox1	ENSMUSG00000001493	11	101738824	101755688
Sost	ENSMUSG00000001494	11	101823772	101828329
Dusp3	ENSMUSG00000003518	11	101832457	101848327
1700006E09Rik	ENSMUSG00000010841	11	101845593	101853578
Mpp3	ENSMUSG00000052373	11	101860966	101889775
Cd300lg	ENSMUSG00000017309	11	101902823	101916934
Mpp2	ENSMUSG00000017314	11	101918329	101949829
Ppy	ENSMUSG00000017316	11	101961244	101962633
Pyy	ENSMUSG00000017311	11	101967990	101969146
Nags	ENSMUSG00000048217	11	102006827	102010791
Tmem101	ENSMUSG00000020921	11	102013860	102017718
Lsm12	ENSMUSG00000020922	11	102023811	102046610
G6pc3	ENSMUSG00000034793	11	102050934	102055395
Hdac5	ENSMUSG00000008855	11	102055746	102091480
Atxn7l3	ENSMUSG00000059995	11	102150614	102157945
Asb16	ENSMUSG00000034768	11	102130057	102140776
Tmub2	ENSMUSG00000034757	11	102146245	102150551
Slc4a1	ENSMUSG00000006574	11	102210138	102227517
Rundc3a	ENSMUSG00000006575	11	102254717	102263869
Gm12348	ENSMUSG00000086031	11	100262822	100263566
Gm11547	ENSMUSG00000085604	11	100548731	100558834
Gm11615	ENSMUSG00000085083	11	101126076	101127617
Gm11617	ENSMUSG00000084152	11	101168056	101168694
Gm11618	ENSMUSG00000083991	11	101213550	101214453
Gm11619	ENSMUSG00000082478	11	101214623	101214859
Gm11626	ENSMUSG00000086347	11	101317890	101318704
Gm11625	ENSMUSG00000080839	11	101337540	101337835
Gm11634	ENSMUSG00000085486	11	101455057	101460570
Gm11635	ENSMUSG00000086617	11	101471928	101477270
Gm11551	ENSMUSG00000085594	11	101747551	101752520
Rpl27-ps2	ENSMUSG00000082171	11	101800815	101801213
4930417O22Rik	ENSMUSG00000071818	11	101813735	101821887
RP23-398F7.15	ENSMUSG00000093467	11	101832457	101833173
E130111B04Rik	ENSMUSG00000087216	11	101891582	101896398
Gm11584	ENSMUSG00000084200	11	101974563	101974887
Gm11585	ENSMUSG00000082045	11	101985386	101985954
Gm11586	ENSMUSG00000087339	11	102006863	102007560
Gm11616	ENSMUSG00000087330	11	102236863	102238334
Ubtf	ENSMUSG00000020923	11	102165874	102181056
BC030867	ENSMUSG00000034773	11	102110196	102126501
U2	ENSMUSG00000065944	11	101519552	101519742
U2	ENSMUSG00000065767	11	101488680	101488870
U2	ENSMUSG00000064759	11	101258903	101259082
7SK	ENSMUSG00000089049	11	100635827	100636114
U2	ENSMUSG00000064702	11	101503062	101503252
U2	ENSMUSG00000065251	11	101507054	101507244
AL590969.1	ENSMUSG00000076227	11	101214656	101214751
U2	ENSMUSG00000065820	11	101466164	101466354
Prps1l1	ENSMUSG00000046292	12	35669445	35671062
Gm17436	ENSMUSG00000091134	12	36219643	36219702
Ferd3l	ENSMUSG00000046518	12	34613290	34614175
Twist1	ENSMUSG00000035799	12	34642536	34644682
Hdac9	ENSMUSG00000004698	12	34732451	35213754
4921508M14Rik	ENSMUSG00000052376	12	35558427	35559525
Prps1l1	ENSMUSG00000092305	12	35669433	35671108
Snx13	ENSMUSG00000020590	12	35731861	35832141
Ahr	ENSMUSG00000019256	12	36182646	36219710
U6	ENSMUSG00000065195	12	36125862	36125968
SNORA17	ENSMUSG00000077264	12	35579718	35579849
7SK	ENSMUSG00000089043	12	35685009	35685229
Mir680-3	ENSMUSG00000076253	12	35879483	35879569
Agr3	ENSMUSG00000036231	12	36652207	36676323
Agr2	ENSMUSG00000020581	12	36719494	36730674
Tspan13	ENSMUSG00000020577	12	36741144	36769087
Gm5434	ENSMUSG00000059301	12	36816966	36818416
Bzw2	ENSMUSG00000020547	12	36818433	36883412
Ankmy2	ENSMUSG00000036188	12	36883711	36923878
1700108M19Rik	ENSMUSG00000020545	12	36934932	36979985
Sostdc1	ENSMUSG00000036169	12	37040756	37045039
D630036H23Rik	ENSMUSG00000091007	12	37107829	37108768
Ispd	ENSMUSG00000043153	12	37108106	37416031
SNORA17	ENSMUSG00000088906	12	37100361	37100470
Mir5099	ENSMUSG00000092998	12	37542792	37542865
Gm6395	ENSMUSG00000091905	12	65887298	65888021
Fscb	ENSMUSG00000043060	12	65572320	65575885
Gm527	ENSMUSG00000047227	12	66018898	66025578
Klhl28	ENSMUSG00000020948	12	66043427	66066523
Fam179b	ENSMUSG00000035614	12	66066729	66123560
Prpf39	ENSMUSG00000035597	12	66137320	66164373
Fkbp3	ENSMUSG00000020949	12	66163423	66174931
Fancm	ENSMUSG00000055884	12	66176593	66233045
Mis18bp1	ENSMUSG00000047534	12	66233721	66273591
Wdr20b	ENSMUSG00000035560	12	66326504	66329441
U6	ENSMUSG00000088441	12	66631239	66631341
SNORA17	ENSMUSG00000077270	12	66667077	66667208
SNORA17	ENSMUSG00000077218	12	66663150	66663281
SNORD127	ENSMUSG00000087790	12	66157560	66157645
AC131332.1	ENSMUSG00000080648	12	66648374	66648464
SNORA17	ENSMUSG00000077703	12	65837389	65837519
U6	ENSMUSG00000064958	12	64710855	64710961
SNORA17	ENSMUSG00000077590	12	66506833	66506957
Gm6245	ENSMUSG00000090475	13	40873409	40874176
A730081D07Rik	ENSMUSG00000086693	13	41051783	41096520
Gm16989	ENSMUSG00000087310	13	40823177	40830514
Tmem14c	ENSMUSG00000021361	13	41111619	41117944
Ofcc1	ENSMUSG00000047094	13	40097251	40383380
Gcnt2	ENSMUSG00000021360	13	40955501	41056260
Pak1ip1	ENSMUSG00000038683	13	41096392	41108388
Gm9979	ENSMUSG00000055732	13	40799374	40803318
Tfap2a	ENSMUSG00000021359	13	40811044	40829192
Mir5124	ENSMUSG00000093269	13	40961160	40961231
U1	ENSMUSG00000065256	13	39954232	39954396
Mak	ENSMUSG00000021363	13	41120489	41175075
Gcm2	ENSMUSG00000021362	13	41196796	41205357
Sycp2l	ENSMUSG00000038651	13	41209676	41269847
Elovl2	ENSMUSG00000021364	13	41277864	41315774
BC024659	ENSMUSG00000091264	13	41345229	41371943
Gm17364	ENSMUSG00000090853	13	41369172	41369346
Nedd9	ENSMUSG00000021365	13	41405285	41582689
Gm17260	ENSMUSG00000090586	13	41455340	41466277
AC154848.1	ENSMUSG00000092835	13	41673278	41673443
Tmem170b	ENSMUSG00000087370	13	41701585	41736716
Dph3b-ps	ENSMUSG00000059877	13	107336892	107337140
Ipo11	ENSMUSG00000042590	13	107584519	107726995
Ipo11	ENSMUSG00000078933	13	107623940	107637347
Dimt1	ENSMUSG00000021692	13	107737209	107750304
Kif2a	ENSMUSG00000021693	13	107749076	107812206
3830408C21Rik	ENSMUSG00000071181	13	107822043	107823753
Apoo-ps	ENSMUSG00000049233	13	108204221	108204817
Zswim6	ENSMUSG00000032846	13	108514698	108680258
AC165250.1	ENSMUSG00000093334	13	108619304	108619469
snoU2-30	ENSMUSG00000077261	13	107780482	107780547
U6	ENSMUSG00000064854	13	107570194	107570300
Gm16549	ENSMUSG00000090216	14	72989559	73003174
Gm17233	ENSMUSG00000090706	14	73573627	73587128
Fndc3a	ENSMUSG00000033487	14	72937753	73109810
Cysltr2	ENSMUSG00000033470	14	73428935	73448921
Rcbtb2	ENSMUSG00000022106	14	73522844	73607650
Rb1	ENSMUSG00000022105	14	73583480	73725629
Lpar6	ENSMUSG00000033446	14	73637698	73640165
U1	ENSMUSG00000064485	14	72530895	72531028
Mir687	ENSMUSG00000076121	14	73606570	73606658
Esd	ENSMUSG00000021996	14	75132104	75150572
Lrch1	ENSMUSG00000068015	14	75154480	75347684
5031414D18Rik	ENSMUSG00000034959	14	75415834	75452339
Lrrc63	ENSMUSG00000021997	14	75484110	75530690
Lcp1	ENSMUSG00000021998	14	75530908	75630649
Cpb2	ENSMUSG00000021999	14	75642094	75683358
Zc3h13	ENSMUSG00000022000	14	75684180	75744233
Siah3	ENSMUSG00000091722	14	75855789	75925948
Spert	ENSMUSG00000034913	14	75982641	75992923
4930564B18Rik	ENSMUSG00000022002	14	76042066	76066944
Cog3	ENSMUSG00000034893	14	76102158	76154300
Slc25a30	ENSMUSG00000022003	14	76161806	76186844
Tpt1	ENSMUSG00000060126	14	76244900	76248332
Gtf2f2	ENSMUSG00000067995	14	76296744	76410672
Kctd4	ENSMUSG00000046523	14	76354810	76365024
1200011I18Rik	ENSMUSG00000022008	14	76486039	76510622
Nufip1	ENSMUSG00000022009	14	76510698	76537186
Gm15628	ENSMUSG00000089733	14	75536077	75536719
Gm15629	ENSMUSG00000090054	14	75596880	75599078
Gm4285	ENSMUSG00000085829	14	76243186	76244771
Htr2a	ENSMUSG00000034997	14	75040647	75106666
SNORA5	ENSMUSG00000065799	14	76372293	76372426
Snora31	ENSMUSG00000065147	14	76247712	76247841
5S_rRNA	ENSMUSG00000089405	14	76145656	76145747
U6	ENSMUSG00000064394	14	76051230	76051336
Rpl27a-ps2	ENSMUSG00000058430	14	109091411	109091860
Slitrk1	ENSMUSG00000075478	14	109309208	109313456
SNORA17	ENSMUSG00000089119	14	110282271	110282400
AC134912.1	ENSMUSG00000093128	14	110350616	110350711
n-R5s50	ENSMUSG00000065102	14	110561057	110561167
SNORA17	ENSMUSG00000089455	14	109021760	109021877
U6	ENSMUSG00000064989	14	110827379	110827485
U6	ENSMUSG00000065268	14	110996838	110996944
Slitrk6	ENSMUSG00000045871	14	111147800	111154371
U6	ENSMUSG00000084441	14	111131258	111131360
Gm6280	ENSMUSG00000060796	14	111370010	111370693
AC123985.1	ENSMUSG00000093362	14	111681268	111681356
Slitrk5	ENSMUSG00000033214	14	112074337	112082356
U6	ENSMUSG00000088995	14	112365179	112365270
Cldn10	ENSMUSG00000022132	14	119187093	119274711
Abcc4	ENSMUSG00000032849	14	118881914	119105441
Gm16847	ENSMUSG00000085191	14	118507053	118516322
Gm17668	ENSMUSG00000091690	14	118762954	118783990
Dzip1	ENSMUSG00000042156	14	119274742	119324609
Dnajc3	ENSMUSG00000022136	14	119337154	119380924
Uggt2	ENSMUSG00000042104	14	119384261	119498652
Hs6st3	ENSMUSG00000053465	14	119537637	120268816
Gm4675	ENSMUSG00000090534	14	118635454	118660421
Gm16835	ENSMUSG00000087479	14	119498187	119514296
Gpc6	ENSMUSG00000058571	14	117324519	118378751
Dct	ENSMUSG00000022129	14	118412014	118451468
Tgds	ENSMUSG00000022130	14	118511133	118531987
Gpr180	ENSMUSG00000022131	14	118536349	118563454
Sox21	ENSMUSG00000061517	14	118632454	118636252
Gm9376	ENSMUSG00000092109	14	118666380	118666990
U6	ENSMUSG00000064644	14	118984261	118984360
SNORA17	ENSMUSG00000088095	14	118699212	118699339
SNORA17	ENSMUSG00000088105	14	119174374	119174504
n-R5s51	ENSMUSG00000077661	14	119226131	119226253
Pgcp	ENSMUSG00000039007	15	33012884	33524307
Tspyl5	ENSMUSG00000038984	15	33613631	33617638
Mtdh	ENSMUSG00000022255	15	34012449	34072141
Laptm4b	ENSMUSG00000022257	15	34167781	34214050
Matn2	ENSMUSG00000022324	15	34236436	34366029
Rpl30	ENSMUSG00000058600	15	34370260	34373395
BC030476	ENSMUSG00000044726	15	34383067	34403647
Hrsp12	ENSMUSG00000022323	15	34413776	34425010
Pop1	ENSMUSG00000022325	15	34425059	34460403
Nipal2	ENSMUSG00000038879	15	34502554	34608461
Kcns2	ENSMUSG00000050963	15	34767110	34772095
Stk3	ENSMUSG00000022329	15	34805251	35085561
Osr2	ENSMUSG00000022330	15	35225853	35233059
Vps13b	ENSMUSG00000037646	15	35301301	35860983
SNORA4	ENSMUSG00000089072	15	34069008	34069131
U6	ENSMUSG00000084607	15	34461469	34461578
SNORA72	ENSMUSG00000065899	15	34370546	34370677
SNORD88	ENSMUSG00000084738	15	34218574	34218626
5S_rRNA	ENSMUSG00000088062	15	33519361	33519491
SNORA17	ENSMUSG00000089133	15	35417155	35417291
Cox6c	ENSMUSG00000014313	15	35855641	35868001
Rgs22	ENSMUSG00000037627	15	35939234	36070155
Fbxo43	ENSMUSG00000048230	15	36079815	36094639
Polr2k	ENSMUSG00000045996	15	36103772	36106767
Spag1	ENSMUSG00000037617	15	36109123	36165365
Rnf19a	ENSMUSG00000022280	15	36169689	36212902
Rpl7a-ps3	ENSMUSG00000068579	15	36237857	36238722
Ankrd46	ENSMUSG00000048307	15	36407423	36426546
Snx31	ENSMUSG00000013611	15	36433817	36485328
Pabpc1	ENSMUSG00000022283	15	36525416	36538728
Ywhaz	ENSMUSG00000022285	15	36700525	36724302
Gm10384	ENSMUSG00000072618	15	36800256	36809571
Zfp706	ENSMUSG00000062397	15	36926786	36937157
Grhl2	ENSMUSG00000022286	15	37162791	37293324
Ncald	ENSMUSG00000051359	15	37295930	37722325
Gm18889	ENSMUSG00000092230	15	36049753	36050681
Gm16136	ENSMUSG00000089804	15	37161676	37163064
Gm16137	ENSMUSG00000089949	15	37172158	37172917
Gm16138	ENSMUSG00000089811	15	37261744	37262421
Gm16631	ENSMUSG00000086388	15	36937278	36973855
U6	ENSMUSG00000088201	15	36135015	36135077
7SK	ENSMUSG00000088786	15	35958653	35958907
Mir599	ENSMUSG00000076333	15	35590586	35590673
AC138604.1	ENSMUSG00000093021	15	36728453	36728526
U1	ENSMUSG00000064543	15	36099551	36099709
AC121814.1	ENSMUSG00000080408	15	37301077	37301202
Mir875	ENSMUSG00000077890	15	35590725	35590802
4930447A16Rik	ENSMUSG00000022288	15	37355309	37370399
Gm15941	ENSMUSG00000086992	15	37350889	37363169
Gm8668	ENSMUSG00000084316	15	37351003	37352449
Gm3267	ENSMUSG00000084382	15	37422511	37422983
Rrm2b	ENSMUSG00000022292	15	37853707	37891073
Ubr5	ENSMUSG00000037487	15	37897083	38008608
Odf1	ENSMUSG00000061923	15	38148958	38156490
Klf10	ENSMUSG00000037465	15	38221219	38230464
Azin1	ENSMUSG00000037458	15	38417185	38449021
Atp6v1c1	ENSMUSG00000022295	15	38591659	38622198
Baalc	ENSMUSG00000022296	15	38764688	38782810
Gm15942	ENSMUSG00000086125	15	37630459	37650608
Gm15940	ENSMUSG00000086313	15	37692587	37695156
Gm3362	ENSMUSG00000085442	15	37873082	37873547
Gm8705	ENSMUSG00000091728	15	38172915	38174731
Gm17721	ENSMUSG00000090879	15	38314736	38316055
Gm17265	ENSMUSG00000091397	15	38656628	38837731
U6atac	ENSMUSG00000080425	15	37533170	37533289
SNORA2	ENSMUSG00000065852	15	37988040	37988175
AC122459.1	ENSMUSG00000076032	15	38168327	38168435
Fzd6	ENSMUSG00000022297	15	38837879	38869732
Cthrc1	ENSMUSG00000054196	15	38908478	38918667
Slc25a32	ENSMUSG00000022299	15	38925737	38944262
Dcaf13	ENSMUSG00000022300	15	38944420	38978402
Rims2	ENSMUSG00000037386	15	39029878	39513486
n-R5s39	ENSMUSG00000084562	15	38977926	38978033
AC101886.1	ENSMUSG00000076029	15	39140016	39140124
SNORA17	ENSMUSG00000077470	15	38872125	38872255
Dcstamp	ENSMUSG00000022303	15	39577478	39592480
Dpys	ENSMUSG00000022304	15	39600031	39689016
Lrp12	ENSMUSG00000022305	15	39702149	39775540
Gm16291	ENSMUSG00000087695	15	39628591	39643923
AC152394.1	ENSMUSG00000092855	15	40017575	40017645
Zfpm2	ENSMUSG00000022306	15	40486588	40936138
Gm16294	ENSMUSG00000056332	15	40342868	40358823
Oxr1	ENSMUSG00000022307	15	41279028	41692594
4930555K19Rik	ENSMUSG00000048559	15	41005247	41005417
Abra	ENSMUSG00000042895	15	41696839	41701266
Gm16718	ENSMUSG00000086242	15	41589606	41620457
SNORA17	ENSMUSG00000088469	15	41780543	41780644
Angpt1	ENSMUSG00000022309	15	42256273	42508523
Rspo2	ENSMUSG00000051920	15	42852357	43002364
Eif3e	ENSMUSG00000022336	15	43081586	43114282
Gm10373	ENSMUSG00000072592	15	43262489	43308582
Ttc35	ENSMUSG00000022337	15	43308775	43359323
Tmem74	ENSMUSG00000054409	15	43698241	43701575
Gm17473	ENSMUSG00000091009	15	42507806	42536162
U7	ENSMUSG00000088831	15	43504110	43504173
7SK	ENSMUSG00000087905	15	43056171	43056466
Trhr	ENSMUSG00000038760	15	44027681	44067458
Nudcd1	ENSMUSG00000038736	15	44206773	44259853
Eny2	ENSMUSG00000022338	15	44259657	44269231
Pkhd1l1	ENSMUSG00000038725	15	44289099	44428689
Ebag9	ENSMUSG00000022339	15	44451187	44472570
Sybu	ENSMUSG00000022340	15	44503405	44619609
2310069G16Rik	ENSMUSG00000085947	15	44619328	44637373
SNORA17	ENSMUSG00000088756	15	44177196	44177321
U6	ENSMUSG00000065855	15	44264141	44264247
SNORA17	ENSMUSG00000077181	15	44195631	44195762
A930017M01Rik	ENSMUSG00000090446	15	44715020	44715856
A930017M01Rik	ENSMUSG00000060530	15	44712926	44714601
SNORA48	ENSMUSG00000089589	15	44779650	44779792
U6	ENSMUSG00000089137	15	44772088	44772181
Gm5471	ENSMUSG00000058463	15	44803340	44803681
[truncated: 197 more rows]

## Sheet: Venn
											26 common elements in "DT", "PT", "FHA" and "Prn":
											ENSMUSG00000039138	4930591A17Rik
											ENSMUSG00000000305	Cdh4
											ENSMUSG00000082215	Gm14314
											ENSMUSG00000061897	Gm14292
											ENSMUSG00000081481	Gm14293
											ENSMUSG00000081882	Gm14294
											ENSMUSG00000083410	Gm14300
											ENSMUSG00000042408	Zmym6
											ENSMUSG00000070737	Gm12942
											ENSMUSG00000042388	Dlgap3
											ENSMUSG00000042380	BC003266
											ENSMUSG00000082220	Gm12943
											ENSMUSG00000088982	U6
											ENSMUSG00000087987	U6
											ENSMUSG00000024054	Smchd1
											ENSMUSG00000024056	Ndc80
											ENSMUSG00000052525	Spdya
											ENSMUSG00000041057	Wdr43
											ENSMUSG00000085916	Gm16724
											ENSMUSG00000085492	Trmt61b
											ENSMUSG00000091831	Gm4707
											ENSMUSG00000079356	Mettl4-ps1
											ENSMUSG00000093289	Snord92
											ENSMUSG00000089105	5S_rRNA
											ENSMUSG00000092887	Snord53
											ENSMUSG00000092713	CT010429.1
