# Supplementary material for: Genetic Variation in the Magnitude and Longevity of the IgG Subclass Response to a Diphtheria-Tetanus-Acellular Pertussis (DTaP) Vaccine in Mice
Source: Vaccines (Basel). 2019 Sep 20;7(4):124. doi: 10.3390/vaccines7040124 (PMC6963843; doi:10.3390/vaccines7040124)
Supplement: Supplementary file 1 [file vaccines-07-00124-s001.zip › Supplemental Data/w14IgG1to3_genelist.xlsx]

## Sheet: w14IgG1to3DT_genelist
Gene Name	Ensembl Gene ID	Chromosome	Start	End
Kcnq5	ENSMUSG00000028033	1	21388484	21952023												95 common elements in "DT" and "Prn":
Rims1	ENSMUSG00000041670	1	22276332	22911673												ENSMUSG00000028793	#N/A
4933415F23Rik	ENSMUSG00000073730	1	23107312	23109092												ENSMUSG00000028786	#N/A
Gm6420	ENSMUSG00000073729	1	23262826	23263245												ENSMUSG00000028785	#N/A
Ogfrl1	ENSMUSG00000026158	1	23373263	23390014												ENSMUSG00000001334	#N/A
Gm16705	ENSMUSG00000085163	1	21949923	21952611												ENSMUSG00000040928	#N/A
Mir30a	ENSMUSG00000065405	1	23279108	23279178												ENSMUSG00000028811	#N/A
Mir30c-2	ENSMUSG00000065567	1	23298540	23298623												ENSMUSG00000050390	#N/A
SNORA17	ENSMUSG00000089553	1	23252050	23252170												ENSMUSG00000001333	#N/A
Prim2	ENSMUSG00000026134	1	33510656	33726631												ENSMUSG00000057236	#N/A
1700001G17Rik	ENSMUSG00000044744	1	33726688	33727557												ENSMUSG00000057572	#N/A
Rab23	ENSMUSG00000004768	1	33776727	33799409												ENSMUSG00000028807	#N/A
Bag2	ENSMUSG00000042215	1	33802329	33814639												ENSMUSG00000085085	#N/A
Zfp451	ENSMUSG00000042197	1	33817317	33871440												ENSMUSG00000087416	#N/A
Bend6	ENSMUSG00000042182	1	33908897	33964661												ENSMUSG00000087575	#N/A
Dst	ENSMUSG00000026131	1	33965125	34365495												ENSMUSG00000082468	#N/A
Gm11158	ENSMUSG00000079617	1	34428991	34460294												ENSMUSG00000091673	#N/A
Ccdc115	ENSMUSG00000042111	1	34493516	34496517												ENSMUSG00000088921	#N/A
Imp4	ENSMUSG00000026127	1	34496696	34502581												ENSMUSG00000093163	#N/A
Ptpn18	ENSMUSG00000026126	1	34516591	34532499												ENSMUSG00000048485	#N/A
Prss39	ENSMUSG00000026125	1	34555275	34559907												ENSMUSG00000040859	#N/A
Cfc1	ENSMUSG00000026124	1	34592493	34601156												ENSMUSG00000064613	#N/A
Prss40	ENSMUSG00000037529	1	34600820	34617788												ENSMUSG00000000411	#N/A
1700101I19Rik	ENSMUSG00000045815	1	34636069	34636458												ENSMUSG00000078554	#N/A
Fam123c	ENSMUSG00000045174	1	34636538	34647783												ENSMUSG00000086336	#N/A
Arhgef4	ENSMUSG00000037509	1	34778769	34870154												ENSMUSG00000047945	#N/A
Fam168b	ENSMUSG00000037503	1	34870064	34899910												ENSMUSG00000028800	#N/A
Plekhb2	ENSMUSG00000026123	1	34906804	34936425												ENSMUSG00000000409	#N/A
Gm16750	ENSMUSG00000085306	1	34222701	34235118												ENSMUSG00000050493	#N/A
Gm15455	ENSMUSG00000081402	1	33892744	33895759												ENSMUSG00000028798	#N/A
C230030N03Rik	ENSMUSG00000089955	1	34735033	34781146												ENSMUSG00000028797	#N/A
C230030N03Rik	ENSMUSG00000046858	1	34779929	34780877												ENSMUSG00000078552	#N/A
SNORA17	ENSMUSG00000077231	1	35235801	35235929												ENSMUSG00000040795	#N/A
Mir5103	ENSMUSG00000092852	1	34489966	34490044												ENSMUSG00000028795	#N/A
U6	ENSMUSG00000084506	1	34038255	34038347												ENSMUSG00000053841	#N/A
Hs6st1	ENSMUSG00000045216	1	36125245	36163291												ENSMUSG00000003731	#N/A
Uggt1	ENSMUSG00000037470	1	36198375	36301150												ENSMUSG00000053730	#N/A
Neurl3	ENSMUSG00000047180	1	36321447	36330270												ENSMUSG00000028790	#N/A
Arid5a	ENSMUSG00000037447	1	36364578	36380874												ENSMUSG00000028788	#N/A
4632411B12Rik	ENSMUSG00000010453	1	36392575	36426026												ENSMUSG00000086797	#N/A
Lman2l	ENSMUSG00000001143	1	36478910	36502116												ENSMUSG00000080944	#N/A
Cnnm4	ENSMUSG00000037408	1	36528442	36565621												ENSMUSG00000073753	#N/A
Cnnm3	ENSMUSG00000001138	1	36568712	36585082												ENSMUSG00000070729	#N/A
Ankrd23	ENSMUSG00000067653	1	36587379	36592584												ENSMUSG00000086369	#N/A
Ankrd39	ENSMUSG00000079610	1	36595018	36604046												ENSMUSG00000065768	#N/A
Sema4c	ENSMUSG00000026121	1	36605487	36615194												ENSMUSG00000028784	#N/A
Fam178b	ENSMUSG00000046337	1	36619539	36740028												ENSMUSG00000028782	#N/A
Fer1l5	ENSMUSG00000037432	1	36473733	36478955												ENSMUSG00000085389	#N/A
D430040D24Rik	ENSMUSG00000087589	1	36615204	36622458												ENSMUSG00000085517	#N/A
Gm6428	ENSMUSG00000089906	1	36658647	36658991												ENSMUSG00000040690	#N/A
U6	ENSMUSG00000064601	1	35818447	35818551												ENSMUSG00000028779	#N/A
Cox5b	ENSMUSG00000061518	1	36748332	36750230												ENSMUSG00000028778	#N/A
Actr1b	ENSMUSG00000037351	1	36756047	36771267												ENSMUSG00000028776	#N/A
Zap70	ENSMUSG00000026117	1	36818695	36839663												ENSMUSG00000023120	#N/A
Tmem131	ENSMUSG00000026116	1	36849036	36996372												ENSMUSG00000023232	#N/A
AC084389.1	ENSMUSG00000077939	1	36720810	36720884												ENSMUSG00000073752	#N/A
Rpl12-ps1	ENSMUSG00000080054	1	37014738	37015362												ENSMUSG00000028773	#N/A
Vwa3b	ENSMUSG00000050122	1	37083441	37133841												ENSMUSG00000028772	#N/A
n-R5s210	ENSMUSG00000070201	1	37062284	37062402												ENSMUSG00000074088	#N/A
Tmeff2	ENSMUSG00000026109	1	50957491	51244114												ENSMUSG00000078532	#N/A
Sdpr	ENSMUSG00000045954	1	51345970	51359803												ENSMUSG00000079884	#N/A
AC098743.1	ENSMUSG00000092906	1	51072157	51072257												ENSMUSG00000053889	#N/A
7SK	ENSMUSG00000084531	1	50616606	50616919												ENSMUSG00000070315	#N/A
Epha4	ENSMUSG00000026235	1	77363760	77511663												ENSMUSG00000086984	#N/A
5S_rRNA	ENSMUSG00000089326	1	77141328	77141421												ENSMUSG00000061932	#N/A
U1	ENSMUSG00000065215	1	77894858	77895021												ENSMUSG00000032036	#N/A
Pax3	ENSMUSG00000004872	1	78097842	78193709												ENSMUSG00000032038	#N/A
Sgpp2	ENSMUSG00000032908	1	78306921	78416861												ENSMUSG00000032040	#N/A
Farsb	ENSMUSG00000026245	1	78414533	78485434												ENSMUSG00000032041	#N/A
BC035947	ENSMUSG00000090486	1	78494381	78508538												ENSMUSG00000032042	#N/A
Mogat1	ENSMUSG00000012187	1	78507566	78534748												ENSMUSG00000039048	#N/A
Acsl3	ENSMUSG00000032883	1	78654400	78703562												ENSMUSG00000050471	#N/A
Utp14b	ENSMUSG00000079470	1	78654613	78664163												ENSMUSG00000032044	#N/A
Kcne4	ENSMUSG00000047330	1	78813502	78816599												ENSMUSG00000066771	#N/A
Gm5830	ENSMUSG00000072978	1	78964212	78964654												ENSMUSG00000038119	#N/A
Pign	ENSMUSG00000056536	1	107417716	107555585												ENSMUSG00000032101	#N/A
2310035C23Rik	ENSMUSG00000026319	1	107560438	107651708												ENSMUSG00000032103	#N/A
Tnfrsf11a	ENSMUSG00000026321	1	107677300	107744558												ENSMUSG00000050555	#N/A
Zcchc2	ENSMUSG00000038866	1	107886983	107930651												ENSMUSG00000074452	#N/A
Phlpp1	ENSMUSG00000044340	1	108068329	108290827												ENSMUSG00000032099	#N/A
Bcl2	ENSMUSG00000057329	1	108434755	108610851												ENSMUSG00000090858	#N/A
Kdsr	ENSMUSG00000009905	1	108616987	108656319												ENSMUSG00000091215	#N/A
Vps4b	ENSMUSG00000009907	1	108660648	108693305												ENSMUSG00000091603	#N/A
Serpinb5	ENSMUSG00000067006	1	108757750	108779925												ENSMUSG00000065934	#N/A
Serpinb12	ENSMUSG00000059956	1	108831026	108853657												ENSMUSG00000088605	#N/A
Serpinb13	ENSMUSG00000048775	1	108877561	108897772												ENSMUSG00000089465	#N/A
Serpinb3a	ENSMUSG00000044594	1	108942164	108948914												ENSMUSG00000088056	#N/A
Serpinb3d	ENSMUSG00000058017	1	108974744	108980083												ENSMUSG00000088905	#N/A
Serpinb3b	ENSMUSG00000073602	1	109050517	109174938												ENSMUSG00000091174	#N/A
Serpinb3c	ENSMUSG00000073601	1	109167778	109174948												ENSMUSG00000090738	#N/A
Serpinb11	ENSMUSG00000026327	1	109258506	109277052												ENSMUSG00000032108	#N/A
Serpinb7	ENSMUSG00000067001	1	109296232	109349266												ENSMUSG00000047980	#N/A
Gm3608	ENSMUSG00000067017	1	107352560	107353433												ENSMUSG00000078934	#N/A
Gm10193	ENSMUSG00000067015	1	107661021	107661251												ENSMUSG00000020644	#N/A
D630008O14Rik	ENSMUSG00000054006	1	108438520	108471622												ENSMUSG00000020642	#N/A
Pou2f3-rs1	ENSMUSG00000083613	1	108784429	108785474												ENSMUSG00000089441	#N/A
Gm8080	ENSMUSG00000084228	1	108916714	108921902
Gm15388	ENSMUSG00000083884	1	109034421	109035146
Gm8084	ENSMUSG00000080729	1	109088052	109090134
Gm15390	ENSMUSG00000081114	1	109150130	109150867
Gm8089	ENSMUSG00000084189	1	109186918	109198931
Gm15391	ENSMUSG00000087210	1	109281777	109283989
AC132082.1	ENSMUSG00000076999	1	107471264	107471359
U6	ENSMUSG00000089206	1	107842131	107842237
SNORA17	ENSMUSG00000089278	1	109336624	109336754
Serpinb2	ENSMUSG00000062345	1	109408000	109432055
Serpinb10-ps	ENSMUSG00000092572	1	109425580	109445848
Serpinb8	ENSMUSG00000026315	1	109486583	109505486
Gm15389	ENSMUSG00000086161	1	109583585	109590091
SNORA17	ENSMUSG00000077237	1	109789551	109789682
U6	ENSMUSG00000064683	1	109653179	109653285
Cdh7	ENSMUSG00000026312	1	111878904	112036734
SNORA17	ENSMUSG00000089037	1	111519585	111519714
7SK	ENSMUSG00000084741	1	111701337	111701621
Cdh19	ENSMUSG00000047216	1	112785772	112873949
Dsel	ENSMUSG00000038702	1	113755279	113761486
Cdc73	ENSMUSG00000026361	1	145445927	145550023
Cdc73	ENSMUSG00000078284	1	145452292	145453738
B3galt2	ENSMUSG00000033849	1	145487794	145497536
Glrx2	ENSMUSG00000018196	1	145586159	145596806
Trove2	ENSMUSG00000018199	1	145597920	145624198
Uchl5	ENSMUSG00000018189	1	145624408	145654596
Rgs2	ENSMUSG00000026360	1	145846468	145851291
Rgs13	ENSMUSG00000051079	1	145985797	146024502
Rgs1	ENSMUSG00000026358	1	146091102	146096372
Rgs21	ENSMUSG00000091758	1	146366820	146388442
Gm6397	ENSMUSG00000089640	1	145530360	145531428
snoU109	ENSMUSG00000088323	1	145626058	145626192
Ier5	ENSMUSG00000056708	1	156943497	156946766
Mr1	ENSMUSG00000026471	1	156975008	156993910
Stx6	ENSMUSG00000026470	1	157005833	157050647
BC034090	ENSMUSG00000033722	1	157059603	157079870
Xpr1	ENSMUSG00000026469	1	157122831	157264545
Acbd6	ENSMUSG00000033701	1	157405250	157534363
Lhx4	ENSMUSG00000026468	1	157545166	157589250
Qsox1	ENSMUSG00000033684	1	157625285	157660013
Cep350	ENSMUSG00000033671	1	157692096	157820020
Tor1aip1	ENSMUSG00000026466	1	157851729	157883610
Tor1aip2	ENSMUSG00000050565	1	157882533	157915991
Tor1aip2	ENSMUSG00000079252	1	157882856	157900866
Fam163a	ENSMUSG00000015484	1	157923096	158135156
Nphs2	ENSMUSG00000026602	1	158240858	158258166
9430070O13Rik	ENSMUSG00000026601	1	158295060	158330121
Gm2000	ENSMUSG00000078193	1	158296169	158296613
Soat1	ENSMUSG00000026600	1	158358239	158404459
Abl2	ENSMUSG00000026596	1	158488917	158579699
Tor3a	ENSMUSG00000060519	1	158583748	158604487
Fam20b	ENSMUSG00000033557	1	158608676	158649132
Ralgps2	ENSMUSG00000026594	1	158734297	158869757
Angptl1	ENSMUSG00000033544	1	158768693	158791209
Gm9530	ENSMUSG00000086217	1	156910653	156930396
Gm5532	ENSMUSG00000073535	1	157367303	157374241
Tdrd5	ENSMUSG00000060985	1	158185426	158233795
Gm10031	ENSMUSG00000057808	1	158454362	158455283
Gm15428	ENSMUSG00000046057	1	158723643	158723975
U2	ENSMUSG00000077419	1	157801704	157801852
AC116712.1	ENSMUSG00000093286	1	157163096	157163219
1700057K13Rik	ENSMUSG00000026592	1	159029279	159038811
Rasal2	ENSMUSG00000070565	1	159065314	159342726
2810025M15Rik	ENSMUSG00000049881	1	159342483	159350366
Gm6058	ENSMUSG00000087632	1	159314062	159314460
BC026585	ENSMUSG00000033488	1	159388711	159419191
Gm15486	ENSMUSG00000087093	1	159428006	159441852
Sec16b	ENSMUSG00000026589	1	159436859	159498556
Fam5b	ENSMUSG00000004031	1	160175402	160286391
Astn1	ENSMUSG00000026587	1	160292471	160621917
Mir488	ENSMUSG00000070103	1	160435756	160435864
Pappa2	ENSMUSG00000073530	1	160641862	160887870
Prkcq	ENSMUSG00000026778	2	11093740	11222853
Pfkfb3	ENSMUSG00000026773	2	11393057	11423728
Rbm17	ENSMUSG00000037197	2	11507066	11525780
Gm17355	ENSMUSG00000091689	2	11546914	11546967
Gm17490	ENSMUSG00000091312	2	11547233	11547891
Il2ra	ENSMUSG00000026770	2	11564419	11614818
Il15ra	ENSMUSG00000023206	2	11626914	11655613
Fbxo18	ENSMUSG00000058594	2	11664200	11699209
Ankrd16	ENSMUSG00000047909	2	11699503	11711952
Itga8	ENSMUSG00000026768	2	12028259	12223547
Fam188a	ENSMUSG00000026767	2	12268890	12341096
Pter	ENSMUSG00000026730	2	12845668	12925080
Gm13264	ENSMUSG00000085257	2	10958501	10970693
Gm13297	ENSMUSG00000081693	2	11012506	11013391
Gm13294	ENSMUSG00000083900	2	11021415	11021891
Gm13293	ENSMUSG00000086006	2	11261116	11264239
Gm13295	ENSMUSG00000080905	2	11274141	11274396
Gm13291	ENSMUSG00000086491	2	11306630	11308691
Gm13292	ENSMUSG00000082424	2	11330657	11331658
Gm13296	ENSMUSG00000082314	2	11341849	11342863
Gm13260	ENSMUSG00000082727	2	11529041	11529909
Gm13310	ENSMUSG00000080801	2	12004239	12005630
E030013I19Rik	ENSMUSG00000086843	2	12222574	12232927
Gm13321	ENSMUSG00000083547	2	12343252	12343650
SNORA68	ENSMUSG00000089007	2	10936389	10936517
U4	ENSMUSG00000084560	2	11009408	11009540
C1ql3	ENSMUSG00000049630	2	12925084	12933374
U3	ENSMUSG00000089566	2	12901131	12901238
Rsu1	ENSMUSG00000026727	2	12998594	13193058
Cubn	ENSMUSG00000026726	2	13197965	13413551
Gm13270	ENSMUSG00000086358	2	13193229	13246418
H2afb1	ENSMUSG00000062651	2	17918049	17918573
A930004D18Rik	ENSMUSG00000054057	2	17946820	17959364
2810030E01Rik	ENSMUSG00000054074	2	17962303	17970678
Mllt10	ENSMUSG00000026743	2	17976898	18134017
Dnajc1	ENSMUSG00000026740	2	18117281	18314457
Commd3	ENSMUSG00000051154	2	18594011	18597858
Bmi1	ENSMUSG00000026739	2	18598645	18608256
Gm13334	ENSMUSG00000087182	2	18615659	18620664
BC061194	ENSMUSG00000037708	2	18620628	18672040
Pip4k2a	ENSMUSG00000026737	2	18763882	18919753
4930426L09Rik	ENSMUSG00000026736	2	18919970	18921428
Armc3	ENSMUSG00000037683	2	19120745	19231868
Msrb2	ENSMUSG00000023094	2	19293067	19316603
Ptf1a	ENSMUSG00000026735	2	19367290	19369128
4921504E06Rik	ENSMUSG00000026734	2	19384464	19475541
Otud1	ENSMUSG00000043415	2	19579689	19582217
Gm13329	ENSMUSG00000081116	2	17919868	17920132
Gm13330	ENSMUSG00000085319	2	17954160	17961260
1810059C17Rik	ENSMUSG00000086340	2	17975820	17978240
Gm13351	ENSMUSG00000081619	2	18100656	18101069
Gm13350	ENSMUSG00000083070	2	18170992	18171470
Gm13349	ENSMUSG00000082520	2	18260206	18260616
Gm13354	ENSMUSG00000082742	2	18415996	18416164
Gm13353	ENSMUSG00000081181	2	18489753	18489825
Gm13355	ENSMUSG00000082943	2	18563413	18563729
Gm13352	ENSMUSG00000086882	2	18570712	18570973
Gm20539	ENSMUSG00000092353	2	18664342	18682489
Gm13333	ENSMUSG00000081139	2	18680611	18681391
Gm13332	ENSMUSG00000083281	2	19023328	19024725
4930447M23Rik	ENSMUSG00000087674	2	19265944	19272677
Gm13344	ENSMUSG00000087103	2	19350731	19353610
Gm13336	ENSMUSG00000085388	2	19363135	19368301
1810010K12Rik	ENSMUSG00000056329	2	19373455	19376622
Gm13345	ENSMUSG00000084160	2	19430717	19430944
Gm13348	ENSMUSG00000086621	2	19555661	19558613
Gm13343	ENSMUSG00000080227	2	19573871	19573975
Gm13346	ENSMUSG00000087246	2	19598338	19607784
Gm13347	ENSMUSG00000083893	2	19598878	19600230
SNORA17	ENSMUSG00000077342	2	19612915	19613046
AL928557.1	ENSMUSG00000092814	2	18051079	18051204
U6	ENSMUSG00000064964	2	18080314	18080418
Etl4	ENSMUSG00000036617	2	19831407	20732340
Gm13361	ENSMUSG00000083777	2	19887594	19889024
Gm13363	ENSMUSG00000060795	2	19914548	19915069
Gm13360	ENSMUSG00000082164	2	19958723	19959521
SNORA32	ENSMUSG00000065644	2	19856490	19856580
Gm13328	ENSMUSG00000081128	2	20156672	20157691
Gm17171	ENSMUSG00000091457	2	20222444	20246297
U6	ENSMUSG00000065253	2	20202146	20202252
Gm13335	ENSMUSG00000085477	2	20342197	20354561
Arhgap21	ENSMUSG00000036591	2	20769546	20890508
Gm13362	ENSMUSG00000086418	2	20631002	20634861
Gm13380	ENSMUSG00000085206	2	20843487	20853016
Gm13375	ENSMUSG00000075514	2	20890681	20891624
Gm13377	ENSMUSG00000086821	2	20966435	21063581
Gm13376	ENSMUSG00000087219	2	21018726	21042286
Enkur	ENSMUSG00000026679	2	21102358	21126992
Thnsl1	ENSMUSG00000048550	2	21127351	21136636
Gpr158	ENSMUSG00000045967	2	21289169	21752174
Gm13378	ENSMUSG00000084071	2	21165732	21166067
Gm13327	ENSMUSG00000085680	2	21263552	21290738
5S_rRNA	ENSMUSG00000089472	2	21092710	21092840
7SK	ENSMUSG00000089576	2	21119317	21119493
Grb14	ENSMUSG00000026888	2	64750533	64863044
Cobll1	ENSMUSG00000034903	2	64926396	65077460
Slc38a11	ENSMUSG00000061171	2	65154487	65202091
Scn3a	ENSMUSG00000057182	2	65295175	65405684
Scn2a1	ENSMUSG00000075318	2	65458914	65605504
Csrnp3	ENSMUSG00000044647	2	65683824	65869603
Galnt3	ENSMUSG00000026994	2	65920823	65963051
Ttc21b	ENSMUSG00000034848	2	66022384	66094674
Scn1a	ENSMUSG00000064329	2	66108838	66278897
Scn9a	ENSMUSG00000075316	2	66318137	66473009
Gm13578	ENSMUSG00000084104	2	64706056	64706645
Gm13594	ENSMUSG00000086881	2	65076813	65077732
Gm13592	ENSMUSG00000083707	2	65115474	65116483
Gm13593	ENSMUSG00000080766	2	65134235	65135426
Gm13595	ENSMUSG00000086701	2	65347322	65350662
Gm13619	ENSMUSG00000052865	2	65690465	65698676
Gm13617	ENSMUSG00000085160	2	65782356	65792127
Gm13616	ENSMUSG00000080728	2	65983711	65983932
Gm13618	ENSMUSG00000086671	2	66025893	66030870
Gm13630	ENSMUSG00000085386	2	66247551	66259645
Gm13629	ENSMUSG00000087301	2	66278937	66384083
Rpl35-ps1	ENSMUSG00000080855	2	66285093	66285464
Gm13627	ENSMUSG00000081307	2	66367471	66368803
SNORA17	ENSMUSG00000088197	2	65214226	65214339
7SK	ENSMUSG00000088994	2	66440572	66440855
SNORD26	ENSMUSG00000088306	2	65966189	65966268
Cdh4	ENSMUSG00000000305	2	179177136	179634078
Gm10711	ENSMUSG00000074518	2	179628614	179629398
Taf4a	ENSMUSG00000039117	2	179646851	179711351
Lsm14b	ENSMUSG00000039108	2	179759692	179770170
Psma7	ENSMUSG00000027566	2	179771078	179777138
Ss18l1	ENSMUSG00000039086	2	179777214	179804906
Gtpbp5	ENSMUSG00000039069	2	179805293	179820607
Hrh3	ENSMUSG00000039059	2	179834170	179839193
Osbpl2	ENSMUSG00000039050	2	179854011	179897385
Adrm1	ENSMUSG00000039041	2	179906190	179910991
Lama5	ENSMUSG00000015647	2	179911078	179960564
Rps21	ENSMUSG00000039001	2	179992082	179993150
Cables2	ENSMUSG00000038990	2	179993245	180008201
BC066135	ENSMUSG00000038980	2	180012351	180024584
Gata5	ENSMUSG00000015627	2	180059838	180069404
Gm14318	ENSMUSG00000056061	2	180067562	180075437
Slco4a1	ENSMUSG00000038963	2	180190950	180209572
Ntsr1	ENSMUSG00000027568	2	180234681	180279685
1600027N09Rik	ENSMUSG00000027569	2	180316009	180321009
Ogfr	ENSMUSG00000049401	2	180323950	180330541
Col9a3	ENSMUSG00000027570	2	180332495	180356894
Tcfl5	ENSMUSG00000038932	2	180356661	180377413
Dido1	ENSMUSG00000038914	2	180392669	180444704
2310003C23Rik	ENSMUSG00000027573	2	180444822	180453438
Slc17a9	ENSMUSG00000023393	2	180459968	180476985
Bhlhe23	ENSMUSG00000045493	2	180509086	180511605
Ythdf1	ENSMUSG00000038848	2	180639082	180655654
Birc7	ENSMUSG00000038840	2	180663728	180668715
Nkain4	ENSMUSG00000027574	2	180669477	180689404
Arfgap1	ENSMUSG00000027575	2	180701930	180717231
9230112E08Rik	ENSMUSG00000070461	2	180718937	180720296
Col20a1	ENSMUSG00000016356	2	180721240	180752245
Chrna4	ENSMUSG00000027577	2	180753085	180778251
Kcnq2	ENSMUSG00000016346	2	180810284	180869996
Eef1a2	ENSMUSG00000016349	2	180882358	180891719
Ppdpf	ENSMUSG00000016344	2	180921952	180923476
Ptk6	ENSMUSG00000038751	2	180928426	180937494
Srms	ENSMUSG00000027579	2	180940267	180947890
BC051628	ENSMUSG00000047841	2	180954718	180957559
BC006779	ENSMUSG00000027580	2	180962320	180976732
Gmeb2	ENSMUSG00000038705	2	180986154	181022740
Stmn3	ENSMUSG00000027581	2	181041164	181049205
Rtel1	ENSMUSG00000038685	2	181054444	181091321
Arfrp1	ENSMUSG00000038671	2	181092395	181100109
Zgpat	ENSMUSG00000027582	2	181099633	181118333
Lime1	ENSMUSG00000090077	2	181114783	181118333
Zbtb46	ENSMUSG00000027583	2	181122467	181194131
Abhd16b	ENSMUSG00000055882	2	181227911	181229685
Tpd52l2	ENSMUSG00000000827	2	181231847	181252671
Dnajc5	ENSMUSG00000000826	2	181255190	181289838
Uckl1	ENSMUSG00000089917	2	181303854	181319597
Znf512b	ENSMUSG00000000823	2	181316808	181327508
Prpf6	ENSMUSG00000002455	2	181326573	181390365
Samd10	ENSMUSG00000038605	2	181329923	181333917
Gm14300	ENSMUSG00000083410	2	179347327	179348272
4921531C22Rik	ENSMUSG00000085704	2	179710698	179713718
Gm14299	ENSMUSG00000082850	2	179727893	179728289
Gm17180	ENSMUSG00000090589	2	179834618	179836207
B230312C02Rik	ENSMUSG00000084843	2	180105196	180120590
Gm14343	ENSMUSG00000087550	2	180500919	180510108
Gm14340	ENSMUSG00000074507	2	180553048	180559335
Gm14342	ENSMUSG00000086166	2	180564195	180624365
Gm14344	ENSMUSG00000085428	2	180571186	180583619
Gm14339	ENSMUSG00000085728	2	180582357	180583751
Gm14341	ENSMUSG00000087293	2	180689169	180701517
Gm14398	ENSMUSG00000083993	2	180951432	180952504
Gm14447	ENSMUSG00000084033	2	181026853	181027640
Slc2a4rg-ps	ENSMUSG00000085028	2	181118955	181122291
Gm16119	ENSMUSG00000010492	2	181313185	181319875
U1	ENSMUSG00000088378	2	181247255	181247417
U6	ENSMUSG00000089612	2	181160640	181160742
Mir3091	ENSMUSG00000092827	2	179992241	179992316
Mir124a-3	ENSMUSG00000065454	2	180628736	180628822
HAR1F	ENSMUSG00000088334	2	180572532	180572663
U6	ENSMUSG00000084696	2	180918217	180918320
AL663067.1	ENSMUSG00000080507	2	179725502	179725587
U6	ENSMUSG00000064422	2	180432768	180432874
Mir133a-2	ENSMUSG00000065460	2	180133084	180133187
Mir1a-1	ENSMUSG00000070144	2	180123753	180123829
Sox18	ENSMUSG00000046470	2	181404541	181406345
Tcea2	ENSMUSG00000059540	2	181415015	181422776
Rgs19	ENSMUSG00000002458	2	181423124	181428682
4930526D03Rik	ENSMUSG00000045794	2	181431498	181433147
Oprl1	ENSMUSG00000027584	2	181449721	181455690
Myt1	ENSMUSG00000010505	2	181498037	181562502
Gm14489	ENSMUSG00000082786	2	181458747	181459647
U6	ENSMUSG00000077518	2	181397011	181397117
Pcmtd2	ENSMUSG00000027589	2	181572559	181592166
Polr3k	ENSMUSG00000038628	2	181599042	181605535
Gm14496	ENSMUSG00000053277	2	181725841	181731135
Gm5466	ENSMUSG00000083397	2	181631528	181633417
Rps24-ps2	ENSMUSG00000069125	3	3791897	3792295
Gm8775	ENSMUSG00000091223	3	4211716	4212228
Hnf4g	ENSMUSG00000017688	3	3508030	3659775
AC122735.1	ENSMUSG00000077995	3	4355004	4355096
AC167016.1	ENSMUSG00000092742	3	4305193	4305293
n-R5s194	ENSMUSG00000077912	3	4338998	4339116
SNORA38	ENSMUSG00000089287	3	4567203	4567335
AC107454.1	ENSMUSG00000077829	3	3555465	3555556
2700069I18Rik	ENSMUSG00000086224	3	5177586	5220841
Gm17308	ENSMUSG00000091773	3	5090276	5094776
Gm10748	ENSMUSG00000074728	3	5212838	5215209
Zfhx4	ENSMUSG00000025255	3	5218526	5415855
4930555M17Rik	ENSMUSG00000093557	3	5512995	5515333
Pxmp3	ENSMUSG00000040374	3	5560188	5576239
AC124080.1	ENSMUSG00000077066	3	6338882	6338991
1700008P02Rik	ENSMUSG00000069118	3	6615413	6620443
Pkia	ENSMUSG00000027499	3	7366604	7445366
SNORA17	ENSMUSG00000089220	3	6977268	6977380
Fam164a	ENSMUSG00000043542	3	7503426	7553848
SNORA17	ENSMUSG00000088484	3	7501904	7502020
Il7	ENSMUSG00000040329	3	7572036	7613722
Gm16685	ENSMUSG00000086143	3	7612705	7690001
Gm16337	ENSMUSG00000089794	3	9757607	9786142
Chmp4c	ENSMUSG00000027536	3	10366907	10391005
C030034L19Rik	ENSMUSG00000085362	3	9403064	9437233
Snx16	ENSMUSG00000027534	3	10417819	10440124
Zbtb10	ENSMUSG00000069114	3	9250602	9285333
Zfp704	ENSMUSG00000040209	3	9427011	9610085
Pag1	ENSMUSG00000027508	3	9687479	9833679
Fabp5	ENSMUSG00000027533	3	10012548	10016607
Gm9833	ENSMUSG00000049230	3	10088173	10092564
Pmp2	ENSMUSG00000052468	3	10179851	10183885
Fabp9	ENSMUSG00000027528	3	10193626	10197222
Fabp4	ENSMUSG00000062515	3	10204347	10208576
Fabp12	ENSMUSG00000027530	3	10244209	10301183
Impa1	ENSMUSG00000027531	3	10313540	10331439
Slc10a5	ENSMUSG00000058921	3	10331734	10335656
Zfand1	ENSMUSG00000039795	3	10339953	10351317
7SK	ENSMUSG00000088229	3	9402175	9402485
5S_rRNA	ENSMUSG00000088004	3	9829620	9829728
SNORA17	ENSMUSG00000087858	3	10975469	10975586
Gm8910	ENSMUSG00000069106	3	11013518	11015193
AC127294.1	ENSMUSG00000093022	3	11154337	11154437
Gm8935	ENSMUSG00000045699	3	12855996	12856403
Gm2464	ENSMUSG00000078587	3	13471906	13474596
Rsrc1	ENSMUSG00000034544	3	66785312	67162318
Gm17402	ENSMUSG00000090408	3	67169383	67179085
Mlf1	ENSMUSG00000048416	3	67178019	67203925
Gfm1	ENSMUSG00000027774	3	67234018	67280451
Lxn	ENSMUSG00000047557	3	67261920	67267848
Rarres1	ENSMUSG00000049404	3	67282894	67319445
Mfsd1	ENSMUSG00000027775	3	67386690	67408153
Iqcj	ENSMUSG00000051777	3	67696142	67860515
Schip1	ENSMUSG00000027777	3	67868864	68430404
Gm5848	ENSMUSG00000068979	3	68112747	68113103
Il12a	ENSMUSG00000027776	3	68494566	68502469
Gm17641	ENSMUSG00000091272	3	68671839	68674188
1110032F04Rik	ENSMUSG00000046999	3	68673508	68676085
Ift80	ENSMUSG00000027778	3	68696421	68808492
Smc4	ENSMUSG00000034349	3	68808660	68838545
Trim59	ENSMUSG00000034317	3	68839210	68848677
Kpna4	ENSMUSG00000027782	3	68871071	68931035
Ppm1l	ENSMUSG00000027784	3	69120783	69364724
Gm10040	ENSMUSG00000058360	3	68537059	68541999
RP24-399B3.3	ENSMUSG00000093384	3	68704093	68704371
RP24-399B3.4	ENSMUSG00000093730	3	68705752	68706066
Gm18588	ENSMUSG00000093402	3	68706189	68706680
RP24-399B3.1	ENSMUSG00000093505	3	68707742	68708074
Arl14	ENSMUSG00000027783	3	69026341	69027538
Gm17214	ENSMUSG00000091315	3	69123967	69124507
Mir16-2	ENSMUSG00000065606	3	68813824	68813918
U2	ENSMUSG00000084617	3	68351442	68351630
SNORA17	ENSMUSG00000077459	3	67377082	67377213
snoU90	ENSMUSG00000089417	3	68889027	68889369
Mir15b	ENSMUSG00000065580	3	68813678	68813775
Gm17212	ENSMUSG00000090941	3	69139424	69139682
B3galnt1	ENSMUSG00000043300	3	69378108	69402783
Rpl32-ps	ENSMUSG00000068969	3	69520908	69521315
Nmd3	ENSMUSG00000027787	3	69525907	69552964
1110032A04Rik	ENSMUSG00000043461	3	69623460	69663818
Otol1	ENSMUSG00000027788	3	69811535	69832630
Gm17213	ENSMUSG00000090743	3	69234931	69236290
SNORA17	ENSMUSG00000077366	3	69766237	69766367
5S_rRNA	ENSMUSG00000087848	3	69489389	69489502
SNORA17	ENSMUSG00000089507	3	70032669	70032796
Gm10780	ENSMUSG00000074877	3	70493014	70493302
Gm6634	ENSMUSG00000086538	3	70576301	70611213
Sis	ENSMUSG00000027790	3	72692479	72771785
Slitrk3	ENSMUSG00000048304	3	72852048	72860865
Bche	ENSMUSG00000027792	3	73439730	73512337
U2	ENSMUSG00000084752	3	72541753	72541903
7SK	ENSMUSG00000088794	3	73011625	73011923
AC131665.1	ENSMUSG00000077050	3	72950771	72950880
Pdgfc	ENSMUSG00000028019	3	80840338	81017962
Gm9989	ENSMUSG00000056023	3	81725190	81728385
Ctso	ENSMUSG00000028015	3	81736523	81760647
Tdo2	ENSMUSG00000028011	3	81761012	81780124
Accn5	ENSMUSG00000028008	3	81786212	81825155
Gucy1b3	ENSMUSG00000028005	3	81835926	81878633
Gucy1a3	ENSMUSG00000033910	3	81896350	81949799
Mtap9	ENSMUSG00000033900	3	82161994	82199190
Npy2r	ENSMUSG00000028004	3	82342305	82352008
Rbm46	ENSMUSG00000033882	3	82641155	82680405
Lrat	ENSMUSG00000028003	3	82696501	82707895
Fgg	ENSMUSG00000033860	3	82811781	82818975
Fga	ENSMUSG00000028001	3	82830075	82838036
Fgb	ENSMUSG00000033831	3	82846169	82853725
4930564K09Rik	ENSMUSG00000086273	3	82680627	82747560
Plrg1	ENSMUSG00000027998	3	82859444	82876277
SNORA17	ENSMUSG00000089444	3	81684649	81684788
7SK	ENSMUSG00000087902	3	82597578	82597819
Gm6525	ENSMUSG00000078175	3	83978696	83979016
Gm8813	ENSMUSG00000085625	3	84356780	84357374
Dear1	ENSMUSG00000078550	3	84768978	84769502
Gm15535	ENSMUSG00000085527	3	85359968	85377867
Sfrp2	ENSMUSG00000027996	3	83570243	83578238
Tlr2	ENSMUSG00000027995	3	83640195	83645689
D930015E06Rik	ENSMUSG00000033767	3	83702131	83844083
Mnd1	ENSMUSG00000033752	3	83891856	83959708
Trim2	ENSMUSG00000027993	3	83964361	84109368
Fhdc1	ENSMUSG00000041842	3	84247947	84284351
Arfip1	ENSMUSG00000074513	3	84300015	85691438
Tigd4	ENSMUSG00000047819	3	84397496	84400954
Tmem154	ENSMUSG00000056498	3	84470114	84508497
Fbxw7	ENSMUSG00000028086	3	84619190	84783120
Pet112l	ENSMUSG00000028085	3	85378041	85459544
Fam160a1	ENSMUSG00000051000	3	85463983	85550188
Gm16790	ENSMUSG00000085848	3	83577775	83593878
Mir466k	ENSMUSG00000080424	3	85271299	85271420
Gm9790	ENSMUSG00000044330	3	85719705	85719992
Glt28d2	ENSMUSG00000031286	3	85604969	85691440
Prss48	ENSMUSG00000049013	3	85797732	85806413
Sh3d19	ENSMUSG00000028082	3	85888356	85934444
Rps3a	ENSMUSG00000028081	3	85941862	85946624
Lrba	ENSMUSG00000028080	3	86028602	86586615
Snord73a	ENSMUSG00000064984	3	85942713	85942780
Rnu73b	ENSMUSG00000064390	3	85944540	85944610
U6	ENSMUSG00000089394	3	85995338	85995448
U7	ENSMUSG00000089077	3	85766693	85766754
U6	ENSMUSG00000064867	3	86188169	86188275
SNORA32	ENSMUSG00000065847	3	85904456	85904577
U1	ENSMUSG00000065764	3	86168379	86168547
SNORA17	ENSMUSG00000077744	3	86079154	86079284
U6	ENSMUSG00000064840	3	85712275	85712381
SNORA32	ENSMUSG00000077517	3	85754810	85754928
Gm3788	ENSMUSG00000091955	3	86475690	86476166
Mab21l2	ENSMUSG00000057777	3	86349503	86352205
Dclk2	ENSMUSG00000028078	3	86590073	86724803
U1	ENSMUSG00000064872	3	86734665	86734824
S1pr1	ENSMUSG00000045092	3	115413351	115417973
A930005H10Rik	ENSMUSG00000054426	3	115590740	115591048
Dph5	ENSMUSG00000033554	3	115591083	115637279
Slc30a7	ENSMUSG00000054414	3	115641891	115710324
Extl2	ENSMUSG00000027963	3	115710380	115731934
Vcam1	ENSMUSG00000027962	3	115812938	115832606
Gpr88	ENSMUSG00000068696	3	115952572	115956402
Cdc14a	ENSMUSG00000033502	3	115975471	116126950
Rtcd1	ENSMUSG00000000339	3	116191881	116211126
Dbt	ENSMUSG00000000340	3	116215988	116252894
Lrrc39	ENSMUSG00000027961	3	116265891	116286052
Ccdc76	ENSMUSG00000033439	3	116284011	116317505
Sass6	ENSMUSG00000027959	3	116297926	116333902
Hiat1	ENSMUSG00000089911	3	116334082	116384178
Slc35a3	ENSMUSG00000027957	3	116372387	116415749
Agl	ENSMUSG00000033400	3	116442917	116511084
Frrs1	ENSMUSG00000033386	3	116581145	116606668
Palmd	ENSMUSG00000033377	3	116621174	116671905
4930455H04Rik	ENSMUSG00000080907	3	116671185	116687324
1700061I17Rik	ENSMUSG00000028009	3	116763440	116780683
D3Bwg0562e	ENSMUSG00000044667	3	117022063	117063794
4833424O15Rik	ENSMUSG00000033342	3	117278145	117392425
Gm9889	ENSMUSG00000052769	3	115418068	115419645
Gm4596	ENSMUSG00000082394	3	116231055	116231496
Gm9761	ENSMUSG00000034437	3	116264003	116264344
Gm17730	ENSMUSG00000091298	3	115853397	115868739
Gm17632	ENSMUSG00000090721	3	116191884	116196276
SNORA17	ENSMUSG00000077741	3	115768706	115768837
AC165162.1	ENSMUSG00000092666	3	117025859	117025923
Mir669n	ENSMUSG00000089261	3	115682820	115682873
SNORA17	ENSMUSG00000088840	3	116169537	116169633
U1	ENSMUSG00000089060	3	116151307	116151482
Snx7	ENSMUSG00000028007	3	117484415	117571854
Dpyd	ENSMUSG00000033308	3	118265047	119135836
AC122183.1	ENSMUSG00000093000	3	118137639	118137748
AC115933.1	ENSMUSG00000093054	3	117551471	117551570
Mir137	ENSMUSG00000065569	3	118136761	118136862
Calb1	ENSMUSG00000028222	4	15808411	15835211
Decr1	ENSMUSG00000028223	4	15844387	15872654
Nbn	ENSMUSG00000028224	4	15885072	15919736
Osgin2	ENSMUSG00000041153	4	15924268	15941035
Ripk2	ENSMUSG00000041135	4	16049880	16090794
Gm11857	ENSMUSG00000082673	4	15563316	15563639
Gm11858	ENSMUSG00000084181	4	15668077	15668914
Gm11855	ENSMUSG00000081026	4	15746221	15748517
Gm11869	ENSMUSG00000084190	4	15896719	15897075
Gm11870	ENSMUSG00000084408	4	15938152	15939473
Gm11874	ENSMUSG00000081679	4	16047906	16048035
A530072M11Rik	ENSMUSG00000085112	4	16091257	16193372
Gm11865	ENSMUSG00000083725	4	16173416	16176661
Gm11863	ENSMUSG00000083095	4	16290515	16290745
Gm11864	ENSMUSG00000080065	4	16317592	16318811
Gm11861	ENSMUSG00000086072	4	16392023	16436470
Gm11862	ENSMUSG00000083229	4	16642091	16642749
Gm11848	ENSMUSG00000082994	4	16959835	16960807
Gm11850	ENSMUSG00000082552	4	16972721	16973199
Gm11849	ENSMUSG00000083572	4	17183248	17183508
U7	ENSMUSG00000088612	4	15981421	15981485
U6	ENSMUSG00000064657	4	16603070	16603176
AL928542.1	ENSMUSG00000080470	4	15747056	15747176
AL807379.1	ENSMUSG00000092822	4	16056713	16056822
U6	ENSMUSG00000064619	4	16788836	16788941
SNORA17	ENSMUSG00000088055	4	15838714	15838781
U6	ENSMUSG00000089218	4	17487064	17487166
Gm10592	ENSMUSG00000073871	4	42594227	42595153
Gm2163	ENSMUSG00000078725	4	42602069	42603149
Gm10591	ENSMUSG00000073869	4	42625653	42626784
Ccl27b	ENSMUSG00000066202	4	42664149	42669537
Il11ra2	ENSMUSG00000066201	4	42668807	42679295
Gm9969	ENSMUSG00000055406	4	42681536	42682026
Gm10590	ENSMUSG00000073868	4	42728458	42733425
4930578G10Rik	ENSMUSG00000054885	4	42749077	42859120
Ccl19	ENSMUSG00000071005	4	42768057	42770109
Ccl21a	ENSMUSG00000071003	4	42786392	42787525
Gm12394	ENSMUSG00000078722	4	42795460	42869643
Gm12429	ENSMUSG00000078721	4	42860943	42866760
BC049635	ENSMUSG00000050141	4	42880876	42887106
N28178	ENSMUSG00000036062	4	42929532	42957624
Dnajb5	ENSMUSG00000036052	4	42962686	42972297
1700022I11Rik	ENSMUSG00000028451	4	42982818	42996511
Vcp	ENSMUSG00000028452	4	42992835	43013379
Fancg	ENSMUSG00000028453	4	43015215	43023378
Pigo	ENSMUSG00000028454	4	43030507	43038691
Stoml2	ENSMUSG00000028455	4	43040562	43044582
B230312A22Rik	ENSMUSG00000036002	4	43045286	43059092
Unc13b	ENSMUSG00000028456	4	43071825	43277745
Atp8b5	ENSMUSG00000028457	4	43280031	43386705
Rusc2	ENSMUSG00000035969	4	43394851	43439960
Fam166b	ENSMUSG00000042788	4	43439891	43442006
Tesk1	ENSMUSG00000028458	4	43454811	43460936
Cd72	ENSMUSG00000028459	4	43459334	43467500
Sit1	ENSMUSG00000028460	4	43494953	43496606
Ccdc107	ENSMUSG00000028461	4	43505772	43508793
E130306D19Rik	ENSMUSG00000051517	4	43509014	43512567
Car9	ENSMUSG00000028463	4	43519838	43526601
Tpm2	ENSMUSG00000028464	4	43527583	43536637
Tln1	ENSMUSG00000028465	4	43544391	43575563
Creb3	ENSMUSG00000028466	4	43575204	43579932
Gba2	ENSMUSG00000028467	4	43579800	43591745
Rgp1	ENSMUSG00000028468	4	43591587	43600359
Msmp	ENSMUSG00000078719	4	43596088	43597366
Npr2	ENSMUSG00000028469	4	43644807	43664116
Spag8	ENSMUSG00000066196	4	43664207	43666466
Hint2	ENSMUSG00000028470	4	43667099	43669338
4930412F15Rik	ENSMUSG00000043633	4	43672494	43682017
Tmem8b	ENSMUSG00000078716	4	43681843	43705540
Olfr70	ENSMUSG00000050215	4	43707872	43713679
Olfr71	ENSMUSG00000046450	4	43718500	43723103
Hrct1	ENSMUSG00000071001	4	43740070	43741511
Olfr159	ENSMUSG00000044801	4	43782922	43783881
Olfr156	ENSMUSG00000059448	4	43833207	43834305
Olfr157	ENSMUSG00000059101	4	43847624	43849389
Olfr155	ENSMUSG00000071000	4	43864437	43868335
Reck	ENSMUSG00000028476	4	43888402	43957678
Glipr2	ENSMUSG00000028480	4	43970273	43991990
Ccin	ENSMUSG00000070999	4	43996376	43998405
Clta	ENSMUSG00000028478	4	44017324	44045718
Gne	ENSMUSG00000028479	4	44046947	44097049
Rnf38	ENSMUSG00000035696	4	44139082	44246661
Melk	ENSMUSG00000035683	4	44313748	44377547
Pax5	ENSMUSG00000014030	4	44544017	44724318
Gm17599	ENSMUSG00000091065	4	43043871	43045354
Olfr269-ps1	ENSMUSG00000083417	4	43780348	43780649
Olfr29-ps1	ENSMUSG00000081420	4	43794253	43795200
Gm12492	ENSMUSG00000081329	4	43811768	43813127
Gm12503	ENSMUSG00000087326	4	44105504	44122183
Gm12504	ENSMUSG00000084274	4	44134765	44136995
Gm12677	ENSMUSG00000081127	4	44326299	44326930
Gm12455	ENSMUSG00000083803	4	44395794	44396209
Gm16972	ENSMUSG00000086983	4	43058906	43066125
Gm10593	ENSMUSG00000073872	4	42566010	42600570
Gm12395	ENSMUSG00000085910	4	42750125	42751626
Gm12454	ENSMUSG00000087142	4	43517300	43521619
Gm12472	ENSMUSG00000085351	4	43600944	43621627
Gm12473	ENSMUSG00000086043	4	43644411	43654405
Gm12481	ENSMUSG00000043770	4	43676833	43677211
5430416O09Rik	ENSMUSG00000028475	4	43742906	43747406
A630077J23Rik	ENSMUSG00000086864	4	43768995	43772336
5S_rRNA	ENSMUSG00000088947	4	43705558	43705689
AL732626.1	ENSMUSG00000092675	4	43644297	43644429
Mir5106	ENSMUSG00000092677	4	44234067	44234139
SNORA17	ENSMUSG00000077587	4	44425341	44425467
U7	ENSMUSG00000089028	4	43214021	43214085
RNase_MRP	ENSMUSG00000088088	4	43505660	43505930
SNORA17	ENSMUSG00000077552	4	43149371	43149500
U1	ENSMUSG00000088532	4	44094161	44094272
CK137956	ENSMUSG00000028813	4	127604836	127648195
Csmd2	ENSMUSG00000028804	4	127665101	128244903
Hmgb4	ENSMUSG00000048686	4	127937457	127938139
Zscan20	ENSMUSG00000061894	4	128260783	128287342
Tlr12	ENSMUSG00000062545	4	128292690	128295863
Phc2	ENSMUSG00000028796	4	128331982	128430125
A3galt2	ENSMUSG00000028794	4	128432608	128446542
Zfp362	ENSMUSG00000028799	4	128450332	128483289
Trim62	ENSMUSG00000041000	4	128560824	128588572
Adc	ENSMUSG00000028789	4	128607477	128639686
Ak2	ENSMUSG00000028792	4	128669202	128688773
Rnf19b	ENSMUSG00000028793	4	128735515	128763130
Tmem54	ENSMUSG00000028786	4	128782792	128788870
Hpca	ENSMUSG00000028785	4	128788814	128799280
Fndc5	ENSMUSG00000001334	4	128814243	128821837
S100pbp	ENSMUSG00000040928	4	128825249	128866971
Yars	ENSMUSG00000028811	4	128867004	128896851
C77080	ENSMUSG00000050390	4	128896822	128938648
Sync	ENSMUSG00000001333	4	128964861	128985803
Rbbp4	ENSMUSG00000057236	4	128984344	129012614
Zbtb8os	ENSMUSG00000057572	4	129012939	129031791
Zbtb8a	ENSMUSG00000028807	4	129030872	129055360
4930471C06Rik	ENSMUSG00000086138	4	127152092	127154084
1700080G11Rik	ENSMUSG00000086771	4	127208866	127210129
A630031M04Rik	ENSMUSG00000087470	4	127222345	127247746
1700112K13Rik	ENSMUSG00000087510	4	127487882	127489417
4930465A12Rik	ENSMUSG00000087459	4	127810767	127841503
4930546G22Rik	ENSMUSG00000085717	4	127938288	127940234
Gm12958	ENSMUSG00000084891	4	128314715	128315691
Gm12968	ENSMUSG00000085701	4	128523441	128550942
Gm12969	ENSMUSG00000084011	4	128545637	128546640
Gm15904	ENSMUSG00000085961	4	128613249	128617439
1700086P04Rik	ENSMUSG00000085085	4	128727341	128735227
Gm15906	ENSMUSG00000087416	4	128812335	128814154
Gm12976	ENSMUSG00000087575	4	128939209	128942254
Gm12980	ENSMUSG00000082468	4	129057088	129057423
Gm17525	ENSMUSG00000091673	4	128986325	128995687
snoU13	ENSMUSG00000088921	4	128896701	128896788
AL607123.1	ENSMUSG00000093163	4	128960109	128960190
Zbtb8b	ENSMUSG00000048485	4	129103009	129118097
Bsdc1	ENSMUSG00000040859	4	129138825	129165742
U1	ENSMUSG00000064613	4	129135595	129135734
Tssk3	ENSMUSG00000000411	4	129166258	129168266
1700125D06Rik	ENSMUSG00000078554	4	129168434	129169200
Gm12979	ENSMUSG00000086336	4	129169213	129186990
Marcksl1	ENSMUSG00000047945	4	129190825	129193229
Hdac1	ENSMUSG00000028800	4	129193348	129219957
Lck	ENSMUSG00000000409	4	129225588	129250885
Fam167b	ENSMUSG00000050493	4	129254059	129255793
Eif3i	ENSMUSG00000028798	4	129269204	129277892
2510006D16Rik	ENSMUSG00000028797	4	129277912	129301303
Dcdc2b	ENSMUSG00000078552	4	129285773	129291498
Iqcc	ENSMUSG00000040795	4	129292370	129296343
Ccdc28b	ENSMUSG00000028795	4	129296518	129301191
Txlna	ENSMUSG00000053841	4	129303327	129318309
Kpna6	ENSMUSG00000003731	4	129321224	129350011
Tmem39b	ENSMUSG00000053730	4	129353599	129374082
Khdrbs1	ENSMUSG00000028790	4	129380408	129419547
Ptp4a2	ENSMUSG00000028788	4	129488463	129527247
Gm12965	ENSMUSG00000086797	4	129300855	129301336
Gm12967	ENSMUSG00000080944	4	129438872	129439160
Gm10571	ENSMUSG00000073753	4	129532315	129533954
Gm12966	ENSMUSG00000070729	4	129576337	129577146
E330017L17Rik	ENSMUSG00000086369	4	129583460	129597031
U1	ENSMUSG00000065768	4	129572817	129572968
Spocd1	ENSMUSG00000028784	4	129624791	129634359
Bai2	ENSMUSG00000028782	4	129662114	129699877
1700003M07Rik	ENSMUSG00000085389	4	129637618	129640901
Gm12963	ENSMUSG00000085517	4	129701500	129725018
Col16a1	ENSMUSG00000040690	4	129725084	129776527
Pef1	ENSMUSG00000028779	4	129779802	129805379
Hcrtr1	ENSMUSG00000028778	4	129807461	129816603
Tinagl1	ENSMUSG00000028776	4	129841698	129852366
Gm853	ENSMUSG00000023120	4	129886353	129899645
Serinc2	ENSMUSG00000023232	4	129930739	129956449
Gm10570	ENSMUSG00000073752	4	129985406	129985918
Fabp3	ENSMUSG00000028773	4	129985839	129992707
Zcchc17	ENSMUSG00000028772	4	129992627	130037190
Snrnp40	ENSMUSG00000074088	4	130037379	130067274
Nkain1	ENSMUSG00000078532	4	130125705	130169623
Angptl7	ENSMUSG00000028989	4	147869292	147874569
Exosc10	ENSMUSG00000017264	4	147932538	147956510
Srm	ENSMUSG00000006442	4	147965612	147969102
Masp2	ENSMUSG00000028979	4	147976663	147989608
Tardbp	ENSMUSG00000041459	4	147986491	148001128
Gm13151	ENSMUSG00000078498	4	146679783	146707843
Gm13145	ENSMUSG00000078497	4	146735412	146765113
Gm13152	ENSMUSG00000078496	4	146866526	146887595
Gm16503	ENSMUSG00000078160	4	146914327	146917609
Gm13154	ENSMUSG00000065999	4	146927386	146959307
2610305D13Rik	ENSMUSG00000066000	4	146986046	147052416
Zfp534	ENSMUSG00000062518	4	147047611	147076662
Gm13157	ENSMUSG00000078495	4	147128083	147183895
Zfp933	ENSMUSG00000059423	4	147197095	147222475
Miip	ENSMUSG00000029022	4	147234887	147242925
Fv1	ENSMUSG00000070583	4	147243088	147244467
Mfn2	ENSMUSG00000029020	4	147247708	147278813
Plod1	ENSMUSG00000019055	4	147283862	147310876
2510039O18Rik	ENSMUSG00000044496	4	147315004	147321423
Nppb	ENSMUSG00000029019	4	147359897	147361314
Nppa	ENSMUSG00000041616	4	147374831	147376188
Clcn6	ENSMUSG00000029016	4	147378368	147412930
Mthfr	ENSMUSG00000029009	4	147413186	147433660
Agtrap	ENSMUSG00000029007	4	147451170	147462140
2610109H07Rik	ENSMUSG00000029005	4	147472546	147504807
Mad2l2	ENSMUSG00000029003	4	147504493	147519808
Fbxo6	ENSMUSG00000055401	4	147519825	147526249
Fbxo44	ENSMUSG00000029001	4	147526909	147534591
Fbxo2	ENSMUSG00000041556	4	147534730	147540533
Ptchd2	ENSMUSG00000041544	4	147614373	147662074
Gm572	ENSMUSG00000070577	4	148017426	148045681
Casz1	ENSMUSG00000028977	4	148178538	148328998
Pex14	ENSMUSG00000028975	4	148334644	148473985
Dffa	ENSMUSG00000028974	4	148478255	148494756
Cort	ENSMUSG00000028971	4	148499143	148500872
Apitd1	ENSMUSG00000073705	4	148501230	148511738
Pgd	ENSMUSG00000028961	4	148524100	148540880
Kif1b	ENSMUSG00000063077	4	148550428	148681802
Gm16889	ENSMUSG00000084976	4	146392344	146866310
Gm17317	ENSMUSG00000091833	4	146510387	146831128
Ubiad1	ENSMUSG00000047719	4	147808604	147818880
Mtor	ENSMUSG00000028991	4	147822720	147931792
Gm13147	ENSMUSG00000087207	4	146604393	146633447
Gm13158	ENSMUSG00000081627	4	146641482	146642217
Gm13135	ENSMUSG00000082925	4	146650085	146653205
Gm13144	ENSMUSG00000082150	4	146655555	146655899
Gm8178	ENSMUSG00000081140	4	146753038	146753683
Gm13161	ENSMUSG00000082248	4	146817580	146818138
Gm15951	ENSMUSG00000081301	4	146894577	146894976
Gm13141	ENSMUSG00000082599	4	146901828	146902283
Gm13155	ENSMUSG00000081371	4	146998349	146998994
Gm16211	ENSMUSG00000086130	4	147042627	147044963
Gm13137	ENSMUSG00000082944	4	147106897	147107241
Gm13136	ENSMUSG00000081179	4	147109586	147112535
Gm13148	ENSMUSG00000083642	4	147119926	147120670
RP23-406N5.8	ENSMUSG00000093594	4	147156428	147183949
Rps19-ps3	ENSMUSG00000080059	4	147195886	147196335
Gm13156	ENSMUSG00000083340	4	147267782	147268102
Gm13054	ENSMUSG00000086806	4	147375200	147378123
Gm13207	ENSMUSG00000083473	4	147405663	147406435
Gm13202	ENSMUSG00000081726	4	147442140	147442601
Gm13201	ENSMUSG00000078494	4	147445716	147449529
Gm13206	ENSMUSG00000087027	4	147680962	147690678
Gm13200	ENSMUSG00000086326	4	147730488	147733569
Gm13204	ENSMUSG00000082860	4	147943165	147943985
Gm13209	ENSMUSG00000087217	4	147958830	147960116
Gm13203	ENSMUSG00000087273	4	148087812	148090690
Gm15969	ENSMUSG00000086766	4	148287620	148288433
Gm13205	ENSMUSG00000086606	4	148321601	148323023
Gm17029	ENSMUSG00000086740	4	148334406	148358780
Gm9506	ENSMUSG00000081086	4	148470492	148470811
Rpsa-ps12	ENSMUSG00000080746	4	148516541	148517576
AL607145.1	ENSMUSG00000076356	4	148239070	148239159
U6	ENSMUSG00000088625	4	147929806	147929913
U1	ENSMUSG00000064648	4	147817443	147817594
U6	ENSMUSG00000089081	4	147913236	147913339
Ube4b	ENSMUSG00000028960	4	148702525	148800858
Rbp7	ENSMUSG00000028996	4	148823796	148829087
Nmnat1	ENSMUSG00000028992	4	148841681	148859311
Lzic	ENSMUSG00000028990	4	148859338	148870777
Ctnnbip1	ENSMUSG00000028988	4	148892345	148940546
Clstn1	ENSMUSG00000039953	4	148960577	149023008
Pik3cd	ENSMUSG00000039936	4	149023277	149076680
Tmem201	ENSMUSG00000044700	4	149089484	149112153
Slc25a33	ENSMUSG00000028982	4	149118145	149148386
1700121F15Rik	ENSMUSG00000085286	4	148708748	148710006
Gm13069	ENSMUSG00000085807	4	148712196	148712640
A930028C08Rik	ENSMUSG00000085819	4	148721994	148739386
Gm13072	ENSMUSG00000070572	4	148831438	148831815
Gm13097	ENSMUSG00000087198	4	148852775	148857640
Gm13071	ENSMUSG00000083811	4	148874742	148875117
Gm13066	ENSMUSG00000086949	4	148939729	148941899
Gm13068	ENSMUSG00000085403	4	149122627	149123716
AL645645.1	ENSMUSG00000093403	4	148911972	148912031
U6	ENSMUSG00000084646	4	148891288	148891391
Rab28	ENSMUSG00000029128	5	42016215	42099394
Nkx3-2	ENSMUSG00000049691	5	42152404	42155735
Bod1l	ENSMUSG00000061755	5	42178781	42235407
Gm2810	ENSMUSG00000082938	5	40719677	40720666
U2	ENSMUSG00000089393	5	40796989	40797168
Gm16223	ENSMUSG00000067285	5	42459199	42608037
Slit2	ENSMUSG00000031558	5	48374394	48697521
Pacrgl	ENSMUSG00000029089	5	48763631	48779995
Kcnip4	ENSMUSG00000029088	5	48780741	49916143
Gm7931	ENSMUSG00000067321	5	46805583	46805855
4930518C09Rik	ENSMUSG00000092309	5	48394305	48396946
Gm20475	ENSMUSG00000092559	5	48397023	48399162
Mir218-1	ENSMUSG00000065603	5	48615181	48615290
5730480H06Rik	ENSMUSG00000093459	5	48786812	48805533
RP23-14C20.1	ENSMUSG00000093502	5	48982128	48991232
Gm19031	ENSMUSG00000093748	5	49057144	49058508
Gm10025	ENSMUSG00000057577	5	49315355	49315730
Gm10048	ENSMUSG00000058754	5	49319100	49319473
Gm19932	ENSMUSG00000093490	5	49815080	49815394
Gm5555	ENSMUSG00000083477	5	49943496	49944509
Gpr125	ENSMUSG00000029090	5	50351190	50450235
Gm7205	ENSMUSG00000067313	5	50608486	50673525
U6	ENSMUSG00000065064	5	50681619	50681725
Ppargc1a	ENSMUSG00000029167	5	51845488	51958964
Dhx15	ENSMUSG00000029169	5	52541448	52581758
Sod3	ENSMUSG00000072941	5	52755185	52762644
Ccdc149	ENSMUSG00000045790	5	52765892	52766785
Lgi2	ENSMUSG00000039252	5	52924758	52957542
8030423F21Rik	ENSMUSG00000052295	5	52998789	53010250
Sepsecs	ENSMUSG00000029173	5	53031326	53060968
Pi4k2b	ENSMUSG00000029186	5	53132826	53160583
Zcchc4	ENSMUSG00000029179	5	53166648	53215904
Anapc4	ENSMUSG00000029176	5	53225254	53259036
Slc34a2	ENSMUSG00000029188	5	53429321	53462903
Sel1l3	ENSMUSG00000029189	5	53498323	53604691
1810013D10Rik	ENSMUSG00000061461	5	53658345	53674749
9230114K14Rik	ENSMUSG00000087676	5	52581920	52589223
Gm17182	ENSMUSG00000090642	5	53438926	53440426
n-R5s172	ENSMUSG00000077696	5	53737498	53737611
SNORA42	ENSMUSG00000077757	5	53350590	53350701
U6	ENSMUSG00000088981	5	52734357	52734461
5S_rRNA	ENSMUSG00000088646	5	53809812	53809921
n-R5s171	ENSMUSG00000077316	5	53534399	53534477
Alb	ENSMUSG00000029368	5	90889915	90905629
Afp	ENSMUSG00000054932	5	90919740	90937933
Afm	ENSMUSG00000029369	5	90947958	90982569
5830473C10Rik	ENSMUSG00000070690	5	90990244	91007024
Rassf6	ENSMUSG00000029370	5	91032102	91069513
Cxcl5	ENSMUSG00000029371	5	91188325	91190651
Ppbp	ENSMUSG00000029372	5	91197544	91199086
Pf4	ENSMUSG00000029373	5	91201461	91202407
Cxcl3	ENSMUSG00000029379	5	91215129	91217112
Cxcl15	ENSMUSG00000029375	5	91223560	91232093
Cxcl1	ENSMUSG00000029380	5	91320267	91322141
Cxcl2	ENSMUSG00000058427	5	91332897	91334935
Mthfd2l	ENSMUSG00000029376	5	91360222	91450386
Epgn	ENSMUSG00000035020	5	91456490	91464241
Ereg	ENSMUSG00000029377	5	91503643	91522675
Areg	ENSMUSG00000029378	5	91568641	91577458
Btc	ENSMUSG00000082361	5	91786287	91831939
Parm1	ENSMUSG00000034981	5	91946641	92055920
Rchy1	ENSMUSG00000029397	5	92377930	92392094
Thap6	ENSMUSG00000060466	5	92392359	92401068
Gm1045	ENSMUSG00000055801	5	92416501	92419330
Cdkl2	ENSMUSG00000029403	5	92435100	92472068
G3bp2	ENSMUSG00000029405	5	92481172	92512761
Uso1	ENSMUSG00000029407	5	92566964	92631820
U90926	ENSMUSG00000029409	5	92638922	92644434
Ppef2	ENSMUSG00000029410	5	92656000	92682185
Naaa	ENSMUSG00000029413	5	92686685	92707196
Sdad1	ENSMUSG00000029415	5	92713036	92739050
Cxcl9	ENSMUSG00000029417	5	92750357	92757105
Art3	ENSMUSG00000034842	5	92760853	92843654
Cxcl10	ENSMUSG00000034855	5	92775664	92777915
Nup54	ENSMUSG00000034826	5	92844566	92864245
Gm15710	ENSMUSG00000084111	5	91701001	92569955
Cxcl11	ENSMUSG00000060183	5	92788570	92794511
Gm2673	ENSMUSG00000082068	5	92792930	92794537
Gm9793	ENSMUSG00000092011	5	92472090	92484986
AC105995.1	ENSMUSG00000093082	5	91225212	91225281
SNORA57	ENSMUSG00000084745	5	92622348	92622491
U6atac	ENSMUSG00000088623	5	92731200	92731318
5S_rRNA	ENSMUSG00000088949	5	92547203	92547309
7SK	ENSMUSG00000088102	5	92411731	92412006
U6	ENSMUSG00000064533	5	91646924	91647030
SCARNA4	ENSMUSG00000088777	5	92858811	92858954
SCARNA23	ENSMUSG00000088712	5	92485090	92485218
5S_rRNA	ENSMUSG00000088075	5	91322406	91322522
AC122438.1	ENSMUSG00000093609	5	92540374	92540444
Tmem211	ENSMUSG00000066964	5	113655929	113668283
Sgsm1	ENSMUSG00000042216	5	113672240	113739806
Aym1	ENSMUSG00000053873	5	113786314	113786841
Wscd2	ENSMUSG00000063430	5	113919467	114039679
Cmklr1	ENSMUSG00000042190	5	114062363	114100435
1700069L16Rik	ENSMUSG00000042184	5	114142431	114174781
Ficd	ENSMUSG00000053334	5	114185791	114190609
Sart3	ENSMUSG00000018974	5	114192455	114221658
Gm3511	ENSMUSG00000069196	5	114217108	114217421
Iscu	ENSMUSG00000025825	5	114222757	114228297
Tmem119	ENSMUSG00000054675	5	114243738	114250525
Selplg	ENSMUSG00000048163	5	114267807	114280510
Coro1c	ENSMUSG00000004530	5	114292445	114358767
Ssh1	ENSMUSG00000042121	5	114387103	114443903
Dao	ENSMUSG00000042096	5	114453712	114475458
Svop	ENSMUSG00000042078	5	114476919	114541579
Usp30	ENSMUSG00000029592	5	114550342	114573515
Alkbh2	ENSMUSG00000044339	5	114573935	114578227
Ung	ENSMUSG00000029591	5	114580395	114589332
Acacb	ENSMUSG00000042010	5	114596544	114700770
Foxn4	ENSMUSG00000042002	5	114704173	114723816
Myo1h	ENSMUSG00000066952	5	114764950	114814585
Kctd10	ENSMUSG00000001098	5	114813576	114830524
Ube3b	ENSMUSG00000029577	5	114830637	114871177
Mmab	ENSMUSG00000029575	5	114881043	114894068
Mvk	ENSMUSG00000041939	5	114894278	114910600
BC057022	ENSMUSG00000041930	5	115018025	115063229
Trpv4	ENSMUSG00000014158	5	115072161	115108430
Gltp	ENSMUSG00000011884	5	115119412	115140993
Tchp	ENSMUSG00000002486	5	115157769	115172336
Git2	ENSMUSG00000041890	5	115177416	115225526
Ankrd13a	ENSMUSG00000041870	5	115224686	115256209
1500011B03Rik	ENSMUSG00000072694	5	115258205	115263985
Gm20499	ENSMUSG00000092252	5	115259045	115273469
1500011B03Rik	ENSMUSG00000092279	5	115262802	115263954
2610524H06Rik	ENSMUSG00000092486	5	115271944	115273477
Gm13821	ENSMUSG00000078186	5	115292358	115292871
4930519G04Rik	ENSMUSG00000029564	5	115303673	115333668
Gm9936	ENSMUSG00000054123	5	115305767	115308691
Oasl2	ENSMUSG00000029561	5	115346943	115362243
Oasl1	ENSMUSG00000041827	5	115373249	115387924
2210016L21Rik	ENSMUSG00000029559	5	115392167	115399792
Hnf1a	ENSMUSG00000029556	5	115398370	115421076
Sppl3	ENSMUSG00000029550	5	115461146	115548799
Gm10401	ENSMUSG00000072693	5	115547698	115548304
Acads	ENSMUSG00000029545	5	115560308	115569355
Unc119b	ENSMUSG00000046562	5	115572559	115584984
Mlec	ENSMUSG00000048578	5	115592990	115608188
Wscd2	ENSMUSG00000085571	5	113919772	113919960
Gm15736	ENSMUSG00000085713	5	114094972	114095691
Gm17122	ENSMUSG00000090458	5	114292610	114293125
Gm16108	ENSMUSG00000089734	5	114515470	114539475
Gm13784	ENSMUSG00000084243	5	114687185	114687934
Gm13789	ENSMUSG00000085590	5	114813424	114815366
Gm13790	ENSMUSG00000086302	5	115001298	115004025
4930515G01Rik	ENSMUSG00000092183	5	115223746	115224992
Gm13820	ENSMUSG00000078187	5	115266974	115267111
Gm13819	ENSMUSG00000082052	5	115278582	115279224
Gm13823	ENSMUSG00000080707	5	115317690	115318034
Gm13822	ENSMUSG00000087477	5	115367327	115373286
Gm13824	ENSMUSG00000086054	5	115418793	115448055
Gm13825	ENSMUSG00000086140	5	115418832	115421409
Gm13827	ENSMUSG00000086167	5	115503430	115503855
Gm13826	ENSMUSG00000072692	5	115552931	115560277
AC151577.1	ENSMUSG00000093343	5	113690296	113690368
U6	ENSMUSG00000065320	5	114378733	114378813
Cabp1	ENSMUSG00000029544	5	115618698	115644390
Gm13828	ENSMUSG00000083182	5	115648352	115648714
Pop5	ENSMUSG00000060152	5	115685845	115695360
Rnf10	ENSMUSG00000041740	5	115691421	115722907
Gm13831	ENSMUSG00000083875	5	115713102	115713403
Coq5	ENSMUSG00000041733	5	115729675	115746981
Dynll1	ENSMUSG00000009013	5	115747119	115751008
Srsf9	ENSMUSG00000029538	5	115777186	115783089
Gatc	ENSMUSG00000029536	5	115783251	115791187
Triap1	ENSMUSG00000029535	5	115791234	115793578
Cox6a1	ENSMUSG00000041697	5	115795651	115798990
Msi1	ENSMUSG00000054256	5	115879608	115905707
4930430O22Rik	ENSMUSG00000057354	5	115886077	115886615
Pla2g1b	ENSMUSG00000029522	5	115916271	115924731
Sirt4	ENSMUSG00000029524	5	115928019	115934734
Pxn	ENSMUSG00000029528	5	115956685	116005996
Rplp0	ENSMUSG00000067274	5	116009476	116013736
Gcn1l1	ENSMUSG00000041638	5	116015263	116072665
Gm13829	ENSMUSG00000082610	5	115741772	115741909
Gm13830	ENSMUSG00000086368	5	115751129	115769217
4930401G09Rik	ENSMUSG00000086352	5	115808709	115810132
Gm13832	ENSMUSG00000087292	5	115809087	115872872
Gm13836	ENSMUSG00000081282	5	115941900	115942464
Gm13840	ENSMUSG00000086849	5	115965272	115965956
U4	ENSMUSG00000075998	5	115939468	115939608
U4	ENSMUSG00000075779	5	115940263	115940403
Rab35	ENSMUSG00000029518	5	116081938	116097745
Ccdc64	ENSMUSG00000041609	5	116098184	116181630
Gm13841	ENSMUSG00000083833	5	116251568	116252219
Cit	ENSMUSG00000029516	5	116295287	116458956
Prkab1	ENSMUSG00000029513	5	116463595	116474517
Tmem233	ENSMUSG00000079278	5	116488764	116533253
Ccdc60	ENSMUSG00000043913	5	116574650	116738994
Gm14508	ENSMUSG00000085376	5	116459325	116466114
Gm13842	ENSMUSG00000084992	5	116476420	116479239
Gm17420	ENSMUSG00000090728	5	116482155	116482322
C330018A13Rik	ENSMUSG00000086655	5	116573623	116579119
Gm14507	ENSMUSG00000086122	5	116693715	116704962
Tfec	ENSMUSG00000029553	6	16783381	16848441
Tes	ENSMUSG00000029552	6	17015149	17055828
Cav2	ENSMUSG00000000058	6	17231185	17239115
Cav1	ENSMUSG00000007655	6	17256335	17291452
Met	ENSMUSG00000009376	6	17413800	17523980
Capza2	ENSMUSG00000015733	6	17586234	17616972
St7	ENSMUSG00000029534	6	17642933	17893025
Wnt2	ENSMUSG00000010797	6	17938940	17980585
Asz1	ENSMUSG00000010796	6	18000964	18059061
Cftr	ENSMUSG00000041301	6	18120687	18272768
Cttnbp2	ENSMUSG00000000416	6	18316478	18465338
Gm5721	ENSMUSG00000081744	6	16875231	16876926
Gm15473	ENSMUSG00000084772	6	17008806	17014996
Gm4876	ENSMUSG00000054556	6	17015010	17121833
D830026I12Rik	ENSMUSG00000085171	6	17147751	17160152
Gm15581	ENSMUSG00000085264	6	17156823	17335604
Gm13898	ENSMUSG00000086409	6	17660598	17661225
Gm13899	ENSMUSG00000081077	6	17661687	17662941
Gm15593	ENSMUSG00000084203	6	18094734	18095741
Gm15596	ENSMUSG00000082289	6	18106337	18107120
Gm15592	ENSMUSG00000087389	6	18220136	18239048
Gm15595	ENSMUSG00000080767	6	18244271	18245231
Gm15594	ENSMUSG00000084947	6	18374684	18377885
U6	ENSMUSG00000064965	6	17386306	17386412
AC027654.1	ENSMUSG00000093271	6	18399271	18399340
Naa38	ENSMUSG00000044155	6	18798579	18805751
Ankrd7	ENSMUSG00000029517	6	18816318	18829586
Gm5874	ENSMUSG00000071568	6	18774552	18775058
Gm16854	ENSMUSG00000085607	6	18794220	18797360
U6	ENSMUSG00000065051	6	18677292	18677398
7SK	ENSMUSG00000084650	6	18996837	18997151
Gm17725	ENSMUSG00000091555	6	51329709	51342776
5430402O13Rik	ENSMUSG00000085776	6	50516642	50544864
Gm15055	ENSMUSG00000085412	6	52052948	52062531
Gm8078	ENSMUSG00000081979	6	52068241	52068890
Gm15052	ENSMUSG00000082781	6	52081777	52082045
Gm15051	ENSMUSG00000087658	6	52106901	52112118
5730446D14Rik	ENSMUSG00000056445	6	52115673	52119563
Gm15050	ENSMUSG00000087626	6	52122880	52124058
2700086A05Rik	ENSMUSG00000085696	6	52125216	52165075
9930038K12Rik	ENSMUSG00000092475	6	52178246	52180531
9930038K12Rik	ENSMUSG00000056583	6	52180079	52180529
Hoxa11as	ENSMUSG00000086427	6	52194392	52199798
Gm15053	ENSMUSG00000055408	6	52212769	52217597
5730457N03Rik	ENSMUSG00000086126	6	52258383	52264826
Gm8129	ENSMUSG00000059159	6	52296724	52296939
Gm15054	ENSMUSG00000084282	6	52307538	52307818
Hnrnpa2b1	ENSMUSG00000004980	6	51410433	51419893
Cbx3	ENSMUSG00000029836	6	51420359	51433703
Snx10	ENSMUSG00000038301	6	51473900	51540678
Skap2	ENSMUSG00000059182	6	51809165	51962548
Hoxa1	ENSMUSG00000029844	6	52105366	52108316
Hoxa2	ENSMUSG00000014704	6	52112350	52115412
RP23-103L13.8	ENSMUSG00000093412	6	52113358	52163338
Hoxa3	ENSMUSG00000079560	6	52118509	52163335
5730596B20Rik	ENSMUSG00000056468	6	52127497	52130850
Hoxa4	ENSMUSG00000000942	6	52139670	52141752
Hoxa3	ENSMUSG00000059723	6	52149150	52163335
Hoxa5	ENSMUSG00000038253	6	52151753	52154586
Hoxa6	ENSMUSG00000043219	6	52155430	52161355
Hoxa7	ENSMUSG00000038236	6	52164490	52171853
Hoxa9	ENSMUSG00000038227	6	52173099	52181088
Hoxa10	ENSMUSG00000000938	6	52181196	52190853
Hoxa11	ENSMUSG00000038210	6	52192107	52196213
Hoxa13	ENSMUSG00000038203	6	52207693	52210874
Evx1	ENSMUSG00000005503	6	52263492	52268372
Nfe2l3	ENSMUSG00000029832	6	51382669	51408767
Cycs	ENSMUSG00000063694	6	50512562	50516537
4921507P07Rik	ENSMUSG00000029828	6	50523301	50546631
Gm4782	ENSMUSG00000092012	6	50558636	50560708
Gm8038	ENSMUSG00000091981	6	50569821	50571884
Npvf	ENSMUSG00000029831	6	50600671	50604438
G930045G22Rik	ENSMUSG00000073072	6	50796523	50828078
SNORA17	ENSMUSG00000077357	6	50489903	50490033
Mir148a	ENSMUSG00000065505	6	51219811	51219909
AC153877.1	ENSMUSG00000092936	6	51571631	51571707
Mir196b	ENSMUSG00000065443	6	52180080	52180164
Hibadh	ENSMUSG00000029776	6	52496222	52590383
Tax1bp1	ENSMUSG00000004535	6	52663723	52716774
Jazf1	ENSMUSG00000063568	6	52718791	53018625
SNORA32	ENSMUSG00000064792	6	52589228	52589349
Gm15572	ENSMUSG00000081872	6	52793103	52793695
Gm15573	ENSMUSG00000080759	6	52995878	52996417
SCARNA20	ENSMUSG00000089209	6	52960388	52960526
Chl1	ENSMUSG00000030077	6	103460870	103699671
Cntn6	ENSMUSG00000030092	6	104442784	104813400
U7	ENSMUSG00000088265	6	103538698	103538759
U7	ENSMUSG00000089091	6	103782507	103782572
SNORA48	ENSMUSG00000089587	6	105182599	105182737
Gm15631	ENSMUSG00000085067	6	105624749	105627575
Cntn4	ENSMUSG00000064293	6	105627654	106649304
Il5ra	ENSMUSG00000005364	6	106660378	106695103
Trnt1	ENSMUSG00000013736	6	106719114	106732468
Crbn	ENSMUSG00000005362	6	106728243	106750068
U6	ENSMUSG00000064466	6	106951446	106951552
AC167724.1	ENSMUSG00000093127	6	107398813	107398938
Lrrn1	ENSMUSG00000034648	6	107479779	107520204
Pzp	ENSMUSG00000030359	6	128433585	128476738
BC048546	ENSMUSG00000047228	6	128489840	128531624
Klrb1a	ENSMUSG00000030361	6	128559245	128572952
Gm5884	ENSMUSG00000037827	6	128594931	128596409
Clec2j	ENSMUSG00000030363	6	128602456	128607050
Clec2h	ENSMUSG00000030364	6	128612404	128627389
Klrb1	ENSMUSG00000079299	6	128656526	128673064
Klrb1c	ENSMUSG00000030325	6	128728503	128739233
Klrb1b	ENSMUSG00000079298	6	128763724	128776349
BC035044	ENSMUSG00000090164	6	128798062	128841144
Clec2i	ENSMUSG00000030365	6	128837606	128848185
Clec2g	ENSMUSG00000000248	6	128884399	128970537
Klrb1f	ENSMUSG00000030154	6	128995919	129007489
Clec2e	ENSMUSG00000030155	6	129041850	129050934
Klrb1-ps1	ENSMUSG00000079295	6	129066536	129079464
Clec2d	ENSMUSG00000030157	6	129130633	129136552
Cd69	ENSMUSG00000030156	6	129217342	129225387
4922502D21Rik	ENSMUSG00000047720	6	129272183	129281814
Clec12a	ENSMUSG00000053063	6	129292709	129315321
Clec12b	ENSMUSG00000030158	6	129325533	129335521
Clec1a	ENSMUSG00000033082	6	129339308	129402018
Clec1b	ENSMUSG00000030159	6	129347315	129359353
Clec9a	ENSMUSG00000046080	6	129358880	129374780
Clec7a	ENSMUSG00000079293	6	129411611	129422790
Olr1	ENSMUSG00000030162	6	129435264	129457183
D630042F21Rik	ENSMUSG00000030160	6	129462575	129469245
Gabarapl1	ENSMUSG00000030161	6	129483218	129492349
Klre1	ENSMUSG00000050241	6	129527911	129535842
Klrd1	ENSMUSG00000030165	6	129541800	129548793
Klrk1	ENSMUSG00000030149	6	129560341	129573882
Klrc3	ENSMUSG00000033027	6	129588711	129593355
Klrc2	ENSMUSG00000052736	6	129597514	129610707
Klrc1	ENSMUSG00000030167	6	129616033	129628991
Klri1	ENSMUSG00000067610	6	129647236	129667150
Klri2	ENSMUSG00000043932	6	129679059	129690502
Gm156	ENSMUSG00000071158	6	129716586	129734288
Klra17	ENSMUSG00000014543	6	129781172	129826690
Gm17631	ENSMUSG00000092047	6	129812667	129814411
Klra5	ENSMUSG00000030173	6	129849014	129867668
Klra6	ENSMUSG00000061769	6	129963051	129976972
Klra4	ENSMUSG00000079852	6	129993749	130017289
Klra8	ENSMUSG00000089727	6	130065244	130079916
Gm11082	ENSMUSG00000079282	6	130090299	130093709
Klra9	ENSMUSG00000033024	6	130128771	130285823
Gm11081	ENSMUSG00000079281	6	130131767	130134749
Klra7	ENSMUSG00000067599	6	130168623	130183340
Klra10	ENSMUSG00000072718	6	130219212	130231946
Klra3	ENSMUSG00000067591	6	130273307	130287592
Klra1	ENSMUSG00000079853	6	130313936	130336892
Gm16186	ENSMUSG00000081935	6	128980855	128981694
Clec2f-ps	ENSMUSG00000089728	6	128968600	128970537
2310001H17Rik	ENSMUSG00000085930	6	129158430	129188000
Gm7309	ENSMUSG00000083848	6	129639636	129640216
Gm16242	ENSMUSG00000082069	6	129745488	129763954
Gm15854	ENSMUSG00000083120	6	129922398	129942862
Klra11	ENSMUSG00000072717	6	130032935	130044695
Klra14	ENSMUSG00000072721	6	130099124	130112587
Klra13-ps	ENSMUSG00000030178	6	130241179	130256450
Gm6584	ENSMUSG00000084204	6	130348290	130357951
Gm15861	ENSMUSG00000082777	6	130351575	130351913
Gm8724	ENSMUSG00000058700	6	128480936	128481322
Gm15987	ENSMUSG00000085786	6	128901222	128925047
Gm8778	ENSMUSG00000079223	6	128926884	128927990
BC064078	ENSMUSG00000087150	6	128942979	128958058
Gm16187	ENSMUSG00000082694	6	128955642	128957979
1700101I11Rik	ENSMUSG00000091870	6	129482112	129483290
Gm17395	ENSMUSG00000090617	6	128793804	128796977
U6	ENSMUSG00000088238	6	130126771	130126844
U6	ENSMUSG00000089383	6	130031437	130031511
U6	ENSMUSG00000088110	6	129847950	129848023
U6	ENSMUSG00000088003	6	130096899	130096972
Mir680-1	ENSMUSG00000076212	6	129641553	129641661
U7	ENSMUSG00000089590	6	129124838	129124900
U6	ENSMUSG00000088426	6	129961855	129961916
U6	ENSMUSG00000089474	6	130270892	130270965
U6	ENSMUSG00000088520	6	130063309	130063382
9330104G04Rik	ENSMUSG00000091869	7	17456703	17460235
Gm6065	ENSMUSG00000063830	7	18377923	18378414
Ceacam15	ENSMUSG00000078795	7	17256680	17261054
Ceacam9	ENSMUSG00000007209	7	17307278	17311459
Ap2s1	ENSMUSG00000008036	7	17323759	17334643
Slc1a5	ENSMUSG00000001918	7	17366695	17383623
Fkrp	ENSMUSG00000048920	7	17394619	17400478
Strn4	ENSMUSG00000030374	7	17401238	17426280
Prkd2	ENSMUSG00000041187	7	17428283	17455810
Dact3	ENSMUSG00000078794	7	17460666	17472650
Gng8	ENSMUSG00000063594	7	17477135	17480784
Ptgir	ENSMUSG00000043017	7	17491839	17496254
Calm3	ENSMUSG00000019370	7	17500728	17509463
Pnmal2	ENSMUSG00000070802	7	17530031	17532427
Pnmal1	ENSMUSG00000041141	7	17545144	17547668
Ccdc8	ENSMUSG00000041117	7	17578057	17582864
Ppp5c	ENSMUSG00000003099	7	17589989	17613273
Hif3a	ENSMUSG00000004328	7	17616856	17647776
Psg16	ENSMUSG00000066760	7	17659389	17718799
Ceacam3	ENSMUSG00000053228	7	17735631	17749602
Psg29	ENSMUSG00000023159	7	17788826	17801105
Psg-ps1	ENSMUSG00000090442	7	18257662	18267409
Ceacam5	ENSMUSG00000008789	7	18298601	18346475
Ceacam14	ENSMUSG00000023185	7	18397982	18401012
Gm5155	ENSMUSG00000078793	7	18457116	18504373
Ceacam11	ENSMUSG00000030368	7	18557473	18563905
Ceacam13	ENSMUSG00000057195	7	18595238	18604570
Ceacam12	ENSMUSG00000030366	7	18651278	18663335
Igfl3	ENSMUSG00000066756	7	18761843	18767211
Mill1	ENSMUSG00000054005	7	18830696	18851441
Psg18	ENSMUSG00000003505	7	18931157	18940356
Psg28	ENSMUSG00000030373	7	19007887	19017404
Psg26	ENSMUSG00000070799	7	19059932	19069498
Psg25	ENSMUSG00000070798	7	19105053	19117576
Psg27	ENSMUSG00000070797	7	19141864	19152654
Psg23	ENSMUSG00000074359	7	19191692	19201850
Psg21	ENSMUSG00000070796	7	19232003	19242074
Psg20	ENSMUSG00000063305	7	19259456	19271534
U6	ENSMUSG00000064689	7	17538744	17538850
AC151983.1	ENSMUSG00000076355	7	18771038	18771138
AC151601.1	ENSMUSG00000084614	7	18046672	18046781
AC150681.1	ENSMUSG00000093078	7	17295966	17296036
AC134475.1	ENSMUSG00000093207	7	18602601	18602701
AC138311.2	ENSMUSG00000077108	7	18196115	18196224
AC126443.1	ENSMUSG00000084594	7	18122326	18122435
U6	ENSMUSG00000065313	7	19134434	19134540
AC151412.1	ENSMUSG00000076332	7	19003188	19003282
U7	ENSMUSG00000089483	7	18846813	18846875
AC138311.1	ENSMUSG00000077083	7	18203519	18203628
Zfp710	ENSMUSG00000048897	7	87169700	87237637
Wdr93	ENSMUSG00000039099	7	86888049	86930836
Rlbp1	ENSMUSG00000039194	7	86519757	86531913
Idh2	ENSMUSG00000030541	7	87239732	87260278
Fanci	ENSMUSG00000039187	7	86536815	86595151
Mesp1	ENSMUSG00000030544	7	86937127	86938674
Mesp2	ENSMUSG00000030543	7	86955613	86958317
Anpep	ENSMUSG00000039062	7	86966689	86993096
Polg	ENSMUSG00000039176	7	86593677	86611248
Det1	ENSMUSG00000030610	7	85967848	85992122
Aen	ENSMUSG00000030609	7	86040740	86056095
Isg20	ENSMUSG00000039236	7	86058310	86065248
Rhcg	ENSMUSG00000030549	7	86738249	86762543
5730590G19Rik	ENSMUSG00000046591	7	86805082	86843020
Ap3s2	ENSMUSG00000063801	7	87020218	87065526
2610034B18Rik	ENSMUSG00000039043	7	87070247	87080245
Gm16936	ENSMUSG00000087186	7	86162939	86198209
AI854517	ENSMUSG00000085554	7	86645003	86679283
Gm17512	ENSMUSG00000090948	7	87061838	87065492
5430400D12Rik	ENSMUSG00000091217	7	87065641	87067407
Kif7	ENSMUSG00000050382	7	86842985	86859072
9330171B17Rik	ENSMUSG00000039133	7	86855257	86857243
Plin1	ENSMUSG00000030546	7	86866050	86877662
Gm16017	ENSMUSG00000082400	7	86557196	86557403
Pex11a	ENSMUSG00000030545	7	86880843	86888017
Acan	ENSMUSG00000030607	7	86198369	86259985
Hapln3	ENSMUSG00000030606	7	86260026	86275895
Mfge8	ENSMUSG00000030605	7	86278655	86293946
Abhd2	ENSMUSG00000039202	7	86418087	86510394
Ntrk3	ENSMUSG00000059146	7	85337248	85723294
Gm9885	ENSMUSG00000052629	7	85723716	85725920
Mrpl46	ENSMUSG00000030612	7	85920122	85928417
Mrps11	ENSMUSG00000030611	7	85928005	85937875
Mir7-2	ENSMUSG00000065609	7	86033163	86033259
7SK	ENSMUSG00000089453	7	86497374	86497631
AC110520.1	ENSMUSG00000092873	7	86178089	86178194
AC110903.1	ENSMUSG00000077059	7	87094073	87094168
Mir9-3	ENSMUSG00000093238	7	86650150	86650239
AC138376.1	ENSMUSG00000080603	7	86158911	86159001
Gm10698	ENSMUSG00000079884	9	33535831	33536436
A130066N16Rik	ENSMUSG00000053889	9	34725818	34737094
4930581F22Rik	ENSMUSG00000070315	9	34924313	34938507
Gm6762	ENSMUSG00000086984	9	35381221	35382248
Gm10105	ENSMUSG00000061932	9	35396663	35396935
Kirrel3	ENSMUSG00000032036	9	34293711	34844301
St3gal4	ENSMUSG00000032038	9	34854164	34924395
Dcps	ENSMUSG00000032040	9	34931993	34983646
Tirap	ENSMUSG00000032041	9	34992136	35007876
Srpr	ENSMUSG00000032042	9	35007760	35055558
Foxred1	ENSMUSG00000039048	9	35011791	35018640
Fam118b	ENSMUSG00000050471	9	35024550	35075390
Rpusd4	ENSMUSG00000032044	9	35075450	35085316
Gm5614	ENSMUSG00000066771	9	35089103	35089420
Cdon	ENSMUSG00000038119	9	35228713	35315236
Ddx25	ENSMUSG00000032101	9	35349433	35366055
Pus3	ENSMUSG00000032103	9	35366180	35374768
Hyls1	ENSMUSG00000050555	9	35368405	35377688
Pate2	ENSMUSG00000074452	9	35377869	35497903
Pate4	ENSMUSG00000032099	9	35414678	35419520
Gm17365	ENSMUSG00000090858	9	35453647	35455704
Gm17252	ENSMUSG00000091215	9	35492664	35494956
Gm17346	ENSMUSG00000091603	9	34396111	34396889
U1	ENSMUSG00000065934	9	35282470	35282631
5S_rRNA	ENSMUSG00000088605	9	35311173	35311280
5S_rRNA	ENSMUSG00000089465	9	34767604	34767733
SNORA48	ENSMUSG00000088056	9	34952221	34952364
SNORA17	ENSMUSG00000088905	9	33725077	33725207
Gm17677	ENSMUSG00000091174	9	35548634	35549837
Gm17727	ENSMUSG00000090738	9	35584198	35585470
D730048I06Rik	ENSMUSG00000032108	9	35585618	35597697
9230110F15Rik	ENSMUSG00000047980	9	35645914	35651735
9230113P08Rik	ENSMUSG00000078934	9	35716008	35718381
Gm5916	ENSMUSG00000091411	9	35927519	35936364
Gm3867	ENSMUSG00000066767	9	36064643	36065908
Tpt1-ps5	ENSMUSG00000059252	9	37504100	37504618
Olfr892-ps1	ENSMUSG00000058521	9	37997312	37998237
Olfr908	ENSMUSG00000063732	9	38323619	38324550
BC024479	ENSMUSG00000042138	9	37296906	37331733
Esam	ENSMUSG00000001946	9	37335663	37345904
Vsig2	ENSMUSG00000001943	9	37346840	37351790
Nrgn	ENSMUSG00000053310	9	37352078	37360330
Spa17	ENSMUSG00000001948	9	37410886	37421199
Siae	ENSMUSG00000001942	9	37421432	37455903
Tbrg1	ENSMUSG00000011114	9	37456767	37464897
Panx3	ENSMUSG00000011118	9	37467487	37476807
Olfr151	ENSMUSG00000061165	9	37518857	37538646
Olfr874	ENSMUSG00000063350	9	37553721	37554727
Olfr875	ENSMUSG00000058628	9	37580222	37581225
Olfr876	ENSMUSG00000066750	9	37611474	37612521
Olfr877	ENSMUSG00000066749	9	37662405	37663340
Olfr145	ENSMUSG00000066748	9	37704910	37705960
Olfr878	ENSMUSG00000066747	9	37726133	37727197
Olfr881	ENSMUSG00000060583	9	37800077	37801024
Olfr883	ENSMUSG00000062841	9	37833393	37834322
Olfr884	ENSMUSG00000058130	9	37854809	37855895
Olfr885	ENSMUSG00000057029	9	37868907	37869836
Olfr887	ENSMUSG00000059942	9	37892423	37893352
Olfr888	ENSMUSG00000059275	9	37916273	37917217
Olfr889	ENSMUSG00000062211	9	37923277	37924312
Olfr890	ENSMUSG00000061096	9	37950722	37951666
Olfr891	ENSMUSG00000045528	9	37987456	37988406
Olfr893	ENSMUSG00000070312	9	38016637	38017578
Olfr894	ENSMUSG00000070311	9	38026403	38027351
Olfr143	ENSMUSG00000070310	9	38061004	38061945
Olfr895	ENSMUSG00000070309	9	38076100	38077050
Olfr25	ENSMUSG00000058270	9	38137077	38138144
Olfr898	ENSMUSG00000060101	9	38156670	38157620
Olfr250	ENSMUSG00000049864	9	38175133	38176128
Olfr251	ENSMUSG00000062388	9	38185468	38186418
Olfr147	ENSMUSG00000049098	9	38209305	38211414
Olfr901	ENSMUSG00000052058	9	38237869	38238804
Olfr902	ENSMUSG00000049334	9	38256377	38257432
Olfr904	ENSMUSG00000051620	9	38271628	38272560
Olfr905	ENSMUSG00000046455	9	38280334	38281266
Olfr906	ENSMUSG00000039962	9	38295616	38296551
Olfr907	ENSMUSG00000045066	9	38306256	38307188
Olfr911-ps1	ENSMUSG00000062621	9	38331315	38332254
Olfr910	ENSMUSG00000057444	9	38345467	38347414
Olfr912	ENSMUSG00000060114	9	38387829	38389796
Olfr913	ENSMUSG00000059189	9	38400388	38402746
Olfr914	ENSMUSG00000047050	9	38414052	38415002
Olfr916	ENSMUSG00000064113	9	38465043	38465975
Olfr917	ENSMUSG00000063225	9	38472498	38473427
Olfr918	ENSMUSG00000046150	9	38480089	38481066
Olfr919	ENSMUSG00000056961	9	38505014	38505961
Vwa5a	ENSMUSG00000023186	9	38525853	38550922
Olfr920	ENSMUSG00000061039	9	38560381	38564448
Olfr921	ENSMUSG00000049926	9	38580673	38583939
Olfr922	ENSMUSG00000043911	9	38622993	38624124
Olfr923	ENSMUSG00000044798	9	38635200	38636267
Olfr924	ENSMUSG00000062103	9	38655701	38656627
Olfr26	ENSMUSG00000047667	9	38662645	38663575
Olfr926	ENSMUSG00000064333	9	38684711	38685761
Olfr930	ENSMUSG00000063221	9	38737676	38738774
Olfr933	ENSMUSG00000058515	9	38783236	38784238
Olfr934	ENSMUSG00000057424	9	38789695	38790627
Olfr935	ENSMUSG00000059595	9	38802092	38803018
Olfr146	ENSMUSG00000058820	9	38826144	38827204
Olfr937	ENSMUSG00000047724	9	38867314	38868249
Olfr938	ENSMUSG00000048501	9	38885283	38886401
Olfr27	ENSMUSG00000049708	9	38935752	38952657
Olfr943	ENSMUSG00000062149	9	38991765	38992709
Olfr944	ENSMUSG00000060905	9	39024944	39025879
Olfr1537-ps1	ENSMUSG00000063670	9	39045072	39046016
Olfr945	ENSMUSG00000063380	9	39065305	39066267
Olfr948	ENSMUSG00000057349	9	39126232	39127197
Olfr951	ENSMUSG00000060129	9	39201378	39202322
Olfr952	ENSMUSG00000058856	9	39233678	39234733
Olfr954	ENSMUSG00000064173	9	39269018	39269962
Olfr955	ENSMUSG00000063176	9	39277365	39278309
Olfr44	ENSMUSG00000062649	9	39291789	39301573
SNORA17	ENSMUSG00000077240	9	38318758	38318881
U2	ENSMUSG00000065620	9	37630171	37630369
CT025680.1	ENSMUSG00000078003	9	38856143	38856234
AC073947.1	ENSMUSG00000093152	9	38882996	38883079
Olfr957	ENSMUSG00000042949	9	39318368	39319303
SNORA17	ENSMUSG00000077427	9	39345411	39345537
Olfr958	ENSMUSG00000050853	9	39357513	39358454
Olfr959	ENSMUSG00000059366	9	39379845	39380899
Gm16759	ENSMUSG00000086539	9	63247188	63416498
Gm6257	ENSMUSG00000091866	9	63290973	63291882
1700055C04Rik	ENSMUSG00000093616	9	63886272	63889272
2600006L11Rik	ENSMUSG00000093759	9	63928568	63934768
Gm16218	ENSMUSG00000059571	9	65145339	65145726
Kbtbd13	ENSMUSG00000054978	9	65237944	65239459
Iqch	ENSMUSG00000037801	9	63269262	63450300
Aagab	ENSMUSG00000037257	9	63450462	63489696
Smad3	ENSMUSG00000032402	9	63494574	63605801
Smad6	ENSMUSG00000036867	9	63800883	63869866
Lctl	ENSMUSG00000032401	9	63964954	63985925
Zwilch	ENSMUSG00000032400	9	63984951	64020911
Rpl4	ENSMUSG00000032399	9	64021194	64026369
Snapc5	ENSMUSG00000032398	9	64027104	64030491
Map2k1	ENSMUSG00000004936	9	64033577	64101438
Ptplad1	ENSMUSG00000033629	9	64834792	64869524
1110036E04Rik	ENSMUSG00000086106	9	63897636	63901907
Clpx	ENSMUSG00000015357	9	65142067	65178465
Pdcd7	ENSMUSG00000041837	9	65193875	65207450
Gm514	ENSMUSG00000086228	9	65208867	65228184
Rasl12	ENSMUSG00000041696	9	65246295	65262660
Rab11a	ENSMUSG00000004771	9	64563106	64585565
2010321M09Rik	ENSMUSG00000034263	9	64808639	64834781
Parp16	ENSMUSG00000032392	9	65062497	65087026
Cilp	ENSMUSG00000042254	9	65112987	65128413
Igdcc3	ENSMUSG00000032394	9	64988961	65033664
Dennd4a	ENSMUSG00000053641	9	64659147	64767474
Dpp8	ENSMUSG00000032393	9	64880265	64930457
Igdcc4	ENSMUSG00000032816	9	64949293	64985747
Slc24a1	ENSMUSG00000034452	9	64770668	64799414
Uchl4	ENSMUSG00000035337	9	64083008	64084169
Tipin	ENSMUSG00000032397	9	64129414	64152599
Dis3l	ENSMUSG00000032396	9	64154564	64189095
Megf11	ENSMUSG00000036466	9	64233433	64557012
SCARNA14	ENSMUSG00000088254	9	64143738	64143872
AC110235.1	ENSMUSG00000093316	9	65181085	65181318
AC122057.1	ENSMUSG00000093137	9	63290126	63290267
SNORD16	ENSMUSG00000065359	9	64024468	64024566
U5	ENSMUSG00000075930	9	65049533	65049648
SNORD18	ENSMUSG00000064514	9	64024930	64025000
U5	ENSMUSG00000075763	9	65044379	65044494
AC122463.1	ENSMUSG00000093119	9	64819476	64819600
AC160118.1	ENSMUSG00000093239	9	64073330	64073456
Snord16a	ENSMUSG00000065829	9	64023230	64023328
SNORD18	ENSMUSG00000065752	9	64022855	64022922
5S_rRNA	ENSMUSG00000088988	9	63896303	63896397
SNORD18	ENSMUSG00000064918	9	64023678	64023748
AC161366.1	ENSMUSG00000089574	9	64989093	64989163
SNORA17	ENSMUSG00000089336	9	64729591	64729732
Ostb	ENSMUSG00000053862	9	65260560	65270580
Mtfmt	ENSMUSG00000059183	9	65283589	65300861
Spg21	ENSMUSG00000032388	9	65308744	65336277
Irak1bp1	ENSMUSG00000032251	9	82723413	82741295
Phip	ENSMUSG00000032253	9	82759766	82869096
Hmgn3	ENSMUSG00000066456	9	83003555	83040292
Lca5	ENSMUSG00000032258	9	83283900	83334734
Lca5	ENSMUSG00000090403	9	83284216	83286185
Gm17498	ENSMUSG00000092026	9	83303183	83303530
Rps27a-ps2	ENSMUSG00000058838	9	83303245	83303770
Sh3bgrl2	ENSMUSG00000032261	9	83441934	83532408
Elovl4	ENSMUSG00000032262	9	83672300	83699912
Ttk	ENSMUSG00000038379	9	83728296	83765997
Gm5919	ENSMUSG00000090522	9	83775821	83779657
Bckdhb	ENSMUSG00000032263	9	83818757	84017846
U6	ENSMUSG00000088760	9	82356963	82357059
U6	ENSMUSG00000064469	9	83831976	83832082
SNORA17	ENSMUSG00000077415	9	82141455	82141585
U1	ENSMUSG00000077666	9	84081962	84082146
U7	ENSMUSG00000089066	9	82333021	82333081
Cnksr3	ENSMUSG00000015202	10	3134304	3227478
Ipcef1	ENSMUSG00000064065	10	3294063	3460745
Oprm1	ENSMUSG00000000766	10	3308332	3588035
Gm10945	ENSMUSG00000078488	10	3584780	3605912
Gm15536	ENSMUSG00000081926	10	3307767	3307880
Rgs17	ENSMUSG00000019775	10	4424141	4520878
Mtrf1l	ENSMUSG00000019774	10	4522631	4534654
Fbxo5	ENSMUSG00000019773	10	4540941	4547381
Vip	ENSMUSG00000019772	10	4698927	4707323
Myct1	ENSMUSG00000046916	10	4739754	4752813
Syne1	ENSMUSG00000019769	10	4795849	5326338
Gm10097	ENSMUSG00000061261	10	5277031	5277348
Esr1	ENSMUSG00000019768	10	5340927	5734948
AC161829.1	ENSMUSG00000093189	10	5310085	5310366
U6	ENSMUSG00000077596	10	4989262	4989368
AC162387.1	ENSMUSG00000092769	10	4659162	4659257
Gm16153	ENSMUSG00000085687	10	5923172	5937508
Gm221	ENSMUSG00000019767	10	5784310	5864039
1700052N19Rik	ENSMUSG00000061759	10	5891400	5914074
Rmnd1	ENSMUSG00000019763	10	5914153	5944626
Zbtb2	ENSMUSG00000075327	10	5958433	5979467
Akap12	ENSMUSG00000038587	10	5987073	6080212
Mthfd1l	ENSMUSG00000040675	10	6179460	6373423
SNORD88	ENSMUSG00000084430	10	5570951	5571041
U1	ENSMUSG00000065371	10	5862148	5862307
U8	ENSMUSG00000089473	10	6176523	6176654
U1	ENSMUSG00000065792	10	6242072	6242228
RNase_MRP	ENSMUSG00000088375	10	5778328	5778567
Gm16074	ENSMUSG00000082247	10	6353727	6354170
Plekhg1	ENSMUSG00000040624	10	6379238	6606177
Gm16148	ENSMUSG00000082605	10	6399450	6400342
Gm16149	ENSMUSG00000082123	10	6476934	6477242
5S_rRNA	ENSMUSG00000089392	10	6411664	6411772
Gm16254	ENSMUSG00000087350	10	7325882	7326611
Iyd	ENSMUSG00000019762	10	6791664	6806301
Ppp1r14c	ENSMUSG00000040653	10	6881566	6980391
H60c	ENSMUSG00000091618	10	7078791	7088611
9230019H11Rik	ENSMUSG00000071434	10	7216995	7226702
Lrp11	ENSMUSG00000019796	10	7309598	7345281
Pcmt1	ENSMUSG00000019795	10	7349171	7400934
Nup43	ENSMUSG00000040034	10	7387301	7398679
Lats1	ENSMUSG00000040021	10	7401007	7436256
Katna1	ENSMUSG00000019794	10	7445798	7482948
Gm16760	ENSMUSG00000086086	10	6979406	6982468
AC155833.1	ENSMUSG00000080655	10	6921426	6921518
Gm20470	ENSMUSG00000092190	10	7463318	7480897
Bpifc	ENSMUSG00000050108	10	85422085	85474640
Fbxo7	ENSMUSG00000001786	10	85484717	85514618
Syn3	ENSMUSG00000059602	10	85517870	85961641
Timp3	ENSMUSG00000020044	10	85763117	85812251
Gm6729	ENSMUSG00000090816	10	86002628	86004079
Ascl4	ENSMUSG00000085111	10	85391236	85408951
4930486F22Rik	ENSMUSG00000085435	10	85558630	85576325
Gm15990	ENSMUSG00000087256	10	85588572	85592599
Tcp11l2	ENSMUSG00000020034	10	84039371	84077104
Polr3b	ENSMUSG00000034453	10	84085182	84189922
Rfx4	ENSMUSG00000020037	10	84218807	84369283
Gm6713	ENSMUSG00000090414	10	85172072	85173517
Gm6721	ENSMUSG00000090676	10	85270560	85271990
Pwp1	ENSMUSG00000001785	10	85334576	85351841
Prdm4	ENSMUSG00000035529	10	85354715	85379887
Gm17249	ENSMUSG00000090905	10	84082077	84085323
Gm6613	ENSMUSG00000063986	10	84256895	84257452
Ric8b	ENSMUSG00000035620	10	84380361	84479191
Fhl4	ENSMUSG00000050035	10	84559764	84565240
AI597468	ENSMUSG00000060935	10	84565372	84580492
Mterfd3	ENSMUSG00000049038	10	84582181	84590746
Cry1	ENSMUSG00000020038	10	84594447	84647799
Gm8394	ENSMUSG00000050490	10	84776220	84777184
Btbd11	ENSMUSG00000020042	10	84849559	85123037
D10Wsu52e	ENSMUSG00000001783	10	85401382	85420568
SNORA73	ENSMUSG00000087811	10	85560717	85560903
U6	ENSMUSG00000089451	10	84273832	84273928
U7	ENSMUSG00000088247	10	84526620	84526676
U6	ENSMUSG00000089096	10	84077464	84077558
AC100386.1	ENSMUSG00000087895	10	84796646	84796749
U6	ENSMUSG00000077265	10	85501430	85501533
Gm5174	ENSMUSG00000090308	10	86118684	86120126
Hsp90b1	ENSMUSG00000020048	10	86152954	86168254
BC030307	ENSMUSG00000044937	10	86168556	86239588
Nt5dc3	ENSMUSG00000054027	10	86241750	86301134
Stab2	ENSMUSG00000035459	10	86303943	86470770
1700113H08Rik	ENSMUSG00000047129	10	86520791	86693344
Gm10764	ENSMUSG00000074810	10	86752238	86754572
Ascl1	ENSMUSG00000020052	10	86953564	86956405
Pah	ENSMUSG00000020051	10	86984540	87046881
Gm15344	ENSMUSG00000084899	10	86154864	86155840
Fabp3-ps1	ENSMUSG00000056366	10	86194732	86195133
Gm16268	ENSMUSG00000089959	10	86301839	86337699
Gm16280	ENSMUSG00000089881	10	86371506	86372758
Gm16270	ENSMUSG00000089775	10	86372224	86375461
Gm16271	ENSMUSG00000089656	10	86434961	86490760
Gm16269	ENSMUSG00000089666	10	86463042	86463450
1810014B01Rik	ENSMUSG00000085814	10	86148346	86157551
U6	ENSMUSG00000070256	10	86826785	86826891
AC112790.1	ENSMUSG00000080679	10	86308556	86308653
AC152453.1	ENSMUSG00000092686	10	86168061	86168193
Igf1	ENSMUSG00000020053	10	87321010	87399792
Pmch	ENSMUSG00000035383	10	87553817	87555120
4930547N16Rik	ENSMUSG00000035365	10	87554177	87609686
Nup37	ENSMUSG00000035351	10	87609737	87641133
Gm16176	ENSMUSG00000058934	10	87289122	87326126
U6atac	ENSMUSG00000088843	10	87627704	87627818
Ccdc53	ENSMUSG00000020056	10	87663842	87708897
Dram1	ENSMUSG00000020057	10	87785549	87841825
Gnptab	ENSMUSG00000035311	10	87841877	87910074
Gm17338	ENSMUSG00000091432	10	87841989	87846456
Chpt1	ENSMUSG00000060002	10	87915490	87966818
Sycp3	ENSMUSG00000020059	10	87922314	87935981
Gm16235	ENSMUSG00000087429	10	87906981	87912632
Mybpc1	ENSMUSG00000020061	10	87981024	88067897
Spic	ENSMUSG00000004359	10	88137517	88147760
Arl1	ENSMUSG00000060904	10	88193603	88206839
Gm4925	ENSMUSG00000069540	10	88192286	88193846
n-R5s79	ENSMUSG00000065005	10	88172753	88172872
Utp20	ENSMUSG00000004356	10	88209352	88289559
Slc5a8	ENSMUSG00000020062	10	88348737	88392250
Ano4	ENSMUSG00000035189	10	88411740	88720535
Gas2l3	ENSMUSG00000074802	10	88871568	88906712
Nr1h4	ENSMUSG00000047638	10	88916979	88996330
Slc17a8	ENSMUSG00000019935	10	89036765	89083998
Scyl2	ENSMUSG00000069539	10	89101466	89149030
Actr6	ENSMUSG00000019948	10	89174718	89195040
Uhrf1bp1l	ENSMUSG00000019951	10	89207736	89282614
Anks1b	ENSMUSG00000058589	10	89336417	90435730
Gm17277	ENSMUSG00000091581	10	88798305	88807507
1500026H17Rik	ENSMUSG00000087686	10	89149116	89163611
U6	ENSMUSG00000064402	10	89284085	89284191
AC130216.1	ENSMUSG00000092642	10	89187495	89187620
Ppfia2	ENSMUSG00000053825	10	105902321	106370502
Acss3	ENSMUSG00000035948	10	106373220	106560724
Lin7a	ENSMUSG00000019906	10	106708899	106862199
Myf5	ENSMUSG00000000435	10	106919964	106923190
Myf6	ENSMUSG00000035923	10	106929916	106931785
Ptprq	ENSMUSG00000035916	10	106954416	107157083
Otogl	ENSMUSG00000091455	10	107199369	107349190
Ppp1r12a	ENSMUSG00000019907	10	107599249	107714631
Pawr	ENSMUSG00000035873	10	107769245	107851447
AC147634.1	ENSMUSG00000093762	10	107865123	107865216
SNORA17	ENSMUSG00000088465	10	106574030	106574114
SNORA38	ENSMUSG00000065653	10	107800721	107800854
Syt1	ENSMUSG00000035864	10	107934706	108448038
Nav3	ENSMUSG00000020181	10	109119716	109437275
U6	ENSMUSG00000065802	10	108805144	108805249
7SK	ENSMUSG00000088554	10	108527054	108527331
4930473D10Rik	ENSMUSG00000089934	10	114194803	114222160
Gm15723	ENSMUSG00000084865	10	114238782	114253887
Trhde	ENSMUSG00000050663	10	113835879	114239363
Tph2	ENSMUSG00000006764	10	114515697	114622078
Tbc1d15	ENSMUSG00000020130	10	114634933	114688549
Rab21	ENSMUSG00000020132	10	114726919	114752647
Tmem19	ENSMUSG00000069520	10	114777795	114799318
7SK	ENSMUSG00000084501	10	114347767	114348091
7SK	ENSMUSG00000087853	10	114694680	114694985
U6	ENSMUSG00000065696	10	114428597	114428703
Thap2	ENSMUSG00000020137	10	114807022	114821491
Zfc3h1	ENSMUSG00000034163	10	114822015	114869828
Slc16a7	ENSMUSG00000020102	10	124663520	124766019
Lrig3	ENSMUSG00000020105	10	125403275	125452415
Xrcc6bp1	ENSMUSG00000025436	10	126305486	126338427
Ctdsp2	ENSMUSG00000078429	10	126415773	126437031
Arhgef25	ENSMUSG00000019467	10	126619577	126627110
March9	ENSMUSG00000040502	10	126492067	126497240
Dctn2	ENSMUSG00000025410	10	126703442	126718862
F420014N23Rik	ENSMUSG00000086597	10	126632305	126639699
Fam119b	ENSMUSG00000080115	10	126468238	126478569
Mettl1	ENSMUSG00000006732	10	126478470	126483421
Avil	ENSMUSG00000025432	10	126437765	126458050
Cdk4	ENSMUSG00000006728	10	126500590	126504976
Os9	ENSMUSG00000040462	10	126531315	126558216
Pip4k2c	ENSMUSG00000025417	10	126634123	126648678
Kif5a	ENSMUSG00000074657	10	126662755	126700136
Dtx3	ENSMUSG00000040415	10	126627434	126632784
B4galnt1	ENSMUSG00000006731	10	126602247	126609385
Slc26a10	ENSMUSG00000040441	10	126608449	126617701
Tspan31	ENSMUSG00000006736	10	126504373	126507317
Agap2	ENSMUSG00000025422	10	126515963	126530225
Cyp27b1	ENSMUSG00000006724	10	126485306	126490062
Tsfm	ENSMUSG00000040521	10	126448628	126467896
Mir26a-2	ENSMUSG00000065430	10	126432586	126432669
SNORA17	ENSMUSG00000089550	10	126277431	126277557
AC153489.1	ENSMUSG00000093161	10	125473883	125473955
Mir546	ENSMUSG00000072837	10	126435496	126435616
U6atac	ENSMUSG00000088672	10	126575585	126575673
Gm20492	ENSMUSG00000092593	10	126725570	126726737
Gm4189	ENSMUSG00000092384	10	126726752	126727844
Gli1	ENSMUSG00000025407	10	126766945	126778645
Mbd6	ENSMUSG00000025409	10	126719012	126726074
Ddit3	ENSMUSG00000025408	10	126727830	126733344
Inhbe	ENSMUSG00000047492	10	126786458	126788828
Inhbc	ENSMUSG00000025405	10	126793384	126807600
Arhgap9	ENSMUSG00000040345	10	126759172	126766999
R3hdm2	ENSMUSG00000025404	10	126817383	126936440
Mars	ENSMUSG00000040354	10	126733277	126748842
U6	ENSMUSG00000089369	10	126841340	126841448
Gm12124	ENSMUSG00000082688	11	35606283	35606961
Gm12125	ENSMUSG00000081571	11	35809556	35810291
Gm12126	ENSMUSG00000087245	11	35894166	35897356
Gm12127	ENSMUSG00000086375	11	36091543	36093489
Slit3	ENSMUSG00000056427	11	34934726	35522009
Pank3	ENSMUSG00000018846	11	35582986	35604787
Fbll1	ENSMUSG00000051062	11	35610883	35612386
Rars	ENSMUSG00000018848	11	35621883	35648008
Wwc1	ENSMUSG00000018849	11	35651902	35794029
Odz2	ENSMUSG00000049336	11	35820158	37049466
Mir103-1	ENSMUSG00000065553	11	35595898	35595983
U6	ENSMUSG00000065173	11	36536384	36536489
AL731688.1	ENSMUSG00000092992	11	35533215	35533284
Gm12128	ENSMUSG00000087388	11	37472491	37486668
AL808020.1	ENSMUSG00000093184	11	37850681	37850765
Gm12145	ENSMUSG00000085951	11	42919642	42929796
Gm12146	ENSMUSG00000085533	11	43010926	43073286
Gm12144	ENSMUSG00000086170	11	43043065	43045766
Gm12147	ENSMUSG00000086791	11	43073293	43124590
Gm12148	ENSMUSG00000084889	11	43198984	43200685
Gm12151	ENSMUSG00000084307	11	43276698	43276987
Gm12150	ENSMUSG00000085239	11	43393104	43394618
Gm12149	ENSMUSG00000082614	11	43428619	43429831
Gm12152	ENSMUSG00000083662	11	43484303	43484986
Gm12153	ENSMUSG00000087172	11	43772591	43948489
Gm12154	ENSMUSG00000086738	11	44079065	44080711
Gm12155	ENSMUSG00000082790	11	44200617	44200776
Gm12157	ENSMUSG00000083521	11	44231451	44232198
Gm12156	ENSMUSG00000082750	11	44292709	44293711
4930597A21Rik	ENSMUSG00000086501	11	44399819	44404731
Ebf1	ENSMUSG00000078561	11	44430819	44431275
Gm12158	ENSMUSG00000085784	11	44473024	44476178
Gm9972	ENSMUSG00000055456	11	42849248	42850780
Atp10b	ENSMUSG00000055415	11	42963379	43075787
Pttg1	ENSMUSG00000020415	11	43233752	43239753
Slu7	ENSMUSG00000020409	11	43247246	43261483
C1qtnf2	ENSMUSG00000046491	11	43287778	43305027
Ccnjl	ENSMUSG00000044707	11	43342286	43400499
4933415A04Rik	ENSMUSG00000045877	11	43400542	43402550
Fabp6	ENSMUSG00000020405	11	43409551	43415042
Pwwp2a	ENSMUSG00000044950	11	43495500	43534993
Ttc1	ENSMUSG00000041278	11	43543014	43561510
Adra1b	ENSMUSG00000050541	11	43588108	43714712
Il12b	ENSMUSG00000004296	11	44213565	44227535
Ublcp1	ENSMUSG00000041231	11	44268073	44284000
Rnf145	ENSMUSG00000019189	11	44332466	44379022
Ebf1	ENSMUSG00000057098	11	44430819	44821593
7SK	ENSMUSG00000084627	11	42710997	42711308
Mir146	ENSMUSG00000065601	11	43187899	43187963
AL669944.1	ENSMUSG00000092889	11	44282515	44282568
Ube2b	ENSMUSG00000020390	11	51798999	51814264
Cdkl3	ENSMUSG00000020389	11	51817723	51903286
Ppp2ca	ENSMUSG00000020349	11	51912183	51941280
Olfr1373	ENSMUSG00000062204	11	51958095	51959030
Olfr1371	ENSMUSG00000060170	11	52026552	52027489
Skp1a	ENSMUSG00000036309	11	52045497	52060360
Tcf7	ENSMUSG00000000782	11	52065873	52096681
Vdac1	ENSMUSG00000020402	11	52174362	52202899
9530068E07Rik	ENSMUSG00000036275	11	52209930	52222230
Fstl4	ENSMUSG00000036264	11	52578136	53002040
Hspa4	ENSMUSG00000020361	11	53073316	53113959
Zcchc10	ENSMUSG00000018239	11	53138181	53146803
Aff4	ENSMUSG00000049470	11	53164335	53235332
Leap2	ENSMUSG00000036216	11	53235683	53236672
Uqcrq	ENSMUSG00000044894	11	53241424	53244333
Gdf9	ENSMUSG00000018238	11	53244525	53251406
Gm10447	ENSMUSG00000072963	11	53268306	53270612
Shroom1	ENSMUSG00000018387	11	53270707	53281268
Gm9837	ENSMUSG00000049427	11	53283251	53283981
Sowaha	ENSMUSG00000044352	11	53290075	53293776
Gm9945	ENSMUSG00000054450	11	53293668	53294599
Sept8	ENSMUSG00000018398	11	53332759	53363067
Kif3a	ENSMUSG00000018395	11	53380881	53417746
Il4	ENSMUSG00000000869	11	53416484	53432171
Il13	ENSMUSG00000020383	11	53444826	53448204
Rad50	ENSMUSG00000020380	11	53463021	53520821
Il5	ENSMUSG00000036117	11	53534296	53538608
Irf1	ENSMUSG00000018899	11	53583516	53591876
Gm17334	ENSMUSG00000091191	11	53585783	53586689
Gm12216	ENSMUSG00000081769	11	53596920	53672758
Gm11006	ENSMUSG00000078860	11	53606266	53606378
Slc22a5	ENSMUSG00000018900	11	53678044	53705162
Slc22a21	ENSMUSG00000063652	11	53763467	53793834
Slc22a4	ENSMUSG00000020334	11	53796625	53841592
Gm16953	ENSMUSG00000087101	11	51763384	52083016
Gm12204	ENSMUSG00000086493	11	51814355	51815413
Gm12205	ENSMUSG00000084800	11	51852352	51852973
Olfr1372-ps1	ENSMUSG00000084141	11	51968880	51969785
Gm12206	ENSMUSG00000083175	11	52002455	52003055
Gm12207	ENSMUSG00000086920	11	52047226	52050121
A630014C17Rik	ENSMUSG00000086395	11	52089557	52099681
Gm12208	ENSMUSG00000080951	11	52218818	52218980
Gm12209	ENSMUSG00000081297	11	52292010	52292605
Gm12210	ENSMUSG00000083129	11	52300660	52300812
Gm11187	ENSMUSG00000083442	11	52496281	52496726
Gm11186	ENSMUSG00000087668	11	52924953	52933558
Gm11189	ENSMUSG00000058073	11	53014186	53014560
Gm11188	ENSMUSG00000082263	11	53158792	53159179
Gm12212	ENSMUSG00000085707	11	53275881	53277115
Rpl9-ps3	ENSMUSG00000085718	11	53314686	53315264
A430108G06Rik	ENSMUSG00000086851	11	53378190	53380815
Rps2-ps4	ENSMUSG00000084373	11	53459246	53459878
Gm12214	ENSMUSG00000086595	11	53537455	53538120
Gm12213	ENSMUSG00000083986	11	53547081	53547433
Gm12217	ENSMUSG00000082271	11	53715692	53717070
Gm12218	ENSMUSG00000082380	11	53716259	53716657
Gm12220	ENSMUSG00000081098	11	53742807	53742978
Gm12219	ENSMUSG00000080768	11	53780565	53781007
Gm17500	ENSMUSG00000092028	11	51938032	51941281
7SK	ENSMUSG00000084419	11	53514681	53514990
AL935177.1	ENSMUSG00000093006	11	51912560	51912655
Mir3061	ENSMUSG00000092870	11	51940248	51940338
U6	ENSMUSG00000064719	11	53203904	53204010
Pdlim4	ENSMUSG00000020388	11	53868430	53882516
P4ha2	ENSMUSG00000018906	11	53913597	53945167
Gm12221	ENSMUSG00000036045	11	53972428	53973558
4933405E24Rik	ENSMUSG00000086209	11	53991274	54026787
Csf2	ENSMUSG00000018916	11	54060773	54063169
Il3	ENSMUSG00000018914	11	54078805	54080779
Acsl6	ENSMUSG00000020333	11	54117300	54178258
4930404A10Rik	ENSMUSG00000020332	11	54184154	54240292
Fnip1	ENSMUSG00000035992	11	54251701	54331737
Rapgef6	ENSMUSG00000037533	11	54336349	54512787
Cdc42se2	ENSMUSG00000052298	11	54530958	54601177
Lyrm7	ENSMUSG00000020268	11	54640368	54674418
Hint1	ENSMUSG00000020267	11	54679885	54684003
Gpx3	ENSMUSG00000018339	11	54715955	54723879
Tnip1	ENSMUSG00000020400	11	54724289	54776419
Anxa6	ENSMUSG00000018340	11	54792610	54846947
Ccdc69	ENSMUSG00000049588	11	54863233	54891633
Gm2a	ENSMUSG00000000594	11	54911617	54926531
Slc36a3	ENSMUSG00000049491	11	54938317	54965210
Slc36a2	ENSMUSG00000020264	11	54971972	54998579
Slc36a1	ENSMUSG00000020261	11	55017852	55049832
Fat2	ENSMUSG00000055333	11	55064111	55150066
Sparc	ENSMUSG00000018593	11	55208002	55233582
Atox1	ENSMUSG00000018585	11	55260143	55274741
G3bp1	ENSMUSG00000018583	11	55283187	55318340
Glra1	ENSMUSG00000000263	11	55327740	55421700
Gm12222	ENSMUSG00000060068	11	54012932	54013194
Gm12223	ENSMUSG00000085585	11	54061102	54067997
Gm12224	ENSMUSG00000085888	11	54153871	54166981
Gm12226	ENSMUSG00000078151	11	54214594	54215469
Gm12225	ENSMUSG00000084212	11	54217642	54217939
Gm12227	ENSMUSG00000086039	11	54542179	54547825
Gm12229	ENSMUSG00000082503	11	54559859	54560326
Gm12228	ENSMUSG00000086789	11	54633421	54638469
Gm12230	ENSMUSG00000082180	11	54760937	54761390
Gm12231	ENSMUSG00000044751	11	54931603	54932297
Mup-ps22	ENSMUSG00000080738	11	54937197	54937439
Gm12233	ENSMUSG00000085531	11	54950546	54953695
4921508A21Rik	ENSMUSG00000084980	11	55005221	55011366
Gm12234	ENSMUSG00000082257	11	55201089	55201651
Gm12235	ENSMUSG00000081107	11	55277342	55277511
Gm12238	ENSMUSG00000087342	11	55296208	55296331
Gm12236	ENSMUSG00000086460	11	55328348	55341217
Gm12237	ENSMUSG00000083363	11	55368442	55368911
Gm12239	ENSMUSG00000086020	11	55585590	55884350
SNORA29	ENSMUSG00000065061	11	55296196	55296335
AL607091.1	ENSMUSG00000093341	11	54471999	54472075
U6	ENSMUSG00000088437	11	54271664	54271771
U1	ENSMUSG00000088231	11	54643213	54643382
Nmur2	ENSMUSG00000037393	11	55838489	55854512
Gm12240	ENSMUSG00000084169	11	56076357	56076585
snoR38	ENSMUSG00000065635	11	56076667	56076742
Gm12241	ENSMUSG00000081749	11	56272851	56273576
SNORA70	ENSMUSG00000088228	11	56296451	56296546
Gria1	ENSMUSG00000020524	11	56824889	57143746
Fam114a2	ENSMUSG00000020523	11	57296492	57332146
Mfap3	ENSMUSG00000020522	11	57332166	57347317
Galnt10	ENSMUSG00000020520	11	57458944	57601016
Sap30l	ENSMUSG00000020519	11	57615139	57623719
Hand1	ENSMUSG00000037335	11	57642207	57646320
Gm11003	ENSMUSG00000078855	11	57651266	57651591
Larp1	ENSMUSG00000037331	11	57822566	57875533
Cnot8	ENSMUSG00000020515	11	57917655	57932096
Gemin5	ENSMUSG00000037275	11	57933504	57982041
Mrpl22	ENSMUSG00000020514	11	57985163	57993067
Igtp	ENSMUSG00000078853	11	58013058	58021093
Irgm2	ENSMUSG00000069874	11	58028530	58036282
Gm12242	ENSMUSG00000082476	11	57262609	57263346
Gm12243	ENSMUSG00000086028	11	57386014	57388097
4933424L21Rik	ENSMUSG00000085719	11	57437200	57462996
4933426K07Rik	ENSMUSG00000086933	11	57468917	57471328
2010001A14Rik	ENSMUSG00000087165	11	57609001	57614919
Gm12244	ENSMUSG00000084223	11	57694398	57694688
Gm12245	ENSMUSG00000083657	11	57762231	57762587
Gm12249	ENSMUSG00000086666	11	57783746	57786636
Gm12248	ENSMUSG00000086962	11	57877330	57886439
Gm12247	ENSMUSG00000081223	11	57910606	57911275
Gm12246	ENSMUSG00000087629	11	57939570	57942014
Gm12250	ENSMUSG00000082292	11	57997345	58003700
7SK	ENSMUSG00000089280	11	57782844	57783114
U6	ENSMUSG00000077155	11	57554802	57554904
n-R5s69	ENSMUSG00000065806	11	57577929	57578047
4930438A08Rik	ENSMUSG00000069873	11	58088301	58107791
Zfp692	ENSMUSG00000037243	11	58120571	58128129
Zfp672	ENSMUSG00000049755	11	58128616	58136848
Gm9900	ENSMUSG00000053218	11	58141223	58143841
Sh3bp5l	ENSMUSG00000013646	11	58144226	58161230
1700047K16Rik	ENSMUSG00000087347	11	58136490	58137941
snoU13	ENSMUSG00000088382	11	58185676	58185773
2210415F13Rik	ENSMUSG00000013643	11	58192545	58204230
Gm12251	ENSMUSG00000084384	11	58206271	58207065
Gm12252	ENSMUSG00000082181	11	58209799	58210017
1810065E05Rik	ENSMUSG00000013653	11	58234613	58239526
Gm12253	ENSMUSG00000058287	11	58246061	58255124
4930504O13Rik	ENSMUSG00000052642	11	58259651	58266425
Olfr30	ENSMUSG00000043314	11	58268417	58269482
Olfr332	ENSMUSG00000050813	11	58303221	58304255
Olfr331	ENSMUSG00000058807	11	58315007	58323593
Olfr333-ps1	ENSMUSG00000081287	11	58290854	58291659
Gm12254	ENSMUSG00000085342	11	58322293	58322763
Olfr330	ENSMUSG00000050818	11	58342431	58348327
Gm12255	ENSMUSG00000083501	11	58346396	58346605
Olfr329-ps	ENSMUSG00000064252	11	58355905	58358440
Olfr328	ENSMUSG00000057654	11	58364807	58368144
Olfr224	ENSMUSG00000059279	11	58379836	58382757
Olfr325	ENSMUSG00000060765	11	58394315	58395379
Olfr324	ENSMUSG00000056564	11	58410847	58411968
2210407C18Rik	ENSMUSG00000037145	11	58421706	58429577
Olfr323	ENSMUSG00000043880	11	58438575	58439546
Gm9144	ENSMUSG00000073233	12	7866633	7868011
Gm17295	ENSMUSG00000090299	12	7120432	7121931
Apob	ENSMUSG00000020609	12	7984454	8023641
AC124134.1	ENSMUSG00000093053	12	7748359	7748428
Id2	ENSMUSG00000020644	12	25778666	25780957
Rnf144a	ENSMUSG00000020642	12	26991662	27100121
Rsad2	ENSMUSG00000020641	12	27127618	27141317
Cmpk2	ENSMUSG00000020638	12	27154069	27164700
5S_rRNA	ENSMUSG00000089441	12	26372666	26372771
Gm9866	ENSMUSG00000052076	12	27825667	27845311
Sox11	ENSMUSG00000063632	12	28025562	28027574
Dcdc2c	ENSMUSG00000020633	12	29122660	29232182
Allc	ENSMUSG00000020636	12	29238620	29267388
Colec11	ENSMUSG00000036655	12	29279038	29308155
Rps7	ENSMUSG00000061477	12	29315712	29320818
Rnaseh1	ENSMUSG00000020630	12	29334467	29344456
Adi1	ENSMUSG00000020629	12	29360096	29367040
Ttc15	ENSMUSG00000020628	12	29375494	29435331
Tssc1	ENSMUSG00000036613	12	29436693	29552356
5S_rRNA	ENSMUSG00000088937	12	28745256	28745393
SNORA17	ENSMUSG00000077344	12	28316668	28316792
SNORA17	ENSMUSG00000077792	12	29035128	29035259
Myt1l	ENSMUSG00000061911	12	30213249	30608074
5S_rRNA	ENSMUSG00000089583	12	29720045	29720159
Gm15691	ENSMUSG00000085472	12	30744522	30746978
Pxdn	ENSMUSG00000020674	12	30622901	30702523
Tpo	ENSMUSG00000020673	12	30739524	30817489
Sntg2	ENSMUSG00000020672	12	30859347	31058240
Tmem18	ENSMUSG00000043061	12	31269308	31276078
Fam150b	ENSMUSG00000054204	12	31569187	31578719
Acp1	ENSMUSG00000044573	12	31578191	31596477
Sh3yl1	ENSMUSG00000020669	12	31596533	31645027
Fam110c	ENSMUSG00000036136	12	31758833	31764802
6030469F06Rik	ENSMUSG00000073142	12	31856066	31870766
AC160932.1	ENSMUSG00000093150	12	31519797	31519867
SNORA17	ENSMUSG00000077292	12	31741940	31742072
AC159204.1	ENSMUSG00000092653	12	31242779	31242999
AC154485.1	ENSMUSG00000088872	12	31142833	31142936
RP23-113F14.3	ENSMUSG00000093423	12	74141002	74143802
Daam1	ENSMUSG00000034574	12	72932065	73093354
Gpr135	ENSMUSG00000043398	12	73170605	73171978
2810055F11Rik	ENSMUSG00000019718	12	73174415	73186426
Jkamp	ENSMUSG00000005078	12	73186576	73202448
4930403N07Rik	ENSMUSG00000021086	12	73202279	73286016
Rtn1	ENSMUSG00000021087	12	73312739	73510041
Lrrc9	ENSMUSG00000021090	12	73542853	73615321
1810048J11Rik	ENSMUSG00000034501	12	73637344	73681200
Dhrs7	ENSMUSG00000021094	12	73751343	73765815
Ppm1a	ENSMUSG00000021096	12	73862198	73895927
4930447C04Rik	ENSMUSG00000021098	12	73982096	74041820
Six6	ENSMUSG00000021099	12	74040711	74047081
Six1	ENSMUSG00000051367	12	74137916	74154874
Six4	ENSMUSG00000034460	12	74200596	74215024
Mnat1	ENSMUSG00000021103	12	74224704	74374975
Trmt5	ENSMUSG00000034442	12	74380999	74387698
Slc38a6	ENSMUSG00000044712	12	74387766	74455036
D830013O20Rik	ENSMUSG00000056359	12	74465062	74510544
Tmem30b	ENSMUSG00000034435	12	74644101	74647382
Prkch	ENSMUSG00000021108	12	74685783	74879172
SNORA17	ENSMUSG00000077785	12	74246761	74246892
CR974486.1	ENSMUSG00000077094	12	73231197	73231305
Gm15283	ENSMUSG00000087700	12	75027468	75050772
Hif1a	ENSMUSG00000021109	12	75002362	75048517
Gm5068	ENSMUSG00000066457	12	75062129	75062434
Snapc1	ENSMUSG00000021113	12	75065517	75085807
Syt16	ENSMUSG00000044912	12	75098748	75368903
Gm7862	ENSMUSG00000046580	12	77253323	77253614
Mthfd1	ENSMUSG00000021048	12	77356219	77420807
Esr2	ENSMUSG00000021055	12	77221406	77278246
Rhoj	ENSMUSG00000046768	12	76409309	76502443
4930426I24Rik	ENSMUSG00000091710	12	77503744	77504641
Akap5	ENSMUSG00000021057	12	77425878	77435140
Zbtb25	ENSMUSG00000056459	12	77448769	77470589
Zbtb1	ENSMUSG00000033454	12	77471253	77497937
Hspa2	ENSMUSG00000059970	12	77505163	77507921
Ppp1r36	ENSMUSG00000052221	12	77518586	77540460
Churc1	ENSMUSG00000090258	12	77866525	77884167
Fntb	ENSMUSG00000033373	12	77866576	78022399
Kcnh5	ENSMUSG00000034402	12	75998204	76278319
Max	ENSMUSG00000059436	12	78038256	78063235
Tex21	ENSMUSG00000021056	12	77299679	77347733
Gpx2	ENSMUSG00000042808	12	77893322	77896541
Rab15	ENSMUSG00000021062	12	77898947	77923895
Gphb5	ENSMUSG00000048982	12	76512707	76517768
Ppp2r5e	ENSMUSG00000021051	12	76551870	76697232
Rplp2-ps1	ENSMUSG00000091018	12	76731924	76732365
Wdr89	ENSMUSG00000045690	12	76732510	76770489
Sgpp1	ENSMUSG00000021054	12	76815235	76836716
Syne2	ENSMUSG00000063450	12	76919121	77211913
Gm10451	ENSMUSG00000073000	12	77545547	77552323
[truncated: 1,072 more rows]

## Sheet: wk14IgG1to3-PT
Gene Name	Ensembl Gene ID	Chromosome	Start	End
Khdrbs2	ENSMUSG00000026058	1	32229651	32714583
Gm9839	ENSMUSG00000049830	1	32576408	32577844
Gm5415	ENSMUSG00000091318	1	32600391	32604138
Gm10307	ENSMUSG00000070960	1	31672836	31673507
Gm7910	ENSMUSG00000082159	1	31792901	31793737
U6	ENSMUSG00000065223	1	33350521	33350620
U7	ENSMUSG00000089489	1	32625204	32625266
U6	ENSMUSG00000064688	1	32269978	32270084
7SK	ENSMUSG00000089395	1	32783484	32783775
U6	ENSMUSG00000088620	1	31713477	31713583
U6	ENSMUSG00000088750	1	33248838	33248947
U6	ENSMUSG00000065260	1	33479578	33479683
Prim2	ENSMUSG00000026134	1	33510656	33726631
1700001G17Rik	ENSMUSG00000044744	1	33726688	33727557
Rab23	ENSMUSG00000004768	1	33776727	33799409
Bag2	ENSMUSG00000042215	1	33802329	33814639
Zfp451	ENSMUSG00000042197	1	33817317	33871440
Gm15455	ENSMUSG00000081402	1	33892744	33895759
Bend6	ENSMUSG00000042182	1	33908897	33964661
Gm11158	ENSMUSG00000079617	1	34428991	34460294
Ccdc115	ENSMUSG00000042111	1	34493516	34496517
Imp4	ENSMUSG00000026127	1	34496696	34502581
Ptpn18	ENSMUSG00000026126	1	34516591	34532499
Prss39	ENSMUSG00000026125	1	34555275	34559907
Cfc1	ENSMUSG00000026124	1	34592493	34601156
Prss40	ENSMUSG00000037529	1	34600820	34617788
1700101I19Rik	ENSMUSG00000045815	1	34636069	34636458
Fam123c	ENSMUSG00000045174	1	34636538	34647783
Arhgef4	ENSMUSG00000037509	1	34778769	34870154
Fam168b	ENSMUSG00000037503	1	34870064	34899910
Plekhb2	ENSMUSG00000026123	1	34906804	34936425
Hs6st1	ENSMUSG00000045216	1	36125245	36163291
Uggt1	ENSMUSG00000037470	1	36198375	36301150
Neurl3	ENSMUSG00000047180	1	36321447	36330270
Arid5a	ENSMUSG00000037447	1	36364578	36380874
4632411B12Rik	ENSMUSG00000010453	1	36392575	36426026
C230030N03Rik	ENSMUSG00000089955	1	34735033	34781146
C230030N03Rik	ENSMUSG00000046858	1	34779929	34780877
SNORA17	ENSMUSG00000077231	1	35235801	35235929
Mir5103	ENSMUSG00000092852	1	34489966	34490044
U6	ENSMUSG00000064601	1	35818447	35818551
Fer1l5	ENSMUSG00000037432	1	36473733	36478955
Lman2l	ENSMUSG00000001143	1	36478910	36502116
Cnnm4	ENSMUSG00000037408	1	36528442	36565621
Cnnm3	ENSMUSG00000001138	1	36568712	36585082
Ankrd23	ENSMUSG00000067653	1	36587379	36592584
Ankrd39	ENSMUSG00000079610	1	36595018	36604046
Sema4c	ENSMUSG00000026121	1	36605487	36615194
Fam178b	ENSMUSG00000046337	1	36619539	36740028
Cox5b	ENSMUSG00000061518	1	36748332	36750230
Actr1b	ENSMUSG00000037351	1	36756047	36771267
D430040D24Rik	ENSMUSG00000087589	1	36615204	36622458
Gm6428	ENSMUSG00000089906	1	36658647	36658991
AC084389.1	ENSMUSG00000077939	1	36720810	36720884
Zap70	ENSMUSG00000026117	1	36818695	36839663
Tmem131	ENSMUSG00000026116	1	36849036	36996372
Rpl12-ps1	ENSMUSG00000080054	1	37014738	37015362
Vwa3b	ENSMUSG00000050122	1	37083441	37133841
Vwa3b	ENSMUSG00000026115	1	37210689	37244450
Cnga3	ENSMUSG00000026114	1	37275181	37320229
Inpp4a	ENSMUSG00000026113	1	37356710	37467581
6330578E17Rik	ENSMUSG00000026112	1	37473929	37486948
Unc50	ENSMUSG00000026111	1	37487015	37495969
Mgat4a	ENSMUSG00000026110	1	37496185	37597861
2010300C02Rik	ENSMUSG00000026090	1	37668522	37776930
Tsga10	ENSMUSG00000060771	1	37811417	37922143
Lipt1	ENSMUSG00000037216	1	37928583	37934232
Mitd1	ENSMUSG00000026088	1	37931646	37947256
Mrpl30	ENSMUSG00000026087	1	37947322	37955380
4930439A04Rik	ENSMUSG00000086064	1	37386512	37391017
4930594C11Rik	ENSMUSG00000087233	1	37544038	37545827
4930556I23Rik	ENSMUSG00000089767	1	37671104	37672217
Gm17715	ENSMUSG00000092106	1	37922144	37928233
n-R5s210	ENSMUSG00000070201	1	37062284	37062402
Lyg2	ENSMUSG00000061584	1	37962766	37973338
Epha4	ENSMUSG00000026235	1	77363760	77511663
Pax3	ENSMUSG00000004872	1	78097842	78193709
Sgpp2	ENSMUSG00000032908	1	78306921	78416861
Farsb	ENSMUSG00000026245	1	78414533	78485434
BC035947	ENSMUSG00000090486	1	78494381	78508538
Mogat1	ENSMUSG00000012187	1	78507566	78534748
Acsl3	ENSMUSG00000032883	1	78654400	78703562
Utp14b	ENSMUSG00000079470	1	78654613	78664163
Kcne4	ENSMUSG00000047330	1	78813502	78816599
Gm5830	ENSMUSG00000072978	1	78964212	78964654
U1	ENSMUSG00000065215	1	77894858	77895021
Gli2	ENSMUSG00000048402	1	120730709	120950196
Inhbb	ENSMUSG00000037035	1	121312042	121318825
Ralb	ENSMUSG00000004451	1	121366882	121401371
Epb4.1l5	ENSMUSG00000026383	1	121441610	121545577
Ptpn4	ENSMUSG00000026384	1	121554621	121734190
Tmem177	ENSMUSG00000036975	1	121804467	121809785
Gm101	ENSMUSG00000036962	1	121819918	121893811
Sctr	ENSMUSG00000026387	1	121903557	121960105
Tmem37	ENSMUSG00000050777	1	121963954	121970651
Dbi	ENSMUSG00000026385	1	122009857	122017655
3110009E18Rik	ENSMUSG00000026388	1	122017764	122084766
Steap3	ENSMUSG00000026389	1	122087334	122169282
C1ql2	ENSMUSG00000036907	1	122237159	122239748
Marco	ENSMUSG00000026390	1	122371115	122401661
En1	ENSMUSG00000058665	1	122498995	122505873
Tmem185b	ENSMUSG00000037015	1	121423002	121424801
Gm3851	ENSMUSG00000091876	1	121684346	121684663
Gm8338	ENSMUSG00000090277	1	121714340	121714702
Gm17973	ENSMUSG00000092245	1	121883372	121883891
U6	ENSMUSG00000084505	1	121426788	121426891
B230209K01Rik	ENSMUSG00000086664	1	122983982	123017533
Insig2	ENSMUSG00000003721	1	123200930	123229166
Ccdc93	ENSMUSG00000026339	1	123327626	123403037
Htr5b	ENSMUSG00000050534	1	123406419	123425042
Ddx18	ENSMUSG00000001674	1	123450412	123464566
Gm15392	ENSMUSG00000085857	1	123385873	123389780
Gm15393	ENSMUSG00000083582	1	123404162	123404380
Gm8217	ENSMUSG00000081130	1	123417160	123417624
Cdc73	ENSMUSG00000026361	1	145445927	145550023
Cdc73	ENSMUSG00000078284	1	145452292	145453738
B3galt2	ENSMUSG00000033849	1	145487794	145497536
Glrx2	ENSMUSG00000018196	1	145586159	145596806
Trove2	ENSMUSG00000018199	1	145597920	145624198
Uchl5	ENSMUSG00000018189	1	145624408	145654596
Rgs2	ENSMUSG00000026360	1	145846468	145851291
Rgs13	ENSMUSG00000051079	1	145985797	146024502
Rgs1	ENSMUSG00000026358	1	146091102	146096372
Rgs21	ENSMUSG00000091758	1	146366820	146388442
Rgs18	ENSMUSG00000026357	1	146599813	146622565
Gm6397	ENSMUSG00000089640	1	145530360	145531428
snoU109	ENSMUSG00000088323	1	145626058	145626192
U6	ENSMUSG00000065787	1	146807864	146807969
AC102320.1	ENSMUSG00000092688	1	146826614	146826715
U4	ENSMUSG00000088096	1	146456134	146456240
Gm15443	ENSMUSG00000082588	1	150872358	150873177
U6	ENSMUSG00000088167	1	151554507	151554612
SNORA17	ENSMUSG00000088582	1	150174110	150174238
n-R5s218	ENSMUSG00000084532	1	151581880	151581988
Pla2g4a	ENSMUSG00000056220	1	151676748	151808420
Ptgs2	ENSMUSG00000032487	1	151947254	151955140
7530420F21Rik	ENSMUSG00000084952	1	151922003	151947004
n-R5s219	ENSMUSG00000077516	1	151688660	151688791
BC026585	ENSMUSG00000033488	1	159388711	159419191
Sec16b	ENSMUSG00000026589	1	159436859	159498556
Fam5b	ENSMUSG00000004031	1	160175402	160286391
Astn1	ENSMUSG00000026587	1	160292471	160621917
Pappa2	ENSMUSG00000073530	1	160641862	160887870
1600012P17Rik	ENSMUSG00000047661	1	160888258	160910621
Gm4953	ENSMUSG00000061992	1	161098288	161098773
Rfwd2	ENSMUSG00000040782	1	161162457	161277711
Gm15486	ENSMUSG00000087093	1	159428006	159441852
Mir488	ENSMUSG00000070103	1	160435756	160435864
AC084287.1	ENSMUSG00000080410	1	161261927	161262009
Scarna3a	ENSMUSG00000089536	1	161270414	161270553
Gm10530	ENSMUSG00000073528	1	161544880	161615006
Tnr	ENSMUSG00000015829	1	161667641	161855053
4930523C07Rik	ENSMUSG00000090394	1	161974515	162008559
4930523C07Rik	ENSMUSG00000050883	1	161974715	162001640
4930562F07Rik	ENSMUSG00000026729	1	162004866	162008116
Tnn	ENSMUSG00000026725	1	162015165	162083711
Mrps14	ENSMUSG00000058267	1	162125346	162132301
Cacybp	ENSMUSG00000014226	1	162133056	162142908
Rabgap1l	ENSMUSG00000026721	1	162149305	162723069
Gm10529	ENSMUSG00000073527	1	162005293	162005672
Mir1927	ENSMUSG00000089204	1	162225995	162226103
SNORA17	ENSMUSG00000088145	1	161913627	161913736
SNORA17	ENSMUSG00000077759	1	162575704	162575835
Gm6177	ENSMUSG00000057499	1	162823251	162823715
Rc3h1	ENSMUSG00000040423	1	162836549	162905109
Serpinc1	ENSMUSG00000026715	1	162908737	162933141
Zbtb37	ENSMUSG00000043467	1	162938925	162964980
Dars2	ENSMUSG00000026709	1	162970732	163000789
Cenpl	ENSMUSG00000026708	1	163000898	163016855
Klhl20	ENSMUSG00000026705	1	163018506	163061642
Ankrd45	ENSMUSG00000044835	1	163072822	163099237
Gas5	ENSMUSG00000053332	1	162964553	162968670
4930469G21Rik	ENSMUSG00000049160	1	163084689	163089445
SNORD44	ENSMUSG00000084667	1	162966813	162966872
SNORD24	ENSMUSG00000064816	1	162966188	162966270
SNORD77	ENSMUSG00000065735	1	162967732	162967812
SNORD78	ENSMUSG00000077220	1	162967115	162967180
SNORD74	ENSMUSG00000064440	1	162965525	162965604
SNORD75	ENSMUSG00000080463	1	162965981	162966042
SNORD79	ENSMUSG00000065160	1	162967487	162967570
SNORD81	ENSMUSG00000065228	1	162968439	162968514
SNORA26	ENSMUSG00000077648	1	162806333	162806453
Snord47	ENSMUSG00000064968	1	162968213	162968289
Prdx6	ENSMUSG00000026701	1	163170243	163181350
Tnfsf4	ENSMUSG00000026700	1	163325581	163348337
Tnfsf18	ENSMUSG00000066755	1	163424786	163435421
5S_rRNA	ENSMUSG00000089353	1	163482680	163482797
Fasl	ENSMUSG00000000817	1	163710820	163718626
AI848100	ENSMUSG00000040297	1	163746243	163806792
Gm15429	ENSMUSG00000040323	1	163656373	163657620
4930558K02Rik	ENSMUSG00000086277	1	163872217	163909767
Pigc	ENSMUSG00000026698	1	163899317	163957237
Dnm3	ENSMUSG00000040265	1	163912584	164408165
2810442N19Rik	ENSMUSG00000090260	1	163935100	163946625
Dnm3os	ENSMUSG00000078190	1	164147754	164155681
Gm16101	ENSMUSG00000089933	1	164246223	164246652
Mir214	ENSMUSG00000065516	1	164153499	164153608
AC157798.1	ENSMUSG00000093181	1	164080498	164080693
Mir199a-2	ENSMUSG00000070126	1	164147945	164148054
Gm10176	ENSMUSG00000066752	1	164407811	164410074
Mettl13	ENSMUSG00000026694	1	164462258	164478682
Vamp4	ENSMUSG00000026696	1	164500646	164529215
Gm5705	ENSMUSG00000091743	1	164558488	164559114
Myoc	ENSMUSG00000026697	1	164569281	164579824
7420461P10Rik	ENSMUSG00000091060	1	164577334	164588304
Prrc2c	ENSMUSG00000040225	1	164603533	164670681
Fmo4	ENSMUSG00000026692	1	164724014	164744103
Fmo1	ENSMUSG00000040181	1	164759692	164796679
Fmo2	ENSMUSG00000040170	1	164804448	164828857
Fmo3	ENSMUSG00000026691	1	164883933	164914659
4921528O07Rik	ENSMUSG00000071890	1	164954433	165015801
SNORA17	ENSMUSG00000077608	1	164984949	164985082
SNORA40	ENSMUSG00000089174	1	165048358	165048479
Prrx1	ENSMUSG00000026586	1	165175247	165243841
Gorab	ENSMUSG00000040124	1	165315040	165333772
Gm17698	ENSMUSG00000090335	1	165231921	165233751
Gm20471	ENSMUSG00000092188	1	165210487	165217176
U6atac	ENSMUSG00000088951	1	165332414	165332521
Mndal	ENSMUSG00000090272	1	175787352	175872622
Mnda	ENSMUSG00000026536	1	175826486	175843053
Ifi203	ENSMUSG00000039997	1	175850538	175872803
Ifi202b	ENSMUSG00000026535	1	175892700	175912975
Ifi205	ENSMUSG00000054203	1	175942129	175961886
Olfr433	ENSMUSG00000045381	1	175972064	175973067
Olfr432	ENSMUSG00000047048	1	175980506	175981444
Olfr430	ENSMUSG00000050134	1	175999431	176000384
Olfr429	ENSMUSG00000049528	1	176019169	176020111
Olfr427	ENSMUSG00000059371	1	176029591	176030538
Olfr231	ENSMUSG00000046486	1	176047222	176048145
Olfr424	ENSMUSG00000051528	1	176066877	176067824
Olfr421	ENSMUSG00000091950	1	176081612	176082661
Olfr420	ENSMUSG00000055033	1	176088853	176089898
Spna1	ENSMUSG00000026532	1	176102907	176178581
Olfr419	ENSMUSG00000050788	1	176180020	176181107
1810030J14Rik	ENSMUSG00000026531	1	176260649	176263004
Olfr417	ENSMUSG00000066672	1	176299050	176299979
Olfr248	ENSMUSG00000059503	1	176321177	176322186
Olfr414	ENSMUSG00000051509	1	176360561	176361515
Olfr220	ENSMUSG00000066671	1	176378756	176379733
Fmn2	ENSMUSG00000028354	1	176431956	176752848
Grem2	ENSMUSG00000050069	1	176763916	176851950
Rgs7	ENSMUSG00000026527	1	176989867	177421261
Fh1	ENSMUSG00000026526	1	177530505	177555766
Kmo	ENSMUSG00000039783	1	177550512	177592247
Opn3	ENSMUSG00000026525	1	177592552	177622907
Chml	ENSMUSG00000078185	1	177616619	177618484
Wdr64	ENSMUSG00000026523	1	177628724	177745865
Exo1	ENSMUSG00000039748	1	177810909	177841527
U6	ENSMUSG00000065666	1	177834676	177834782
U2	ENSMUSG00000077794	1	177730645	177730820
Kif26b	ENSMUSG00000026494	1	180459256	180862986
Smyd3	ENSMUSG00000055067	1	180882091	181448172
Gm5561	ENSMUSG00000075392	1	181450388	181451039
Tfb2m	ENSMUSG00000026492	1	181458186	181476398
Cnst	ENSMUSG00000038949	1	181476501	181557609
Sccpdh	ENSMUSG00000038936	1	181598341	181617320
Gm1305	ENSMUSG00000087236	1	181625428	181675316
Ahctf1	ENSMUSG00000026491	1	181675025	181733811
Gm10518	ENSMUSG00000073486	1	181733507	181734807
Cdc42bpa	ENSMUSG00000026490	1	181890603	182095734
Adck3	ENSMUSG00000026489	1	182095369	182129733
Psen2	ENSMUSG00000010609	1	182157135	182193569
Gm5069	ENSMUSG00000055676	1	182257102	182260681
Itpkb	ENSMUSG00000038855	1	182260607	182354933
6330403A02Rik	ENSMUSG00000053963	1	182362518	182413598
Parp1	ENSMUSG00000026496	1	182499086	182531384
Lin9	ENSMUSG00000058729	1	182571498	182620816
Mixl1	ENSMUSG00000026497	1	182623174	182627165
Acbd3	ENSMUSG00000026499	1	182656174	182684334
H3f3a	ENSMUSG00000060743	1	182730963	182744074
BC031781	ENSMUSG00000038806	1	182781282	182798228
Lefty2	ENSMUSG00000066652	1	182823239	182829234
Pycr2	ENSMUSG00000026520	1	182834405	182838218
Gm17275	ENSMUSG00000090986	1	182732699	182739614
Gm16564	ENSMUSG00000089713	1	180828713	180847745
Gm15480	ENSMUSG00000082395	1	181468548	181469066
Gm16067	ENSMUSG00000073485	1	182743907	182746990
U6	ENSMUSG00000084558	1	182762900	182763007
AC167020.1	ENSMUSG00000092967	1	182663926	182664013
Lefty1	ENSMUSG00000038793	1	182865153	182868531
Tmem63a	ENSMUSG00000026519	1	182872475	182905243
2210411M09Rik	ENSMUSG00000085563	1	182882195	182888280
Ephx1	ENSMUSG00000038776	1	182906286	182951035
9130409I23Rik	ENSMUSG00000038768	1	182981368	182990798
Nvl	ENSMUSG00000026516	1	183023554	183074288
Cnih4	ENSMUSG00000062169	1	183081062	183099125
Wdr26	ENSMUSG00000038733	1	183103359	183142109
Kcnk2	ENSMUSG00000037624	1	191031816	191167711
Cenpf	ENSMUSG00000026605	1	191464478	191511965
Ptpn14	ENSMUSG00000026604	1	191552147	191700574
Smyd2	ENSMUSG00000026603	1	191704371	191746242
Prox1	ENSMUSG00000010175	1	191941917	191994559
Rps6kc1	ENSMUSG00000089872	1	192524081	192735649
Angel2	ENSMUSG00000026634	1	192748991	192770841
Vash2	ENSMUSG00000037568	1	192771527	192803175
Mfsd7b	ENSMUSG00000066595	1	192829711	192850069
1700022P22Rik	ENSMUSG00000057072	1	192860701	192866821
Tatdn3	ENSMUSG00000026632	1	192869705	192886811
Gm17653	ENSMUSG00000090445	1	191657020	191660499
Gm17566	ENSMUSG00000079045	1	191994175	192041155
mmu-mir-1194	ENSMUSG00000080505	1	191217229	191217349
AC124613.1	ENSMUSG00000093064	1	192306751	192307036
Nsl1	ENSMUSG00000062510	1	192886891	192908437
Batf3	ENSMUSG00000026630	1	192922293	192932822
Fam71a	ENSMUSG00000091017	1	192986463	192988696
Atf3	ENSMUSG00000026628	1	192994175	193007219
Nenf	ENSMUSG00000037499	1	193130668	193142073
Tmem206	ENSMUSG00000026627	1	193149791	193174793
Ppp2r5a	ENSMUSG00000026626	1	193175860	193220920
Dtl	ENSMUSG00000037474	1	193361244	193399413
Ints7	ENSMUSG00000037461	1	193399642	193446551
Lpgat1	ENSMUSG00000026623	1	193541713	193608134
Nek2	ENSMUSG00000026622	1	193645323	193656929
D730003I15Rik	ENSMUSG00000073478	1	193048353	193049565
U6	ENSMUSG00000064845	1	193596600	193596713
U6	ENSMUSG00000065821	1	193586079	193586182
7SK	ENSMUSG00000088461	1	193020785	193020892
1700034H15Rik	ENSMUSG00000055833	1	193714112	193731406
Slc30a1	ENSMUSG00000037434	1	193730646	193737126
Rd3	ENSMUSG00000049353	1	193801270	193810273
Traf5	ENSMUSG00000026637	1	193821311	193916440
Mir3473c	ENSMUSG00000093003	1	193822435	193822515
Rcor3	ENSMUSG00000037395	1	193922652	193961892
Gm16621	ENSMUSG00000085764	1	193916253	193923511
Gm10516	ENSMUSG00000073476	1	193960780	193974895
Kcnh1	ENSMUSG00000058248	1	194014666	194334041
Hhat	ENSMUSG00000037375	1	194336710	194597413
U5	ENSMUSG00000064881	1	194571765	194571880
A730013G03Rik	ENSMUSG00000047384	1	194659363	194660913
Sertad4	ENSMUSG00000016262	1	194670625	194681946
Gm15867	ENSMUSG00000089812	1	194681122	194682660
Syt14	ENSMUSG00000016200	1	194723404	194861911
7SK	ENSMUSG00000089158	1	194824480	194824768
Diexf	ENSMUSG00000016181	1	194930597	194956445
Irf6	ENSMUSG00000026638	1	194979306	194998236
A130010J15Rik	ENSMUSG00000079144	1	194994243	195002497
Traf3ip3	ENSMUSG00000037318	1	195001700	195027897
Gm15872	ENSMUSG00000090080	1	195013569	195018205
4930570N18Rik	ENSMUSG00000089683	1	195029233	195052402
1600010F14Rik	ENSMUSG00000089688	1	195033944	195080668
Hsd11b1	ENSMUSG00000016194	1	195047824	195090248
G0s2	ENSMUSG00000009633	1	195098355	195099382
Lamb3	ENSMUSG00000026639	1	195128151	195170072
Camk1g	ENSMUSG00000016179	1	195172540	195196491
Plxna2	ENSMUSG00000026640	1	196446023	196643063
4631405K08Rik	ENSMUSG00000091593	1	195333432	195335997
Mir205	ENSMUSG00000065533	1	195333657	195333724
Cdc123	ENSMUSG00000039128	2	5715340	5766210
Nudt5	ENSMUSG00000025817	2	5766065	5792941
Gm13199	ENSMUSG00000056718	2	5783126	5783980
Sec61a2	ENSMUSG00000025816	2	5792033	5816478
Dhtkd1	ENSMUSG00000025815	2	5817161	5863838
Upf2	ENSMUSG00000043241	2	5872515	5977749
5430407P10Rik	ENSMUSG00000045319	2	6021071	6051257
Echdc3	ENSMUSG00000039063	2	6109511	6134079
Usp6nl	ENSMUSG00000039046	2	6243713	6367436
Celf2	ENSMUSG00000002107	2	6460751	7002348
Gm10855	ENSMUSG00000075538	2	6853587	6856127
Gm10115	ENSMUSG00000062319	2	6871499	6872726
Gm13267	ENSMUSG00000085818	2	5816556	5821177
Gm13384	ENSMUSG00000082332	2	6053254	6055002
A230108P19Rik	ENSMUSG00000087125	2	6114297	6242657
Gm13383	ENSMUSG00000087485	2	6176992	6178312
Gm13388	ENSMUSG00000085716	2	6352832	6357079
Gm13391	ENSMUSG00000086109	2	6393046	6399665
Gm13389	ENSMUSG00000087079	2	6805316	6807970
Gm13390	ENSMUSG00000087656	2	7317485	7317627
Gm13210	ENSMUSG00000083252	2	7552703	7552975
Gm13211	ENSMUSG00000085070	2	7637778	7703035
Gm17437	ENSMUSG00000091136	2	6998311	7002359
U6	ENSMUSG00000077396	2	7271724	7271820
7SK	ENSMUSG00000065824	2	6997140	6997460
Cubn	ENSMUSG00000026726	2	13197965	13413551
Trdmt1	ENSMUSG00000026723	2	13430641	13466291
Gm9875	ENSMUSG00000052389	2	13479475	13481951
Vim	ENSMUSG00000026728	2	13495554	13504453
St8sia6	ENSMUSG00000003418	2	13572647	13715435
Ptpla	ENSMUSG00000063275	2	13897190	13977762
Stam	ENSMUSG00000026718	2	13995727	14069965
Fam23a	ENSMUSG00000061531	2	14096151	14143598
Mrc1	ENSMUSG00000026712	2	14151041	14253684
Slc39a12	ENSMUSG00000036949	2	14309943	14416602
Cacnb2	ENSMUSG00000057914	2	14525933	14909535
Nsun6	ENSMUSG00000026707	2	14916758	14976511
Arl5b	ENSMUSG00000017418	2	14971022	15004083
4921530L18Rik	ENSMUSG00000086657	2	13991959	13995561
Gm13320	ENSMUSG00000083545	2	14111236	14111565
Gm13266	ENSMUSG00000084901	2	14434218	14464432
Gm10849	ENSMUSG00000075525	2	14525617	14526238
Gm13268	ENSMUSG00000070271	2	14548507	14548950
Gm13312	ENSMUSG00000083633	2	14593882	14594347
Gm13314	ENSMUSG00000081008	2	14613008	14613326
Gm13311	ENSMUSG00000082542	2	14614499	14614878
Gm13315	ENSMUSG00000083305	2	14642760	14643748
Gm13269	ENSMUSG00000087086	2	14662001	14688649
Gm13316	ENSMUSG00000085281	2	14733468	14734165
Gm13313	ENSMUSG00000083860	2	15049234	15050305
Gm13367	ENSMUSG00000080930	2	15264248	15265049
Gm13366	ENSMUSG00000083631	2	15307242	15308217
Mir511	ENSMUSG00000077897	2	14182630	14182708
Gm13455	ENSMUSG00000081577	2	40142682	40143198
Gm13456	ENSMUSG00000082536	2	40411272	40412636
Gm13462	ENSMUSG00000082930	2	40813911	40814871
Gm13460	ENSMUSG00000083260	2	40854377	40854729
Gm13461	ENSMUSG00000081999	2	41842685	41844369
Gm13463	ENSMUSG00000081085	2	41980141	41980373
Lrp1b	ENSMUSG00000049252	2	40450768	42509118
SNORA17	ENSMUSG00000088512	2	40154037	40154162
SNORA17	ENSMUSG00000077351	2	42664555	42664686
Ppp1r1c	ENSMUSG00000034683	2	79547937	79658653
Neurod1	ENSMUSG00000034701	2	79292678	79296908
Cerkl	ENSMUSG00000075256	2	79170700	79296942
Gm17325	ENSMUSG00000090313	2	79294142	79301264
Dusp19	ENSMUSG00000027001	2	80457202	80472518
Frzb	ENSMUSG00000027004	2	80252127	80287782
Nup35	ENSMUSG00000026999	2	80457393	80499063
Ssfa2	ENSMUSG00000027007	2	79475509	79513123
Ube2e3	ENSMUSG00000027011	2	78708281	78761450
Itga4	ENSMUSG00000027009	2	79095583	79173280
Pde1a	ENSMUSG00000059173	2	79674610	79969632
Nckap1	ENSMUSG00000027002	2	80340669	80421537
Gm14467	ENSMUSG00000082731	2	78560594	78560866
Gm17014	ENSMUSG00000084101	2	78685443	78685610
Gm14466	ENSMUSG00000083950	2	78862978	78863428
Gm14469	ENSMUSG00000080984	2	78878690	78878891
Gm14465	ENSMUSG00000083691	2	79001186	79001752
Gm13673	ENSMUSG00000081284	2	79200022	79200552
Gm13674	ENSMUSG00000083519	2	79972087	79972909
Gm13752	ENSMUSG00000085921	2	80235054	80240682
Gm13687	ENSMUSG00000082494	2	80339387	80339668
Gm13689	ENSMUSG00000081487	2	80389869	80390553
Gm13688	ENSMUSG00000083284	2	80442890	80443497
Gm13690	ENSMUSG00000086436	2	80469438	80469725
Prdx6b	ENSMUSG00000050114	2	80132629	80135513
Dnajc10	ENSMUSG00000027006	2	80155623	80194200
U6	ENSMUSG00000088915	2	79188522	79188624
U6	ENSMUSG00000064669	2	80398842	80398944
SNORA17	ENSMUSG00000077404	2	80547746	80547872
Mapk8ip1	ENSMUSG00000027223	2	92223833	92241420
Cry2	ENSMUSG00000068742	2	92243803	92274200
Slc35c1	ENSMUSG00000049922	2	92292921	92300695
Chst1	ENSMUSG00000027221	2	92439864	92455407
Syt13	ENSMUSG00000027220	2	92755255	92796215
Prdm11	ENSMUSG00000075028	2	92805308	92886324
Trp53i11	ENSMUSG00000068735	2	93027705	93041916
Tspan18	ENSMUSG00000027217	2	93041917	93174662
Tspan18	ENSMUSG00000023461	2	93151420	93174663
Cd82	ENSMUSG00000027215	2	93259268	93303297
Gm10803	ENSMUSG00000075024	2	93400725	93404518
Alx4	ENSMUSG00000040310	2	93482541	93521496
Ext2	ENSMUSG00000027198	2	93535788	93662725
Accs	ENSMUSG00000040272	2	93673624	93690100
Accsl	ENSMUSG00000075023	2	93695518	93709314
Alkbh3	ENSMUSG00000040174	2	93820707	93850964
Hsd17b12	ENSMUSG00000027195	2	93872846	93998121
Ttc17	ENSMUSG00000027194	2	94140924	94246846
D930015M05Rik	ENSMUSG00000084781	2	92249049	92272465
Gm13814	ENSMUSG00000085261	2	92324083	92369966
Gm13817	ENSMUSG00000085293	2	92369850	92381136
Gm13815	ENSMUSG00000080860	2	92401426	92401837
Gm13816	ENSMUSG00000085976	2	92582387	92599365
Gm13791	ENSMUSG00000086980	2	92696324	92753820
Gm13792	ENSMUSG00000082700	2	92713044	92713466
4631405J19Rik	ENSMUSG00000075027	2	92868113	92884889
Gm13802	ENSMUSG00000087559	2	92926099	92938401
Gm13807	ENSMUSG00000085852	2	93243704	93257987
Gm10804	ENSMUSG00000075025	2	93292976	93310028
Gm13818	ENSMUSG00000081353	2	93634727	93635241
Gm1335	ENSMUSG00000083009	2	93780456	93781035
Gm13889	ENSMUSG00000087006	2	93795967	93797684
Gm13889	ENSMUSG00000075021	2	93796536	93797284
4921507L20Rik	ENSMUSG00000027196	2	93820191	93823732
E530001K10Rik	ENSMUSG00000075020	2	94092036	94104915
Itpa-ps1	ENSMUSG00000081476	2	94224659	94225255
AL683878.1	ENSMUSG00000093033	2	94024184	94024287
AL683882.1	ENSMUSG00000077883	2	93023045	93023131
AL732472.1	ENSMUSG00000078012	2	93738199	93738290
5S_rRNA	ENSMUSG00000089073	2	93226884	93226986
Mir129-2	ENSMUSG00000065511	2	94081521	94081610
Mir670	ENSMUSG00000076335	2	94101457	94101556
Api5	ENSMUSG00000027193	2	94251839	94278293
2810002D19Rik	ENSMUSG00000045464	2	94246308	94251839
Gm13788	ENSMUSG00000083204	2	94430978	94431578
SNORA17	ENSMUSG00000077678	2	94462115	94462245
Gm13793	ENSMUSG00000087069	2	94569171	94570895
SNORA17	ENSMUSG00000077281	2	94632362	94632493
Gm13795	ENSMUSG00000080739	2	95164847	95165141
Gm13794	ENSMUSG00000084906	2	95234399	95237808
Gm13796	ENSMUSG00000083739	2	95515934	95516246
Gm13798	ENSMUSG00000081757	2	95517874	95518012
Gm13797	ENSMUSG00000083846	2	95538074	95538193
Gm13799	ENSMUSG00000087537	2	95678245	95680751
Gm13800	ENSMUSG00000083797	2	95911686	95911851
Gm13801	ENSMUSG00000082327	2	95973592	95973751
Lrrc4c	ENSMUSG00000050587	2	96158326	97471823
4930445B16Rik	ENSMUSG00000091061	2	96827175	96923718
Gm17075	ENSMUSG00000091288	2	96839781	96840450
Gm17076	ENSMUSG00000090449	2	96880069	96881469
SNORA42	ENSMUSG00000084460	2	96957571	96957693
SNORA17	ENSMUSG00000088633	2	97077975	97078103
SNORA42	ENSMUSG00000088624	2	97112368	97112496
Gm13803	ENSMUSG00000082820	2	97789348	97789836
Gm13805	ENSMUSG00000081015	2	98022722	98022825
Gm13804	ENSMUSG00000080802	2	98131560	98131731
U7	ENSMUSG00000089402	2	98158825	98158890
Gm10801	ENSMUSG00000075015	2	98502394	98504240
Gm10800	ENSMUSG00000075014	2	98506704	98507458
Gm13806	ENSMUSG00000082862	2	98441187	98441511
Gm13809	ENSMUSG00000084313	2	99395408	99396035
Gm13808	ENSMUSG00000082259	2	99899090	99899273
Gm13811	ENSMUSG00000084209	2	100176360	100176615
Gm13813	ENSMUSG00000082435	2	100247650	100248436
Gm13812	ENSMUSG00000081682	2	100300345	100301691
Gm13810	ENSMUSG00000082972	2	100466854	100468200
Prokr2	ENSMUSG00000050558	2	132163469	132211183
Rassf2	ENSMUSG00000027339	2	131815151	131855994
Prnd	ENSMUSG00000027338	2	131735693	131781866
1110034G24Rik	ENSMUSG00000044991	2	132512667	132576791
Chgb	ENSMUSG00000027350	2	132607014	132620815
Adra1d	ENSMUSG00000027335	2	131371586	131388021
4930425F17Rik	ENSMUSG00000062501	2	131473561	131474330
Erv3	ENSMUSG00000037482	2	131679414	131685483
Prnp	ENSMUSG00000079037	2	131735664	131764165
5730494N06Rik	ENSMUSG00000027341	2	132065228	132073543
Gm14232	ENSMUSG00000087405	2	130985273	130997078
Gm14233	ENSMUSG00000086329	2	131124281	131125571
Gm14284	ENSMUSG00000082044	2	131147824	131148102
Gm14283	ENSMUSG00000081652	2	131240657	131240981
Gm14304	ENSMUSG00000083671	2	131279864	131280376
Gm14285	ENSMUSG00000087524	2	131387350	131388915
Gm14280	ENSMUSG00000086831	2	131478633	131547574
5330413P13Rik	ENSMUSG00000086822	2	131645742	131673396
Gm14282	ENSMUSG00000081422	2	131671092	131671331
Gm14281	ENSMUSG00000083469	2	131672131	131673424
Lamr1-ps1	ENSMUSG00000081229	2	131729822	131730695
Gm14052	ENSMUSG00000082990	2	131925605	131926635
Gm14051	ENSMUSG00000086756	2	131970269	132045986
AV099323	ENSMUSG00000087377	2	132079093	132087069
4921508D12Rik	ENSMUSG00000027345	2	132250477	132278235
Gm14095	ENSMUSG00000086250	2	132308948	132326884
1700026D11Rik	ENSMUSG00000086379	2	132316370	132349793
AU019990	ENSMUSG00000074783	2	132423931	132478804
Rpl23a-ps4	ENSMUSG00000081445	2	132487978	132488432
Gm14099	ENSMUSG00000084089	2	132499121	132499725
Gm14098	ENSMUSG00000081662	2	132504005	132504975
Gm14097	ENSMUSG00000084839	2	132520168	132524259
Gm14104	ENSMUSG00000086575	2	132671735	132672992
Gm14102	ENSMUSG00000086478	2	132784178	132785541
Gm14101	ENSMUSG00000084393	2	132805905	132806904
Gm14103	ENSMUSG00000082940	2	132872923	132873288
Gpcpd1	ENSMUSG00000027346	2	132354818	132413465
Trmt6	ENSMUSG00000037376	2	132629943	132641791
Mcm8	ENSMUSG00000027353	2	132641877	132669933
Crls1	ENSMUSG00000027357	2	132672402	132692521
Lrrn4	ENSMUSG00000043110	2	132694041	132706627
Fermt1	ENSMUSG00000027356	2	132729915	132771772
Slc23a2	ENSMUSG00000027340	2	131878232	131970844
1700037H04Rik	ENSMUSG00000027327	2	130972060	130985817
Spef1	ENSMUSG00000027329	2	130995997	131013018
Cenpb	ENSMUSG00000068267	2	131000918	131005803
Cdc25b	ENSMUSG00000027330	2	131012685	131024233
2310035K24Rik	ENSMUSG00000068264	2	131032814	131039250
Mavs	ENSMUSG00000037523	2	131059799	131073761
Pank2	ENSMUSG00000037514	2	131088231	131124924
Rnf24	ENSMUSG00000048911	2	131123800	131178628
Smox	ENSMUSG00000027333	2	131317232	131351658
Pcna	ENSMUSG00000027342	2	132074898	132079050
Cds2	ENSMUSG00000058793	2	132088884	132137786
U1	ENSMUSG00000065050	2	132834223	132834390
U6	ENSMUSG00000064413	2	132542842	132542944
RNaseP_nuc	ENSMUSG00000089113	2	131239397	131239698
AL831731.1	ENSMUSG00000092654	2	131393747	131393818
Mir103-2	ENSMUSG00000065563	2	131113788	131113873
Gm14094	ENSMUSG00000083689	2	133025347	133025956
A430048G15Rik	ENSMUSG00000086650	2	133257831	133279098
Gm14100	ENSMUSG00000087585	2	133288854	133291520
Bmp2	ENSMUSG00000027358	2	133377895	133388621
Mir3090	ENSMUSG00000093338	2	133390444	133390530
U6	ENSMUSG00000064983	2	133410051	133410157
Dnttip1	ENSMUSG00000017299	2	164571483	164594107
Ube2c	ENSMUSG00000001403	2	164595398	164604322
Tnnc2	ENSMUSG00000017300	2	164602661	164605467
Snx21	ENSMUSG00000050373	2	164611323	164619316
Acot8	ENSMUSG00000017307	2	164618268	164630382
Zswim3	ENSMUSG00000045822	2	164630598	164647630
Zswim1	ENSMUSG00000017764	2	164648186	164652371
1700020C07Rik	ENSMUSG00000017767	2	164651889	164654037
Neurl2	ENSMUSG00000039873	2	164656232	164658956
Ctsa	ENSMUSG00000017760	2	164658373	164666532
Pltp	ENSMUSG00000017754	2	164665018	164683211
Pcif1	ENSMUSG00000039849	2	164704804	164719954
Zfp335	ENSMUSG00000039834	2	164717382	164737257
Mmp9	ENSMUSG00000017737	2	164766280	164781350
Slc12a5	ENSMUSG00000017740	2	164786316	164825228
Ncoa5	ENSMUSG00000039804	2	164825857	164860367
Cd40	ENSMUSG00000017652	2	164881127	164898448
1700025C18Rik	ENSMUSG00000078935	2	164904193	164916250
Cdh22	ENSMUSG00000053166	2	164937007	165060353
Slc35c2	ENSMUSG00000017664	2	165102054	165113369
Elmo2	ENSMUSG00000017670	2	165113531	165151979
Zfp663	ENSMUSG00000056824	2	165176797	165194229
Zfp334	ENSMUSG00000017667	2	165199764	165213759
Ocstamp	ENSMUSG00000027670	2	165219260	165225905
Slc13a3	ENSMUSG00000018459	2	165230528	165298730
2810408M09Rik	ENSMUSG00000039725	2	165315610	165318824
Slc2a10	ENSMUSG00000027661	2	165329287	165345417
Eya2	ENSMUSG00000017897	2	165480798	165597227
Zmynd8	ENSMUSG00000039671	2	165609654	165724516
Ncoa3	ENSMUSG00000027678	2	165818136	165898742
Sulf2	ENSMUSG00000006800	2	165898589	165981163
Prex1	ENSMUSG00000039621	2	166391842	166539332
Gm11457	ENSMUSG00000086453	2	164579742	164595166
Gm11458	ENSMUSG00000085436	2	164736854	164745453
Gm11459	ENSMUSG00000087503	2	164786302	164788252
Gm14397	ENSMUSG00000086630	2	164984912	164989469
Gm14437	ENSMUSG00000085358	2	165267764	165275985
Gm11460	ENSMUSG00000081758	2	165491997	165492357
BC046401	ENSMUSG00000085274	2	165683184	165684534
Gm11465	ENSMUSG00000086820	2	165705525	165707556
Gm11461	ENSMUSG00000083264	2	165750766	165751341
Gm11462	ENSMUSG00000082924	2	165785289	165785850
Gm11463	ENSMUSG00000084816	2	165802257	165811424
Gm11464	ENSMUSG00000087351	2	165806226	165818017
Gm11466	ENSMUSG00000085618	2	166015293	166016362
Gm11467	ENSMUSG00000085046	2	166032730	166034127
Gm11468	ENSMUSG00000084840	2	166099408	166120331
Gm14268	ENSMUSG00000087617	2	166206328	166223687
5031425F14Rik	ENSMUSG00000085129	2	166272951	166284732
Gm11469	ENSMUSG00000081123	2	166325773	166326268
Gm14267	ENSMUSG00000085682	2	166327601	166331084
BX323066.1	ENSMUSG00000093174	2	164637044	164637321
AL732357.1	ENSMUSG00000093063	2	166480527	166480642
AL591712.1	ENSMUSG00000092942	2	165635081	165635380
SNORA48	ENSMUSG00000087800	2	165095546	165095676
AL589902.1	ENSMUSG00000092796	2	165733551	165733675
7SK	ENSMUSG00000089145	2	166507574	166507920
5S_rRNA	ENSMUSG00000088926	2	166015197	166015301
7SK	ENSMUSG00000088226	2	164587159	164587474
Trp53rk	ENSMUSG00000042854	2	166618031	166625005
U6	ENSMUSG00000088063	2	166594245	166594347
Arfgef2	ENSMUSG00000074582	2	166631088	166723552
Gm14401	ENSMUSG00000078872	2	176859025	176872052
Gm14410	ENSMUSG00000078870	2	176968158	176991126
Gm14409	ENSMUSG00000078869	2	177049359	177051741
Gm14412	ENSMUSG00000078868	2	177099225	177109012
Gm14418	ENSMUSG00000078867	2	177171829	177183025
Gm14420	ENSMUSG00000078866	2	177249438	177262834
Gm14403	ENSMUSG00000067480	2	177282920	177297014
Gm14406	ENSMUSG00000078865	2	177353909	177362915
Gm14322	ENSMUSG00000078864	2	177493993	177505177
Gm14325	ENSMUSG00000078863	2	177566496	177575041
Gm14327	ENSMUSG00000074521	2	177631801	177640489
C330013J21Rik	ENSMUSG00000074529	2	177638045	177660318
Gm14326	ENSMUSG00000078862	2	177670698	177692002
Etohi1	ENSMUSG00000074519	2	177757989	177768727
Zfp931	ENSMUSG00000078861	2	177802400	177813181
Phactr3	ENSMUSG00000027525	2	177853680	178073197
Sycp2	ENSMUSG00000060445	2	178079998	178142390
Ppp1r3d	ENSMUSG00000049999	2	178145911	178149177
9030418K01Rik	ENSMUSG00000070476	2	178149229	178159133
Cdh26	ENSMUSG00000039155	2	178165236	178222071
Gm14314	ENSMUSG00000082215	2	178754824	178755838
Gm14428	ENSMUSG00000083702	2	177715239	177717405
Gm17513	ENSMUSG00000090944	2	177758513	177763441
Gm14421	ENSMUSG00000083111	2	176838221	176841543
Gm14407	ENSMUSG00000082023	2	176870061	176870507
Gm14415	ENSMUSG00000082377	2	176888269	176891193
Gm14411	ENSMUSG00000082765	2	176910168	176912414
Gm14416	ENSMUSG00000082724	2	176923365	176927036
Gm14413	ENSMUSG00000081590	2	176951995	176957575
Gm14400	ENSMUSG00000083817	2	177010178	177013668
Gm14404	ENSMUSG00000082343	2	177204607	177207641
Gm14414	ENSMUSG00000083619	2	177244910	177245589
Gm16363	ENSMUSG00000085513	2	177326386	177327262
Gm14324	ENSMUSG00000080709	2	177469005	177473462
Gm14429	ENSMUSG00000081574	2	177586857	177590208
Gm14323	ENSMUSG00000082901	2	177627343	177627969
4930591A17Rik	ENSMUSG00000039138	2	179149641	179151587
Cdh4	ENSMUSG00000000305	2	179177136	179634078
Gm14292	ENSMUSG00000061897	2	178912130	178912585
Gm14293	ENSMUSG00000081481	2	178975195	178975771
Gm14294	ENSMUSG00000081882	2	179098998	179099748
Gm14300	ENSMUSG00000083410	2	179347327	179348272
Gm10711	ENSMUSG00000074518	2	179628614	179629398
Taf4a	ENSMUSG00000039117	2	179646851	179711351
Lsm14b	ENSMUSG00000039108	2	179759692	179770170
Psma7	ENSMUSG00000027566	2	179771078	179777138
Ss18l1	ENSMUSG00000039086	2	179777214	179804906
Gtpbp5	ENSMUSG00000039069	2	179805293	179820607
4921531C22Rik	ENSMUSG00000085704	2	179710698	179713718
Gm14299	ENSMUSG00000082850	2	179727893	179728289
AL663067.1	ENSMUSG00000080507	2	179725502	179725587
Hrh3	ENSMUSG00000039059	2	179834170	179839193
Gm17180	ENSMUSG00000090589	2	179834618	179836207
Chmp4c	ENSMUSG00000027536	3	10366907	10391005
Snx16	ENSMUSG00000027534	3	10417819	10440124
Gm8910	ENSMUSG00000069106	3	11013518	11015193
Pmp2	ENSMUSG00000052468	3	10179851	10183885
Fabp9	ENSMUSG00000027528	3	10193626	10197222
Fabp4	ENSMUSG00000062515	3	10204347	10208576
Fabp12	ENSMUSG00000027530	3	10244209	10301183
Impa1	ENSMUSG00000027531	3	10313540	10331439
Slc10a5	ENSMUSG00000058921	3	10331734	10335656
Zfand1	ENSMUSG00000039795	3	10339953	10351317
AC127294.1	ENSMUSG00000093022	3	11154337	11154437
SNORA17	ENSMUSG00000087858	3	10975469	10975586
Gm8935	ENSMUSG00000045699	3	12855996	12856403
Gm2464	ENSMUSG00000078587	3	13471906	13474596
Ralyl	ENSMUSG00000039717	3	13776848	14182287
7SK	ENSMUSG00000088546	3	13845686	13845980
7SK	ENSMUSG00000084684	3	14029482	14029762
SNORA17	ENSMUSG00000089231	3	14267315	14267439
U7	ENSMUSG00000088540	3	14401731	14401788
Gm15496	ENSMUSG00000085953	3	31184509	31215813
Gm15574	ENSMUSG00000081883	3	32778933	32779530
Kcnmb3	ENSMUSG00000091091	3	32371243	32390891
Phc3	ENSMUSG00000037652	3	30798217	30868337
Prkci	ENSMUSG00000037643	3	30894669	30951663
Skil	ENSMUSG00000027660	3	30993980	31021499
Cldn11	ENSMUSG00000037625	3	31048868	31063246
Slc7a14	ENSMUSG00000069072	3	31101832	31209300
Kcnmb2	ENSMUSG00000037610	3	31801429	32099102
Zmat3	ENSMUSG00000027663	3	32233718	32264600
4930429B21Rik	ENSMUSG00000049507	3	32264697	32266358
Pik3ca	ENSMUSG00000027665	3	32296593	32367408
Ndufb5	ENSMUSG00000027673	3	32635912	32650488
Usp13	ENSMUSG00000056900	3	32716468	32836993
Zfp639	ENSMUSG00000027667	3	32414217	32419607
Mfn1	ENSMUSG00000027668	3	32428387	32478161
Gnb4	ENSMUSG00000027669	3	32479254	32515507
Actl6a	ENSMUSG00000027671	3	32607468	32625890
Mrpl47	ENSMUSG00000037531	3	32624319	32636069
Pex5l	ENSMUSG00000027674	3	32848553	33042169
4930419G24Rik	ENSMUSG00000087625	3	32923699	32987529
U4	ENSMUSG00000084665	3	32910880	32911036
Pcdh10	ENSMUSG00000049100	3	45182320	45238488
2610316D01Rik	ENSMUSG00000086101	3	45084362	45182182
U1	ENSMUSG00000064579	3	45621658	45621820
U6	ENSMUSG00000088535	3	44787122	44787226
U6	ENSMUSG00000089584	3	45782500	45782617
SNORA17	ENSMUSG00000077256	3	46093755	46093886
Kcnab1	ENSMUSG00000027827	3	64913306	65182145
Ssr3	ENSMUSG00000027828	3	65183577	65196545
4931440P22Rik	ENSMUSG00000074580	3	65311179	65333301
Tiparp	ENSMUSG00000034640	3	65332332	65359067
Lekr1	ENSMUSG00000074579	3	65470150	65635084
Ccnl1	ENSMUSG00000027829	3	65750073	65762171
Veph1	ENSMUSG00000027831	3	65857483	66100759
Ptx3	ENSMUSG00000027832	3	66023809	66029728
Shox2	ENSMUSG00000093425	3	66775217	66785693
Shox2	ENSMUSG00000027833	3	66775649	66785693
Rsrc1	ENSMUSG00000034544	3	66785312	67162318
A730090N16Rik	ENSMUSG00000090120	3	65128698	65153351
Gm5540	ENSMUSG00000048916	3	65197259	65199106
U6	ENSMUSG00000065330	3	65575433	65575539
U6	ENSMUSG00000065245	3	66859880	66859986
U1	ENSMUSG00000064522	3	65892031	65892183
U6	ENSMUSG00000087825	3	65329623	65329715
Gm17402	ENSMUSG00000090408	3	67169383	67179085
Mlf1	ENSMUSG00000048416	3	67178019	67203925
Gfm1	ENSMUSG00000027774	3	67234018	67280451
Lxn	ENSMUSG00000047557	3	67261920	67267848
Rarres1	ENSMUSG00000049404	3	67282894	67319445
Mfsd1	ENSMUSG00000027775	3	67386690	67408153
Iqcj	ENSMUSG00000051777	3	67696142	67860515
Schip1	ENSMUSG00000027777	3	67868864	68430404
Gm5848	ENSMUSG00000068979	3	68112747	68113103
Il12a	ENSMUSG00000027776	3	68494566	68502469
Gm17641	ENSMUSG00000091272	3	68671839	68674188
1110032F04Rik	ENSMUSG00000046999	3	68673508	68676085
Ift80	ENSMUSG00000027778	3	68696421	68808492
Smc4	ENSMUSG00000034349	3	68808660	68838545
Trim59	ENSMUSG00000034317	3	68839210	68848677
Kpna4	ENSMUSG00000027782	3	68871071	68931035
Gm10040	ENSMUSG00000058360	3	68537059	68541999
RP24-399B3.3	ENSMUSG00000093384	3	68704093	68704371
RP24-399B3.4	ENSMUSG00000093730	3	68705752	68706066
Gm18588	ENSMUSG00000093402	3	68706189	68706680
RP24-399B3.1	ENSMUSG00000093505	3	68707742	68708074
Mir16-2	ENSMUSG00000065606	3	68813824	68813918
U2	ENSMUSG00000084617	3	68351442	68351630
SNORA17	ENSMUSG00000077459	3	67377082	67377213
snoU90	ENSMUSG00000089417	3	68889027	68889369
Mir15b	ENSMUSG00000065580	3	68813678	68813775
Ppm1l	ENSMUSG00000027784	3	69120783	69364724
Arl14	ENSMUSG00000027783	3	69026341	69027538
Gm17214	ENSMUSG00000091315	3	69123967	69124507
Gm17212	ENSMUSG00000090941	3	69139424	69139682
Gm17213	ENSMUSG00000090743	3	69234931	69236290
B3galnt1	ENSMUSG00000043300	3	69378108	69402783
Rpl32-ps	ENSMUSG00000068969	3	69520908	69521315
Nmd3	ENSMUSG00000027787	3	69525907	69552964
1110032A04Rik	ENSMUSG00000043461	3	69623460	69663818
Otol1	ENSMUSG00000027788	3	69811535	69832630
SNORA17	ENSMUSG00000077366	3	69766237	69766367
5S_rRNA	ENSMUSG00000087848	3	69489389	69489502
SNORA17	ENSMUSG00000089507	3	70032669	70032796
Gm10780	ENSMUSG00000074877	3	70493014	70493302
Gm6634	ENSMUSG00000086538	3	70576301	70611213
Sis	ENSMUSG00000027790	3	72692479	72771785
Slitrk3	ENSMUSG00000048304	3	72852048	72860865
U2	ENSMUSG00000084752	3	72541753	72541903
7SK	ENSMUSG00000088794	3	73011625	73011923
AC131665.1	ENSMUSG00000077050	3	72950771	72950880
Bche	ENSMUSG00000027792	3	73439730	73512337
Gm12449	ENSMUSG00000081183	3	99267515	99267748
M6pr-ps	ENSMUSG00000080832	3	99303947	99306568
Gm12448	ENSMUSG00000083938	3	99348370	99348891
Gm12450	ENSMUSG00000083504	3	99532020	99532487
Rpl36-ps7	ENSMUSG00000080754	3	99812283	99812597
Gm12457	ENSMUSG00000082763	3	99882400	99882567
B930086A06Rik	ENSMUSG00000085244	3	99904607	99910818
Gm12464	ENSMUSG00000081440	3	100217483	100218483
4930406D18Rik	ENSMUSG00000086923	3	100230328	100241677
Gm12474	ENSMUSG00000053957	3	100293587	100327843
Gm12485	ENSMUSG00000083842	3	100484188	100484478
Gm12488	ENSMUSG00000082000	3	100759364	100759862
Gm12486	ENSMUSG00000082415	3	101010782	101011322
Tpt1-ps1	ENSMUSG00000083546	3	101037383	101037818
Tbx15	ENSMUSG00000027868	3	99044304	99158182
Spag17	ENSMUSG00000027867	3	99689329	99947245
Wdr3	ENSMUSG00000033285	3	99942103	99966330
Gdap2	ENSMUSG00000027865	3	99966304	100010904
Ttf2	ENSMUSG00000033222	3	100742783	100773586
Cd101	ENSMUSG00000086564	3	100797453	100833479
Ptgfrn	ENSMUSG00000027864	3	100844155	100914201
Fam46c	ENSMUSG00000044468	3	100255551	100293247
Man1a2	ENSMUSG00000008763	3	100366130	100489426
Vtcn1	ENSMUSG00000051076	3	100629382	100699602
Trim45	ENSMUSG00000033233	3	100726125	100740848
SNORD81	ENSMUSG00000064573	3	100107211	100107287
U6	ENSMUSG00000064890	3	99511663	99511770
7SK	ENSMUSG00000087759	3	100542375	100542636
Slc16a1	ENSMUSG00000032902	3	104442591	104462385
Fam19a3	ENSMUSG00000055865	3	104570324	104584758
Ppm1j	ENSMUSG00000002228	3	104583974	104588936
Rhoc	ENSMUSG00000002233	3	104591929	104597377
Mov10	ENSMUSG00000002227	3	104597754	104621481
Capza1	ENSMUSG00000070372	3	104625697	104667423
St7l	ENSMUSG00000045576	3	104667421	104730812
Wnt2b	ENSMUSG00000027840	3	104747723	104764627
Cttnbp2nl	ENSMUSG00000062127	3	104804833	104856064
4930564D02Rik	ENSMUSG00000051788	3	104869762	104881724
Kcnd3	ENSMUSG00000040896	3	105255248	105476920
Ddx20	ENSMUSG00000027905	3	105481178	105490492
6530418L21Rik	ENSMUSG00000048458	3	105507517	105523760
Rap1a	ENSMUSG00000068798	3	105530185	105604248
Adora3	ENSMUSG00000000562	3	105673776	105711846
Adora3	ENSMUSG00000074344	3	105673825	105726954
I830077J02Rik	ENSMUSG00000074342	3	105728809	105735582
Atp5f1	ENSMUSG00000000563	3	105745616	105763017
Wdr77	ENSMUSG00000000561	3	105762287	105787518
Ovgp1	ENSMUSG00000074340	3	105776629	105790341
1700027A23Rik	ENSMUSG00000010136	3	105799875	105817523
Chi3l7	ENSMUSG00000043873	3	105819837	105835813
Gm4540	ENSMUSG00000092072	3	105837628	105837921
Chia	ENSMUSG00000062778	3	105916147	105935038
Chi3l3	ENSMUSG00000040809	3	105950472	106022425
Chi3l4	ENSMUSG00000063779	3	106004408	106022425
BC051070	ENSMUSG00000027902	3	106190306	106209100
2010016I18Rik	ENSMUSG00000091575	3	106284931	106286355
Dennd2d	ENSMUSG00000027901	3	106285323	106305948
Cept1	ENSMUSG00000040774	3	106305178	106350720
Dram2	ENSMUSG00000027900	3	106350611	106377763
Gm6485	ENSMUSG00000089999	3	104555645	104556083
1700095B22Rik	ENSMUSG00000074346	3	105244513	105255873
U6	ENSMUSG00000084653	3	104405081	104405162
U6	ENSMUSG00000089452	3	104504793	104504882
4933421E11Rik	ENSMUSG00000056260	3	106487905	106539495
Cd53	ENSMUSG00000040747	3	106561779	106593067
Olfr266	ENSMUSG00000043529	3	106624474	106625500
Kcna3	ENSMUSG00000047959	3	106839080	106841047
AI504432	ENSMUSG00000056145	3	106842422	106854070
A930002I21Rik	ENSMUSG00000050179	3	106893880	106901319
Kcna2	ENSMUSG00000040724	3	106904485	106909797
Kcna10	ENSMUSG00000042861	3	106985974	106998639
Cym	ENSMUSG00000046213	3	107014211	107024650
Prok1	ENSMUSG00000070368	3	107038449	107042625
Hbxip	ENSMUSG00000087260	3	107081776	107086997
Slc16a4	ENSMUSG00000027896	3	107094148	107115033
Rbm15	ENSMUSG00000048109	3	107128863	107136591
7SK	ENSMUSG00000084640	3	107218781	107219113
Kcnc4	ENSMUSG00000027895	3	107241221	107261816
Slc6a17	ENSMUSG00000027894	3	107270461	107320936
Ubl4b	ENSMUSG00000055891	3	107356616	107357991
Alx3	ENSMUSG00000092379	3	107397949	107408792
Alx3	ENSMUSG00000014603	3	107397949	107408687
Fam40a	ENSMUSG00000014601	3	107415450	107434628
Gm10961	ENSMUSG00000078604	3	107434240	107436008
Ahcyl1	ENSMUSG00000027893	3	107466036	107499478
Csf1	ENSMUSG00000014599	3	107543966	107563387
Eps8l3	ENSMUSG00000040600	3	107680148	107695817
Gstm5	ENSMUSG00000004032	3	107698739	107701604
4933431E20Rik	ENSMUSG00000086968	3	107691768	107699131
Gstm7	ENSMUSG00000004035	3	107729252	107734735
Gstm6	ENSMUSG00000068762	3	107741765	107746667
Gstm3	ENSMUSG00000004038	3	107745251	107772201
Gstm2	ENSMUSG00000040562	3	107784620	107789371
Gm12489	ENSMUSG00000082720	3	107722580	107722727
Gm12494	ENSMUSG00000089664	3	107746163	107756354
Gm12497	ENSMUSG00000049231	3	107782550	107782786
Gstm1	ENSMUSG00000058135	3	107815173	107820891
Gstm4	ENSMUSG00000027890	3	107843326	107847812
Gm12498	ENSMUSG00000087357	3	107821212	107828167
Gm12502	ENSMUSG00000083627	3	107822803	107823246
Gm12499	ENSMUSG00000081688	3	107832518	107834279
SNORA71	ENSMUSG00000064569	3	107836944	107837074
Ampd2	ENSMUSG00000027889	3	107876980	107889569
Gm12500	ENSMUSG00000056411	3	107888894	107890927
Gnat2	ENSMUSG00000009108	3	107895707	107904350
Gnai3	ENSMUSG00000000001	3	107910198	107949064
Gpr61	ENSMUSG00000046793	3	107951239	107957800
Amigo1	ENSMUSG00000050947	3	107989253	107995204
Gm12524	ENSMUSG00000085318	3	107969361	107988825
Cyb561d1	ENSMUSG00000048796	3	107998605	108004130
Atxn7l2	ENSMUSG00000048997	3	108005140	108013852
Sypl2	ENSMUSG00000027887	3	108014390	108029566
Gm12501	ENSMUSG00000083462	3	108042301	108042829
1700010K24Rik	ENSMUSG00000085102	3	108051827	108059903
Psma5	ENSMUSG00000068749	3	108059844	108082892
Sort1	ENSMUSG00000068747	3	108087009	108164429
Gm12523	ENSMUSG00000084863	3	108086816	108087761
Mybphl	ENSMUSG00000068745	3	108167829	108182974
Gm12525	ENSMUSG00000078601	3	108164469	108165174
Psrc1	ENSMUSG00000068744	3	108186757	108191149
Celsr2	ENSMUSG00000068740	3	108193769	108218470
Gm12522	ENSMUSG00000074281	3	108182195	108186659
4833424O15Rik	ENSMUSG00000033342	3	117278145	117392425
Snx7	ENSMUSG00000028007	3	117484415	117571854
Dpyd	ENSMUSG00000033308	3	118265047	119135836
snoCD11	ENSMUSG00000089572	3	119038815	119038884
AC122183.1	ENSMUSG00000093000	3	118137639	118137748
AC115933.1	ENSMUSG00000093054	3	117551471	117551570
Mir137	ENSMUSG00000065569	3	118136761	118136862
Negr1	ENSMUSG00000040037	3	156224758	156979409
4930566N20Rik	ENSMUSG00000054773	3	156870626	156871824
Zranb2	ENSMUSG00000028180	3	157197124	157211354
Ptger3	ENSMUSG00000040016	3	157229856	157307722
Cth	ENSMUSG00000028179	3	157557212	157588041
Ankrd13c	ENSMUSG00000039988	3	157610378	157670288
Srsf11	ENSMUSG00000055436	3	157673437	157699603
Lrrc40	ENSMUSG00000063052	3	157699626	157731442
Lrrc7	ENSMUSG00000028176	3	157745859	158225185
Gm15578	ENSMUSG00000083122	3	156479001	156479475
Gm15577	ENSMUSG00000086708	3	156566827	156583744
1810013D15Rik	ENSMUSG00000028177	3	157588233	157590111
U6	ENSMUSG00000064510	3	157028962	157029068
U6	ENSMUSG00000064557	3	157061226	157061332
U6	ENSMUSG00000065172	3	156900189	156900295
Mir186	ENSMUSG00000065431	3	157207243	157207313
SNORA17	ENSMUSG00000077581	3	156873893	156874024
AC170189.1	ENSMUSG00000093095	3	156732338	156732418
2610301B20Rik	ENSMUSG00000059482	4	10801645	10826572
Plekhf2	ENSMUSG00000049969	4	10915809	10935074
2310030N02Rik	ENSMUSG00000050323	4	10978192	11003352
Trp53inp1	ENSMUSG00000028211	4	11083578	11101526
Ccne2	ENSMUSG00000028212	4	11118498	11131926
Ints8	ENSMUSG00000040738	4	11126305	11181405
Dpy19l4	ENSMUSG00000045205	4	11188462	11249284
Esrp1	ENSMUSG00000040728	4	11259080	11313930
Gm17283	ENSMUSG00000067549	4	11336959	11407948
1110037F02Rik	ENSMUSG00000040720	4	11413105	11477831
Rad54b	ENSMUSG00000078773	4	11486096	11542952
Rad54b	ENSMUSG00000066307	4	11506812	11511983
Gem	ENSMUSG00000028214	4	11631604	11641899
Cdh17	ENSMUSG00000028217	4	11685294	11745042
Pdp1	ENSMUSG00000049225	4	11885331	11893599
Gm10604	ENSMUSG00000073995	4	11906707	11908412
Tmem67	ENSMUSG00000049488	4	11966502	12017167
C430048L16Rik	ENSMUSG00000052137	4	12016586	12023390
Rbm12b	ENSMUSG00000046667	4	12067411	12073878
Fam92a	ENSMUSG00000028218	4	12080556	12099162
Gm16652	ENSMUSG00000086492	4	11249091	11270100
Gm17454	ENSMUSG00000090438	4	11907816	11915618
Gm11828	ENSMUSG00000081715	4	10873755	10874240
Gm11827	ENSMUSG00000086765	4	11049952	11054145
Gm11829	ENSMUSG00000083025	4	11060474	11060755
Gm11830	ENSMUSG00000081490	4	11071857	11072417
Gm11821	ENSMUSG00000081884	4	11327493	11328471
Gm11822	ENSMUSG00000082255	4	11347497	11347911
Gm11831	ENSMUSG00000086625	4	11428603	11429986
Gm11832	ENSMUSG00000086103	4	11538286	11542154
Gm11833	ENSMUSG00000084046	4	11576794	11577646
1700123M08Rik	ENSMUSG00000085614	4	11893712	11921427
Gm11840	ENSMUSG00000085027	4	11926621	11936190
Gm11842	ENSMUSG00000085467	4	11954652	11968041
Gm11839	ENSMUSG00000083246	4	12041431	12043383
Gm11841	ENSMUSG00000081593	4	12052437	12054399
Gm11843	ENSMUSG00000082676	4	12058698	12059122
Gm11847	ENSMUSG00000060989	4	12159927	12165171
Gm11846	ENSMUSG00000085909	4	12198546	12241730
AL772167.1	ENSMUSG00000080359	4	11876034	11876097
7SK	ENSMUSG00000084518	4	11855571	11855886
n-R5s182	ENSMUSG00000065823	4	12739853	12739959
U1	ENSMUSG00000089185	4	11206412	11206566
Gm11818	ENSMUSG00000055963	4	12833985	12908618
Gm11820	ENSMUSG00000086227	4	13003287	13023953
AL772302.1	ENSMUSG00000080663	4	13194132	13194197
Gm11819	ENSMUSG00000081327	4	13371917	13372288
Gm11826	ENSMUSG00000083328	4	13409863	13410382
Cnbd1	ENSMUSG00000073991	4	18787601	19049673
Cngb3	ENSMUSG00000056494	4	19207997	19437770
Cpne3	ENSMUSG00000028228	4	19446401	19497255
Fam82b	ENSMUSG00000028229	4	19502309	19534079
Gm12353	ENSMUSG00000078772	4	19532598	19578277
Wwp1	ENSMUSG00000041058	4	19535450	19636140
Slc7a13	ENSMUSG00000041052	4	19745872	19769365
Atp6v0d2	ENSMUSG00000028238	4	19803988	19849752
Ttpa	ENSMUSG00000073988	4	19935085	19957932
Ggh	ENSMUSG00000073987	4	19968857	19993897
Nkain3	ENSMUSG00000055761	4	20046021	20706013
4930598A11Rik	ENSMUSG00000090934	4	19959993	19968711
Gm11867	ENSMUSG00000087402	4	18334496	18818989
Gm11868	ENSMUSG00000050550	4	18771349	18772928
Gm12392	ENSMUSG00000083005	4	18891711	18892648
Gm12393	ENSMUSG00000083105	4	19186243	19187090
Gm11877	ENSMUSG00000082320	4	19225480	19226331
Gm12354	ENSMUSG00000086071	4	19643879	19647346
4930480G23Rik	ENSMUSG00000086332	4	19906592	19912535
Gm11872	ENSMUSG00000086017	4	20270853	20274965
Gm11873	ENSMUSG00000081964	4	20318243	20319546
7SK	ENSMUSG00000089578	4	18635895	18636180
7SK	ENSMUSG00000089090	4	19441637	19441926
7SK	ENSMUSG00000088500	4	18657364	18657695
Gm11871	ENSMUSG00000083315	4	20937027	20938087
RNaseP_nuc	ENSMUSG00000088073	4	21197222	21197577
SNORA17	ENSMUSG00000089322	4	21255667	21255751
Dbc1	ENSMUSG00000028351	4	68422548	68615431
Cdk5rap2	ENSMUSG00000039298	4	69877890	70071477
Gm11404	ENSMUSG00000082553	4	68952655	68956155
Gm11221	ENSMUSG00000082998	4	69353001	69353685
Gm11222	ENSMUSG00000085627	4	69514981	69515718
Gm11223	ENSMUSG00000046341	4	69586235	69587205
Gm11224	ENSMUSG00000084342	4	69615200	69616310
Gm11225	ENSMUSG00000082368	4	69708191	69709239
Gm11226	ENSMUSG00000080902	4	69909670	69910407
U6	ENSMUSG00000065815	4	68771705	68771811
Megf9	ENSMUSG00000039270	4	70088099	70196029
Gm11232	ENSMUSG00000066141	4	71416677	71418999
Tle1	ENSMUSG00000008305	4	71778176	71861953
Gm11227	ENSMUSG00000083549	4	70733707	70734177
Gm11228	ENSMUSG00000084937	4	70736143	70792167
Gm11229	ENSMUSG00000082017	4	70946976	70947412
Rps18-ps1	ENSMUSG00000083914	4	71031729	71032239
Gm11231	ENSMUSG00000082432	4	71339047	71340752
Gm11233	ENSMUSG00000081117	4	71529022	71530011
Gm11234	ENSMUSG00000086696	4	71641511	71660593
Gm11250	ENSMUSG00000086027	4	71829802	71830483
C630043F03Rik	ENSMUSG00000084910	4	71862382	71876386
Gm11235	ENSMUSG00000083372	4	72203700	72204032
Nfib	ENSMUSG00000008575	4	81936077	82351654
Zdhhc21	ENSMUSG00000028403	4	82444642	82505862
Cer1	ENSMUSG00000038192	4	82527655	82531052
Frem1	ENSMUSG00000059049	4	82543825	82698243
Ttc39b	ENSMUSG00000038172	4	82866204	82970159
Snapc3	ENSMUSG00000028483	4	83063628	83113580
Psip1	ENSMUSG00000028484	4	83101584	83132363
Gm10154	ENSMUSG00000066116	4	83151051	83151458
4930473A06Rik	ENSMUSG00000052407	4	83171449	83510635
Gm11266	ENSMUSG00000087413	4	82153920	82193196
Gm11267	ENSMUSG00000084851	4	82230952	82233223
Gm11268	ENSMUSG00000084357	4	82288304	82288570
Gm11269	ENSMUSG00000086293	4	82338709	82339615
Gm11248	ENSMUSG00000082637	4	82767386	82767666
Gm11185	ENSMUSG00000083245	4	82839892	82840898
Gm11413	ENSMUSG00000086321	4	83024221	83036572
Gm11184	ENSMUSG00000087592	4	83028968	83038109
Gm11414	ENSMUSG00000082416	4	83146403	83146665
Cbx3-ps3	ENSMUSG00000080793	4	83346988	83347940
Gm11415	ENSMUSG00000085378	4	83530642	83534762
6030471H07Rik	ENSMUSG00000085217	4	83687943	83690783
Gm12416	ENSMUSG00000083044	4	83750799	83751806
Gm12414	ENSMUSG00000087378	4	83772254	83776193
U6	ENSMUSG00000064951	4	82931708	82931814
U4	ENSMUSG00000064606	4	83173532	83173672
n-R5s188	ENSMUSG00000084595	4	82085314	82085418
SNORA17	ENSMUSG00000089409	4	82724415	82724533
Bnc2	ENSMUSG00000028487	4	83918446	84321179
Gm12421	ENSMUSG00000083743	4	84074722	84075028
Gm12420	ENSMUSG00000081775	4	84343767	84344814
Gm12415	ENSMUSG00000086413	4	84387379	84388195
U7	ENSMUSG00000088738	4	84476091	84476153
Cntln	ENSMUSG00000038070	4	84530213	84777825
Gm12418	ENSMUSG00000083139	4	84561800	84562741
Gm12419	ENSMUSG00000080303	4	84569458	84570093
Sh3gl2	ENSMUSG00000028488	4	84851030	85285099
Gm12417	ENSMUSG00000084267	4	84822431	84822833
Gm12413	ENSMUSG00000081862	4	84891355	84891666
Gm12680	ENSMUSG00000087349	4	85160231	85429031
7SK	ENSMUSG00000088122	4	85555815	85556092
Adamtsl1	ENSMUSG00000066113	4	85699819	86074289
U6	ENSMUSG00000064687	4	85689298	85689398
Fam154a	ENSMUSG00000028492	4	86090545	86204232
Rraga	ENSMUSG00000070934	4	86221577	86223185
Haus6	ENSMUSG00000038047	4	86224759	86257959
Plin2	ENSMUSG00000028494	4	86294290	86315964
Dennd4c	ENSMUSG00000038024	4	86394459	86496507
Gm12550	ENSMUSG00000083272	4	86087917	86088245
4930457A20Rik	ENSMUSG00000085108	4	86204350	86205708
Gm12551	ENSMUSG00000081169	4	86272979	86277155
U6	ENSMUSG00000077597	4	86155056	86155129
Scarna8	ENSMUSG00000088958	4	86232357	86232487
Gm12630	ENSMUSG00000082969	4	86463698	86464481
Rps6	ENSMUSG00000028495	4	86500564	86503316
Acer2	ENSMUSG00000038007	4	86520300	86580726
Acer2	ENSMUSG00000091609	4	86576595	86580724
Slc24a2	ENSMUSG00000037996	4	86629028	86876381
Zfp352	ENSMUSG00000070902	4	89885511	89892393
Elavl2	ENSMUSG00000008489	4	90917454	91067476
Gm12629	ENSMUSG00000085690	4	89852218	89856700
Gm12633	ENSMUSG00000080756	4	90026313	90028017
Gm12634	ENSMUSG00000082569	4	90035422	90036413
Gm12635	ENSMUSG00000081563	4	90119565	90120316
Gm12636	ENSMUSG00000082502	4	90210438	90211061
Gm12632	ENSMUSG00000082622	4	90523574	90524068
Gm12643	ENSMUSG00000079962	4	90704591	90704964
Gm12644	ENSMUSG00000081876	4	90823373	90823978
Gm12653	ENSMUSG00000083377	4	91032070	91032630
Gm12668	ENSMUSG00000085817	4	91293280	91296830
Gm12670	ENSMUSG00000086042	4	91313006	91317843
Gm12667	ENSMUSG00000082523	4	91375329	91376660
Gm12669	ENSMUSG00000049494	4	91472238	91473247
Gm12671	ENSMUSG00000080830	4	91518179	91519431
4930577H14Rik	ENSMUSG00000087517	4	91605545	91606643
SNORA17	ENSMUSG00000077589	4	90664553	90664684
Izumo3	ENSMUSG00000028533	4	91811020	91813925
Gm12666	ENSMUSG00000066107	4	91857435	91858440
Tusc1	ENSMUSG00000054000	4	93000839	93002202
Gm12638	ENSMUSG00000083296	4	92039742	92040039
Gm12637	ENSMUSG00000085209	4	92195242	92214995
Gm12639	ENSMUSG00000081987	4	92636935	92637427
Gm12641	ENSMUSG00000082919	4	92773679	92776605
Gm12642	ENSMUSG00000082325	4	92932104	92932979
Gm12649	ENSMUSG00000084833	4	93119949	93337761
Gm12640	ENSMUSG00000083607	4	93265877	93266186
Gm12650	ENSMUSG00000073797	4	93469024	93469281
U6	ENSMUSG00000077195	4	93267670	93267776
U6	ENSMUSG00000088914	4	92533166	92533273
SNORA61	ENSMUSG00000064850	4	93211841	93211968
AL833773.1	ENSMUSG00000077037	4	93405427	93405536
Gm12651	ENSMUSG00000083724	4	93570715	93571161
5830433M19Rik	ENSMUSG00000028578	4	94166772	94223487
Gm10306	ENSMUSG00000070900	4	94223237	94223769
Gm12647	ENSMUSG00000081685	4	93728064	93728328
Gm12648	ENSMUSG00000085931	4	93756267	94092279
Gm12654	ENSMUSG00000081508	4	94062349	94062935
Gm12655	ENSMUSG00000087128	4	94127622	94143871
Gm12656	ENSMUSG00000083359	4	94163723	94164299
SNORA2	ENSMUSG00000088677	4	94154574	94154674
SNORA61	ENSMUSG00000077622	4	93764981	93765109
7SK	ENSMUSG00000088295	4	94100915	94101175
Plaa	ENSMUSG00000028577	4	94234205	94269935
Tek	ENSMUSG00000006386	4	94405980	94541667
4930579C15Rik	ENSMUSG00000028575	4	94573958	94595534
Mysm1	ENSMUSG00000062627	4	94608731	94645791
Jun	ENSMUSG00000052684	4	94715725	94718913
Fggy	ENSMUSG00000028573	4	95224198	95593630
Hook1	ENSMUSG00000028572	4	95633931	95692104
Cyp2j13	ENSMUSG00000028571	4	95694225	95744237
Cyp2j12	ENSMUSG00000081225	4	95766009	95807843
Cyp2j7-ps	ENSMUSG00000081362	4	95861888	95903350
Cyp2j11	ENSMUSG00000066097	4	95961199	96015353
Cyp2j8	ENSMUSG00000082932	4	96111287	96174077
Cyp2j6	ENSMUSG00000052914	4	96182829	96220352
Cyp2j9	ENSMUSG00000015224	4	96235120	96258269
Cyp2j5	ENSMUSG00000052520	4	96295464	96330845
Gm12695	ENSMUSG00000078639	4	96390338	96451877
Gm12693	ENSMUSG00000083179	4	94602312	94602794
Gm12694	ENSMUSG00000086251	4	94645894	94695235
Gm12703	ENSMUSG00000052767	4	94696654	94715061
Gm12704	ENSMUSG00000081030	4	94705853	94706316
BC042782	ENSMUSG00000087366	4	94718225	94834009
4930551L18Rik	ENSMUSG00000085377	4	94755774	94758110
Gm12708	ENSMUSG00000084918	4	94860004	94876418
Gm830	ENSMUSG00000084939	4	95131415	95154085
Gm12707	ENSMUSG00000085835	4	95150647	95154092
RP23-356F8.3	ENSMUSG00000093492	4	95228522	95228850
9530080O11Rik	ENSMUSG00000044125	4	95626406	95634346
Hspe1-ps6	ENSMUSG00000083880	4	95739115	95739397
Gm12674	ENSMUSG00000080884	4	95818344	95818549
Gm12673	ENSMUSG00000083801	4	95836898	95837076
Gm12675	ENSMUSG00000082681	4	95856762	95856934
Gm12658	ENSMUSG00000084286	4	95912251	95940961
Gm12659	ENSMUSG00000082119	4	96023002	96046902
n-R5s189	ENSMUSG00000084624	4	94729341	94729454
U1	ENSMUSG00000065745	4	95190735	95190895
Gm10192	ENSMUSG00000066990	4	96849531	96849857
E130114P18Rik	ENSMUSG00000048747	4	97234824	97444769
Gm12696	ENSMUSG00000084159	4	97188119	97189023
Gm12697	ENSMUSG00000082683	4	97223095	97223761
Nfia	ENSMUSG00000028565	4	97439425	97868605
Gm12676	ENSMUSG00000085710	4	97420859	97424080
Gm12691	ENSMUSG00000081096	4	97812835	97813290
Gm12692	ENSMUSG00000082388	4	97901436	97901981
Gm12787	ENSMUSG00000083644	4	97934774	97935266
Y_RNA	ENSMUSG00000064883	4	97942416	97942529
Nrd1	ENSMUSG00000053510	4	108673260	108734382
Osbpl9	ENSMUSG00000028559	4	108733750	108874877
Calr4	ENSMUSG00000028558	4	108907090	108927176
Eps15	ENSMUSG00000028552	4	108952873	109060422
Ttc39a	ENSMUSG00000028555	4	109079228	109117350
Rnf11	ENSMUSG00000028557	4	109123703	109157333
4930522H14Rik	ENSMUSG00000060491	4	109177942	109203902
Cdkn2c	ENSMUSG00000028551	4	109333481	109339794
Faf1	ENSMUSG00000010517	4	109349193	109636565
Dmrta2	ENSMUSG00000047143	4	109650658	109656292
Elavl4	ENSMUSG00000028546	4	109876327	110024514
Agbl4	ENSMUSG00000061298	4	110070266	111336929
Gm12749	ENSMUSG00000083512	4	109046306	109047464
Gm12750	ENSMUSG00000085873	4	109076399	109078760
Gm12811	ENSMUSG00000087641	4	109241819	109329396
Gm12803	ENSMUSG00000082771	4	109302187	109303330
9630013D21Rik	ENSMUSG00000059027	4	109324134	109330458
Gm12808	ENSMUSG00000083995	4	109427019	109427422
3010003L10Rik	ENSMUSG00000085256	4	109649343	109650418
Gm12806	ENSMUSG00000081813	4	110182640	110182907
Gm12807	ENSMUSG00000082348	4	110185376	110186337
AL669940.1	ENSMUSG00000093374	4	110112295	110112375
SNORA17	ENSMUSG00000077687	4	109209644	109209774
7SK	ENSMUSG00000088014	4	108833529	108833802
Skint5	ENSMUSG00000078598	4	113150496	113672108
Skint11	ENSMUSG00000057977	4	113835989	113917633
Gm12824	ENSMUSG00000070867	4	114079329	114287703
Gm12830	ENSMUSG00000055198	4	114494327	114528771
Foxd2	ENSMUSG00000055210	4	114578885	114581503
Foxe3	ENSMUSG00000044518	4	114597681	114598657
Cmpk1	ENSMUSG00000028719	4	114631941	114659846
Stil	ENSMUSG00000028718	4	114672723	114715801
Tal1	ENSMUSG00000028717	4	114729031	114744360
Pdzk1ip1	ENSMUSG00000028716	4	114761313	114766504
Cyp4x1	ENSMUSG00000047155	4	114778928	114806886
Cyp4a12a	ENSMUSG00000066071	4	114971651	115005420
Cyp4a12b	ENSMUSG00000078597	4	115084229	115111639
Cyp4a14	ENSMUSG00000028715	4	115158805	115168747
Cyp4a10	ENSMUSG00000066072	4	115190869	115206254
Cyp4a31	ENSMUSG00000028712	4	115236254	115251618
Cyp4a32	ENSMUSG00000063929	4	115273574	115294207
Cyp4b1	ENSMUSG00000028713	4	115297303	115320322
4732418C07Rik	ENSMUSG00000034210	4	115410349	115449932
4930544O15Rik	ENSMUSG00000044556	4	115452439	115453623
Atpaf1	ENSMUSG00000028710	4	115457417	115491433
Mob3c	ENSMUSG00000028709	4	115500697	115508790
Mknk1	ENSMUSG00000028708	4	115511803	115551855
Kncn	ENSMUSG00000073774	4	115557005	115562131
Dmbx1	ENSMUSG00000028707	4	115587149	115612531
Gm17095	ENSMUSG00000091770	4	113672454	113673054
Gm12825	ENSMUSG00000080696	4	113768995	113770006
Gm15741	ENSMUSG00000082825	4	113837728	113838481
Gm12829	ENSMUSG00000085870	4	114353409	114360200
9130410C08Rik	ENSMUSG00000085323	4	114489766	114575464
9130206I24Rik	ENSMUSG00000085399	4	114581862	114594572
Gm12835	ENSMUSG00000086896	4	114806437	114810469
Cyp4a28-ps	ENSMUSG00000081823	4	114811173	114829111
Gm12831	ENSMUSG00000082889	4	114848403	114849448
Gm12834	ENSMUSG00000081138	4	114911359	114914187
Cyp4a29-ps	ENSMUSG00000083138	4	114914689	114927162
Gm12836	ENSMUSG00000083190	4	115016393	115035720
Gm12837	ENSMUSG00000084415	4	115088687	115089059
Cyp4a30b-ps	ENSMUSG00000084346	4	115125209	115143666
Gm12838	ENSMUSG00000080142	4	115126397	115126721
Gm12833	ENSMUSG00000086724	4	115153405	115153881
Gm12832	ENSMUSG00000081006	4	115215990	115217669
Gm12839	ENSMUSG00000083457	4	115254891	115255749
Gm12848	ENSMUSG00000082043	4	115324994	115326085
Gm12849	ENSMUSG00000081172	4	115379856	115380908
Gm12847	ENSMUSG00000085249	4	115491462	115495260
6430628N08Rik	ENSMUSG00000034185	4	115563271	115571833
U1	ENSMUSG00000087923	4	114517590	114517722
AL627182.1	ENSMUSG00000093220	4	115193323	115193575
Y_RNA	ENSMUSG00000065047	4	114660569	114660666
Faah	ENSMUSG00000034171	4	115639750	115690531
9530002B09Rik	ENSMUSG00000023263	4	122366518	122382372
Ppt1	ENSMUSG00000028657	4	122513485	122536418
Cap1	ENSMUSG00000028656	4	122536290	122563299
Mfsd2a	ENSMUSG00000028655	4	122624093	122638431
Mycl1	ENSMUSG00000028654	4	122672895	122679728
Trit1	ENSMUSG00000028653	4	122693840	122732192
Bmp8b	ENSMUSG00000002384	4	122782408	122809342
Gm17244	ENSMUSG00000091865	4	122792642	122793929
Oxct2b	ENSMUSG00000076438	4	122793507	122795192
Ppie	ENSMUSG00000028651	4	122804358	122817194
Hpcal4	ENSMUSG00000046093	4	122860470	122871944
Nt5c1a	ENSMUSG00000054958	4	122878747	122893518
Heyl	ENSMUSG00000032744	4	122910799	122927118
Pabpc4	ENSMUSG00000011257	4	122939594	122976168
Bmp8a	ENSMUSG00000032726	4	122989888	123020495
Oxct2a	ENSMUSG00000076436	4	122999118	123000877
Macf1	ENSMUSG00000028649	4	123026876	123361603
Ndufs5	ENSMUSG00000028648	4	123389953	123395445
Akirin1	ENSMUSG00000023075	4	123411802	123427588
Rhbdl2	ENSMUSG00000043333	4	123465117	123507147
Gm12897	ENSMUSG00000083949	4	121542784	121561691
Gm12893	ENSMUSG00000083867	4	121590014	121590952
Gm12892	ENSMUSG00000083679	4	121756168	121757313
Gm12896	ENSMUSG00000083558	4	121870822	121871047
Gm12894	ENSMUSG00000084406	4	121982891	121983831
Gm12895	ENSMUSG00000083365	4	122132453	122132678
Gm12877	ENSMUSG00000081377	4	122259943	122282137
Gm12874	ENSMUSG00000084196	4	122270227	122271311
Gm12875	ENSMUSG00000080871	4	122317589	122325569
Gm12876	ENSMUSG00000083109	4	122338166	122354521
Gm12872	ENSMUSG00000084082	4	122407527	122411976
Gm12873	ENSMUSG00000083494	4	122455397	122470992
Gm12891	ENSMUSG00000080929	4	122603076	122603315
4933421A08Rik	ENSMUSG00000086443	4	122638552	122640718
Gm12923	ENSMUSG00000086153	4	122770008	122771271
Gm12901	ENSMUSG00000083720	4	122935289	122936147
Gm12900	ENSMUSG00000082634	4	122952143	122952715
Gm12924	ENSMUSG00000081528	4	123112860	123113177
Gm12926	ENSMUSG00000081585	4	123307538	123307946
Gm12925	ENSMUSG00000087307	4	123343124	123348460
Gm12922	ENSMUSG00000081170	4	123386462	123387270
1700121C08Rik	ENSMUSG00000086275	4	123510865	123536756
Gm12904	ENSMUSG00000082310	4	123515347	123516745
SNORA55	ENSMUSG00000065778	4	122970395	122970525
SNORA55	ENSMUSG00000064655	4	122968587	122968717
7SK	ENSMUSG00000089588	4	123167474	123167579
AL713967.1	ENSMUSG00000078065	4	122330722	122330811
4933427I04Rik	ENSMUSG00000073761	4	123536922	123540408
Mycbp	ENSMUSG00000028647	4	123582075	123589512
Rragc	ENSMUSG00000028646	4	123594689	123614240
D130007C19Rik	ENSMUSG00000054304	4	123579372	123580877
Gm12903	ENSMUSG00000080993	4	123579665	123580208
Gm12905	ENSMUSG00000085875	4	123582305	123594512
Gm17408	ENSMUSG00000091927	4	123575876	123582085
3100002H09Rik	ENSMUSG00000051219	4	124287174	124288046
Pou3f1	ENSMUSG00000078236	4	124334050	124337899
Utp11l	ENSMUSG00000028907	4	124355404	124370844
Fhl3	ENSMUSG00000032643	4	124377945	124385855
Sf3a3	ENSMUSG00000028902	4	124392020	124409704
Inpp5b	ENSMUSG00000028894	4	124419094	124478755
Mtf1	ENSMUSG00000028890	4	124479348	124527044
1110065P20Rik	ENSMUSG00000078570	4	124526729	124527974
Yrdc	ENSMUSG00000028889	4	124527923	124532486
Maneal	ENSMUSG00000042763	4	124532483	124539415
Epha10	ENSMUSG00000028876	4	124558143	124595044
Cdca8	ENSMUSG00000028873	4	124595709	124616555
Rspo1	ENSMUSG00000028871	4	124663674	124686343
Gnl2	ENSMUSG00000028869	4	124693829	124732624
Dnali1	ENSMUSG00000042707	4	124732582	124742947
Snip1	ENSMUSG00000050213	4	124743916	124751286
Meaf6	ENSMUSG00000028863	4	124762378	124790482
Zc3h12a	ENSMUSG00000042677	4	124795667	124805084
Grik3	ENSMUSG00000001985	4	125167944	125391417
Gm12902	ENSMUSG00000082515	4	123603477	123603798
Gm12916	ENSMUSG00000086087	4	123970936	123977091
1700021L23Rik	ENSMUSG00000086955	4	123980080	123988704
4933435F18Rik	ENSMUSG00000086978	4	124003551	124009751
1700057H15Rik	ENSMUSG00000084757	4	124091659	124163202
4933407E24Rik	ENSMUSG00000073759	4	124246433	124251888
Pou3f1	ENSMUSG00000090125	4	124334889	124337899
Gm12917	ENSMUSG00000083104	4	124396243	124396881
Gm12915	ENSMUSG00000086589	4	124412974	124428598
1700125G02Rik	ENSMUSG00000085263	4	124568132	124572026
9930104L06Rik	ENSMUSG00000044730	4	124614292	124621900
Gm12930	ENSMUSG00000087011	4	124634891	124664253
Gm12931	ENSMUSG00000080934	4	124696744	124697067
Gm12932	ENSMUSG00000086342	4	124760101	124762191
1700041M05Rik	ENSMUSG00000087010	4	124905841	124919296
Ftl2	ENSMUSG00000082062	4	125181532	125182083
AL626775.1	ENSMUSG00000078049	4	124783500	124783581
AL606907.1	ENSMUSG00000077026	4	124413083	124413192
Mir697	ENSMUSG00000076271	4	124408938	124409046
Mir692-2a	ENSMUSG00000076035	4	125181993	125182101
n-R5s192	ENSMUSG00000084526	4	124498065	124498183
Mir698	ENSMUSG00000076119	4	124421025	124421133
U6	ENSMUSG00000088067	4	124374749	124374851
U6	ENSMUSG00000088933	4	124012821	124012924
Gm10564	ENSMUSG00000073686	4	154416155	154419531
Pex10	ENSMUSG00000029047	4	154441125	154446542
Rer1	ENSMUSG00000029048	4	154448219	154460491
Morn1	ENSMUSG00000029049	4	154460686	154519614
Ski	ENSMUSG00000029050	4	154528184	154596701
2610002J02Rik	ENSMUSG00000073684	4	154623911	154630793
Prkcz	ENSMUSG00000029053	4	154634238	154735470
Gabrd	ENSMUSG00000029054	4	154759089	154772221
Ajap1	ENSMUSG00000039546	4	152747330	152856939
A430005L14Rik	ENSMUSG00000047613	4	153331346	153336034
Dffb	ENSMUSG00000029027	4	153338558	153349235
BC046331	ENSMUSG00000039523	4	153349303	153382841
Lrrc47	ENSMUSG00000029028	4	153385840	153395622
Ccdc27	ENSMUSG00000039492	4	153400748	153416786
Trp73	ENSMUSG00000029026	4	153430358	153514317
Wdr8	ENSMUSG00000029029	4	153516481	153542372
Tprgl	ENSMUSG00000029030	4	153531594	153534775
Megf6	ENSMUSG00000057751	4	153544839	153649822
Arhgef16	ENSMUSG00000029032	4	153652595	153675785
Prdm16	ENSMUSG00000039410	4	153690234	154010982
Actrt2	ENSMUSG00000051276	4	154040537	154041976
Ttc34	ENSMUSG00000046637	4	154230309	154241234
Mmel1	ENSMUSG00000058183	4	154243694	154269637
2810405K02Rik	ENSMUSG00000029059	4	154269613	154273244
Tnfrsf14	ENSMUSG00000042333	4	154296319	154302672
Hes5	ENSMUSG00000048001	4	154335032	154336480
Pank4	ENSMUSG00000029056	4	154338232	154355047
Plch2	ENSMUSG00000029055	4	154357224	154430893
Gm13115	ENSMUSG00000085390	4	153281495	153282775
BC039966	ENSMUSG00000086272	4	153321742	153324612
1190007F08Rik	ENSMUSG00000078350	4	153394697	153400261
Gm13117	ENSMUSG00000080807	4	153417842	153418532
Gm13114	ENSMUSG00000082073	4	153422132	153422237
Gm13116	ENSMUSG00000087071	4	153467588	153472462
Gm13132	ENSMUSG00000081276	4	153594650	153595121
Gm13133	ENSMUSG00000086565	4	153924391	153931754
Gm13134	ENSMUSG00000084987	4	153975306	153978311
Gm13111	ENSMUSG00000085069	4	154011685	154018825
Gm13110	ENSMUSG00000086810	4	154019863	154029427
Gm13113	ENSMUSG00000087012	4	154211568	154213384
Gm13112	ENSMUSG00000087437	4	154238615	154246112
Gm20421	ENSMUSG00000092483	4	154334879	154335787
SNORA17	ENSMUSG00000077519	4	153250493	153250624
SNORA48	ENSMUSG00000088774	4	153508139	153508282
5830444B04Rik	ENSMUSG00000084803	4	154772872	154795813
2010015L04Rik	ENSMUSG00000042233	4	154783299	154822053
C030017K20Rik	ENSMUSG00000078490	4	154825679	154840639
Cdk6	ENSMUSG00000040274	5	3343893	3523218
Gm17590	ENSMUSG00000091644	5	3473071	3473178
Fam133b	ENSMUSG00000058503	5	3543844	3569810
1700109H08Rik	ENSMUSG00000008307	5	3571566	3584356
C030048B08Rik	ENSMUSG00000040302	5	3583978	3596585
Pex1	ENSMUSG00000005907	5	3596066	3637232
Gatad1	ENSMUSG00000007415	5	3632932	3647934
4930511M11Rik	ENSMUSG00000014529	5	3657004	3680325
Ankib1	ENSMUSG00000040351	5	3690000	3803109
Krit1	ENSMUSG00000000600	5	3803165	3847487
4932412H11Rik	ENSMUSG00000040367	5	3845173	3866596
Mterf	ENSMUSG00000040429	5	3890581	3893933
Akap9	ENSMUSG00000040407	5	3928054	4080209
Cyp51	ENSMUSG00000001467	5	4081145	4104746
Gm9897	ENSMUSG00000053178	5	4192360	4197652
Fzd1	ENSMUSG00000044674	5	4753842	4758216
Cdk14	ENSMUSG00000028926	5	4803391	5420312
Gm15750	ENSMUSG00000083921	5	4764834	4765647
SCARNA15	ENSMUSG00000088131	5	4985111	4985238
n-R5s169	ENSMUSG00000065044	5	3561154	3561273
AC022236.1	ENSMUSG00000092698	5	3695964	3696031
AC026231.1	ENSMUSG00000093159	5	4854314	4854423
AC090443.1	ENSMUSG00000093279	5	3652544	3652660
Sema3d	ENSMUSG00000040254	5	12383166	12588943
Gm10481	ENSMUSG00000073212	5	13042253	13043484
Gm10108	ENSMUSG00000062038	5	13121307	13121782
Sema3a	ENSMUSG00000028883	5	13125593	13602565
Speer3	ENSMUSG00000067855	5	13791619	13796820
Gm6647	ENSMUSG00000090991	5	13768662	13771887
Gm6650	ENSMUSG00000090793	5	13811211	13814452
AC134325.1	ENSMUSG00000092645	5	12155104	12155174
AC102477.1	ENSMUSG00000089244	5	13902770	13902874
AC102528.1	ENSMUSG00000077084	5	12940370	12940479
Ppargc1a	ENSMUSG00000029167	5	51845488	51958964
Dhx15	ENSMUSG00000029169	5	52541448	52581758
Sod3	ENSMUSG00000072941	5	52755185	52762644
Ccdc149	ENSMUSG00000045790	5	52765892	52766785
Lgi2	ENSMUSG00000039252	5	52924758	52957542
8030423F21Rik	ENSMUSG00000052295	5	52998789	53010250
Sepsecs	ENSMUSG00000029173	5	53031326	53060968
Pi4k2b	ENSMUSG00000029186	5	53132826	53160583
Zcchc4	ENSMUSG00000029179	5	53166648	53215904
Anapc4	ENSMUSG00000029176	5	53225254	53259036
Slc34a2	ENSMUSG00000029188	5	53429321	53462903
Sel1l3	ENSMUSG00000029189	5	53498323	53604691
1810013D10Rik	ENSMUSG00000061461	5	53658345	53674749
9230114K14Rik	ENSMUSG00000087676	5	52581920	52589223
Gm17182	ENSMUSG00000090642	5	53438926	53440426
n-R5s172	ENSMUSG00000077696	5	53737498	53737611
SNORA42	ENSMUSG00000077757	5	53350590	53350701
U6	ENSMUSG00000088981	5	52734357	52734461
5S_rRNA	ENSMUSG00000088646	5	53809812	53809921
n-R5s171	ENSMUSG00000077316	5	53534399	53534477
Rbpj	ENSMUSG00000039191	5	53947018	54048684
Cckar	ENSMUSG00000029193	5	54089015	54098943
Tbc1d19	ENSMUSG00000039178	5	54200866	54295619
Stim2	ENSMUSG00000039156	5	54389656	54512296
Gm15820	ENSMUSG00000081266	5	54485240	54486280
SNORA17	ENSMUSG00000077507	5	55218454	55218582
U1	ENSMUSG00000065795	5	55694659	55694820
snoMe28S-Cm3227	ENSMUSG00000089535	5	54681415	54681497
Gm15975	ENSMUSG00000083902	5	56015427	56016832
SNORA17	ENSMUSG00000088734	5	57127329	57127458
SNORA17	ENSMUSG00000088751	5	57502063	57502185
SNORA17	ENSMUSG00000077333	5	57519884	57520011
4932441J04Rik	ENSMUSG00000085597	5	57961321	58109158
Gm8121	ENSMUSG00000051116	5	57999616	58000391
Pcdh7	ENSMUSG00000029108	5	58109260	58520590
SNORA17	ENSMUSG00000088796	5	58805467	58805600
U6	ENSMUSG00000064678	5	59606185	59606291
Cbfa2t2-ps1	ENSMUSG00000087034	5	60622721	60623437
U6	ENSMUSG00000088048	5	60892072	60892179
SNORA17	ENSMUSG00000077555	5	61108556	61108678
Limch1	ENSMUSG00000037736	5	67137074	67448398
Phox2b	ENSMUSG00000012520	5	67485636	67490540
Tmem33	ENSMUSG00000037720	5	67651804	67682700
Slc30a9	ENSMUSG00000029221	5	67698194	67749804
Bend4	ENSMUSG00000092060	5	67783386	67819038
Shisa3	ENSMUSG00000050010	5	67999122	68014791
Atp8a1	ENSMUSG00000037685	5	68009379	68238671
Grxcr1	ENSMUSG00000068082	5	68423074	68557637
Gm15478	ENSMUSG00000085363	5	68033640	68038015
Gm15477	ENSMUSG00000087261	5	68238305	68300252
Gm16714	ENSMUSG00000085339	5	67818919	67829229
AC119834.1	ENSMUSG00000080601	5	67444918	67445031
SNORA17	ENSMUSG00000087880	5	68957409	68957535
AC123662.1	ENSMUSG00000093151	5	68023064	68023158
Kctd8	ENSMUSG00000037653	5	69500524	69732948
AC107770.1	ENSMUSG00000093129	5	69732022	69732127
U6	ENSMUSG00000064848	5	69777305	69777411
Gm2199	ENSMUSG00000083829	5	81329775	81330648
U6	ENSMUSG00000065235	5	81322679	81322781
U6	ENSMUSG00000088837	5	80527933	80528039
U4	ENSMUSG00000084435	5	80179406	80179554
7SK	ENSMUSG00000088422	5	80067840	80068134
Lphn3	ENSMUSG00000037605	5	81449163	82254158
Gm16054	ENSMUSG00000087431	5	82220934	82227451
AC104196.1	ENSMUSG00000077914	5	82164943	82165036
Gm17312	ENSMUSG00000074422	5	85680725	85681837
Cenpc1	ENSMUSG00000029253	5	86441068	86494608
Stap1	ENSMUSG00000029254	5	86500771	86533018
Uba6	ENSMUSG00000035898	5	86539745	86601828
Gnrhr	ENSMUSG00000029255	5	86609779	86626926
Tmprss11c	ENSMUSG00000061184	5	86660506	86718333
Tmprss11d	ENSMUSG00000061259	5	86731242	86802445
Tmprss11a	ENSMUSG00000072845	5	86839435	86898015
Tmprss11g	ENSMUSG00000079451	5	86914901	86947625
Tmprss11f	ENSMUSG00000048764	5	86950923	87061449
Tmprss11bnl	ENSMUSG00000035861	5	87086656	87105387
Tmprss11e	ENSMUSG00000054537	5	87134211	87174840
Ythdc1	ENSMUSG00000035851	5	87233246	87265684
Ugt2b34	ENSMUSG00000029260	5	87318792	87335962
Ugt2b1	ENSMUSG00000035836	5	87345663	87355555
Ugt2b35	ENSMUSG00000035811	5	87429885	87442299
Gm16579	ENSMUSG00000089851	5	87157924	87188761
U6	ENSMUSG00000065846	5	86665880	86665986
U1	ENSMUSG00000064555	5	86258652	86258812
U1	ENSMUSG00000064859	5	86508791	86508960
U6	ENSMUSG00000075732	5	87345241	87345347
U6	ENSMUSG00000075983	5	87357928	87358033
Ugt2b36	ENSMUSG00000070704	5	87494952	87521580
Ugt2b5	ENSMUSG00000054630	5	87553981	87569365
Ugt2b37	ENSMUSG00000057425	5	87669518	87683829
Ugt2a3	ENSMUSG00000035780	5	87753997	87766220
Ugt2b38	ENSMUSG00000061906	5	87838967	87853228
Ugt2a1	ENSMUSG00000029268	5	87888515	87919896
Sult1b1	ENSMUSG00000029269	5	87942364	87967220
Sult1d1	ENSMUSG00000029273	5	87983670	87998052
Sult1e1	ENSMUSG00000029272	5	88004993	88020636
Csn1s1	ENSMUSG00000070702	5	88095249	88111598
Csn2	ENSMUSG00000063157	5	88121647	88128446
SNORA17	ENSMUSG00000088899	5	88162553	88162675
Csn1s2a	ENSMUSG00000061937	5	88203592	88217822
SNORA17	ENSMUSG00000088770	5	88193704	88193826
Csn1s2b	ENSMUSG00000061388	5	88237107	88253451
4930432K09Rik	ENSMUSG00000002240	5	88254711	88275411
Gm7337	ENSMUSG00000067156	5	88279460	88280737
Odam	ENSMUSG00000009580	5	88314054	88323199
Csn3	ENSMUSG00000001622	5	88354604	88361690
BC051076	ENSMUSG00000055961	5	88392510	88395374
2310003L06Rik	ENSMUSG00000007457	5	88398484	88401895
4931407G18Rik	ENSMUSG00000007907	5	88408476	88410568
Smr3a	ENSMUSG00000029280	5	88431550	88437559
Smr2	ENSMUSG00000029281	5	88515581	88538078
Gm11116	ENSMUSG00000079439	5	88539592	88540555
Gm11115	ENSMUSG00000079438	5	88583048	88583124
Gm7714	ENSMUSG00000090302	5	88697944	88711860
Prol1	ENSMUSG00000064156	5	88746337	88757842
Amtn	ENSMUSG00000029282	5	88805133	88814941
Tbx3	ENSMUSG00000018604	5	120120678	120134733
Tbx5	ENSMUSG00000018263	5	120284672	120335227
Rbm19	ENSMUSG00000029594	5	120566519	120648394
Lhx5	ENSMUSG00000029595	5	120881779	120891464
Sdsl	ENSMUSG00000029596	5	120908195	120922819
Sds	ENSMUSG00000029597	5	120926540	120933941
Plbd2	ENSMUSG00000029598	5	120933291	120953634
Slc24a6	ENSMUSG00000032754	5	120961177	120984033
Tpcn1	ENSMUSG00000032741	5	120984169	121038622
Iqcd	ENSMUSG00000029601	5	121039025	121057123
1110008J03Rik	ENSMUSG00000029600	5	121044314	121062598
Ddx54	ENSMUSG00000029599	5	121063128	121078599
Rasal1	ENSMUSG00000029602	5	121098821	121129606
Dtx1	ENSMUSG00000029603	5	121130211	121161936
Oas2	ENSMUSG00000032690	5	121180342	121199862
Oas3	ENSMUSG00000032661	5	121203107	121227670
Oas1e	ENSMUSG00000066867	5	121236321	121245539
Oas1c	ENSMUSG00000001166	5	121250102	121262523
Oas1b	ENSMUSG00000029605	5	121262644	121274186
Oas1f	ENSMUSG00000053765	5	121297376	121307995
Oas1h	ENSMUSG00000001168	5	121311430	121323521
Oas1g	ENSMUSG00000066861	5	121326151	121337622
Oas1a	ENSMUSG00000052776	5	121346265	121357536
Oas1d	ENSMUSG00000032623	5	121364354	121371661
Rph3a	ENSMUSG00000029608	5	121390511	121459527
Ptpn11	ENSMUSG00000043733	5	121580542	121641406
Gm2301	ENSMUSG00000087516	5	120061272	120121374
Gm16063	ENSMUSG00000085708	5	120075951	120084473
Gm16064	ENSMUSG00000085345	5	120096143	120109271
Gm16065	ENSMUSG00000086847	5	120135104	120141227
Gm15690	ENSMUSG00000086165	5	120929851	120930912
Gm15749	ENSMUSG00000089830	5	121098049	121098758
Gm10390	ENSMUSG00000072671	5	120571112	120589272
n-R5s176	ENSMUSG00000064617	5	120514344	120514452
AC015535.1	ENSMUSG00000092939	5	121302180	121302305
n-R5s175	ENSMUSG00000084548	5	119747254	119747370
AC111115.1	ENSMUSG00000080412	5	120737735	120737856
Rpl6	ENSMUSG00000029614	5	121654490	121659250
Gm15800	ENSMUSG00000042744	5	121670228	121818586
Trafd1	ENSMUSG00000042726	5	121821734	121835641
Naa25	ENSMUSG00000042719	5	121847945	121894387
Erp29	ENSMUSG00000029616	5	121878599	121902515
Tmem116	ENSMUSG00000029452	5	121901902	121974192
Adam1b	ENSMUSG00000062438	5	121950106	121952989
Adam1a	ENSMUSG00000072647	5	121968613	121971704
Mapkapk5	ENSMUSG00000029454	5	121968622	121995914
Aldh2	ENSMUSG00000029455	5	122016036	122043833
Acad12	ENSMUSG00000042647	5	122048293	122068947
Acad10	ENSMUSG00000029456	5	122071035	122110523
Brap	ENSMUSG00000029458	5	122110572	122137257
Atxn2	ENSMUSG00000042605	5	122161346	122266502
Sh2b3	ENSMUSG00000042594	5	122265497	122286868
Fam109a	ENSMUSG00000044134	5	122299037	122304608
Cux2	ENSMUSG00000042589	5	122307972	122500111
Myl2	ENSMUSG00000013936	5	122550960	122563481
Ccdc63	ENSMUSG00000043036	5	122558049	122588966
Ppp1cc	ENSMUSG00000004455	5	122608287	122625282
Hvcn1	ENSMUSG00000064267	5	122656813	122692306
Tctn1	ENSMUSG00000038593	5	122691296	122714469
Pptc7	ENSMUSG00000038582	5	122734374	122774290
Rad9b	ENSMUSG00000038569	5	122773232	122804242
Vps29	ENSMUSG00000029462	5	122804378	122814993
1500011H22Rik	ENSMUSG00000029463	5	122814589	122822373
Gpn3	ENSMUSG00000029464	5	122821885	122832911
Arpc3	ENSMUSG00000029465	5	122841887	122856188
Anapc7	ENSMUSG00000029466	5	122871702	122894921
Atp2a2	ENSMUSG00000029467	5	122903531	122952183
Ift81	ENSMUSG00000029469	5	123000213	123064527
P2rx7	ENSMUSG00000029468	5	123093920	123141441
Gm10064	ENSMUSG00000059352	5	123147205	123147612
P2rx4	ENSMUSG00000029470	5	123157593	123179747
Camkk2	ENSMUSG00000029471	5	123183213	123229391
Anapc5	ENSMUSG00000029472	5	123237478	123271348
Rnf34	ENSMUSG00000029474	5	123300197	123318954
Kdm2b	ENSMUSG00000029475	5	123320677	123465089
Orai1	ENSMUSG00000049686	5	123465083	123480459
Morn3	ENSMUSG00000029477	5	123485778	123497025
Tmem120b	ENSMUSG00000054434	5	123518424	123567758
Gm15546	ENSMUSG00000082760	5	121921572	121922397
Gm15547	ENSMUSG00000082265	5	121980572	121980904
Gm16552	ENSMUSG00000089729	5	122167675	122177412
Cux2	ENSMUSG00000072641	5	122308562	122308977
Gm15637	ENSMUSG00000087386	5	122498391	122505663
Gm15481	ENSMUSG00000082645	5	122703011	122703549
Gm15842	ENSMUSG00000083909	5	122752431	122753048
Gm15846	ENSMUSG00000079906	5	122888605	122888924
A930024E05Rik	ENSMUSG00000056735	5	123439363	123448354
Gm6444	ENSMUSG00000080836	5	123516251	123516708
Gm17627	ENSMUSG00000066418	5	123497382	123680880
U6	ENSMUSG00000088583	5	122956798	122956898
U1	ENSMUSG00000077347	5	121806853	121807010
SNORA42	ENSMUSG00000064841	5	121655019	121655152
Rhof	ENSMUSG00000029449	5	123553053	123582701
Setd1b	ENSMUSG00000038384	5	123592202	123617444
Hpd	ENSMUSG00000029445	5	123621816	123632734
AI480526	ENSMUSG00000090086	5	123583732	123591675
Gbas	ENSMUSG00000029432	5	130230938	130264203
Psph	ENSMUSG00000029446	5	130271434	130293129
Cct6a	ENSMUSG00000029447	5	130293315	130321696
Sumf2	ENSMUSG00000025538	5	130322866	130339928
Phkg1	ENSMUSG00000025537	5	130339297	130374419
Chchd2	ENSMUSG00000070493	5	130357027	130363340
2410018M08Rik	ENSMUSG00000034173	5	130371593	130379493
4930579G22Rik	ENSMUSG00000025535	5	130384410	130387150
Vkorc1l1	ENSMUSG00000066735	5	130417979	130460615
Gusb	ENSMUSG00000025534	5	130464881	130478919
Asl	ENSMUSG00000025533	5	130487128	130501002
Crcp	ENSMUSG00000025532	5	130505160	130536659
Tpst1	ENSMUSG00000034118	5	130549196	130611599
Kctd7	ENSMUSG00000034110	5	130620731	130631676
Rabgef1	ENSMUSG00000025340	5	130647668	130690212
0610007L01Rik	ENSMUSG00000053094	5	130695614	130719635
Sbds	ENSMUSG00000025337	5	130721601	130731400
Tyw1	ENSMUSG00000056310	5	130731489	130817433
Caln1	ENSMUSG00000060371	5	130845346	131316515
A330070K13Rik	ENSMUSG00000052014	5	130854648	130860501
Wbscr17	ENSMUSG00000034040	5	131347952	131783948
Auts2	ENSMUSG00000029673	5	131913205	133019214
Gm15920	ENSMUSG00000080893	5	130664265	130664666
Gm15921	ENSMUSG00000083146	5	130683950	130684432
SNORA22	ENSMUSG00000065304	5	130295415	130295549
Snora15	ENSMUSG00000093413	5	130300422	130300552
U6	ENSMUSG00000088972	5	131258567	131258674
Zp3	ENSMUSG00000004948	5	136455969	136464494
Dtx2	ENSMUSG00000004947	5	136470670	136508742
Upk3b	ENSMUSG00000042985	5	136514366	136521173
2310043J07Rik	ENSMUSG00000006143	5	136530362	136540196
Rasa4	ENSMUSG00000004952	5	136559786	136587730
Polr2j	ENSMUSG00000039771	5	136592501	136598817
Lrwd1	ENSMUSG00000029703	5	136598642	136611944
Alkbh4	ENSMUSG00000039754	5	136612016	136617485
Orai2	ENSMUSG00000039747	5	136623334	136646526
Prkrip1	ENSMUSG00000039737	5	136653997	136674833
Sh2b2	ENSMUSG00000005057	5	136694019	136720773
Cux1	ENSMUSG00000029705	5	136724005	137043360
4731417B20Rik	ENSMUSG00000046548	5	137089572	137091198
Myl10	ENSMUSG00000005474	5	137169016	137176964
Emid2	ENSMUSG00000004415	5	137217629	137359079
Rabl5	ENSMUSG00000007987	5	137384020	137389114
Fis1	ENSMUSG00000019054	5	137429145	137442104
Cldn15	ENSMUSG00000001739	5	137442486	137451728
Znhit1	ENSMUSG00000059518	5	137458034	137463891
Plod3	ENSMUSG00000004846	5	137462889	137472518
Vgf	ENSMUSG00000037428	5	137506165	137509221
Ap1s1	ENSMUSG00000004849	5	137510863	137522005
Serpine1	ENSMUSG00000037411	5	137537374	137548142
Trim56	ENSMUSG00000043279	5	137581514	137592079
Muc3	ENSMUSG00000037390	5	137610794	137625994
Gm3054	ENSMUSG00000079174	5	137632985	137634856
Ache	ENSMUSG00000023328	5	137728747	137735694
Ufsp1	ENSMUSG00000051502	5	137735897	137736892
Srrt	ENSMUSG00000037364	5	137736932	137748902
Trip6	ENSMUSG00000023348	5	137751127	137755632
Slc12a9	ENSMUSG00000037344	5	137755786	137774825
Ephb4	ENSMUSG00000029710	5	137791337	137819897
Zan	ENSMUSG00000079173	5	137819865	137918292
Epo	ENSMUSG00000029711	5	137923487	137974470
Pop7	ENSMUSG00000029715	5	137942666	137943746
Gigyf1	ENSMUSG00000029714	5	137960108	137969162
Gnb2	ENSMUSG00000029713	5	137969355	137974738
Actl6b	ENSMUSG00000029712	5	137994745	138010810
Tfr2	ENSMUSG00000029716	5	138011079	138028709
Mospd3	ENSMUSG00000037221	5	138037873	138042286
Pcolce	ENSMUSG00000029718	5	138046331	138055012
Fbxo24	ENSMUSG00000089984	5	138053731	138070230
Lrch4	ENSMUSG00000093445	5	138070349	138082327
Lrch4	ENSMUSG00000029720	5	138070403	138084127
Sap25	ENSMUSG00000079165	5	138082562	138084130
Irs3	ENSMUSG00000047182	5	138084260	138086942
Agfg2	ENSMUSG00000029722	5	138091711	138125954
6430598A04Rik	ENSMUSG00000045348	5	138172111	138182835
Tsc22d4	ENSMUSG00000029723	5	138186958	138209678
Ppp1r35	ENSMUSG00000029725	5	138220077	138221338
Mepce	ENSMUSG00000029726	5	138223134	138227943
Zcwpw1	ENSMUSG00000037108	5	138229026	138263849
Pilra	ENSMUSG00000046245	5	138263180	138277506
Pilrb1	ENSMUSG00000066684	5	138293375	138299277
Pilrb2	ENSMUSG00000066682	5	138307057	138312986
Cyp3a13	ENSMUSG00000029727	5	138334160	138362847
Gjc3	ENSMUSG00000056966	5	138395037	138404187
Azgp1	ENSMUSG00000037053	5	138422749	138431461
Gm4963	ENSMUSG00000063739	5	138434275	138434652
Gm7284	ENSMUSG00000087244	5	137473256	137475164
Gm15701	ENSMUSG00000086656	5	136578474	136580306
Gm16599	ENSMUSG00000086220	5	136750866	136893764
A430110C17Rik	ENSMUSG00000093578	5	136821754	136826101
Gm20485	ENSMUSG00000092402	5	137339507	137345592
Gm17112	ENSMUSG00000090873	5	137973651	137981946
Gm16089	ENSMUSG00000081228	5	138056855	138057190
Gm15498	ENSMUSG00000079163	5	138126382	138131979
Gm15753	ENSMUSG00000082088	5	138161582	138162968
Gm15502	ENSMUSG00000083813	5	138337980	138338187
4933404O12Rik	ENSMUSG00000085062	5	137395016	137412982
Mir702	ENSMUSG00000076240	5	137467303	137467411
U12	ENSMUSG00000088188	5	136572130	136572301
Smok3a	ENSMUSG00000075599	5	138462504	138475893
Smok3b	ENSMUSG00000075598	5	138478452	138491863
Zkscan1	ENSMUSG00000029729	5	138526312	138549050
Smok3c	ENSMUSG00000079156	5	138494423	138507767
Zscan21	ENSMUSG00000037017	5	138558131	138575493
Gm2566	ENSMUSG00000082959	5	150305082	150305622
Gm5566	ENSMUSG00000080002	5	150463340	150463798
5730422E09Rik	ENSMUSG00000086085	5	149931141	149995639
Flt1	ENSMUSG00000029648	5	148373180	148537587
Pomp	ENSMUSG00000029649	5	148672204	148687354
Slc46a3	ENSMUSG00000029650	5	148690013	148706391
Mtus2	ENSMUSG00000029651	5	148768896	149127641
Slc7a1	ENSMUSG00000041313	5	149138986	149211480
Ubl3	ENSMUSG00000001687	5	149316207	149364365
Katnal1	ENSMUSG00000041298	5	149685908	149806799
8430423G03Rik	ENSMUSG00000079069	5	149761826	149763234
Gm15409	ENSMUSG00000087272	5	149770854	149773288
Hmgb1	ENSMUSG00000066551	5	149858278	149865089
Uspl1	ENSMUSG00000041264	5	149995926	150027010
Alox5ap	ENSMUSG00000060063	5	150076634	150099621
6330406I15Rik	ENSMUSG00000029659	5	150171051	150234298
4930588N13Rik	ENSMUSG00000029660	5	150242281	150273195
Wdr95	ENSMUSG00000029658	5	150331254	150414470
Hsph1	ENSMUSG00000029657	5	150416862	150438951
B3galtl	ENSMUSG00000051950	5	150480805	150565174
Gm15721	ENSMUSG00000085565	5	148761458	148768742
Gm10167	ENSMUSG00000066554	5	148994475	148995953
2210417A02Rik	ENSMUSG00000086494	5	149553416	149554715
4930505K14Rik	ENSMUSG00000085740	5	149589539	149594656
Gm15407	ENSMUSG00000087647	5	149632343	149640984
Gm15410	ENSMUSG00000085639	5	149758168	149760442
Gm15406	ENSMUSG00000085237	5	149760473	149808142
1810059H22Rik	ENSMUSG00000085455	5	149765324	149781698
Gm15411	ENSMUSG00000085971	5	149807227	149827389
Gm15408	ENSMUSG00000086610	5	149818538	149824352
Gm8615	ENSMUSG00000024437	5	149967022	149967657
BC028471	ENSMUSG00000075529	5	150170211	150196171
Gm20488	ENSMUSG00000092327	5	150171051	150233257
Gm15997	ENSMUSG00000086744	5	150291631	150340605
n-R5s180	ENSMUSG00000064704	5	150092694	150092799
AC122546.1	ENSMUSG00000092674	5	150059530	150059820
n-R5s179	ENSMUSG00000084513	5	149564899	149565016
AC122546.2	ENSMUSG00000092764	5	149957300	149957397
Gm17725	ENSMUSG00000091555	6	51329709	51342776
Gm15055	ENSMUSG00000085412	6	52052948	52062531
Gm8078	ENSMUSG00000081979	6	52068241	52068890
Gm15052	ENSMUSG00000082781	6	52081777	52082045
Gm15051	ENSMUSG00000087658	6	52106901	52112118
5730446D14Rik	ENSMUSG00000056445	6	52115673	52119563
Gm15050	ENSMUSG00000087626	6	52122880	52124058
2700086A05Rik	ENSMUSG00000085696	6	52125216	52165075
9930038K12Rik	ENSMUSG00000092475	6	52178246	52180531
9930038K12Rik	ENSMUSG00000056583	6	52180079	52180529
Hoxa11as	ENSMUSG00000086427	6	52194392	52199798
Gm15053	ENSMUSG00000055408	6	52212769	52217597
5730457N03Rik	ENSMUSG00000086126	6	52258383	52264826
Gm8129	ENSMUSG00000059159	6	52296724	52296939
Gm15054	ENSMUSG00000084282	6	52307538	52307818
Hnrnpa2b1	ENSMUSG00000004980	6	51410433	51419893
Cbx3	ENSMUSG00000029836	6	51420359	51433703
Snx10	ENSMUSG00000038301	6	51473900	51540678
Skap2	ENSMUSG00000059182	6	51809165	51962548
Hoxa1	ENSMUSG00000029844	6	52105366	52108316
Hoxa2	ENSMUSG00000014704	6	52112350	52115412
RP23-103L13.8	ENSMUSG00000093412	6	52113358	52163338
Hoxa3	ENSMUSG00000079560	6	52118509	52163335
5730596B20Rik	ENSMUSG00000056468	6	52127497	52130850
Hoxa4	ENSMUSG00000000942	6	52139670	52141752
Hoxa3	ENSMUSG00000059723	6	52149150	52163335
Hoxa5	ENSMUSG00000038253	6	52151753	52154586
Hoxa6	ENSMUSG00000043219	6	52155430	52161355
Hoxa7	ENSMUSG00000038236	6	52164490	52171853
Hoxa9	ENSMUSG00000038227	6	52173099	52181088
Hoxa10	ENSMUSG00000000938	6	52181196	52190853
Hoxa11	ENSMUSG00000038210	6	52192107	52196213
Hoxa13	ENSMUSG00000038203	6	52207693	52210874
Evx1	ENSMUSG00000005503	6	52263492	52268372
Hibadh	ENSMUSG00000029776	6	52496222	52590383
Nfe2l3	ENSMUSG00000029832	6	51382669	51408767
G930045G22Rik	ENSMUSG00000073072	6	50796523	50828078
Tax1bp1	ENSMUSG00000004535	6	52663723	52716774
Jazf1	ENSMUSG00000063568	6	52718791	53018625
Mir148a	ENSMUSG00000065505	6	51219811	51219909
SNORA32	ENSMUSG00000064792	6	52589228	52589349
AC153877.1	ENSMUSG00000092936	6	51571631	51571707
Mir196b	ENSMUSG00000065443	6	52180080	52180164
Gm15572	ENSMUSG00000081872	6	52793103	52793695
SCARNA20	ENSMUSG00000089209	6	52960388	52960526
A930038C07Rik	ENSMUSG00000049001	6	65621584	65656924
Prdm5	ENSMUSG00000029913	6	65728982	65886367
4930544G11Rik	ENSMUSG00000036463	6	65902565	65904006
Gm15534	ENSMUSG00000086176	6	64940949	64941502
Gm17147	ENSMUSG00000090939	6	65078565	65078996
Gm15490	ENSMUSG00000082115	6	65707930	65708315
Gm16838	ENSMUSG00000085689	6	65718538	65729243
Gm20445	ENSMUSG00000092394	6	65832773	65833337
Grid2	ENSMUSG00000071424	6	63205870	64618276
Atoh1	ENSMUSG00000073043	6	64679140	64681227
Smarcad1	ENSMUSG00000029920	6	64992661	65066044
Hpgds	ENSMUSG00000029919	6	65067287	65094902
C130060K24Rik	ENSMUSG00000029917	6	65331099	65408144
Tnip3	ENSMUSG00000044162	6	65540392	65584034
U6	ENSMUSG00000088832	6	65814165	65814270
U6	ENSMUSG00000064391	6	65939634	65939733
U6	ENSMUSG00000064775	6	64363642	64363744
Mad2l1	ENSMUSG00000029910	6	66485384	66491027
Vmn1r32	ENSMUSG00000062905	6	66502177	66509702
Vmn1r34	ENSMUSG00000091012	6	66586817	66587746
Vmn1r33	ENSMUSG00000059375	6	66561442	66566056
Vmn1r35	ENSMUSG00000060699	6	66628788	66629678
Vmn1r36	ENSMUSG00000093764	6	66665896	66666924
Vmn1r37	ENSMUSG00000057612	6	66681386	66682294
Vmn1r-ps24	ENSMUSG00000093504	6	66703374	66704273
Vmn1r38	ENSMUSG00000093632	6	66726138	66727173
Gm15644	ENSMUSG00000084154	6	66962479	66962865
E230016M11Rik	ENSMUSG00000087231	6	66986593	67030648
A430010J10Rik	ENSMUSG00000048665	6	67115197	67115610
Gm8566	ENSMUSG00000047905	6	67155505	67156161
A430010J10Rik	ENSMUSG00000091724	6	67065667	67118420
Vmn1r39	ENSMUSG00000093755	6	66754206	66755437
4930597O21Rik	ENSMUSG00000053442	6	66844648	66846515
Gng12	ENSMUSG00000036402	6	66846391	66971344
Gadd45a	ENSMUSG00000036390	6	66985090	66987451
Serbp1	ENSMUSG00000036371	6	67216973	67239296
Il12rb2	ENSMUSG00000018341	6	67241312	67326182
Il23r	ENSMUSG00000049093	6	67372926	67441849
Tacstd2	ENSMUSG00000051397	6	67484053	67485816
Igkv2-137	ENSMUSG00000076501	6	67505630	67506210
Igkv1-135	ENSMUSG00000076502	6	67559739	67560502
Igkv17-134	ENSMUSG00000091268	6	67670723	67671219
Igkv1-133	ENSMUSG00000076503	6	67674908	67675655
U1	ENSMUSG00000064987	6	66977037	66977170
Gm16748	ENSMUSG00000085308	6	99675765	99682547
Foxp1	ENSMUSG00000030067	6	98875332	99472715
Eif4e3	ENSMUSG00000030068	6	99207478	99616791
Eif4e3	ENSMUSG00000093661	6	99575129	99616765
Gpr27	ENSMUSG00000072875	6	99642673	99643812
Prok2	ENSMUSG00000030069	6	99661293	99676386
Rybp	ENSMUSG00000072872	6	100178560	100237435
Shq1	ENSMUSG00000035378	6	100523075	100621151
Gxylt2	ENSMUSG00000030074	6	100654728	100755075
RP23-333F8.1	ENSMUSG00000093559	6	99334601	99338493
Tpt1-ps3	ENSMUSG00000084319	6	99827741	99828427
Gm6565	ENSMUSG00000079224	6	100554677	100555114
Gm15576	ENSMUSG00000084157	6	100676228	100676754
7SK	ENSMUSG00000087946	6	99843220	99843541
7SK	ENSMUSG00000084547	6	99525885	99526131
SNORA17	ENSMUSG00000087929	6	100444675	100444808
AC152987.1	ENSMUSG00000088699	6	99434585	99434696
Gm17519	ENSMUSG00000091352	6	101148563	101160263
Ppp4r2	ENSMUSG00000052144	6	100783632	100818711
Pdzrn3	ENSMUSG00000035357	6	101099601	101327891
Atp2b2	ENSMUSG00000030302	6	113695663	113992607
Slc6a11	ENSMUSG00000030307	6	114081235	114199880
Slc6a1	ENSMUSG00000030310	6	114232629	114267516
Hrh1	ENSMUSG00000053004	6	114347930	114433290
Atg7	ENSMUSG00000030314	6	114593149	114810431
Vgll4	ENSMUSG00000030315	6	114810646	114920012
1500001M20Rik	ENSMUSG00000030316	6	114954399	114987894
Syn2	ENSMUSG00000009394	6	115084920	115232644
Gm17482	ENSMUSG00000092004	6	115177361	115209312
Timp4	ENSMUSG00000030317	6	115195634	115201867
Pparg	ENSMUSG00000000440	6	115311239	115440419
Tsen2	ENSMUSG00000042389	6	115494682	115528368
2510049J12Rik	ENSMUSG00000068011	6	115533562	115542594
Mkrn2	ENSMUSG00000000439	6	115551949	115568688
Raf1	ENSMUSG00000000441	6	115568085	115626653
Tmem40	ENSMUSG00000059900	6	115679149	115712484
Gm17733	ENSMUSG00000091748	6	115077620	115084790
Gm15082	ENSMUSG00000087053	6	113887733	113890200
Gm15083	ENSMUSG00000087083	6	113954783	114002102
Gm14335	ENSMUSG00000081805	6	115588268	115589077
D830050J10Rik	ENSMUSG00000055396	6	115626161	115626657
U3	ENSMUSG00000089295	6	114953065	114953150
AC147047.1	ENSMUSG00000089134	6	115049572	115049666
SNORA17	ENSMUSG00000088358	6	115673713	115673850
Cand2	ENSMUSG00000030319	6	115724556	115754911
Rpl32	ENSMUSG00000057841	6	115755523	115758765
Mbd4	ENSMUSG00000030322	6	115790715	115803389
Ift122	ENSMUSG00000030323	6	115803488	115876717
Rho	ENSMUSG00000030324	6	115881945	115888847
H1foo	ENSMUSG00000042279	6	115894956	115900254
Plxnd1	ENSMUSG00000030123	6	115904829	115945023
Tmcc1	ENSMUSG00000030126	6	115968636	116143504
D6Wsu116e	ENSMUSG00000024104	6	116158051	116212686
Anubl1	ENSMUSG00000042213	6	116214240	116280316
March8	ENSMUSG00000025702	6	116288042	116359558
Alox5	ENSMUSG00000025701	6	116360095	116411196
Olfr211	ENSMUSG00000053391	6	116443629	116444558
Olfr212	ENSMUSG00000053251	6	116456534	116467983
Olfr213	ENSMUSG00000081649	6	116490473	116491456
Olfr214	ENSMUSG00000051046	6	116506423	116507430
Olfr215	ENSMUSG00000050654	6	116531956	116533049
Zfp422	ENSMUSG00000059878	6	116574034	116579017
Rassf4	ENSMUSG00000042129	6	116583026	116623854
8430408G22Rik	ENSMUSG00000048489	6	116600702	116602865
Tmem72	ENSMUSG00000048108	6	116642648	116666931
Cxcl12	ENSMUSG00000061353	6	117118553	117131385
Rpl28-ps4	ENSMUSG00000090549	6	117163674	117164066
BC060267	ENSMUSG00000030321	6	115760747	115788430
Gm20404	ENSMUSG00000092625	6	116057669	116077511
Gm8203	ENSMUSG00000060214	6	116123652	116124512
Gm8213	ENSMUSG00000082474	6	116145436	116145876
Gm5580	ENSMUSG00000060393	6	116501160	116502622
AC142099.1	ENSMUSG00000093023	6	115856098	115856361
SNORA17	ENSMUSG00000088374	6	116715547	116715670
Snora7a	ENSMUSG00000064563	6	115757993	115758132
U7	ENSMUSG00000087849	6	116561593	116561654
SNORA17	ENSMUSG00000077758	6	116321957	116322086
Zfp239	ENSMUSG00000042097	6	117812118	117822784
Hnrnpf	ENSMUSG00000042079	6	117850358	117875639
4933440N22Rik	ENSMUSG00000042087	6	117857128	117857778
Fxyd4	ENSMUSG00000004988	6	117883747	117887353
Rasgef1a	ENSMUSG00000030134	6	117961392	118041564
Csgalnact2	ENSMUSG00000042042	6	118057470	118089158
Ret	ENSMUSG00000030110	6	118101766	118147762
Bms1	ENSMUSG00000030138	6	118333401	118369435
Zfp248	ENSMUSG00000030145	6	118377337	118405546
Zfp9	ENSMUSG00000072623	6	118411968	118429338
Ankrd26	ENSMUSG00000007827	6	118452582	118512274
Cacna1c	ENSMUSG00000051331	6	118542314	119146249
Dcp1b	ENSMUSG00000041477	6	119125270	119171632
Cacna2d4	ENSMUSG00000041460	6	119186544	119302425
Lrtm2	ENSMUSG00000055003	6	119265151	119280784
Adipor2	ENSMUSG00000030168	6	119303168	119367501
Wnt5b	ENSMUSG00000030170	6	119382549	119494336
Fbxl14	ENSMUSG00000030019	6	119429686	119433904
Erc1	ENSMUSG00000030172	6	119520822	119798168
3110021A11Rik	ENSMUSG00000050604	6	119798211	119799031
Gm4875	ENSMUSG00000082791	6	117947225	117948010
U6	ENSMUSG00000089115	6	118784918	118785018
AC153918.1	ENSMUSG00000093105	6	117885487	117885611
AC140192.1	ENSMUSG00000093079	6	118379188	118379270
SNORA17	ENSMUSG00000077787	6	118061932	118062063
Rad52	ENSMUSG00000030166	6	119852716	119872846
Wnk1	ENSMUSG00000045962	6	119873987	119988690
4930540M05Rik	ENSMUSG00000086280	6	119846177	119852671
Gm15532	ENSMUSG00000080719	6	119842938	119843821
Wnk1	ENSMUSG00000089896	6	119912385	119913686
Ano2	ENSMUSG00000038115	6	125640437	125990144
[truncated: 4,540 more rows]

## Sheet: wk14IgG1to3-FHA
Gene Name	Ensembl Gene ID	Chromosome	Start	End
Mreg	ENSMUSG00000039395	1	72205807	72258881
Pecr	ENSMUSG00000026189	1	72305741	72330888
Tmem169	ENSMUSG00000026188	1	72330943	72349678
Xrcc5	ENSMUSG00000026187	1	72353995	72441526
March4	ENSMUSG00000039372	1	72473686	72583504
Smarcal1	ENSMUSG00000039354	1	72629825	72679708
Ankar	ENSMUSG00000039342	1	72689554	72747138
Rpl37a	ENSMUSG00000046330	1	72757834	72760383
Igfbp2	ENSMUSG00000039323	1	72871077	72899048
Igfbp5	ENSMUSG00000026185	1	72904506	72921458
Tnp1	ENSMUSG00000026182	1	73061657	73062473
Tns1	ENSMUSG00000055322	1	73956805	74171021
Gm15843	ENSMUSG00000085812	1	72506073	72506601
D230017M19Rik	ENSMUSG00000085769	1	72283039	72321443
AC120136.3	ENSMUSG00000093333	1	72301582	72301772
AC120136.2	ENSMUSG00000093247	1	72283520	72283710
AC120136.1	ENSMUSG00000093111	1	72290787	72290977
5S_rRNA	ENSMUSG00000088666	1	73810284	73810409
U2	ENSMUSG00000075752	1	72272814	72273004
Rufy4	ENSMUSG00000061815	1	74172115	74194797
Cxcr2	ENSMUSG00000026180	1	74200563	74207812
Cxcr1	ENSMUSG00000048480	1	74238359	74241205
Mir1928	ENSMUSG00000087820	1	74253128	74253194
U6	ENSMUSG00000075767	1	74259387	74259493
Arpc2	ENSMUSG00000006304	1	74283071	74314783
Gpbar1	ENSMUSG00000064272	1	74325124	74326198
Aamp	ENSMUSG00000006299	1	74326421	74331254
Pnkd	ENSMUSG00000026179	1	74331504	74400268
Tmbim1	ENSMUSG00000006301	1	74334821	74352196
Gm216	ENSMUSG00000073650	1	74408682	74415895
Slc11a1	ENSMUSG00000026177	1	74421777	74432636
Pign	ENSMUSG00000056536	1	107417716	107555585
2310035C23Rik	ENSMUSG00000026319	1	107560438	107651708
Tnfrsf11a	ENSMUSG00000026321	1	107677300	107744558
Zcchc2	ENSMUSG00000038866	1	107886983	107930651
Phlpp1	ENSMUSG00000044340	1	108068329	108290827
Bcl2	ENSMUSG00000057329	1	108434755	108610851
Kdsr	ENSMUSG00000009905	1	108616987	108656319
Vps4b	ENSMUSG00000009907	1	108660648	108693305
Serpinb5	ENSMUSG00000067006	1	108757750	108779925
Serpinb12	ENSMUSG00000059956	1	108831026	108853657
Serpinb13	ENSMUSG00000048775	1	108877561	108897772
Serpinb3a	ENSMUSG00000044594	1	108942164	108948914
Serpinb3d	ENSMUSG00000058017	1	108974744	108980083
Serpinb3b	ENSMUSG00000073602	1	109050517	109174938
Serpinb3c	ENSMUSG00000073601	1	109167778	109174948
Serpinb11	ENSMUSG00000026327	1	109258506	109277052
Serpinb7	ENSMUSG00000067001	1	109296232	109349266
Gm3608	ENSMUSG00000067017	1	107352560	107353433
Gm10193	ENSMUSG00000067015	1	107661021	107661251
D630008O14Rik	ENSMUSG00000054006	1	108438520	108471622
Pou2f3-rs1	ENSMUSG00000083613	1	108784429	108785474
Gm8080	ENSMUSG00000084228	1	108916714	108921902
Gm15388	ENSMUSG00000083884	1	109034421	109035146
Gm8084	ENSMUSG00000080729	1	109088052	109090134
Gm15390	ENSMUSG00000081114	1	109150130	109150867
Gm8089	ENSMUSG00000084189	1	109186918	109198931
Gm15391	ENSMUSG00000087210	1	109281777	109283989
AC132082.1	ENSMUSG00000076999	1	107471264	107471359
U6	ENSMUSG00000089206	1	107842131	107842237
SNORA17	ENSMUSG00000089278	1	109336624	109336754
Cdca7	ENSMUSG00000055612	2	72314216	72324950
Sp3	ENSMUSG00000027109	2	72774484	72818503
Gm11084	ENSMUSG00000079286	2	72809605	72824773
Ola1	ENSMUSG00000027108	2	72930858	73056981
Sp9	ENSMUSG00000068859	2	73109982	73122763
Cir1	ENSMUSG00000041777	2	73121162	73150758
Scrn3	ENSMUSG00000008226	2	73150658	73175875
Gpr155	ENSMUSG00000041762	2	73179563	73224629
Wipf1	ENSMUSG00000075284	2	73267667	73367791
Chrna1	ENSMUSG00000027107	2	73401272	73418395
Chn1	ENSMUSG00000056486	2	73448717	73613403
Atf2	ENSMUSG00000027104	2	73654566	73730696
Atp5g3	ENSMUSG00000018770	2	73746504	73749383
Gm10822	ENSMUSG00000075281	2	73731053	73738907
Gm13636	ENSMUSG00000081538	2	72383269	72383669
Gm13637	ENSMUSG00000080865	2	72408538	72408879
Gm13638	ENSMUSG00000083279	2	72470327	72471483
Ak3l2-ps	ENSMUSG00000081957	2	72471993	72472664
8430437L04Rik	ENSMUSG00000085252	2	72541567	72567525
6430710C18Rik	ENSMUSG00000085427	2	72583903	72651774
Hspe1-ps5	ENSMUSG00000084213	2	72793955	72794251
1700011J10Rik	ENSMUSG00000063714	2	72817481	72826734
Gm13665	ENSMUSG00000082455	2	72954796	72955332
Gm13666	ENSMUSG00000083569	2	72969802	72970600
Gm13664	ENSMUSG00000083976	2	73014668	73015012
Gm13703	ENSMUSG00000085519	2	73195325	73202390
Gm13709	ENSMUSG00000086546	2	73208966	73217354
D230022J07Rik	ENSMUSG00000087176	2	73225027	73258555
Gm13707	ENSMUSG00000085768	2	73259966	73267199
Gm13708	ENSMUSG00000086069	2	73297762	73315659
Gm13705	ENSMUSG00000086382	2	73422907	73427265
Gm13704	ENSMUSG00000086544	2	73434583	73454069
Gm13706	ENSMUSG00000085838	2	73496327	73498320
Gm13640	ENSMUSG00000081062	2	73647219	73647482
Gm13668	ENSMUSG00000083072	2	73797726	73798721
A630050E04Rik	ENSMUSG00000085387	2	73938981	73940399
Gm13667	ENSMUSG00000084791	2	73973814	73988891
4930441J16Rik	ENSMUSG00000085405	2	74136997	74145774
Mir5115	ENSMUSG00000092984	2	72850911	72850984
AL844840.1	ENSMUSG00000092851	2	72788920	72789044
AL928889.1	ENSMUSG00000092951	2	73459484	73459771
Phactr3	ENSMUSG00000027525	2	177853680	178073197
Sycp2	ENSMUSG00000060445	2	178079998	178142390
Ppp1r3d	ENSMUSG00000049999	2	178145911	178149177
9030418K01Rik	ENSMUSG00000070476	2	178149229	178159133
Cdh26	ENSMUSG00000039155	2	178165236	178222071
4930591A17Rik	ENSMUSG00000039138	2	179149641	179151587
Cdh4	ENSMUSG00000000305	2	179177136	179634078
Gm10711	ENSMUSG00000074518	2	179628614	179629398
Taf4a	ENSMUSG00000039117	2	179646851	179711351
Lsm14b	ENSMUSG00000039108	2	179759692	179770170
Psma7	ENSMUSG00000027566	2	179771078	179777138
Ss18l1	ENSMUSG00000039086	2	179777214	179804906
Gtpbp5	ENSMUSG00000039069	2	179805293	179820607
Hrh3	ENSMUSG00000039059	2	179834170	179839193
Osbpl2	ENSMUSG00000039050	2	179854011	179897385
Adrm1	ENSMUSG00000039041	2	179906190	179910991
Lama5	ENSMUSG00000015647	2	179911078	179960564
Rps21	ENSMUSG00000039001	2	179992082	179993150
Cables2	ENSMUSG00000038990	2	179993245	180008201
BC066135	ENSMUSG00000038980	2	180012351	180024584
Gm14314	ENSMUSG00000082215	2	178754824	178755838
Gm14292	ENSMUSG00000061897	2	178912130	178912585
Gm14293	ENSMUSG00000081481	2	178975195	178975771
Gm14294	ENSMUSG00000081882	2	179098998	179099748
Gm14300	ENSMUSG00000083410	2	179347327	179348272
4921531C22Rik	ENSMUSG00000085704	2	179710698	179713718
Gm14299	ENSMUSG00000082850	2	179727893	179728289
Gm17180	ENSMUSG00000090589	2	179834618	179836207
Mir3091	ENSMUSG00000092827	2	179992241	179992316
AL663067.1	ENSMUSG00000080507	2	179725502	179725587
Gata5	ENSMUSG00000015627	2	180059838	180069404
Gm14318	ENSMUSG00000056061	2	180067562	180075437
Slco4a1	ENSMUSG00000038963	2	180190950	180209572
B230312C02Rik	ENSMUSG00000084843	2	180105196	180120590
Mir133a-2	ENSMUSG00000065460	2	180133084	180133187
Mir1a-1	ENSMUSG00000070144	2	180123753	180123829
Ntsr1	ENSMUSG00000027568	2	180234681	180279685
1600027N09Rik	ENSMUSG00000027569	2	180316009	180321009
Ogfr	ENSMUSG00000049401	2	180323950	180330541
Col9a3	ENSMUSG00000027570	2	180332495	180356894
Tcfl5	ENSMUSG00000038932	2	180356661	180377413
Dido1	ENSMUSG00000038914	2	180392669	180444704
U6	ENSMUSG00000064422	2	180432768	180432874
2310003C23Rik	ENSMUSG00000027573	2	180444822	180453438
Gm8935	ENSMUSG00000045699	3	12855996	12856403
Gm2464	ENSMUSG00000078587	3	13471906	13474596
Ralyl	ENSMUSG00000039717	3	13776848	14182287
U7	ENSMUSG00000088540	3	14401731	14401788
SNORA17	ENSMUSG00000089231	3	14267315	14267439
7SK	ENSMUSG00000088546	3	13845686	13845980
7SK	ENSMUSG00000084684	3	14029482	14029762
Slc7a12	ENSMUSG00000039710	3	14480697	14505830
Lrrcc1	ENSMUSG00000027550	3	14533788	14572658
Gm17119	ENSMUSG00000090300	3	14564402	14564681
E2f5	ENSMUSG00000027552	3	14578671	14606308
1810022K09Rik	ENSMUSG00000078784	3	14606320	14611221
Car13	ENSMUSG00000027555	3	14641727	14663002
Gm5843	ENSMUSG00000084092	3	14722416	14729626
Car1	ENSMUSG00000027556	3	14766217	14778459
Car3	ENSMUSG00000027559	3	14863538	14872351
Car2	ENSMUSG00000027562	3	14886426	14900769
Gm9733	ENSMUSG00000078783	3	15296551	15332302
Sirpb1a	ENSMUSG00000044138	3	15371656	15426520
Sirpb1b	ENSMUSG00000078781	3	15495754	15575065
Sirpb1c	ENSMUSG00000074677	3	15695145	15748528
Gm5150	ENSMUSG00000078780	3	15848070	15906332
AC098884.1	ENSMUSG00000076975	3	15913818	15913927
RNaseP_nuc	ENSMUSG00000088874	3	16015615	16015943
Ythdf3	ENSMUSG00000047213	3	16083183	16117035
U6	ENSMUSG00000088644	3	16723249	16723312
SNORA48	ENSMUSG00000088541	3	17151301	17151444
Gm6369	ENSMUSG00000040217	3	18433861	18434289
Gm16093	ENSMUSG00000087108	3	19127780	19140987
Gm6141	ENSMUSG00000084339	3	19484791	19485538
Dnajc5b	ENSMUSG00000027606	3	19408595	19510862
Hps3	ENSMUSG00000027615	3	19895945	19935315
Hps3	ENSMUSG00000078774	3	19916917	19924958
Bhlhe22	ENSMUSG00000025128	3	17954325	17957509
Cyp7b1	ENSMUSG00000039519	3	17971950	18143338
Armc1	ENSMUSG00000027599	3	19032146	19063065
Mtfr1	ENSMUSG00000027601	3	19087327	19120817
Pde7a	ENSMUSG00000069094	3	19123108	19211322
1700064H15Rik	ENSMUSG00000082766	3	19510368	19528677
Trim55	ENSMUSG00000060913	3	19544460	19591599
Crh	ENSMUSG00000049796	3	19593401	19595396
4632415L05Rik	ENSMUSG00000048106	3	19794886	19795962
Cp	ENSMUSG00000003617	3	19857054	19909145
U1	ENSMUSG00000065175	3	19460253	19460416
U1	ENSMUSG00000064594	3	18077462	18077625
7SK	ENSMUSG00000089149	3	19230773	19231084
Gyg	ENSMUSG00000019528	3	20021970	20055216
Hltf	ENSMUSG00000002428	3	19957811	20018376
Cpa3	ENSMUSG00000001865	3	20115516	20142080
Cpb1	ENSMUSG00000011463	3	20148163	20174655
Agtr1b	ENSMUSG00000054988	3	20213395	20266099
Gm6289	ENSMUSG00000074196	3	144542286	144558975
AI747448	ENSMUSG00000074195	3	144573885	144595493
Clca6	ENSMUSG00000068547	3	144615444	144638009
Clca3	ENSMUSG00000028255	3	144667501	144695740
Clca5	ENSMUSG00000036960	3	144733229	144762068
Odf2l	ENSMUSG00000028256	3	144781553	144816879
Col24a1	ENSMUSG00000028197	3	144955436	145214975
Znhit6	ENSMUSG00000074182	3	145239172	145268209
Cyr61	ENSMUSG00000028195	3	145309935	145312949
Ddah1	ENSMUSG00000028194	3	145421639	145557241
Bcl10	ENSMUSG00000028191	3	145587322	145597247
2410004B18Rik	ENSMUSG00000036873	3	145600978	145607793
Syde2	ENSMUSG00000036863	3	145650834	145684684
Wdr63	ENSMUSG00000043020	3	145703490	145771094
Mcoln3	ENSMUSG00000036853	3	145780423	145804770
Mcoln2	ENSMUSG00000011008	3	145812797	145858477
Lpar3	ENSMUSG00000036832	3	145883925	145949178
Ssx2ip	ENSMUSG00000036825	3	146067606	146103103
Dnase2b	ENSMUSG00000028185	3	146067777	146259576
Ctbs	ENSMUSG00000028189	3	146113434	146128813
Spata1	ENSMUSG00000028188	3	146120167	146162717
Gng5	ENSMUSG00000068523	3	146162798	146168536
Rpf1	ENSMUSG00000028187	3	146169312	146184387
Uox	ENSMUSG00000028186	3	146260041	146295269
4930503B20Rik	ENSMUSG00000090202	3	146308157	146314281
Samd13	ENSMUSG00000048652	3	146308159	146348556
Prkacb	ENSMUSG00000005034	3	146392543	146475924
Gm10288	ENSMUSG00000070343	3	146501775	146502311
Ttll7	ENSMUSG00000036745	3	146515331	146646973
Gm16233	ENSMUSG00000085773	3	144610525	144617842
Gm16325	ENSMUSG00000085810	3	146304896	146314679
Gm17501	ENSMUSG00000090771	3	145313276	145315057
U1	ENSMUSG00000065937	3	145779066	145779218
U6	ENSMUSG00000088218	3	146050706	146050808
AC124987.1	ENSMUSG00000077892	3	146062098	146062181
Gm2442	ENSMUSG00000091938	4	41941480	41943464
Gm10596	ENSMUSG00000073880	4	41954088	41955014
Gm3893	ENSMUSG00000078744	4	41961930	41963010
Gm13304	ENSMUSG00000073878	4	41985540	41986640
Gm13306	ENSMUSG00000073877	4	42024159	42029562
Gm13305	ENSMUSG00000073876	4	42029565	42039326
1700045I11Rik	ENSMUSG00000091473	4	42041568	42042058
Gm10595	ENSMUSG00000073875	4	42090151	42090576
Gm10931	ENSMUSG00000078363	4	42214615	42216999
Gm1987	ENSMUSG00000078739	4	42231045	42232176
Gm2023	ENSMUSG00000078736	4	42248504	42250497
Gm10930	ENSMUSG00000078362	4	42285129	42290096
Gm2500	ENSMUSG00000078361	4	42336528	42337018
Gm2002	ENSMUSG00000078735	4	42339260	42349021
Gm2506	ENSMUSG00000078734	4	42349017	42354405
Ccl21c	ENSMUSG00000078732	4	42391951	42393082
Gm7819	ENSMUSG00000078731	4	42415576	42416656
Gm10929	ENSMUSG00000078360	4	42423572	42424498
Gm10594	ENSMUSG00000073873	4	42472325	42472750
4933409K07Rik	ENSMUSG00000073874	4	42473137	42474846
Gm2542	ENSMUSG00000078727	4	42536112	42541707
Gm10592	ENSMUSG00000073871	4	42594227	42595153
Gm2163	ENSMUSG00000078725	4	42602069	42603149
Gm10591	ENSMUSG00000073869	4	42625653	42626784
Ccl27b	ENSMUSG00000066202	4	42664149	42669537
Il11ra2	ENSMUSG00000066201	4	42668807	42679295
Gm9969	ENSMUSG00000055406	4	42681536	42682026
Gm10590	ENSMUSG00000073868	4	42728458	42733425
4930578G10Rik	ENSMUSG00000054885	4	42749077	42859120
Ccl19	ENSMUSG00000071005	4	42768057	42770109
Ccl21a	ENSMUSG00000071003	4	42786392	42787525
Gm12394	ENSMUSG00000078722	4	42795460	42869643
Gm12429	ENSMUSG00000078721	4	42860943	42866760
BC049635	ENSMUSG00000050141	4	42880876	42887106
N28178	ENSMUSG00000036062	4	42929532	42957624
Dnajb5	ENSMUSG00000036052	4	42962686	42972297
1700022I11Rik	ENSMUSG00000028451	4	42982818	42996511
Vcp	ENSMUSG00000028452	4	42992835	43013379
Fancg	ENSMUSG00000028453	4	43015215	43023378
Pigo	ENSMUSG00000028454	4	43030507	43038691
Stoml2	ENSMUSG00000028455	4	43040562	43044582
B230312A22Rik	ENSMUSG00000036002	4	43045286	43059092
Unc13b	ENSMUSG00000028456	4	43071825	43277745
Atp8b5	ENSMUSG00000028457	4	43280031	43386705
Rusc2	ENSMUSG00000035969	4	43394851	43439960
Fam166b	ENSMUSG00000042788	4	43439891	43442006
Tesk1	ENSMUSG00000028458	4	43454811	43460936
Cd72	ENSMUSG00000028459	4	43459334	43467500
Sit1	ENSMUSG00000028460	4	43494953	43496606
Ccdc107	ENSMUSG00000028461	4	43505772	43508793
E130306D19Rik	ENSMUSG00000051517	4	43509014	43512567
Car9	ENSMUSG00000028463	4	43519838	43526601
Tpm2	ENSMUSG00000028464	4	43527583	43536637
Tln1	ENSMUSG00000028465	4	43544391	43575563
Creb3	ENSMUSG00000028466	4	43575204	43579932
Gba2	ENSMUSG00000028467	4	43579800	43591745
Rgp1	ENSMUSG00000028468	4	43591587	43600359
Msmp	ENSMUSG00000078719	4	43596088	43597366
Npr2	ENSMUSG00000028469	4	43644807	43664116
Spag8	ENSMUSG00000066196	4	43664207	43666466
Hint2	ENSMUSG00000028470	4	43667099	43669338
4930412F15Rik	ENSMUSG00000043633	4	43672494	43682017
Tmem8b	ENSMUSG00000078716	4	43681843	43705540
Olfr70	ENSMUSG00000050215	4	43707872	43713679
Olfr71	ENSMUSG00000046450	4	43718500	43723103
Hrct1	ENSMUSG00000071001	4	43740070	43741511
Olfr159	ENSMUSG00000044801	4	43782922	43783881
Olfr156	ENSMUSG00000059448	4	43833207	43834305
Olfr157	ENSMUSG00000059101	4	43847624	43849389
Olfr155	ENSMUSG00000071000	4	43864437	43868335
Reck	ENSMUSG00000028476	4	43888402	43957678
Gm17599	ENSMUSG00000091065	4	43043871	43045354
Olfr269-ps1	ENSMUSG00000083417	4	43780348	43780649
Olfr29-ps1	ENSMUSG00000081420	4	43794253	43795200
Gm12492	ENSMUSG00000081329	4	43811768	43813127
Gm16972	ENSMUSG00000086983	4	43058906	43066125
Gm3892	ENSMUSG00000073881	4	41925875	41960431
Gm13299	ENSMUSG00000087577	4	41992336	42024158
Ccl19-ps3	ENSMUSG00000084036	4	42003282	42004894
Gm17167	ENSMUSG00000091542	4	42077721	42106036
Gm13301	ENSMUSG00000083929	4	42087631	42104185
Gm13300	ENSMUSG00000081989	4	42104736	42107058
Gm5859	ENSMUSG00000073879	4	42107582	42109905
Gm17081	ENSMUSG00000090338	4	42110448	42110925
Gm7819	ENSMUSG00000078729	4	42418155	42452715
Gm13309	ENSMUSG00000083726	4	42435300	42436901
Gm10593	ENSMUSG00000073872	4	42566010	42600570
Gm12395	ENSMUSG00000085910	4	42750125	42751626
Gm12454	ENSMUSG00000087142	4	43517300	43521619
Gm12472	ENSMUSG00000085351	4	43600944	43621627
Gm12473	ENSMUSG00000086043	4	43644411	43654405
Gm12481	ENSMUSG00000043770	4	43676833	43677211
5430416O09Rik	ENSMUSG00000028475	4	43742906	43747406
A630077J23Rik	ENSMUSG00000086864	4	43768995	43772336
5S_rRNA	ENSMUSG00000088947	4	43705558	43705689
AL732626.1	ENSMUSG00000092675	4	43644297	43644429
U7	ENSMUSG00000089028	4	43214021	43214085
RNase_MRP	ENSMUSG00000088088	4	43505660	43505930
SNORA17	ENSMUSG00000077552	4	43149371	43149500
Glipr2	ENSMUSG00000028480	4	43970273	43991990
Ccin	ENSMUSG00000070999	4	43996376	43998405
Clta	ENSMUSG00000028478	4	44017324	44045718
Coro1c	ENSMUSG00000004530	5	114292445	114358767
Ssh1	ENSMUSG00000042121	5	114387103	114443903
Dao	ENSMUSG00000042096	5	114453712	114475458
Svop	ENSMUSG00000042078	5	114476919	114541579
Usp30	ENSMUSG00000029592	5	114550342	114573515
Alkbh2	ENSMUSG00000044339	5	114573935	114578227
Ung	ENSMUSG00000029591	5	114580395	114589332
Acacb	ENSMUSG00000042010	5	114596544	114700770
Foxn4	ENSMUSG00000042002	5	114704173	114723816
Myo1h	ENSMUSG00000066952	5	114764950	114814585
Kctd10	ENSMUSG00000001098	5	114813576	114830524
Ube3b	ENSMUSG00000029577	5	114830637	114871177
Mmab	ENSMUSG00000029575	5	114881043	114894068
Mvk	ENSMUSG00000041939	5	114894278	114910600
BC057022	ENSMUSG00000041930	5	115018025	115063229
Trpv4	ENSMUSG00000014158	5	115072161	115108430
Gltp	ENSMUSG00000011884	5	115119412	115140993
Tchp	ENSMUSG00000002486	5	115157769	115172336
Git2	ENSMUSG00000041890	5	115177416	115225526
Ankrd13a	ENSMUSG00000041870	5	115224686	115256209
1500011B03Rik	ENSMUSG00000072694	5	115258205	115263985
Gm20499	ENSMUSG00000092252	5	115259045	115273469
1500011B03Rik	ENSMUSG00000092279	5	115262802	115263954
2610524H06Rik	ENSMUSG00000092486	5	115271944	115273477
Gm13821	ENSMUSG00000078186	5	115292358	115292871
4930519G04Rik	ENSMUSG00000029564	5	115303673	115333668
Gm9936	ENSMUSG00000054123	5	115305767	115308691
Oasl2	ENSMUSG00000029561	5	115346943	115362243
Oasl1	ENSMUSG00000041827	5	115373249	115387924
2210016L21Rik	ENSMUSG00000029559	5	115392167	115399792
Hnf1a	ENSMUSG00000029556	5	115398370	115421076
Sppl3	ENSMUSG00000029550	5	115461146	115548799
Gm10401	ENSMUSG00000072693	5	115547698	115548304
Acads	ENSMUSG00000029545	5	115560308	115569355
Unc119b	ENSMUSG00000046562	5	115572559	115584984
Mlec	ENSMUSG00000048578	5	115592990	115608188
Cabp1	ENSMUSG00000029544	5	115618698	115644390
Pop5	ENSMUSG00000060152	5	115685845	115695360
Rnf10	ENSMUSG00000041740	5	115691421	115722907
Coq5	ENSMUSG00000041733	5	115729675	115746981
Dynll1	ENSMUSG00000009013	5	115747119	115751008
Srsf9	ENSMUSG00000029538	5	115777186	115783089
Gatc	ENSMUSG00000029536	5	115783251	115791187
Triap1	ENSMUSG00000029535	5	115791234	115793578
Cox6a1	ENSMUSG00000041697	5	115795651	115798990
Msi1	ENSMUSG00000054256	5	115879608	115905707
4930430O22Rik	ENSMUSG00000057354	5	115886077	115886615
Pla2g1b	ENSMUSG00000029522	5	115916271	115924731
Sirt4	ENSMUSG00000029524	5	115928019	115934734
Pxn	ENSMUSG00000029528	5	115956685	116005996
Rplp0	ENSMUSG00000067274	5	116009476	116013736
Gcn1l1	ENSMUSG00000041638	5	116015263	116072665
Rab35	ENSMUSG00000029518	5	116081938	116097745
Ccdc64	ENSMUSG00000041609	5	116098184	116181630
Gm17122	ENSMUSG00000090458	5	114292610	114293125
Gm16108	ENSMUSG00000089734	5	114515470	114539475
Gm13784	ENSMUSG00000084243	5	114687185	114687934
Gm13789	ENSMUSG00000085590	5	114813424	114815366
Gm13790	ENSMUSG00000086302	5	115001298	115004025
4930515G01Rik	ENSMUSG00000092183	5	115223746	115224992
Gm13820	ENSMUSG00000078187	5	115266974	115267111
Gm13819	ENSMUSG00000082052	5	115278582	115279224
Gm13823	ENSMUSG00000080707	5	115317690	115318034
Gm13822	ENSMUSG00000087477	5	115367327	115373286
Gm13824	ENSMUSG00000086054	5	115418793	115448055
Gm13825	ENSMUSG00000086140	5	115418832	115421409
Gm13827	ENSMUSG00000086167	5	115503430	115503855
Gm13826	ENSMUSG00000072692	5	115552931	115560277
Gm13828	ENSMUSG00000083182	5	115648352	115648714
Gm13831	ENSMUSG00000083875	5	115713102	115713403
Gm13829	ENSMUSG00000082610	5	115741772	115741909
Gm13830	ENSMUSG00000086368	5	115751129	115769217
4930401G09Rik	ENSMUSG00000086352	5	115808709	115810132
Gm13832	ENSMUSG00000087292	5	115809087	115872872
Gm13836	ENSMUSG00000081282	5	115941900	115942464
Gm13840	ENSMUSG00000086849	5	115965272	115965956
Gm13841	ENSMUSG00000083833	5	116251568	116252219
U4	ENSMUSG00000075998	5	115939468	115939608
U6	ENSMUSG00000065320	5	114378733	114378813
U4	ENSMUSG00000075779	5	115940263	115940403
Cit	ENSMUSG00000029516	5	116295287	116458956
Prkab1	ENSMUSG00000029513	5	116463595	116474517
Tmem233	ENSMUSG00000079278	5	116488764	116533253
Ccdc60	ENSMUSG00000043913	5	116574650	116738994
Gm14508	ENSMUSG00000085376	5	116459325	116466114
Gm13842	ENSMUSG00000084992	5	116476420	116479239
Gm17420	ENSMUSG00000090728	5	116482155	116482322
C330018A13Rik	ENSMUSG00000086655	5	116573623	116579119
Gm14507	ENSMUSG00000086122	5	116693715	116704962
Dhx37	ENSMUSG00000029480	5	125894230	125914491
Bri3bp	ENSMUSG00000037905	5	125921938	125941242
Aacs	ENSMUSG00000029482	5	125956184	125997782
Tmem132b	ENSMUSG00000070498	5	126102858	126179143
Tmem132b	ENSMUSG00000029483	5	126259004	126268438
Gm4868	ENSMUSG00000091970	5	126328322	126329110
Tmem132c	ENSMUSG00000034324	5	127722178	128046163
1700085B03Rik	ENSMUSG00000087104	5	127737228	127762004
U6	ENSMUSG00000070220	5	126869918	126870024
U6	ENSMUSG00000084551	5	126994245	126994351
Slc15a4	ENSMUSG00000029416	5	128076034	128113267
Glt1d1	ENSMUSG00000049971	5	128112632	128189124
Tmem132d	ENSMUSG00000034310	5	128263861	128938937
Gm17132	ENSMUSG00000061331	5	128357703	128358860
Gm17131	ENSMUSG00000085328	5	128358901	128362746
AC166933.1	ENSMUSG00000077816	5	128941118	128941211
Auts2	ENSMUSG00000029673	5	131913205	133019214
7SK	ENSMUSG00000088123	5	133277548	133277826
Zan	ENSMUSG00000079173	5	137819865	137918292
Epo	ENSMUSG00000029711	5	137923487	137974470
Pop7	ENSMUSG00000029715	5	137942666	137943746
Gigyf1	ENSMUSG00000029714	5	137960108	137969162
Gnb2	ENSMUSG00000029713	5	137969355	137974738
Actl6b	ENSMUSG00000029712	5	137994745	138010810
Tfr2	ENSMUSG00000029716	5	138011079	138028709
Mospd3	ENSMUSG00000037221	5	138037873	138042286
Pcolce	ENSMUSG00000029718	5	138046331	138055012
Fbxo24	ENSMUSG00000089984	5	138053731	138070230
Lrch4	ENSMUSG00000093445	5	138070349	138082327
Lrch4	ENSMUSG00000029720	5	138070403	138084127
Sap25	ENSMUSG00000079165	5	138082562	138084130
Irs3	ENSMUSG00000047182	5	138084260	138086942
Agfg2	ENSMUSG00000029722	5	138091711	138125954
6430598A04Rik	ENSMUSG00000045348	5	138172111	138182835
Tsc22d4	ENSMUSG00000029723	5	138186958	138209678
Ppp1r35	ENSMUSG00000029725	5	138220077	138221338
Mepce	ENSMUSG00000029726	5	138223134	138227943
Zcwpw1	ENSMUSG00000037108	5	138229026	138263849
Pilra	ENSMUSG00000046245	5	138263180	138277506
Pilrb1	ENSMUSG00000066684	5	138293375	138299277
Pilrb2	ENSMUSG00000066682	5	138307057	138312986
Cyp3a13	ENSMUSG00000029727	5	138334160	138362847
Gjc3	ENSMUSG00000056966	5	138395037	138404187
Azgp1	ENSMUSG00000037053	5	138422749	138431461
Gm4963	ENSMUSG00000063739	5	138434275	138434652
Smok3a	ENSMUSG00000075599	5	138462504	138475893
Smok3b	ENSMUSG00000075598	5	138478452	138491863
Zkscan1	ENSMUSG00000029729	5	138526312	138549050
Zscan21	ENSMUSG00000037017	5	138558131	138575493
Zfp113	ENSMUSG00000037007	5	138580930	138596972
Cops6	ENSMUSG00000019494	5	138602299	138605874
Mcm7	ENSMUSG00000029730	5	138605811	138613650
Ap4m1	ENSMUSG00000019518	5	138613230	138619936
Taf6	ENSMUSG00000036980	5	138619845	138628679
Cnpy4	ENSMUSG00000036968	5	138628713	138635146
Mblac1	ENSMUSG00000049285	5	138635542	138636628
Gm454	ENSMUSG00000089783	5	138644837	138648536
BC055004	ENSMUSG00000047592	5	138667126	138694591
0910001L09Rik	ENSMUSG00000050552	5	138696836	138700626
BC037034	ENSMUSG00000036948	5	138700884	138705280
BC037034	ENSMUSG00000091964	5	138700886	138705274
Gal3st4	ENSMUSG00000075593	5	138706149	138714068
Gpc2	ENSMUSG00000029510	5	138706180	138721233
Stag3	ENSMUSG00000036928	5	138721468	138753621
Gm10874	ENSMUSG00000075591	5	138804947	138829515
Zfp157	ENSMUSG00000036898	5	138882696	138901922
1700123K08Rik	ENSMUSG00000029526	5	139003068	139005922
Zfp68	ENSMUSG00000058291	5	139045844	139060989
A430033K04Rik	ENSMUSG00000056014	5	139064087	139090052
Fam20c	ENSMUSG00000025854	5	139230468	139286031
Pdgfa	ENSMUSG00000025856	5	139451968	139473324
Gm17247	ENSMUSG00000090903	5	139461462	139461950
6330403L08Rik	ENSMUSG00000075585	5	139471010	139476530
Prkar1b	ENSMUSG00000025855	5	139493260	139625955
Heatr2	ENSMUSG00000025857	5	139626177	139662464
Sun1	ENSMUSG00000036817	5	139676591	139725794
Get4	ENSMUSG00000025858	5	139728278	139746005
Adap1	ENSMUSG00000056413	5	139747830	139801576
Cox19	ENSMUSG00000045438	5	139812143	139821187
Cyp2w1	ENSMUSG00000029541	5	139828571	139832987
3110082I17Rik	ENSMUSG00000053553	5	139835693	139936456
Gpr146	ENSMUSG00000044197	5	139853696	139872369
D830046C22Rik	ENSMUSG00000021206	5	139854174	139855213
C130050O18Rik	ENSMUSG00000044092	5	139881234	139891577
Gm17112	ENSMUSG00000090873	5	137973651	137981946
Gm16089	ENSMUSG00000081228	5	138056855	138057190
Gm15498	ENSMUSG00000079163	5	138126382	138131979
Gm15753	ENSMUSG00000082088	5	138161582	138162968
Gm15502	ENSMUSG00000083813	5	138337980	138338187
Smok3c	ENSMUSG00000079156	5	138494423	138507767
6330418K02Rik	ENSMUSG00000085227	5	138705271	138707889
Got2-ps1	ENSMUSG00000080935	5	138805488	138806780
Gm5564	ENSMUSG00000046440	5	138946066	138947174
Gm15497	ENSMUSG00000081142	5	139051967	139052517
Gm15672	ENSMUSG00000086873	5	139623530	139626647
Mir93	ENSMUSG00000065527	5	138606751	138606838
Mir339	ENSMUSG00000065593	5	139845604	139845699
U6	ENSMUSG00000064892	5	138819819	138819925
AC125115.1	ENSMUSG00000092916	5	139047927	139048009
Mir106b	ENSMUSG00000065514	5	138606965	138607046
Mir25	ENSMUSG00000065394	5	138606549	138606632
U4	ENSMUSG00000084469	5	138660965	138661044
Gpr30	ENSMUSG00000053647	5	139899105	139903754
Zfand2a	ENSMUSG00000053581	5	139947165	139960503
Uncx	ENSMUSG00000029546	5	140019448	140079180
U6	ENSMUSG00000065300	5	139919553	139919659
Lmtk2	ENSMUSG00000038970	5	144861305	144949073
Bhlha15	ENSMUSG00000052271	5	144951155	144955310
Tecpr1	ENSMUSG00000066621	5	144955311	144984484
Bri3	ENSMUSG00000047843	5	145005306	145207626
Baiap2l1	ENSMUSG00000038859	5	145025395	145118981
Nptx2	ENSMUSG00000059991	5	145306756	145318347
Tmem130	ENSMUSG00000043388	5	145496784	145522518
Trrap	ENSMUSG00000045482	5	145528961	145620647
Smurf1	ENSMUSG00000038780	5	145637364	145726716
Kpna7	ENSMUSG00000038770	5	145744388	145844899
Gm4871	ENSMUSG00000061707	5	145790469	145793633
1700018F24Rik	ENSMUSG00000029620	5	145803859	145806547
Arpc1a	ENSMUSG00000029621	5	145844699	145869630
Arpc1b	ENSMUSG00000029622	5	145875084	145891574
Pdap1	ENSMUSG00000029623	5	145889638	145901107
Bud31	ENSMUSG00000038722	5	145901231	145908947
Ptcd1	ENSMUSG00000029624	5	145908383	145927977
Cpsf4	ENSMUSG00000029625	5	145928082	145942910
Atp5j2	ENSMUSG00000038690	5	145944567	145952931
Zkscan14	ENSMUSG00000029627	5	145955815	145962751
Zkscan5	ENSMUSG00000055991	5	145965431	145982619
Zfp655	ENSMUSG00000007812	5	145992592	146008175
Zfp498	ENSMUSG00000070420	5	146044212	146052338
Cyp3a57	ENSMUSG00000070419	5	146106148	146151381
Cyp3a16	ENSMUSG00000038656	5	146197178	146230592
Cyp3a41b	ENSMUSG00000075552	5	146319544	146345599
Cyp3a41a	ENSMUSG00000075551	5	146505635	146531712
Cyp3a44	ENSMUSG00000054417	5	146585559	146617450
Cyp3a11	ENSMUSG00000056035	5	146666002	146691540
Cyp3a25	ENSMUSG00000029630	5	146788770	146821194
Cyp3a59	ENSMUSG00000061292	5	146890834	146924861
2900089D17Rik	ENSMUSG00000087484	5	145002559	145017055
Gm15708	ENSMUSG00000086894	5	145037930	145041382
Gm15709	ENSMUSG00000083574	5	145167471	145167683
Gm6272	ENSMUSG00000082524	5	145484496	145484666
SNORA70	ENSMUSG00000088685	5	145535294	145535422
AC127411.1	ENSMUSG00000093455	5	145957917	145958194
Gm4604	ENSMUSG00000091845	6	108090114	108090503
Il5ra	ENSMUSG00000005364	6	106660378	106695103
Trnt1	ENSMUSG00000013736	6	106719114	106732468
Crbn	ENSMUSG00000005362	6	106728243	106750068
Lrrn1	ENSMUSG00000034648	6	107479779	107520204
Setmar	ENSMUSG00000034639	6	108015039	108027116
Sumf1	ENSMUSG00000030101	6	108057022	108135576
Itpr1	ENSMUSG00000030102	6	108163112	108501103
Cntn4	ENSMUSG00000064293	6	105627654	106649304
AC167724.1	ENSMUSG00000093127	6	107398813	107398938
U6	ENSMUSG00000064466	6	106951446	106951552
Gm16433	ENSMUSG00000043024	6	108513599	108515582
0610040F04Rik	ENSMUSG00000087341	6	108527033	108610928
Gm17055	ENSMUSG00000090576	6	108606911	108609411
Bhlhe40	ENSMUSG00000030103	6	108610623	108616919
Arl8b	ENSMUSG00000030105	6	108733053	108773717
Edem1	ENSMUSG00000030104	6	108778635	108809350
Gm6749	ENSMUSG00000068102	6	108831995	108832405
Dll3	ENSMUSG00000003436	7	29076673	29087257
BC089491	ENSMUSG00000046750	7	29069671	29076205
Ttc9b	ENSMUSG00000007944	7	28438934	28441227
Sertad1	ENSMUSG00000008384	7	28271929	28275335
Sertad3	ENSMUSG00000055200	7	28258787	28262378
Gm17248	ENSMUSG00000090904	7	28712743	28716022
Timm50	ENSMUSG00000003438	7	29090535	29097091
Supt5h	ENSMUSG00000003435	7	29099917	29123738
Rps16	ENSMUSG00000037563	7	29135671	29137715
Plekhg2	ENSMUSG00000037552	7	29144623	29157681
Map3k10	ENSMUSG00000040390	7	28441394	28459617
C030039L03Rik	ENSMUSG00000057093	7	28474359	28491503
Zfp60	ENSMUSG00000037640	7	28516408	28538721
Zfp626	ENSMUSG00000030604	7	28592223	28603811
Zfp59	ENSMUSG00000078779	7	28627874	28641995
Zfp607	ENSMUSG00000020420	7	28647576	28664586
1700049G17Rik	ENSMUSG00000070709	7	28692411	28714479
Zfp780b	ENSMUSG00000063047	7	28747727	28759804
Zfp850	ENSMUSG00000074608	7	28769875	28770815
Psmc4	ENSMUSG00000030603	7	28826726	28835120
Fcgbp	ENSMUSG00000047730	7	28856255	28905881
Gm10935	ENSMUSG00000078384	7	28884679	28887506
Zfp36	ENSMUSG00000044786	7	29161803	29164274
Med29	ENSMUSG00000003444	7	29171165	29177727
Paf1	ENSMUSG00000003437	7	29177970	29184407
Samd4b	ENSMUSG00000037513	7	29184568	29208857
Gmfg	ENSMUSG00000060791	7	29222466	29233252
Lrfn1	ENSMUSG00000030600	7	29237257	29252567
Il28a	ENSMUSG00000059128	7	29293855	29295474
Il28b	ENSMUSG00000060747	7	29307760	29309366
Sycn	ENSMUSG00000084174	7	29325904	29327229
Nccrp1	ENSMUSG00000047586	7	29328615	29332273
Pak4	ENSMUSG00000030602	7	29343838	29383204
Gm15883	ENSMUSG00000086868	7	27909500	27915693
Gm15567	ENSMUSG00000084974	7	28034282	28042951
Gm15570	ENSMUSG00000083622	7	28056787	28057411
Pgam1-ps2	ENSMUSG00000082016	7	28254790	28255554
Gm15541	ENSMUSG00000087371	7	28287737	28293141
Gm10651	ENSMUSG00000074243	7	28734174	28734782
Shkbp1	ENSMUSG00000089832	7	28127152	28141038
Gm20479	ENSMUSG00000092367	7	28137668	28142438
Spnb4	ENSMUSG00000011751	7	28141402	28232705
Blvrb	ENSMUSG00000040466	7	28232997	28251163
Prx	ENSMUSG00000053198	7	28284343	28305233
Hipk4	ENSMUSG00000040424	7	28308280	28316194
Pld3	ENSMUSG00000003363	7	28317019	28338237
2310022A10Rik	ENSMUSG00000049643	7	28338314	28367113
9530053A07Rik	ENSMUSG00000078776	7	28914485	28949830
Fbl	ENSMUSG00000046865	7	28954765	28964288
Dyrk1b	ENSMUSG00000002409	7	28964488	28972313
Eid2	ENSMUSG00000046058	7	29052900	29054184
Eid2b	ENSMUSG00000070705	7	29062725	29065148
Vmn1r185	ENSMUSG00000091924	7	27396040	27397183
Cyp2b23	ENSMUSG00000040650	7	27450246	27471456
Cyp2b19	ENSMUSG00000066704	7	27542182	27557649
Cyp2g1	ENSMUSG00000049685	7	27593946	27606216
Cyp2a5	ENSMUSG00000005547	7	27620324	27628567
Cyp2a22	ENSMUSG00000091867	7	27716650	27724405
Cyp2a12	ENSMUSG00000060407	7	27814109	27821826
Cyp2f2	ENSMUSG00000052974	7	27904928	27918679
Cyp2t4	ENSMUSG00000078787	7	27938733	27943687
Egln2	ENSMUSG00000058709	7	27943677	27951821
Rab4b	ENSMUSG00000053291	7	27953443	27963915
Mia1	ENSMUSG00000089661	7	27953449	27966176
Snrpa	ENSMUSG00000061479	7	27972024	27981290
BC024978	ENSMUSG00000078786	7	27980800	27990405
Itpkc	ENSMUSG00000003752	7	27992191	28013647
Adck4	ENSMUSG00000003762	7	28018042	28047271
Numbl	ENSMUSG00000063160	7	28043452	28067163
Ltbp4	ENSMUSG00000040488	7	28090155	28122711
Akt2	ENSMUSG00000004056	7	28376571	28425845
Mir1191	ENSMUSG00000080533	7	27990555	27990674
SNORA40	ENSMUSG00000077711	7	29136527	29136651
Mir3101	ENSMUSG00000093348	7	27961025	27961112
U6	ENSMUSG00000064793	7	28908273	28908378
AC157561.1	ENSMUSG00000080562	7	28148333	28148420
C330005M16Rik	ENSMUSG00000037469	7	29392653	29416351
Fbxo27	ENSMUSG00000037463	7	29477868	29484357
Fbxo17	ENSMUSG00000030598	7	29501823	29523163
Capn12	ENSMUSG00000054083	7	29666675	29678604
Actn4	ENSMUSG00000054808	7	29678267	29747359
Ech1	ENSMUSG00000053898	7	29610236	29617266
Lgals4	ENSMUSG00000053964	7	29618813	29626722
Mrps12	ENSMUSG00000045948	7	29524660	29526839
Sars2	ENSMUSG00000070699	7	29527010	29538871
Nfkbib	ENSMUSG00000030595	7	29543270	29552531
Lgals7	ENSMUSG00000053522	7	29648872	29651303
Sirt2	ENSMUSG00000015149	7	29551754	29573684
Rinl	ENSMUSG00000051735	7	29573988	29583982
Hnrnpl	ENSMUSG00000015165	7	29593560	29607285
Eif3k	ENSMUSG00000053565	7	29756392	29766883
Map4k1	ENSMUSG00000037337	7	29767073	29788298
Ryr1	ENSMUSG00000030592	7	29788359	29910170
Gm16799	ENSMUSG00000087096	7	29856622	29866153
Mir1963	ENSMUSG00000089219	7	29868655	29868713
Rasgrp4	ENSMUSG00000030589	7	29919873	29938980
Gm16282	ENSMUSG00000090009	7	29923459	29925331
Fam98c	ENSMUSG00000030590	7	29937530	29941253
1110035H17Rik	ENSMUSG00000050633	7	29940699	29941937
Spred3	ENSMUSG00000037239	7	29943848	29954860
Catsperg1	ENSMUSG00000049676	7	29966340	29999054
Ggn	ENSMUSG00000031493	7	29955239	29958952
Psmd8	ENSMUSG00000030591	7	29959207	29965692
Kcnk6	ENSMUSG00000046410	7	30006947	30017541
Yif1b	ENSMUSG00000030588	7	30023348	30032612
2200002D01Rik	ENSMUSG00000030587	7	30031580	30033451
Spint2	ENSMUSG00000074227	7	30041350	30066996
Ppp1r14a	ENSMUSG00000037166	7	30074339	30078409
Dpf1	ENSMUSG00000030584	7	30088970	30102607
Sipa1l3	ENSMUSG00000030583	7	30105397	30290479
Gm17113	ENSMUSG00000061115	7	29968055	29968402
4932431P20Rik	ENSMUSG00000074224	7	30304224	30323076
4930432E11Rik	ENSMUSG00000046958	7	30345534	30360497
6330444E15Rik	ENSMUSG00000051976	7	30363894	30364853
n-R5s153	ENSMUSG00000065385	7	30442180	30442295
Catsperg2	ENSMUSG00000049123	7	30482238	30512051
U6	ENSMUSG00000065659	7	30522337	30522443
Zfp84	ENSMUSG00000046185	7	30553571	30564840
Mir1964	ENSMUSG00000089139	7	30558313	30558395
Zfp30	ENSMUSG00000047473	7	30569017	30579721
Zfp790	ENSMUSG00000011427	7	30601091	30617061
Zfp940	ENSMUSG00000050855	7	30618639	30638688
Gm17199	ENSMUSG00000090331	7	30640659	30641074
Gm17551	ENSMUSG00000092015	7	30638104	30644044
Zfp420	ENSMUSG00000058402	7	30644998	30700678
Gm10169	ENSMUSG00000083669	7	30750237	30750584
Zfp27	ENSMUSG00000062040	7	30678352	30691591
Zfp74	ENSMUSG00000059975	7	30715834	30739108
C230062I16Rik	ENSMUSG00000063623	7	30738640	30741011
Zfp568	ENSMUSG00000074221	7	30768974	30813301
Zfp14	ENSMUSG00000053985	7	30823072	30829753
Gm10989	ENSMUSG00000078770	7	30839755	30840586
Zfp82	ENSMUSG00000058447	7	30841057	30857842
Zfp566	ENSMUSG00000078768	7	30862356	30875529
Zfp260	ENSMUSG00000049421	7	30879796	30892641
AC164703.1	ENSMUSG00000093495	7	30885859	30885954
Zfp382	ENSMUSG00000074220	7	30906961	30919684
Gm10988	ENSMUSG00000078767	7	30936893	30937764
Zfp146	ENSMUSG00000037029	7	30946293	30954746
Gm5113	ENSMUSG00000066647	7	30954894	30965228
Rps12-ps5	ENSMUSG00000081565	7	31048282	31048670
Gm17440	ENSMUSG00000092079	7	30983649	30985908
Cox7a1	ENSMUSG00000074218	7	30969190	30971047
Capns1	ENSMUSG00000001794	7	30971961	30980183
Tbcb	ENSMUSG00000006095	7	31009150	31017291
Polr2i	ENSMUSG00000019738	7	31016967	31018409
Ovol3	ENSMUSG00000056028	7	31018512	31020744
Wdr62	ENSMUSG00000037020	7	31025157	31065438
Thap8	ENSMUSG00000013928	7	31065113	31075256
Clip3	ENSMUSG00000013921	7	31076691	31093386
Alkbh6	ENSMUSG00000042831	7	31093736	31099323
AI428936	ENSMUSG00000019737	7	31099826	31104065
Sdhaf1	ENSMUSG00000074211	7	31106430	31107394
E130208F15Rik	ENSMUSG00000074210	7	31106759	31108491
AC149067.1	ENSMUSG00000093571	7	31096544	31096914
Lrfn3	ENSMUSG00000036957	7	31140533	31147791
U2	ENSMUSG00000064982	7	31141751	31141943
Tyrobp	ENSMUSG00000030579	7	31198807	31202596
Hcst	ENSMUSG00000064109	7	31202732	31204873
Nfkbid	ENSMUSG00000036931	7	31206751	31213765
Aplp1	ENSMUSG00000006651	7	31220001	31230580
Kirrel2	ENSMUSG00000036915	7	31232553	31242709
Nphs1	ENSMUSG00000006649	7	31243334	31272242
Nphs1as	ENSMUSG00000087009	7	31247183	31250610
Prodh2	ENSMUSG00000036892	7	31278641	31298421
9530052E02Rik	ENSMUSG00000085270	8	11007850	11054541
E230013L22Rik	ENSMUSG00000090605	8	11477929	11480241
Col4a2	ENSMUSG00000031503	8	11312805	11449287
Gm15418	ENSMUSG00000085573	8	11187755	11204503
Gm15419	ENSMUSG00000084783	8	11399186	11417892
1700128E19Rik	ENSMUSG00000031510	8	11713264	11722620
Gm15875	ENSMUSG00000086500	8	11838978	11840400
Rab20	ENSMUSG00000031504	8	11453392	11478638
Carkd	ENSMUSG00000031505	8	11497602	11513284
Cars2	ENSMUSG00000056228	8	11514021	11550771
Ing1	ENSMUSG00000045969	8	11556066	11563250
Ankrd10	ENSMUSG00000031508	8	11611583	11635754
1700016D06Rik	ENSMUSG00000031509	8	11654921	11678750
Arhgef7	ENSMUSG00000031511	8	11728105	11835219
1700018L24Rik	ENSMUSG00000031512	8	11840474	11855761
A230072I06Rik	ENSMUSG00000074473	8	12278819	12280657
Gm5607	ENSMUSG00000047935	8	12385771	12436729
Spaca7	ENSMUSG00000010435	8	12573049	12600738
Tubgcp3	ENSMUSG00000000759	8	12614277	12672248
Myo16	ENSMUSG00000039057	8	10272572	10634741
3930402G23Rik	ENSMUSG00000038917	8	10924427	10928457
Irs2	ENSMUSG00000038894	8	10986980	11008458
Col4a1	ENSMUSG00000031502	8	11198423	11312826
7SK	ENSMUSG00000089234	8	12356153	12356469
AC102525.1	ENSMUSG00000092656	8	12396403	12396488
4931415C17Rik	ENSMUSG00000054910	8	12672186	12679229
Gm15348	ENSMUSG00000074469	8	12706944	12719127
Atp11a	ENSMUSG00000031441	8	12757014	12868728
AC127677.1	ENSMUSG00000088641	8	12666095	12666198
Mcf2l	ENSMUSG00000031442	8	12873806	13020905
Gm15350	ENSMUSG00000084780	8	12828335	12833865
Gm15347	ENSMUSG00000085465	8	12860358	12877344
Gm15353	ENSMUSG00000079146	8	12879878	12883726
Gm15351	ENSMUSG00000086770	8	12899146	12915758
Gm15349	ENSMUSG00000082682	8	12971826	12972029
Gm15352	ENSMUSG00000081951	8	13021941	13022210
F7	ENSMUSG00000031443	8	13026034	13035809
F10	ENSMUSG00000031444	8	13037308	13056676
Proz	ENSMUSG00000031445	8	13060908	13075006
Gm17023	ENSMUSG00000091443	8	13076077	13082740
Pcid2	ENSMUSG00000038542	8	13077189	13105459
Gm17022	ENSMUSG00000091784	8	13086517	13087428
Cul4a	ENSMUSG00000031446	8	13105621	13147940
Fat1	ENSMUSG00000070047	8	46035562	46137611
Mtnr1a	ENSMUSG00000054764	8	46154491	46173710
F11	ENSMUSG00000031645	8	46326524	46347385
Klkb1	ENSMUSG00000031640	8	46354796	46380213
Cyp4v3	ENSMUSG00000079057	8	46355025	46418570
Fam149a	ENSMUSG00000070044	8	46422071	46467645
Tlr3	ENSMUSG00000031639	8	46481019	46495962
Sorbs2	ENSMUSG00000031626	8	46593148	46913259
Pdlim3	ENSMUSG00000031636	8	46970839	47004900
Ccdc110	ENSMUSG00000071104	8	47019973	47029499
1700029J07Rik	ENSMUSG00000071103	8	47038960	47060606
Ufsp2	ENSMUSG00000031634	8	47060882	47082312
Ankrd37	ENSMUSG00000050914	8	47082256	47085221
Lrp2bp	ENSMUSG00000031637	8	47084657	47114831
Snx25	ENSMUSG00000038291	8	47118615	47237513
4933411K20Rik	ENSMUSG00000031631	8	47237125	47280944
Slc25a4	ENSMUSG00000031633	8	47292151	47296638
Gm10313	ENSMUSG00000071102	8	47340031	47341032
Helt	ENSMUSG00000047171	8	47377404	47380025
Acsl1	ENSMUSG00000018796	8	47556395	47621405
Mlf1ip	ENSMUSG00000031629	8	47637409	47665361
Ccdc111	ENSMUSG00000038225	8	47660933	47702566
Casp3	ENSMUSG00000031628	8	47702803	47724060
Irf2	ENSMUSG00000031627	8	47825099	47932812
Gm2366	ENSMUSG00000091546	8	46102570	46107739
Gm16675	ENSMUSG00000085052	8	47816326	47824869
AY512931	ENSMUSG00000066158	8	46146056	46150772
Gm16351	ENSMUSG00000084954	8	46673266	46682098
D330022K07Rik	ENSMUSG00000085440	8	46808679	46904651
Gm16352	ENSMUSG00000084994	8	46808682	46823393
Gm15878	ENSMUSG00000087542	8	47034966	47035271
Gm15634	ENSMUSG00000086279	8	47237964	47241454
Actg-ps1	ENSMUSG00000074978	8	47314920	47315327
U6atac	ENSMUSG00000080378	8	46949832	46949957
7SK	ENSMUSG00000088629	8	47192613	47192885
SNORA17	ENSMUSG00000077499	8	46666970	46667101
U6	ENSMUSG00000089561	8	47357405	47357501
AC114558.1	ENSMUSG00000078036	8	47166242	47166337
AC156551.1	ENSMUSG00000092897	8	47315148	47315231
Enpp6	ENSMUSG00000038173	8	48072279	48180249
Stox2	ENSMUSG00000038143	8	48265402	48437702
Gm10083	ENSMUSG00000060559	8	48498483	48500713
4930448N21Rik	ENSMUSG00000086634	8	48379626	48531716
4930579M01Rik	ENSMUSG00000086190	8	48112159	48123531
AC102862.1	ENSMUSG00000092710	8	48525772	48525905
AC102862.2	ENSMUSG00000093558	8	48547620	48547815
D030016E14Rik	ENSMUSG00000038102	8	48575469	48618824
Rwdd4a	ENSMUSG00000031568	8	48619018	48638179
Gm8623	ENSMUSG00000062458	8	48717683	48718118
Ing2	ENSMUSG00000063049	8	48752532	48760910
AA386476	ENSMUSG00000074357	8	48760745	48762409
Cdkn2aip	ENSMUSG00000038069	8	48794698	48799285
n-R5s96	ENSMUSG00000064508	8	48804600	48804723
1700047G07Rik	ENSMUSG00000053206	8	99036240	99037431
Gm5913	ENSMUSG00000081111	8	99951130	99953079
AC128668.1	ENSMUSG00000077938	8	99180029	99180119
U6	ENSMUSG00000089539	8	99746434	99746535
AC164603.1	ENSMUSG00000077125	8	99779741	99779850
Cnksr3	ENSMUSG00000015202	10	3134304	3227478
Ipcef1	ENSMUSG00000064065	10	3294063	3460745
Oprm1	ENSMUSG00000000766	10	3308332	3588035
Gm10945	ENSMUSG00000078488	10	3584780	3605912
Gm15536	ENSMUSG00000081926	10	3307767	3307880
Rgs17	ENSMUSG00000019775	10	4424141	4520878
Mtrf1l	ENSMUSG00000019774	10	4522631	4534654
Fbxo5	ENSMUSG00000019773	10	4540941	4547381
Vip	ENSMUSG00000019772	10	4698927	4707323
Myct1	ENSMUSG00000046916	10	4739754	4752813
Syne1	ENSMUSG00000019769	10	4795849	5326338
AC162387.1	ENSMUSG00000092769	10	4659162	4659257
U6	ENSMUSG00000077596	10	4989262	4989368
Gm10097	ENSMUSG00000061261	10	5277031	5277348
Esr1	ENSMUSG00000019768	10	5340927	5734948
AC161829.1	ENSMUSG00000093189	10	5310085	5310366
SNORD88	ENSMUSG00000084430	10	5570951	5571041
Gm16153	ENSMUSG00000085687	10	5923172	5937508
Gm221	ENSMUSG00000019767	10	5784310	5864039
1700052N19Rik	ENSMUSG00000061759	10	5891400	5914074
Rmnd1	ENSMUSG00000019763	10	5914153	5944626
Zbtb2	ENSMUSG00000075327	10	5958433	5979467
Akap12	ENSMUSG00000038587	10	5987073	6080212
Mthfd1l	ENSMUSG00000040675	10	6179460	6373423
U1	ENSMUSG00000065371	10	5862148	5862307
U8	ENSMUSG00000089473	10	6176523	6176654
U1	ENSMUSG00000065792	10	6242072	6242228
RNase_MRP	ENSMUSG00000088375	10	5778328	5778567
Gm16074	ENSMUSG00000082247	10	6353727	6354170
Gm16148	ENSMUSG00000082605	10	6399450	6400342
Plekhg1	ENSMUSG00000040624	10	6379238	6606177
5S_rRNA	ENSMUSG00000089392	10	6411664	6411772
Gm16149	ENSMUSG00000082123	10	6476934	6477242
Iyd	ENSMUSG00000019762	10	6791664	6806301
Ppp1r14c	ENSMUSG00000040653	10	6881566	6980391
H60c	ENSMUSG00000091618	10	7078791	7088611
9230019H11Rik	ENSMUSG00000071434	10	7216995	7226702
Gm16760	ENSMUSG00000086086	10	6979406	6982468
AC155833.1	ENSMUSG00000080655	10	6921426	6921518
Gm16254	ENSMUSG00000087350	10	7325882	7326611
Gm20470	ENSMUSG00000092190	10	7463318	7480897
B430219N15Rik	ENSMUSG00000085211	10	7500066	7501155
Gm15560	ENSMUSG00000081497	10	7527914	7528556
Lrp11	ENSMUSG00000019796	10	7309598	7345281
Pcmt1	ENSMUSG00000019795	10	7349171	7400934
Nup43	ENSMUSG00000040034	10	7387301	7398679
Lats1	ENSMUSG00000040021	10	7401007	7436256
Katna1	ENSMUSG00000019794	10	7445798	7482948
BC013529	ENSMUSG00000040006	10	7487745	7512598
6530403G13Rik	ENSMUSG00000052979	10	7512321	7512620
Ppil4	ENSMUSG00000015757	10	7512689	7542933
Zc3h12d	ENSMUSG00000039981	10	7552268	7590195
Tab2	ENSMUSG00000015755	10	7625451	7676028
Ust	ENSMUSG00000047712	10	7924551	8238623
Sash1	ENSMUSG00000015305	10	8442017	8605868
Gm17280	ENSMUSG00000091633	10	8604392	8606678
U6	ENSMUSG00000077582	10	8362732	8362837
Mir5104	ENSMUSG00000093060	10	7556179	7556272
SNORA36	ENSMUSG00000065692	10	8543809	8543945
AC091522.1	ENSMUSG00000093360	10	8498358	8498428
SNORA40	ENSMUSG00000088857	10	7568159	7568279
Gm9930	ENSMUSG00000053980	10	9252329	9255479
Samd5	ENSMUSG00000060487	10	9347057	9395006
Utrn	ENSMUSG00000019820	10	12101986	12589163
Stx11	ENSMUSG00000039232	10	12659787	12684065
Sf3b5	ENSMUSG00000078348	10	12728256	12728988
Plagl1	ENSMUSG00000019817	10	12810497	12851500
Fam164b	ENSMUSG00000019815	10	12869346	12897829
Ltv1	ENSMUSG00000019814	10	12898446	12912943
Phactr2	ENSMUSG00000062866	10	12933201	13194202
Fuca2	ENSMUSG00000019810	10	13219346	13238841
Pex3	ENSMUSG00000019809	10	13243648	13272948
Adat2	ENSMUSG00000019808	10	13272700	13283182
Aig1	ENSMUSG00000019806	10	13366860	13588786
Hivep2	ENSMUSG00000015501	10	13686185	13871182
Gm8330	ENSMUSG00000091527	10	13686830	13727211
B230208H11Rik	ENSMUSG00000085233	10	12636446	12642898
U6	ENSMUSG00000064531	10	13608343	13608449
U1	ENSMUSG00000065096	10	12083208	12083371
U6	ENSMUSG00000088516	10	12513673	12513772
SNORA73	ENSMUSG00000065181	10	12088421	12088630
5730522E02Rik	ENSMUSG00000032985	11	25502763	26110763
5730522E02Rik	ENSMUSG00000073101	11	26110483	26110566
Fancl	ENSMUSG00000004018	11	26286135	26371876
Vrk2	ENSMUSG00000064090	11	26371322	26493999
Gm6899	ENSMUSG00000068314	11	26493241	26493862
Gm12069	ENSMUSG00000086439	11	25201263	25222786
4933427E13Rik	ENSMUSG00000033015	11	25226107	25267137
Gm12713	ENSMUSG00000081811	11	26309207	26310501
Gm12071	ENSMUSG00000082038	11	26612905	26613373
Gm12070	ENSMUSG00000069939	11	26686627	26687816
Gm12072	ENSMUSG00000082294	11	26745107	26745457
Gm12073	ENSMUSG00000080987	11	26756387	26756910
Gm12074	ENSMUSG00000083895	11	26951697	26951915
SNORA17	ENSMUSG00000077669	11	25138588	25138715
U1	ENSMUSG00000065889	11	26237540	26237703
n-R5s68	ENSMUSG00000084588	11	26985126	26985207
SNORA17	ENSMUSG00000088654	11	26987017	26987135
SNORA61	ENSMUSG00000064761	11	25585140	25585269
Gm12075	ENSMUSG00000080735	11	27317990	27318386
Gm12077	ENSMUSG00000081658	11	27398867	27399587
Gm12076	ENSMUSG00000082243	11	27407625	27408100
Gm12079	ENSMUSG00000084064	11	27783112	27783355
SNORA17	ENSMUSG00000088438	11	27218847	27218978
Gm12123	ENSMUSG00000082309	11	35136701	35137172
Gm12122	ENSMUSG00000086311	11	35163571	35164287
Gm12124	ENSMUSG00000082688	11	35606283	35606961
Gm12125	ENSMUSG00000081571	11	35809556	35810291
Gm12126	ENSMUSG00000087245	11	35894166	35897356
Gm12127	ENSMUSG00000086375	11	36091543	36093489
Slit3	ENSMUSG00000056427	11	34934726	35522009
Pank3	ENSMUSG00000018846	11	35582986	35604787
Fbll1	ENSMUSG00000051062	11	35610883	35612386
Rars	ENSMUSG00000018848	11	35621883	35648008
Wwc1	ENSMUSG00000018849	11	35651902	35794029
Odz2	ENSMUSG00000049336	11	35820158	37049466
Mir103-1	ENSMUSG00000065553	11	35595898	35595983
U6	ENSMUSG00000065173	11	36536384	36536489
Mir218-2	ENSMUSG00000065583	11	35430318	35430427
AL731688.1	ENSMUSG00000092992	11	35533215	35533284
SNORA17	ENSMUSG00000088125	11	35027903	35028039
Gm12128	ENSMUSG00000087388	11	37472491	37486668
Gm12130	ENSMUSG00000087296	11	38306832	38333515
Gm12131	ENSMUSG00000083806	11	39540572	39541214
Gm12132	ENSMUSG00000085301	11	39821696	40151333
U6	ENSMUSG00000070249	11	38611673	38611779
U1	ENSMUSG00000088603	11	39644158	39644302
Hmgb1-ps1	ENSMUSG00000084129	11	40955265	40955898
Gm12139	ENSMUSG00000086475	11	41032339	41034598
Gm12140	ENSMUSG00000081112	11	41191580	41192123
Gm12141	ENSMUSG00000058809	11	41312178	41314411
Gm12142	ENSMUSG00000081847	11	41404624	41405536
A230004M16Rik	ENSMUSG00000087306	11	41523844	41786619
Gm12143	ENSMUSG00000084293	11	41602990	41603321
Gabrg2	ENSMUSG00000020436	11	41723697	41814359
Gabra1	ENSMUSG00000010803	11	41944441	41996432
Gabra6	ENSMUSG00000020428	11	42119939	42134574
Gabrb2	ENSMUSG00000007653	11	42233259	42446092
Gm9972	ENSMUSG00000055456	11	42849248	42850780
7SK	ENSMUSG00000084627	11	42710997	42711308
Gm12145	ENSMUSG00000085951	11	42919642	42929796
Atp10b	ENSMUSG00000055415	11	42963379	43075787
Gm12146	ENSMUSG00000085533	11	43010926	43073286
Gm12144	ENSMUSG00000086170	11	43043065	43045766
Gm12147	ENSMUSG00000086791	11	43073293	43124590
Gm12148	ENSMUSG00000084889	11	43198984	43200685
Mir146	ENSMUSG00000065601	11	43187899	43187963
Pttg1	ENSMUSG00000020415	11	43233752	43239753
Gm12151	ENSMUSG00000084307	11	43276698	43276987
Slu7	ENSMUSG00000020409	11	43247246	43261483
C1qtnf2	ENSMUSG00000046491	11	43287778	43305027
Ccnjl	ENSMUSG00000044707	11	43342286	43400499
Gm12150	ENSMUSG00000085239	11	43393104	43394618
4933415A04Rik	ENSMUSG00000045877	11	43400542	43402550
Gm12149	ENSMUSG00000082614	11	43428619	43429831
Fabp6	ENSMUSG00000020405	11	43409551	43415042
Gm12152	ENSMUSG00000083662	11	43484303	43484986
Pwwp2a	ENSMUSG00000044950	11	43495500	43534993
Ttc1	ENSMUSG00000041278	11	43543014	43561510
Adra1b	ENSMUSG00000050541	11	43588108	43714712
Hspa4	ENSMUSG00000020361	11	53073316	53113959
Zcchc10	ENSMUSG00000018239	11	53138181	53146803
Aff4	ENSMUSG00000049470	11	53164335	53235332
Leap2	ENSMUSG00000036216	11	53235683	53236672
Uqcrq	ENSMUSG00000044894	11	53241424	53244333
Gdf9	ENSMUSG00000018238	11	53244525	53251406
Gm10447	ENSMUSG00000072963	11	53268306	53270612
Shroom1	ENSMUSG00000018387	11	53270707	53281268
Gm9837	ENSMUSG00000049427	11	53283251	53283981
Sowaha	ENSMUSG00000044352	11	53290075	53293776
Gm9945	ENSMUSG00000054450	11	53293668	53294599
Sept8	ENSMUSG00000018398	11	53332759	53363067
Kif3a	ENSMUSG00000018395	11	53380881	53417746
Il4	ENSMUSG00000000869	11	53416484	53432171
Il13	ENSMUSG00000020383	11	53444826	53448204
Rad50	ENSMUSG00000020380	11	53463021	53520821
Il5	ENSMUSG00000036117	11	53534296	53538608
Irf1	ENSMUSG00000018899	11	53583516	53591876
Gm17334	ENSMUSG00000091191	11	53585783	53586689
Gm12216	ENSMUSG00000081769	11	53596920	53672758
Gm11006	ENSMUSG00000078860	11	53606266	53606378
Slc22a5	ENSMUSG00000018900	11	53678044	53705162
Slc22a21	ENSMUSG00000063652	11	53763467	53793834
Slc22a4	ENSMUSG00000020334	11	53796625	53841592
Pdlim4	ENSMUSG00000020388	11	53868430	53882516
P4ha2	ENSMUSG00000018906	11	53913597	53945167
Csf2	ENSMUSG00000018916	11	54060773	54063169
Il3	ENSMUSG00000018914	11	54078805	54080779
Acsl6	ENSMUSG00000020333	11	54117300	54178258
4930404A10Rik	ENSMUSG00000020332	11	54184154	54240292
Fnip1	ENSMUSG00000035992	11	54251701	54331737
Rapgef6	ENSMUSG00000037533	11	54336349	54512787
Cdc42se2	ENSMUSG00000052298	11	54530958	54601177
Lyrm7	ENSMUSG00000020268	11	54640368	54674418
Hint1	ENSMUSG00000020267	11	54679885	54684003
Gpx3	ENSMUSG00000018339	11	54715955	54723879
Tnip1	ENSMUSG00000020400	11	54724289	54776419
Anxa6	ENSMUSG00000018340	11	54792610	54846947
Ccdc69	ENSMUSG00000049588	11	54863233	54891633
Gm2a	ENSMUSG00000000594	11	54911617	54926531
Slc36a3	ENSMUSG00000049491	11	54938317	54965210
Slc36a2	ENSMUSG00000020264	11	54971972	54998579
Slc36a1	ENSMUSG00000020261	11	55017852	55049832
Gm11188	ENSMUSG00000082263	11	53158792	53159179
Gm12212	ENSMUSG00000085707	11	53275881	53277115
Rpl9-ps3	ENSMUSG00000085718	11	53314686	53315264
A430108G06Rik	ENSMUSG00000086851	11	53378190	53380815
Rps2-ps4	ENSMUSG00000084373	11	53459246	53459878
Gm12214	ENSMUSG00000086595	11	53537455	53538120
Gm12213	ENSMUSG00000083986	11	53547081	53547433
Gm12217	ENSMUSG00000082271	11	53715692	53717070
Gm12218	ENSMUSG00000082380	11	53716259	53716657
Gm12220	ENSMUSG00000081098	11	53742807	53742978
Gm12219	ENSMUSG00000080768	11	53780565	53781007
Gm12221	ENSMUSG00000036045	11	53972428	53973558
4933405E24Rik	ENSMUSG00000086209	11	53991274	54026787
Gm12222	ENSMUSG00000060068	11	54012932	54013194
Gm12223	ENSMUSG00000085585	11	54061102	54067997
Gm12224	ENSMUSG00000085888	11	54153871	54166981
Gm12226	ENSMUSG00000078151	11	54214594	54215469
Gm12225	ENSMUSG00000084212	11	54217642	54217939
Gm12227	ENSMUSG00000086039	11	54542179	54547825
Gm12229	ENSMUSG00000082503	11	54559859	54560326
Gm12228	ENSMUSG00000086789	11	54633421	54638469
Gm12230	ENSMUSG00000082180	11	54760937	54761390
Gm12231	ENSMUSG00000044751	11	54931603	54932297
Mup-ps22	ENSMUSG00000080738	11	54937197	54937439
Gm12233	ENSMUSG00000085531	11	54950546	54953695
4921508A21Rik	ENSMUSG00000084980	11	55005221	55011366
7SK	ENSMUSG00000084419	11	53514681	53514990
AL607091.1	ENSMUSG00000093341	11	54471999	54472075
U6	ENSMUSG00000088437	11	54271664	54271771
U1	ENSMUSG00000088231	11	54643213	54643382
U6	ENSMUSG00000064719	11	53203904	53204010
4930534B04Rik	ENSMUSG00000061533	12	92236932	92622849
Tshr	ENSMUSG00000020963	12	92639433	92778949
Gtf2a1	ENSMUSG00000020962	12	92794356	92828927
Ston2	ENSMUSG00000020961	12	92876982	93026827
Sel1l	ENSMUSG00000020964	12	93044483	93087597
5430427M07Rik	ENSMUSG00000085004	12	92288809	92318347
Gm8378	ENSMUSG00000090722	12	92913252	92924553
Gm16876	ENSMUSG00000086689	12	92923105	92932030
Rpl31-ps1	ENSMUSG00000066389	12	93129336	93129713
Gm2228	ENSMUSG00000060323	12	93399333	93399770
4930544I03Rik	ENSMUSG00000092100	12	91991648	92208208
7SK	ENSMUSG00000084566	12	92219665	92219987
SNORA17	ENSMUSG00000089439	12	92053637	92053765
AC154375.1	ENSMUSG00000077096	12	93030050	93030114
SNORA79	ENSMUSG00000080365	12	92811870	92812012
Kif26a	ENSMUSG00000021294	12	113384446	113419957
A730018C14Rik	ENSMUSG00000047828	12	113652126	113661423
A530016L24Rik	ENSMUSG00000043122	12	113727659	113738138
Tmem179	ENSMUSG00000054013	12	113738395	113749371
Inf2	ENSMUSG00000037679	12	113826995	113853767
Adssl1	ENSMUSG00000011148	12	113858258	113879565
Siva1	ENSMUSG00000064326	12	113883039	113887363
Akt1	ENSMUSG00000001729	12	113892032	113913095
Zbtb42	ENSMUSG00000037638	12	113917039	113920958
AW555464	ENSMUSG00000072825	12	113960385	113984802
Pld4	ENSMUSG00000052160	12	113998866	114007197
Ahnak2	ENSMUSG00000072812	12	114010405	114040868
BC022687	ENSMUSG00000037594	12	114047186	114054456
Cdca4	ENSMUSG00000047832	12	114058448	114067600
Gpr132	ENSMUSG00000021298	12	114089087	114099127
Gm17723	ENSMUSG00000091222	12	114131774	114133577
Jag2	ENSMUSG00000002799	12	114146801	114167706
Nudt14	ENSMUSG00000002804	12	114172944	114180329
Brf1	ENSMUSG00000011158	12	114198073	114238832
Btbd6	ENSMUSG00000002803	12	114214693	114217141
Pacs2	ENSMUSG00000021143	12	114252719	114312612
Tex22	ENSMUSG00000012211	12	114312713	114327128
Mta1	ENSMUSG00000021144	12	114336489	114375417
Crip2	ENSMUSG00000006356	12	114378447	114383715
Crip1	ENSMUSG00000006360	12	114390223	114392088
4930427A07Rik	ENSMUSG00000037466	12	114394632	114413736
Tmem121	ENSMUSG00000049036	12	114424114	114427731
Ighe	ENSMUSG00000087642	12	114509391	114511457
Ighg2c	ENSMUSG00000076612	12	114523536	114527141
Gm17421	ENSMUSG00000090726	12	114606713	114607927
Gm11029	ENSMUSG00000078993	12	114655095	114657149
Adam6b	ENSMUSG00000051804	12	114727756	114730229
Adam6a	ENSMUSG00000043945	12	114782119	114784625
Gm17274	ENSMUSG00000090980	12	114184574	114188723
Ighe	ENSMUSG00000076611	12	114509484	114511358
Ighg2b	ENSMUSG00000076613	12	114544600	114546144
Ighg1	ENSMUSG00000076614	12	114567187	114568734
Ighg3	ENSMUSG00000076615	12	114597876	114599443
Ighm	ENSMUSG00000076617	12	114659078	114660941
Ighj4	ENSMUSG00000076618	12	114666725	114666778
Ighj3	ENSMUSG00000076619	12	114667296	114667343
Ighj2	ENSMUSG00000076620	12	114667725	114667778
Ighj1	ENSMUSG00000076621	12	114667992	114668044
Ighd4-1	ENSMUSG00000076622	12	114668739	114668749
Ighd3-2	ENSMUSG00000076623	12	114686425	114686440
Ighd5-6	ENSMUSG00000091062	12	114687799	114687810
Ighd2-8	ENSMUSG00000076624	12	114689062	114689078
Ighd5-5	ENSMUSG00000091857	12	114693153	114693162
Ighd2-7	ENSMUSG00000076625	12	114694931	114694947
Ighd5-8	ENSMUSG00000091051	12	114698075	114698103
Ighd5-4	ENSMUSG00000091630	12	114698312	114698321
Ighd2-6	ENSMUSG00000076626	12	114699580	114699596
Ighd5-7	ENSMUSG00000092160	12	114702735	114702763
Ighd5-3	ENSMUSG00000091334	12	114702972	114702981
Ighd2-5	ENSMUSG00000076627	12	114704238	114704254
Ighd5-2	ENSMUSG00000091394	12	114707637	114707646
Ighd2-4	ENSMUSG00000076628	12	114708905	114708921
Ighd6-2	ENSMUSG00000091704	12	114713086	114713114
Ighd2-3	ENSMUSG00000076629	12	114713611	114713627
Ighd6-1	ENSMUSG00000090563	12	114718354	114718382
Ighd1-1	ENSMUSG00000076630	12	114720381	114720403
Ighd3-1	ENSMUSG00000076631	12	114763524	114763540
Ighd5-1	ENSMUSG00000091517	12	114765011	114765020
Gm16968	ENSMUSG00000076632	12	114766243	114766265
Ighv2-1	ENSMUSG00000091606	12	114812453	114812892
Ighv5-2	ENSMUSG00000076633	12	114816715	114817201
Ighv2-2	ENSMUSG00000076634	12	114826478	114826911
Ighv5-4	ENSMUSG00000076635	12	114835657	114836116
Ighv2-3	ENSMUSG00000076636	12	114849395	114849828
Ighv5-6	ENSMUSG00000076637	12	114863717	114864167
Ighv2-4	ENSMUSG00000076638	12	114891502	114891935
Gm17309	ENSMUSG00000090395	12	114893178	114893455
Ighv5-9	ENSMUSG00000076639	12	114899980	114900439
Ighv2-5	ENSMUSG00000076640	12	114923693	114924126
Ighv5-12	ENSMUSG00000076641	12	114940335	114940789
Ighv2-6	ENSMUSG00000076642	12	114954886	114955314
Ighv5-9-1	ENSMUSG00000076643	12	114974322	114974781
Ighv2-9-1	ENSMUSG00000076645	12	115008061	115008494
Ighv2-6-8	ENSMUSG00000076646	12	115034354	115034778
Ighv2-7	ENSMUSG00000076647	12	115045525	115045958
Ighv5-15	ENSMUSG00000076648	12	115064857	115065332
Ighv5-16	ENSMUSG00000076649	12	115076737	115077194
Ighv5-17	ENSMUSG00000076650	12	115097360	115097827
Ighv2-9	ENSMUSG00000076651	12	115117307	115117740
Ighv7-1	ENSMUSG00000076652	12	115134625	115135157
Ighv7-2	ENSMUSG00000076653	12	115150236	115150694
Ighv14-1	ENSMUSG00000076654	12	115170164	115170593
Ighv4-1	ENSMUSG00000076655	12	115186493	115186943
Ighv3-1	ENSMUSG00000076669	12	115202599	115202894
Ighv11-1	ENSMUSG00000076657	12	115220090	115220552
Ighv14-2	ENSMUSG00000076658	12	115232680	115233109
Ighv3-2	ENSMUSG00000078992	12	115272144	115272302
Ighv11-2	ENSMUSG00000076659	12	115286452	115286915
Ighv14-3	ENSMUSG00000076660	12	115298056	115298484
Ighv16-1	ENSMUSG00000076661	12	115307039	115307337
Ighv9-1	ENSMUSG00000076662	12	115332139	115332432
Ighv9-2	ENSMUSG00000076663	12	115347212	115347641
Ighv9-3	ENSMUSG00000076664	12	115378903	115379333
AC073553.3	ENSMUSG00000092748	12	114663361	114663438
AC073553.2	ENSMUSG00000092737	12	114662960	114663029
U6	ENSMUSG00000087842	12	114452360	114452463
AC073553.1	ENSMUSG00000092683	12	114662856	114662933
Ighv7-3	ENSMUSG00000076665	12	115391395	115391855
Ighv14-4	ENSMUSG00000076666	12	115414655	115415073
Ighv3-3	ENSMUSG00000076667	12	115434650	115434945
Ighv7-4	ENSMUSG00000076668	12	115460999	115461465
Ighv3-5	ENSMUSG00000076670	12	115500483	115501161
Ighv13-1	ENSMUSG00000076671	12	115505818	115506117
Ighv3-6	ENSMUSG00000076672	12	115526363	115526793
Ighv9-4	ENSMUSG00000076673	12	115538172	115538465
Ighv3-8	ENSMUSG00000076674	12	115560585	115561012
Ighv13-2	ENSMUSG00000087582	12	115595972	115596429
Ighv12-3	ENSMUSG00000076676	12	115604737	115605165
Ighv6-3	ENSMUSG00000076677	12	115629923	115630380
Ighv6-6	ENSMUSG00000076680	12	115672999	115673455
Ighv1-2	ENSMUSG00000078991	12	115707316	115707438
Ighv10-1	ENSMUSG00000076683	12	115717216	115717662
Ighv1-4	ENSMUSG00000076684	12	115725347	115725780
Ighv1-5	ENSMUSG00000076685	12	115751541	115751834
Ighv10-3	ENSMUSG00000076686	12	115761652	115762098
Ighv1-7	ENSMUSG00000076687	12	115776706	115776999
Ighv15-2	ENSMUSG00000076688	12	115802789	115803223
Ighv1-9	ENSMUSG00000076689	12	115821780	115822213
Ighv1-12	ENSMUSG00000076691	12	115854061	115854354
Gm17686	ENSMUSG00000090765	12	115868891	115869184
Ighv1-14	ENSMUSG00000076692	12	115884783	115885076
Ighv1-15	ENSMUSG00000076693	12	115895567	115895988
Ighv1-18	ENSMUSG00000076695	12	115920885	115921276
Ighv1-19	ENSMUSG00000076696	12	115946859	115947292
Ighv1-20	ENSMUSG00000076697	12	115961983	115962416
Ighv1-22	ENSMUSG00000076698	12	115984484	115984917
Ighv1-23	ENSMUSG00000076699	12	116002664	116003085
Ighv1-24	ENSMUSG00000076700	12	116011139	116011432
Ighv1-26	ENSMUSG00000076701	12	116026583	116027016
Ighv1-30	ENSMUSG00000076694	12	116055310	116055601
Ighv1-31	ENSMUSG00000076702	12	116067475	116067768
Ighv1-33	ENSMUSG00000078971	12	116081862	116082154
Ighv1-34	ENSMUSG00000076703	12	116089401	116089834
Ighv1-36	ENSMUSG00000076704	12	116118099	116118532
Ighv1-37	ENSMUSG00000076705	12	116134449	116134882
Ighv1-39	ENSMUSG00000076706	12	116152810	116153243
Ighv1-42	ENSMUSG00000076707	12	116175324	116175617
Ighv1-43	ENSMUSG00000076708	12	116184161	116184454
Ighv1-47	ENSMUSG00000076709	12	116229319	116229612
Ighv1-49	ENSMUSG00000076710	12	116293434	116293727
Ighv8-5	ENSMUSG00000076711	12	116305787	116306207
Ighv1-50	ENSMUSG00000076712	12	116357959	116358391
Ighv1-52	ENSMUSG00000076713	12	116383698	116384130
Ighv1-53	ENSMUSG00000076714	12	116396614	116397046
Ighv8-6	ENSMUSG00000076715	12	116403988	116404288
Ighv1-54	ENSMUSG00000076716	12	116431886	116432319
Ighv1-55	ENSMUSG00000076717	12	116446306	116446738
Ighv1-56	ENSMUSG00000076718	12	116481013	116481306
Ighv8-8	ENSMUSG00000076719	12	116532289	116532709
Ighv1-58	ENSMUSG00000076720	12	116550377	116550807
Ighv1-59	ENSMUSG00000076721	12	116573293	116573725
Ighv1-61	ENSMUSG00000076722	12	116597351	116597783
Ighv1-62-1	ENSMUSG00000090959	12	116625110	116625199
Ighv1-62-2	ENSMUSG00000091241	12	116684620	116684921
Ighv1-62-3	ENSMUSG00000076723	12	116699210	116699642
Ighv8-9	ENSMUSG00000076724	12	116706543	116706843
Ighv1-63	ENSMUSG00000076725	12	116733836	116734269
Ighv1-64	ENSMUSG00000076726	12	116745756	116746188
Ighv8-11	ENSMUSG00000076727	12	116805376	116805796
Ighv1-66	ENSMUSG00000076728	12	116831321	116831754
Ighv1-67	ENSMUSG00000076729	12	116842151	116842444
Ighv1-69	ENSMUSG00000076730	12	116861372	116861806
Ighv8-12	ENSMUSG00000076731	12	116886172	116886572
Ighv1-71	ENSMUSG00000091301	12	116980416	116980717
Ighv1-72	ENSMUSG00000076732	12	116996195	116996627
Ighv8-13	ENSMUSG00000076733	12	117003544	117003846
Ighv1-73	ENSMUSG00000057610	12	117028913	117029095
Gm16710	ENSMUSG00000076734	12	117040859	117041291
Ighv8-14	ENSMUSG00000091087	12	117046672	117046791
Ighv1-75	ENSMUSG00000076735	12	117072161	117072607
Zfp386	ENSMUSG00000042063	12	117280562	117299060
Vipr2	ENSMUSG00000011171	12	117316196	117384734
Wdr60	ENSMUSG00000042050	12	117445523	117501498
Gm11027	ENSMUSG00000078984	12	117513859	117514085
Esyt2	ENSMUSG00000021171	12	117519695	117611569
D430020J02Rik	ENSMUSG00000091262	12	117643573	117664338
Ncapg2	ENSMUSG00000042029	12	117643875	117702004
Ptprn2	ENSMUSG00000056553	12	117724193	118516640
RP24-386J17.2	ENSMUSG00000093765	12	117341242	117377121
Gm17626	ENSMUSG00000091100	12	117286040	117290093
Ighv1-76	ENSMUSG00000091843	12	117086092	117086385
Ighv1-77	ENSMUSG00000092156	12	117100078	117100371
Ighv1-78	ENSMUSG00000091338	12	117106984	117107277
Ighv1-80	ENSMUSG00000076738	12	117150555	117150987
Ighv1-81	ENSMUSG00000076739	12	117158490	117158923
Ighv1-82	ENSMUSG00000076740	12	117190749	117191042
Ighv1-83	ENSMUSG00000076741	12	117202028	117202318
Ighv1-84	ENSMUSG00000076742	12	117218913	117219345
Ighv1-85	ENSMUSG00000076743	12	117238239	117238672
U6	ENSMUSG00000065685	12	117411786	117411892
U6	ENSMUSG00000084629	12	117715369	117715472
Mir153	ENSMUSG00000065538	12	118489290	118489358
Rapgef5	ENSMUSG00000041992	12	118754952	118995451
5S_rRNA	ENSMUSG00000089482	12	118812815	118812920
Htr1a	ENSMUSG00000021721	13	106233773	106238213
Dph3b-ps	ENSMUSG00000059877	13	107336892	107337140
Ipo11	ENSMUSG00000042590	13	107584519	107726995
Ipo11	ENSMUSG00000078933	13	107623940	107637347
Dimt1	ENSMUSG00000021692	13	107737209	107750304
Kif2a	ENSMUSG00000021693	13	107749076	107812206
3830408C21Rik	ENSMUSG00000071181	13	107822043	107823753
Apoo-ps	ENSMUSG00000049233	13	108204221	108204817
snoU2-30	ENSMUSG00000077261	13	107780482	107780547
U6	ENSMUSG00000064854	13	107570194	107570300
Zswim6	ENSMUSG00000032846	13	108514698	108680258
AC165250.1	ENSMUSG00000093334	13	108619304	108619469
4931414P19Rik	ENSMUSG00000022179	14	55202500	55224745
Rem2	ENSMUSG00000022176	14	55094937	55099271
Gm11067	ENSMUSG00000079234	14	55056348	55056679
Lrp10	ENSMUSG00000022175	14	55083001	55090334
Cpne6	ENSMUSG00000022212	14	56129282	56136268
Jph4	ENSMUSG00000022208	14	55725667	55735772
Traj27	ENSMUSG00000076902	14	54811978	54812036
Traj32	ENSMUSG00000076897	14	54805776	54805841
Traj33	ENSMUSG00000076896	14	54805033	54805089
Traj34	ENSMUSG00000076895	14	54804374	54804431
Irf9	ENSMUSG00000002325	14	56222408	56228867
Rec8	ENSMUSG00000002324	14	56236874	56244232
Haus4	ENSMUSG00000022177	14	55160622	55173198
Jub	ENSMUSG00000022178	14	55186309	55196253
Gm20521	ENSMUSG00000092232	14	55502278	55516974
Pabpn1	ENSMUSG00000022194	14	55511337	55517006
Slc22a17	ENSMUSG00000022199	14	55525564	55531969
Efs	ENSMUSG00000022203	14	55535380	55545625
Il25	ENSMUSG00000040770	14	55551608	55554671
Cmtm5	ENSMUSG00000040759	14	55555307	55558093
Myh6	ENSMUSG00000040752	14	55560758	55585764
Myh7	ENSMUSG00000053093	14	55589525	55613471
Gm17428	ENSMUSG00000090889	14	55595770	55595862
Ngdn	ENSMUSG00000022204	14	55634291	55642972
Zfhx2	ENSMUSG00000040721	14	55679099	55711161
Thtpa	ENSMUSG00000045691	14	55713672	55717823
Ap1g2	ENSMUSG00000040701	14	55717415	55725430
Psmb5	ENSMUSG00000022193	14	55232644	55236851
Psmb11	ENSMUSG00000072423	14	55244147	55248393
Cdh24	ENSMUSG00000059674	14	55250829	55260201
CT009512.1	ENSMUSG00000092443	14	55251166	55251618
Gm17606	ENSMUSG00000091306	14	55259789	55262854
Acin1	ENSMUSG00000022185	14	55260998	55305768
Dhrs2	ENSMUSG00000022209	14	55840844	55860272
Gm8894	ENSMUSG00000060680	14	56039106	56039561
Dhrs4	ENSMUSG00000022210	14	56097595	56109175
Lrrc16b	ENSMUSG00000022211	14	56109930	56127083
Trav15-2-dv6-2	ENSMUSG00000076848	14	54269062	54269668
Trav9-4	ENSMUSG00000076850	14	54295816	54296304
Trav5-4	ENSMUSG00000076852	14	54323682	54324188
Trav7-6	ENSMUSG00000076854	14	54336391	54336965
Trav13-4-dv7	ENSMUSG00000076856	14	54377031	54377595
Trav3-4	ENSMUSG00000076858	14	54396631	54397250
Trav18	ENSMUSG00000076861	14	54450780	54451501
Trav21-dv12	ENSMUSG00000076863	14	54495659	54496426
Traj31	ENSMUSG00000076898	14	54807570	54807626
Traj30	ENSMUSG00000076899	14	54809541	54809599
Traj29	ENSMUSG00000076900	14	54810621	54810680
Traj28	ENSMUSG00000076901	14	54811336	54811400
Trav13-3	ENSMUSG00000082663	14	54349179	54349856
Gm14031	ENSMUSG00000085302	14	54357977	54360713
4930579G18Rik	ENSMUSG00000040840	14	55269348	55273444
Gm8865	ENSMUSG00000086420	14	55445084	55445513
Ppp1r3e	ENSMUSG00000093691	14	55491518	55495488
Gm10364	ENSMUSG00000072492	14	55657299	55661816
RP23-171A13.8	ENSMUSG00000093452	14	55675015	55691234
Gm15932	ENSMUSG00000086341	14	56186056	56194828
1700123O20Rik	ENSMUSG00000040822	14	55305008	55309579
Cebpe	ENSMUSG00000052435	14	55329200	55331011
Slc7a8	ENSMUSG00000022180	14	55341053	55400723
Gm10332	ENSMUSG00000071425	14	55435324	55472771
Homez	ENSMUSG00000057156	14	55471573	55489798
Ppp1r3e	ENSMUSG00000072494	14	55491518	55496387
Bcl2l2	ENSMUSG00000089682	14	55502214	55507071
Nrl	ENSMUSG00000040632	14	56137815	56143818
Pck2	ENSMUSG00000040618	14	56159103	56168854
A730061H03Rik	ENSMUSG00000053588	14	56178779	56179243
Dcaf11	ENSMUSG00000022214	14	56178843	56188902
Fitm1	ENSMUSG00000022215	14	56194454	56195789
Psme1	ENSMUSG00000022216	14	56196960	56200366
Fam158a	ENSMUSG00000022217	14	56200353	56204139
Psme2	ENSMUSG00000079197	14	56206278	56209950
Rnf31	ENSMUSG00000047098	14	56210545	56222530
B230359F08Rik	ENSMUSG00000087666	14	54415035	54417507
Dad1	ENSMUSG00000022174	14	54855154	54873779
Abhd4	ENSMUSG00000040997	14	54878907	54888829
Olfr49	ENSMUSG00000048153	14	54901571	54902600
Oxa1l	ENSMUSG00000000959	14	54980525	54989353
Slc7a7	ENSMUSG00000000958	14	54989128	55032856
Mrpl52	ENSMUSG00000010406	14	55045746	55048587
Mmp14	ENSMUSG00000000957	14	55050441	55060095
Trdv2-1	ENSMUSG00000076865	14	54565748	54566335
Trdv2-2	ENSMUSG00000076866	14	54580668	54581274
Trdv4	ENSMUSG00000076867	14	54694679	54695190
Trdd1	ENSMUSG00000076868	14	54733143	54733153
Trdd2	ENSMUSG00000076869	14	54741901	54741916
Trdj1	ENSMUSG00000076870	14	54742813	54742863
Trdj2	ENSMUSG00000076871	14	54756454	54756512
Trdv5	ENSMUSG00000076873	14	54768337	54768876
Traj61	ENSMUSG00000090574	14	54774680	54774751
Traj60	ENSMUSG00000090782	14	54775608	54775661
Traj59	ENSMUSG00000076874	14	54775808	54775871
Traj58	ENSMUSG00000076875	14	54776955	54777017
Traj57	ENSMUSG00000076876	14	54778180	54778244
Traj56	ENSMUSG00000076877	14	54778938	54779000
Traj55	ENSMUSG00000091005	14	54781114	54781176
Traj54	ENSMUSG00000091326	14	54781665	54781718
Traj53	ENSMUSG00000076878	14	54782319	54782384
Traj52	ENSMUSG00000076879	14	54784991	54785056
Traj51	ENSMUSG00000076880	14	54785914	54785956
Traj50	ENSMUSG00000076881	14	54787265	54787327
Traj49	ENSMUSG00000076882	14	54788361	54788419
Traj48	ENSMUSG00000076883	14	54789484	54789543
Traj46	ENSMUSG00000076884	14	54792011	54792073
Traj45	ENSMUSG00000076885	14	54792503	54792565
Traj44	ENSMUSG00000076886	14	54793365	54793425
Traj43	ENSMUSG00000076887	14	54794417	54794473
Traj42	ENSMUSG00000076888	14	54795448	54795511
Traj41	ENSMUSG00000076889	14	54795946	54796000
Traj40	ENSMUSG00000076890	14	54797596	54797656
Traj39	ENSMUSG00000076891	14	54799637	54799699
Traj38	ENSMUSG00000076892	14	54800249	54800310
Traj37	ENSMUSG00000076893	14	54801193	54801252
Traj36	ENSMUSG00000090494	14	54802077	54802139
Traj35	ENSMUSG00000076894	14	54803449	54803513
Trav12-3	ENSMUSG00000076845	14	54241332	54241918
Trav13-2	ENSMUSG00000076846	14	54254504	54255073
Trav14-2	ENSMUSG00000076847	14	54260376	54260899
Trav3-3	ENSMUSG00000076849	14	54285604	54286180
Trav4-4-dv10	ENSMUSG00000076851	14	54303322	54303851
Trav6-7-dv9	ENSMUSG00000076853	14	54329577	54330092
Gm13896	ENSMUSG00000076855	14	54362779	54363381
Trav14-3	ENSMUSG00000076857	14	54382758	54384718
Trav17	ENSMUSG00000076860	14	54426200	54426788
Trav19	ENSMUSG00000076862	14	54464909	54465501
Trav20	ENSMUSG00000086858	14	54482807	54483332
Trdv1	ENSMUSG00000076864	14	54501207	54501891
Prmt5	ENSMUSG00000023110	14	55126024	55136362
Traj26	ENSMUSG00000076903	14	54814165	54814224
Traj25	ENSMUSG00000076904	14	54814490	54814546
Traj24	ENSMUSG00000076905	14	54815313	54815375
Traj23	ENSMUSG00000076906	14	54815756	54815815
Traj22	ENSMUSG00000076907	14	54816923	54816982
Traj21	ENSMUSG00000076908	14	54818465	54818521
Traj20	ENSMUSG00000076909	14	54819116	54819173
Traj19	ENSMUSG00000076910	14	54820061	54820121
Traj18	ENSMUSG00000076911	14	54820452	54820517
Traj17	ENSMUSG00000076912	14	54821450	54821512
Traj16	ENSMUSG00000076913	14	54822809	54822869
Traj15	ENSMUSG00000076914	14	54824097	54824156
Traj14	ENSMUSG00000076915	14	54824786	54824818
Traj13	ENSMUSG00000076916	14	54825416	54825472
Traj12	ENSMUSG00000076917	14	54826228	54826285
Traj11	ENSMUSG00000076918	14	54826814	54826872
Traj9	ENSMUSG00000076919	14	54829068	54829125
Traj8	ENSMUSG00000076920	14	54829593	54829629
Traj7	ENSMUSG00000076921	14	54831145	54831203
Traj6	ENSMUSG00000076922	14	54832363	54832424
Traj5	ENSMUSG00000076923	14	54833452	54833513
Traj4	ENSMUSG00000076924	14	54835966	54836028
Traj3	ENSMUSG00000076925	14	54836967	54837032
Traj2	ENSMUSG00000076926	14	54837511	54837576
Traj1	ENSMUSG00000076927	14	54838489	54838515
Trac	ENSMUSG00000076928	14	54840196	54842772
Mir208b	ENSMUSG00000077928	14	55594537	55594613
SNORA17	ENSMUSG00000077492	14	55780314	55780445
Mir208a	ENSMUSG00000065432	14	55567897	55567979
U6	ENSMUSG00000064973	14	55068795	55068901
7SK	ENSMUSG00000089469	14	54736729	54737068
Mir686	ENSMUSG00000076128	14	55235514	55235622
U6	ENSMUSG00000064742	14	55200014	55200120
Ipo4	ENSMUSG00000002319	14	56244237	56256732
Nedd8	ENSMUSG00000010376	14	56281102	56290743
Tm9sf1	ENSMUSG00000002320	14	56254802	56262643
Tssk4	ENSMUSG00000007591	14	56269019	56271376
Mdp1	ENSMUSG00000002329	14	56276716	56279345
Gmpr2	ENSMUSG00000002326	14	56291072	56297587
Tinf2	ENSMUSG00000007589	14	56295455	56300654
Tgm1	ENSMUSG00000022218	14	56318846	56332329
U2	ENSMUSG00000088402	14	56302671	56302754
Pou4f1	ENSMUSG00000048349	14	104861537	104867208
Rnf219	ENSMUSG00000022120	14	104876751	104921883
Rbm26	ENSMUSG00000022119	14	105505968	105576544
Ndfip2	ENSMUSG00000053253	14	105657928	105708515
4930449E01Rik	ENSMUSG00000022116	14	105898005	105904839
9330188P03Rik	ENSMUSG00000087212	14	105988844	105993124
Gm10076	ENSMUSG00000060143	14	106081045	106081421
Spry2	ENSMUSG00000022114	14	106291166	106296036
Gm17066	ENSMUSG00000091509	14	105508607	105513893
Gm16259	ENSMUSG00000086260	14	105691649	105692201
AC140340.1	ENSMUSG00000092664	14	106216125	106216217
U6	ENSMUSG00000077541	14	104990311	104990417
U6	ENSMUSG00000064715	14	105676096	105676203
SNORA17	ENSMUSG00000077719	14	105028161	105028277
SNORA17	ENSMUSG00000077425	14	105370644	105370777
U6	ENSMUSG00000064411	14	105649227	105649333
Gm6219	ENSMUSG00000071244	14	106492367	106493050
Gm4775	ENSMUSG00000090538	14	106499970	106500374
Trim52	ENSMUSG00000022113	14	106505415	106508497
U4	ENSMUSG00000065193	14	106660340	106660470
Gm4666	ENSMUSG00000071243	14	106877503	106878186
Gm17366	ENSMUSG00000091723	14	107097326	107097515
SNORA52	ENSMUSG00000089297	14	106916606	106916712
SNORA17	ENSMUSG00000077224	14	107165247	107165373
AC114406.1	ENSMUSG00000092834	14	108778781	108778941
Rpl27a-ps2	ENSMUSG00000058430	14	109091411	109091860
Slitrk1	ENSMUSG00000075478	14	109309208	109313456
SNORA17	ENSMUSG00000089455	14	109021760	109021877
Gm6280	ENSMUSG00000060796	14	111370010	111370693
Slitrk6	ENSMUSG00000045871	14	111147800	111154371
SNORA17	ENSMUSG00000089119	14	110282271	110282400
AC134912.1	ENSMUSG00000093128	14	110350616	110350711
n-R5s50	ENSMUSG00000065102	14	110561057	110561167
U6	ENSMUSG00000065268	14	110996838	110996944
U6	ENSMUSG00000084441	14	111131258	111131360
U6	ENSMUSG00000064989	14	110827379	110827485
Slitrk5	ENSMUSG00000033214	14	112074337	112082356
U6	ENSMUSG00000088995	14	112365179	112365270
AC123985.1	ENSMUSG00000093362	14	111681268	111681356
Acot10	ENSMUSG00000047565	15	20594974	20596505
Cdh12	ENSMUSG00000040452	15	21041207	21519288
SNORA17	ENSMUSG00000089258	15	20838627	20838754
U6	ENSMUSG00000064812	15	21044124	21044230
Cdh18	ENSMUSG00000040420	15	22478777	23404173
Gm5803	ENSMUSG00000021927	15	22643623	22644585
Ctnnd2	ENSMUSG00000022240	15	30102348	30959066
Dap	ENSMUSG00000039168	15	31154140	31204093
Fam136b-ps	ENSMUSG00000055416	15	31206246	31206662
Ankrd33b	ENSMUSG00000022237	15	31221234	31297514
Ropn1l	ENSMUSG00000022236	15	31370965	31383444
March6	ENSMUSG00000039100	15	31385654	31460792
Cmbl	ENSMUSG00000022235	15	31498546	31519874
Cct5	ENSMUSG00000022234	15	31520555	31531602
Fam173b	ENSMUSG00000039065	15	31531607	31550982
Tas2r119	ENSMUSG00000045267	15	32107044	32108051
Sema5a	ENSMUSG00000022231	15	32174568	32626096
Gm6361	ENSMUSG00000068964	15	31376135	31376572
0610007N19Rik	ENSMUSG00000090401	15	32170324	32174417
SNORD123	ENSMUSG00000089317	15	32171608	32171678
U7	ENSMUSG00000088364	15	30531345	30531406
U7	ENSMUSG00000087874	15	30531269	30531331
SNORA17	ENSMUSG00000077468	15	31123960	31124093
5S_rRNA	ENSMUSG00000087836	15	30520042	30520160
Myc	ENSMUSG00000022346	15	61816946	61821929
Gsdmc	ENSMUSG00000079025	15	63607526	63640314
Gsdmc2	ENSMUSG00000056293	15	63655901	63667504
Gsdmcl1	ENSMUSG00000062543	15	63678864	63682497
Gsdmc3	ENSMUSG00000055827	15	63689826	63700852
Gsdmc4	ENSMUSG00000055748	15	63722820	63734491
Fam49b	ENSMUSG00000022378	15	63760652	63892010
H2afy3	ENSMUSG00000056590	15	62049096	62050958
Pvt1	ENSMUSG00000072566	15	61869542	62209651
SNORA17	ENSMUSG00000088897	15	62624756	62624889
AC134453.1	ENSMUSG00000093058	15	62484490	62484559
U7	ENSMUSG00000088828	15	63312769	63312831
Tmem30c	ENSMUSG00000022753	16	57266252	57292978
2610528E23Rik	ENSMUSG00000022748	16	57302312	57606979
Filip1l	ENSMUSG00000043336	16	57353206	57573239
Col8a1	ENSMUSG00000068196	16	57624371	57754850
Dcbld2	ENSMUSG00000035107	16	58408556	58469840
St3gal6	ENSMUSG00000022747	16	58468238	58524356
Gm813	ENSMUSG00000075002	16	58613799	58617091
E330017A01Rik	ENSMUSG00000055789	16	58635280	58638852
Cpox	ENSMUSG00000022742	16	58670321	58680504
Gpr15	ENSMUSG00000047293	16	58717548	58718837
Cldn25	ENSMUSG00000022744	16	58728023	58734364
Olfr172	ENSMUSG00000071510	16	58760265	58761353
Olfr173	ENSMUSG00000049362	16	58796575	58797738
Olfr175-ps1	ENSMUSG00000060663	16	58823607	58826587
Olfr177	ENSMUSG00000063137	16	58872045	58872974
Olfr178	ENSMUSG00000044029	16	58889085	58890044
Olfr180	ENSMUSG00000090629	16	58915512	58918312
Olfr181	ENSMUSG00000090951	16	58925383	58928470
Olfr183	ENSMUSG00000062105	16	58995230	59000442
Olfr186	ENSMUSG00000047960	16	59026749	59027753
Olfr187	ENSMUSG00000043357	16	59035606	59039575
Olfr190	ENSMUSG00000064006	16	59073981	59074904
Olfr191	ENSMUSG00000057533	16	59085378	59086307
Olfr193	ENSMUSG00000060057	16	59109451	59110457
Olfr194	ENSMUSG00000063020	16	59118974	59119894
Olfr195	ENSMUSG00000062608	16	59148655	59149649
Olfr196	ENSMUSG00000063603	16	59167038	59167967
Olfr198	ENSMUSG00000052537	16	59201292	59202345
Olfr199	ENSMUSG00000074996	16	59215511	59216441
4930461C15Rik	ENSMUSG00000086827	16	58404991	58408389
Olfr192	ENSMUSG00000059041	16	59097892	59098816
Olfr197	ENSMUSG00000061501	16	59185382	59186307
SNORA17	ENSMUSG00000077595	16	58751591	58751709
SNORA17	ENSMUSG00000077573	16	57884121	57884252
Csnka2ip	ENSMUSG00000068167	16	64477639	64478974
4930453N24Rik	ENSMUSG00000059920	16	64751577	64770987
Zfp654	ENSMUSG00000047141	16	64780177	64786147
Cggbp1	ENSMUSG00000054604	16	64851822	64859333
Htr1f	ENSMUSG00000050783	16	64924555	65105610
Pou1f1	ENSMUSG00000004842	16	65520847	65535250
Chmp2b	ENSMUSG00000004843	16	65539378	65562942
Vgll3	ENSMUSG00000091243	16	65815878	65863302
U6	ENSMUSG00000064449	16	66255031	66255137
AC118240.1	ENSMUSG00000077011	16	65432472	65432581
7SK	ENSMUSG00000088181	16	65961470	65961782
AC163694.1	ENSMUSG00000093149	16	64918048	64918131
SNORA17	ENSMUSG00000089178	16	65169867	65169996
Cadm2	ENSMUSG00000064115	16	66655666	67621153
1700010K23Rik	ENSMUSG00000092599	16	66657363	66664871
Gm20469	ENSMUSG00000092400	16	66690512	66694350
4933411O13Rik	ENSMUSG00000045178	16	66892748	66911086
Gm15828	ENSMUSG00000082823	16	67592950	67593471
Robo2	ENSMUSG00000052516	16	73892551	74412070
Lipi	ENSMUSG00000032948	16	75540759	75586301
Gm17459	ENSMUSG00000090978	16	75573523	75574485
Rbm11	ENSMUSG00000032940	16	75593089	75603074
Hspa13	ENSMUSG00000032932	16	75755435	75767066
Samsn1	ENSMUSG00000022876	16	75859038	76022515
Gm15553	ENSMUSG00000080750	16	75746295	75746724
Gm15554	ENSMUSG00000081250	16	75772669	75773223
AC129776.1	ENSMUSG00000092693	16	75764567	75764676
SNORA17	ENSMUSG00000088392	16	74608002	74608127
AC134452.1	ENSMUSG00000076284	16	73974686	73974783
SNORA70	ENSMUSG00000089033	16	74059144	74059278
Nrip1	ENSMUSG00000048490	16	76287645	76374072
Gm9843	ENSMUSG00000050299	16	76403454	76403957
Usp25	ENSMUSG00000022867	16	77014314	77117024
2810055G20Rik	ENSMUSG00000090386	16	77329504	77598689
2810055G20Rik	ENSMUSG00000052450	16	77500751	77598776
Gm11146	ENSMUSG00000079546	16	77588823	77602339
Gm17333	ENSMUSG00000091193	16	77846938	77853265
Mir99a	ENSMUSG00000065530	16	77599181	77599245
Mir125b-2	ENSMUSG00000065472	16	77646518	77646588
SNORA17	ENSMUSG00000077197	16	76132786	76132916
Mirlet7c-1	ENSMUSG00000065557	16	77599902	77599995
Srbd1	ENSMUSG00000024135	17	86384005	86544515
Prkce	ENSMUSG00000045038	17	86567125	87057259
Gm10309	ENSMUSG00000071036	17	86897072	86904572
Epas1	ENSMUSG00000024140	17	87153247	87232750
1700090G07Rik	ENSMUSG00000037689	17	87316688	87321706
Atp6v1e2	ENSMUSG00000053375	17	87343449	87347227
Rhoq	ENSMUSG00000024143	17	87362422	87399409
Pigf	ENSMUSG00000024145	17	87396596	87424746
Cript	ENSMUSG00000024146	17	87424890	87435150
Socs5	ENSMUSG00000037104	17	87507019	87536923
Mcfd2	ENSMUSG00000024150	17	87653998	87665275
Ttc7	ENSMUSG00000036918	17	87682226	87781110
1700011E24Rik	ENSMUSG00000036557	17	87788911	87827081
Calm2	ENSMUSG00000036438	17	87832752	87846275
Epcam	ENSMUSG00000045394	17	88035319	88050446
Msh2	ENSMUSG00000024151	17	88071670	88123053
Kcnk12	ENSMUSG00000050138	17	88145177	88197334
Msh6	ENSMUSG00000005370	17	88374390	88390223
Fbxo11	ENSMUSG00000005371	17	88390199	88464631
Gm5499	ENSMUSG00000071035	17	87477611	87478498
4833418N02Rik	ENSMUSG00000085287	17	87674226	87682154
Gm15978	ENSMUSG00000089701	17	87729104	87731392
0610012D04Rik	ENSMUSG00000089755	17	87761579	87763802
Gm4832	ENSMUSG00000058869	17	88530055	88530345
SNORA17	ENSMUSG00000089427	17	87852563	87852696
U6	ENSMUSG00000087710	17	87102638	87102747
SNORA40	ENSMUSG00000087736	17	87453034	87453165
AC129309.1	ENSMUSG00000080546	17	87583445	87583565
Gm17287	ENSMUSG00000091319	17	88545424	88559101
4930511M06Rik	ENSMUSG00000086607	18	57533109	57712051
Megf10	ENSMUSG00000024593	18	57292744	57457121
Prrc1	ENSMUSG00000024594	18	57514387	57552373
Ctxn3	ENSMUSG00000069372	18	57628140	57637788
1700011I03Rik	ENSMUSG00000058925	18	57693434	57890719
Slc12a2	ENSMUSG00000024597	18	58038332	58106475
Fbn2	ENSMUSG00000024598	18	58168277	58369580
Slc27a6	ENSMUSG00000024600	18	58715911	58772427
Isoc1	ENSMUSG00000024601	18	58819136	58839224
Adamts19	ENSMUSG00000053441	18	58996418	59213332
1700066O22Rik	ENSMUSG00000085800	18	57664076	57693406
Gm17593	ENSMUSG00000091641	18	58369906	58381539
SNORA17	ENSMUSG00000077243	18	58775013	58775143
U6	ENSMUSG00000088776	18	57829107	57829212
5S_rRNA	ENSMUSG00000089095	18	58391126	58391229

## Sheet: wk14IgG1to3-Prn
Gene Name	Ensembl Gene ID	Chromosome	Start	End
Pcmtd1	ENSMUSG00000051285	1	7079001	7163707
Sntg1	ENSMUSG00000025909	1	8351556	9289959
Gm9826	ENSMUSG00000048538	1	7167820	7169118
Gm16284	ENSMUSG00000086235	1	8458507	8458906
Gm15452	ENSMUSG00000084353	1	8782004	8782243
Gm6152	ENSMUSG00000086195	1	8846009	8846348
Gm16899	ENSMUSG00000086461	1	7339487	7387882
SNORA17	ENSMUSG00000077244	1	7255884	7256013
AC163389.1	ENSMUSG00000076135	1	8806219	8806328
AC102703.1	ENSMUSG00000076169	1	8578696	8578805
Gm7493	ENSMUSG00000066693	1	8953077	8953702
Cspp1	ENSMUSG00000056763	1	10028299	10126849
Arfgef1	ENSMUSG00000067851	1	10127652	10222751
Cpa6	ENSMUSG00000042501	1	10314801	10710026
Prex2	ENSMUSG00000048960	1	10983546	11293763
A830018L16Rik	ENSMUSG00000057715	1	11404186	11965982
Gm15604	ENSMUSG00000083422	1	10544179	10545634
Gm15603	ENSMUSG00000081417	1	10685204	10685695
7SK	ENSMUSG00000088153	1	10156620	10156859
SNORA66	ENSMUSG00000088585	1	10911751	10911841
U6	ENSMUSG00000065035	1	10545635	10545741
SNORA40	ENSMUSG00000077318	1	11124192	11124319
Sulf1	ENSMUSG00000016918	1	12708626	12850452
Slco5a1	ENSMUSG00000025938	1	12856630	12981258
Prdm14	ENSMUSG00000042414	1	13103538	13117244
Ncoa2	ENSMUSG00000005886	1	13129186	13364164
Tram1	ENSMUSG00000025935	1	13554783	13579945
Lactb2	ENSMUSG00000025937	1	13614926	13650627
Xkr9	ENSMUSG00000067813	1	13658852	13691804
Gm17644	ENSMUSG00000066918	1	12657644	12663171
7SK	ENSMUSG00000089358	1	13922459	13922766
U6	ENSMUSG00000087782	1	13324579	13324690
SNORA17	ENSMUSG00000077368	1	13764415	13764545
U6	ENSMUSG00000064969	1	12365017	12365123
Eya1	ENSMUSG00000025932	1	14159035	14300281
AC156988.1	ENSMUSG00000093057	1	14172659	14172758
Lancl1	ENSMUSG00000026000	1	67047091	67085446
Cps1	ENSMUSG00000025991	1	67169600	67277833
Erbb4	ENSMUSG00000062209	1	68078760	69154633
Gm15668	ENSMUSG00000086204	1	67295774	67370183
Kif22-ps	ENSMUSG00000082473	1	67631627	67633610
Gm15669	ENSMUSG00000085075	1	67839055	67851898
Gm15671	ENSMUSG00000087329	1	68051660	68072470
Gm15670	ENSMUSG00000083795	1	68339854	68340300
AC101833.1	ENSMUSG00000093213	1	68020250	68020351
AC101752.1	ENSMUSG00000093566	1	67663549	67663626
SNORA17	ENSMUSG00000077745	1	67303798	67303926
U6atac	ENSMUSG00000080539	1	68431516	68431609
Gm16076	ENSMUSG00000087514	1	69138487	69153314
Gm8840	ENSMUSG00000084332	1	69177488	69177873
Ikzf2	ENSMUSG00000025997	1	69577788	69732534
Spag16	ENSMUSG00000053153	1	69873562	70771706
7SK	ENSMUSG00000089345	1	69968047	69968321
Upp2	ENSMUSG00000026839	2	58419709	58645382
Ccdc148	ENSMUSG00000036641	2	58674108	58998740
Gm11099	ENSMUSG00000079353	2	58759370	58760029
Pkp4	ENSMUSG00000026991	2	58998907	59193265
Dapl1	ENSMUSG00000026989	2	59322710	59343077
Tanc1	ENSMUSG00000035168	2	59450099	59684206
Wdsub1	ENSMUSG00000026988	2	59690421	59720648
Baz2b	ENSMUSG00000026987	2	59737420	60047896
March7	ENSMUSG00000026977	2	60047944	60088733
Cd302	ENSMUSG00000060703	2	60090050	60122545
Ly75	ENSMUSG00000026980	2	60130160	60221360
Pla2r1	ENSMUSG00000054580	2	60255600	60391365
Itgb6	ENSMUSG00000026971	2	60436349	60560700
Gm13558	ENSMUSG00000086129	2	58558180	58587807
Gm13559	ENSMUSG00000080985	2	58593050	58593912
Gm13560	ENSMUSG00000082800	2	58746451	58746779
Gm13557	ENSMUSG00000082989	2	58811086	58812118
Gm13550	ENSMUSG00000084250	2	58986156	58986680
5330411J11Rik	ENSMUSG00000087455	2	59220559	59225528
Gm13551	ENSMUSG00000083276	2	59234545	59234974
Gm13549	ENSMUSG00000080982	2	59237043	59237838
Gm13552	ENSMUSG00000081157	2	59402325	59402741
Gm13574	ENSMUSG00000081236	2	59830008	59830401
Gm13572	ENSMUSG00000085975	2	59875198	59876894
Gm13570	ENSMUSG00000087181	2	59936439	59936771
Gm13620	ENSMUSG00000086603	2	59963153	59963876
Ldha-ps	ENSMUSG00000082330	2	59972112	59973106
Gm13573	ENSMUSG00000080198	2	60113001	60113631
Gm13571	ENSMUSG00000086196	2	60176245	60209291
Gm13580	ENSMUSG00000087283	2	60249582	60250636
Gm13583	ENSMUSG00000086578	2	60388814	60391980
Gm13566	ENSMUSG00000084115	2	60415594	60416735
Gm13567	ENSMUSG00000083195	2	60434105	60434351
AL929160.1	ENSMUSG00000080602	2	59654032	59654121
Rbms1	ENSMUSG00000026970	2	60588250	60801261
AL928581.1	ENSMUSG00000080547	2	60792117	60792190
Gm13582	ENSMUSG00000075325	2	60802433	60813208
Gm13579	ENSMUSG00000083334	2	60868408	60869027
Gm9791	ENSMUSG00000044434	3	33903939	33904385
Sox2ot	ENSMUSG00000090828	3	34003360	34581541
Gm5708	ENSMUSG00000092249	3	34082229	34083114
Gm20446	ENSMUSG00000092196	3	34197440	34221211
Gm20514	ENSMUSG00000092355	3	34223741	34250637
Gm20515	ENSMUSG00000092242	3	34326295	34334019
Ttc14	ENSMUSG00000027677	3	33698877	33713782
Ccdc39	ENSMUSG00000027676	3	33711284	33743232
Fxr1	ENSMUSG00000027680	3	33919001	33968264
Dnajc19	ENSMUSG00000027679	3	33954942	33980243
Sox2	ENSMUSG00000074637	3	34548927	34551383
SNORA17	ENSMUSG00000077559	3	33857991	33858122
Mir1897	ENSMUSG00000084530	3	34537386	34537464
AC158547.1	ENSMUSG00000093499	3	35224536	35224627
AC137708.1	ENSMUSG00000093307	3	34489443	34489530
Gm12488	ENSMUSG00000082000	3	100759364	100759862
Gm12486	ENSMUSG00000082415	3	101010782	101011322
Tpt1-ps1	ENSMUSG00000083546	3	101037383	101037818
Gm12490	ENSMUSG00000081569	3	101064840	101065399
Gm16160	ENSMUSG00000089916	3	102007879	102010189
2410057H14Rik	ENSMUSG00000086745	3	102524154	102539340
Vangl1	ENSMUSG00000027860	3	101960624	102008616
Ngf	ENSMUSG00000027859	3	102273851	102324936
Tspan2	ENSMUSG00000027858	3	102538452	102576215
Tshb	ENSMUSG00000027857	3	102581321	102586637
Sycp1	ENSMUSG00000027855	3	102622422	102740023
Mab21l3	ENSMUSG00000044313	3	101616999	101652882
Ttf2	ENSMUSG00000033222	3	100742783	100773586
Cd101	ENSMUSG00000086564	3	100797453	100833479
Ptgfrn	ENSMUSG00000027864	3	100844155	100914201
Cd2	ENSMUSG00000027863	3	101079822	101091862
Gm10355	ENSMUSG00000072381	3	101110484	101111002
Igsf3	ENSMUSG00000042035	3	101181048	101266983
Atp1a1	ENSMUSG00000033161	3	101380142	101408586
Slc22a15	ENSMUSG00000033147	3	101659701	101728376
Nhlh2	ENSMUSG00000048540	3	101814068	101819415
Casq2	ENSMUSG00000027861	3	101890338	101950437
Vtcn1	ENSMUSG00000051076	3	100629382	100699602
Trim45	ENSMUSG00000033233	3	100726125	100740848
Rwdd3	ENSMUSG00000028133	3	120858318	120874613
Tmem56	ENSMUSG00000028132	3	120904679	120986016
Alg14	ENSMUSG00000039887	3	120994735	121064929
Cnn3	ENSMUSG00000053931	3	121129459	121161123
Slc44a3	ENSMUSG00000039865	3	121162447	121235262
A730020M07Rik	ENSMUSG00000044522	3	121340063	121346403
4930432M17Rik	ENSMUSG00000074248	3	121374235	121385753
F3	ENSMUSG00000028128	3	121426455	121437970
Abcd3	ENSMUSG00000028127	3	121461827	121518220
Gm17676	ENSMUSG00000091716	3	121499382	121499550
Arhgap29	ENSMUSG00000039831	3	121656147	121719595
Abca4	ENSMUSG00000028125	3	121747361	121882979
Gm16078	ENSMUSG00000084912	3	121757668	121758466
A530020G20Rik	ENSMUSG00000086471	3	121234529	121238356
AC110195.1	ENSMUSG00000093177	3	120933178	120933248
U6	ENSMUSG00000065684	3	120020802	120020907
SNORA17	ENSMUSG00000089027	3	120312884	120313011
7SK	ENSMUSG00000084674	3	121040610	121040877
Gm4609	ENSMUSG00000078592	3	121933113	121934114
Gclm	ENSMUSG00000028124	3	121948475	121972902
Dnttip2	ENSMUSG00000039756	3	121977332	121988187
RP23-71G16.1	ENSMUSG00000093392	3	121959646	121960137
Gm17494	ENSMUSG00000057359	3	121960009	121996465
Mir760	ENSMUSG00000076456	3	121996503	121996621
AC134918.1	ENSMUSG00000092934	3	121935453	121935554
Rnf19b	ENSMUSG00000028793	4	128735515	128763130
Tmem54	ENSMUSG00000028786	4	128782792	128788870
Hpca	ENSMUSG00000028785	4	128788814	128799280
Fndc5	ENSMUSG00000001334	4	128814243	128821837
S100pbp	ENSMUSG00000040928	4	128825249	128866971
Yars	ENSMUSG00000028811	4	128867004	128896851
C77080	ENSMUSG00000050390	4	128896822	128938648
Sync	ENSMUSG00000001333	4	128964861	128985803
Rbbp4	ENSMUSG00000057236	4	128984344	129012614
Zbtb8os	ENSMUSG00000057572	4	129012939	129031791
Zbtb8a	ENSMUSG00000028807	4	129030872	129055360
Zbtb8b	ENSMUSG00000048485	4	129103009	129118097
Bsdc1	ENSMUSG00000040859	4	129138825	129165742
Tssk3	ENSMUSG00000000411	4	129166258	129168266
1700125D06Rik	ENSMUSG00000078554	4	129168434	129169200
Marcksl1	ENSMUSG00000047945	4	129190825	129193229
Hdac1	ENSMUSG00000028800	4	129193348	129219957
Lck	ENSMUSG00000000409	4	129225588	129250885
Fam167b	ENSMUSG00000050493	4	129254059	129255793
Eif3i	ENSMUSG00000028798	4	129269204	129277892
2510006D16Rik	ENSMUSG00000028797	4	129277912	129301303
Dcdc2b	ENSMUSG00000078552	4	129285773	129291498
Iqcc	ENSMUSG00000040795	4	129292370	129296343
Ccdc28b	ENSMUSG00000028795	4	129296518	129301191
Txlna	ENSMUSG00000053841	4	129303327	129318309
Kpna6	ENSMUSG00000003731	4	129321224	129350011
Tmem39b	ENSMUSG00000053730	4	129353599	129374082
Khdrbs1	ENSMUSG00000028790	4	129380408	129419547
Ptp4a2	ENSMUSG00000028788	4	129488463	129527247
Spocd1	ENSMUSG00000028784	4	129624791	129634359
Bai2	ENSMUSG00000028782	4	129662114	129699877
Col16a1	ENSMUSG00000040690	4	129725084	129776527
Pef1	ENSMUSG00000028779	4	129779802	129805379
Hcrtr1	ENSMUSG00000028778	4	129807461	129816603
Tinagl1	ENSMUSG00000028776	4	129841698	129852366
Gm853	ENSMUSG00000023120	4	129886353	129899645
Serinc2	ENSMUSG00000023232	4	129930739	129956449
Gm10570	ENSMUSG00000073752	4	129985406	129985918
Fabp3	ENSMUSG00000028773	4	129985839	129992707
Zcchc17	ENSMUSG00000028772	4	129992627	130037190
Snrnp40	ENSMUSG00000074088	4	130037379	130067274
Nkain1	ENSMUSG00000078532	4	130125705	130169623
Pum1	ENSMUSG00000028580	4	130219236	130337479
Sdc3	ENSMUSG00000025743	4	130348452	130382234
Laptm5	ENSMUSG00000028581	4	130469040	130492056
Matn1	ENSMUSG00000040533	4	130500300	130511390
1700086P04Rik	ENSMUSG00000085085	4	128727341	128735227
Gm15906	ENSMUSG00000087416	4	128812335	128814154
Gm12976	ENSMUSG00000087575	4	128939209	128942254
Gm12980	ENSMUSG00000082468	4	129057088	129057423
Gm12979	ENSMUSG00000086336	4	129169213	129186990
Gm12965	ENSMUSG00000086797	4	129300855	129301336
Gm12967	ENSMUSG00000080944	4	129438872	129439160
Gm10571	ENSMUSG00000073753	4	129532315	129533954
Gm12966	ENSMUSG00000070729	4	129576337	129577146
E330017L17Rik	ENSMUSG00000086369	4	129583460	129597031
1700003M07Rik	ENSMUSG00000085389	4	129637618	129640901
Gm12963	ENSMUSG00000085517	4	129701500	129725018
Gm12971	ENSMUSG00000087449	4	130314478	130318294
Gm12972	ENSMUSG00000086548	4	130341984	130343770
Gm12970	ENSMUSG00000087451	4	130367532	130368241
Gm12973	ENSMUSG00000085804	4	130530705	130557254
A930031H19Rik	ENSMUSG00000086262	4	130556747	130566389
Gm17525	ENSMUSG00000091673	4	128986325	128995687
Gm17328	ENSMUSG00000091343	4	130330732	130335161
snoU13	ENSMUSG00000088921	4	128896701	128896788
U1	ENSMUSG00000064613	4	129135595	129135734
SNORA17	ENSMUSG00000077381	4	130413666	130413795
SNORD103	ENSMUSG00000065790	4	130331656	130331738
U1	ENSMUSG00000065768	4	129572817	129572968
Snord85	ENSMUSG00000065196	4	130305549	130305621
AL607123.1	ENSMUSG00000093163	4	128960109	128960190
SNORD103	ENSMUSG00000064484	4	130322246	130322328
4930455G09Rik	ENSMUSG00000085761	4	141573813	141584911
Gm13053	ENSMUSG00000085574	4	141598827	141604493
Padi3	ENSMUSG00000025328	4	140341280	140366563
Padi1	ENSMUSG00000025329	4	140368898	140401693
Padi2	ENSMUSG00000028927	4	140462259	140508501
Sdhb	ENSMUSG00000009863	4	140517118	140535108
Atp13a2	ENSMUSG00000036622	4	140542788	140563245
Mfap2	ENSMUSG00000060572	4	140566333	140571899
Crocc	ENSMUSG00000040860	4	140572552	140616465
Necap2	ENSMUSG00000028923	4	140622427	140634272
Spata21	ENSMUSG00000045004	4	140644248	140668675
D4Ertd22e	ENSMUSG00000040842	4	140668916	140695690
Fbxo42	ENSMUSG00000028920	4	140703828	140759977
6330545A04Rik	ENSMUSG00000073733	4	140769871	140782671
C630004L07Rik	ENSMUSG00000091674	4	140794100	140795368
Arhgef19	ENSMUSG00000028919	4	140795490	140813479
Epha2	ENSMUSG00000006445	4	140857155	140885299
Fam131c	ENSMUSG00000006218	4	140924135	140940090
Clcnka	ENSMUSG00000033770	4	140940525	140954639
Clcnkb	ENSMUSG00000006216	4	140960268	140971929
Hspb7	ENSMUSG00000006221	4	140976694	140981226
Gm694	ENSMUSG00000070637	4	140988587	140992020
Zbtb17	ENSMUSG00000006215	4	141000569	141023845
Spen	ENSMUSG00000040761	4	141023805	141094512
Fblim1	ENSMUSG00000006219	4	141131977	141162011
Gm13027	ENSMUSG00000085968	4	139687792	139689266
Gm13029	ENSMUSG00000086164	4	139698788	139700548
Gm13016	ENSMUSG00000087084	4	139936545	139941489
Gm13017	ENSMUSG00000086960	4	139947063	139952519
Gm13021	ENSMUSG00000086437	4	139980559	139987846
Gm13026	ENSMUSG00000085047	4	139993878	140017206
Gm13025	ENSMUSG00000086159	4	140235668	140240532
Gm13032	ENSMUSG00000085918	4	140366908	140373426
4930515B02Rik	ENSMUSG00000087045	4	140428608	140433970
Gm13031	ENSMUSG00000087698	4	140503581	140513817
Gm13047	ENSMUSG00000082246	4	140640779	140641593
Gm13055	ENSMUSG00000085774	4	140817677	140821931
Gm13056	ENSMUSG00000085395	4	140834354	140835709
Gm13074	ENSMUSG00000085836	4	140903729	140906768
Gm13076	ENSMUSG00000084238	4	140912803	140913006
Gm13075	ENSMUSG00000086061	4	140954744	140967106
B330016D10Rik	ENSMUSG00000048406	4	141102104	141103807
AI507597	ENSMUSG00000073731	4	141169941	141171519
1810035I16Rik	ENSMUSG00000086818	4	141400236	141402905
Gm13643	ENSMUSG00000085922	4	141441569	141453197
Gm13059	ENSMUSG00000081079	4	141532694	141533258
Gm13037	ENSMUSG00000085424	4	141538907	141542712
Gm10565	ENSMUSG00000073728	4	141639887	141644014
Tmem82	ENSMUSG00000043085	4	141169291	141174548
Slc25a34	ENSMUSG00000040740	4	141174739	141179736
Plekhm2	ENSMUSG00000028917	4	141181649	141220814
Ddi2	ENSMUSG00000078515	4	141233464	141279334
Rsc1a1	ENSMUSG00000040715	4	141239766	141241514
Agmat	ENSMUSG00000040706	4	141302587	141315178
Dnajc16	ENSMUSG00000040697	4	141316104	141346846
Casp9	ENSMUSG00000028914	4	141349527	141371891
Ctrc	ENSMUSG00000062478	4	141370877	141402274
Cela2a	ENSMUSG00000058579	4	141370877	141382075
Efhd2	ENSMUSG00000040659	4	141414057	141430835
Fhad1	ENSMUSG00000051435	4	141446353	141570997
Tmem51	ENSMUSG00000040616	4	141586907	141640219
Kazn	ENSMUSG00000040606	4	141658305	141795316
Padi6	ENSMUSG00000040935	4	140283270	140298558
Padi4	ENSMUSG00000025330	4	140301780	140330151
Igsf21	ENSMUSG00000040972	4	139582761	139802699
Gm9867	ENSMUSG00000052098	4	139876571	139879217
Arhgef10l	ENSMUSG00000040964	4	140070400	140221927
Rcc2	ENSMUSG00000040945	4	140256456	140279135
4921514A10Rik	ENSMUSG00000091088	4	140671575	140674002
AL954710.2	ENSMUSG00000093608	4	140248612	140248707
U6	ENSMUSG00000064443	4	140474599	140474714
AL670285.1	ENSMUSG00000093180	4	140902079	140902155
AL954710.1	ENSMUSG00000093071	4	140272958	140273021
Acot7	ENSMUSG00000028937	4	151552243	151645964
Thap3	ENSMUSG00000039759	4	151356748	151363106
Phf13	ENSMUSG00000047777	4	151363742	151370367
Klhl21	ENSMUSG00000073700	4	151382912	151391789
Zbtb48	ENSMUSG00000028952	4	151393883	151401780
Tas1r1	ENSMUSG00000028950	4	151402023	151412677
Nol9	ENSMUSG00000028948	4	151413430	151435603
Plekhg5	ENSMUSG00000039713	4	151446607	151489509
Tnfrsf25	ENSMUSG00000024793	4	151490043	151494228
Espn	ENSMUSG00000028943	4	151494440	151526480
Hes2	ENSMUSG00000028940	4	151532976	151536578
Rere	ENSMUSG00000039852	4	149655755	149996075
Slc45a1	ENSMUSG00000039838	4	150002681	150026283
Errfi1	ENSMUSG00000028967	4	150228028	150243001
Park7	ENSMUSG00000028964	4	150271242	150288546
Tnfrsf9	ENSMUSG00000028965	4	150288671	150320211
Uts2	ENSMUSG00000028963	4	150371206	150375919
Per3	ENSMUSG00000028957	4	150377761	150418774
Vamp3	ENSMUSG00000028955	4	150421409	150432072
Camta1	ENSMUSG00000014592	4	150433633	151235985
Gm13090	ENSMUSG00000078491	4	150463679	150465558
Dnajc11	ENSMUSG00000039768	4	151307800	151356246
Gpr153	ENSMUSG00000042804	4	151648341	151659446
Hes3	ENSMUSG00000028946	4	151660081	151665771
Icmt	ENSMUSG00000039662	4	151671336	151681230
Rnf207	ENSMUSG00000058498	4	151681128	151693102
Rpl22	ENSMUSG00000028936	4	151699851	151708180
Chd5	ENSMUSG00000005045	4	151712760	151764303
Kcnab2	ENSMUSG00000028931	4	151764851	151851980
Nphp4	ENSMUSG00000039577	4	151850815	151937292
Gm16079	ENSMUSG00000085869	4	150042357	150052901
Gm13049	ENSMUSG00000085097	4	150199842	150213684
1700045H11Rik	ENSMUSG00000078492	4	150202334	150229058
Rps15a-ps3	ENSMUSG00000084314	4	150221222	150221616
4930589P08Rik	ENSMUSG00000085593	4	150750579	150753691
Gm13077	ENSMUSG00000081544	4	151531116	151531599
Gm13096	ENSMUSG00000085724	4	151578035	151578576
Gm13645	ENSMUSG00000085179	4	151726307	151727750
Gm16333	ENSMUSG00000090057	4	151784909	151785371
Gm16334	ENSMUSG00000089757	4	151792392	151795943
U1	ENSMUSG00000064476	4	150338844	150339003
Gm10564	ENSMUSG00000073686	4	154416155	154419531
Pex10	ENSMUSG00000029047	4	154441125	154446542
Rer1	ENSMUSG00000029048	4	154448219	154460491
Morn1	ENSMUSG00000029049	4	154460686	154519614
Ski	ENSMUSG00000029050	4	154528184	154596701
2610002J02Rik	ENSMUSG00000073684	4	154623911	154630793
Prkcz	ENSMUSG00000029053	4	154634238	154735470
Gabrd	ENSMUSG00000029054	4	154759089	154772221
2010015L04Rik	ENSMUSG00000042233	4	154783299	154822053
C030017K20Rik	ENSMUSG00000078490	4	154825679	154840639
Tmem52	ENSMUSG00000023153	4	154843223	154844966
Gnb1	ENSMUSG00000029064	4	154865470	154933378
A430005L14Rik	ENSMUSG00000047613	4	153331346	153336034
Dffb	ENSMUSG00000029027	4	153338558	153349235
BC046331	ENSMUSG00000039523	4	153349303	153382841
Lrrc47	ENSMUSG00000029028	4	153385840	153395622
Ccdc27	ENSMUSG00000039492	4	153400748	153416786
Trp73	ENSMUSG00000029026	4	153430358	153514317
Wdr8	ENSMUSG00000029029	4	153516481	153542372
Tprgl	ENSMUSG00000029030	4	153531594	153534775
Megf6	ENSMUSG00000057751	4	153544839	153649822
Arhgef16	ENSMUSG00000029032	4	153652595	153675785
Prdm16	ENSMUSG00000039410	4	153690234	154010982
Actrt2	ENSMUSG00000051276	4	154040537	154041976
Ttc34	ENSMUSG00000046637	4	154230309	154241234
Mmel1	ENSMUSG00000058183	4	154243694	154269637
2810405K02Rik	ENSMUSG00000029059	4	154269613	154273244
Tnfrsf14	ENSMUSG00000042333	4	154296319	154302672
Hes5	ENSMUSG00000048001	4	154335032	154336480
Pank4	ENSMUSG00000029056	4	154338232	154355047
Plch2	ENSMUSG00000029055	4	154357224	154430893
Nadk	ENSMUSG00000029063	4	154936487	154965110
Slc35e2	ENSMUSG00000042202	4	154975525	154997449
Gm10563	ENSMUSG00000073682	4	154988522	155019608
Cdk11b	ENSMUSG00000029062	4	154998963	155024047
Gm13115	ENSMUSG00000085390	4	153281495	153282775
BC039966	ENSMUSG00000086272	4	153321742	153324612
1190007F08Rik	ENSMUSG00000078350	4	153394697	153400261
Gm13117	ENSMUSG00000080807	4	153417842	153418532
Gm13114	ENSMUSG00000082073	4	153422132	153422237
Gm13116	ENSMUSG00000087071	4	153467588	153472462
Gm13132	ENSMUSG00000081276	4	153594650	153595121
Gm13133	ENSMUSG00000086565	4	153924391	153931754
Gm13134	ENSMUSG00000084987	4	153975306	153978311
Gm13111	ENSMUSG00000085069	4	154011685	154018825
Gm13110	ENSMUSG00000086810	4	154019863	154029427
Gm13113	ENSMUSG00000087012	4	154211568	154213384
Gm13112	ENSMUSG00000087437	4	154238615	154246112
Gm20421	ENSMUSG00000092483	4	154334879	154335787
5830444B04Rik	ENSMUSG00000084803	4	154772872	154795813
Gm13171	ENSMUSG00000082429	4	154876425	154876815
Gm16023	ENSMUSG00000086682	4	154982409	154998864
Gm16024	ENSMUSG00000085063	4	154990518	154990896
AL627405.1	ENSMUSG00000093431	4	155004113	155004183
SNORA17	ENSMUSG00000077519	4	153250493	153250624
SNORA48	ENSMUSG00000088774	4	153508139	153508282
Mmp23	ENSMUSG00000029061	4	155024764	155027493
Mib2	ENSMUSG00000029060	4	155028786	155043307
B930041F14Rik	ENSMUSG00000074738	4	155068451	155070590
B930041F14Rik	ENSMUSG00000091921	4	155068451	155070590
Ssu72	ENSMUSG00000029038	4	155078909	155107988
U6	ENSMUSG00000064916	4	155094149	155094250
1500002C15Rik	ENSMUSG00000073681	4	155107973	155108359
Gm5151	ENSMUSG00000084845	4	155108909	155114673
Atad3a	ENSMUSG00000029036	4	155114750	155135207
2610204G22Rik	ENSMUSG00000054514	4	155135287	155143373
Gm17585	ENSMUSG00000090418	4	155144078	155150270
Vwa1	ENSMUSG00000042116	4	155142258	155148807
Lrrc28	ENSMUSG00000030556	7	74658297	74790122
Ttc23	ENSMUSG00000030555	7	74792296	74871462
Synm	ENSMUSG00000030554	7	74875047	74904628
Lysmd4	ENSMUSG00000043831	7	74367494	74373342
Mef2a	ENSMUSG00000030557	7	74376049	74517744
Gm10974	ENSMUSG00000078677	7	73510791	73531195
Aldh1a3	ENSMUSG00000015134	7	73535778	73572403
Asb7	ENSMUSG00000030509	7	73789451	73834482
Lins	ENSMUSG00000053091	7	73834775	73862140
1700112J16Rik	ENSMUSG00000086357	7	74348968	74367344
4833412C05Rik	ENSMUSG00000085850	7	74929611	74948382
Lass3	ENSMUSG00000030510	7	73888390	73968579
Adamts17	ENSMUSG00000058145	7	73984621	74297511
Gm16157	ENSMUSG00000086628	7	75411225	75421480
Fam169b	ENSMUSG00000074071	7	75418725	75507975
Gm16158	ENSMUSG00000086410	7	75483554	75498087
Lrrk1	ENSMUSG00000015133	7	73371798	73533236
Igf1r	ENSMUSG00000005533	7	75097713	75371484
Pgpep1l	ENSMUSG00000030553	7	75381494	75409119
AC158296.1	ENSMUSG00000080609	7	74923296	74923416
SNORA70	ENSMUSG00000087926	7	74715453	74715589
Arrdc4	ENSMUSG00000042659	7	75881931	75894127
SNORA21	ENSMUSG00000065940	7	76096986	76097122
Gm10722	ENSMUSG00000091028	9	3000922	3002330
Gm11168	ENSMUSG00000090650	9	3004457	3005194
Gm10721	ENSMUSG00000074565	9	3013170	3014344
Gm10720	ENSMUSG00000074564	9	3015654	3017210
Gm10719	ENSMUSG00000074563	9	3017408	3019022
Gm11167	ENSMUSG00000079719	9	3020155	3021593
Gm10718	ENSMUSG00000074562	9	3023547	3025218
Gm10717	ENSMUSG00000074561	9	3025417	3026387
Gm10716	ENSMUSG00000091599	9	3030337	3031071
Gm10106	ENSMUSG00000061971	9	3032085	3032822
Gm17535	ENSMUSG00000091057	9	3034599	3035805
Gm10715	ENSMUSG00000074558	9	3037111	3038316
4930433N12Rik	ENSMUSG00000042360	9	3133847	3199782
Alkbh8	ENSMUSG00000025899	9	3335478	3387050
Cwf19l2	ENSMUSG00000025898	9	3404085	3479236
Gucy1a2	ENSMUSG00000041624	9	3532354	3897342
Aasdhppt	ENSMUSG00000025894	9	4294793	4309494
Kbtbd3	ENSMUSG00000025893	9	4309743	4331721
8430410K20Rik	ENSMUSG00000041124	9	4376612	4386861
Gria4	ENSMUSG00000025892	9	4417899	4796234
Gm16869	ENSMUSG00000087580	9	3000282	3038313
U6	ENSMUSG00000077248	9	3395439	3395542
CT030685.1	ENSMUSG00000092896	9	4455940	4456020
AC115802.1	ENSMUSG00000080511	9	4271130	4271237
SNORA24	ENSMUSG00000064956	9	3352657	3352786
CT030685.2	ENSMUSG00000092959	9	4371269	4371335
Gm15606	ENSMUSG00000087531	9	28005472	28007106
B3gat1	ENSMUSG00000045994	9	26541313	26570686
Glb1l2	ENSMUSG00000036395	9	26570629	26614053
Glb1l3	ENSMUSG00000031966	9	26625538	26668408
Gm1110	ENSMUSG00000079644	9	26687152	26730666
Acad8	ENSMUSG00000031969	9	26781720	26807151
Thyn1	ENSMUSG00000035443	9	26807262	26814915
Vps26b	ENSMUSG00000031988	9	26812088	26837679
Ncapd3	ENSMUSG00000035024	9	26837760	26902896
Jam3	ENSMUSG00000031990	9	26904969	26963003
Igsf9b	ENSMUSG00000034275	9	27106813	27142348
Spata19	ENSMUSG00000031991	9	27204406	27209295
Opcml	ENSMUSG00000062257	9	27598360	28732995
Gm10698	ENSMUSG00000079884	9	33535831	33536436
Ets1	ENSMUSG00000032035	9	32443806	32565405
Kirrel3	ENSMUSG00000032036	9	34293711	34844301
Gm17346	ENSMUSG00000091603	9	34396111	34396889
SNORA17	ENSMUSG00000088905	9	33725077	33725207
A130066N16Rik	ENSMUSG00000053889	9	34725818	34737094
5S_rRNA	ENSMUSG00000089465	9	34767604	34767733
4930581F22Rik	ENSMUSG00000070315	9	34924313	34938507
St3gal4	ENSMUSG00000032038	9	34854164	34924395
Dcps	ENSMUSG00000032040	9	34931993	34983646
Tirap	ENSMUSG00000032041	9	34992136	35007876
Srpr	ENSMUSG00000032042	9	35007760	35055558
Foxred1	ENSMUSG00000039048	9	35011791	35018640
SNORA48	ENSMUSG00000088056	9	34952221	34952364
Fam118b	ENSMUSG00000050471	9	35024550	35075390
Gm6762	ENSMUSG00000086984	9	35381221	35382248
Gm10105	ENSMUSG00000061932	9	35396663	35396935
Rpusd4	ENSMUSG00000032044	9	35075450	35085316
Gm5614	ENSMUSG00000066771	9	35089103	35089420
Cdon	ENSMUSG00000038119	9	35228713	35315236
Ddx25	ENSMUSG00000032101	9	35349433	35366055
Pus3	ENSMUSG00000032103	9	35366180	35374768
Hyls1	ENSMUSG00000050555	9	35368405	35377688
Pate2	ENSMUSG00000074452	9	35377869	35497903
Pate4	ENSMUSG00000032099	9	35414678	35419520
Gm17365	ENSMUSG00000090858	9	35453647	35455704
Gm17252	ENSMUSG00000091215	9	35492664	35494956
Gm17677	ENSMUSG00000091174	9	35548634	35549837
Gm17727	ENSMUSG00000090738	9	35584198	35585470
D730048I06Rik	ENSMUSG00000032108	9	35585618	35597697
9230110F15Rik	ENSMUSG00000047980	9	35645914	35651735
9230113P08Rik	ENSMUSG00000078934	9	35716008	35718381
U1	ENSMUSG00000065934	9	35282470	35282631
5S_rRNA	ENSMUSG00000088605	9	35311173	35311280
Gm3896	ENSMUSG00000093721	9	36823343	36828256
Gm10177	ENSMUSG00000090136	9	37060507	37060950
Tpt1-ps5	ENSMUSG00000059252	9	37504100	37504618
Gm3867	ENSMUSG00000066767	9	36064643	36065908
Gm7257	ENSMUSG00000023093	9	36239469	36242523
Gm9513	ENSMUSG00000090710	9	36283223	36284765
Gm5615	ENSMUSG00000074448	9	36339988	36349548
Gm17689	ENSMUSG00000091248	9	36388863	36390220
A630095E13Rik	ENSMUSG00000070313	9	36443340	36446187
Acrv1	ENSMUSG00000032110	9	36500805	36506422
Chek1	ENSMUSG00000032113	9	36516067	36534650
Stt3a	ENSMUSG00000032116	9	36538860	36575264
Ei24	ENSMUSG00000062762	9	36586740	36604938
Fez1	ENSMUSG00000032118	9	36629524	36686509
Pknox2	ENSMUSG00000035934	9	36697550	36954899
Tmem218	ENSMUSG00000032121	9	37015918	37030795
Slc37a2	ENSMUSG00000032122	9	37036734	37063323
Ccdc15	ENSMUSG00000034303	9	37083420	37155977
Hepacam	ENSMUSG00000046240	9	37174953	37194157
Robo4	ENSMUSG00000032125	9	37209482	37221608
Robo3	ENSMUSG00000032128	9	37223254	37240760
BC024479	ENSMUSG00000042138	9	37296906	37331733
Esam	ENSMUSG00000001946	9	37335663	37345904
Vsig2	ENSMUSG00000001943	9	37346840	37351790
Nrgn	ENSMUSG00000053310	9	37352078	37360330
Spa17	ENSMUSG00000001948	9	37410886	37421199
Siae	ENSMUSG00000001942	9	37421432	37455903
Tbrg1	ENSMUSG00000011114	9	37456767	37464897
Panx3	ENSMUSG00000011118	9	37467487	37476807
Olfr151	ENSMUSG00000061165	9	37518857	37538646
Olfr874	ENSMUSG00000063350	9	37553721	37554727
Olfr875	ENSMUSG00000058628	9	37580222	37581225
Olfr876	ENSMUSG00000066750	9	37611474	37612521
Olfr877	ENSMUSG00000066749	9	37662405	37663340
Olfr145	ENSMUSG00000066748	9	37704910	37705960
Olfr878	ENSMUSG00000066747	9	37726133	37727197
Olfr881	ENSMUSG00000060583	9	37800077	37801024
Olfr883	ENSMUSG00000062841	9	37833393	37834322
Olfr884	ENSMUSG00000058130	9	37854809	37855895
Olfr885	ENSMUSG00000057029	9	37868907	37869836
Olfr887	ENSMUSG00000059942	9	37892423	37893352
Olfr888	ENSMUSG00000059275	9	37916273	37917217
Olfr889	ENSMUSG00000062211	9	37923277	37924312
Olfr890	ENSMUSG00000061096	9	37950722	37951666
Gm16881	ENSMUSG00000085904	9	36575472	36590255
U2	ENSMUSG00000065620	9	37630171	37630369
n-R5s82	ENSMUSG00000077401	9	36833984	36834092
SNORA42	ENSMUSG00000077483	9	36980465	36980579
Olfr892-ps1	ENSMUSG00000058521	9	37997312	37998237
Olfr908	ENSMUSG00000063732	9	38323619	38324550
Olfr891	ENSMUSG00000045528	9	37987456	37988406
Olfr893	ENSMUSG00000070312	9	38016637	38017578
Olfr894	ENSMUSG00000070311	9	38026403	38027351
Olfr143	ENSMUSG00000070310	9	38061004	38061945
Olfr895	ENSMUSG00000070309	9	38076100	38077050
Olfr25	ENSMUSG00000058270	9	38137077	38138144
Olfr898	ENSMUSG00000060101	9	38156670	38157620
Olfr250	ENSMUSG00000049864	9	38175133	38176128
Olfr251	ENSMUSG00000062388	9	38185468	38186418
Olfr147	ENSMUSG00000049098	9	38209305	38211414
Olfr901	ENSMUSG00000052058	9	38237869	38238804
Olfr902	ENSMUSG00000049334	9	38256377	38257432
Olfr904	ENSMUSG00000051620	9	38271628	38272560
Olfr905	ENSMUSG00000046455	9	38280334	38281266
Olfr906	ENSMUSG00000039962	9	38295616	38296551
Olfr907	ENSMUSG00000045066	9	38306256	38307188
Olfr911-ps1	ENSMUSG00000062621	9	38331315	38332254
Olfr910	ENSMUSG00000057444	9	38345467	38347414
Olfr912	ENSMUSG00000060114	9	38387829	38389796
Olfr913	ENSMUSG00000059189	9	38400388	38402746
Olfr914	ENSMUSG00000047050	9	38414052	38415002
Olfr916	ENSMUSG00000064113	9	38465043	38465975
Olfr917	ENSMUSG00000063225	9	38472498	38473427
Olfr918	ENSMUSG00000046150	9	38480089	38481066
Olfr919	ENSMUSG00000056961	9	38505014	38505961
Vwa5a	ENSMUSG00000023186	9	38525853	38550922
Olfr920	ENSMUSG00000061039	9	38560381	38564448
Olfr921	ENSMUSG00000049926	9	38580673	38583939
Olfr922	ENSMUSG00000043911	9	38622993	38624124
Olfr923	ENSMUSG00000044798	9	38635200	38636267
Olfr924	ENSMUSG00000062103	9	38655701	38656627
Olfr26	ENSMUSG00000047667	9	38662645	38663575
Olfr926	ENSMUSG00000064333	9	38684711	38685761
Olfr930	ENSMUSG00000063221	9	38737676	38738774
Olfr933	ENSMUSG00000058515	9	38783236	38784238
Olfr934	ENSMUSG00000057424	9	38789695	38790627
Olfr935	ENSMUSG00000059595	9	38802092	38803018
Olfr146	ENSMUSG00000058820	9	38826144	38827204
Olfr937	ENSMUSG00000047724	9	38867314	38868249
Olfr938	ENSMUSG00000048501	9	38885283	38886401
Olfr27	ENSMUSG00000049708	9	38935752	38952657
Olfr943	ENSMUSG00000062149	9	38991765	38992709
Olfr944	ENSMUSG00000060905	9	39024944	39025879
Olfr1537-ps1	ENSMUSG00000063670	9	39045072	39046016
Olfr945	ENSMUSG00000063380	9	39065305	39066267
Olfr948	ENSMUSG00000057349	9	39126232	39127197
Olfr951	ENSMUSG00000060129	9	39201378	39202322
Olfr952	ENSMUSG00000058856	9	39233678	39234733
SNORA17	ENSMUSG00000077240	9	38318758	38318881
CT025680.1	ENSMUSG00000078003	9	38856143	38856234
AC073947.1	ENSMUSG00000093152	9	38882996	38883079
Olfr954	ENSMUSG00000064173	9	39269018	39269962
Olfr955	ENSMUSG00000063176	9	39277365	39278309
Olfr44	ENSMUSG00000062649	9	39291789	39301573
Olfr957	ENSMUSG00000042949	9	39318368	39319303
Olfr964-ps1	ENSMUSG00000044107	9	39493629	39494527
1700110K17Rik	ENSMUSG00000087047	9	40131011	40151149
Gm16095	ENSMUSG00000086014	9	40526989	40528069
Gm16096	ENSMUSG00000087135	9	40588825	40592264
Olfr958	ENSMUSG00000050853	9	39357513	39358454
Olfr959	ENSMUSG00000059366	9	39379845	39380899
AW551984	ENSMUSG00000038112	9	39394981	39411988
Olfr148	ENSMUSG00000048299	9	39421129	39422145
Olfr960	ENSMUSG00000059867	9	39430690	39431756
Olfr961	ENSMUSG00000059106	9	39454309	39455257
Olfr963	ENSMUSG00000064110	9	39476644	39477579
Olfr149	ENSMUSG00000062121	9	39509378	39510407
Olfr965	ENSMUSG00000055636	9	39526814	39527752
Olfr150	ENSMUSG00000058652	9	39544402	39545340
Olfr967	ENSMUSG00000055820	9	39557973	39558905
Olfr968	ENSMUSG00000058532	9	39579439	39580383
Olfr969	ENSMUSG00000063359	9	39602962	39603897
Olfr970	ENSMUSG00000063657	9	39627226	39628161
Olfr971	ENSMUSG00000061686	9	39647021	39647944
Olfr972	ENSMUSG00000058827	9	39680862	39681806
Olfr229	ENSMUSG00000060107	9	39717390	39718313
Olfr974	ENSMUSG00000051493	9	39749800	39750879
Olfr975	ENSMUSG00000043331	9	39757422	39758354
Olfr976	ENSMUSG00000047352	9	39762343	39764554
Olfr978	ENSMUSG00000044292	9	39801397	39802332
Olfr979	ENSMUSG00000059473	9	39807791	39808835
Olfr980	ENSMUSG00000060254	9	39813528	39814532
Olfr981	ENSMUSG00000046678	9	39829937	39830933
1700001J11Rik	ENSMUSG00000066639	9	39858208	39860496
Olfr982	ENSMUSG00000049010	9	39881882	39882847
Olfr983	ENSMUSG00000044205	9	39899602	39901143
Olfr984	ENSMUSG00000045812	9	39908129	39909073
Olfr985	ENSMUSG00000049073	9	39934509	39935624
Tmem225	ENSMUSG00000040541	9	39955707	39958465
Gm4893	ENSMUSG00000070308	9	39972215	39972544
Olfr986	ENSMUSG00000051095	9	39994664	39995679
Zfp202	ENSMUSG00000025602	9	39999901	40021189
Scn3b	ENSMUSG00000049281	9	40076801	40099203
Gramd1b	ENSMUSG00000040111	9	40100818	40338968
9030425E11Rik	ENSMUSG00000032024	9	40494045	40593402
Hspa8	ENSMUSG00000015656	9	40609067	40613283
Bsx	ENSMUSG00000054360	9	40682210	40686055
4931429I11Rik	ENSMUSG00000032023	9	40702932	40772201
Crtam	ENSMUSG00000032021	9	40780881	40812669
Ubash3b	ENSMUSG00000032020	9	40819181	40969780
Gm17540	ENSMUSG00000090869	9	40338740	40341205
Snord14e	ENSMUSG00000064791	9	40612831	40612920
Snord14c	ENSMUSG00000075876	9	40611666	40611751
SNORA17	ENSMUSG00000077427	9	39345411	39345537
AC136021.1	ENSMUSG00000093182	9	40010934	40011250
Snord14d	ENSMUSG00000075924	9	40612078	40612163
SNORD19	ENSMUSG00000088866	9	39406713	39406772
Gm20444	ENSMUSG00000092258	9	43915384	43917043
Gm10080	ENSMUSG00000060467	9	44182824	44183278
C030014I23Rik	ENSMUSG00000060380	9	44286007	44290263
Grik4	ENSMUSG00000032017	9	42326218	42752576
Arhgef12	ENSMUSG00000059495	9	42771925	42913801
Tmem136	ENSMUSG00000048503	9	42916736	42924653
Pou2f3	ENSMUSG00000032015	9	42930711	43018452
Oaf	ENSMUSG00000032014	9	43029361	43047899
Trim29	ENSMUSG00000032013	9	43118846	43144208
Pvrl1	ENSMUSG00000032012	9	43552659	43615537
Thy1	ENSMUSG00000032011	9	43851467	43856662
Rnf26	ENSMUSG00000053128	9	43874410	43921600
Usp2	ENSMUSG00000032010	9	43875104	43903710
Mfrp	ENSMUSG00000034739	9	43909821	43917270
C1qtnf5	ENSMUSG00000079592	9	43915328	43917270
Mcam	ENSMUSG00000032135	9	43942552	43950810
Cbl	ENSMUSG00000034342	9	43957345	44042129
Ccdc153	ENSMUSG00000070306	9	44048760	44055389
Pdzd3	ENSMUSG00000032105	9	44055395	44059547
Nlrx1	ENSMUSG00000032109	9	44060796	44076682
Abcg4	ENSMUSG00000032131	9	44081271	44096698
Hinfp	ENSMUSG00000032119	9	44103756	44113754
C2cd2l	ENSMUSG00000032120	9	44117320	44128365
Dpagt1	ENSMUSG00000032123	9	44134928	44141683
H2afx	ENSMUSG00000049932	9	44142798	44144154
Hmbs	ENSMUSG00000032126	9	44144433	44152311
Vps11	ENSMUSG00000032127	9	44156189	44169753
Hyou1	ENSMUSG00000032115	9	44187573	44200452
Slc37a4	ENSMUSG00000032114	9	44205182	44211046
Trappc4	ENSMUSG00000032112	9	44211844	44215631
Rps25	ENSMUSG00000009927	9	44215797	44218488
Ccdc84	ENSMUSG00000043923	9	44218249	44226090
Foxr1	ENSMUSG00000074397	9	44241438	44248951
Upk2	ENSMUSG00000041523	9	44260799	44262850
Gm9830	ENSMUSG00000048648	9	44272240	44273615
Bcl9l	ENSMUSG00000063382	9	44307219	44318471
Cxcr5	ENSMUSG00000047880	9	44319871	44334504
Ddx6	ENSMUSG00000032097	9	44412975	44448814
Treh	ENSMUSG00000032098	9	44481316	44494388
Ift46	ENSMUSG00000002031	9	44575991	44600797
Gm3906	ENSMUSG00000092003	9	43921006	43930030
Gm10687	ENSMUSG00000074408	9	43931851	43942568
Tmem25	ENSMUSG00000002032	9	44601858	44607390
Ttc36	ENSMUSG00000039438	9	44607483	44611034
Mll1	ENSMUSG00000002028	9	44611438	44689379
Arcn1	ENSMUSG00000032096	9	44549647	44575928
Atp5l	ENSMUSG00000038717	9	44721333	44728825
Ube4a	ENSMUSG00000059890	9	44731214	44773683
Phldb1	ENSMUSG00000048537	9	44494387	44543281
U6	ENSMUSG00000088044	9	43713981	43714085
7SK	ENSMUSG00000088028	9	44171535	44171811
U6	ENSMUSG00000088793	9	44284499	44284615
SNORA40	ENSMUSG00000088398	9	44203880	44203998
SNORA2	ENSMUSG00000064658	9	44544896	44545030
U6atac	ENSMUSG00000080358	9	44705948	44706065
Cd3g	ENSMUSG00000002033	9	44777655	44788514
Cd3d	ENSMUSG00000032094	9	44789876	44795135
Cd3e	ENSMUSG00000032093	9	44806826	44817673
Gm16234	ENSMUSG00000085572	10	14384026	14388124
Gm8355	ENSMUSG00000059814	10	14465084	14467190
Utrn	ENSMUSG00000019820	10	12101986	12589163
Stx11	ENSMUSG00000039232	10	12659787	12684065
Sf3b5	ENSMUSG00000078348	10	12728256	12728988
Plagl1	ENSMUSG00000019817	10	12810497	12851500
Fam164b	ENSMUSG00000019815	10	12869346	12897829
Ltv1	ENSMUSG00000019814	10	12898446	12912943
Phactr2	ENSMUSG00000062866	10	12933201	13194202
Fuca2	ENSMUSG00000019810	10	13219346	13238841
Pex3	ENSMUSG00000019809	10	13243648	13272948
Adat2	ENSMUSG00000019808	10	13272700	13283182
Aig1	ENSMUSG00000019806	10	13366860	13588786
Hivep2	ENSMUSG00000015501	10	13686185	13871182
Gpr126	ENSMUSG00000039116	10	14122391	14264842
Gm10335	ENSMUSG00000071532	10	14242884	14243354
Vta1	ENSMUSG00000019868	10	14374561	14425366
Gje1	ENSMUSG00000019867	10	14435429	14438020
Nmbr	ENSMUSG00000019865	10	14480027	14490389
Gm8330	ENSMUSG00000091527	10	13686830	13727211
B230208H11Rik	ENSMUSG00000085233	10	12636446	12642898
B230364G03Rik	ENSMUSG00000090645	10	14478441	14480526
U6	ENSMUSG00000064531	10	13608343	13608449
SNORA17	ENSMUSG00000089333	10	13953319	13953429
Gm6969	ENSMUSG00000066553	12	25322866	25323897
Gm9312	ENSMUSG00000092064	12	24936711	24937046
Gm16372	ENSMUSG00000057160	12	25178072	25178521
Taf1b	ENSMUSG00000059669	12	25183446	25243436
Grhl1	ENSMUSG00000020656	12	25257152	25302256
Klf11	ENSMUSG00000020653	12	25336236	25347639
Cys1	ENSMUSG00000062563	12	25350703	25366678
Rrm2	ENSMUSG00000020649	12	25393106	25399011
Mboat2	ENSMUSG00000020646	12	25516464	25645166
Kidins220	ENSMUSG00000036333	12	25659797	25746142
Id2	ENSMUSG00000020644	12	25778666	25780957
SNORA70	ENSMUSG00000089203	12	25463883	25464011
5S_rRNA	ENSMUSG00000089441	12	26372666	26372771
Rnf144a	ENSMUSG00000020642	12	26991662	27100121
Mrpl39	ENSMUSG00000022889	16	84717821	84735987
Jam2	ENSMUSG00000053062	16	84774368	84826173
Atp5j	ENSMUSG00000022890	16	84828111	84835870
Gabpa	ENSMUSG00000008976	16	84835170	84864024
App	ENSMUSG00000022892	16	84954685	85173952
Cyyr1	ENSMUSG00000041134	16	85421778	85553642
Adamts1	ENSMUSG00000022893	16	85794072	85803358
Adamts5	ENSMUSG00000022894	16	85858415	85901370
Mir155	ENSMUSG00000091875	16	84713268	84715487
Gm2541	ENSMUSG00000089698	16	85553478	85554188
7SK	ENSMUSG00000084746	16	84620052	84620373
Mir155	ENSMUSG00000065397	16	84714385	84714449
U6	ENSMUSG00000070158	16	84294780	84294886
SNORA70	ENSMUSG00000088058	16	84737595	84737721
5S_rRNA	ENSMUSG00000088249	16	84818342	84818439
Olig2	ENSMUSG00000039830	16	91225795	91228922
Olig1	ENSMUSG00000046160	16	91270014	91272184
Ifnar2	ENSMUSG00000022971	16	91373028	91405834
RP23-190G10.4	ENSMUSG00000093701	16	91391966	91419696
Il10rb	ENSMUSG00000022969	16	91406409	91426079
Ifnar1	ENSMUSG00000022967	16	91485483	91507686
Ifngr2	ENSMUSG00000022965	16	91547317	91565414
Tmem50b	ENSMUSG00000022964	16	91574748	91598045
Dnajc28	ENSMUSG00000039763	16	91614502	91619271
Gart	ENSMUSG00000022962	16	91621431	91647197
Son	ENSMUSG00000022961	16	91647751	91679466
Donson	ENSMUSG00000022960	16	91677513	91689010
Atp5o	ENSMUSG00000022956	16	91684643	91931932
Cryzl1	ENSMUSG00000058240	16	91689567	91729220
Itsn1	ENSMUSG00000022957	16	91729526	91920842
Mrps6	ENSMUSG00000039680	16	92058515	92112472
Slc5a3	ENSMUSG00000089774	16	92058567	92087718
Kcne2	ENSMUSG00000039672	16	92292634	92298374
Fam165b	ENSMUSG00000051989	16	92301531	92313286
4930563D23Rik	ENSMUSG00000051728	16	92319008	92321686
Kcne1	ENSMUSG00000039639	16	92346246	92359713
Rcan1	ENSMUSG00000022951	16	92392198	92466391
2410124H12Rik	ENSMUSG00000051297	16	92478988	92497610
Clic6	ENSMUSG00000022949	16	92485981	92541488
Runx1	ENSMUSG00000022952	16	92601712	92826311
Gm16309	ENSMUSG00000079514	16	92078307	92084053
Gm15976	ENSMUSG00000087240	16	91924683	91928880
D430001F17Rik	ENSMUSG00000087190	16	91931482	91963160
Gm16801	ENSMUSG00000086934	16	92613059	92620350
Gm16310	ENSMUSG00000086331	16	92094813	92096735
Gm15980	ENSMUSG00000085637	16	92308961	92312711
Gm15966	ENSMUSG00000085865	16	91320697	91329240
A930006K02Rik	ENSMUSG00000084866	16	91465349	91470366
Gm7856	ENSMUSG00000084301	16	91513386	91514878
Gm7860	ENSMUSG00000082535	16	91539427	91540305
Gm15964	ENSMUSG00000085337	16	91611713	91624106
Gm10785	ENSMUSG00000085169	16	91689156	91715887
U4	ENSMUSG00000065811	16	91349947	91350029
U6	ENSMUSG00000089293	16	92042922	92043019
U6	ENSMUSG00000064623	16	91921554	91921660
Mir802	ENSMUSG00000076457	16	93369965	93370061
Setd4	ENSMUSG00000022948	16	93583702	93604308
Cbr1	ENSMUSG00000051483	16	93608082	93610750
Cbr3	ENSMUSG00000022947	16	93683460	93691235
Dopey2	ENSMUSG00000022946	16	93712152	93810830
Gm5678	ENSMUSG00000082815	16	93628342	93630591
7SK	ENSMUSG00000084591	16	93654569	93654846
2310043M15Rik	ENSMUSG00000091302	16	93792395	93795133
Morc3	ENSMUSG00000039456	16	93832366	93876317
Chaf1b	ENSMUSG00000022945	16	93884146	93906360
Cldn14	ENSMUSG00000047109	16	93919276	94009082
Sim2	ENSMUSG00000062713	16	94086061	94347498
Hlcs	ENSMUSG00000040820	16	94350488	94535170
Ripply3	ENSMUSG00000022941	16	94550027	94558542
Pigp	ENSMUSG00000022940	16	94580370	94592622
Ttc3	ENSMUSG00000040785	16	94592225	94690829
Dscr3	ENSMUSG00000022898	16	94719390	94748437
Dyrk1a	ENSMUSG00000022897	16	94791617	94917124
Kcnj6	ENSMUSG00000043301	16	94970873	95219303
Gm6363	ENSMUSG00000041929	16	94463881	94464954
Gm15310	ENSMUSG00000089814	16	94580548	94580919
Gm15971	ENSMUSG00000081692	16	94841984	94842194
U1	ENSMUSG00000075829	16	94650680	94650839
CT573086.1	ENSMUSG00000076304	16	94390909	94391018
Kcnj15	ENSMUSG00000062609	16	95479165	95521867
Erg	ENSMUSG00000040732	16	95580776	95808200
Gm17496	ENSMUSG00000092023	16	95237977	95288624
AC165248.1	ENSMUSG00000093250	16	95091071	95091140
Ets2	ENSMUSG00000022895	16	95923682	95942658
Psmg1	ENSMUSG00000022913	16	96201540	96212567
Brwd1	ENSMUSG00000022914	16	96213699	96304133
Hmgn1	ENSMUSG00000040681	16	96342225	96349336
Wrb	ENSMUSG00000023147	16	96367014	96379459
Lca5l	ENSMUSG00000045275	16	96380014	96413864
Sh3bgr	ENSMUSG00000040666	16	96422077	96450540
B3galt5	ENSMUSG00000074892	16	96457408	96541466
Igsf5	ENSMUSG00000000159	16	96583275	96747187
Itgb2l	ENSMUSG00000000157	16	96643895	96665226
Pcp4	ENSMUSG00000090223	16	96689213	96747400
Dscam	ENSMUSG00000050272	16	96813686	97392359
2810404F17Rik	ENSMUSG00000085329	16	96027636	96029924
1600002D24Rik	ENSMUSG00000086899	16	96052730	96150684
Gm15340	ENSMUSG00000085903	16	96122005	96123335
Gm15342	ENSMUSG00000085884	16	96257697	96260350
1700093J21Rik	ENSMUSG00000022915	16	96304283	96310677
Gm15341	ENSMUSG00000086093	16	96320106	96335428
Gm15317	ENSMUSG00000087282	16	96367083	96369191
Bace2	ENSMUSG00000040605	16	97578335	97660619
Mx1	ENSMUSG00000000386	16	97668642	97684514
Fam3b	ENSMUSG00000022938	16	97692657	97726543
Mx2	ENSMUSG00000023341	16	97757690	97782506
Tmprss2	ENSMUSG00000000385	16	97786291	97832802
Ripk4	ENSMUSG00000005251	16	97963540	97985344
Prdm15	ENSMUSG00000014039	16	98013074	98073457
C2cd2	ENSMUSG00000045975	16	98076817	98144243
Zfp295	ENSMUSG00000046962	16	98168599	98183786
B230307C23Rik	ENSMUSG00000080717	16	98218488	98231165
C030010L15Rik	ENSMUSG00000091751	16	98215766	98218584
Gm9242	ENSMUSG00000059132	16	97711654	97712727
5S_rRNA	ENSMUSG00000088269	16	97720523	97720629
Btbd9	ENSMUSG00000062202	17	30352469	30713394
Gm9874	ENSMUSG00000052388	17	30622456	30622908
Glo1	ENSMUSG00000024026	17	30729811	30749604
Dnahc8	ENSMUSG00000033826	17	30761299	31012209
Glp1r	ENSMUSG00000024027	17	31038785	31073455
Umodl1	ENSMUSG00000054134	17	31091624	31147653
Abcg1	ENSMUSG00000024030	17	31194643	31252722
Tff3	ENSMUSG00000024029	17	31262251	31266591
Tff2	ENSMUSG00000024028	17	31277994	31281227
Tff1	ENSMUSG00000024032	17	31298341	31301998
Tmprss3	ENSMUSG00000024034	17	31316217	31335920
Ubash3a	ENSMUSG00000042345	17	31344818	31379147
Rsph1	ENSMUSG00000024033	17	31391964	31414301
Slc37a1	ENSMUSG00000024036	17	31432428	31487641
Pde9a	ENSMUSG00000041119	17	31523179	31613255
Wdr4	ENSMUSG00000024037	17	31631268	31656919
Ndufv3	ENSMUSG00000024038	17	31657060	31668266
Pknox1	ENSMUSG00000006705	17	31701694	31744625
Cbs	ENSMUSG00000024039	17	31749568	31774144
U2af1	ENSMUSG00000061613	17	31784027	31795699
Cryaa	ENSMUSG00000024041	17	31814878	31818667
Sik1	ENSMUSG00000024042	17	31981193	31992737
Hsf2bp	ENSMUSG00000002076	17	32081714	32171453
Rrp1b	ENSMUSG00000058392	17	32173045	32199810
Notch3	ENSMUSG00000038146	17	32257765	32303825
Ephx3	ENSMUSG00000037577	17	32320715	32326494
Brd4	ENSMUSG00000024002	17	32333219	32421667
Akap8	ENSMUSG00000024045	17	32440621	32458098
Akap8l	ENSMUSG00000002625	17	32458370	32487540
Wiz	ENSMUSG00000024050	17	32491000	32526384
Rasal3	ENSMUSG00000052142	17	32527604	32540528
Gm15318	ENSMUSG00000086010	17	31289697	31299997
4833413E03Rik	ENSMUSG00000013562	17	31694071	31696058
Gm17572	ENSMUSG00000091548	17	32087494	32087913
Pdxk-ps	ENSMUSG00000002791	17	32213028	32237231
Gm17276	ENSMUSG00000090984	17	32250374	32278784
Gm17549	ENSMUSG00000091543	17	32421732	32435634
Gm17561	ENSMUSG00000091872	17	32506250	32515390
5S_rRNA	ENSMUSG00000089622	17	31196549	31196676
CT485616.1	ENSMUSG00000084600	17	32525956	32526014
AC166172.1	ENSMUSG00000093323	17	31701907	31701988
U6	ENSMUSG00000089559	17	30918971	30919074
7SK	ENSMUSG00000088406	17	32164883	32165153
AC165951.1	ENSMUSG00000092731	17	31104142	31104239
Cyp21a1	ENSMUSG00000024365	17	34938293	34941506
Stk19	ENSMUSG00000061207	17	34960938	34973890
Dom3z	ENSMUSG00000040482	17	34973964	34976178
Skiv2l	ENSMUSG00000040356	17	34976173	34987155
Rdbp	ENSMUSG00000024369	17	34987336	34993317
Cfb	ENSMUSG00000090231	17	34993319	34999463
C2	ENSMUSG00000024371	17	34993357	35035210
Gm20547	ENSMUSG00000092511	17	34993357	35018987
Zbtb12	ENSMUSG00000049823	17	35016428	35033787
Ehmt2	ENSMUSG00000013787	17	35035414	35050997
Slc44a4	ENSMUSG00000007034	17	35051411	35067381
Neu1	ENSMUSG00000007038	17	35068198	35072898
Hspa1b	ENSMUSG00000090877	17	35093381	35096183
Hspa1a	ENSMUSG00000091971	17	35106144	35109069
Gm20481	ENSMUSG00000092609	17	35106857	35109081
Hspa1l	ENSMUSG00000007033	17	35109648	35116229
Lsm2	ENSMUSG00000007050	17	35118807	35122836
D17H6S56E-5	ENSMUSG00000091747	17	35133681	35138609
Vars	ENSMUSG00000007029	17	35137932	35153267
D17H6S56E-3	ENSMUSG00000007030	17	35153524	35163686
Ng23	ENSMUSG00000036185	17	35162904	35164961
Msh5	ENSMUSG00000007035	17	35165550	35183690
Clic1	ENSMUSG00000007041	17	35186911	35195694
Ddah2	ENSMUSG00000007039	17	35195980	35199040
AU023871	ENSMUSG00000073414	17	35199638	35203129
Ly6g6c	ENSMUSG00000007044	17	35202333	35206570
Ly6g6c	ENSMUSG00000092586	17	35204270	35206995
Ly6g6d	ENSMUSG00000073413	17	35208388	35215010
Ly6g6e	ENSMUSG00000013766	17	35213847	35215749
Ly6g6f	ENSMUSG00000034923	17	35217425	35222555
Abhd16a	ENSMUSG00000007036	17	35226208	35239932
Ly6g5c	ENSMUSG00000034482	17	35245224	35248936
Ly6g5b	ENSMUSG00000043807	17	35250893	35252373
Csnk2b	ENSMUSG00000024387	17	35253141	35258998
Gpank1	ENSMUSG00000092417	17	35258400	35261759
D17H6S53E	ENSMUSG00000043311	17	35263318	35265800
Apom	ENSMUSG00000024391	17	35265942	35268995
Bag6	ENSMUSG00000024392	17	35272123	35284265
Prrc2a	ENSMUSG00000024393	17	35286021	35301842
Aif1	ENSMUSG00000024397	17	35307936	35313013
Lst1	ENSMUSG00000073412	17	35322040	35325384
Ltb	ENSMUSG00000024399	17	35331384	35333265
Tnf	ENSMUSG00000024401	17	35336326	35338952
Lta	ENSMUSG00000024402	17	35340110	35342296
Nfkbil1	ENSMUSG00000042419	17	35357120	35372737
Gm16181	ENSMUSG00000081650	17	35357779	35361079
Atp6v1g2	ENSMUSG00000024403	17	35370605	35375712
Ddx39b	ENSMUSG00000019432	17	35378691	35390652
H2-D1	ENSMUSG00000073411	17	35399675	35404444
H2-Q1	ENSMUSG00000079507	17	35457350	35462044
H2-Q2	ENSMUSG00000091705	17	35479187	35483707
H2-Q4	ENSMUSG00000035929	17	35516562	35522235
H2-Q6	ENSMUSG00000073409	17	35561795	35567000
H2-Q7	ENSMUSG00000060550	17	35576100	35580714
H2-Q10	ENSMUSG00000067235	17	35607034	35611508
Pou5f1	ENSMUSG00000024406	17	35642982	35647721
Tcf19	ENSMUSG00000050410	17	35649679	35653769
Cchcr1	ENSMUSG00000040312	17	35654045	35667960
Psors1c2	ENSMUSG00000024409	17	35670146	35671592
Cdsn	ENSMUSG00000039518	17	35689073	35694125
2300002M23Rik	ENSMUSG00000039269	17	35704395	35705897
Sfta2	ENSMUSG00000090509	17	35738494	35787516
Gm9573	ENSMUSG00000090588	17	35754868	35763582
Dpcr1	ENSMUSG00000073408	17	35772697	35780640
Vars2	ENSMUSG00000038838	17	35792579	35804537
Gtf2h4	ENSMUSG00000001524	17	35804675	35810684
Ddr1	ENSMUSG00000003534	17	35818512	35841566
Ier3	ENSMUSG00000003541	17	35958629	35959868
Flot1	ENSMUSG00000059714	17	35960175	35969736
Tubb5	ENSMUSG00000001525	17	35970871	35975251
Mdc1	ENSMUSG00000061607	17	35978460	35996615
Nrm	ENSMUSG00000059791	17	35998263	36002347
Ppp1r18	ENSMUSG00000034595	17	36002538	36012541
Dhx16	ENSMUSG00000024422	17	36016764	36029615
2310061I04Rik	ENSMUSG00000050705	17	36029622	36034376
Atat1	ENSMUSG00000024426	17	36034540	36047020
Mrps18b	ENSMUSG00000024436	17	36047324	36053334
Ppp1r10	ENSMUSG00000039220	17	36053379	36069226
Abcf1	ENSMUSG00000038762	17	36093764	36106706
Prr3	ENSMUSG00000038500	17	36109486	36117181
Gnl1	ENSMUSG00000024429	17	36116796	36126407
Gm20508	ENSMUSG00000092604	17	36128812	36130683
H2-T24	ENSMUSG00000053835	17	36142640	36157505
Gm17579	ENSMUSG00000092126	17	36150382	36156101
H2-T23	ENSMUSG00000067212	17	36166718	36169800
H2-T22	ENSMUSG00000056116	17	36174073	36179692
Gm6034	ENSMUSG00000073407	17	36179906	36195590
Gm11127	ENSMUSG00000079492	17	36192761	36195316
H2-Bl	ENSMUSG00000073406	17	36201920	36221168
H2-T10	ENSMUSG00000079491	17	36252821	36258410
Gm19684	ENSMUSG00000092277	17	36258623	36266637
Gm7030	ENSMUSG00000092243	17	36264424	36266370
2410017I17Rik	ENSMUSG00000038311	17	36281963	36299518
Gm8909	ENSMUSG00000073402	17	36301388	36305482
Gm8909	ENSMUSG00000092478	17	36301389	36305482
H2-T3	ENSMUSG00000054128	17	36322517	36327232
Rpp21	ENSMUSG00000024446	17	36392590	36395014
Trim39	ENSMUSG00000045409	17	36395818	36409192
H2-M10.2	ENSMUSG00000023083	17	36421172	36423435
H2-M10.1	ENSMUSG00000024448	17	36459803	36463100
H2-M10.3	ENSMUSG00000058124	17	36501949	36505362
H2-M10.4	ENSMUSG00000048231	17	36595862	36599279
H2-M11	ENSMUSG00000037537	17	36684020	36686195
H2-M9	ENSMUSG00000067201	17	36776230	36779611
H2-M1	ENSMUSG00000037334	17	36806953	36809164
Gm4256	ENSMUSG00000092508	17	36544384	36546494
Gm8752	ENSMUSG00000092278	17	35582801	35585871
Gm18734	ENSMUSG00000092438	17	35441151	35443262
Gm8741	ENSMUSG00000091655	17	35472854	35473240
H2-Q3	ENSMUSG00000092253	17	35495934	35496917
Gm11131	ENSMUSG00000079505	17	35513966	35517237
H2-Q5	ENSMUSG00000055413	17	35531071	35534971
CT025759.1	ENSMUSG00000093620	17	34993518	34999057
1110038B12Rik	ENSMUSG00000092203	17	35087183	35089416
Gm9612	ENSMUSG00000092231	17	36572848	36573215
Gm5227	ENSMUSG00000092437	17	36581122	36581694
Gm4830	ENSMUSG00000044538	17	36589239	36590198
Gm20452	ENSMUSG00000092290	17	36637305	36638526
Gm20451	ENSMUSG00000092493	17	36644125	36645897
Gm20454	ENSMUSG00000092296	17	36671226	36671446
Gm20453	ENSMUSG00000092414	17	36682833	36683058
Gm8868	ENSMUSG00000092332	17	36695566	36698613
Gm20450	ENSMUSG00000092606	17	36734843	36734989
Rpl9-ps5	ENSMUSG00000092485	17	36794001	36794571
Gm8877	ENSMUSG00000092298	17	36838574	36840154
Gm20549	ENSMUSG00000092377	17	36840720	36841148
Gm20523	ENSMUSG00000092172	17	36842669	36843792
Gm20525	ENSMUSG00000092343	17	36860179	36860226
Gm20526	ENSMUSG00000092435	17	36860893	36861220
Gm4271	ENSMUSG00000092521	17	36869940	36871453
Gm20401	ENSMUSG00000092385	17	36889458	36890924
Gm4252	ENSMUSG00000092502	17	36385581	36385893
Gm20546	ENSMUSG00000092392	17	36385766	36390624
Gm6633	ENSMUSG00000092317	17	36389062	36389331
Gm318	ENSMUSG00000092555	17	36534389	36535462
Gm8696	ENSMUSG00000092557	17	35091273	35091657
Gm10501	ENSMUSG00000073415	17	35113844	35118733
Gm20522	ENSMUSG00000092241	17	35259683	35263385
Gm17705	ENSMUSG00000090936	17	35302064	35304131
Ncr3-ps	ENSMUSG00000086076	17	35317480	35321607
Gm18733	ENSMUSG00000092444	17	35415121	35416359
Skiv2l-ps1	ENSMUSG00000092543	17	34906778	34908173
Tnxa	ENSMUSG00000092200	17	34908340	34938568
C4a	ENSMUSG00000015451	17	34946037	34960409
Gm20527	ENSMUSG00000092198	17	35602400	35603427
Gm20419	ENSMUSG00000092215	17	35617084	35617673
Gm19553	ENSMUSG00000093516	17	35646022	35647496
Gm9613	ENSMUSG00000092409	17	35698868	35699063
Gm20483	ENSMUSG00000092389	17	35788773	35789256
Gm4577	ENSMUSG00000086867	17	35840841	35845189
Gm20443	ENSMUSG00000092219	17	35874679	35876751
Gm20442	ENSMUSG00000092600	17	35880268	35901136
4833427F10Rik	ENSMUSG00000092171	17	35909395	35917632
5530401N12Rik	ENSMUSG00000087443	17	35997863	36003831
Gm16279	ENSMUSG00000084998	17	36033891	36049160
Gm9840	ENSMUSG00000049832	17	36072526	36072895
Gm8801	ENSMUSG00000092284	17	36084191	36089242
A930015D03Rik	ENSMUSG00000092368	17	36131398	36175380
A930015D03Rik	ENSMUSG00000092254	17	36131449	36175386
Gm17414	ENSMUSG00000078821	17	36131461	36136694
BC023719	ENSMUSG00000092365	17	36169365	36254066
Gm8810	ENSMUSG00000091373	17	36203053	36204709
Gm20530	ENSMUSG00000092304	17	36231126	36231708
Gm8815	ENSMUSG00000092224	17	36231913	36233750
C920025E04Rik	ENSMUSG00000073405	17	36245531	36248633
Gm9574	ENSMUSG00000073980	17	36273812	36275385
Gm9574	ENSMUSG00000092630	17	36275542	36275788
Gm10499	ENSMUSG00000073403	17	36278703	36282868
Gm17782	ENSMUSG00000092366	17	36293478	36293754
Gm6659	ENSMUSG00000092289	17	36294933	36295479
Gm20478	ENSMUSG00000092474	17	36304927	36308750
Gm6623	ENSMUSG00000092374	17	36316059	36316602
Gm20495	ENSMUSG00000092480	17	36319141	36319375
Gm4246	ENSMUSG00000092240	17	36331541	36331756
Gm20447	ENSMUSG00000092306	17	36334597	36335449
Gm8835	ENSMUSG00000092457	17	36339294	36343268
Gm5682	ENSMUSG00000092265	17	36347640	36362177
Gm20392	ENSMUSG00000092362	17	36352500	36353001
Gm10074	ENSMUSG00000060087	17	36362945	36363219
Gm20545	ENSMUSG00000092428	17	36363760	36363969
Gm18604	ENSMUSG00000092612	17	36365871	36366703
Gm20391	ENSMUSG00000092363	17	36374199	36374304
Gm8750	ENSMUSG00000092560	17	35537744	35540672
7SK	ENSMUSG00000084750	17	36378734	36379051
SNORD83	ENSMUSG00000075770	17	35379623	35379699
Mir1894	ENSMUSG00000084751	17	36054834	36054914
AC087117.2	ENSMUSG00000092687	17	35088958	35089020
SNORA38	ENSMUSG00000064853	17	35299508	35299641
SNORD83	ENSMUSG00000065273	17	35384120	35384195
AC087117.1	ENSMUSG00000092678	17	35089185	35089254
U6	ENSMUSG00000065774	17	35836148	35836254
Snord52	ENSMUSG00000093009	17	35087897	35087962
U6	ENSMUSG00000065139	17	35186163	35186266
CR974466.1	ENSMUSG00000077807	17	35390896	35390984
Mir877	ENSMUSG00000077931	17	36097675	36097759
Gm8878	ENSMUSG00000092460	17	36896802	36899368
Pgk2	ENSMUSG00000031233	17	40343963	40345554
Crisp3	ENSMUSG00000025433	17	40358726	40456126
Crisp1	ENSMUSG00000025431	17	40430707	40456156
Gm17495	ENSMUSG00000090747	17	40656971	40667369
Gm5494	ENSMUSG00000090897	17	40698456	40716498
Gm5494	ENSMUSG00000092043	17	40698456	40702571
Gm6084	ENSMUSG00000073396	17	40864069	40868731
Crisp2	ENSMUSG00000023930	17	40901683	40943952
Rhag	ENSMUSG00000023926	17	40948075	40977703
9130008F23Rik	ENSMUSG00000054951	17	41012431	41017507
Glyatl3	ENSMUSG00000091043	17	41041690	41051299
Cenpq	ENSMUSG00000023919	17	41060000	41071996
Mut	ENSMUSG00000023921	17	41071656	41098582
Gm7148	ENSMUSG00000045842	17	40252301	40253014
U1	ENSMUSG00000088473	17	41054489	41054636
3110082D06Rik	ENSMUSG00000042256	17	42452896	42644690
Opn5	ENSMUSG00000043972	17	42693732	42748262
Gpr115	ENSMUSG00000023918	17	42793840	42829233
Gpr111	ENSMUSG00000057899	17	42845885	42879128
Cd2ap	ENSMUSG00000061665	17	42929900	43013373
Tnfrsf21	ENSMUSG00000023915	17	43153504	43226137
Gpr110	ENSMUSG00000041293	17	43407278	43461686
Gpr116	ENSMUSG00000056492	17	43526415	43596506
Mep1a	ENSMUSG00000023914	17	43611273	43639761
Pla2g7	ENSMUSG00000023913	17	43705047	43749150
Tdrd6	ENSMUSG00000040140	17	43752284	43767248
Slc25a27	ENSMUSG00000023912	17	43778849	43804125
Cyp39a1	ENSMUSG00000023963	17	43804374	43888380
1700071M16Rik	ENSMUSG00000090307	17	43725289	43729391
U4	ENSMUSG00000064582	17	43591204	43591346
Rcan2	ENSMUSG00000039601	17	43938800	44176465
U2	ENSMUSG00000084474	17	43835312	43835501
Enpp5	ENSMUSG00000023960	17	44215762	44223516
Enpp4	ENSMUSG00000023961	17	44233257	44242758
Clic5	ENSMUSG00000023959	17	44325521	44417117
Runx2	ENSMUSG00000039153	17	44632936	44951746
Runx2	ENSMUSG00000092206	17	44744480	44951746
Gm16317	ENSMUSG00000090048	17	44698939	44700121
7SK	ENSMUSG00000088576	17	44098505	44098790
n-R5s27	ENSMUSG00000070209	17	44777974	44778092
Supt3h	ENSMUSG00000038954	17	44914101	45256239
9530072K05Rik	ENSMUSG00000089849	17	44847171	44850874
Gm10497	ENSMUSG00000073394	17	44872794	44874561
Gm4766	ENSMUSG00000044887	17	45300176	45301117
Ttbk1	ENSMUSG00000015599	17	46579397	46624624
BC048355	ENSMUSG00000040658	17	46633738	46636567
Cul9	ENSMUSG00000040327	17	46637554	46683337
Srf	ENSMUSG00000015605	17	46683788	46693111
Ptk7	ENSMUSG00000023972	17	46701400	46766453
Klc4	ENSMUSG00000003546	17	46767574	46782104
Mrpl2	ENSMUSG00000002767	17	46783178	46787088
Cul7	ENSMUSG00000038545	17	46787286	46801313
Rrp36	ENSMUSG00000023971	17	46804407	46811236
Klhdc3	ENSMUSG00000063576	17	46811499	46817879
Mea1	ENSMUSG00000002768	17	46818086	46820054
Ppp2r5d	ENSMUSG00000059409	17	46819940	46841951
Pex6	ENSMUSG00000002763	17	46848412	46862490
Gnmt	ENSMUSG00000002769	17	46862613	46866117
Cnpy3	ENSMUSG00000023973	17	46872654	46889163
2310039H08Rik	ENSMUSG00000062619	17	46909584	46910356
Rpl7l1	ENSMUSG00000063888	17	46910856	46919605
BC032203	ENSMUSG00000036568	17	46935065	46968362
A330017A19Rik	ENSMUSG00000073388	17	47026165	47027354
Tbcc	ENSMUSG00000036430	17	47027570	47029412
Prph2	ENSMUSG00000023978	17	47047408	47061882
Ubr2	ENSMUSG00000023977	17	47065241	47147481
Gm16494	ENSMUSG00000091775	17	47153645	47153905
Gm4945	ENSMUSG00000062472	17	47179533	47179988
Trerf1	ENSMUSG00000064043	17	47277891	47496407
Mrps10	ENSMUSG00000034729	17	47505836	47518366
Guca1b	ENSMUSG00000023979	17	47522342	47529916
Guca1a	ENSMUSG00000023982	17	47531509	47537533
1700001C19Rik	ENSMUSG00000047150	17	47549683	47574325
AI661453	ENSMUSG00000034382	17	47573564	47607587
Taf8	ENSMUSG00000023980	17	47624999	47639241
Ccnd3	ENSMUSG00000034165	17	47642000	47736632
Bysl	ENSMUSG00000023988	17	47736280	47748441
Med20	ENSMUSG00000092558	17	47748531	47787238
Gm20517	ENSMUSG00000023984	17	47748538	47820810
Usp49	ENSMUSG00000090115	17	47767639	47823687
Tomm6	ENSMUSG00000033475	17	47823595	47825335
Prickle4	ENSMUSG00000079444	17	47823688	47831685
AI314976	ENSMUSG00000040771	17	48549339	48556591
B430306N03Rik	ENSMUSG00000043740	17	48455466	48466349
Mdfi	ENSMUSG00000032717	17	47952277	47971640
Nfya	ENSMUSG00000023994	17	48526210	48549231
Foxp4	ENSMUSG00000023991	17	48004082	48061594
Trem2	ENSMUSG00000023992	17	48485726	48493472
Treml1	ENSMUSG00000023993	17	48499241	48506499
Treml2	ENSMUSG00000071068	17	48438864	48451859
Trem3	ENSMUSG00000041754	17	48386944	48398207
Treml4	ENSMUSG00000051682	17	48403659	48414726
A530064D06Rik	ENSMUSG00000043939	17	48288846	48304220
Gm16736	ENSMUSG00000086673	17	46608450	46962170
1700067P10Rik	ENSMUSG00000021545	17	48226582	48227870
9830107B12Rik	ENSMUSG00000073386	17	48262555	48283228
Frs3	ENSMUSG00000023266	17	47825979	47841235
Pgc	ENSMUSG00000023987	17	47863791	47871432
Tfeb	ENSMUSG00000023990	17	47873979	47929368
Trem1	ENSMUSG00000042265	17	48371903	48386091
Gm9183	ENSMUSG00000083672	17	47757720	47759288
Gm14872	ENSMUSG00000084880	17	47824559	47828032
Gm14873	ENSMUSG00000086930	17	47836920	47838945
Gm15556	ENSMUSG00000085932	17	48059327	48060378
Gm5228	ENSMUSG00000084288	17	48073039	48073395
Gm14871	ENSMUSG00000082492	17	48140328	48140521
Apobec2	ENSMUSG00000040694	17	48558556	48572053
Tspo2	ENSMUSG00000023995	17	48587281	48590847
Unc5cl	ENSMUSG00000043592	17	48594226	48679039
Ptcra	ENSMUSG00000036858	17	46893176	46900542
AC165289.1	ENSMUSG00000093309	17	47030464	47030714
7SK	ENSMUSG00000084572	17	47129572	47129865
n-R5s28	ENSMUSG00000064748	17	47985783	47985901
5S_rRNA	ENSMUSG00000089208	17	47427905	47427977
U1	ENSMUSG00000065027	17	47977765	47977934
Daam2	ENSMUSG00000040260	17	49595347	49703662
Lrfn2	ENSMUSG00000040490	17	49071704	49236913
Mocs1	ENSMUSG00000064120	17	49567687	49594760
Gm20540	ENSMUSG00000092268	17	49567263	49568565
AC154247.1	ENSMUSG00000077868	17	49325603	49325684
7SK	ENSMUSG00000088483	17	48831775	48832032
SNORA17	ENSMUSG00000077708	17	48757148	48757279
U1	ENSMUSG00000064541	17	49432067	49432226
Kif6	ENSMUSG00000023999	17	49754461	50049172
Rftn1	ENSMUSG00000039316	17	50131582	50329999
Gm16555	ENSMUSG00000090012	17	49956951	49961150
Gm16554	ENSMUSG00000090227	17	50034067	50035292
AY702103	ENSMUSG00000067103	17	50378729	50380849
Dazl	ENSMUSG00000010592	17	50418719	50432924
Plcl2	ENSMUSG00000038910	17	50648872	50827818
Gm7334	ENSMUSG00000044645	17	50837852	50839205
Tbc1d5	ENSMUSG00000023923	17	50872452	51318674
Satb1	ENSMUSG00000023927	17	51875512	51972615
U4	ENSMUSG00000084583	17	51056250	51056366
Srbd1	ENSMUSG00000024135	17	86384005	86544515
Prkce	ENSMUSG00000045038	17	86567125	87057259
Gm10309	ENSMUSG00000071036	17	86897072	86904572
Epas1	ENSMUSG00000024140	17	87153247	87232750
1700090G07Rik	ENSMUSG00000037689	17	87316688	87321706
Atp6v1e2	ENSMUSG00000053375	17	87343449	87347227
Rhoq	ENSMUSG00000024143	17	87362422	87399409
Pigf	ENSMUSG00000024145	17	87396596	87424746
Cript	ENSMUSG00000024146	17	87424890	87435150
Socs5	ENSMUSG00000037104	17	87507019	87536923
Mcfd2	ENSMUSG00000024150	17	87653998	87665275
Ttc7	ENSMUSG00000036918	17	87682226	87781110
1700011E24Rik	ENSMUSG00000036557	17	87788911	87827081
Calm2	ENSMUSG00000036438	17	87832752	87846275
Epcam	ENSMUSG00000045394	17	88035319	88050446
Msh2	ENSMUSG00000024151	17	88071670	88123053
Kcnk12	ENSMUSG00000050138	17	88145177	88197334
Gm5499	ENSMUSG00000071035	17	87477611	87478498
4833418N02Rik	ENSMUSG00000085287	17	87674226	87682154
Gm15978	ENSMUSG00000089701	17	87729104	87731392
0610012D04Rik	ENSMUSG00000089755	17	87761579	87763802
SNORA17	ENSMUSG00000089427	17	87852563	87852696
U6	ENSMUSG00000087710	17	87102638	87102747
SNORA40	ENSMUSG00000087736	17	87453034	87453165
AC129309.1	ENSMUSG00000080546	17	87583445	87583565
Napg	ENSMUSG00000024581	18	63137490	63159104
Fam38b	ENSMUSG00000041482	18	63169867	63546837
Txnl1	ENSMUSG00000024583	18	63822455	63852013
Wdr7	ENSMUSG00000040560	18	63868349	64149414
1700091E21Rik	ENSMUSG00000086128	18	64317375	64436834
St8sia3	ENSMUSG00000056812	18	64414013	64435800
Onecut2	ENSMUSG00000045991	18	64500018	64558140
Amd-ps3	ENSMUSG00000060096	18	64608334	64609669
Fech	ENSMUSG00000024588	18	64616204	64648720
Nars	ENSMUSG00000024587	18	64659319	64676211
Atp8b1	ENSMUSG00000039529	18	64688633	64820654
Nedd4l	ENSMUSG00000024589	18	65047410	65377480
5S_rRNA	ENSMUSG00000087957	18	63669549	63669668
U6	ENSMUSG00000088304	18	64945983	64946082
U6	ENSMUSG00000088656	18	63744390	63744496
U7	ENSMUSG00000089156	18	63667823	63667885
U6	ENSMUSG00000084642	18	64068736	64068810
U7	ENSMUSG00000088665	18	63668010	63668070
U7	ENSMUSG00000088613	18	64887720	64887781
SNORA48	ENSMUSG00000088726	18	63692722	63692865
Alpk2	ENSMUSG00000032845	18	65425183	65553542
F730048M01Rik	ENSMUSG00000073546	18	65466084	65469530
Malt1	ENSMUSG00000032688	18	65590617	65638477
Zfp532	ENSMUSG00000042439	18	65739884	65849088
AC132307.1	ENSMUSG00000093783	18	65671647	65671717
AC102240.1	ENSMUSG00000093283	18	65587123	65587464
AC102240.2	ENSMUSG00000093347	18	65643292	65643362
Mir122a	ENSMUSG00000065402	18	65408515	65408580

## Sheet: Venn
										157 common elements in "DT", "PT" and "FHA":				102 common elements in "DT", "PT" and "Prn":				95 common elements in "DT" and "Prn":			454 common elements in "DT" and "FHA":					389 common elements in "PT" and "Prn":					644 common elements in "DT" and "PT":					135 common elements in "PT" and "FHA":					40 common elements in "FHA" and "Prn":
										ENSMUSG00000000305	Cdh4			ENSMUSG00000066767	Gm3867			ENSMUSG00000028793	Rnf19b		ENSMUSG00000056536					ENSMUSG00000082000					ENSMUSG00000026134					ENSMUSG00000027525					ENSMUSG00000019820
										ENSMUSG00000074518	Gm10711			ENSMUSG00000059252	Tpt1-ps5			ENSMUSG00000028786	Tmem54		ENSMUSG00000026319					ENSMUSG00000082415					ENSMUSG00000044744					ENSMUSG00000060445					ENSMUSG00000039232
										ENSMUSG00000039117	Taf4a			ENSMUSG00000058521	Olfr892-ps1			ENSMUSG00000028785	Hpca		ENSMUSG00000026321					ENSMUSG00000083546					ENSMUSG00000004768					ENSMUSG00000049999					ENSMUSG00000078348
										ENSMUSG00000039108	Lsm14b			ENSMUSG00000063732	Olfr908			ENSMUSG00000001334	Fndc5		ENSMUSG00000038866					ENSMUSG00000033222					ENSMUSG00000042215					ENSMUSG00000070476					ENSMUSG00000019817
										ENSMUSG00000027566	Psma7			ENSMUSG00000042138	BC024479			ENSMUSG00000040928	S100pbp		ENSMUSG00000044340					ENSMUSG00000086564					ENSMUSG00000042197					ENSMUSG00000039155					ENSMUSG00000019815
										ENSMUSG00000039086	Ss18l1			ENSMUSG00000001946	Esam			ENSMUSG00000028811	Yars		ENSMUSG00000057329					ENSMUSG00000027864					ENSMUSG00000042182					ENSMUSG00000082215					ENSMUSG00000019814
										ENSMUSG00000039069	Gtpbp5			ENSMUSG00000001943	Vsig2			ENSMUSG00000050390	C77080		ENSMUSG00000009905					ENSMUSG00000051076					ENSMUSG00000079617					ENSMUSG00000039138					ENSMUSG00000062866
										ENSMUSG00000039059	Hrh3			ENSMUSG00000053310	Nrgn			ENSMUSG00000001333	Sync		ENSMUSG00000009907					ENSMUSG00000033233					ENSMUSG00000042111					ENSMUSG00000061897					ENSMUSG00000019810
										ENSMUSG00000083410	Gm14300			ENSMUSG00000001948	Spa17			ENSMUSG00000057236	Rbbp4		ENSMUSG00000067006					ENSMUSG00000073686					ENSMUSG00000026127					ENSMUSG00000081481					ENSMUSG00000019809
										ENSMUSG00000085704	4921531C22Rik			ENSMUSG00000001942	Siae			ENSMUSG00000057572	Zbtb8os		ENSMUSG00000059956					ENSMUSG00000029047					ENSMUSG00000026126					ENSMUSG00000081882					ENSMUSG00000019808
										ENSMUSG00000082850	Gm14299			ENSMUSG00000011114	Tbrg1			ENSMUSG00000028807	Zbtb8a		ENSMUSG00000048775					ENSMUSG00000029048					ENSMUSG00000026125					ENSMUSG00000039717					ENSMUSG00000019806
										ENSMUSG00000090589	Gm17180			ENSMUSG00000011118	Panx3			ENSMUSG00000085085	1700086P04Rik		ENSMUSG00000044594					ENSMUSG00000029049					ENSMUSG00000026124					ENSMUSG00000088546					ENSMUSG00000015501
										ENSMUSG00000080507	AL663067.1			ENSMUSG00000061165	Olfr151			ENSMUSG00000087416	Gm15906		ENSMUSG00000058017					ENSMUSG00000029050					ENSMUSG00000037529					ENSMUSG00000084684					ENSMUSG00000091527
										ENSMUSG00000045699	Gm8935			ENSMUSG00000063350	Olfr874			ENSMUSG00000087575	Gm12976		ENSMUSG00000073602					ENSMUSG00000073684					ENSMUSG00000045815					ENSMUSG00000089231					ENSMUSG00000085233
										ENSMUSG00000078587	Gm2464			ENSMUSG00000058628	Olfr875			ENSMUSG00000082468	Gm12980		ENSMUSG00000073601					ENSMUSG00000029053					ENSMUSG00000045174					ENSMUSG00000088540					ENSMUSG00000064531
										ENSMUSG00000015202	Cnksr3			ENSMUSG00000066750	Olfr876			ENSMUSG00000091673	Gm17525		ENSMUSG00000026327					ENSMUSG00000029054					ENSMUSG00000037509					ENSMUSG00000029673					ENSMUSG00000024135
										ENSMUSG00000064065	Ipcef1			ENSMUSG00000066749	Olfr877			ENSMUSG00000088921	snoU13		ENSMUSG00000067001					ENSMUSG00000047613					ENSMUSG00000037503					ENSMUSG00000079173					ENSMUSG00000045038
										ENSMUSG00000000766	Oprm1			ENSMUSG00000066748	Olfr145			ENSMUSG00000093163	AL607123.1		ENSMUSG00000067017					ENSMUSG00000029027					ENSMUSG00000026123					ENSMUSG00000029711					ENSMUSG00000071036
										ENSMUSG00000078488	Gm10945			ENSMUSG00000066747	Olfr878			ENSMUSG00000048485	Zbtb8b		ENSMUSG00000067015					ENSMUSG00000039523					ENSMUSG00000081402					ENSMUSG00000029715					ENSMUSG00000024140
										ENSMUSG00000081926	Gm15536			ENSMUSG00000060583	Olfr881			ENSMUSG00000040859	Bsdc1		ENSMUSG00000054006					ENSMUSG00000029028					ENSMUSG00000089955					ENSMUSG00000029714					ENSMUSG00000037689
										ENSMUSG00000019775	Rgs17			ENSMUSG00000062841	Olfr883			ENSMUSG00000064613	U1		ENSMUSG00000083613					ENSMUSG00000039492					ENSMUSG00000046858					ENSMUSG00000029713					ENSMUSG00000053375
										ENSMUSG00000019774	Mtrf1l			ENSMUSG00000058130	Olfr884			ENSMUSG00000000411	Tssk3		ENSMUSG00000084228					ENSMUSG00000029026					ENSMUSG00000077231					ENSMUSG00000029712					ENSMUSG00000024143
										ENSMUSG00000019773	Fbxo5			ENSMUSG00000057029	Olfr885			ENSMUSG00000078554	1700125D06Rik		ENSMUSG00000083884					ENSMUSG00000029029					ENSMUSG00000092852					ENSMUSG00000029716					ENSMUSG00000024145
										ENSMUSG00000019772	Vip			ENSMUSG00000059942	Olfr887			ENSMUSG00000086336	Gm12979		ENSMUSG00000080729					ENSMUSG00000029030					ENSMUSG00000045216					ENSMUSG00000037221					ENSMUSG00000024146
										ENSMUSG00000046916	Myct1			ENSMUSG00000059275	Olfr888			ENSMUSG00000047945	Marcksl1		ENSMUSG00000081114					ENSMUSG00000057751					ENSMUSG00000037470					ENSMUSG00000029718					ENSMUSG00000037104
										ENSMUSG00000019769	Syne1			ENSMUSG00000062211	Olfr889			ENSMUSG00000028800	Hdac1		ENSMUSG00000084189					ENSMUSG00000029032					ENSMUSG00000047180					ENSMUSG00000089984					ENSMUSG00000024150
										ENSMUSG00000061261	Gm10097			ENSMUSG00000061096	Olfr890			ENSMUSG00000000409	Lck		ENSMUSG00000087210					ENSMUSG00000039410					ENSMUSG00000037447					ENSMUSG00000093445					ENSMUSG00000036918
										ENSMUSG00000019768	Esr1			ENSMUSG00000045528	Olfr891			ENSMUSG00000050493	Fam167b		ENSMUSG00000076999					ENSMUSG00000051276					ENSMUSG00000010453					ENSMUSG00000029720					ENSMUSG00000036557
										ENSMUSG00000093189	AC161829.1			ENSMUSG00000070312	Olfr893			ENSMUSG00000028798	Eif3i		ENSMUSG00000089206					ENSMUSG00000046637					ENSMUSG00000001143					ENSMUSG00000079165					ENSMUSG00000036438
										ENSMUSG00000077596	U6			ENSMUSG00000070311	Olfr894			ENSMUSG00000028797	2510006D16Rik		ENSMUSG00000089278					ENSMUSG00000058183					ENSMUSG00000037408					ENSMUSG00000047182					ENSMUSG00000045394
										ENSMUSG00000092769	AC162387.1			ENSMUSG00000070310	Olfr143			ENSMUSG00000078552	Dcdc2b		ENSMUSG00000039050					ENSMUSG00000029059					ENSMUSG00000001138					ENSMUSG00000029722					ENSMUSG00000024151
										ENSMUSG00000087350	Gm16254			ENSMUSG00000070309	Olfr895			ENSMUSG00000040795	Iqcc		ENSMUSG00000039041					ENSMUSG00000042333					ENSMUSG00000067653					ENSMUSG00000045348					ENSMUSG00000050138
										ENSMUSG00000019762	Iyd			ENSMUSG00000058270	Olfr25			ENSMUSG00000028795	Ccdc28b		ENSMUSG00000015647					ENSMUSG00000048001					ENSMUSG00000079610					ENSMUSG00000029723					ENSMUSG00000071035
										ENSMUSG00000040653	Ppp1r14c			ENSMUSG00000060101	Olfr898			ENSMUSG00000053841	Txlna		ENSMUSG00000039001					ENSMUSG00000029056					ENSMUSG00000026121					ENSMUSG00000029725					ENSMUSG00000085287
										ENSMUSG00000091618	H60c			ENSMUSG00000049864	Olfr250			ENSMUSG00000003731	Kpna6		ENSMUSG00000038990					ENSMUSG00000029055					ENSMUSG00000046337					ENSMUSG00000029726					ENSMUSG00000089701
										ENSMUSG00000071434	9230019H11Rik			ENSMUSG00000062388	Olfr251			ENSMUSG00000053730	Tmem39b		ENSMUSG00000038980					ENSMUSG00000085390					ENSMUSG00000037432					ENSMUSG00000037108					ENSMUSG00000089755
										ENSMUSG00000019796	Lrp11			ENSMUSG00000049098	Olfr147			ENSMUSG00000028790	Khdrbs1		ENSMUSG00000015627					ENSMUSG00000086272					ENSMUSG00000087589					ENSMUSG00000046245					ENSMUSG00000089427
										ENSMUSG00000019795	Pcmt1			ENSMUSG00000052058	Olfr901			ENSMUSG00000028788	Ptp4a2		ENSMUSG00000056061					ENSMUSG00000078350					ENSMUSG00000089906					ENSMUSG00000066684					ENSMUSG00000087710
										ENSMUSG00000040034	Nup43			ENSMUSG00000049334	Olfr902			ENSMUSG00000086797	Gm12965		ENSMUSG00000038963					ENSMUSG00000080807					ENSMUSG00000064601					ENSMUSG00000066682					ENSMUSG00000087736
										ENSMUSG00000040021	Lats1			ENSMUSG00000051620	Olfr904			ENSMUSG00000080944	Gm12967		ENSMUSG00000027568					ENSMUSG00000082073					ENSMUSG00000061518					ENSMUSG00000029727					ENSMUSG00000080546
										ENSMUSG00000019794	Katna1			ENSMUSG00000046455	Olfr905			ENSMUSG00000073753	Gm10571		ENSMUSG00000027569					ENSMUSG00000087071					ENSMUSG00000037351					ENSMUSG00000056966
										ENSMUSG00000086086	Gm16760			ENSMUSG00000039962	Olfr906			ENSMUSG00000070729	Gm12966		ENSMUSG00000049401					ENSMUSG00000081276					ENSMUSG00000026117					ENSMUSG00000037053
										ENSMUSG00000080655	AC155833.1			ENSMUSG00000045066	Olfr907			ENSMUSG00000086369	E330017L17Rik		ENSMUSG00000027570					ENSMUSG00000086565					ENSMUSG00000026116					ENSMUSG00000063739
										ENSMUSG00000092190	Gm20470			ENSMUSG00000062621	Olfr911-ps1			ENSMUSG00000065768	U1		ENSMUSG00000038932					ENSMUSG00000084987					ENSMUSG00000077939					ENSMUSG00000090873
										ENSMUSG00000021294	Kif26a			ENSMUSG00000057444	Olfr910			ENSMUSG00000028784	Spocd1		ENSMUSG00000038914					ENSMUSG00000085069					ENSMUSG00000080054					ENSMUSG00000081228
										ENSMUSG00000047828	A730018C14Rik			ENSMUSG00000060114	Olfr912			ENSMUSG00000028782	Bai2		ENSMUSG00000027573					ENSMUSG00000086810					ENSMUSG00000050122					ENSMUSG00000079163
										ENSMUSG00000043122	A530016L24Rik			ENSMUSG00000059189	Olfr913			ENSMUSG00000085389	1700003M07Rik		ENSMUSG00000084843					ENSMUSG00000087012					ENSMUSG00000070201					ENSMUSG00000082088
										ENSMUSG00000054013	Tmem179			ENSMUSG00000047050	Olfr914			ENSMUSG00000085517	Gm12963		ENSMUSG00000092827					ENSMUSG00000087437					ENSMUSG00000026235					ENSMUSG00000083813
										ENSMUSG00000037679	Inf2			ENSMUSG00000064113	Olfr916			ENSMUSG00000040690	Col16a1		ENSMUSG00000064422					ENSMUSG00000092483					ENSMUSG00000065215					ENSMUSG00000075599
										ENSMUSG00000011148	Adssl1			ENSMUSG00000063225	Olfr917			ENSMUSG00000028779	Pef1		ENSMUSG00000065460					ENSMUSG00000077519					ENSMUSG00000004872					ENSMUSG00000075598
										ENSMUSG00000064326	Siva1			ENSMUSG00000046150	Olfr918			ENSMUSG00000028778	Hcrtr1		ENSMUSG00000070144					ENSMUSG00000088774					ENSMUSG00000032908					ENSMUSG00000029729
										ENSMUSG00000001729	Akt1			ENSMUSG00000056961	Olfr919			ENSMUSG00000028776	Tinagl1		ENSMUSG00000073871					ENSMUSG00000084803					ENSMUSG00000026245					ENSMUSG00000079156
										ENSMUSG00000037638	Zbtb42			ENSMUSG00000023186	Vwa5a			ENSMUSG00000023120	Gm853		ENSMUSG00000078725					ENSMUSG00000042233					ENSMUSG00000090486					ENSMUSG00000037017
										ENSMUSG00000072825	AW555464			ENSMUSG00000061039	Olfr920			ENSMUSG00000023232	Serinc2		ENSMUSG00000073869					ENSMUSG00000078490					ENSMUSG00000012187					ENSMUSG00000085211
										ENSMUSG00000052160	Pld4			ENSMUSG00000049926	Olfr921			ENSMUSG00000073752	Gm10570		ENSMUSG00000066202					ENSMUSG00000065940					ENSMUSG00000032883					ENSMUSG00000081497
										ENSMUSG00000072812	Ahnak2			ENSMUSG00000043911	Olfr922			ENSMUSG00000028773	Fabp3		ENSMUSG00000066201					ENSMUSG00000093721					ENSMUSG00000079470					ENSMUSG00000040006
										ENSMUSG00000037594	BC022687			ENSMUSG00000044798	Olfr923			ENSMUSG00000028772	Zcchc17		ENSMUSG00000055406					ENSMUSG00000090136					ENSMUSG00000047330					ENSMUSG00000052979
										ENSMUSG00000047832	Cdca4			ENSMUSG00000062103	Olfr924			ENSMUSG00000074088	Snrnp40		ENSMUSG00000073868					ENSMUSG00000023093					ENSMUSG00000072978					ENSMUSG00000015757
										ENSMUSG00000021298	Gpr132			ENSMUSG00000047667	Olfr26			ENSMUSG00000078532	Nkain1		ENSMUSG00000054885					ENSMUSG00000090710					ENSMUSG00000026361					ENSMUSG00000039981
										ENSMUSG00000091222	Gm17723			ENSMUSG00000064333	Olfr926			ENSMUSG00000079884	Gm10698		ENSMUSG00000071005					ENSMUSG00000074448					ENSMUSG00000078284					ENSMUSG00000015755
										ENSMUSG00000002799	Jag2			ENSMUSG00000063221	Olfr930			ENSMUSG00000053889	A130066N16Rik		ENSMUSG00000071003					ENSMUSG00000091248					ENSMUSG00000033849					ENSMUSG00000047712
										ENSMUSG00000002804	Nudt14			ENSMUSG00000058515	Olfr933			ENSMUSG00000070315	4930581F22Rik		ENSMUSG00000078722					ENSMUSG00000070313					ENSMUSG00000018196					ENSMUSG00000015305
										ENSMUSG00000011158	Brf1			ENSMUSG00000057424	Olfr934			ENSMUSG00000086984	Gm6762		ENSMUSG00000078721					ENSMUSG00000032110					ENSMUSG00000018199					ENSMUSG00000091633
										ENSMUSG00000002803	Btbd6			ENSMUSG00000059595	Olfr935			ENSMUSG00000061932	Gm10105		ENSMUSG00000050141					ENSMUSG00000032113					ENSMUSG00000018189					ENSMUSG00000077582
										ENSMUSG00000021143	Pacs2			ENSMUSG00000058820	Olfr146			ENSMUSG00000032036	Kirrel3		ENSMUSG00000036062					ENSMUSG00000032116					ENSMUSG00000026360					ENSMUSG00000093060
										ENSMUSG00000012211	Tex22			ENSMUSG00000047724	Olfr937			ENSMUSG00000032038	St3gal4		ENSMUSG00000036052					ENSMUSG00000062762					ENSMUSG00000051079					ENSMUSG00000065692
										ENSMUSG00000021144	Mta1			ENSMUSG00000048501	Olfr938			ENSMUSG00000032040	Dcps		ENSMUSG00000028451					ENSMUSG00000032118					ENSMUSG00000026358					ENSMUSG00000093360
										ENSMUSG00000006356	Crip2			ENSMUSG00000049708	Olfr27			ENSMUSG00000032041	Tirap		ENSMUSG00000028452					ENSMUSG00000035934					ENSMUSG00000091758					ENSMUSG00000088857
										ENSMUSG00000006360	Crip1			ENSMUSG00000062149	Olfr943			ENSMUSG00000032042	Srpr		ENSMUSG00000028453					ENSMUSG00000032121					ENSMUSG00000089640					ENSMUSG00000061533
										ENSMUSG00000037466	4930427A07Rik			ENSMUSG00000060905	Olfr944			ENSMUSG00000039048	Foxred1		ENSMUSG00000028454					ENSMUSG00000032122					ENSMUSG00000088323					ENSMUSG00000020963
										ENSMUSG00000049036	Tmem121			ENSMUSG00000063670	Olfr1537-ps1			ENSMUSG00000050471	Fam118b		ENSMUSG00000028455					ENSMUSG00000034303					ENSMUSG00000033488					ENSMUSG00000020962
										ENSMUSG00000087642	Ighe			ENSMUSG00000063380	Olfr945			ENSMUSG00000032044	Rpusd4		ENSMUSG00000036002					ENSMUSG00000046240					ENSMUSG00000087093					ENSMUSG00000020961
										ENSMUSG00000076612	Ighg2c			ENSMUSG00000057349	Olfr948			ENSMUSG00000066771	Gm5614		ENSMUSG00000028456					ENSMUSG00000032125					ENSMUSG00000026589					ENSMUSG00000020964
										ENSMUSG00000090726	Gm17421			ENSMUSG00000060129	Olfr951			ENSMUSG00000038119	Cdon		ENSMUSG00000028457					ENSMUSG00000032128					ENSMUSG00000004031					ENSMUSG00000085004
										ENSMUSG00000078993	Gm11029			ENSMUSG00000058856	Olfr952			ENSMUSG00000032101	Ddx25		ENSMUSG00000035969					ENSMUSG00000085904					ENSMUSG00000026587					ENSMUSG00000090722
										ENSMUSG00000051804	Adam6b			ENSMUSG00000064173	Olfr954			ENSMUSG00000032103	Pus3		ENSMUSG00000042788					ENSMUSG00000077401					ENSMUSG00000070103					ENSMUSG00000086689
										ENSMUSG00000043945	Adam6a			ENSMUSG00000063176	Olfr955			ENSMUSG00000050555	Hyls1		ENSMUSG00000028458					ENSMUSG00000077483					ENSMUSG00000073530					ENSMUSG00000066389
										ENSMUSG00000090980	Gm17274			ENSMUSG00000062649	Olfr44			ENSMUSG00000074452	Pate2		ENSMUSG00000028459					ENSMUSG00000044107					ENSMUSG00000026726					ENSMUSG00000060323
										ENSMUSG00000076611	Ighe			ENSMUSG00000077240	SNORA17			ENSMUSG00000032099	Pate4		ENSMUSG00000028460					ENSMUSG00000038112					ENSMUSG00000027536					ENSMUSG00000092100
										ENSMUSG00000076613	Ighg2b			ENSMUSG00000065620	U2			ENSMUSG00000090858	Gm17365		ENSMUSG00000028461					ENSMUSG00000048299					ENSMUSG00000027534					ENSMUSG00000084566
										ENSMUSG00000076614	Ighg1			ENSMUSG00000078003	CT025680.1			ENSMUSG00000091215	Gm17252		ENSMUSG00000051517					ENSMUSG00000059867					ENSMUSG00000052468					ENSMUSG00000089439
										ENSMUSG00000076615	Ighg3			ENSMUSG00000093152	AC073947.1			ENSMUSG00000091603	Gm17346		ENSMUSG00000028463					ENSMUSG00000059106					ENSMUSG00000027528					ENSMUSG00000077096
										ENSMUSG00000076617	Ighm			ENSMUSG00000042949	Olfr957			ENSMUSG00000065934	U1		ENSMUSG00000028464					ENSMUSG00000064110					ENSMUSG00000062515					ENSMUSG00000080365
										ENSMUSG00000076618	Ighj4			ENSMUSG00000077427	SNORA17			ENSMUSG00000088605	5S_rRNA		ENSMUSG00000028465					ENSMUSG00000062121					ENSMUSG00000027530					ENSMUSG00000059877
										ENSMUSG00000076619	Ighj3			ENSMUSG00000050853	Olfr958			ENSMUSG00000089465	5S_rRNA		ENSMUSG00000028466					ENSMUSG00000055636					ENSMUSG00000027531					ENSMUSG00000042590
										ENSMUSG00000076620	Ighj2			ENSMUSG00000059366	Olfr959			ENSMUSG00000088056	SNORA48		ENSMUSG00000028467					ENSMUSG00000088866					ENSMUSG00000058921					ENSMUSG00000078933
										ENSMUSG00000076621	Ighj1			ENSMUSG00000039316	Rftn1			ENSMUSG00000088905	SNORA17		ENSMUSG00000028468					ENSMUSG00000058652					ENSMUSG00000039795					ENSMUSG00000021692
										ENSMUSG00000076622	Ighd4-1			ENSMUSG00000067103	AY702103			ENSMUSG00000091174	Gm17677		ENSMUSG00000078719					ENSMUSG00000055820					ENSMUSG00000087858					ENSMUSG00000021693
										ENSMUSG00000076623	Ighd3-2			ENSMUSG00000010592	Dazl			ENSMUSG00000090738	Gm17727		ENSMUSG00000028469					ENSMUSG00000058532					ENSMUSG00000069106					ENSMUSG00000071181
										ENSMUSG00000091062	Ighd5-6			ENSMUSG00000038910	Plcl2			ENSMUSG00000032108	D730048I06Rik		ENSMUSG00000066196					ENSMUSG00000063359					ENSMUSG00000093022					ENSMUSG00000049233
										ENSMUSG00000076624	Ighd2-8			ENSMUSG00000044645	Gm7334			ENSMUSG00000047980	9230110F15Rik		ENSMUSG00000028470					ENSMUSG00000063657					ENSMUSG00000034544					ENSMUSG00000032846
										ENSMUSG00000091857	Ighd5-5			ENSMUSG00000023923	Tbc1d5			ENSMUSG00000078934	9230113P08Rik		ENSMUSG00000043633					ENSMUSG00000061686					ENSMUSG00000090408					ENSMUSG00000093334
										ENSMUSG00000076625	Ighd2-7			ENSMUSG00000040260	Daam2			ENSMUSG00000020644	Id2		ENSMUSG00000078716					ENSMUSG00000058827					ENSMUSG00000048416					ENSMUSG00000077261
										ENSMUSG00000091051	Ighd5-8			ENSMUSG00000023999	Kif6			ENSMUSG00000020642	Rnf144a		ENSMUSG00000050215					ENSMUSG00000060107					ENSMUSG00000027774					ENSMUSG00000064854
										ENSMUSG00000091630	Ighd5-4			ENSMUSG00000040490	Lrfn2			ENSMUSG00000089441	5S_rRNA		ENSMUSG00000046450					ENSMUSG00000051493					ENSMUSG00000047557					ENSMUSG00000010376
										ENSMUSG00000076626	Ighd2-6			ENSMUSG00000064120	Mocs1						ENSMUSG00000071001					ENSMUSG00000043331					ENSMUSG00000049404					ENSMUSG00000022212
										ENSMUSG00000092160	Ighd5-7			ENSMUSG00000092268	Gm20540						ENSMUSG00000044801					ENSMUSG00000047352					ENSMUSG00000027775					ENSMUSG00000002325
										ENSMUSG00000091334	Ighd5-3			ENSMUSG00000090012	Gm16555						ENSMUSG00000059448					ENSMUSG00000044292					ENSMUSG00000051777					ENSMUSG00000002324
										ENSMUSG00000076627	Ighd2-5			ENSMUSG00000090227	Gm16554						ENSMUSG00000059101					ENSMUSG00000059473					ENSMUSG00000027777					ENSMUSG00000002319
										ENSMUSG00000091394	Ighd5-2			ENSMUSG00000077868	AC154247.1						ENSMUSG00000071000					ENSMUSG00000060254					ENSMUSG00000068979					ENSMUSG00000002320
										ENSMUSG00000076628	Ighd2-4			ENSMUSG00000064541	U1						ENSMUSG00000028476					ENSMUSG00000046678					ENSMUSG00000027776					ENSMUSG00000007591
										ENSMUSG00000091704	Ighd6-2			ENSMUSG00000084583	U4						ENSMUSG00000028480					ENSMUSG00000066639					ENSMUSG00000091272					ENSMUSG00000002329
										ENSMUSG00000076629	Ighd2-3										ENSMUSG00000070999					ENSMUSG00000049010					ENSMUSG00000046999					ENSMUSG00000022209
										ENSMUSG00000090563	Ighd6-1										ENSMUSG00000028478					ENSMUSG00000044205					ENSMUSG00000027778					ENSMUSG00000060680
										ENSMUSG00000076630	Ighd1-1										ENSMUSG00000091065					ENSMUSG00000045812					ENSMUSG00000034349					ENSMUSG00000022210
										ENSMUSG00000076631	Ighd3-1										ENSMUSG00000083417					ENSMUSG00000049073					ENSMUSG00000034317					ENSMUSG00000022211
										ENSMUSG00000091517	Ighd5-1										ENSMUSG00000081420					ENSMUSG00000087047					ENSMUSG00000027782					ENSMUSG00000002326
										ENSMUSG00000076632	Gm16968										ENSMUSG00000081329					ENSMUSG00000040541					ENSMUSG00000027784					ENSMUSG00000007589
										ENSMUSG00000091606	Ighv2-1										ENSMUSG00000086983					ENSMUSG00000070308					ENSMUSG00000058360					ENSMUSG00000022218
										ENSMUSG00000076633	Ighv5-2										ENSMUSG00000073872					ENSMUSG00000051095					ENSMUSG00000093384					ENSMUSG00000086341
										ENSMUSG00000076634	Ighv2-2										ENSMUSG00000085910					ENSMUSG00000025602					ENSMUSG00000093730					ENSMUSG00000040632
										ENSMUSG00000076635	Ighv5-4										ENSMUSG00000087142					ENSMUSG00000049281					ENSMUSG00000093402					ENSMUSG00000040618
										ENSMUSG00000076636	Ighv2-3										ENSMUSG00000085351					ENSMUSG00000040111					ENSMUSG00000093505					ENSMUSG00000053588
										ENSMUSG00000076637	Ighv5-6										ENSMUSG00000086043					ENSMUSG00000093182					ENSMUSG00000027783					ENSMUSG00000022214
										ENSMUSG00000076638	Ighv2-4										ENSMUSG00000043770					ENSMUSG00000090869					ENSMUSG00000091315					ENSMUSG00000022215
										ENSMUSG00000090395	Gm17309										ENSMUSG00000028475					ENSMUSG00000086014					ENSMUSG00000065606					ENSMUSG00000022216
										ENSMUSG00000076639	Ighv5-9										ENSMUSG00000086864					ENSMUSG00000032024					ENSMUSG00000084617					ENSMUSG00000022217
										ENSMUSG00000076640	Ighv2-5										ENSMUSG00000088947					ENSMUSG00000087135					ENSMUSG00000077459					ENSMUSG00000079197
										ENSMUSG00000076641	Ighv5-12										ENSMUSG00000092675					ENSMUSG00000015656					ENSMUSG00000089417					ENSMUSG00000047098
										ENSMUSG00000076642	Ighv2-6										ENSMUSG00000089028					ENSMUSG00000054360					ENSMUSG00000065580					ENSMUSG00000088402
										ENSMUSG00000076643	Ighv5-9-1										ENSMUSG00000088088					ENSMUSG00000032023					ENSMUSG00000090941					ENSMUSG00000040452
										ENSMUSG00000076645	Ighv2-9-1										ENSMUSG00000077552					ENSMUSG00000064791					ENSMUSG00000043300					ENSMUSG00000064812
										ENSMUSG00000076646	Ighv2-6-8										ENSMUSG00000004530					ENSMUSG00000075876					ENSMUSG00000068969					ENSMUSG00000040420
										ENSMUSG00000076647	Ighv2-7										ENSMUSG00000042121					ENSMUSG00000075924					ENSMUSG00000027787					ENSMUSG00000021927
										ENSMUSG00000076648	Ighv5-15										ENSMUSG00000042096					ENSMUSG00000032021					ENSMUSG00000043461					ENSMUSG00000022240
										ENSMUSG00000076649	Ighv5-16										ENSMUSG00000042078					ENSMUSG00000062202					ENSMUSG00000027788					ENSMUSG00000088364
										ENSMUSG00000076650	Ighv5-17										ENSMUSG00000029592					ENSMUSG00000024026					ENSMUSG00000090743					ENSMUSG00000087874
										ENSMUSG00000076651	Ighv2-9										ENSMUSG00000044339					ENSMUSG00000033826					ENSMUSG00000077366					ENSMUSG00000087836
										ENSMUSG00000076652	Ighv7-1										ENSMUSG00000029591					ENSMUSG00000024027					ENSMUSG00000087848					ENSMUSG00000077468
										ENSMUSG00000076653	Ighv7-2										ENSMUSG00000042010					ENSMUSG00000054134					ENSMUSG00000089507					ENSMUSG00000039168
										ENSMUSG00000076654	Ighv14-1										ENSMUSG00000042002					ENSMUSG00000024030					ENSMUSG00000074877					ENSMUSG00000055416
										ENSMUSG00000076655	Ighv4-1										ENSMUSG00000066952					ENSMUSG00000024029					ENSMUSG00000086538					ENSMUSG00000022237
										ENSMUSG00000076669	Ighv3-1										ENSMUSG00000001098					ENSMUSG00000024028					ENSMUSG00000027790					ENSMUSG00000022236
										ENSMUSG00000076657	Ighv11-1										ENSMUSG00000029577					ENSMUSG00000024032					ENSMUSG00000048304					ENSMUSG00000039100
										ENSMUSG00000076658	Ighv14-2										ENSMUSG00000029575					ENSMUSG00000024034					ENSMUSG00000027792					ENSMUSG00000068964
										ENSMUSG00000078992	Ighv3-2										ENSMUSG00000041939					ENSMUSG00000042345					ENSMUSG00000084752
										ENSMUSG00000076659	Ighv11-2										ENSMUSG00000041930					ENSMUSG00000024033					ENSMUSG00000088794
										ENSMUSG00000076660	Ighv14-3										ENSMUSG00000014158					ENSMUSG00000024036					ENSMUSG00000077050
										ENSMUSG00000076661	Ighv16-1										ENSMUSG00000011884					ENSMUSG00000041119					ENSMUSG00000033342
										ENSMUSG00000092748	AC073553.3										ENSMUSG00000002486					ENSMUSG00000024037					ENSMUSG00000028007
										ENSMUSG00000092737	AC073553.2										ENSMUSG00000041890					ENSMUSG00000024038					ENSMUSG00000033308
										ENSMUSG00000087842	U6										ENSMUSG00000041870					ENSMUSG00000006705					ENSMUSG00000093000
										ENSMUSG00000092683	AC073553.1										ENSMUSG00000072694					ENSMUSG00000024039					ENSMUSG00000093054
										ENSMUSG00000056553	Ptprn2										ENSMUSG00000092252					ENSMUSG00000061613					ENSMUSG00000065569
										ENSMUSG00000065538	Mir153										ENSMUSG00000092279					ENSMUSG00000024041					ENSMUSG00000029167
										ENSMUSG00000041992	Rapgef5										ENSMUSG00000092486					ENSMUSG00000024042					ENSMUSG00000029169
										ENSMUSG00000089482	5S_rRNA										ENSMUSG00000078186					ENSMUSG00000002076					ENSMUSG00000072941
										ENSMUSG00000047565	Acot10										ENSMUSG00000029564					ENSMUSG00000058392					ENSMUSG00000045790
										ENSMUSG00000089258	SNORA17										ENSMUSG00000054123					ENSMUSG00000038146					ENSMUSG00000039252
										ENSMUSG00000091243	Vgll3										ENSMUSG00000029561					ENSMUSG00000037577					ENSMUSG00000052295
										ENSMUSG00000088181	7SK										ENSMUSG00000041827					ENSMUSG00000024002					ENSMUSG00000029173
										ENSMUSG00000064449	U6										ENSMUSG00000029559					ENSMUSG00000024045					ENSMUSG00000029186
										ENSMUSG00000064115	Cadm2										ENSMUSG00000029556					ENSMUSG00000002625					ENSMUSG00000029179
										ENSMUSG00000092599	1700010K23Rik										ENSMUSG00000029550					ENSMUSG00000024050					ENSMUSG00000029176
										ENSMUSG00000092400	Gm20469										ENSMUSG00000072693					ENSMUSG00000052142					ENSMUSG00000029188
										ENSMUSG00000045178	4933411O13Rik										ENSMUSG00000029545					ENSMUSG00000086010					ENSMUSG00000029189
										ENSMUSG00000082823	Gm15828										ENSMUSG00000046562					ENSMUSG00000013562					ENSMUSG00000061461
																					ENSMUSG00000048578					ENSMUSG00000091548					ENSMUSG00000087676
																					ENSMUSG00000090458					ENSMUSG00000002791					ENSMUSG00000090642
																					ENSMUSG00000089734					ENSMUSG00000090984					ENSMUSG00000077696
																					ENSMUSG00000084243					ENSMUSG00000091543					ENSMUSG00000077757
																					ENSMUSG00000085590					ENSMUSG00000091872					ENSMUSG00000088981
																					ENSMUSG00000086302					ENSMUSG00000089622					ENSMUSG00000088646
																					ENSMUSG00000092183					ENSMUSG00000084600					ENSMUSG00000077316
																					ENSMUSG00000078187					ENSMUSG00000093323					ENSMUSG00000091555
																					ENSMUSG00000082052					ENSMUSG00000089559					ENSMUSG00000085412
																					ENSMUSG00000080707					ENSMUSG00000088406					ENSMUSG00000081979
																					ENSMUSG00000087477					ENSMUSG00000092731					ENSMUSG00000082781
																					ENSMUSG00000086054					ENSMUSG00000024365					ENSMUSG00000087658
																					ENSMUSG00000086140					ENSMUSG00000061207					ENSMUSG00000056445
																					ENSMUSG00000086167					ENSMUSG00000040482					ENSMUSG00000087626
																					ENSMUSG00000072692					ENSMUSG00000040356					ENSMUSG00000085696
																					ENSMUSG00000065320					ENSMUSG00000024369					ENSMUSG00000092475
																					ENSMUSG00000029544					ENSMUSG00000090231					ENSMUSG00000056583
																					ENSMUSG00000083182					ENSMUSG00000024371					ENSMUSG00000086427
																					ENSMUSG00000060152					ENSMUSG00000092511					ENSMUSG00000055408
																					ENSMUSG00000041740					ENSMUSG00000049823					ENSMUSG00000086126
																					ENSMUSG00000083875					ENSMUSG00000013787					ENSMUSG00000059159
																					ENSMUSG00000041733					ENSMUSG00000007034					ENSMUSG00000084282
																					ENSMUSG00000009013					ENSMUSG00000007038					ENSMUSG00000004980
																					ENSMUSG00000029538					ENSMUSG00000090877					ENSMUSG00000029836
																					ENSMUSG00000029536					ENSMUSG00000091971					ENSMUSG00000038301
																					ENSMUSG00000029535					ENSMUSG00000092609					ENSMUSG00000059182
																					ENSMUSG00000041697					ENSMUSG00000007033					ENSMUSG00000029844
																					ENSMUSG00000054256					ENSMUSG00000007050					ENSMUSG00000014704
																					ENSMUSG00000057354					ENSMUSG00000091747					ENSMUSG00000093412
																					ENSMUSG00000029522					ENSMUSG00000007029					ENSMUSG00000079560
																					ENSMUSG00000029524					ENSMUSG00000007030					ENSMUSG00000056468
																					ENSMUSG00000029528					ENSMUSG00000036185					ENSMUSG00000000942
																					ENSMUSG00000067274					ENSMUSG00000007035					ENSMUSG00000059723
																					ENSMUSG00000041638					ENSMUSG00000007041					ENSMUSG00000038253
																					ENSMUSG00000082610					ENSMUSG00000007039					ENSMUSG00000043219
																					ENSMUSG00000086368					ENSMUSG00000073414					ENSMUSG00000038236
																					ENSMUSG00000086352					ENSMUSG00000007044					ENSMUSG00000038227
																					ENSMUSG00000087292					ENSMUSG00000092586					ENSMUSG00000000938
																					ENSMUSG00000081282					ENSMUSG00000073413					ENSMUSG00000038210
																					ENSMUSG00000086849					ENSMUSG00000013766					ENSMUSG00000038203
																					ENSMUSG00000075998					ENSMUSG00000034923					ENSMUSG00000005503
																					ENSMUSG00000075779					ENSMUSG00000007036					ENSMUSG00000029832
																					ENSMUSG00000029518					ENSMUSG00000034482					ENSMUSG00000073072
																					ENSMUSG00000041609					ENSMUSG00000043807					ENSMUSG00000065505
																					ENSMUSG00000083833					ENSMUSG00000024387					ENSMUSG00000092936
																					ENSMUSG00000029516					ENSMUSG00000092417					ENSMUSG00000065443
																					ENSMUSG00000029513					ENSMUSG00000043311					ENSMUSG00000029776
																					ENSMUSG00000079278					ENSMUSG00000024391					ENSMUSG00000004535
																					ENSMUSG00000043913					ENSMUSG00000024392					ENSMUSG00000063568
																					ENSMUSG00000085376					ENSMUSG00000024393					ENSMUSG00000064792
																					ENSMUSG00000084992					ENSMUSG00000024397					ENSMUSG00000081872
																					ENSMUSG00000090728					ENSMUSG00000073412					ENSMUSG00000089209
																					ENSMUSG00000086655					ENSMUSG00000024399					ENSMUSG00000030359
																					ENSMUSG00000086122					ENSMUSG00000024401					ENSMUSG00000047228
																					ENSMUSG00000064293					ENSMUSG00000024402					ENSMUSG00000030361
																					ENSMUSG00000005364					ENSMUSG00000042419					ENSMUSG00000037827
																					ENSMUSG00000013736					ENSMUSG00000081650					ENSMUSG00000030363
																					ENSMUSG00000005362					ENSMUSG00000024403					ENSMUSG00000030364
																					ENSMUSG00000064466					ENSMUSG00000019432					ENSMUSG00000079299
																					ENSMUSG00000093127					ENSMUSG00000073411					ENSMUSG00000030325
																					ENSMUSG00000034648					ENSMUSG00000079507					ENSMUSG00000079298
																					ENSMUSG00000085687					ENSMUSG00000091705					ENSMUSG00000090164
																					ENSMUSG00000019767					ENSMUSG00000035929					ENSMUSG00000030365
																					ENSMUSG00000061759					ENSMUSG00000073409					ENSMUSG00000000248
																					ENSMUSG00000019763					ENSMUSG00000060550					ENSMUSG00000030154
																					ENSMUSG00000075327					ENSMUSG00000067235					ENSMUSG00000030155
																					ENSMUSG00000038587					ENSMUSG00000024406					ENSMUSG00000079295
																					ENSMUSG00000040675					ENSMUSG00000050410					ENSMUSG00000030157
																					ENSMUSG00000084430					ENSMUSG00000040312					ENSMUSG00000030156
																					ENSMUSG00000065371					ENSMUSG00000024409					ENSMUSG00000047720
																					ENSMUSG00000089473					ENSMUSG00000039518					ENSMUSG00000053063
																					ENSMUSG00000065792					ENSMUSG00000039269					ENSMUSG00000030158
																					ENSMUSG00000088375					ENSMUSG00000090509					ENSMUSG00000033082
																					ENSMUSG00000082247					ENSMUSG00000090588					ENSMUSG00000030159
																					ENSMUSG00000040624					ENSMUSG00000073408					ENSMUSG00000046080
																					ENSMUSG00000082605					ENSMUSG00000038838					ENSMUSG00000079293
																					ENSMUSG00000082123					ENSMUSG00000001524					ENSMUSG00000030162
																					ENSMUSG00000089392					ENSMUSG00000003534					ENSMUSG00000030160
																					ENSMUSG00000082688					ENSMUSG00000003541					ENSMUSG00000030161
																					ENSMUSG00000081571					ENSMUSG00000059714					ENSMUSG00000050241
																					ENSMUSG00000087245					ENSMUSG00000001525					ENSMUSG00000030165
																					ENSMUSG00000086375					ENSMUSG00000061607					ENSMUSG00000030149
																					ENSMUSG00000056427					ENSMUSG00000059791					ENSMUSG00000033027
																					ENSMUSG00000018846					ENSMUSG00000034595					ENSMUSG00000052736
																					ENSMUSG00000051062					ENSMUSG00000024422					ENSMUSG00000030167
																					ENSMUSG00000018848					ENSMUSG00000050705					ENSMUSG00000067610
																					ENSMUSG00000018849					ENSMUSG00000024426					ENSMUSG00000043932
																					ENSMUSG00000049336					ENSMUSG00000024436					ENSMUSG00000071158
																					ENSMUSG00000065553					ENSMUSG00000039220					ENSMUSG00000014543
																					ENSMUSG00000065173					ENSMUSG00000038762					ENSMUSG00000092047
																					ENSMUSG00000092992					ENSMUSG00000038500					ENSMUSG00000030173
																					ENSMUSG00000087388					ENSMUSG00000024429					ENSMUSG00000061769
																					ENSMUSG00000085951					ENSMUSG00000092604					ENSMUSG00000079852
																					ENSMUSG00000085533					ENSMUSG00000053835					ENSMUSG00000089727
																					ENSMUSG00000086170					ENSMUSG00000092126					ENSMUSG00000079282
																					ENSMUSG00000086791					ENSMUSG00000067212					ENSMUSG00000033024
																					ENSMUSG00000084889					ENSMUSG00000056116					ENSMUSG00000079281
																					ENSMUSG00000084307					ENSMUSG00000073407					ENSMUSG00000067599
																					ENSMUSG00000085239					ENSMUSG00000079492					ENSMUSG00000072718
																					ENSMUSG00000082614					ENSMUSG00000073406					ENSMUSG00000067591
																					ENSMUSG00000083662					ENSMUSG00000079491					ENSMUSG00000079853
																					ENSMUSG00000055456					ENSMUSG00000092277					ENSMUSG00000081935
																					ENSMUSG00000055415					ENSMUSG00000092243					ENSMUSG00000089728
																					ENSMUSG00000020415					ENSMUSG00000038311					ENSMUSG00000085930
																					ENSMUSG00000020409					ENSMUSG00000073402					ENSMUSG00000083848
																					ENSMUSG00000046491					ENSMUSG00000092478					ENSMUSG00000082069
																					ENSMUSG00000044707					ENSMUSG00000054128					ENSMUSG00000083120
																					ENSMUSG00000045877					ENSMUSG00000024446					ENSMUSG00000072717
																					ENSMUSG00000020405					ENSMUSG00000045409					ENSMUSG00000072721
																					ENSMUSG00000044950					ENSMUSG00000023083					ENSMUSG00000030178
																					ENSMUSG00000041278					ENSMUSG00000024448					ENSMUSG00000084204
																					ENSMUSG00000050541					ENSMUSG00000058124					ENSMUSG00000082777
																					ENSMUSG00000084627					ENSMUSG00000048231					ENSMUSG00000058700
																					ENSMUSG00000065601					ENSMUSG00000037537					ENSMUSG00000085786
																					ENSMUSG00000020361					ENSMUSG00000092508					ENSMUSG00000079223
																					ENSMUSG00000018239					ENSMUSG00000092278					ENSMUSG00000087150
																					ENSMUSG00000049470					ENSMUSG00000092438					ENSMUSG00000082694
																					ENSMUSG00000036216					ENSMUSG00000091655					ENSMUSG00000091870
																					ENSMUSG00000044894					ENSMUSG00000092253					ENSMUSG00000090617
																					ENSMUSG00000018238					ENSMUSG00000079505					ENSMUSG00000088238
																					ENSMUSG00000072963					ENSMUSG00000055413					ENSMUSG00000089383
																					ENSMUSG00000018387					ENSMUSG00000093620					ENSMUSG00000088110
																					ENSMUSG00000049427					ENSMUSG00000092203					ENSMUSG00000088003
																					ENSMUSG00000044352					ENSMUSG00000092231					ENSMUSG00000076212
																					ENSMUSG00000054450					ENSMUSG00000092437					ENSMUSG00000089590
																					ENSMUSG00000018398					ENSMUSG00000044538					ENSMUSG00000088426
																					ENSMUSG00000018395					ENSMUSG00000092290					ENSMUSG00000089474
																					ENSMUSG00000000869					ENSMUSG00000092493					ENSMUSG00000088520
																					ENSMUSG00000020383					ENSMUSG00000092296					ENSMUSG00000048897
																					ENSMUSG00000020380					ENSMUSG00000092414					ENSMUSG00000039099
																					ENSMUSG00000036117					ENSMUSG00000092332					ENSMUSG00000030541
																					ENSMUSG00000018899					ENSMUSG00000092606					ENSMUSG00000039187
																					ENSMUSG00000091191					ENSMUSG00000092502					ENSMUSG00000030544
																					ENSMUSG00000081769					ENSMUSG00000092392					ENSMUSG00000030543
																					ENSMUSG00000078860					ENSMUSG00000092317					ENSMUSG00000039062
																					ENSMUSG00000018900					ENSMUSG00000092555					ENSMUSG00000039176
																					ENSMUSG00000063652					ENSMUSG00000092557					ENSMUSG00000030549
																					ENSMUSG00000020334					ENSMUSG00000073415					ENSMUSG00000046591
																					ENSMUSG00000082263					ENSMUSG00000092241					ENSMUSG00000063801
																					ENSMUSG00000085707					ENSMUSG00000090936					ENSMUSG00000039043
																					ENSMUSG00000085718					ENSMUSG00000086076					ENSMUSG00000085554
																					ENSMUSG00000086851					ENSMUSG00000092444					ENSMUSG00000090948
																					ENSMUSG00000084373					ENSMUSG00000092543					ENSMUSG00000091217
																					ENSMUSG00000086595					ENSMUSG00000092200					ENSMUSG00000050382
																					ENSMUSG00000083986					ENSMUSG00000015451					ENSMUSG00000039133
																					ENSMUSG00000082271					ENSMUSG00000092198					ENSMUSG00000030546
																					ENSMUSG00000082380					ENSMUSG00000092215					ENSMUSG00000082400
																					ENSMUSG00000081098					ENSMUSG00000093516					ENSMUSG00000030545
																					ENSMUSG00000080768					ENSMUSG00000092409					ENSMUSG00000077059
																					ENSMUSG00000084419					ENSMUSG00000092389					ENSMUSG00000093238
																					ENSMUSG00000064719					ENSMUSG00000086867					ENSMUSG00000091411
																					ENSMUSG00000020388					ENSMUSG00000092219					ENSMUSG00000032251
																					ENSMUSG00000018906					ENSMUSG00000092600					ENSMUSG00000032253
																					ENSMUSG00000036045					ENSMUSG00000092171					ENSMUSG00000066456
																					ENSMUSG00000086209					ENSMUSG00000087443					ENSMUSG00000032258
																					ENSMUSG00000018916					ENSMUSG00000084998					ENSMUSG00000090403
																					ENSMUSG00000018914					ENSMUSG00000049832					ENSMUSG00000092026
																					ENSMUSG00000020333					ENSMUSG00000092284					ENSMUSG00000058838
																					ENSMUSG00000020332					ENSMUSG00000092368					ENSMUSG00000032261
																					ENSMUSG00000035992					ENSMUSG00000092254					ENSMUSG00000032262
																					ENSMUSG00000037533					ENSMUSG00000078821					ENSMUSG00000038379
																					ENSMUSG00000052298					ENSMUSG00000092365					ENSMUSG00000090522
																					ENSMUSG00000020268					ENSMUSG00000091373					ENSMUSG00000032263
																					ENSMUSG00000020267					ENSMUSG00000092304					ENSMUSG00000064469
																					ENSMUSG00000018339					ENSMUSG00000092224					ENSMUSG00000077415
																					ENSMUSG00000020400					ENSMUSG00000073405					ENSMUSG00000077666
																					ENSMUSG00000018340					ENSMUSG00000073980					ENSMUSG00000019907
																					ENSMUSG00000049588					ENSMUSG00000092630					ENSMUSG00000035873
																					ENSMUSG00000000594					ENSMUSG00000073403					ENSMUSG00000093762
																					ENSMUSG00000049491					ENSMUSG00000092366					ENSMUSG00000065653
																					ENSMUSG00000020264					ENSMUSG00000092289					ENSMUSG00000035864
																					ENSMUSG00000020261					ENSMUSG00000092474					ENSMUSG00000020181
																					ENSMUSG00000060068					ENSMUSG00000092374					ENSMUSG00000065802
																					ENSMUSG00000085585					ENSMUSG00000092480					ENSMUSG00000088554
																					ENSMUSG00000085888					ENSMUSG00000092240					ENSMUSG00000006764
																					ENSMUSG00000078151					ENSMUSG00000092306					ENSMUSG00000020130
																					ENSMUSG00000084212					ENSMUSG00000092457					ENSMUSG00000020132
																					ENSMUSG00000086039					ENSMUSG00000092265					ENSMUSG00000069520
																					ENSMUSG00000082503					ENSMUSG00000092362					ENSMUSG00000087853
																					ENSMUSG00000086789					ENSMUSG00000060087					ENSMUSG00000020137
																					ENSMUSG00000082180					ENSMUSG00000092428					ENSMUSG00000034163
																					ENSMUSG00000044751					ENSMUSG00000092612					ENSMUSG00000020102
																					ENSMUSG00000080738					ENSMUSG00000092363					ENSMUSG00000020105
																					ENSMUSG00000085531					ENSMUSG00000092560					ENSMUSG00000025436
																					ENSMUSG00000084980					ENSMUSG00000084750					ENSMUSG00000078429
																					ENSMUSG00000093341					ENSMUSG00000075770					ENSMUSG00000019467
																					ENSMUSG00000088437					ENSMUSG00000084751					ENSMUSG00000040502
																					ENSMUSG00000088231					ENSMUSG00000092687					ENSMUSG00000025410
																					ENSMUSG00000076662					ENSMUSG00000064853					ENSMUSG00000086597
																					ENSMUSG00000076663					ENSMUSG00000065273					ENSMUSG00000080115
																					ENSMUSG00000076664					ENSMUSG00000092678					ENSMUSG00000006732
																					ENSMUSG00000076665					ENSMUSG00000065774					ENSMUSG00000025432
																					ENSMUSG00000076666					ENSMUSG00000093009					ENSMUSG00000006728
																					ENSMUSG00000076667					ENSMUSG00000065139					ENSMUSG00000040462
																					ENSMUSG00000076668					ENSMUSG00000077807					ENSMUSG00000025417
																					ENSMUSG00000076670					ENSMUSG00000077931					ENSMUSG00000074657
																					ENSMUSG00000076671					ENSMUSG00000067201					ENSMUSG00000040415
																					ENSMUSG00000076672					ENSMUSG00000037334					ENSMUSG00000006731
																					ENSMUSG00000076673					ENSMUSG00000092485					ENSMUSG00000040441
																					ENSMUSG00000076674					ENSMUSG00000092298					ENSMUSG00000006736
																					ENSMUSG00000087582					ENSMUSG00000092377					ENSMUSG00000025422
																					ENSMUSG00000076676					ENSMUSG00000092172					ENSMUSG00000006724
																					ENSMUSG00000076677					ENSMUSG00000092343					ENSMUSG00000040521
																					ENSMUSG00000076680					ENSMUSG00000092435					ENSMUSG00000065430
																					ENSMUSG00000078991					ENSMUSG00000092521					ENSMUSG00000089550
																					ENSMUSG00000076683					ENSMUSG00000092385					ENSMUSG00000093161
																					ENSMUSG00000076684					ENSMUSG00000092460					ENSMUSG00000072837
																					ENSMUSG00000076685					ENSMUSG00000040771					ENSMUSG00000088672
																					ENSMUSG00000076686					ENSMUSG00000043740					ENSMUSG00000092593
																					ENSMUSG00000076687					ENSMUSG00000023994					ENSMUSG00000092384
																					ENSMUSG00000076688					ENSMUSG00000023992					ENSMUSG00000025407
																					ENSMUSG00000076689					ENSMUSG00000023993					ENSMUSG00000025409
																					ENSMUSG00000076691					ENSMUSG00000071068					ENSMUSG00000025408
																					ENSMUSG00000090765					ENSMUSG00000041754					ENSMUSG00000047492
																					ENSMUSG00000076692					ENSMUSG00000051682					ENSMUSG00000025405
																					ENSMUSG00000076693					ENSMUSG00000043939					ENSMUSG00000040345
																					ENSMUSG00000076695					ENSMUSG00000021545					ENSMUSG00000025404
																					ENSMUSG00000076696					ENSMUSG00000073386					ENSMUSG00000040354
																					ENSMUSG00000076697					ENSMUSG00000042265					ENSMUSG00000089369
																					ENSMUSG00000076698					ENSMUSG00000040694					ENSMUSG00000020390
																					ENSMUSG00000076699					ENSMUSG00000023995					ENSMUSG00000020389
																					ENSMUSG00000076700					ENSMUSG00000043592					ENSMUSG00000020349
																					ENSMUSG00000076701					ENSMUSG00000088483					ENSMUSG00000062204
																					ENSMUSG00000076694					ENSMUSG00000077708					ENSMUSG00000060170
																					ENSMUSG00000076702					ENSMUSG00000023927					ENSMUSG00000036309
																					ENSMUSG00000078971					ENSMUSG00000032845					ENSMUSG00000000782
																					ENSMUSG00000076703					ENSMUSG00000073546					ENSMUSG00000020402
																					ENSMUSG00000076704					ENSMUSG00000032688					ENSMUSG00000036275
																					ENSMUSG00000076705					ENSMUSG00000042439					ENSMUSG00000087101
																					ENSMUSG00000076706					ENSMUSG00000093783					ENSMUSG00000086493
																					ENSMUSG00000076707					ENSMUSG00000093283					ENSMUSG00000084800
																					ENSMUSG00000076708					ENSMUSG00000093347					ENSMUSG00000084141
																					ENSMUSG00000076709										ENSMUSG00000083175
																					ENSMUSG00000076710										ENSMUSG00000086920
																					ENSMUSG00000076711										ENSMUSG00000086395
																					ENSMUSG00000076712										ENSMUSG00000092028
																					ENSMUSG00000076713										ENSMUSG00000093006
																					ENSMUSG00000076714										ENSMUSG00000092870
																					ENSMUSG00000076715										ENSMUSG00000073233
																					ENSMUSG00000076716										ENSMUSG00000090299
																					ENSMUSG00000076717										ENSMUSG00000020609
																					ENSMUSG00000076718										ENSMUSG00000093053
																					ENSMUSG00000076719										ENSMUSG00000021175
																					ENSMUSG00000076720										ENSMUSG00000018581
																					ENSMUSG00000076721										ENSMUSG00000093544
																					ENSMUSG00000076722										ENSMUSG00000088593
																					ENSMUSG00000090959										ENSMUSG00000025323
																					ENSMUSG00000091241										ENSMUSG00000088797
																					ENSMUSG00000076723										ENSMUSG00000065348
																					ENSMUSG00000076724										ENSMUSG00000048562
																					ENSMUSG00000076725										ENSMUSG00000072791
																					ENSMUSG00000076726										ENSMUSG00000034617
																					ENSMUSG00000076727										ENSMUSG00000021532
																					ENSMUSG00000076728										ENSMUSG00000021534
																					ENSMUSG00000076729										ENSMUSG00000021536
																					ENSMUSG00000076730										ENSMUSG00000087471
																					ENSMUSG00000076731										ENSMUSG00000082967
																					ENSMUSG00000091301										ENSMUSG00000021871
																					ENSMUSG00000076732										ENSMUSG00000068417
																					ENSMUSG00000076733										ENSMUSG00000021872
																					ENSMUSG00000057610										ENSMUSG00000035953
																					ENSMUSG00000076734										ENSMUSG00000061244
																					ENSMUSG00000091087										ENSMUSG00000036291
																					ENSMUSG00000076735										ENSMUSG00000036282
																					ENSMUSG00000042063										ENSMUSG00000021850
																					ENSMUSG00000011171										ENSMUSG00000021852
																					ENSMUSG00000042050										ENSMUSG00000079246
																					ENSMUSG00000078984										ENSMUSG00000036242
																					ENSMUSG00000021171										ENSMUSG00000048933
																					ENSMUSG00000091262										ENSMUSG00000090343
																					ENSMUSG00000042029										ENSMUSG00000091220
																					ENSMUSG00000093765										ENSMUSG00000068437
																					ENSMUSG00000091100										ENSMUSG00000060523
																					ENSMUSG00000091843										ENSMUSG00000059488
																					ENSMUSG00000092156										ENSMUSG00000050030
																					ENSMUSG00000091338										ENSMUSG00000049011
																					ENSMUSG00000076738										ENSMUSG00000050431
																					ENSMUSG00000076739										ENSMUSG00000048080
																					ENSMUSG00000076740										ENSMUSG00000091873
																					ENSMUSG00000076741										ENSMUSG00000090874
																					ENSMUSG00000076742										ENSMUSG00000045306
																					ENSMUSG00000076743										ENSMUSG00000046210
																					ENSMUSG00000065685										ENSMUSG00000051969
																					ENSMUSG00000084629										ENSMUSG00000047716
																					ENSMUSG00000068167										ENSMUSG00000049601
																					ENSMUSG00000059920										ENSMUSG00000057903
																					ENSMUSG00000047141										ENSMUSG00000068433
																					ENSMUSG00000054604										ENSMUSG00000060108
																					ENSMUSG00000050783										ENSMUSG00000068431
																					ENSMUSG00000004842										ENSMUSG00000062237
																					ENSMUSG00000004843										ENSMUSG00000053815
																					ENSMUSG00000077011										ENSMUSG00000050028
																					ENSMUSG00000093149										ENSMUSG00000058188
																					ENSMUSG00000089178										ENSMUSG00000057179
																					ENSMUSG00000052516										ENSMUSG00000060084
																					ENSMUSG00000076284										ENSMUSG00000059069
																					ENSMUSG00000089033										ENSMUSG00000006288
																															ENSMUSG00000078125
																															ENSMUSG00000071470
																															ENSMUSG00000036023
																															ENSMUSG00000006281
																															ENSMUSG00000090799
																															ENSMUSG00000091089
																															ENSMUSG00000006289
																															ENSMUSG00000035960
																															ENSMUSG00000092837
																															ENSMUSG00000089187
																															ENSMUSG00000088385
																															ENSMUSG00000088938
																															ENSMUSG00000089416
																															ENSMUSG00000064975
																															ENSMUSG00000021996
																															ENSMUSG00000068015
																															ENSMUSG00000034959
																															ENSMUSG00000021997
																															ENSMUSG00000021998
																															ENSMUSG00000021999
																															ENSMUSG00000022000
																															ENSMUSG00000091722
																															ENSMUSG00000034913
																															ENSMUSG00000022002
																															ENSMUSG00000034893
																															ENSMUSG00000022003
																															ENSMUSG00000060126
																															ENSMUSG00000067995
																															ENSMUSG00000046523
																															ENSMUSG00000022008
																															ENSMUSG00000022009
																															ENSMUSG00000075515
																															ENSMUSG00000089733
																															ENSMUSG00000090054
																															ENSMUSG00000085829
																															ENSMUSG00000034997
																															ENSMUSG00000065799
																															ENSMUSG00000065147
																															ENSMUSG00000089405
																															ENSMUSG00000064394
																															ENSMUSG00000089320
																															ENSMUSG00000022336
																															ENSMUSG00000072592
																															ENSMUSG00000022337
																															ENSMUSG00000054409
																															ENSMUSG00000038760
																															ENSMUSG00000038736
																															ENSMUSG00000088756
																															ENSMUSG00000088831
																															ENSMUSG00000077181
																															ENSMUSG00000087905
																															ENSMUSG00000022338
																															ENSMUSG00000038725
																															ENSMUSG00000065855
																															ENSMUSG00000023826
																															ENSMUSG00000023827
																															ENSMUSG00000014426
																															ENSMUSG00000079716
																															ENSMUSG00000063911
																															ENSMUSG00000078247
																															ENSMUSG00000059481
																															ENSMUSG00000089769
																															ENSMUSG00000089817
																															ENSMUSG00000089695
																															ENSMUSG00000023828
																															ENSMUSG00000040966
																															ENSMUSG00000023829
																															ENSMUSG00000023830
																															ENSMUSG00000091640
																															ENSMUSG00000068037
																															ENSMUSG00000059408
																															ENSMUSG00000073460
																															ENSMUSG00000057388
																															ENSMUSG00000068039
																															ENSMUSG00000062480
																															ENSMUSG00000023832
																															ENSMUSG00000060475
																															ENSMUSG00000006818
																															ENSMUSG00000071311
																															ENSMUSG00000091214
																															ENSMUSG00000089525
																															ENSMUSG00000065105
																															ENSMUSG00000077476
																															ENSMUSG00000092913
																															ENSMUSG00000064637
																															ENSMUSG00000055602
																															ENSMUSG00000067049
																															ENSMUSG00000088330
																															ENSMUSG00000050088
																															ENSMUSG00000023883
																															ENSMUSG00000079710
																															ENSMUSG00000079709
																															ENSMUSG00000036648
																															ENSMUSG00000073455
																															ENSMUSG00000079707
																															ENSMUSG00000036552
																															ENSMUSG00000087655
																															ENSMUSG00000014773
																															ENSMUSG00000014763
																															ENSMUSG00000085544
																															ENSMUSG00000014769
																															ENSMUSG00000091229
																															ENSMUSG00000014771
																															ENSMUSG00000014767
																															ENSMUSG00000051977
																															ENSMUSG00000053477
																															ENSMUSG00000064032
																															ENSMUSG00000024735
																															ENSMUSG00000037418
																															ENSMUSG00000024661
																															ENSMUSG00000024660
																															ENSMUSG00000035735
																															ENSMUSG00000024743
																															ENSMUSG00000024663
																															ENSMUSG00000024664
																															ENSMUSG00000024665
																															ENSMUSG00000010663
																															ENSMUSG00000024742
																															ENSMUSG00000036372
																															ENSMUSG00000036098
																															ENSMUSG00000090291
																															ENSMUSG00000035179
																															ENSMUSG00000024668
																															ENSMUSG00000034820
																															ENSMUSG00000024667
																															ENSMUSG00000024666
																															ENSMUSG00000034445
																															ENSMUSG00000034371
																															ENSMUSG00000024740
																															ENSMUSG00000043789
																															ENSMUSG00000024738
																															ENSMUSG00000048832
																															ENSMUSG00000024669
																															ENSMUSG00000067577
																															ENSMUSG00000024670
																															ENSMUSG00000091317
																															ENSMUSG00000024737
																															ENSMUSG00000024736
																															ENSMUSG00000034659
																															ENSMUSG00000024734
																															ENSMUSG00000034117
																															ENSMUSG00000024732
																															ENSMUSG00000024731
																															ENSMUSG00000067571
																															ENSMUSG00000075010
																															ENSMUSG00000024730
																															ENSMUSG00000079226
																															ENSMUSG00000024729
																															ENSMUSG00000024728
																															ENSMUSG00000076370
																															ENSMUSG00000080659
																															ENSMUSG00000057240
																															ENSMUSG00000085490
																															ENSMUSG00000058078
																															ENSMUSG00000059105
																															ENSMUSG00000057270
																															ENSMUSG00000056858
																															ENSMUSG00000045395
																															ENSMUSG00000044040
																															ENSMUSG00000071630
																															ENSMUSG00000058949
																															ENSMUSG00000056670
																															ENSMUSG00000058800
																															ENSMUSG00000052277
																															ENSMUSG00000062199
																															ENSMUSG00000062936
																															ENSMUSG00000049015
																															ENSMUSG00000063777
																															ENSMUSG00000062195
																															ENSMUSG00000071629
																															ENSMUSG00000063485
																															ENSMUSG00000057213
																															ENSMUSG00000057950
																															ENSMUSG00000045678
																															ENSMUSG00000061387
																															ENSMUSG00000051156
																															ENSMUSG00000050865
																															ENSMUSG00000047207
																															ENSMUSG00000048356
																															ENSMUSG00000054526
																															ENSMUSG00000062314
																															ENSMUSG00000024642
																															ENSMUSG00000077020
																															ENSMUSG00000077291
																															ENSMUSG00000084675
																															ENSMUSG00000064824
																															ENSMUSG00000077030
																															ENSMUSG00000063586
																															ENSMUSG00000025086
																															ENSMUSG00000054843
