# Supplementary material for: Genetic Variation in the Magnitude and Longevity of the IgG Subclass Response to a Diphtheria-Tetanus-Acellular Pertussis (DTaP) Vaccine in Mice
Source: Vaccines (Basel). 2019 Sep 20;7(4):124. doi: 10.3390/vaccines7040124 (PMC6963843; doi:10.3390/vaccines7040124)
Supplement: Supplementary file 1 [file vaccines-07-00124-s001.zip › Supplemental Data/wk14IgG1_genelist.xlsx]

## Sheet: wk14IgG1DT_genelist
Gene Name	Ensembl Gene ID	Chromosome	Start	End
Hdac4	ENSMUSG00000026313	1	93829334	94044970
Ndufa10	ENSMUSG00000026260	1	94335587	94370437
Olfr1416	ENSMUSG00000067064	1	94376258	94377196
Olfr1415	ENSMUSG00000057464	1	94387395	94388330
Olfr1414	ENSMUSG00000042849	1	94407625	94415092
Olfr1413	ENSMUSG00000058904	1	94469702	94470783
Olfr1412	ENSMUSG00000046300	1	94484909	94485874
Olfr1411	ENSMUSG00000062497	1	94493098	94494069
Olfr1410	ENSMUSG00000063583	1	94504416	94505424
Olfr12	ENSMUSG00000061616	1	94516458	94517578
Myeov2	ENSMUSG00000073616	1	94533722	94538562
Otos	ENSMUSG00000044055	1	94540795	94545418
Gpc1	ENSMUSG00000034220	1	94728222	94756775
Ankmy1	ENSMUSG00000034212	1	94766706	94799483
Dusp28	ENSMUSG00000047067	1	94803566	94805197
Rnpepl1	ENSMUSG00000026269	1	94807982	94817415
Capn10	ENSMUSG00000026270	1	94830953	94844518
Gpr35	ENSMUSG00000026271	1	94869696	94882968
Aqp12	ENSMUSG00000045091	1	94902911	94908846
Kif1a	ENSMUSG00000014602	1	94912033	94998442
Gm17672	ENSMUSG00000090847	1	95005394	95007262
Agxt	ENSMUSG00000026272	1	95031822	95041984
2310007B03Rik	ENSMUSG00000034159	1	95047926	95057525
E030010N08Rik	ENSMUSG00000084989	1	95112476	95127649
Sned1	ENSMUSG00000047793	1	95132418	95197642
Mterfd2	ENSMUSG00000026273	1	95195788	95202492
Pask	ENSMUSG00000026274	1	95205347	95240059
Ppp1r7	ENSMUSG00000026275	1	95239431	95270066
Ano7	ENSMUSG00000034107	1	95270473	95300079
Hdlbp	ENSMUSG00000034088	1	95302517	95375385
Gm17415	ENSMUSG00000090489	1	95318265	95319065
Sept2	ENSMUSG00000026276	1	95375541	95406837
Farp2	ENSMUSG00000034066	1	95408656	95518553
Stk25	ENSMUSG00000026277	1	95518479	95532299
Bok	ENSMUSG00000026278	1	95582271	95592339
Thap4	ENSMUSG00000026279	1	95601968	95651415
Atg4b	ENSMUSG00000026280	1	95648077	95686372
Dtymk	ENSMUSG00000026281	1	95689153	95698511
Ing5	ENSMUSG00000026283	1	95700542	95718678
D2hgdh	ENSMUSG00000073609	1	95721817	95748925
Gal3st2	ENSMUSG00000034005	1	95757921	95773071
Gm9994	ENSMUSG00000056307	1	95824364	95839221
Gm17418	ENSMUSG00000079420	1	93885628	93889205
5033417F24Rik	ENSMUSG00000091828	1	94804957	94807341
U6	ENSMUSG00000088961	1	95705147	95705248
U6	ENSMUSG00000064389	1	95259832	95259934
Mir149	ENSMUSG00000065470	1	94746955	94747020
AC131316.1	ENSMUSG00000093284	1	95549077	95549367
Slco4c1	ENSMUSG00000040693	1	98715361	98768748
Slco6b1	ENSMUSG00000045463	1	98808389	98894154
Slco6c1	ENSMUSG00000026331	1	98955615	99024830
D1Ertd622e	ENSMUSG00000044768	1	99540480	99558651
Ppip5k2	ENSMUSG00000040648	1	99602625	99666988
Slco6b1	ENSMUSG00000090974	1	98802753	98894154
Gm6430	ENSMUSG00000044757	1	98921090	98923123
Gm5101	ENSMUSG00000092052	1	98768798	98777807
AC102463.2	ENSMUSG00000077860	1	98163428	98163518
U6	ENSMUSG00000064461	1	98513676	98513782
AC102463.1	ENSMUSG00000077014	1	98199723	98199832
U6	ENSMUSG00000065342	1	97728706	97728812
SNORA17	ENSMUSG00000077255	1	98658608	98658735
Gpr39	ENSMUSG00000026343	1	127573572	127770439
Lypd1	ENSMUSG00000026344	1	127764199	127809678
Nckap5	ENSMUSG00000049690	1	127810197	128727376
Mgat5	ENSMUSG00000036155	1	129101563	129380281
Tmem163	ENSMUSG00000026347	1	129383123	129574673
AC164156.1	ENSMUSG00000080345	1	128364712	128364801
AC131793.1	ENSMUSG00000093146	1	129228389	129228518
snoU6-53	ENSMUSG00000065687	1	129271708	129271816
Gm5263	ENSMUSG00000090323	1	148267564	148268004
Fam5c	ENSMUSG00000035131	1	148342759	148749602
Gm15583	ENSMUSG00000080078	1	148572711	148576220
A230059L01Rik	ENSMUSG00000087627	1	148650095	148653152
Gm15584	ENSMUSG00000085822	1	148656961	148688826
SNORA17	ENSMUSG00000088579	1	147138484	147138610
Gm9931	ENSMUSG00000053988	1	149127888	149129072
SNORA17	ENSMUSG00000088582	1	150174110	150174238
Acbd6	ENSMUSG00000033701	1	157405250	157534363
Lhx4	ENSMUSG00000026468	1	157545166	157589250
Qsox1	ENSMUSG00000033684	1	157625285	157660013
Cep350	ENSMUSG00000033671	1	157692096	157820020
Tor1aip1	ENSMUSG00000026466	1	157851729	157883610
Tor1aip2	ENSMUSG00000050565	1	157882533	157915991
Tor1aip2	ENSMUSG00000079252	1	157882856	157900866
Fam163a	ENSMUSG00000015484	1	157923096	158135156
Nphs2	ENSMUSG00000026602	1	158240858	158258166
9430070O13Rik	ENSMUSG00000026601	1	158295060	158330121
Gm2000	ENSMUSG00000078193	1	158296169	158296613
Soat1	ENSMUSG00000026600	1	158358239	158404459
Abl2	ENSMUSG00000026596	1	158488917	158579699
Tor3a	ENSMUSG00000060519	1	158583748	158604487
Fam20b	ENSMUSG00000033557	1	158608676	158649132
Ralgps2	ENSMUSG00000026594	1	158734297	158869757
Angptl1	ENSMUSG00000033544	1	158768693	158791209
1700057K13Rik	ENSMUSG00000026592	1	159029279	159038811
Rasal2	ENSMUSG00000070565	1	159065314	159342726
2810025M15Rik	ENSMUSG00000049881	1	159342483	159350366
BC026585	ENSMUSG00000033488	1	159388711	159419191
Sec16b	ENSMUSG00000026589	1	159436859	159498556
Tdrd5	ENSMUSG00000060985	1	158185426	158233795
Gm10031	ENSMUSG00000057808	1	158454362	158455283
Gm15428	ENSMUSG00000046057	1	158723643	158723975
Gm6058	ENSMUSG00000087632	1	159314062	159314460
Gm15486	ENSMUSG00000087093	1	159428006	159441852
U2	ENSMUSG00000077419	1	157801704	157801852
Mael	ENSMUSG00000040629	1	168131516	168168875
Ildr2	ENSMUSG00000040612	1	168184270	168246954
5330438I03Rik	ENSMUSG00000091393	1	168236872	168239716
Tada1	ENSMUSG00000026563	1	168309228	168323752
Pogk	ENSMUSG00000040596	1	168314753	168339994
Gm4846	ENSMUSG00000086056	1	168413744	168427719
Gm4847	ENSMUSG00000051081	1	168559102	168577824
Fmo9	ENSMUSG00000026560	1	168592186	168611976
Fam78b	ENSMUSG00000060568	1	168931548	169021433
Uck2	ENSMUSG00000053664	1	169153958	169154050
Uck2	ENSMUSG00000026558	1	169156221	169215258
Tmco1	ENSMUSG00000052428	1	169238801	169264109
Aldh9a1	ENSMUSG00000026687	1	169280122	169298661
Mgst3	ENSMUSG00000026688	1	169302097	169323972
Lrrc52	ENSMUSG00000040485	1	169375806	169396911
Rxrg	ENSMUSG00000015843	1	169528515	169569754
Lmx1a	ENSMUSG00000026686	1	169619370	169778872
Pbx1	ENSMUSG00000052534	1	170050130	170362401
Gm15853	ENSMUSG00000089853	1	168309970	168310624
Gm16418	ENSMUSG00000084093	1	168361836	168362006
Gm4954	ENSMUSG00000085841	1	168692276	168700616
Gm6286	ENSMUSG00000086925	1	168875728	168876489
RP23-45N11.1	ENSMUSG00000093538	1	170045375	170052596
Gm16701	ENSMUSG00000086622	1	168904155	168930972
U6	ENSMUSG00000064426	1	169279156	169279262
mmu-mir-2134-1	ENSMUSG00000088246	1	169270500	169270555
mmu-mir-1194	ENSMUSG00000080682	1	168550493	168550613
Ddr2	ENSMUSG00000026674	1	171902439	172040632
Uap1	ENSMUSG00000026670	1	172072069	172105088
Uhmk1	ENSMUSG00000026667	1	172123551	172145528
4930500M09Rik	ENSMUSG00000044306	1	172144991	172145687
Sh2d1b2	ENSMUSG00000073494	1	172162880	172183739
Sh2d1b1	ENSMUSG00000026673	1	172207507	172216900
Gm7694	ENSMUSG00000079188	1	172231277	172232958
Nos1ap	ENSMUSG00000038473	1	172232799	172519992
1700015E13Rik	ENSMUSG00000042800	1	172238934	172242256
Olfml2b	ENSMUSG00000038463	1	172574663	172612920
Atf6	ENSMUSG00000026663	1	172634588	172797902
Dusp12	ENSMUSG00000026659	1	172803629	172815671
Fcrlb	ENSMUSG00000070524	1	172837404	172843072
Fcrla	ENSMUSG00000038421	1	172847707	172857714
Fcgr2b	ENSMUSG00000026656	1	172890689	172906678
Fcgr4	ENSMUSG00000059089	1	172949051	172959892
Fcgr3	ENSMUSG00000059498	1	172981300	172995066
1700009P17Rik	ENSMUSG00000026649	1	173044049	173057098
Sdhc	ENSMUSG00000058076	1	173057296	173080734
Mpz	ENSMUSG00000056569	1	173080842	173091261
Pcp4l1	ENSMUSG00000038370	1	173103393	173126399
Nr1i3	ENSMUSG00000005677	1	173144101	173150832
Tomm40l	ENSMUSG00000005674	1	173147933	173152645
Apoa2	ENSMUSG00000005681	1	173155185	173156510
Fcer1g	ENSMUSG00000058715	1	173159703	173164496
Ndufs2	ENSMUSG00000013593	1	173164984	173177253
Adamts4	ENSMUSG00000006403	1	173180552	173190768
B4galt3	ENSMUSG00000052423	1	173200459	173207027
Ppox	ENSMUSG00000062729	1	173206121	173211317
Usp21	ENSMUSG00000053483	1	173212076	173218122
Ufc1	ENSMUSG00000062963	1	173218694	173225155
Rpl27-ps1	ENSMUSG00000079137	1	173235215	173235625
Dedd	ENSMUSG00000013973	1	173259276	173272462
Nit1	ENSMUSG00000013997	1	173268139	173275777
Pfdn2	ENSMUSG00000006412	1	173275801	173289385
Klhdc9	ENSMUSG00000045259	1	173288577	173290929
Pvrl4	ENSMUSG00000006411	1	173300230	173318729
Arhgap30	ENSMUSG00000048865	1	173319085	173340429
Usf1	ENSMUSG00000026641	1	173341444	173349273
Tstd1	ENSMUSG00000091166	1	173349164	173350483
F11r	ENSMUSG00000038235	1	173367666	173394734
B930036N10Rik	ENSMUSG00000091993	1	173432927	173434242
Alyref2	ENSMUSG00000060244	1	173433609	173434881
Gm9765	ENSMUSG00000038218	1	173445364	173447053
Itln1	ENSMUSG00000038209	1	173448253	173465425
Cd244	ENSMUSG00000004709	1	173489324	173515449
Ly9	ENSMUSG00000004707	1	173518755	173537541
Slamf7	ENSMUSG00000038179	1	173562534	173579149
Cd48	ENSMUSG00000015355	1	173612140	173635389
Slamf1	ENSMUSG00000015316	1	173697258	173731315
Cd84	ENSMUSG00000038147	1	173769828	173820849
Gm10521	ENSMUSG00000073492	1	173825795	173828368
Slamf6	ENSMUSG00000015314	1	173847646	173879083
Vangl2	ENSMUSG00000026556	1	173931091	173958575
Nhlh1	ENSMUSG00000051251	1	173982423	173987704
Ncstn	ENSMUSG00000003458	1	173996144	174012926
Copa	ENSMUSG00000026553	1	174012660	174052461
Gm9929	ENSMUSG00000053925	1	172798776	172811852
Gm2962	ENSMUSG00000089838	1	172855440	172855775
Gm15431	ENSMUSG00000059058	1	173641219	173641413
Gm17520	ENSMUSG00000092117	1	173353316	173367449
U6	ENSMUSG00000064448	1	172762896	172763002
U5	ENSMUSG00000065033	1	173433179	173433294
U6	ENSMUSG00000065390	1	173663430	173663536
SNORA40	ENSMUSG00000087747	1	173238178	173238268
U6	ENSMUSG00000064611	1	172681848	172681954
U6	ENSMUSG00000088291	1	173662191	173662245
U1	ENSMUSG00000065905	1	172958096	172958260
Pex19	ENSMUSG00000003464	1	174056886	174066624
Dcaf8	ENSMUSG00000026554	1	174078146	174126524
Gm10171	ENSMUSG00000089803	1	174074403	174075032
Pea15a	ENSMUSG00000013698	1	174126859	174136935
Casq1	ENSMUSG00000007122	1	174140025	174150026
Atp1a4	ENSMUSG00000007107	1	174153644	174188545
Igsf8	ENSMUSG00000038034	1	174191772	174249972
Atp1a2	ENSMUSG00000007097	1	174201840	174228195
Kcnj9	ENSMUSG00000038026	1	174251164	174259394
Kcnj10	ENSMUSG00000044708	1	174271341	174304216
Gm17224	ENSMUSG00000092085	1	174143152	174143811
Pigm	ENSMUSG00000050229	1	174306662	174314230
Slamf9	ENSMUSG00000026548	1	174405489	174408706
Igsf9	ENSMUSG00000037995	1	174411919	174429009
Tagln2	ENSMUSG00000026547	1	174430178	174437511
Ccdc19	ENSMUSG00000026546	1	174451175	174476001
Vsig8	ENSMUSG00000049598	1	174486069	174493848
Slamf8	ENSMUSG00000053318	1	174511508	174520699
Fcrl6	ENSMUSG00000070504	1	174526771	174532682
4933439K11Rik	ENSMUSG00000085184	1	174468264	174488260
Dusp23	ENSMUSG00000026544	1	174560900	174563105
Crp	ENSMUSG00000037942	1	174628187	174630097
Apcs	ENSMUSG00000026542	1	174824093	174825185
Olfr16	ENSMUSG00000037924	1	174886899	174887948
7SK	ENSMUSG00000088813	1	174614646	174614972
SNORA17	ENSMUSG00000077252	1	174866343	174866465
U6	ENSMUSG00000070182	1	174773665	174773769
Olfr1408	ENSMUSG00000062527	1	175060331	175061367
Olfr1406	ENSMUSG00000058981	1	175113573	175114635
Olfr218	ENSMUSG00000046643	1	175133489	175134430
Olfr1404	ENSMUSG00000049456	1	175145738	175146771
Olfr1407-ps1	ENSMUSG00000066680	1	175080262	175080503
Fcer1a	ENSMUSG00000005339	1	175151402	175157360
Olfr418-ps1	ENSMUSG00000049605	1	175200278	175201268
Gm11062	ENSMUSG00000079180	1	175204592	175207853
Darc	ENSMUSG00000037872	1	175262017	175263634
Cadm3	ENSMUSG00000005338	1	175264385	175297826
Aim2	ENSMUSG00000037860	1	175281010	175396171
Gm4955	ENSMUSG00000037849	1	175398640	175421172
BC094916	ENSMUSG00000070501	1	175449848	175466088
Pydc4	ENSMUSG00000073491	1	175497204	175529405
Pyhin1	ENSMUSG00000043263	1	175560990	175578059
Pydc3	ENSMUSG00000066677	1	175604042	175628523
AI607873	ENSMUSG00000073490	1	175653814	175671878
Ifi204	ENSMUSG00000073489	1	175677424	175697050
Gm16340	ENSMUSG00000090222	1	175705968	175732851
Mndal	ENSMUSG00000090272	1	175787352	175872622
Mnda	ENSMUSG00000026536	1	175826486	175843053
Ifi203	ENSMUSG00000039997	1	175850538	175872803
Ifi202b	ENSMUSG00000026535	1	175892700	175912975
Ifi205	ENSMUSG00000054203	1	175942129	175961886
Olfr433	ENSMUSG00000045381	1	175972064	175973067
Olfr432	ENSMUSG00000047048	1	175980506	175981444
Olfr430	ENSMUSG00000050134	1	175999431	176000384
Olfr429	ENSMUSG00000049528	1	176019169	176020111
Olfr427	ENSMUSG00000059371	1	176029591	176030538
Olfr231	ENSMUSG00000046486	1	176047222	176048145
Olfr424	ENSMUSG00000051528	1	176066877	176067824
Olfr421	ENSMUSG00000091950	1	176081612	176082661
Olfr420	ENSMUSG00000055033	1	176088853	176089898
Spna1	ENSMUSG00000026532	1	176102907	176178581
Olfr419	ENSMUSG00000050788	1	176180020	176181107
1810030J14Rik	ENSMUSG00000026531	1	176260649	176263004
Olfr417	ENSMUSG00000066672	1	176299050	176299979
Olfr248	ENSMUSG00000059503	1	176321177	176322186
Olfr414	ENSMUSG00000051509	1	176360561	176361515
Olfr220	ENSMUSG00000066671	1	176378756	176379733
Fmn2	ENSMUSG00000028354	1	176431956	176752848
Grem2	ENSMUSG00000050069	1	176763916	176851950
Rgs7	ENSMUSG00000026527	1	176989867	177421261
Fh1	ENSMUSG00000026526	1	177530505	177555766
Kmo	ENSMUSG00000039783	1	177550512	177592247
Opn3	ENSMUSG00000026525	1	177592552	177622907
Chml	ENSMUSG00000078185	1	177616619	177618484
Wdr64	ENSMUSG00000026523	1	177628724	177745865
Exo1	ENSMUSG00000039748	1	177810909	177841527
Pld5	ENSMUSG00000055214	1	177892437	178205443
B020018G12Rik	ENSMUSG00000078184	1	177907908	177909245
U6	ENSMUSG00000065666	1	177834676	177834782
U2	ENSMUSG00000077794	1	177730645	177730820
Cep170	ENSMUSG00000057335	1	178663784	178744198
Sdccag8	ENSMUSG00000026504	1	178744791	178950568
Gm15423	ENSMUSG00000087082	1	178858130	178862842
AC144905.1	ENSMUSG00000093132	1	178809965	178810044
7SK	ENSMUSG00000084749	1	178724087	178724351
Mir350	ENSMUSG00000065573	1	178702456	178702554
U6	ENSMUSG00000087875	1	178630748	178630855
Smyd3	ENSMUSG00000055067	1	180882091	181448172
Gm5561	ENSMUSG00000075392	1	181450388	181451039
Tfb2m	ENSMUSG00000026492	1	181458186	181476398
Cnst	ENSMUSG00000038949	1	181476501	181557609
Sccpdh	ENSMUSG00000038936	1	181598341	181617320
Gm1305	ENSMUSG00000087236	1	181625428	181675316
Ahctf1	ENSMUSG00000026491	1	181675025	181733811
Gm10518	ENSMUSG00000073486	1	181733507	181734807
Cdc42bpa	ENSMUSG00000026490	1	181890603	182095734
Adck3	ENSMUSG00000026489	1	182095369	182129733
Psen2	ENSMUSG00000010609	1	182157135	182193569
Gm5069	ENSMUSG00000055676	1	182257102	182260681
Itpkb	ENSMUSG00000038855	1	182260607	182354933
6330403A02Rik	ENSMUSG00000053963	1	182362518	182413598
Parp1	ENSMUSG00000026496	1	182499086	182531384
Lin9	ENSMUSG00000058729	1	182571498	182620816
Mixl1	ENSMUSG00000026497	1	182623174	182627165
Acbd3	ENSMUSG00000026499	1	182656174	182684334
H3f3a	ENSMUSG00000060743	1	182730963	182744074
BC031781	ENSMUSG00000038806	1	182781282	182798228
Lefty2	ENSMUSG00000066652	1	182823239	182829234
Pycr2	ENSMUSG00000026520	1	182834405	182838218
Lefty1	ENSMUSG00000038793	1	182865153	182868531
Gm17275	ENSMUSG00000090986	1	182732699	182739614
Gm15480	ENSMUSG00000082395	1	181468548	181469066
Gm16067	ENSMUSG00000073485	1	182743907	182746990
U6	ENSMUSG00000084558	1	182762900	182763007
AC167020.1	ENSMUSG00000092967	1	182663926	182664013
Tmem63a	ENSMUSG00000026519	1	182872475	182905243
Ephx1	ENSMUSG00000038776	1	182906286	182951035
9130409I23Rik	ENSMUSG00000038768	1	182981368	182990798
Nvl	ENSMUSG00000026516	1	183023554	183074288
Cnih4	ENSMUSG00000062169	1	183081062	183099125
Wdr26	ENSMUSG00000038733	1	183103359	183142109
A430110L20Rik	ENSMUSG00000054135	1	183156207	183158621
Cnih3	ENSMUSG00000026514	1	183282759	183390772
Ccdc121	ENSMUSG00000050625	1	183439764	183441582
2210411M09Rik	ENSMUSG00000085563	1	182882195	182888280
Rpl35a-ps2	ENSMUSG00000081214	1	183172076	183172498
Gm16547	ENSMUSG00000089888	1	183330595	183330887
Gm16539	ENSMUSG00000089927	1	183361854	183362531
Dnahc14	ENSMUSG00000047369	1	183669119	183699805
Lbr	ENSMUSG00000004880	1	183745447	183772532
U6	ENSMUSG00000064970	1	183743738	183743831
Gm5533	ENSMUSG00000056699	1	183781739	183783320
Enah	ENSMUSG00000022995	1	183834576	183950111
5S_rRNA	ENSMUSG00000089429	1	183770584	183770699
Srp9	ENSMUSG00000026511	1	184054868	184062538
Vmn1r1	ENSMUSG00000091013	1	184087275	184088450
Degs1	ENSMUSG00000038633	1	184205903	184212935
Fbxo28	ENSMUSG00000047539	1	184243233	184271737
Capn8	ENSMUSG00000038599	1	184495138	184562483
4922505E12Rik	ENSMUSG00000043429	1	184677388	184679253
Susd4	ENSMUSG00000038576	1	184693991	184826729
Tlr5	ENSMUSG00000079164	1	184884919	184906175
Gm8214	ENSMUSG00000090533	1	185505657	185506073
Dusp10	ENSMUSG00000039384	1	185837181	185899515
1700056E22Rik	ENSMUSG00000044854	1	185856911	185857453
Rpl21-ps1	ENSMUSG00000059483	1	186441127	186441609
U6	ENSMUSG00000089057	1	186403988	186404085
Hlx	ENSMUSG00000039377	1	186551019	186556498
Mosc1	ENSMUSG00000026621	1	186610655	186635192
Mosc2	ENSMUSG00000073481	1	186636947	186670330
C130074G19Rik	ENSMUSG00000039349	1	186695805	186707097
Mark1	ENSMUSG00000026620	1	186720322	186823428
Rab3gap2	ENSMUSG00000039318	1	187028047	187110622
Iars2	ENSMUSG00000026618	1	187108605	187153275
Bpnt1	ENSMUSG00000026617	1	187156028	187181656
4930488B22Rik	ENSMUSG00000092578	1	186536376	186542868
Snora36b	ENSMUSG00000077571	1	187066786	187066917
Mir194-1	ENSMUSG00000065581	1	187137198	187137264
Mir215	ENSMUSG00000065562	1	187137460	187137571
7SK	ENSMUSG00000088562	1	186681959	186682291
Mir1981	ENSMUSG00000088559	1	186646286	186646367
Eprs	ENSMUSG00000026615	1	187186974	187252234
Slc30a10	ENSMUSG00000026614	1	187278727	187292641
Gm2061	ENSMUSG00000085692	1	187270995	187279447
9630028B13Rik	ENSMUSG00000051295	1	187253236	187265698
4930532G15Rik	ENSMUSG00000091047	1	187183340	187186744
Lyplal1	ENSMUSG00000039246	1	187911610	187941189
5S_rRNA	ENSMUSG00000089363	1	187947080	187947185
Tgfb2	ENSMUSG00000039239	1	188447065	188529871
Rrp15	ENSMUSG00000001305	1	188544857	188573237
SNORA70	ENSMUSG00000089045	1	188500621	188500755
A430105J06Rik	ENSMUSG00000090488	1	188573275	188576800
D1Pas1	ENSMUSG00000039224	1	188791295	188794506
Spata17	ENSMUSG00000026611	1	188868527	189039344
Gpatch2	ENSMUSG00000039210	1	189039387	189175583
Esrrg	ENSMUSG00000026610	1	189432670	190038764
Ush2a	ENSMUSG00000026609	1	190085902	190788920
Gm15508	ENSMUSG00000089831	1	188896890	188897214
Gm15509	ENSMUSG00000089947	1	188944748	188948244
1700007P06Rik	ENSMUSG00000089730	1	188949017	188949862
AC121892.1	ENSMUSG00000077884	1	190343232	190343322
SNORA17	ENSMUSG00000077235	1	190446802	190446932
U6	ENSMUSG00000084550	1	190584355	190584458
Kctd3	ENSMUSG00000026608	1	190794977	190831719
Kcnk2	ENSMUSG00000037624	1	191031816	191167711
Cenpf	ENSMUSG00000026605	1	191464478	191511965
Ptpn14	ENSMUSG00000026604	1	191552147	191700574
mmu-mir-1194	ENSMUSG00000080505	1	191217229	191217349
Gm17653	ENSMUSG00000090445	1	191657020	191660499
Smyd2	ENSMUSG00000026603	1	191704371	191746242
Sephs1	ENSMUSG00000026662	2	4802610	4831603
Phyh	ENSMUSG00000026664	2	4840065	4859776
Ucma	ENSMUSG00000026668	2	4897168	4906794
Mcm10	ENSMUSG00000026669	2	4910760	4933837
Optn	ENSMUSG00000026672	2	4941688	4985097
Ccdc3	ENSMUSG00000026676	2	5058822	5151924
Camk1d	ENSMUSG00000039145	2	5214503	5635561
Cdc123	ENSMUSG00000039128	2	5715340	5766210
Nudt5	ENSMUSG00000025817	2	5766065	5792941
Gm13199	ENSMUSG00000056718	2	5783126	5783980
Sec61a2	ENSMUSG00000025816	2	5792033	5816478
Dhtkd1	ENSMUSG00000025815	2	5817161	5863838
Upf2	ENSMUSG00000043241	2	5872515	5977749
5430407P10Rik	ENSMUSG00000045319	2	6021071	6051257
Echdc3	ENSMUSG00000039063	2	6109511	6134079
Usp6nl	ENSMUSG00000039046	2	6243713	6367436
Celf2	ENSMUSG00000002107	2	6460751	7002348
Gm13194	ENSMUSG00000086670	2	4863220	4863530
Gm13193	ENSMUSG00000082795	2	4877115	4877339
Gm13192	ENSMUSG00000069188	2	4880509	4880822
4930551O13Rik	ENSMUSG00000086430	2	4958326	4962179
Gm13198	ENSMUSG00000081005	2	5077438	5078263
Gm13197	ENSMUSG00000080820	2	5204696	5204920
Gm13216	ENSMUSG00000082013	2	5524617	5525207
Gm13267	ENSMUSG00000085818	2	5816556	5821177
Gm13384	ENSMUSG00000082332	2	6053254	6055002
A230108P19Rik	ENSMUSG00000087125	2	6114297	6242657
Gm13383	ENSMUSG00000087485	2	6176992	6178312
Gm13388	ENSMUSG00000085716	2	6352832	6357079
Gm13391	ENSMUSG00000086109	2	6393046	6399665
Gm13389	ENSMUSG00000087079	2	6805316	6807970
Gm16934	ENSMUSG00000087583	2	5058795	5151910
AL807778.1	ENSMUSG00000092757	2	4815438	4815516
U2	ENSMUSG00000084606	2	5180975	5181161
Gm10855	ENSMUSG00000075538	2	6853587	6856127
Gm10115	ENSMUSG00000062319	2	6871499	6872726
Gm17437	ENSMUSG00000091136	2	6998311	7002359
7SK	ENSMUSG00000065824	2	6997140	6997460
Ppp1r1c	ENSMUSG00000034683	2	79547937	79658653
Neurod1	ENSMUSG00000034701	2	79292678	79296908
Cerkl	ENSMUSG00000075256	2	79170700	79296942
Gm17325	ENSMUSG00000090313	2	79294142	79301264
Frzb	ENSMUSG00000027004	2	80252127	80287782
Ssfa2	ENSMUSG00000027007	2	79475509	79513123
Ube2e3	ENSMUSG00000027011	2	78708281	78761450
Itga4	ENSMUSG00000027009	2	79095583	79173280
Pde1a	ENSMUSG00000059173	2	79674610	79969632
Nckap1	ENSMUSG00000027002	2	80340669	80421537
Gm14464	ENSMUSG00000082046	2	78437826	78439079
Gm14463	ENSMUSG00000084239	2	78497586	78498083
Gm14467	ENSMUSG00000082731	2	78560594	78560866
Gm17014	ENSMUSG00000084101	2	78685443	78685610
Gm14466	ENSMUSG00000083950	2	78862978	78863428
Gm14469	ENSMUSG00000080984	2	78878690	78878891
Gm14465	ENSMUSG00000083691	2	79001186	79001752
Gm13673	ENSMUSG00000081284	2	79200022	79200552
Gm13674	ENSMUSG00000083519	2	79972087	79972909
Gm13752	ENSMUSG00000085921	2	80235054	80240682
Gm13687	ENSMUSG00000082494	2	80339387	80339668
Gm13689	ENSMUSG00000081487	2	80389869	80390553
Prdx6b	ENSMUSG00000050114	2	80132629	80135513
Dnajc10	ENSMUSG00000027006	2	80155623	80194200
U6	ENSMUSG00000088915	2	79188522	79188624
U6	ENSMUSG00000064669	2	80398842	80398944
Gm13688	ENSMUSG00000083284	2	80442890	80443497
Dusp19	ENSMUSG00000027001	2	80457202	80472518
Nup35	ENSMUSG00000026999	2	80457393	80499063
Gm13690	ENSMUSG00000086436	2	80469438	80469725
Gm13756	ENSMUSG00000081566	2	80748898	80749512
Gm13701	ENSMUSG00000084005	2	80817995	80818295
Gm13699	ENSMUSG00000064193	2	80677284	80678919
Gm13700	ENSMUSG00000084107	2	80701312	80702439
Gm13755	ENSMUSG00000084297	2	80730263	80734598
U6	ENSMUSG00000065261	2	80824240	80824346
SNORA17	ENSMUSG00000077404	2	80547746	80547872
SNORA46	ENSMUSG00000065141	2	80690445	80690575
Rag1	ENSMUSG00000061311	2	101478439	101489658
B230118H07Rik	ENSMUSG00000027165	2	101400938	101489689
Pdhx	ENSMUSG00000010914	2	102861232	102913670
Apip	ENSMUSG00000010911	2	102913832	102932801
Ehf	ENSMUSG00000012350	2	103103590	103143435
Elf5	ENSMUSG00000027186	2	103251845	103291146
Cat	ENSMUSG00000027187	2	103294006	103325317
Abtb2	ENSMUSG00000032724	2	103406467	103558580
Traf6	ENSMUSG00000027164	2	101518586	101541826
Prr5l	ENSMUSG00000032841	2	101554442	101723184
Commd9	ENSMUSG00000027163	2	101726404	101741803
Ldlrad3	ENSMUSG00000048058	2	101790360	102026542
Trim44	ENSMUSG00000027189	2	102140276	102247985
Fjx1	ENSMUSG00000075012	2	102289525	102291949
Pamr1	ENSMUSG00000027188	2	102390169	102483198
Slc1a2	ENSMUSG00000005089	2	102498816	102630941
Cd44	ENSMUSG00000005087	2	102651298	102741822
Gm13905	ENSMUSG00000087465	2	101712332	101723413
Gm13919	ENSMUSG00000085417	2	101879786	101906882
Gm13920	ENSMUSG00000085110	2	101897744	101901587
Gm13921	ENSMUSG00000082328	2	102014447	102014909
Gm13866	ENSMUSG00000081774	2	102049569	102050536
Gm13868	ENSMUSG00000083306	2	102152071	102152364
Gm13872	ENSMUSG00000087185	2	102578064	102586917
Gm10038	ENSMUSG00000058281	2	102939312	102939758
Gm13874	ENSMUSG00000087032	2	103017944	103026838
Gm13869	ENSMUSG00000086957	2	103046366	103050514
Gm13873	ENSMUSG00000084385	2	103072695	103073121
A930006I01Rik	ENSMUSG00000087278	2	103178758	103212921
BC016548	ENSMUSG00000070794	2	103217800	103229201
Gm13996	ENSMUSG00000081687	2	103387416	103387845
U6	ENSMUSG00000065683	2	102738117	102738223
Nat10	ENSMUSG00000027185	2	103561413	103601427
Caprin1	ENSMUSG00000027184	2	103603098	103637806
4930547E08Rik	ENSMUSG00000086687	2	103644609	103650779
Gm13878	ENSMUSG00000081348	2	103651043	103651774
Gm13880	ENSMUSG00000081010	2	103659157	103659633
Gm13877	ENSMUSG00000083495	2	103677258	103677674
Gm13875	ENSMUSG00000081275	2	103679111	103679392
AL928544.2	ENSMUSG00000076234	2	103679266	103679361
Gm13879	ENSMUSG00000082845	2	103683572	103683813
AL928544.1	ENSMUSG00000076233	2	103683575	103683670
Gm13876	ENSMUSG00000083643	2	103728481	103728741
Gm13881	ENSMUSG00000084756	2	103752181	103759117
Lmo2	ENSMUSG00000032698	2	103798143	103822035
4931422A03Rik	ENSMUSG00000046085	2	103807100	103868518
Fbxo3	ENSMUSG00000027180	2	103867878	103903397
SCARNA21	ENSMUSG00000087739	2	103880826	103880964
Gm10912	ENSMUSG00000078091	2	103905983	103907643
Gm10799	ENSMUSG00000075006	2	103908204	103908707
Cd59b	ENSMUSG00000068686	2	103910006	103931344
Cd59a	ENSMUSG00000032679	2	103935958	103955511
A930018P22Rik	ENSMUSG00000032671	2	103962926	103964906
D430041D05Rik	ENSMUSG00000068373	2	103983230	104250491
Id1	ENSMUSG00000042745	2	152561987	152563146
Cox4i2	ENSMUSG00000009876	2	152579909	152590773
Bcl2l1	ENSMUSG00000007659	2	152593052	152657464
Tpx2	ENSMUSG00000027469	2	152673700	152721057
Mylk2	ENSMUSG00000027470	2	152737088	152748804
Foxs1	ENSMUSG00000074676	2	152757634	152758944
Dusp15	ENSMUSG00000042662	2	152766731	152777434
Ttll9	ENSMUSG00000074673	2	152788221	152834218
Pdrg1	ENSMUSG00000027472	2	152834626	152841163
Xkr7	ENSMUSG00000042631	2	152857588	152881511
BC020535	ENSMUSG00000027474	2	152891691	152907471
Hck	ENSMUSG00000003283	2	152934204	152977177
Tm9sf4	ENSMUSG00000068040	2	152987039	153036202
Tspyl3	ENSMUSG00000074671	2	153048116	153051177
Plagl2	ENSMUSG00000051413	2	153053495	153067162
Pofut1	ENSMUSG00000046020	2	153067269	153095983
Kif3b	ENSMUSG00000027475	2	153117149	153159126
Asxl1	ENSMUSG00000042548	2	153171581	153229743
8430427H17Rik	ENSMUSG00000061411	2	153233198	153355707
4930404H24Rik	ENSMUSG00000079001	2	153318526	153319577
Commd7	ENSMUSG00000056941	2	153442669	153458517
Dnmt3b	ENSMUSG00000027478	2	153475186	153513466
Mapre1	ENSMUSG00000027479	2	153567010	153599046
Efcab8	ENSMUSG00000044083	2	153606615	153670488
Sun5	ENSMUSG00000027480	2	153681924	153696820
Bpifb2	ENSMUSG00000027481	2	153700781	153721006
Bpifb6	ENSMUSG00000068009	2	153726124	153738531
Bpifb3	ENSMUSG00000068008	2	153743966	153758732
Bpifb4	ENSMUSG00000074665	2	153763948	153789837
Bpifa6	ENSMUSG00000078998	2	153800681	153826231
Bpifa2	ENSMUSG00000042459	2	153834001	153841815
Bpifa3	ENSMUSG00000027482	2	153956072	153964092
Bpifa1	ENSMUSG00000027483	2	153968616	153974955
Bpifa5	ENSMUSG00000027484	2	153988343	153994186
Bpifb1	ENSMUSG00000027485	2	154016554	154046105
Bpifb5	ENSMUSG00000038572	2	154049478	154066638
Bpifb9a	ENSMUSG00000067998	2	154083590	154096981
Bpifb9b	ENSMUSG00000067996	2	154132963	154146382
Cdk5rap1	ENSMUSG00000027487	2	154161116	154198746
Snta1	ENSMUSG00000027488	2	154202049	154233835
Cbfa2t2	ENSMUSG00000038533	2	154262217	154365092
Necab3	ENSMUSG00000027489	2	154370135	154384626
1700003F12Rik	ENSMUSG00000038523	2	154372821	154375739
1700007I08Rik	ENSMUSG00000078129	2	154377512	154379012
E2f1	ENSMUSG00000027490	2	154385143	154395628
Pxmp4	ENSMUSG00000000876	2	154411494	154429444
Zfp341	ENSMUSG00000059842	2	154439033	154472557
Chmp4b	ENSMUSG00000038467	2	154477441	154520521
2500004C02Rik	ENSMUSG00000073236	2	153166893	153171809
Gm14472	ENSMUSG00000082283	2	153239585	153239866
Gm14162	ENSMUSG00000082318	2	152571419	152572043
Gm14199	ENSMUSG00000089898	2	152815753	152817367
7530422B04Rik	ENSMUSG00000079000	2	153474426	153476022
Gm14490	ENSMUSG00000082079	2	153522388	153555641
Gm14494	ENSMUSG00000083097	2	153651789	153652570
Gm14497	ENSMUSG00000081013	2	153912571	153913150
Gm14197	ENSMUSG00000083732	2	154109949	154110997
Gm14198	ENSMUSG00000085483	2	154455738	154458372
Gm14217	ENSMUSG00000082064	2	154529545	154530435
Gm14215	ENSMUSG00000083975	2	154539238	154539458
Gm14216	ENSMUSG00000085691	2	154548088	154564187
AL731857.1	ENSMUSG00000093306	2	152598524	152598625
AL833801.1	ENSMUSG00000093746	2	152690803	152690862
U6	ENSMUSG00000089499	2	152980749	152980851
4930591A17Rik	ENSMUSG00000039138	2	179149641	179151587
Cdh4	ENSMUSG00000000305	2	179177136	179634078
Gm10711	ENSMUSG00000074518	2	179628614	179629398
Taf4a	ENSMUSG00000039117	2	179646851	179711351
Lsm14b	ENSMUSG00000039108	2	179759692	179770170
Psma7	ENSMUSG00000027566	2	179771078	179777138
Ss18l1	ENSMUSG00000039086	2	179777214	179804906
Gtpbp5	ENSMUSG00000039069	2	179805293	179820607
Hrh3	ENSMUSG00000039059	2	179834170	179839193
Osbpl2	ENSMUSG00000039050	2	179854011	179897385
Adrm1	ENSMUSG00000039041	2	179906190	179910991
Lama5	ENSMUSG00000015647	2	179911078	179960564
Rps21	ENSMUSG00000039001	2	179992082	179993150
Cables2	ENSMUSG00000038990	2	179993245	180008201
BC066135	ENSMUSG00000038980	2	180012351	180024584
Gata5	ENSMUSG00000015627	2	180059838	180069404
Gm14318	ENSMUSG00000056061	2	180067562	180075437
Slco4a1	ENSMUSG00000038963	2	180190950	180209572
Ntsr1	ENSMUSG00000027568	2	180234681	180279685
1600027N09Rik	ENSMUSG00000027569	2	180316009	180321009
Ogfr	ENSMUSG00000049401	2	180323950	180330541
Col9a3	ENSMUSG00000027570	2	180332495	180356894
Tcfl5	ENSMUSG00000038932	2	180356661	180377413
Dido1	ENSMUSG00000038914	2	180392669	180444704
2310003C23Rik	ENSMUSG00000027573	2	180444822	180453438
Slc17a9	ENSMUSG00000023393	2	180459968	180476985
Bhlhe23	ENSMUSG00000045493	2	180509086	180511605
Gm14314	ENSMUSG00000082215	2	178754824	178755838
Gm14292	ENSMUSG00000061897	2	178912130	178912585
Gm14293	ENSMUSG00000081481	2	178975195	178975771
Gm14294	ENSMUSG00000081882	2	179098998	179099748
Gm14300	ENSMUSG00000083410	2	179347327	179348272
4921531C22Rik	ENSMUSG00000085704	2	179710698	179713718
Gm14299	ENSMUSG00000082850	2	179727893	179728289
Gm17180	ENSMUSG00000090589	2	179834618	179836207
B230312C02Rik	ENSMUSG00000084843	2	180105196	180120590
Gm14343	ENSMUSG00000087550	2	180500919	180510108
Gm14340	ENSMUSG00000074507	2	180553048	180559335
Gm14342	ENSMUSG00000086166	2	180564195	180624365
Gm14344	ENSMUSG00000085428	2	180571186	180583619
Gm14339	ENSMUSG00000085728	2	180582357	180583751
Mir3091	ENSMUSG00000092827	2	179992241	179992316
Mir124a-3	ENSMUSG00000065454	2	180628736	180628822
HAR1F	ENSMUSG00000088334	2	180572532	180572663
AL663067.1	ENSMUSG00000080507	2	179725502	179725587
U6	ENSMUSG00000064422	2	180432768	180432874
Mir133a-2	ENSMUSG00000065460	2	180133084	180133187
Mir1a-1	ENSMUSG00000070144	2	180123753	180123829
Ythdf1	ENSMUSG00000038848	2	180639082	180655654
Birc7	ENSMUSG00000038840	2	180663728	180668715
Nkain4	ENSMUSG00000027574	2	180669477	180689404
Arfgap1	ENSMUSG00000027575	2	180701930	180717231
Gm14341	ENSMUSG00000087293	2	180689169	180701517
9230112E08Rik	ENSMUSG00000070461	2	180718937	180720296
Col20a1	ENSMUSG00000016356	2	180721240	180752245
Chrna4	ENSMUSG00000027577	2	180753085	180778251
Kcnq2	ENSMUSG00000016346	2	180810284	180869996
Eef1a2	ENSMUSG00000016349	2	180882358	180891719
Ppdpf	ENSMUSG00000016344	2	180921952	180923476
Ptk6	ENSMUSG00000038751	2	180928426	180937494
U6	ENSMUSG00000084696	2	180918217	180918320
Gm12565	ENSMUSG00000081093	3	37498346	37498994
4930594O21Rik	ENSMUSG00000085677	3	37512835	37514198
Gm15450	ENSMUSG00000063001	3	37613662	37614100
Gm7799	ENSMUSG00000087457	3	37858534	37859009
C230034O21Rik	ENSMUSG00000086181	3	38773492	38787181
Gm9845	ENSMUSG00000050533	3	39257180	39257827
Spry1	ENSMUSG00000037211	3	37538869	37543520
Rpl21-ps10	ENSMUSG00000064315	3	38006330	38006877
Ankrd50	ENSMUSG00000044864	3	38348183	38383766
Fat4	ENSMUSG00000046743	3	38785862	38910907
Gm5148	ENSMUSG00000058174	3	37613112	37623412
Spata5	ENSMUSG00000027722	3	37318818	37478018
AC162799.1	ENSMUSG00000092986	3	38166760	38167006
SNORA17	ENSMUSG00000077728	3	37894027	37894157
SNORA17	ENSMUSG00000089123	3	37701466	37701574
AC114901.1	ENSMUSG00000076385	3	38457031	38457136
Vmn2r1	ENSMUSG00000027824	3	63885564	63909380
Vmn2r2	ENSMUSG00000043897	3	63920354	63944465
Vmn2r3	ENSMUSG00000091572	3	64062883	64091417
Vmn2r4	ENSMUSG00000092049	3	64192543	64219218
Vmn2r5	ENSMUSG00000068999	3	64294743	64313657
Vmn2r6	ENSMUSG00000090581	3	64341483	64369220
Vmn2r7	ENSMUSG00000062200	3	64494582	64648687
Kcnab1	ENSMUSG00000027827	3	64913306	65182145
Ssr3	ENSMUSG00000027828	3	65183577	65196545
Gm16162	ENSMUSG00000090131	3	63629716	63630366
Gm16129	ENSMUSG00000085290	3	63647038	63647991
Gm9479	ENSMUSG00000090303	3	63856953	63859532
Gm5139	ENSMUSG00000093447	3	63967312	63967560
Gm18294	ENSMUSG00000093416	3	63999496	64017599
Vmn2r-ps4	ENSMUSG00000093503	3	64132582	64136775
Vmn2r-ps5	ENSMUSG00000091967	3	64143487	64161646
Vmn2r-ps6	ENSMUSG00000093395	3	64240805	64242209
Vmn2r-ps7	ENSMUSG00000093546	3	64246522	64247897
RP23-445D13.2	ENSMUSG00000093671	3	64251889	64264017
Vmn2r-ps8	ENSMUSG00000093375	3	64280940	64283241
Vmn2r-ps9	ENSMUSG00000093699	3	64395437	64396818
RP23-445D13.4	ENSMUSG00000093484	3	64400835	64409695
Vmn2r-ps10	ENSMUSG00000093646	3	64425616	64427917
Vmn2r-ps10	ENSMUSG00000090261	3	64427143	64427917
Vmn2r-ps11	ENSMUSG00000093434	3	64436496	64648665
AC110575.2	ENSMUSG00000093524	3	64436785	64648665
Vmn2r-ps12	ENSMUSG00000093474	3	64548671	64549567
Vmn2r-ps12	ENSMUSG00000090010	3	64548671	64549539
RP24-549B23.7	ENSMUSG00000093414	3	64574208	64574440
Vmn2r-ps13	ENSMUSG00000093767	3	64703079	64703684
A730090N16Rik	ENSMUSG00000090120	3	65128698	65153351
Gm5540	ENSMUSG00000048916	3	65197259	65199106
Gm17548	ENSMUSG00000091540	3	63767555	63772581
Plch1	ENSMUSG00000036834	3	63500156	63703394
E130311K13Rik	ENSMUSG00000048581	3	63718606	63733394
Gmps	ENSMUSG00000027823	3	63780028	63826501
Slc33a1	ENSMUSG00000027822	3	63737429	63768690
U6	ENSMUSG00000088360	3	63574134	63574231
U6	ENSMUSG00000088957	3	63292915	63293020
snoU13	ENSMUSG00000089457	3	63711633	63711734
snoU109	ENSMUSG00000088735	3	64122329	64122486
U6	ENSMUSG00000089039	3	63913557	63913659
SNORA17	ENSMUSG00000088824	3	64698393	64698518
4931440P22Rik	ENSMUSG00000074580	3	65311179	65333301
Tiparp	ENSMUSG00000034640	3	65332332	65359067
Lekr1	ENSMUSG00000074579	3	65470150	65635084
Ccnl1	ENSMUSG00000027829	3	65750073	65762171
Veph1	ENSMUSG00000027831	3	65857483	66100759
U6	ENSMUSG00000065330	3	65575433	65575539
U1	ENSMUSG00000064522	3	65892031	65892183
U6	ENSMUSG00000087825	3	65329623	65329715
Ptx3	ENSMUSG00000027832	3	66023809	66029728
Shox2	ENSMUSG00000093425	3	66775217	66785693
Shox2	ENSMUSG00000027833	3	66775649	66785693
Rsrc1	ENSMUSG00000034544	3	66785312	67162318
U6	ENSMUSG00000065245	3	66859880	66859986
Gm17402	ENSMUSG00000090408	3	67169383	67179085
Mlf1	ENSMUSG00000048416	3	67178019	67203925
Gfm1	ENSMUSG00000027774	3	67234018	67280451
Lxn	ENSMUSG00000047557	3	67261920	67267848
Rarres1	ENSMUSG00000049404	3	67282894	67319445
Fam198b	ENSMUSG00000027955	3	79688455	79750202
Gria2	ENSMUSG00000033981	3	80488858	80606713
Glrb	ENSMUSG00000028020	3	80647521	80717582
Gm17731	ENSMUSG00000091291	3	80719733	80721354
Pdgfc	ENSMUSG00000028019	3	80840338	81017962
Gm6706	ENSMUSG00000087123	3	80203271	80203588
Gm16000	ENSMUSG00000085106	3	80841330	80844359
SNORA17	ENSMUSG00000089444	3	81684649	81684788
AC163349.1	ENSMUSG00000093226	3	80496125	80496235
Gm9989	ENSMUSG00000056023	3	81725190	81728385
Ctso	ENSMUSG00000028015	3	81736523	81760647
Tdo2	ENSMUSG00000028011	3	81761012	81780124
Accn5	ENSMUSG00000028008	3	81786212	81825155
Rwdd3	ENSMUSG00000028133	3	120858318	120874613
Tmem56	ENSMUSG00000028132	3	120904679	120986016
Alg14	ENSMUSG00000039887	3	120994735	121064929
Cnn3	ENSMUSG00000053931	3	121129459	121161123
Slc44a3	ENSMUSG00000039865	3	121162447	121235262
A730020M07Rik	ENSMUSG00000044522	3	121340063	121346403
4930432M17Rik	ENSMUSG00000074248	3	121374235	121385753
F3	ENSMUSG00000028128	3	121426455	121437970
Abcd3	ENSMUSG00000028127	3	121461827	121518220
Gm17676	ENSMUSG00000091716	3	121499382	121499550
Arhgap29	ENSMUSG00000039831	3	121656147	121719595
Abca4	ENSMUSG00000028125	3	121747361	121882979
Gm4609	ENSMUSG00000078592	3	121933113	121934114
Gclm	ENSMUSG00000028124	3	121948475	121972902
Dnttip2	ENSMUSG00000039756	3	121977332	121988187
Bcar3	ENSMUSG00000028121	3	122122698	122233098
Fnbp1l	ENSMUSG00000039735	3	122241637	122322585
Gm16078	ENSMUSG00000084912	3	121757668	121758466
RP23-71G16.1	ENSMUSG00000093392	3	121959646	121960137
Gm17494	ENSMUSG00000057359	3	121960009	121996465
A530020G20Rik	ENSMUSG00000086471	3	121234529	121238356
AC110195.1	ENSMUSG00000093177	3	120933178	120933248
Mir760	ENSMUSG00000076456	3	121996503	121996621
U1	ENSMUSG00000087743	3	122167645	122167800
AC134918.1	ENSMUSG00000092934	3	121935453	121935554
7SK	ENSMUSG00000084674	3	121040610	121040877
Arsj	ENSMUSG00000046561	3	126066745	126143292
Camk2d	ENSMUSG00000053819	3	126299220	126547972
Ank2	ENSMUSG00000032826	3	126624525	127111949
Gm4392	ENSMUSG00000078164	3	127201581	127201919
Larp7	ENSMUSG00000027968	3	127239872	127256266
4930422G04Rik	ENSMUSG00000051278	3	127256407	127320939
Neurog2	ENSMUSG00000027967	3	127336054	127338549
Alpk1	ENSMUSG00000028028	3	127373317	127483445
Tifa	ENSMUSG00000046688	3	127492790	127535053
Ap1ar	ENSMUSG00000074238	3	127510182	127540410
5730508B09Rik	ENSMUSG00000050549	3	127572606	127599241
Gm10650	ENSMUSG00000074237	3	127741612	127743579
Gm17225	ENSMUSG00000090427	3	126135801	126142187
Gm15551	ENSMUSG00000086679	3	126370247	126371950
Gm16238	ENSMUSG00000089988	3	127394853	127395440
Gm16958	ENSMUSG00000087227	3	126864223	126871206
SNORA17	ENSMUSG00000077617	3	126708287	126708418
Mir302d	ENSMUSG00000065447	3	127248542	127248607
Mir302a	ENSMUSG00000065552	3	127248414	127248482
Mir367	ENSMUSG00000065413	3	127248651	127248725
Mir302c	ENSMUSG00000065482	3	127248281	127248348
5S_rRNA	ENSMUSG00000088537	3	127434512	127434608
Mir302b	ENSMUSG00000076252	3	127248146	127248219
Gm9387	ENSMUSG00000074236	3	128656700	128658016
SNORA32	ENSMUSG00000065248	3	128243290	128243398
Pitx2	ENSMUSG00000028023	3	128902796	128922509
Enpep	ENSMUSG00000028024	3	128972093	129035638
Elovl6	ENSMUSG00000041220	3	129235304	129341413
Eltd1	ENSMUSG00000039167	3	151100851	151208050
Ifi44	ENSMUSG00000028037	3	151393886	151412911
H28	ENSMUSG00000039146	3	151422605	151425870
Ptgfr	ENSMUSG00000028036	3	151461882	151500594
Gipc2	ENSMUSG00000039131	3	151756497	151829194
Dnajb4	ENSMUSG00000028035	3	151841475	151873243
Fubp1	ENSMUSG00000028034	3	151873422	151899794
Nexn	ENSMUSG00000039103	3	151899950	151929284
Fam73a	ENSMUSG00000054942	3	151936423	152003371
Usp33	ENSMUSG00000025437	3	152009442	152056576
Zzz3	ENSMUSG00000039068	3	152058437	152125790
Ak5	ENSMUSG00000039058	3	152125779	152331104
Gm16198	ENSMUSG00000084343	3	151816411	151817080
Mir3963	ENSMUSG00000092830	3	150686756	150686826
U6	ENSMUSG00000065138	3	151271307	151271413
U7	ENSMUSG00000087997	3	151589312	151589373
Pigk	ENSMUSG00000039047	3	152377064	152643372
St6galnac5	ENSMUSG00000039037	3	152480045	152645210
Rpl29-ps1	ENSMUSG00000090095	3	152443738	152445025
Gm16232	ENSMUSG00000090040	3	152539015	152539181
Gm16213	ENSMUSG00000090017	3	152583204	152584363
AI115009	ENSMUSG00000085901	3	152329877	152344396
Gm16231	ENSMUSG00000090163	3	152606277	152606908
St6galnac3	ENSMUSG00000052544	3	152868369	153388026
7SK	ENSMUSG00000089376	3	153284666	153284933
5730460C07Rik	ENSMUSG00000062046	3	153452269	153455051
Asb17	ENSMUSG00000038997	3	153507173	153518046
Msh4	ENSMUSG00000005493	3	153520111	153569102
Rabggtb	ENSMUSG00000038975	3	153570253	153575930
Acadm	ENSMUSG00000062908	3	153585321	153607596
Gm10042	ENSMUSG00000058508	3	153448017	153448098
2510003D18Rik	ENSMUSG00000086438	3	153513337	153515388
SNORA17	ENSMUSG00000088764	3	153527771	153527895
Snord45c	ENSMUSG00000065463	3	153575089	153575168
Snord45b	ENSMUSG00000064731	3	153573527	153573597
AC087184.1	ENSMUSG00000093463	3	153557665	153557735
SNORA17	ENSMUSG00000089237	3	153371875	153371990
SNORD45	ENSMUSG00000065738	3	153574574	153574654
SNORA17	ENSMUSG00000077174	3	153494134	153494256
Slc44a5	ENSMUSG00000028360	3	153636400	153934686
Lhx8	ENSMUSG00000093486	3	153969252	153993615
Lhx8	ENSMUSG00000028201	3	153969260	153993615
Tyw3	ENSMUSG00000047583	3	154239484	154260068
Cryz	ENSMUSG00000028199	3	154259675	154286146
4922501L14Rik	ENSMUSG00000042943	3	154327060	154420491
BC007180	ENSMUSG00000078161	3	154425121	154430751
Tnni3k	ENSMUSG00000040086	3	154449266	154718371
Fpgt	ENSMUSG00000053870	3	154747885	154756342
Lrriq3	ENSMUSG00000028182	3	154756398	154857242
Gm3076	ENSMUSG00000090114	3	153795304	153795754
AI606473	ENSMUSG00000093738	3	153993785	153997218
Gm20389	ENSMUSG00000092522	3	154371622	154374307
Y_RNA	ENSMUSG00000064765	3	154754982	154755092
U6	ENSMUSG00000065807	3	155451329	155451432
Gm11925	ENSMUSG00000080771	4	30120797	30121331
Gm11924	ENSMUSG00000087180	4	30359262	30450933
4930556G01Rik	ENSMUSG00000085522	4	30591746	30723813
Gm11920	ENSMUSG00000082949	4	30629123	30629685
Gm11921	ENSMUSG00000084402	4	30694720	30695039
Gm11922	ENSMUSG00000082254	4	31307622	31308096
BX255946.1	ENSMUSG00000076428	4	30629099	30629207
U6	ENSMUSG00000065053	4	31102059	31102162
Pax5	ENSMUSG00000014030	4	44544017	44724318
Zcchc7	ENSMUSG00000035649	4	44768749	44945087
Grhpr	ENSMUSG00000035637	4	44994267	45003606
Zbtb5	ENSMUSG00000049657	4	45004114	45025284
1700055D18Rik	ENSMUSG00000070997	4	45025702	45027271
Polr1e	ENSMUSG00000028318	4	45031455	45049437
Fbxo10	ENSMUSG00000048232	4	45047119	45097476
Tomm5	ENSMUSG00000078713	4	45118080	45120986
Gm10982	ENSMUSG00000078712	4	45122633	45126807
Frmpd1	ENSMUSG00000035615	4	45197747	45298808
Rg9mtd3	ENSMUSG00000035601	4	45309999	45329003
Exosc3	ENSMUSG00000028322	4	45329485	45355604
Dcaf10	ENSMUSG00000035572	4	45354973	45392631
Mcart1	ENSMUSG00000045973	4	45408795	45421633
Mcart1	ENSMUSG00000090906	4	45421051	45421623
Shb	ENSMUSG00000044813	4	45436150	45545342
Aldh1b1	ENSMUSG00000035561	4	45811894	45817476
Igfbpl1	ENSMUSG00000035551	4	45822340	45839795
1300002K09Rik	ENSMUSG00000028327	4	45861536	45899880
E230008N13Rik	ENSMUSG00000035539	4	45903175	45963639
Tdrd7	ENSMUSG00000035517	4	45978206	46047633
Tmod1	ENSMUSG00000028328	4	46051807	46128904
Tstd2	ENSMUSG00000035495	4	46127618	46151566
Ncbp1	ENSMUSG00000028330	4	46151485	46185275
Xpa	ENSMUSG00000028329	4	46168219	46209183
Foxe1	ENSMUSG00000070990	4	46356481	46359284
5830415F09Rik	ENSMUSG00000028331	4	46389377	46402309
Hemgn	ENSMUSG00000028332	4	46406861	46426378
Gm12447	ENSMUSG00000080816	4	46340168	46340637
Gm12462	ENSMUSG00000086211	4	44677287	44698219
Gm12463	ENSMUSG00000080916	4	44765149	44765997
Gm12678	ENSMUSG00000084854	4	44956625	44961202
Gm12493	ENSMUSG00000086000	4	44980641	44983968
Gm12679	ENSMUSG00000086205	4	44983448	44991191
Gm12566	ENSMUSG00000082628	4	45149122	45149480
2900093L17Rik	ENSMUSG00000086284	4	45247595	45256862
Gm12585	ENSMUSG00000083541	4	45351617	45351906
Gm12411	ENSMUSG00000081559	4	45562889	45563371
Gm12408	ENSMUSG00000085980	4	45652808	45655176
Gm829	ENSMUSG00000073860	4	45696461	45736210
Gm12410	ENSMUSG00000085305	4	45728041	45729293
Gm12409	ENSMUSG00000085876	4	45775249	45777095
Gm12412	ENSMUSG00000083685	4	45789754	45790081
Gm12444	ENSMUSG00000082194	4	46255886	46256771
Gm12445	ENSMUSG00000081483	4	46286691	46287712
Gm12446	ENSMUSG00000087383	4	46312879	46358387
SNORA17	ENSMUSG00000077587	4	44425341	44425467
U6	ENSMUSG00000065322	4	45561615	45561721
AL806523.1	ENSMUSG00000092924	4	46208251	46208358
7SK	ENSMUSG00000088069	4	46131052	46131318
Mir5120	ENSMUSG00000092761	4	44620363	44620440
AL772376.2	ENSMUSG00000093185	4	45409866	45409990
AL772376.1	ENSMUSG00000088892	4	45513357	45513424
AL805896.1	ENSMUSG00000093332	4	44878179	44878303
Anp32b	ENSMUSG00000028333	4	46463774	46485529
Nans	ENSMUSG00000028334	4	46502120	46516504
Trim14	ENSMUSG00000039853	4	46506653	46549013
Coro2a	ENSMUSG00000028337	4	46549809	46615074
Tbc1d2	ENSMUSG00000039813	4	46617262	46663081
Gabbr2	ENSMUSG00000039809	4	46675190	47004745
Gm12443	ENSMUSG00000082242	4	46432852	46433174
Gm16731	ENSMUSG00000085990	4	46548773	46552674
SNORA36	ENSMUSG00000064410	4	46508027	46508157
Anks6	ENSMUSG00000066191	4	47028541	47070178
Galnt12	ENSMUSG00000039774	4	47104781	47135942
Col15a1	ENSMUSG00000028339	4	47221033	47326039
Tgfbr1	ENSMUSG00000007613	4	47366094	47427803
Alg2	ENSMUSG00000039740	4	47477939	47487205
Sec61b	ENSMUSG00000053317	4	47487530	47496114
Gm568	ENSMUSG00000048824	4	47021188	47023653
Gm12425	ENSMUSG00000081561	4	47054470	47054832
Gm12422	ENSMUSG00000084199	4	47084518	47084819
Gm12424	ENSMUSG00000081785	4	47113904	47114350
Gm12423	ENSMUSG00000083491	4	47184541	47184675
Gm12426	ENSMUSG00000087500	4	47210359	47221331
Gm12430	ENSMUSG00000081152	4	47466504	47467825
SNORA17	ENSMUSG00000089349	4	47933627	47933769
Nr4a3	ENSMUSG00000028341	4	48058025	48099319
Stx17	ENSMUSG00000061455	4	48137787	48199379
Gm12434	ENSMUSG00000085660	4	48009328	48011133
Erp44	ENSMUSG00000028343	4	48206195	48292430
Mir1958	ENSMUSG00000087844	4	48225991	48226087
Tmeff1	ENSMUSG00000028347	4	48598046	48676003
Murc	ENSMUSG00000028348	4	48676386	48686374
E130309F12Rik	ENSMUSG00000063446	4	49072145	49353131
Acnat2	ENSMUSG00000060317	4	49392712	49421023
Acnat1	ENSMUSG00000070985	4	49459977	49486784
Baat	ENSMUSG00000039653	4	49502294	49519429
Mrpl50	ENSMUSG00000044018	4	49525468	49533965
Zfp189	ENSMUSG00000039634	4	49534048	49544389
Aldob	ENSMUSG00000028307	4	49548867	49562418
2810432L12Rik	ENSMUSG00000039611	4	49597378	49610748
Rnf20	ENSMUSG00000028309	4	49644878	49669759
Grin3a	ENSMUSG00000039579	4	49674483	49858616
Ppp3r2	ENSMUSG00000028310	4	49691619	49694896
Gm12439	ENSMUSG00000080850	4	48688028	48688392
Gm12438	ENSMUSG00000083091	4	48758387	48758722
Gm12437	ENSMUSG00000082384	4	48820009	48820263
Gm12436	ENSMUSG00000084787	4	48911465	48976109
Gm12442	ENSMUSG00000083869	4	48985850	48986187
Gm12453	ENSMUSG00000081902	4	49355120	49355450
Rbpsuh-ps1	ENSMUSG00000081770	4	49363394	49364399
Gm12451	ENSMUSG00000082725	4	49408984	49420604
Gm12452	ENSMUSG00000081380	4	49425179	49425509
Gm12459	ENSMUSG00000083153	4	49759603	49760118
Gm12458	ENSMUSG00000081120	4	50063781	50064275
AL807771.1	ENSMUSG00000093240	4	48775723	48775834
SNORA17	ENSMUSG00000077308	4	50299618	50299749
SNORA17	ENSMUSG00000077417	4	48909371	48909495
U6	ENSMUSG00000064782	4	49302170	49302275
U6	ENSMUSG00000084479	4	49487179	49487282
Cylc2	ENSMUSG00000039555	4	51229550	51242800
Gm12460	ENSMUSG00000084116	4	51202979	51203335
Amd-ps4	ENSMUSG00000019836	4	51265897	51266899
Gm17527	ENSMUSG00000091678	4	51267042	51267235
7SK	ENSMUSG00000087958	4	51553619	51553887
Gm12461	ENSMUSG00000081050	4	51905765	51907003
C630028M04Rik	ENSMUSG00000085515	4	51980966	52063982
Gm12465	ENSMUSG00000082963	4	52090040	52090339
SNORA17	ENSMUSG00000088515	4	51668639	51668747
RNaseP_nuc	ENSMUSG00000088954	4	51812792	51813224
U1	ENSMUSG00000064923	4	51825355	51825519
Gm12466	ENSMUSG00000083539	4	52253775	52254394
Gm12467	ENSMUSG00000082267	4	52254584	52255328
Smc2	ENSMUSG00000028312	4	52452115	52501237
Vma21-ps	ENSMUSG00000061619	4	52509703	52510178
4930547C10Rik	ENSMUSG00000028314	4	52609146	52625302
Olfr275	ENSMUSG00000089717	4	52838271	52839230
Olfr273	ENSMUSG00000049648	4	52868386	52871338
Olfr272	ENSMUSG00000051593	4	52923705	52932044
Olfr270	ENSMUSG00000070983	4	52983495	52984439
Nipsnap3a	ENSMUSG00000015242	4	53002144	53014034
Nipsnap3b	ENSMUSG00000015247	4	53024752	53034932
Abca1	ENSMUSG00000015243	4	53043659	53172767
AI427809	ENSMUSG00000073854	4	53274765	53275419
Gm12475	ENSMUSG00000083338	4	52373695	52375083
2700081L22Rik	ENSMUSG00000085763	4	52443157	52451837
Gm12483	ENSMUSG00000084380	4	52456787	52457044
4930552N02Rik	ENSMUSG00000070984	4	52827476	52841141
Gm12482	ENSMUSG00000081975	4	52834360	52834989
Cct3-ps1	ENSMUSG00000083937	4	52913471	52915555
Olfr271-ps1	ENSMUSG00000082216	4	52948302	52949253
4930412L05Rik	ENSMUSG00000087192	4	53217938	53230729
4930522O17Rik	ENSMUSG00000086947	4	53259068	53263987
AI427809	ENSMUSG00000086712	4	53275604	53283104
Gm12495	ENSMUSG00000083735	4	53321098	53321544
Gm12496	ENSMUSG00000086267	4	53414820	53416902
Slc44a1	ENSMUSG00000028412	4	53453285	53635350
1700060J05Rik	ENSMUSG00000084970	4	53575855	53577569
Fsd1l	ENSMUSG00000054752	4	53644343	53719881
Gm10979	ENSMUSG00000078702	4	53715169	53715581
Fktn	ENSMUSG00000028414	4	53726870	53778657
Gm12470	ENSMUSG00000081516	4	53675168	53676216
7SK	ENSMUSG00000089621	4	53733774	53734072
Tal2	ENSMUSG00000028417	4	53792577	53801584
Tmem38b	ENSMUSG00000028420	4	53838917	53874891
Rps15a-ps8	ENSMUSG00000084403	4	53803942	53804328
Gm12468	ENSMUSG00000083985	4	53890797	53891200
SNORA17	ENSMUSG00000077418	4	53918568	53918692
n-R5s185	ENSMUSG00000065887	4	53873524	53873642
SNORA17	ENSMUSG00000089552	4	54016929	54017059
Gm12484	ENSMUSG00000086987	4	54164703	54176550
Gm12469	ENSMUSG00000083624	4	54248542	54248748
Zfp462	ENSMUSG00000060206	4	54957920	55096435
Rad23b	ENSMUSG00000028426	4	55362915	55405109
Klf4	ENSMUSG00000003032	4	55540013	55545347
Actl7b	ENSMUSG00000070980	4	56752879	56754297
Actl7a	ENSMUSG00000070979	4	56756294	56757797
Ikbkap	ENSMUSG00000028431	4	56762552	56815203
BC026590	ENSMUSG00000038827	4	56815217	56822473
Ctnnal1	ENSMUSG00000038816	4	56823807	56878060
D730040F13Rik	ENSMUSG00000055296	4	56879795	56960309
6430704M03Rik	ENSMUSG00000045589	4	56970045	57003263
Epb4.1l4b	ENSMUSG00000028434	4	57004844	57156309
Gm12515	ENSMUSG00000082704	4	55129435	55129795
Gm12514	ENSMUSG00000087614	4	55144080	55292351
Gm12509	ENSMUSG00000081177	4	55175880	55176488
Gm12508	ENSMUSG00000081504	4	55267609	55268091
Gm12512	ENSMUSG00000081542	4	55294936	55295152
Gm12516	ENSMUSG00000084144	4	55405189	55405573
Gm12513	ENSMUSG00000084404	4	55421828	55422179
Gm12505	ENSMUSG00000087070	4	55423315	55431714
Gm12510	ENSMUSG00000086346	4	55463556	55478686
Gm12507	ENSMUSG00000082952	4	55521166	55521580
Gm12511	ENSMUSG00000066176	4	55576137	55612168
Gm12506	ENSMUSG00000085375	4	55618021	55649773
Gm12519	ENSMUSG00000085643	4	55981895	56006611
Gm12520	ENSMUSG00000081290	4	56175812	56176127
2310081O03Rik	ENSMUSG00000085020	4	56233489	56237393
Gm12518	ENSMUSG00000082613	4	56400674	56401452
SNORA44	ENSMUSG00000064595	4	56926514	56926639
SNORA42	ENSMUSG00000080370	4	56774794	56774913
SNORA17	ENSMUSG00000077635	4	55481897	55482031
SNORA43	ENSMUSG00000077170	4	56910498	56910629
SNORA17	ENSMUSG00000077663	4	56691776	56691907
Mir32	ENSMUSG00000065544	4	56908101	56908170
BX470220.1	ENSMUSG00000092886	4	56968294	56968363
U3	ENSMUSG00000077403	4	55312528	55312717
Gm12530	ENSMUSG00000085967	4	57184943	57189426
Ptpn3	ENSMUSG00000038764	4	57203713	57314709
Gm12536	ENSMUSG00000085654	4	57312968	57320177
1700042G15Rik	ENSMUSG00000087044	4	57373740	57377164
Gm12537	ENSMUSG00000078696	4	57383645	57384897
Gm12538	ENSMUSG00000081540	4	57426583	57427068
Gm11487	ENSMUSG00000066137	4	73062066	73066106
Gm11237	ENSMUSG00000066136	4	73268913	73288075
Gm11236	ENSMUSG00000073819	4	73284035	73288075
Gm11238	ENSMUSG00000073818	4	73299134	73303177
Gm11239	ENSMUSG00000073817	4	73314258	73318301
Gm428	ENSMUSG00000070946	4	73329420	73333462
Rasef	ENSMUSG00000043003	4	73360483	73436613
Gm11758	ENSMUSG00000078663	4	73518123	73522170
Gm11757	ENSMUSG00000078662	4	73532970	73537016
Gm13871	ENSMUSG00000078661	4	73547811	73551857
Gm11756	ENSMUSG00000078660	4	73562632	73566664
2310002L09Rik	ENSMUSG00000028396	4	73585275	73596750
Frmd3	ENSMUSG00000049122	4	73659338	73848118
Kdm4c	ENSMUSG00000028397	4	73888401	74051764
Gm11486	ENSMUSG00000080222	4	73076335	73079724
Gm11485	ENSMUSG00000082566	4	73083179	73084353
Gm11488	ENSMUSG00000081871	4	73158649	73159511
Gm11240	ENSMUSG00000085034	4	73437150	73444276
Gm13867	ENSMUSG00000083530	4	73510301	73510996
Gm11760	ENSMUSG00000081048	4	73690292	73691087
Gm11405	ENSMUSG00000083767	4	73874101	73875656
A230083N12Rik	ENSMUSG00000085482	4	73896228	73897618
Gm11254	ENSMUSG00000081438	4	74309587	74310239
Gm11258	ENSMUSG00000083659	4	74334011	74335228
Gm11253	ENSMUSG00000082533	4	74727404	74727604
Gm11257	ENSMUSG00000084311	4	74774616	74774930
Gm12912	ENSMUSG00000081067	4	74793513	74794893
SNORA17	ENSMUSG00000077496	4	74281123	74281254
SNORA17	ENSMUSG00000077312	4	73250116	73250248
Tas1r3	ENSMUSG00000029072	4	155233377	155237471
Mmp23	ENSMUSG00000029061	4	155024764	155027493
Ttll10	ENSMUSG00000029074	4	155408949	155433453
Gm10564	ENSMUSG00000073686	4	154416155	154419531
Pex10	ENSMUSG00000029047	4	154441125	154446542
Rer1	ENSMUSG00000029048	4	154448219	154460491
Morn1	ENSMUSG00000029049	4	154460686	154519614
Ski	ENSMUSG00000029050	4	154528184	154596701
2610002J02Rik	ENSMUSG00000073684	4	154623911	154630793
Prkcz	ENSMUSG00000029053	4	154634238	154735470
Gabrd	ENSMUSG00000029054	4	154759089	154772221
2010015L04Rik	ENSMUSG00000042233	4	154783299	154822053
C030017K20Rik	ENSMUSG00000078490	4	154825679	154840639
Tmem52	ENSMUSG00000023153	4	154843223	154844966
Gnb1	ENSMUSG00000029064	4	154865470	154933378
9430015G10Rik	ENSMUSG00000059939	4	155484091	155501374
Agrn	ENSMUSG00000041936	4	155539399	155571536
Cpsf3l	ENSMUSG00000029034	4	155243655	155263212
Pusl1	ENSMUSG00000051557	4	155261988	155265890
Acap3	ENSMUSG00000029033	4	155265984	155281360
Ube2j2	ENSMUSG00000023286	4	155317940	155333713
Fam132a	ENSMUSG00000023571	4	155336427	155340738
B3galt6	ENSMUSG00000050796	4	155363575	155366787
Sdf4	ENSMUSG00000029076	4	155366981	155387719
Tnfrsf4	ENSMUSG00000029075	4	155387952	155390721
Tnfrsf18	ENSMUSG00000041954	4	155400273	155403004
Dvl1	ENSMUSG00000029071	4	155221511	155233412
Gm17585	ENSMUSG00000090418	4	155144078	155150270
Gltpd1	ENSMUSG00000029073	4	155238832	155243549
Pank4	ENSMUSG00000029056	4	154338232	154355047
Plch2	ENSMUSG00000029055	4	154357224	154430893
Mib2	ENSMUSG00000029060	4	155028786	155043307
B930041F14Rik	ENSMUSG00000074738	4	155068451	155070590
Ssu72	ENSMUSG00000029038	4	155078909	155107988
1500002C15Rik	ENSMUSG00000073681	4	155107973	155108359
Gm5151	ENSMUSG00000084845	4	155108909	155114673
Atad3a	ENSMUSG00000029036	4	155114750	155135207
Vwa1	ENSMUSG00000042116	4	155142258	155148807
Tmem88b	ENSMUSG00000073680	4	155155700	155159983
E230028L10Rik	ENSMUSG00000078487	4	155164548	155173612
Mrpl20	ENSMUSG00000029066	4	155177645	155183885
Ccnl2	ENSMUSG00000029068	4	155186598	155198652
Aurkaip1	ENSMUSG00000065990	4	155205381	155207239
Gm10562	ENSMUSG00000073679	4	155213601	155214287
Nadk	ENSMUSG00000029063	4	154936487	154965110
Slc35e2	ENSMUSG00000042202	4	154975525	154997449
Gm10563	ENSMUSG00000073682	4	154988522	155019608
Cdk11b	ENSMUSG00000029062	4	154998963	155024047
5830444B04Rik	ENSMUSG00000084803	4	154772872	154795813
Gm13171	ENSMUSG00000082429	4	154876425	154876815
Gm16023	ENSMUSG00000086682	4	154982409	154998864
Gm16024	ENSMUSG00000085063	4	154990518	154990896
B930041F14Rik	ENSMUSG00000091921	4	155068451	155070590
2610204G22Rik	ENSMUSG00000054514	4	155135287	155143373
Gm13644	ENSMUSG00000085119	4	155151585	155158075
Gm16008	ENSMUSG00000087381	4	155397836	155405752
Gm13648	ENSMUSG00000086549	4	155426824	155433911
9930005F22Rik	ENSMUSG00000073672	4	155504622	155507524
Isg15	ENSMUSG00000035692	4	155573533	155574927
AW011738	ENSMUSG00000078349	4	155577413	155579260
2310042D19Rik	ENSMUSG00000078486	4	155590036	155595416
Plekhn1	ENSMUSG00000078485	4	155595565	155602651
Klhl17	ENSMUSG00000078484	4	155603153	155608966
Mxra8	ENSMUSG00000029070	4	155213789	155218197
AL627204.1	ENSMUSG00000092798	4	155303712	155303988
AL627405.1	ENSMUSG00000093431	4	155004113	155004183
AL670236.2	ENSMUSG00000092817	4	155163690	155163815
Mir200b	ENSMUSG00000065549	4	155429790	155429859
AL670236.1	ENSMUSG00000080471	4	155285739	155285859
Mir429	ENSMUSG00000065427	4	155428014	155428096
U6	ENSMUSG00000088545	4	155397167	155397267
Mir200a	ENSMUSG00000065400	4	155429005	155429094
U6	ENSMUSG00000064916	4	155094149	155094250
Limch1	ENSMUSG00000037736	5	67137074	67448398
Phox2b	ENSMUSG00000012520	5	67485636	67490540
Tmem33	ENSMUSG00000037720	5	67651804	67682700
Slc30a9	ENSMUSG00000029221	5	67698194	67749804
Bend4	ENSMUSG00000092060	5	67783386	67819038
Shisa3	ENSMUSG00000050010	5	67999122	68014791
Atp8a1	ENSMUSG00000037685	5	68009379	68238671
Grxcr1	ENSMUSG00000068082	5	68423074	68557637
Gm6517	ENSMUSG00000082420	5	67281603	67282123
Gm15949	ENSMUSG00000085839	5	67376330	67376880
Gm15948	ENSMUSG00000086964	5	67380055	67382446
Gm15478	ENSMUSG00000085363	5	68033640	68038015
Gm15477	ENSMUSG00000087261	5	68238305	68300252
Gm16714	ENSMUSG00000085339	5	67818919	67829229
AC119834.1	ENSMUSG00000080601	5	67444918	67445031
SNORA17	ENSMUSG00000087880	5	68957409	68957535
AC123662.1	ENSMUSG00000093151	5	68023064	68023158
Gabrb1	ENSMUSG00000029212	5	72091171	72529628
Commd8	ENSMUSG00000029213	5	72548239	72559422
Corin	ENSMUSG00000005220	5	72691264	72895712
Nfxl1	ENSMUSG00000072889	5	72904540	72950923
Zar1	ENSMUSG00000063935	5	72968353	72972323
Gm5868	ENSMUSG00000060204	5	72972878	72978789
Cnga1	ENSMUSG00000067220	5	72994935	73033991
Nipal1	ENSMUSG00000067219	5	73039035	73062317
Txk	ENSMUSG00000054892	5	73087217	73144012
Tec	ENSMUSG00000029217	5	73146957	73259722
Slain2	ENSMUSG00000036087	5	73305543	73370068
Gm10135	ENSMUSG00000063656	5	73357047	73365941
Slc10a4	ENSMUSG00000029219	5	73398143	73405922
Fryl	ENSMUSG00000070733	5	73411561	73647857
Fryl	ENSMUSG00000090491	5	73585067	73647827
Ociad1	ENSMUSG00000029152	5	73684033	73705316
Ociad2	ENSMUSG00000029153	5	73713438	73730186
Cwh43	ENSMUSG00000029154	5	73797315	73844674
Dcun1d4	ENSMUSG00000051674	5	73872241	73952033
Lrrc66	ENSMUSG00000067206	5	73997882	74023744
Sgcb	ENSMUSG00000029156	5	74023988	74038983
Spata18	ENSMUSG00000029155	5	74042619	74070723
Gm15617	ENSMUSG00000080736	5	72423957	72424727
Gm15616	ENSMUSG00000082705	5	72438444	72438818
Atp10d	ENSMUSG00000046808	5	72594568	72690014
RP23-193A2.2	ENSMUSG00000093400	5	72707593	72759287
Gm19560	ENSMUSG00000093644	5	72800683	72801196
AU023070	ENSMUSG00000093771	5	72887439	72888343
Gm9870	ENSMUSG00000052154	5	73305535	73306181
Gm15847	ENSMUSG00000081849	5	73404738	73408615
1700071G01Rik	ENSMUSG00000086376	5	73548253	73549119
Gm17207	ENSMUSG00000090561	5	73601348	73603873
Gm15653	ENSMUSG00000082039	5	73867683	73868592
U6	ENSMUSG00000088268	5	73362418	73362503
U6	ENSMUSG00000089195	5	72696604	72696701
U6	ENSMUSG00000065000	5	72809952	72810058
Usp46	ENSMUSG00000054814	5	74394487	74464455
Rasl11b	ENSMUSG00000049907	5	74591321	74595503
Scfd2	ENSMUSG00000062110	5	74600841	74927772
Fip1l1	ENSMUSG00000029227	5	74931474	74994815
Lnx1	ENSMUSG00000029228	5	74988471	75098936
Chic2	ENSMUSG00000029229	5	75397051	75440799
Gsx2	ENSMUSG00000035946	5	75471489	75473918
Gsx2	ENSMUSG00000092446	5	75471626	75473918
Pdgfra	ENSMUSG00000029231	5	75548316	75594229
1700094C10Rik	ENSMUSG00000087250	5	74410241	74425705
1700112M01Rik	ENSMUSG00000086234	5	74428299	74436021
2700023E23Rik	ENSMUSG00000053656	5	74489085	74491430
Gm15981	ENSMUSG00000080700	5	74712591	74713054
Gm15982	ENSMUSG00000084132	5	74752591	74754440
Gm15984	ENSMUSG00000085657	5	75098624	75124630
Gm15985	ENSMUSG00000085497	5	75127542	75130475
Gm6116	ENSMUSG00000072874	5	75345219	75362393
U6	ENSMUSG00000088210	5	75768066	75768170
Snora26	ENSMUSG00000093355	5	74489555	74489675
Kit	ENSMUSG00000005672	5	75970941	76052747
U6	ENSMUSG00000089078	5	75957071	75957175
Tecrl	ENSMUSG00000049537	5	83707170	83784220
Epha5	ENSMUSG00000029245	5	84486816	84846407
Gm15626	ENSMUSG00000081822	5	83728610	83729477
Hmgn2-ps1	ENSMUSG00000079067	5	84552259	84553414
U6	ENSMUSG00000089162	5	83232790	83232886
SNORA17	ENSMUSG00000077288	5	84077848	84077979
SNORA17	ENSMUSG00000077474	5	84152487	84152614
Mir1187	ENSMUSG00000080586	5	83227969	83228090
U4	ENSMUSG00000084731	5	84119029	84119150
Gm17312	ENSMUSG00000074422	5	85680725	85681837
Cds1	ENSMUSG00000029330	5	102194149	102252877
Wdfy3	ENSMUSG00000043940	5	102261972	102498940
Arhgap24	ENSMUSG00000057315	5	102910410	103326955
Mapk10	ENSMUSG00000046709	5	103336967	103640353
Ptpn13	ENSMUSG00000034573	5	103854211	104027378
Slc10a6	ENSMUSG00000029321	5	104034730	104058422
1700016H13Rik	ENSMUSG00000029320	5	104077058	104085029
Gm20548	ENSMUSG00000092354	5	102266435	102275429
Gm15844	ENSMUSG00000084126	5	104053490	104054065
U1	ENSMUSG00000088121	5	104087256	104087426
7SK	ENSMUSG00000088474	5	104031606	104031898
Aff1	ENSMUSG00000029313	5	104121393	104284341
Gm17725	ENSMUSG00000091555	6	51329709	51342776
Gm15055	ENSMUSG00000085412	6	52052948	52062531
Gm8078	ENSMUSG00000081979	6	52068241	52068890
Gm15052	ENSMUSG00000082781	6	52081777	52082045
Gm15051	ENSMUSG00000087658	6	52106901	52112118
5730446D14Rik	ENSMUSG00000056445	6	52115673	52119563
Gm15050	ENSMUSG00000087626	6	52122880	52124058
2700086A05Rik	ENSMUSG00000085696	6	52125216	52165075
9930038K12Rik	ENSMUSG00000092475	6	52178246	52180531
9930038K12Rik	ENSMUSG00000056583	6	52180079	52180529
Hoxa11as	ENSMUSG00000086427	6	52194392	52199798
Gm15053	ENSMUSG00000055408	6	52212769	52217597
5730457N03Rik	ENSMUSG00000086126	6	52258383	52264826
Gm8129	ENSMUSG00000059159	6	52296724	52296939
Gm15054	ENSMUSG00000084282	6	52307538	52307818
Gm15572	ENSMUSG00000081872	6	52793103	52793695
Gm15573	ENSMUSG00000080759	6	52995878	52996417
Hnrnpa2b1	ENSMUSG00000004980	6	51410433	51419893
Cbx3	ENSMUSG00000029836	6	51420359	51433703
Snx10	ENSMUSG00000038301	6	51473900	51540678
Skap2	ENSMUSG00000059182	6	51809165	51962548
Hoxa1	ENSMUSG00000029844	6	52105366	52108316
Hoxa2	ENSMUSG00000014704	6	52112350	52115412
RP23-103L13.8	ENSMUSG00000093412	6	52113358	52163338
Hoxa3	ENSMUSG00000079560	6	52118509	52163335
5730596B20Rik	ENSMUSG00000056468	6	52127497	52130850
Hoxa4	ENSMUSG00000000942	6	52139670	52141752
Hoxa3	ENSMUSG00000059723	6	52149150	52163335
Hoxa5	ENSMUSG00000038253	6	52151753	52154586
Hoxa6	ENSMUSG00000043219	6	52155430	52161355
Hoxa7	ENSMUSG00000038236	6	52164490	52171853
Hoxa9	ENSMUSG00000038227	6	52173099	52181088
Hoxa10	ENSMUSG00000000938	6	52181196	52190853
Hoxa11	ENSMUSG00000038210	6	52192107	52196213
Hoxa13	ENSMUSG00000038203	6	52207693	52210874
Evx1	ENSMUSG00000005503	6	52263492	52268372
Hibadh	ENSMUSG00000029776	6	52496222	52590383
Nfe2l3	ENSMUSG00000029832	6	51382669	51408767
Tax1bp1	ENSMUSG00000004535	6	52663723	52716774
Jazf1	ENSMUSG00000063568	6	52718791	53018625
SCARNA20	ENSMUSG00000089209	6	52960388	52960526
Mir148a	ENSMUSG00000065505	6	51219811	51219909
SNORA32	ENSMUSG00000064792	6	52589228	52589349
AC153877.1	ENSMUSG00000092936	6	51571631	51571707
Mir196b	ENSMUSG00000065443	6	52180080	52180164
9530036M11Rik	ENSMUSG00000087670	6	54096881	54100931
Gm15526	ENSMUSG00000080205	6	54127474	54127677
9430076C15Rik	ENSMUSG00000090982	6	53237289	53397716
Creb5	ENSMUSG00000053007	6	53523378	53646001
Tril	ENSMUSG00000043496	6	53765465	53770819
Gm16499	ENSMUSG00000078169	6	53769969	53770034
Cpvl	ENSMUSG00000052955	6	53823373	53928656
Chn2	ENSMUSG00000004633	6	53989548	54251804
U1	ENSMUSG00000065216	6	53383968	53384131
SNORA17	ENSMUSG00000077773	6	53822011	53822142
Gm15527	ENSMUSG00000086946	6	54195736	54229070
9130019P16Rik	ENSMUSG00000073067	6	54219675	54380215
Gm15534	ENSMUSG00000086176	6	64940949	64941502
Grid2	ENSMUSG00000071424	6	63205870	64618276
Atoh1	ENSMUSG00000073043	6	64679140	64681227
Smarcad1	ENSMUSG00000029920	6	64992661	65066044
Hpgds	ENSMUSG00000029919	6	65067287	65094902
U6	ENSMUSG00000088721	6	63150035	63150146
U6	ENSMUSG00000064775	6	64363642	64363744
Gm17147	ENSMUSG00000090939	6	65078565	65078996
C130060K24Rik	ENSMUSG00000029917	6	65331099	65408144
A930038C07Rik	ENSMUSG00000049001	6	65621584	65656924
Prdm5	ENSMUSG00000029913	6	65728982	65886367
4930544G11Rik	ENSMUSG00000036463	6	65902565	65904006
Gm15490	ENSMUSG00000082115	6	65707930	65708315
Gm16838	ENSMUSG00000085689	6	65718538	65729243
Gm20445	ENSMUSG00000092394	6	65832773	65833337
Tnip3	ENSMUSG00000044162	6	65540392	65584034
U6	ENSMUSG00000088832	6	65814165	65814270
U6	ENSMUSG00000064391	6	65939634	65939733
9230107M04Rik	ENSMUSG00000078800	7	14140212	14156413
Sult2a5	ENSMUSG00000078799	7	14209341	14256150
Sult2a2	ENSMUSG00000070811	7	14318855	14364985
Sult2a1	ENSMUSG00000078798	7	14381601	14422759
Sult2a4	ENSMUSG00000074377	7	14495026	14574974
Sult2a3	ENSMUSG00000074375	7	14652801	14708393
Sult2a6	ENSMUSG00000070810	7	14807730	14840216
2810007J24Rik	ENSMUSG00000030378	7	14996036	15032118
Vmn1r90	ENSMUSG00000041596	7	15116003	15208415
Gm4745	ENSMUSG00000055942	7	15245057	15251344
Obox2	ENSMUSG00000074369	7	15939386	15983894
Obox3	ENSMUSG00000066772	7	16065174	16225251
Gm15436	ENSMUSG00000082586	7	14306427	14307816
Gm6168	ENSMUSG00000081982	7	14431510	14432905
Gm15437	ENSMUSG00000084102	7	14720771	14726354
Gm15439	ENSMUSG00000080705	7	14756985	14778873
Gm18355	ENSMUSG00000093773	7	15219388	15219922
Gm8057	ENSMUSG00000093665	7	15279424	15281023
RP24-194K24.4	ENSMUSG00000093549	7	15353074	15353794
RP24-370G23.6	ENSMUSG00000093664	7	15363364	15363580
Gm8040	ENSMUSG00000093584	7	15385573	15387175
RP23-349I13.2	ENSMUSG00000093736	7	15452941	15453664
RP23-349I13.1	ENSMUSG00000093389	7	15490807	15491530
Gm8064	ENSMUSG00000093509	7	15516985	15518587
Gm3959	ENSMUSG00000093567	7	15592423	15593136
Gm3965	ENSMUSG00000093707	7	15609340	15611047
Gm8072	ENSMUSG00000093770	7	15641548	15643153
Gm3968	ENSMUSG00000093630	7	15714517	15715240
Gm3977	ENSMUSG00000093742	7	15724895	15726833
Gm3980	ENSMUSG00000093613	7	15736264	15737977
Gm3981	ENSMUSG00000093623	7	15747595	15749298
Gm3984	ENSMUSG00000093494	7	15758674	15760390
Gm3987	ENSMUSG00000093723	7	15770017	15771730
Gm3989	ENSMUSG00000093415	7	15781330	15783043
Gm3994	ENSMUSG00000093532	7	15792661	15794374
Gm3996	ENSMUSG00000093591	7	15803989	15805705
Gm3998	ENSMUSG00000093527	7	15815293	15817009
Gm4001	ENSMUSG00000093612	7	15826621	15828337
Gm4003	ENSMUSG00000093636	7	15837961	15839674
Gm4897	ENSMUSG00000093464	7	15849292	15851005
Gm8053	ENSMUSG00000093727	7	15879298	15880897
RP24-84K14.9	ENSMUSG00000093377	7	15892361	15892784
RP24-370G23.8	ENSMUSG00000093554	7	15928867	15929590
Gm10679	ENSMUSG00000093643	7	16017011	16018949
Gm10678	ENSMUSG00000093435	7	16028347	16030285
Gm4014	ENSMUSG00000093397	7	16039672	16041382
RP23-163B8.3	ENSMUSG00000093421	7	16065523	16067130
Gm4016	ENSMUSG00000093719	7	16087171	16088118
Obox1	ENSMUSG00000054310	7	16097689	16142215
U6	ENSMUSG00000064977	7	15364018	15364121
U6	ENSMUSG00000075887	7	15497707	15497811
Gm4018	ENSMUSG00000093513	7	16175002	16176709
U6	ENSMUSG00000075966	7	16178580	16178684
Gm4023	ENSMUSG00000093420	7	16276999	16278709
U6	ENSMUSG00000075896	7	16280562	16280666
9330104G04Rik	ENSMUSG00000091869	7	17456703	17460235
RP24-370G23.10	ENSMUSG00000093683	7	16305115	16305481
Gm7235	ENSMUSG00000092576	7	16405228	16411054
RP24-370G23.7	ENSMUSG00000093678	7	16435663	16436065
Bbc3	ENSMUSG00000002083	7	16894965	16903554
Sae1	ENSMUSG00000052833	7	16905583	16973146
Zc3h4	ENSMUSG00000059273	7	16986230	17023043
Tmem160	ENSMUSG00000019158	7	17038128	17040838
Npas1	ENSMUSG00000001988	7	17041070	17062129
Grlf1	ENSMUSG00000058230	7	17079822	17200342
Ceacam15	ENSMUSG00000078795	7	17256680	17261054
Ceacam9	ENSMUSG00000007209	7	17307278	17311459
Ap2s1	ENSMUSG00000008036	7	17323759	17334643
Slc1a5	ENSMUSG00000001918	7	17366695	17383623
Fkrp	ENSMUSG00000048920	7	17394619	17400478
Strn4	ENSMUSG00000030374	7	17401238	17426280
Prkd2	ENSMUSG00000041187	7	17428283	17455810
Dact3	ENSMUSG00000078794	7	17460666	17472650
Gng8	ENSMUSG00000063594	7	17477135	17480784
Obox5	ENSMUSG00000074366	7	16335483	16345149
Obox6	ENSMUSG00000041583	7	16418595	16425027
Crx	ENSMUSG00000041578	7	16451296	16465317
Crxos1	ENSMUSG00000074365	7	16467966	16489379
Sepw1	ENSMUSG00000041571	7	16502557	16507751
Gltscr2	ENSMUSG00000041560	7	16523187	16531457
Ehd2	ENSMUSG00000074364	7	16532326	16552916
Gltscr1	ENSMUSG00000070808	7	16556611	16584844
Zfp541	ENSMUSG00000078796	7	16657291	16681677
Napa	ENSMUSG00000006024	7	16683807	16703324
Kptn	ENSMUSG00000006021	7	16705244	16712865
Slc8a2	ENSMUSG00000030376	7	16715509	16745858
Meis3	ENSMUSG00000041420	7	16760439	16771859
Dhx34	ENSMUSG00000006019	7	16782496	16807386
Gpr77	ENSMUSG00000074361	7	16819934	16829503
C5ar1	ENSMUSG00000049130	7	16832092	16844889
Prr24	ENSMUSG00000091811	7	16857363	16859041
Ccdc9	ENSMUSG00000041375	7	16859391	16872144
U6	ENSMUSG00000064745	7	17209924	17210026
AC150681.1	ENSMUSG00000093078	7	17295966	17296036
n-R5s151	ENSMUSG00000065893	7	17057162	17057280
AC148990.1	ENSMUSG00000093249	7	16531597	16531839
Snord23	ENSMUSG00000080478	7	16524111	16524219
U6atac	ENSMUSG00000080413	7	16820087	16820213
Gm6065	ENSMUSG00000063830	7	18377923	18378414
Ptgir	ENSMUSG00000043017	7	17491839	17496254
Calm3	ENSMUSG00000019370	7	17500728	17509463
Pnmal2	ENSMUSG00000070802	7	17530031	17532427
Pnmal1	ENSMUSG00000041141	7	17545144	17547668
Ccdc8	ENSMUSG00000041117	7	17578057	17582864
Ppp5c	ENSMUSG00000003099	7	17589989	17613273
Hif3a	ENSMUSG00000004328	7	17616856	17647776
Psg16	ENSMUSG00000066760	7	17659389	17718799
Ceacam3	ENSMUSG00000053228	7	17735631	17749602
Psg29	ENSMUSG00000023159	7	17788826	17801105
Psg-ps1	ENSMUSG00000090442	7	18257662	18267409
Ceacam5	ENSMUSG00000008789	7	18298601	18346475
Ceacam14	ENSMUSG00000023185	7	18397982	18401012
Gm5155	ENSMUSG00000078793	7	18457116	18504373
Ceacam11	ENSMUSG00000030368	7	18557473	18563905
Ceacam13	ENSMUSG00000057195	7	18595238	18604570
Ceacam12	ENSMUSG00000030366	7	18651278	18663335
Igfl3	ENSMUSG00000066756	7	18761843	18767211
Mill1	ENSMUSG00000054005	7	18830696	18851441
Psg18	ENSMUSG00000003505	7	18931157	18940356
Psg28	ENSMUSG00000030373	7	19007887	19017404
Psg26	ENSMUSG00000070799	7	19059932	19069498
Psg25	ENSMUSG00000070798	7	19105053	19117576
Psg27	ENSMUSG00000070797	7	19141864	19152654
Psg23	ENSMUSG00000074359	7	19191692	19201850
Psg21	ENSMUSG00000070796	7	19232003	19242074
U6	ENSMUSG00000064689	7	17538744	17538850
AC151983.1	ENSMUSG00000076355	7	18771038	18771138
AC151601.1	ENSMUSG00000084614	7	18046672	18046781
AC134475.1	ENSMUSG00000093207	7	18602601	18602701
AC138311.2	ENSMUSG00000077108	7	18196115	18196224
AC126443.1	ENSMUSG00000084594	7	18122326	18122435
U6	ENSMUSG00000065313	7	19134434	19134540
AC151412.1	ENSMUSG00000076332	7	19003188	19003282
U7	ENSMUSG00000089483	7	18846813	18846875
AC138311.1	ENSMUSG00000077083	7	18203519	18203628
A730056A06Rik	ENSMUSG00000092033	7	80458889	80520625
Gm10294	ENSMUSG00000081895	7	79793613	79794216
Gm4971	ENSMUSG00000091647	7	80830418	80831467
Mctp2	ENSMUSG00000032776	7	79222718	79451481
Gm4885	ENSMUSG00000070035	7	79817704	79819164
Rgma	ENSMUSG00000070509	7	80520406	80564785
Chd2	ENSMUSG00000078671	7	80571577	80686632
A830073O21Rik	ENSMUSG00000091890	7	80883779	80885803
Fam174b	ENSMUSG00000078670	7	80885193	80921805
Gm10619	ENSMUSG00000074067	7	80953108	80961389
7SK	ENSMUSG00000089391	7	80806934	80807186
U6	ENSMUSG00000065729	7	80790871	80790975
St8sia2	ENSMUSG00000025789	7	81084005	81158568
Gm7580	ENSMUSG00000085161	7	81537584	81556119
Slco3a1	ENSMUSG00000025790	7	81420305	81699666
snoU109	ENSMUSG00000089573	7	81134982	81135120
7SK	ENSMUSG00000089522	7	82107233	82107583
Sv2b	ENSMUSG00000053025	7	82259783	82454148
7SK	ENSMUSG00000088683	7	82419975	82420297
1500012K07Rik	ENSMUSG00000086403	7	82453588	82476305
Akap13	ENSMUSG00000066406	7	82600420	82899495
Klhl25	ENSMUSG00000055652	7	82993224	83019016
AC158749.1	ENSMUSG00000076961	7	82902145	82902254
U6	ENSMUSG00000087896	7	82813759	82813842
Agbl1	ENSMUSG00000025754	7	83462958	83911494
Rlbp1	ENSMUSG00000039194	7	86519757	86531913
Fanci	ENSMUSG00000039187	7	86536815	86595151
Polg	ENSMUSG00000039176	7	86593677	86611248
Det1	ENSMUSG00000030610	7	85967848	85992122
Aen	ENSMUSG00000030609	7	86040740	86056095
Isg20	ENSMUSG00000039236	7	86058310	86065248
Gm16936	ENSMUSG00000087186	7	86162939	86198209
Gm16017	ENSMUSG00000082400	7	86557196	86557403
Acan	ENSMUSG00000030607	7	86198369	86259985
Hapln3	ENSMUSG00000030606	7	86260026	86275895
Mfge8	ENSMUSG00000030605	7	86278655	86293946
Abhd2	ENSMUSG00000039202	7	86418087	86510394
Ntrk3	ENSMUSG00000059146	7	85337248	85723294
Gm9885	ENSMUSG00000052629	7	85723716	85725920
Mrpl46	ENSMUSG00000030612	7	85920122	85928417
Mrps11	ENSMUSG00000030611	7	85928005	85937875
Mir7-2	ENSMUSG00000065609	7	86033163	86033259
7SK	ENSMUSG00000089453	7	86497374	86497631
AC110520.1	ENSMUSG00000092873	7	86178089	86178194
U1	ENSMUSG00000064940	7	85055026	85055206
AC138376.1	ENSMUSG00000080603	7	86158911	86159001
Gm2115	ENSMUSG00000085128	7	91677485	91726847
9930013L23Rik	ENSMUSG00000052353	7	91081367	91235012
Gm16703	ENSMUSG00000087237	7	91300868	91343483
Zfand6	ENSMUSG00000030629	7	91763564	91827861
Olfr291	ENSMUSG00000070460	7	92002083	92005828
Olfr290	ENSMUSG00000070459	7	92064291	92065238
Vmn2r65	ENSMUSG00000066372	7	92088679	92112519
Vmn2r66	ENSMUSG00000072241	7	92143155	92160530
Vmn2r67	ENSMUSG00000091901	7	92284750	92304412
Vmn2r68-ps	ENSMUSG00000066432	7	92370028	92386214
Vmn2r69	ENSMUSG00000091006	7	92554886	92564186
Vmn2r70	ENSMUSG00000090806	7	92707213	92717598
Vmn2r71	ENSMUSG00000091205	7	92763972	92773057
Vmn2r72-ps	ENSMUSG00000051877	7	92886294	92903491
Vmn2r73	ENSMUSG00000070458	7	93006057	93024448
Vmn2r74	ENSMUSG00000090774	7	93100377	93109992
2610206C17Rik	ENSMUSG00000085236	7	91838150	91925059
Gm18958	ENSMUSG00000092429	7	91949544	91951673
Vmn2r-ps62	ENSMUSG00000092217	7	91958938	91959954
Gm6155	ENSMUSG00000068629	7	91983049	91983390
Gm8018	ENSMUSG00000092425	7	92028065	92031035
Gm18560	ENSMUSG00000092214	7	92067889	92069011
Vmn2r-ps64	ENSMUSG00000092530	7	92182537	92183059
Vmn2r-ps65	ENSMUSG00000092422	7	92190287	92190506
Vmn2r-ps66	ENSMUSG00000092621	7	92201585	92219447
Vmn2r-ps67	ENSMUSG00000092211	7	92232490	92232874
Gm18358	ENSMUSG00000092199	7	92237278	92239669
Gm20413	ENSMUSG00000092623	7	92322974	92337622
Vmn2r-ps68	ENSMUSG00000092259	7	92340707	92341567
Gm20414	ENSMUSG00000092562	7	92409199	92409844
Gm20415	ENSMUSG00000092313	7	92436670	92438121
Vmn2r-ps69	ENSMUSG00000090773	7	92452463	92491401
Gm18359	ENSMUSG00000092256	7	92625465	92630525
Vmn2r-ps70	ENSMUSG00000092431	7	92660358	92660659
Gm18360	ENSMUSG00000092467	7	92665233	92667927
Vmn2r-ps71	ENSMUSG00000092628	7	92730018	92730892
Vmn2r-ps72	ENSMUSG00000092533	7	92738160	92739066
Vmn2r-ps73	ENSMUSG00000092567	7	92844866	92847090
Vmn2r-ps74	ENSMUSG00000092352	7	92860801	92861717
Gm18779	ENSMUSG00000092426	7	92933529	92934105
Gm18354	ENSMUSG00000092410	7	92936707	92938158
Vmn2r-ps75	ENSMUSG00000092179	7	92946830	92947446
Vmn2r-ps76	ENSMUSG00000092307	7	92963957	92964695
Vmn2r-ps77	ENSMUSG00000092287	7	92970449	92970768
Vmn2r-ps78	ENSMUSG00000092440	7	93032967	93033274
Vmn2r-ps79	ENSMUSG00000092263	7	93115526	93115902
Vmn2r-ps80	ENSMUSG00000092529	7	93146493	93148096
Vmn2r-ps81	ENSMUSG00000092608	7	93175226	93176063
Fah	ENSMUSG00000030630	7	91733669	91755232
Fam108c	ENSMUSG00000038459	7	91257866	91300403
Arnt2	ENSMUSG00000015709	7	91394791	91558469
AC101659.1	ENSMUSG00000092743	7	91319075	91319232
U6	ENSMUSG00000065227	7	91471819	91471925
AC099599.1	ENSMUSG00000089067	7	91924016	91924133
Olfr293	ENSMUSG00000063394	7	93812174	93813184
Olfr294	ENSMUSG00000062042	7	93764146	93765153
Vmn2r77	ENSMUSG00000090949	7	93943651	93960542
Vmn2r78	ENSMUSG00000091962	7	94063810	94103687
Vmn2r79	ENSMUSG00000090362	7	94144975	94186478
Nox4	ENSMUSG00000030562	7	94394606	94547220
Tyr	ENSMUSG00000004651	7	94574910	94641943
Grm5	ENSMUSG00000049583	7	94750952	95283417
Folh1	ENSMUSG00000001773	7	93867862	93924374
Vmn2r75	ENSMUSG00000090436	7	93296552	93320234
Vmn2r76	ENSMUSG00000091239	7	93373716	93394711
Olfr310	ENSMUSG00000057540	7	93417240	93418321
Olfr309	ENSMUSG00000054054	7	93454695	93462019
Olfr308	ENSMUSG00000054498	7	93469505	93470560
Olfr307	ENSMUSG00000055610	7	93483916	93484927
Olfr305	ENSMUSG00000055571	7	93511886	93512845
Olfr304	ENSMUSG00000062426	7	93534167	93535168
Olfr303	ENSMUSG00000039608	7	93543006	93544045
Olfr301	ENSMUSG00000061549	7	93552359	93561809
Olfr299	ENSMUSG00000020168	7	93613923	93614915
Olfr298	ENSMUSG00000062878	7	93637061	93638059
Olfr297	ENSMUSG00000057067	7	93675269	93676201
Olfr295	ENSMUSG00000059319	7	93732413	93734716
Vmn2r-ps85	ENSMUSG00000092587	7	93329714	93330653
Vmn2r-ps86	ENSMUSG00000092419	7	93334236	93335106
Gm20480	ENSMUSG00000092197	7	93447154	93447403
Olfr306-ps1	ENSMUSG00000092388	7	93501602	93502229
Olfr300-ps1	ENSMUSG00000092401	7	93591531	93592436
Gm17919	ENSMUSG00000092293	7	93690475	93691171
Olfr296-ps1	ENSMUSG00000092372	7	93710244	93711169
Vmn2r-ps87	ENSMUSG00000092195	7	94033375	94034250
Gm19203	ENSMUSG00000092376	7	94055506	94056444
Olfr292	ENSMUSG00000060688	7	93836850	93843894
AC099601.1	ENSMUSG00000076389	7	93447175	93447270
U7	ENSMUSG00000087947	7	95235698	95235761
Ctsc	ENSMUSG00000030560	7	95426595	95459398
Gm17710	ENSMUSG00000091953	7	95427297	95432039
SNORA17	ENSMUSG00000077693	7	95492479	95492611
Olfr711	ENSMUSG00000045013	7	114114882	114118965
Gm1966	ENSMUSG00000073902	7	113744757	113747549
Olfr693	ENSMUSG00000051680	7	113821048	113821999
Olfr694	ENSMUSG00000064223	7	113832296	113833243
Olfr695	ENSMUSG00000057832	7	113857246	113859859
Olfr697	ENSMUSG00000051591	7	113884424	113885470
Olfr698	ENSMUSG00000059087	7	113895965	113896900
Olfr699	ENSMUSG00000052908	7	113933563	113934513
Olfr700	ENSMUSG00000059522	7	113949024	113949974
Olfr701	ENSMUSG00000036744	7	113957643	113964223
Olfr702	ENSMUSG00000056863	7	113967003	113970257
Olfr703	ENSMUSG00000073901	7	113988127	113989086
Olfr704	ENSMUSG00000073900	7	114008496	114009641
Olfr705	ENSMUSG00000047120	7	114016807	114017757
Olfr706	ENSMUSG00000043599	7	114029379	114030329
Olfr707	ENSMUSG00000069390	7	114034698	114035621
Olfr1532-ps1	ENSMUSG00000073899	7	114057714	114058637
Olfr709-ps1	ENSMUSG00000062553	7	114070048	114070971
Olfr710	ENSMUSG00000045581	7	114087581	114091826
Olfr6	ENSMUSG00000036647	7	114099498	114100448
Gm8995	ENSMUSG00000063286	7	113654053	113655185
Gm3765	ENSMUSG00000086261	7	114342257	114343703
Gm15514	ENSMUSG00000057215	7	114386536	114443910
Gm10156	ENSMUSG00000066245	7	115006489	115007619
Olfr485	ENSMUSG00000070411	7	115302432	115303375
Olfr492	ENSMUSG00000061975	7	115466234	115467179
5330417H12Rik	ENSMUSG00000049740	7	114767485	114768675
Cyb5r2	ENSMUSG00000048065	7	114891969	114901510
Ovch2	ENSMUSG00000048236	7	114925058	114944722
Olfr467	ENSMUSG00000066242	7	114958094	114959020
Olfr469	ENSMUSG00000057146	7	114966037	114966981
Olfr470	ENSMUSG00000066243	7	114988301	114989245
Olfr472	ENSMUSG00000073893	7	115046141	115047223
Olfr473	ENSMUSG00000073892	7	115077036	115077968
Olfr474	ENSMUSG00000072312	7	115098157	115099089
Olfr476	ENSMUSG00000073891	7	115110913	115111845
Olfr477	ENSMUSG00000073890	7	115133881	115134813
Olfr478	ENSMUSG00000070415	7	115174911	115175855
Olfr479	ENSMUSG00000043855	7	115198471	115199581
Olfr480	ENSMUSG00000063120	7	115209282	115210310
Olfr481	ENSMUSG00000054236	7	115224310	115225248
Olfr482	ENSMUSG00000059031	7	115238111	115239082
Olfr483	ENSMUSG00000078118	7	115246793	115247857
Olfr484	ENSMUSG00000059996	7	115267713	115268810
Olfr486	ENSMUSG00000063610	7	115315312	115316256
Olfr487	ENSMUSG00000060725	7	115355097	115356041
Olfr488	ENSMUSG00000060549	7	115398706	115399650
Olfr490	ENSMUSG00000058510	7	115429694	115430638
Olfr491	ENSMUSG00000049579	7	115460410	115461342
Olfr493	ENSMUSG00000062710	7	115489549	115490493
Olfr494	ENSMUSG00000059227	7	115511004	115511950
Olfr495	ENSMUSG00000062147	7	115538636	115539628
Olfr497	ENSMUSG00000060059	7	115566087	115567031
Olfr498	ENSMUSG00000058679	7	115608840	115609832
Olfr2	ENSMUSG00000070417	7	114144389	114146119
Olfr713	ENSMUSG00000073898	7	114179650	114180624
Olfr714	ENSMUSG00000049674	7	114217344	114218297
Olfr17	ENSMUSG00000073897	7	114240963	114241928
Gm10081	ENSMUSG00000062987	7	114249426	114250373
Olfr715	ENSMUSG00000060503	7	114271866	114272996
Olfr716	ENSMUSG00000073896	7	114290740	114291843
Nlrp14	ENSMUSG00000016626	7	114310504	114341616
Rbmxl2	ENSMUSG00000073894	7	114352959	114354430
Syt9	ENSMUSG00000062542	7	114514242	114692170
Olfml1	ENSMUSG00000051041	7	114710960	114734608
Ppfibp2	ENSMUSG00000036528	7	114738565	114892096
U7	ENSMUSG00000088237	7	115263984	115264041
AC127431.1	ENSMUSG00000076951	7	114463168	114463277
Mak16	ENSMUSG00000031578	8	32269940	32279196
Tti2	ENSMUSG00000031577	8	32260788	32275174
Gm17443	ENSMUSG00000091819	8	33118976	33126231
Fut10	ENSMUSG00000046152	8	32297803	32372210
Nrg1	ENSMUSG00000062991	8	32928500	33119581
Gm5908	ENSMUSG00000065950	8	33587355	33587801
Gm8051	ENSMUSG00000083588	8	32325358	32325823
Dusp26	ENSMUSG00000039661	8	32199943	32207519
Rnf122	ENSMUSG00000039328	8	32222292	32241954
Snord13	ENSMUSG00000088252	8	32260336	32260439
Y_RNA	ENSMUSG00000084524	8	32771803	32771903
U6	ENSMUSG00000089370	8	33296601	33296720
7SK	ENSMUSG00000088162	8	32654935	32655158
Mir1186	ENSMUSG00000080535	8	32213393	32213514
Tnks	ENSMUSG00000031529	8	35892233	36028744
Gm17578	ENSMUSG00000092129	8	34923675	34943566
Gm17702	ENSMUSG00000091853	8	35157602	35159203
Mboat4	ENSMUSG00000071113	8	35178084	35188239
Leprotl1	ENSMUSG00000031513	8	35198626	35210087
Tmem66	ENSMUSG00000031532	8	35217617	35233899
Gm4889	ENSMUSG00000056797	8	35390964	35391407
Dusp4	ENSMUSG00000031530	8	35870351	35882948
Wrn	ENSMUSG00000031583	8	34344856	34495999
Purg	ENSMUSG00000049184	8	34496797	34527940
5930422O12Rik	ENSMUSG00000048544	8	34539181	34540020
Tex15	ENSMUSG00000009628	8	34627210	34696054
Ppp2cb	ENSMUSG00000009630	8	34710093	34730266
Ubxn8	ENSMUSG00000052906	8	34730058	34752448
Gsr	ENSMUSG00000031584	8	34762995	34808635
1700104B16Rik	ENSMUSG00000049476	8	34841021	34842286
Gtf2e2	ENSMUSG00000031585	8	34842386	34887645
Rbpms	ENSMUSG00000031586	8	34893116	35040313
Dctn6	ENSMUSG00000031516	8	35153474	35171850
Gm6877	ENSMUSG00000083557	8	34301668	34302768
Gm9951	ENSMUSG00000054618	8	35112316	35120100
Gm10131	ENSMUSG00000063412	8	35174442	35174756
Gm9939	ENSMUSG00000054247	8	36028106	36029263
AC134443.1	ENSMUSG00000080434	8	35358910	35359030
SNORA48	ENSMUSG00000088856	8	34802273	34802416
AC123616.1	ENSMUSG00000092649	8	35004156	35004412
Ppp1r3b	ENSMUSG00000046794	8	36438795	36451178
Eri1	ENSMUSG00000031527	8	36528319	36558587
Mfhas1	ENSMUSG00000070056	8	36650852	36742503
Gm16793	ENSMUSG00000087118	8	36645626	36652026
Elmod2	ENSMUSG00000035151	8	85836921	85856385
4933434I20Rik	ENSMUSG00000035057	8	85872370	85906219
Clgn	ENSMUSG00000002190	8	85913766	85952451
Scoc	ENSMUSG00000063253	8	85958392	85982290
Olfr370	ENSMUSG00000047286	8	86064992	86066087
Ndufb7	ENSMUSG00000033938	8	86090570	86095525
Tecr	ENSMUSG00000031708	8	86095599	86118390
Dnajb1	ENSMUSG00000005483	8	86132074	86135801
Gipc1	ENSMUSG00000019433	8	86176577	86188687
Ptger1	ENSMUSG00000019464	8	86190732	86196652
Pkn1	ENSMUSG00000057672	8	86193661	86223078
Ddx39	ENSMUSG00000005481	8	86239076	86250791
Cd97	ENSMUSG00000002885	8	86247150	86265225
Lphn1	ENSMUSG00000013033	8	86424004	86465853
Gm10644	ENSMUSG00000074219	8	86456228	86479104
Asf1b	ENSMUSG00000005470	8	86479406	86494096
Prkaca	ENSMUSG00000005469	8	86496877	86520344
Samd1	ENSMUSG00000079003	8	86521571	86524285
1700067K01Rik	ENSMUSG00000046408	8	86525401	86528669
2210011C24Rik	ENSMUSG00000074217	8	86534129	86535341
Palm3	ENSMUSG00000047986	8	86545370	86554194
Il27ra	ENSMUSG00000005465	8	86554186	86566488
Rln3	ENSMUSG00000045232	8	86566966	86568878
Gm10643	ENSMUSG00000074215	8	86587460	86589036
C330011M18Rik	ENSMUSG00000056753	8	86589135	86591186
Rfx1	ENSMUSG00000031706	8	86590735	86620891
Dcaf15	ENSMUSG00000037103	8	86620971	86628661
Podnl1	ENSMUSG00000012889	8	86649888	86656426
Cc2d1a	ENSMUSG00000036686	8	86656727	86671835
4930432K21Rik	ENSMUSG00000008129	8	86671924	86696489
Nanos3	ENSMUSG00000056155	8	86697632	86700451
Zswim4	ENSMUSG00000035671	8	86734577	86760954
D8Ertd738e	ENSMUSG00000019362	8	86770136	86773660
Mri1	ENSMUSG00000004996	8	86773805	86781225
Ccdc130	ENSMUSG00000004994	8	86781694	86794279
Cacna1a	ENSMUSG00000034656	8	86912339	87164145
Ier2	ENSMUSG00000053560	8	87185230	87186751
Nacc1	ENSMUSG00000001910	8	87194382	87211761
Trmt1	ENSMUSG00000001909	8	87210206	87223707
Nfix	ENSMUSG00000001911	8	87223775	87324243
Lyl1	ENSMUSG00000034041	8	87225356	87228614
G430095P16Rik	ENSMUSG00000074203	8	87246906	87250743
Dand5	ENSMUSG00000053226	8	87339304	87356140
Gadd45gip1	ENSMUSG00000033751	8	87355421	87359381
Rad23a	ENSMUSG00000003813	8	87357918	87364564
Calr	ENSMUSG00000003814	8	87365749	87370833
Farsa	ENSMUSG00000003808	8	87380888	87393156
Syce2	ENSMUSG00000003824	8	87396010	87412120
Gcdh	ENSMUSG00000003809	8	87410292	87417820
Klf1	ENSMUSG00000054191	8	87425827	87429194
Dnase2a	ENSMUSG00000003812	8	87432459	87446814
Mast1	ENSMUSG00000053693	8	87435802	87461258
Rtbdn	ENSMUSG00000048617	8	87470890	87480502
Rnaseh2a	ENSMUSG00000052926	8	87480509	87493666
Prdx2	ENSMUSG00000005161	8	87493486	87498733
Junb	ENSMUSG00000052837	8	87500811	87502617
Hook2	ENSMUSG00000052566	8	87514494	87527263
Best2	ENSMUSG00000052819	8	87531101	87538307
Asna1	ENSMUSG00000052456	8	87541833	87549177
2310036O22Rik	ENSMUSG00000041203	8	87550732	87554184
Tnpo2	ENSMUSG00000031691	8	87560814	87581482
Fbxw9	ENSMUSG00000008167	8	87583954	87591023
Dhps	ENSMUSG00000060038	8	87595656	87599061
Wdr83	ENSMUSG00000005150	8	87598934	87605205
BC056474	ENSMUSG00000059355	8	87604639	87606238
Man2b1	ENSMUSG00000005142	8	87607168	87622638
Zfp791	ENSMUSG00000074194	8	87633546	87643536
Gm6531	ENSMUSG00000062687	8	87695221	87697521
Olfr371	ENSMUSG00000051952	8	87754396	87755334
Vps35	ENSMUSG00000031696	8	87784296	87823412
Orc6	ENSMUSG00000031697	8	87823531	87832177
Mylk3	ENSMUSG00000031698	8	87848202	87910244
Gm16994	ENSMUSG00000087392	8	86410978	86423400
Gm2529	ENSMUSG00000073822	8	87189027	87193305
Gm15660	ENSMUSG00000082136	8	85876455	85876932
Gm16183	ENSMUSG00000086067	8	87135101	87141083
1700122E12Rik	ENSMUSG00000087685	8	87371087	87372314
A230103J11Rik	ENSMUSG00000087026	8	87577059	87584359
Mir709	ENSMUSG00000076144	8	86609998	86610085
7SK	ENSMUSG00000084682	8	86276817	86277103
Mir181c	ENSMUSG00000065483	8	86702762	86702867
Mir1199	ENSMUSG00000080665	8	86535414	86535532
Mir24-2	ENSMUSG00000065541	8	86732714	86732820
AC159266.1	ENSMUSG00000080334	8	86680656	86680776
SNORA9	ENSMUSG00000064392	8	86904348	86904480
AC163703.1	ENSMUSG00000089213	8	87635911	87635967
Mir27a	ENSMUSG00000065444	8	86732571	86732657
SNORD41	ENSMUSG00000077527	8	87574106	87574175
Mir23a	ENSMUSG00000065611	8	86732417	86732491
AC161765.1	ENSMUSG00000092826	8	87449424	87449532
Mir181d	ENSMUSG00000076338	8	86702615	86702686
U6	ENSMUSG00000088344	8	87839039	87839145
AA672651	ENSMUSG00000084895	8	87863242	87864171
Tox3	ENSMUSG00000043668	8	92770939	92872242
Chd9	ENSMUSG00000056608	8	93352734	93578407
Gm6658	ENSMUSG00000074171	8	93431838	93432314
Rbl2	ENSMUSG00000031666	8	93593956	93647743
Aktip	ENSMUSG00000031667	8	93635940	93658364
Rpgrip1l	ENSMUSG00000033282	8	93740929	93837161
Fto	ENSMUSG00000055932	8	93837431	94192338
SNORA17	ENSMUSG00000089179	8	93585164	93585295
7SK	ENSMUSG00000089148	8	93708818	93709082
U6	ENSMUSG00000064758	8	92113334	92113440
SNORA17	ENSMUSG00000088883	8	92191072	92191203
Irx3	ENSMUSG00000031734	8	94322424	94325966
Gm3235	ENSMUSG00000090778	8	94145347	94153628
D230002A01Rik	ENSMUSG00000046413	8	94324314	94331438
U6	ENSMUSG00000065636	8	94563816	94563919
4933436C20Rik	ENSMUSG00000031736	8	94849937	94880019
Irx5	ENSMUSG00000031737	8	94881695	94885353
Irx6	ENSMUSG00000031738	8	95198188	95204855
Gm3272	ENSMUSG00000078967	8	95239646	95240874
Gm17310	ENSMUSG00000091112	8	95343904	95344046
Mmp2	ENSMUSG00000031740	8	95351227	95377316
Lpcat2	ENSMUSG00000033192	8	95379249	95443178
Capns2	ENSMUSG00000078144	8	95425306	95426306
Slc6a2	ENSMUSG00000055368	8	95483978	95525566
Ces1a	ENSMUSG00000071047	8	95544113	95572091
Ces1b	ENSMUSG00000078964	8	95580626	95603916
Ces1c	ENSMUSG00000057400	8	95622914	95655182
Ces1d	ENSMUSG00000056973	8	95689967	95721737
Ces1e	ENSMUSG00000061959	8	95725117	95753518
AC121604.1	ENSMUSG00000080613	8	95437031	95437088
Ces1f	ENSMUSG00000031725	8	95780135	95803646
Ces1g	ENSMUSG00000057074	8	95826268	95861207
Ces1h	ENSMUSG00000074156	8	95875741	95903624
Ces5a	ENSMUSG00000058346	8	96008588	96015891
Ces5a	ENSMUSG00000058019	8	96037840	96059607
Gm16615	ENSMUSG00000085210	8	96274047	96334192
Gnao1	ENSMUSG00000031748	8	96333866	96493288
Amfr	ENSMUSG00000031751	8	96495488	96536563
Nudt21	ENSMUSG00000031754	8	96543303	96560939
Ogfod1	ENSMUSG00000033009	8	96561098	96591821
Bbs2	ENSMUSG00000031755	8	96591854	96622711
Mt4	ENSMUSG00000031757	8	96661104	96662931
Mt3	ENSMUSG00000031760	8	96676507	96678048
Mt2	ENSMUSG00000031762	8	96696518	96697467
Mt1	ENSMUSG00000031765	8	96702989	96704225
Nup93	ENSMUSG00000032939	8	96738497	96838966
Slc12a3	ENSMUSG00000031766	8	96853092	96890113
Herpud1	ENSMUSG00000031770	8	96910338	96919277
Ap3s1-ps2	ENSMUSG00000074154	8	96929008	96930286
Cpne2	ENSMUSG00000034361	8	97056890	97094429
Fam192a	ENSMUSG00000031774	8	97098843	97125626
Rspry1	ENSMUSG00000050079	8	97125855	97184175
Arl2bp	ENSMUSG00000031776	8	97190550	97198327
Pllp	ENSMUSG00000031775	8	97198795	97220142
Ccl22	ENSMUSG00000031779	8	97269490	97275599
Cx3cl1	ENSMUSG00000031778	8	97295909	97306323
Ccl17	ENSMUSG00000031780	8	97334353	97335935
Ciapin1	ENSMUSG00000031781	8	97343718	97362258
Coq9	ENSMUSG00000031782	8	97362221	97378795
Polr2c	ENSMUSG00000031783	8	97381350	97397435
Dok4	ENSMUSG00000040631	8	97387728	97400212
Ccdc102a	ENSMUSG00000063605	8	97426769	97441998
Gpr114	ENSMUSG00000061577	8	97447594	97467190
Gpr56	ENSMUSG00000031785	8	97508503	97538090
Gpr97	ENSMUSG00000060470	8	97541592	97569147
Ccdc135	ENSMUSG00000031786	8	97579003	97602041
Katnb1	ENSMUSG00000031787	8	97605101	97623774
Kifc3	ENSMUSG00000031788	8	97623732	97666440
Cngb1	ENSMUSG00000031789	8	97762945	97808081
BC016201	ENSMUSG00000058253	8	97814493	97830485
Tepp	ENSMUSG00000090206	8	97834466	97850223
Zfp319	ENSMUSG00000074140	8	97846914	97849163
Zfp319	ENSMUSG00000046556	8	97850037	97855850
AA960436	ENSMUSG00000031792	8	97856192	97871407
Mmp15	ENSMUSG00000031790	8	97876168	97898193
Gtl3	ENSMUSG00000031796	8	97944152	97958769
Csnk2a2	ENSMUSG00000046707	8	97969996	98012727
Ccdc113	ENSMUSG00000036598	8	98058000	98082788
Prss54	ENSMUSG00000048400	8	98083033	98099355
Gins3	ENSMUSG00000031669	8	98157459	98168959
Ndrg4	ENSMUSG00000036564	8	98200880	98239019
Setd6	ENSMUSG00000031671	8	98239815	98242910
Cnot1	ENSMUSG00000036550	8	98243351	98331366
Gm10094	ENSMUSG00000061104	8	98349254	98350033
Slc38a7	ENSMUSG00000036534	8	98359820	98377439
Got2	ENSMUSG00000031672	8	98388034	98412447
9330175E14Rik	ENSMUSG00000074153	8	96946799	96959005
Gm7418	ENSMUSG00000090188	8	97359617	97360417
Gm10286	ENSMUSG00000070111	8	97488579	97493656
Gm5912	ENSMUSG00000081436	8	98101371	98102808
4930513N10Rik	ENSMUSG00000074136	8	98330730	98345628
Gm15889	ENSMUSG00000089712	8	96901821	96903522
Gm15890	ENSMUSG00000090105	8	96903137	96910872
Nlrc5	ENSMUSG00000074151	8	96996663	97051172
SNORA46	ENSMUSG00000065089	8	98269960	98270095
7SK	ENSMUSG00000088331	8	97221916	97222185
SNORA76	ENSMUSG00000065211	8	98280850	98280984
Mir138-2	ENSMUSG00000065512	8	96848211	96848281
SNORA7	ENSMUSG00000087705	8	97523005	97523118
Mir1186b	ENSMUSG00000093084	8	98487444	98487507
SNORA17	ENSMUSG00000077272	8	98842387	98842518
1700047G07Rik	ENSMUSG00000053206	8	99036240	99037431
Gm5913	ENSMUSG00000081111	8	99951130	99953079
AC128668.1	ENSMUSG00000077938	8	99180029	99180119
U6	ENSMUSG00000089539	8	99746434	99746535
AC164603.1	ENSMUSG00000077125	8	99779741	99779850
U6atac	ENSMUSG00000080480	8	101198977	101199102
Wwox	ENSMUSG00000004637	8	116963555	117876608
Maf	ENSMUSG00000055435	8	118206842	118231694
Dynlrb2	ENSMUSG00000034467	8	119028915	119039796
Cdyl2	ENSMUSG00000031758	8	119098301	119256891
Gm15655	ENSMUSG00000086717	8	118228978	118231133
Gm10620	ENSMUSG00000074072	8	119288044	119289379
U7	ENSMUSG00000087787	8	118912950	118913013
U6	ENSMUSG00000065090	8	118115070	118115173
5S_rRNA	ENSMUSG00000088428	8	117576714	117576813
2310061C15Rik	ENSMUSG00000014633	8	119412585	119445355
Cenpn	ENSMUSG00000031756	8	119445640	119465403
Atmin	ENSMUSG00000047388	8	119467293	119484345
1700030J22Rik	ENSMUSG00000031847	8	119493499	119502843
Gcsh	ENSMUSG00000034424	8	119505710	119517437
Pkd1l2	ENSMUSG00000034416	8	119519579	119606349
Gm15395	ENSMUSG00000085688	8	119560397	119567539
Bcmo1	ENSMUSG00000031845	8	119619754	119657620
Gan	ENSMUSG00000052557	8	119682035	119729734
RP23-230G11.1	ENSMUSG00000093446	8	119649235	119649638
4933407C03Rik	ENSMUSG00000034390	8	119780919	119985403
Plcg2	ENSMUSG00000034330	8	120022191	120159040
Sdr42e1	ENSMUSG00000034308	8	120185299	120197589
Hsd17b2	ENSMUSG00000031844	8	120225846	120282929
Dbndd1	ENSMUSG00000031970	8	126028618	126039363
Gas8	ENSMUSG00000040220	8	126042839	126060422
Rhou	ENSMUSG00000039960	8	126177829	126187784
Rab4a	ENSMUSG00000019478	8	126329885	126359187
1700054N08Rik	ENSMUSG00000031971	8	126364731	126384109
Acta1	ENSMUSG00000031972	8	126415669	126418651
Nup133	ENSMUSG00000039509	8	126421023	126473165
Abcb10	ENSMUSG00000031974	8	126476359	126507022
Il17c	ENSMUSG00000046108	8	124945920	124947539
Cyba	ENSMUSG00000006519	8	124948672	124956840
Mvd	ENSMUSG00000006517	8	124957496	124967322
Snai3	ENSMUSG00000006587	8	124978106	124984592
Rnf166	ENSMUSG00000014470	8	124990047	124999964
Ctu2	ENSMUSG00000049482	8	125000043	125008038
Fam38a	ENSMUSG00000014444	8	125005598	125075229
Cdt1	ENSMUSG00000006585	8	125091915	125097028
Aprt	ENSMUSG00000006589	8	125098537	125100807
Galns	ENSMUSG00000015027	8	125102138	125135304
Trappc2l	ENSMUSG00000015013	8	125135526	125139488
Pabpn1l	ENSMUSG00000069867	8	125143371	125146639
Cbfa2t3	ENSMUSG00000006362	8	125152639	125223009
Acsf3	ENSMUSG00000015016	8	125299405	125341780
Gm16378	ENSMUSG00000074046	8	125365478	125366173
Cdh15	ENSMUSG00000031962	8	125371866	125391297
Ankrd11	ENSMUSG00000035569	8	125407221	125565897
Spg7	ENSMUSG00000000738	8	125586842	125621660
Rpl13	ENSMUSG00000000740	8	125626250	125629144
Cpne7	ENSMUSG00000034796	8	125641274	125659082
Sult5a1	ENSMUSG00000000739	8	125666747	125682215
Dpep1	ENSMUSG00000019278	8	125710135	125725710
Chmp1a	ENSMUSG00000000743	8	125728164	125736663
4732415M23Rik	ENSMUSG00000048478	8	125736758	125745945
Cdk10	ENSMUSG00000033862	8	125748741	125756150
Spata2l	ENSMUSG00000033594	8	125754423	125760109
1300018I17Rik	ENSMUSG00000001062	8	125766256	125778248
Zfp276	ENSMUSG00000001065	8	125778095	125793645
Fanca	ENSMUSG00000032815	8	125792200	125842476
Spire2	ENSMUSG00000010154	8	125856613	125893415
Taf5l	ENSMUSG00000038697	8	126520218	126545209
Urb2	ENSMUSG00000031976	8	126545408	126572405
Galnt2	ENSMUSG00000089704	8	126755291	126869624
Zfpm1	ENSMUSG00000049577	8	124806041	124861151
Trhr2	ENSMUSG00000039079	8	124880867	124884646
Zc3h18	ENSMUSG00000017478	8	124900509	124941260
Gm20388	ENSMUSG00000092329	8	122434741	126869622
4933417D19Rik	ENSMUSG00000084977	8	125758991	125766259
4732419C18Rik	ENSMUSG00000085789	8	126268531	126278128
RP23-354I24.3	ENSMUSG00000093682	8	124897937	124900344
9330133O14Rik	ENSMUSG00000044794	8	124967556	124969547
Gm15899	ENSMUSG00000085917	8	125207502	125207739
Gm10612	ENSMUSG00000090174	8	125221760	125224060
Gm10279	ENSMUSG00000069862	8	125730468	125730936
2810455O05Rik	ENSMUSG00000085030	8	126362453	126364685
Gm4342	ENSMUSG00000083911	8	126377729	126378095
Gm9901	ENSMUSG00000053244	8	126383562	126384564
1810008B01Rik	ENSMUSG00000089745	8	126829032	126830407
Tcf25	ENSMUSG00000001472	8	125897724	125928073
Mc1r	ENSMUSG00000074037	8	125930982	125934642
Tubb3	ENSMUSG00000062380	8	125935324	125945915
Def8	ENSMUSG00000001482	8	125966886	125987170
Afg3l1	ENSMUSG00000031967	8	126001803	126027816
n-R5s125	ENSMUSG00000075865	8	126105055	126105173
n-R5s100	ENSMUSG00000075799	8	126062686	126062804
[truncated: 2,197 more rows]

## Sheet: wk14IgG1-PT
Gene Name	Ensembl Gene ID	Chromosome	Start	End
Kcnb2	ENSMUSG00000092083	1	15277340	15704376
Kcnb2	ENSMUSG00000090498	1	15702384	15706448
Terf1	ENSMUSG00000025925	1	15795739	15833551
Gm106	ENSMUSG00000032719	1	15843943	15882803
4930444P10Rik	ENSMUSG00000067795	1	16056060	16083406
Rpl7	ENSMUSG00000043716	1	16091376	16094743
Rdh10	ENSMUSG00000025921	1	16095855	16123815
Stau2	ENSMUSG00000025920	1	16218755	16510193
Ube2w	ENSMUSG00000025939	1	16559863	16609570
Tceb1	ENSMUSG00000079658	1	16632847	16646946
Tmem70	ENSMUSG00000025940	1	16655288	16668356
Ly96	ENSMUSG00000025779	1	16678537	16699686
Jph1	ENSMUSG00000042686	1	16987545	17087879
Gdap1	ENSMUSG00000025777	1	17135443	17154352
Gm7568	ENSMUSG00000089982	1	16243673	16258002
Gm5828	ENSMUSG00000091020	1	16757095	16760241
Gm16720	ENSMUSG00000087414	1	16647633	16652359
SNORA17	ENSMUSG00000077377	1	15747913	15748044
SNORA17	ENSMUSG00000088829	1	15676016	15676127
7SK	ENSMUSG00000088943	1	15869611	15869913
Arhgef4	ENSMUSG00000037509	1	34778769	34870154
Fam168b	ENSMUSG00000037503	1	34870064	34899910
Plekhb2	ENSMUSG00000026123	1	34906804	34936425
Hs6st1	ENSMUSG00000045216	1	36125245	36163291
Uggt1	ENSMUSG00000037470	1	36198375	36301150
Neurl3	ENSMUSG00000047180	1	36321447	36330270
Arid5a	ENSMUSG00000037447	1	36364578	36380874
4632411B12Rik	ENSMUSG00000010453	1	36392575	36426026
Lman2l	ENSMUSG00000001143	1	36478910	36502116
Cnnm4	ENSMUSG00000037408	1	36528442	36565621
Cnnm3	ENSMUSG00000001138	1	36568712	36585082
Ankrd23	ENSMUSG00000067653	1	36587379	36592584
Ankrd39	ENSMUSG00000079610	1	36595018	36604046
Sema4c	ENSMUSG00000026121	1	36605487	36615194
Fam178b	ENSMUSG00000046337	1	36619539	36740028
C230030N03Rik	ENSMUSG00000089955	1	34735033	34781146
C230030N03Rik	ENSMUSG00000046858	1	34779929	34780877
Fer1l5	ENSMUSG00000037432	1	36473733	36478955
D430040D24Rik	ENSMUSG00000087589	1	36615204	36622458
Gm6428	ENSMUSG00000089906	1	36658647	36658991
SNORA17	ENSMUSG00000077231	1	35235801	35235929
U6	ENSMUSG00000064601	1	35818447	35818551
Cox5b	ENSMUSG00000061518	1	36748332	36750230
Actr1b	ENSMUSG00000037351	1	36756047	36771267
Zap70	ENSMUSG00000026117	1	36818695	36839663
Tmem131	ENSMUSG00000026116	1	36849036	36996372
AC084389.1	ENSMUSG00000077939	1	36720810	36720884
Rpl12-ps1	ENSMUSG00000080054	1	37014738	37015362
Vwa3b	ENSMUSG00000050122	1	37083441	37133841
Vwa3b	ENSMUSG00000026115	1	37210689	37244450
n-R5s210	ENSMUSG00000070201	1	37062284	37062402
Cnga3	ENSMUSG00000026114	1	37275181	37320229
Inpp4a	ENSMUSG00000026113	1	37356710	37467581
6330578E17Rik	ENSMUSG00000026112	1	37473929	37486948
Unc50	ENSMUSG00000026111	1	37487015	37495969
Mgat4a	ENSMUSG00000026110	1	37496185	37597861
2010300C02Rik	ENSMUSG00000026090	1	37668522	37776930
Tsga10	ENSMUSG00000060771	1	37811417	37922143
Lipt1	ENSMUSG00000037216	1	37928583	37934232
Mitd1	ENSMUSG00000026088	1	37931646	37947256
Mrpl30	ENSMUSG00000026087	1	37947322	37955380
Lyg2	ENSMUSG00000061584	1	37962766	37973338
Lyg1	ENSMUSG00000026085	1	38003581	38014604
Txndc9	ENSMUSG00000058407	1	38040712	38054191
Eif5b	ENSMUSG00000026083	1	38054855	38112424
Rev1	ENSMUSG00000026082	1	38109632	38186507
Aff3	ENSMUSG00000037138	1	38234171	38721800
4930439A04Rik	ENSMUSG00000086064	1	37386512	37391017
4930594C11Rik	ENSMUSG00000087233	1	37544038	37545827
4930556I23Rik	ENSMUSG00000089767	1	37671104	37672217
Gm15457	ENSMUSG00000087374	1	37990441	38010981
Gm16150	ENSMUSG00000085391	1	38292265	38303511
Gm16151	ENSMUSG00000085280	1	38364747	38368775
Gm16152	ENSMUSG00000087131	1	38441794	38450819
Gm17715	ENSMUSG00000092106	1	37922144	37928233
7SK	ENSMUSG00000089141	1	38030812	38031048
Lonrf2	ENSMUSG00000048814	1	38850514	38892935
Chst10	ENSMUSG00000026080	1	38920722	38955005
Nms	ENSMUSG00000067604	1	38995994	39007123
Pdcl3	ENSMUSG00000026078	1	39044659	39054081
Npas2	ENSMUSG00000026077	1	39250576	39420079
Gm20428	ENSMUSG00000092553	1	39333128	39333410
Rpl31	ENSMUSG00000073702	1	39424696	39428753
Tbc1d8	ENSMUSG00000003134	1	39428344	39535592
D1Bwg0212e	ENSMUSG00000003135	1	39591837	39603726
Rnf149	ENSMUSG00000048234	1	39608141	39634250
Creg2	ENSMUSG00000050967	1	39675251	39708027
Rfx8	ENSMUSG00000057173	1	39722151	39777842
Gm3646	ENSMUSG00000091937	1	39861028	39861189
Map4k4	ENSMUSG00000026074	1	39957758	40083155
Il1r2	ENSMUSG00000026073	1	40141613	40182064
Il1r1	ENSMUSG00000026072	1	40281925	40373043
Gm3617	ENSMUSG00000092563	1	39371744	39372298
Gm15832	ENSMUSG00000085894	1	39604415	39608847
D930019O06Rik	ENSMUSG00000090677	1	39707021	39714235
Gm16894	ENSMUSG00000086705	1	40133073	40142698
SNORA33	ENSMUSG00000064936	1	39630591	39630720
Snord89	ENSMUSG00000077704	1	39605590	39605699
U3	ENSMUSG00000065629	1	39576378	39576591
Gm4776	ENSMUSG00000044457	1	46076917	46087314
Dnahc7b	ENSMUSG00000041144	1	46123583	46430395
Dnahc7c	ENSMUSG00000078595	1	46665806	46682956
Slc39a10	ENSMUSG00000025986	1	46864389	46910891
Gm4852	ENSMUSG00000081185	1	47422488	47423216
AC134426.1	ENSMUSG00000080510	1	47806123	47806243
7SK	ENSMUSG00000088017	1	47808143	47808412
n-R5s211	ENSMUSG00000070199	1	46431042	46431160
U1	ENSMUSG00000064943	1	48519017	48519137
Pikfyve	ENSMUSG00000025949	1	65233324	65320586
Pth2r	ENSMUSG00000025946	1	65328630	65435818
Idh1	ENSMUSG00000025950	1	65205190	65233053
4933402D24Rik	ENSMUSG00000025961	1	63801481	63815841
Klf7	ENSMUSG00000025959	1	64076021	64168856
Creb1	ENSMUSG00000025958	1	64579378	64651121
Mettl21a	ENSMUSG00000025956	1	64653047	64663816
Ccnyl1	ENSMUSG00000070871	1	64737029	64772218
Fzd5	ENSMUSG00000045005	1	64777134	64784324
Plekhm3	ENSMUSG00000051344	1	64832557	65003398
Akr1cl	ENSMUSG00000025955	1	65059263	65079333
Cryge	ENSMUSG00000070870	1	65095128	65097723
Crygd	ENSMUSG00000067299	1	65108446	65110026
Crygc	ENSMUSG00000025952	1	65118099	65120263
Crygb	ENSMUSG00000073658	1	65126804	65128862
Cryga	ENSMUSG00000044429	1	65146963	65149947
D630023F18Rik	ENSMUSG00000044816	1	65147193	65169788
Gm13751	ENSMUSG00000080817	1	63891401	63892152
Gm13754	ENSMUSG00000082373	1	63964422	63982506
Gm13749	ENSMUSG00000044689	1	64011301	64015573
Gm13748	ENSMUSG00000086836	1	64125228	64137356
Gm13750	ENSMUSG00000086721	1	64196775	64197239
2810408I11Rik	ENSMUSG00000087213	1	64726445	64737233
Rpl10a-ps1	ENSMUSG00000084416	1	65040498	65041205
Gm8550	ENSMUSG00000090042	1	65074654	65075306
Gm5255	ENSMUSG00000082565	1	65597038	65597811
Gm8805	ENSMUSG00000082774	1	65599256	65599568
Gm17427	ENSMUSG00000090886	1	64076037	64079501
AC167197.1	ENSMUSG00000093228	1	64442908	64442977
U1	ENSMUSG00000077471	1	65047881	65048036
Crygf	ENSMUSG00000025945	1	65973096	65974881
Gm8809	ENSMUSG00000081623	1	66078757	66079499
Gm15659	ENSMUSG00000083242	1	66079659	66079999
Gm8812	ENSMUSG00000083289	1	66109539	66109950
Mtap2	ENSMUSG00000015222	1	66221847	66489157
Gm10558	ENSMUSG00000073656	1	66368850	66375370
SNORA26	ENSMUSG00000088850	1	66352463	66352599
Epha4	ENSMUSG00000026235	1	77363760	77511663
5S_rRNA	ENSMUSG00000089326	1	77141328	77141421
U1	ENSMUSG00000065215	1	77894858	77895021
Pax3	ENSMUSG00000004872	1	78097842	78193709
Sgpp2	ENSMUSG00000032908	1	78306921	78416861
Farsb	ENSMUSG00000026245	1	78414533	78485434
BC035947	ENSMUSG00000090486	1	78494381	78508538
Mogat1	ENSMUSG00000012187	1	78507566	78534748
Acsl3	ENSMUSG00000032883	1	78654400	78703562
Utp14b	ENSMUSG00000079470	1	78654613	78664163
Kcne4	ENSMUSG00000047330	1	78813502	78816599
Gm5830	ENSMUSG00000072978	1	78964212	78964654
Scg2	ENSMUSG00000050711	1	79431244	79436665
Ap1s3	ENSMUSG00000054702	1	79603451	79668547
SNORA17	ENSMUSG00000077782	1	79510314	79510439
Stk25	ENSMUSG00000026277	1	95518479	95532299
Bok	ENSMUSG00000026278	1	95582271	95592339
Thap4	ENSMUSG00000026279	1	95601968	95651415
Atg4b	ENSMUSG00000026280	1	95648077	95686372
Dtymk	ENSMUSG00000026281	1	95689153	95698511
Ing5	ENSMUSG00000026283	1	95700542	95718678
D2hgdh	ENSMUSG00000073609	1	95721817	95748925
Gal3st2	ENSMUSG00000034005	1	95757921	95773071
Gm9994	ENSMUSG00000056307	1	95824364	95839221
Gm7889	ENSMUSG00000091067	1	95879623	95882396
Gm6086	ENSMUSG00000073608	1	95887086	95908118
Neu4	ENSMUSG00000034000	1	95917070	95924903
Pdcd1	ENSMUSG00000026285	1	95934884	95949130
Gm17386	ENSMUSG00000091447	1	96048774	96049705
Fam174a	ENSMUSG00000051185	1	97210205	97231861
St8sia4	ENSMUSG00000040710	1	97484261	97564171
Gm15427	ENSMUSG00000081051	1	97395142	97395805
U7	ENSMUSG00000088333	1	97462119	97462181
U6	ENSMUSG00000088961	1	95705147	95705248
SNORD30	ENSMUSG00000077413	1	96512213	96512281
AC131316.1	ENSMUSG00000093284	1	95549077	95549367
SNORA17	ENSMUSG00000089310	1	96936511	96936620
U6	ENSMUSG00000065342	1	97728706	97728812
AC102463.2	ENSMUSG00000077860	1	98163428	98163518
AC102463.1	ENSMUSG00000077014	1	98199723	98199832
U6	ENSMUSG00000064461	1	98513676	98513782
SNORA17	ENSMUSG00000077255	1	98658608	98658735
Slco4c1	ENSMUSG00000040693	1	98715361	98768748
Slco6b1	ENSMUSG00000045463	1	98808389	98894154
Slco6b1	ENSMUSG00000090974	1	98802753	98894154
Gm6430	ENSMUSG00000044757	1	98921090	98923123
Gm5101	ENSMUSG00000092052	1	98768798	98777807
Slco6c1	ENSMUSG00000026331	1	98955615	99024830
Tsn	ENSMUSG00000026374	1	120195094	120207709
Mki67ip	ENSMUSG00000026377	1	120218416	120230399
Clasp1	ENSMUSG00000064302	1	120285635	120506009
2900060B14Rik	ENSMUSG00000073596	1	120355247	120355324
Gm11102	ENSMUSG00000079361	1	120373603	120373998
Tfcp2l1	ENSMUSG00000026380	1	120524522	120581744
Gli2	ENSMUSG00000048402	1	120730709	120950196
Inhbb	ENSMUSG00000037035	1	121312042	121318825
Ralb	ENSMUSG00000004451	1	121366882	121401371
Epb4.1l5	ENSMUSG00000026383	1	121441610	121545577
Ptpn4	ENSMUSG00000026384	1	121554621	121734190
Tmem177	ENSMUSG00000036975	1	121804467	121809785
Gm101	ENSMUSG00000036962	1	121819918	121893811
Tmem185b	ENSMUSG00000037015	1	121423002	121424801
Gm3851	ENSMUSG00000091876	1	121684346	121684663
Gm8338	ENSMUSG00000090277	1	121714340	121714702
SNORA17	ENSMUSG00000077257	1	120349932	120350062
U4atac	ENSMUSG00000080542	1	120355718	120355842
5S_rRNA	ENSMUSG00000089601	1	120534865	120534981
U1	ENSMUSG00000088363	1	120578398	120578527
U6	ENSMUSG00000084505	1	121426788	121426891
Smyd3	ENSMUSG00000055067	1	180882091	181448172
Gm5561	ENSMUSG00000075392	1	181450388	181451039
Tfb2m	ENSMUSG00000026492	1	181458186	181476398
Cnst	ENSMUSG00000038949	1	181476501	181557609
Sccpdh	ENSMUSG00000038936	1	181598341	181617320
Gm1305	ENSMUSG00000087236	1	181625428	181675316
Ahctf1	ENSMUSG00000026491	1	181675025	181733811
Gm10518	ENSMUSG00000073486	1	181733507	181734807
Cdc42bpa	ENSMUSG00000026490	1	181890603	182095734
Adck3	ENSMUSG00000026489	1	182095369	182129733
Psen2	ENSMUSG00000010609	1	182157135	182193569
Gm5069	ENSMUSG00000055676	1	182257102	182260681
Itpkb	ENSMUSG00000038855	1	182260607	182354933
6330403A02Rik	ENSMUSG00000053963	1	182362518	182413598
Parp1	ENSMUSG00000026496	1	182499086	182531384
Lin9	ENSMUSG00000058729	1	182571498	182620816
Mixl1	ENSMUSG00000026497	1	182623174	182627165
Acbd3	ENSMUSG00000026499	1	182656174	182684334
H3f3a	ENSMUSG00000060743	1	182730963	182744074
BC031781	ENSMUSG00000038806	1	182781282	182798228
Lefty2	ENSMUSG00000066652	1	182823239	182829234
Pycr2	ENSMUSG00000026520	1	182834405	182838218
Lefty1	ENSMUSG00000038793	1	182865153	182868531
Tmem63a	ENSMUSG00000026519	1	182872475	182905243
Ephx1	ENSMUSG00000038776	1	182906286	182951035
9130409I23Rik	ENSMUSG00000038768	1	182981368	182990798
Nvl	ENSMUSG00000026516	1	183023554	183074288
Cnih4	ENSMUSG00000062169	1	183081062	183099125
Wdr26	ENSMUSG00000038733	1	183103359	183142109
A430110L20Rik	ENSMUSG00000054135	1	183156207	183158621
Cnih3	ENSMUSG00000026514	1	183282759	183390772
Gm17275	ENSMUSG00000090986	1	182732699	182739614
2210411M09Rik	ENSMUSG00000085563	1	182882195	182888280
Rpl35a-ps2	ENSMUSG00000081214	1	183172076	183172498
Gm15480	ENSMUSG00000082395	1	181468548	181469066
Gm16067	ENSMUSG00000073485	1	182743907	182746990
Gm16547	ENSMUSG00000089888	1	183330595	183330887
U6	ENSMUSG00000084558	1	182762900	182763007
AC167020.1	ENSMUSG00000092967	1	182663926	182664013
Gm16539	ENSMUSG00000089927	1	183361854	183362531
Ccdc121	ENSMUSG00000050625	1	183439764	183441582
Dnahc14	ENSMUSG00000047369	1	183669119	183699805
Lbr	ENSMUSG00000004880	1	183745447	183772532
Gm5533	ENSMUSG00000056699	1	183781739	183783320
U6	ENSMUSG00000064970	1	183743738	183743831
5S_rRNA	ENSMUSG00000089429	1	183770584	183770699
Enah	ENSMUSG00000022995	1	183834576	183950111
Srp9	ENSMUSG00000026511	1	184054868	184062538
Vmn1r1	ENSMUSG00000091013	1	184087275	184088450
Degs1	ENSMUSG00000038633	1	184205903	184212935
Fbxo28	ENSMUSG00000047539	1	184243233	184271737
Gm10517	ENSMUSG00000073482	1	184338750	184339151
Trp53bp2	ENSMUSG00000026510	1	184339303	184392563
Capn2	ENSMUSG00000026509	1	184397391	184447655
Kcnk2	ENSMUSG00000037624	1	191031816	191167711
Cenpf	ENSMUSG00000026605	1	191464478	191511965
Ptpn14	ENSMUSG00000026604	1	191552147	191700574
Smyd2	ENSMUSG00000026603	1	191704371	191746242
Prox1	ENSMUSG00000010175	1	191941917	191994559
Rps6kc1	ENSMUSG00000089872	1	192524081	192735649
Angel2	ENSMUSG00000026634	1	192748991	192770841
Vash2	ENSMUSG00000037568	1	192771527	192803175
Mfsd7b	ENSMUSG00000066595	1	192829711	192850069
1700022P22Rik	ENSMUSG00000057072	1	192860701	192866821
Tatdn3	ENSMUSG00000026632	1	192869705	192886811
Nsl1	ENSMUSG00000062510	1	192886891	192908437
Batf3	ENSMUSG00000026630	1	192922293	192932822
Fam71a	ENSMUSG00000091017	1	192986463	192988696
Atf3	ENSMUSG00000026628	1	192994175	193007219
Gm17653	ENSMUSG00000090445	1	191657020	191660499
Gm17566	ENSMUSG00000079045	1	191994175	192041155
mmu-mir-1194	ENSMUSG00000080505	1	191217229	191217349
AC124613.1	ENSMUSG00000093064	1	192306751	192307036
7SK	ENSMUSG00000088461	1	193020785	193020892
Nenf	ENSMUSG00000037499	1	193130668	193142073
Tmem206	ENSMUSG00000026627	1	193149791	193174793
Ppp2r5a	ENSMUSG00000026626	1	193175860	193220920
Dtl	ENSMUSG00000037474	1	193361244	193399413
Ints7	ENSMUSG00000037461	1	193399642	193446551
Lpgat1	ENSMUSG00000026623	1	193541713	193608134
Nek2	ENSMUSG00000026622	1	193645323	193656929
1700034H15Rik	ENSMUSG00000055833	1	193714112	193731406
Slc30a1	ENSMUSG00000037434	1	193730646	193737126
Rd3	ENSMUSG00000049353	1	193801270	193810273
Traf5	ENSMUSG00000026637	1	193821311	193916440
Rcor3	ENSMUSG00000037395	1	193922652	193961892
Kcnh1	ENSMUSG00000058248	1	194014666	194334041
Hhat	ENSMUSG00000037375	1	194336710	194597413
Gm16621	ENSMUSG00000085764	1	193916253	193923511
Gm10516	ENSMUSG00000073476	1	193960780	193974895
D730003I15Rik	ENSMUSG00000073478	1	193048353	193049565
U6	ENSMUSG00000064845	1	193596600	193596713
U6	ENSMUSG00000065821	1	193586079	193586182
Mir3473c	ENSMUSG00000093003	1	193822435	193822515
A730013G03Rik	ENSMUSG00000047384	1	194659363	194660913
Sertad4	ENSMUSG00000016262	1	194670625	194681946
Syt14	ENSMUSG00000016200	1	194723404	194861911
Gm15867	ENSMUSG00000089812	1	194681122	194682660
U5	ENSMUSG00000064881	1	194571765	194571880
Sh2d3c	ENSMUSG00000059013	2	32576575	32611032
Ttc16	ENSMUSG00000039021	2	32612546	32631153
Tor2a	ENSMUSG00000009563	2	32612754	32617764
Gm13524	ENSMUSG00000085397	2	32701706	32703688
Gm13523	ENSMUSG00000087496	2	32729275	32731521
Gm13528	ENSMUSG00000085087	2	33033422	33037401
Gm13537	ENSMUSG00000082844	2	33178691	33178957
Gm13536	ENSMUSG00000085742	2	33302322	33304727
Gm13530	ENSMUSG00000086939	2	33345302	33359152
C130021I20Rik	ENSMUSG00000052951	2	33496713	33501869
Gm13529	ENSMUSG00000081244	2	33507909	33508318
9430024E24Rik	ENSMUSG00000085463	2	33571881	33574419
A630071L07Rik	ENSMUSG00000086484	2	33661336	33669111
Ptrh1	ENSMUSG00000053746	2	32631306	32645691
Gm13403	ENSMUSG00000085987	2	33791308	33797665
Gm13404	ENSMUSG00000086904	2	33833766	33835844
C230014O12Rik	ENSMUSG00000087461	2	33873809	33966964
C79798	ENSMUSG00000084908	2	34143291	34159960
Gm13407	ENSMUSG00000083503	2	34268508	34268867
Gm13406	ENSMUSG00000083233	2	34291847	34292102
Gm13408	ENSMUSG00000081992	2	34420519	34421316
Gm13414	ENSMUSG00000087635	2	34505032	34505760
1700019L03Rik	ENSMUSG00000038987	2	32632901	32639948
Stxbp1	ENSMUSG00000026797	2	32643122	32702759
Fam129b	ENSMUSG00000026796	2	32731634	32780774
Lrsam1	ENSMUSG00000026792	2	32780740	32817134
Rpl12	ENSMUSG00000038900	2	32817079	32820016
Slc2a8	ENSMUSG00000026791	2	32828510	32837603
Garnl3	ENSMUSG00000038860	2	32841886	32987174
Ralgps1	ENSMUSG00000038831	2	32988941	33227006
Angptl2	ENSMUSG00000004105	2	33071589	33103237
Zbtb34	ENSMUSG00000068966	2	33261628	33286844
Zbtb43	ENSMUSG00000026788	2	33305807	33324079
Lmx1b	ENSMUSG00000038765	2	33416485	33496031
Fam125b	ENSMUSG00000038740	2	33585473	33743466
Pbx3	ENSMUSG00000038718	2	34026977	34228660
Mapkap1	ENSMUSG00000038696	2	34262291	34480470
Gapvd1	ENSMUSG00000026867	2	34531704	34625210
SNORA48	ENSMUSG00000088836	2	33067325	33067461
Snora65	ENSMUSG00000065124	2	32818811	32818940
AL845277.1	ENSMUSG00000093138	2	33218514	33218566
SNORA31	ENSMUSG00000064652	2	32687509	32687636
NRON	ENSMUSG00000089596	2	33668477	33668846
Gm13461	ENSMUSG00000081999	2	41842685	41844369
Gm13463	ENSMUSG00000081085	2	41980141	41980373
Gm13464	ENSMUSG00000080994	2	43373986	43374918
Arhgap15	ENSMUSG00000049744	2	43604344	44251473
Kynu	ENSMUSG00000026866	2	43410849	43538235
Lrp1b	ENSMUSG00000049252	2	40450768	42509118
SNORA17	ENSMUSG00000077351	2	42664555	42664686
A430092G05Rik	ENSMUSG00000085089	2	43914758	43920844
U6	ENSMUSG00000088124	2	44284455	44284563
Gtdc1	ENSMUSG00000036890	2	44419932	44783177
Gm13477	ENSMUSG00000083849	2	44643785	44646471
Zeb2	ENSMUSG00000026872	2	44839154	44972915
Mir5129	ENSMUSG00000092679	2	44878620	44878697
Gm13476	ENSMUSG00000052248	2	44966658	44969607
Gm13475	ENSMUSG00000081830	2	45184752	45184985
Gm13470	ENSMUSG00000086644	2	46275055	46298230
Gm13468	ENSMUSG00000083756	2	47472605	47473049
Gm13481	ENSMUSG00000086353	2	47918068	48312765
Gm13471	ENSMUSG00000082278	2	47995666	47996098
Gm13482	ENSMUSG00000083966	2	48154428	48154681
Gm13472	ENSMUSG00000083866	2	48243557	48243870
SNORA17	ENSMUSG00000089144	2	46462487	46462603
U7	ENSMUSG00000088328	2	47027033	47027092
AL772185.1	ENSMUSG00000092853	2	47397504	47397605
U6atac	ENSMUSG00000080499	2	48239739	48239858
Gm13489	ENSMUSG00000082114	2	48665107	48666075
Mbd5	ENSMUSG00000036792	2	48805030	49177804
Orc4	ENSMUSG00000026761	2	48758344	48805797
Acvr2a	ENSMUSG00000052155	2	48669629	48758789
Prokr2	ENSMUSG00000050558	2	132163469	132211183
Rassf2	ENSMUSG00000027339	2	131815151	131855994
Prnd	ENSMUSG00000027338	2	131735693	131781866
1110034G24Rik	ENSMUSG00000044991	2	132512667	132576791
Chgb	ENSMUSG00000027350	2	132607014	132620815
Erv3	ENSMUSG00000037482	2	131679414	131685483
Prnp	ENSMUSG00000079037	2	131735664	131764165
5730494N06Rik	ENSMUSG00000027341	2	132065228	132073543
5330413P13Rik	ENSMUSG00000086822	2	131645742	131673396
Gm14282	ENSMUSG00000081422	2	131671092	131671331
Gm14281	ENSMUSG00000083469	2	131672131	131673424
Lamr1-ps1	ENSMUSG00000081229	2	131729822	131730695
Gm14052	ENSMUSG00000082990	2	131925605	131926635
Gm14051	ENSMUSG00000086756	2	131970269	132045986
AV099323	ENSMUSG00000087377	2	132079093	132087069
4921508D12Rik	ENSMUSG00000027345	2	132250477	132278235
Gm14095	ENSMUSG00000086250	2	132308948	132326884
1700026D11Rik	ENSMUSG00000086379	2	132316370	132349793
AU019990	ENSMUSG00000074783	2	132423931	132478804
Rpl23a-ps4	ENSMUSG00000081445	2	132487978	132488432
Gm14099	ENSMUSG00000084089	2	132499121	132499725
Gm14098	ENSMUSG00000081662	2	132504005	132504975
Gm14097	ENSMUSG00000084839	2	132520168	132524259
Gm14104	ENSMUSG00000086575	2	132671735	132672992
Gm14102	ENSMUSG00000086478	2	132784178	132785541
Gm14101	ENSMUSG00000084393	2	132805905	132806904
Gm14103	ENSMUSG00000082940	2	132872923	132873288
Gm14094	ENSMUSG00000083689	2	133025347	133025956
A430048G15Rik	ENSMUSG00000086650	2	133257831	133279098
Gm14100	ENSMUSG00000087585	2	133288854	133291520
Gpcpd1	ENSMUSG00000027346	2	132354818	132413465
Trmt6	ENSMUSG00000037376	2	132629943	132641791
Mcm8	ENSMUSG00000027353	2	132641877	132669933
Crls1	ENSMUSG00000027357	2	132672402	132692521
Lrrn4	ENSMUSG00000043110	2	132694041	132706627
Fermt1	ENSMUSG00000027356	2	132729915	132771772
Slc23a2	ENSMUSG00000027340	2	131878232	131970844
Bmp2	ENSMUSG00000027358	2	133377895	133388621
Pcna	ENSMUSG00000027342	2	132074898	132079050
Cds2	ENSMUSG00000058793	2	132088884	132137786
U1	ENSMUSG00000065050	2	132834223	132834390
U6	ENSMUSG00000064413	2	132542842	132542944
U6	ENSMUSG00000064983	2	133410051	133410157
Mir3090	ENSMUSG00000093338	2	133390444	133390530
Hao1	ENSMUSG00000027261	2	134323097	134380104
Tmx4	ENSMUSG00000034723	2	134419921	134469881
Gm14037	ENSMUSG00000081243	2	134556531	134556843
Gm14038	ENSMUSG00000083879	2	134587805	134589385
Gm14036	ENSMUSG00000082399	2	134629685	134630164
Plcb1	ENSMUSG00000051177	2	134611895	135300994
Plcb4	ENSMUSG00000039943	2	135484747	135840329
4930545L23Rik	ENSMUSG00000085247	2	134995309	135041352
9630028H03Rik	ENSMUSG00000085631	2	135151183	135409320
Gm14074	ENSMUSG00000084762	2	135474643	135477799
Gm14209	ENSMUSG00000085908	2	135495189	135496161
Gm14211	ENSMUSG00000085709	2	135511910	135518890
Gm14210	ENSMUSG00000086928	2	135637681	135638663
Tspyl3	ENSMUSG00000074671	2	153048116	153051177
Plagl2	ENSMUSG00000051413	2	153053495	153067162
Pofut1	ENSMUSG00000046020	2	153067269	153095983
Kif3b	ENSMUSG00000027475	2	153117149	153159126
Asxl1	ENSMUSG00000042548	2	153171581	153229743
8430427H17Rik	ENSMUSG00000061411	2	153233198	153355707
4930404H24Rik	ENSMUSG00000079001	2	153318526	153319577
Commd7	ENSMUSG00000056941	2	153442669	153458517
Dnmt3b	ENSMUSG00000027478	2	153475186	153513466
Mapre1	ENSMUSG00000027479	2	153567010	153599046
Efcab8	ENSMUSG00000044083	2	153606615	153670488
Sun5	ENSMUSG00000027480	2	153681924	153696820
Bpifb2	ENSMUSG00000027481	2	153700781	153721006
Bpifb6	ENSMUSG00000068009	2	153726124	153738531
Bpifb3	ENSMUSG00000068008	2	153743966	153758732
Bpifb4	ENSMUSG00000074665	2	153763948	153789837
Bpifa6	ENSMUSG00000078998	2	153800681	153826231
Bpifa2	ENSMUSG00000042459	2	153834001	153841815
Bpifa3	ENSMUSG00000027482	2	153956072	153964092
Bpifa1	ENSMUSG00000027483	2	153968616	153974955
Bpifa5	ENSMUSG00000027484	2	153988343	153994186
Bpifb1	ENSMUSG00000027485	2	154016554	154046105
Bpifb5	ENSMUSG00000038572	2	154049478	154066638
Bpifb9a	ENSMUSG00000067998	2	154083590	154096981
Bpifb9b	ENSMUSG00000067996	2	154132963	154146382
Cdk5rap1	ENSMUSG00000027487	2	154161116	154198746
Snta1	ENSMUSG00000027488	2	154202049	154233835
Cbfa2t2	ENSMUSG00000038533	2	154262217	154365092
Necab3	ENSMUSG00000027489	2	154370135	154384626
1700003F12Rik	ENSMUSG00000038523	2	154372821	154375739
1700007I08Rik	ENSMUSG00000078129	2	154377512	154379012
E2f1	ENSMUSG00000027490	2	154385143	154395628
Pxmp4	ENSMUSG00000000876	2	154411494	154429444
Zfp341	ENSMUSG00000059842	2	154439033	154472557
Chmp4b	ENSMUSG00000038467	2	154477441	154520521
Raly	ENSMUSG00000027593	2	154616832	154692997
a	ENSMUSG00000027596	2	154617138	154876748
Eif2s2	ENSMUSG00000074656	2	154697146	154718671
Gm14226	ENSMUSG00000084897	2	154844002	154852840
Ahcy	ENSMUSG00000027597	2	154885046	154900233
Itch	ENSMUSG00000027598	2	154959245	155052591
2500004C02Rik	ENSMUSG00000073236	2	153166893	153171809
Gm14472	ENSMUSG00000082283	2	153239585	153239866
7530422B04Rik	ENSMUSG00000079000	2	153474426	153476022
Gm14490	ENSMUSG00000082079	2	153522388	153555641
Gm14494	ENSMUSG00000083097	2	153651789	153652570
Gm14497	ENSMUSG00000081013	2	153912571	153913150
Gm14197	ENSMUSG00000083732	2	154109949	154110997
Gm14198	ENSMUSG00000085483	2	154455738	154458372
Gm14217	ENSMUSG00000082064	2	154529545	154530435
Gm14215	ENSMUSG00000083975	2	154539238	154539458
Gm14216	ENSMUSG00000085691	2	154548088	154564187
Gm14214	ENSMUSG00000082493	2	154594991	154595766
2310005A03Rik	ENSMUSG00000087254	2	154923525	154925817
Gm14227	ENSMUSG00000082596	2	155024368	155024996
Dynlrb1	ENSMUSG00000047459	2	155062269	155076013
Pigu	ENSMUSG00000038383	2	155072732	155183166
Srsf6	ENSMUSG00000016921	2	162757264	162762857
L3mbtl1	ENSMUSG00000035576	2	162769201	162800258
Sgk2	ENSMUSG00000017868	2	162813066	162839863
Ift52	ENSMUSG00000017858	2	162843090	162871877
Mybl2	ENSMUSG00000017861	2	162880423	162910424
Gtsf1l	ENSMUSG00000070708	2	162912767	162913590
Tox2	ENSMUSG00000074607	2	163028861	163149906
Jph2	ENSMUSG00000017817	2	163161978	163223729
3230401D17Rik	ENSMUSG00000035399	2	163231558	163250433
Gdap1l1	ENSMUSG00000017943	2	163264212	163281060
Fitm2	ENSMUSG00000048486	2	163292115	163298365
2310001K24Rik	ENSMUSG00000053353	2	163298327	163298647
R3hdml	ENSMUSG00000078949	2	163318054	163328348
Hnf4a	ENSMUSG00000017950	2	163332544	163398646
Ttpal	ENSMUSG00000017679	2	163428050	163444749
Serinc3	ENSMUSG00000017707	2	163449008	163470867
0610039K10Rik	ENSMUSG00000058812	2	163470586	163471536
Pkig	ENSMUSG00000035268	2	163484122	163551894
Ada	ENSMUSG00000017697	2	163552320	163575975
Wisp2	ENSMUSG00000027656	2	163646597	163658882
Kcnk15	ENSMUSG00000035238	2	163679387	163685482
Rims4	ENSMUSG00000035226	2	163685487	163744419
Ywhab	ENSMUSG00000018326	2	163820696	163844324
Pabpc1l	ENSMUSG00000054582	2	163851186	163876274
Tomm34	ENSMUSG00000018322	2	163879276	163896905
Stk4	ENSMUSG00000018209	2	163896058	163981260
Kcns1	ENSMUSG00000040164	2	163989355	163996849
Wfdc5	ENSMUSG00000040154	2	164002063	164008478
Wfdc12	ENSMUSG00000042845	2	164014967	164016344
Wfdc15a	ENSMUSG00000051769	2	164024599	164025866
Wfdc15b	ENSMUSG00000018211	2	164040190	164047396
Svs2	ENSMUSG00000040132	2	164061665	164064202
Svs3b	ENSMUSG00000050383	2	164080099	164082376
Svs4	ENSMUSG00000016998	2	164101688	164104195
Svs3a	ENSMUSG00000017003	2	164115004	164117236
Svs6	ENSMUSG00000017000	2	164142487	164144189
Svs5	ENSMUSG00000017004	2	164158476	164160132
Slpi	ENSMUSG00000017002	2	164179806	164214831
Matn4	ENSMUSG00000016995	2	164215129	164230660
Rbpjl	ENSMUSG00000017007	2	164228641	164240948
Sdc4	ENSMUSG00000017009	2	164249747	164269387
Sys1	ENSMUSG00000045503	2	164282464	164305138
Gm20458	ENSMUSG00000090996	2	164286467	164316260
Trp53tg5	ENSMUSG00000017720	2	164295801	164299224
Dbndd2	ENSMUSG00000017734	2	164311606	164318819
Pigt	ENSMUSG00000017721	2	164323020	164333801
Wfdc2	ENSMUSG00000017723	2	164387913	164394010
Spint3	ENSMUSG00000074596	2	164395195	164398959
Wfdc6a	ENSMUSG00000074595	2	164405019	164410947
Spinlw1	ENSMUSG00000017733	2	164413843	164419094
Wfdc8	ENSMUSG00000070533	2	164421958	164439126
Wfdc6b	ENSMUSG00000070531	2	164439022	164443712
Wfdc16	ENSMUSG00000070530	2	164460207	164464302
Wfdc9	ENSMUSG00000074594	2	164475131	164482083
Wfdc10	ENSMUSG00000070529	2	164481440	164482868
Wfdc11	ENSMUSG00000078940	2	164488394	164499587
Wfdc13	ENSMUSG00000067704	2	164510607	164513206
Spint4	ENSMUSG00000017310	2	164524001	164527953
Gm14316	ENSMUSG00000074593	2	164540805	164543568
Wfdc3	ENSMUSG00000076434	2	164556680	164571431
Wfdc3	ENSMUSG00000039951	2	164569065	164571431
Dnttip1	ENSMUSG00000017299	2	164571483	164594107
Ube2c	ENSMUSG00000001403	2	164595398	164604322
Tnnc2	ENSMUSG00000017300	2	164602661	164605467
Snx21	ENSMUSG00000050373	2	164611323	164619316
Acot8	ENSMUSG00000017307	2	164618268	164630382
Zswim3	ENSMUSG00000045822	2	164630598	164647630
Zswim1	ENSMUSG00000017764	2	164648186	164652371
1700020C07Rik	ENSMUSG00000017767	2	164651889	164654037
Neurl2	ENSMUSG00000039873	2	164656232	164658956
Ctsa	ENSMUSG00000017760	2	164658373	164666532
Pltp	ENSMUSG00000017754	2	164665018	164683211
Gm11451	ENSMUSG00000083567	2	162724630	162725259
Gm11452	ENSMUSG00000082514	2	162733660	162734349
Gm11453	ENSMUSG00000080962	2	162807991	162808997
Gm11454	ENSMUSG00000086152	2	162948342	162969695
Gm14254	ENSMUSG00000086036	2	162978631	162981842
0610008F07Rik	ENSMUSG00000046840	2	163319543	163367456
Gm16316	ENSMUSG00000087129	2	163510740	163518015
Gm14265	ENSMUSG00000082747	2	163660712	163661016
Gm11455	ENSMUSG00000085538	2	163961439	163966155
A730032A03Rik	ENSMUSG00000085649	2	164003320	164022300
Gm14302	ENSMUSG00000085760	2	164285396	164286455
Gm14317	ENSMUSG00000086179	2	164376030	164385230
Gm11456	ENSMUSG00000083740	2	164468445	164468700
Gm11457	ENSMUSG00000086453	2	164579742	164595166
BX323066.1	ENSMUSG00000093174	2	164637044	164637321
SNORA17	ENSMUSG00000077671	2	164447422	164447552
n-R5s207	ENSMUSG00000084446	2	163983140	163983257
U6	ENSMUSG00000065797	2	164427436	164427542
7SK	ENSMUSG00000088226	2	164587159	164587474
U6	ENSMUSG00000088408	2	163340252	163340354
AL591584.1	ENSMUSG00000092791	2	162918635	162918759
Gm14406	ENSMUSG00000078865	2	177353909	177362915
Gm14322	ENSMUSG00000078864	2	177493993	177505177
Gm14325	ENSMUSG00000078863	2	177566496	177575041
Gm14327	ENSMUSG00000074521	2	177631801	177640489
C330013J21Rik	ENSMUSG00000074529	2	177638045	177660318
Gm14326	ENSMUSG00000078862	2	177670698	177692002
Etohi1	ENSMUSG00000074519	2	177757989	177768727
Zfp931	ENSMUSG00000078861	2	177802400	177813181
Phactr3	ENSMUSG00000027525	2	177853680	178073197
Sycp2	ENSMUSG00000060445	2	178079998	178142390
Ppp1r3d	ENSMUSG00000049999	2	178145911	178149177
9030418K01Rik	ENSMUSG00000070476	2	178149229	178159133
Cdh26	ENSMUSG00000039155	2	178165236	178222071
4930591A17Rik	ENSMUSG00000039138	2	179149641	179151587
Cdh4	ENSMUSG00000000305	2	179177136	179634078
Gm14314	ENSMUSG00000082215	2	178754824	178755838
Gm14428	ENSMUSG00000083702	2	177715239	177717405
Gm17513	ENSMUSG00000090944	2	177758513	177763441
Gm14292	ENSMUSG00000061897	2	178912130	178912585
Gm14293	ENSMUSG00000081481	2	178975195	178975771
Gm14294	ENSMUSG00000081882	2	179098998	179099748
Gm14300	ENSMUSG00000083410	2	179347327	179348272
Gm14324	ENSMUSG00000080709	2	177469005	177473462
Gm14429	ENSMUSG00000081574	2	177586857	177590208
Gm14323	ENSMUSG00000082901	2	177627343	177627969
Lama5	ENSMUSG00000015647	2	179911078	179960564
Rps21	ENSMUSG00000039001	2	179992082	179993150
Cables2	ENSMUSG00000038990	2	179993245	180008201
BC066135	ENSMUSG00000038980	2	180012351	180024584
Gata5	ENSMUSG00000015627	2	180059838	180069404
Gm14318	ENSMUSG00000056061	2	180067562	180075437
Slco4a1	ENSMUSG00000038963	2	180190950	180209572
Ntsr1	ENSMUSG00000027568	2	180234681	180279685
1600027N09Rik	ENSMUSG00000027569	2	180316009	180321009
Ogfr	ENSMUSG00000049401	2	180323950	180330541
Col9a3	ENSMUSG00000027570	2	180332495	180356894
Tcfl5	ENSMUSG00000038932	2	180356661	180377413
Dido1	ENSMUSG00000038914	2	180392669	180444704
2310003C23Rik	ENSMUSG00000027573	2	180444822	180453438
Slc17a9	ENSMUSG00000023393	2	180459968	180476985
Bhlhe23	ENSMUSG00000045493	2	180509086	180511605
Ythdf1	ENSMUSG00000038848	2	180639082	180655654
Birc7	ENSMUSG00000038840	2	180663728	180668715
Nkain4	ENSMUSG00000027574	2	180669477	180689404
Arfgap1	ENSMUSG00000027575	2	180701930	180717231
9230112E08Rik	ENSMUSG00000070461	2	180718937	180720296
Col20a1	ENSMUSG00000016356	2	180721240	180752245
Chrna4	ENSMUSG00000027577	2	180753085	180778251
Kcnq2	ENSMUSG00000016346	2	180810284	180869996
Eef1a2	ENSMUSG00000016349	2	180882358	180891719
Ppdpf	ENSMUSG00000016344	2	180921952	180923476
Ptk6	ENSMUSG00000038751	2	180928426	180937494
Srms	ENSMUSG00000027579	2	180940267	180947890
BC051628	ENSMUSG00000047841	2	180954718	180957559
BC006779	ENSMUSG00000027580	2	180962320	180976732
Gmeb2	ENSMUSG00000038705	2	180986154	181022740
Stmn3	ENSMUSG00000027581	2	181041164	181049205
Rtel1	ENSMUSG00000038685	2	181054444	181091321
Arfrp1	ENSMUSG00000038671	2	181092395	181100109
Zgpat	ENSMUSG00000027582	2	181099633	181118333
Lime1	ENSMUSG00000090077	2	181114783	181118333
Zbtb46	ENSMUSG00000027583	2	181122467	181194131
Abhd16b	ENSMUSG00000055882	2	181227911	181229685
Tpd52l2	ENSMUSG00000000827	2	181231847	181252671
Dnajc5	ENSMUSG00000000826	2	181255190	181289838
Uckl1	ENSMUSG00000089917	2	181303854	181319597
Znf512b	ENSMUSG00000000823	2	181316808	181327508
Prpf6	ENSMUSG00000002455	2	181326573	181390365
Samd10	ENSMUSG00000038605	2	181329923	181333917
Sox18	ENSMUSG00000046470	2	181404541	181406345
Tcea2	ENSMUSG00000059540	2	181415015	181422776
Rgs19	ENSMUSG00000002458	2	181423124	181428682
4930526D03Rik	ENSMUSG00000045794	2	181431498	181433147
Oprl1	ENSMUSG00000027584	2	181449721	181455690
Myt1	ENSMUSG00000010505	2	181498037	181562502
Pcmtd2	ENSMUSG00000027589	2	181572559	181592166
Polr3k	ENSMUSG00000038628	2	181599042	181605535
Gm14496	ENSMUSG00000053277	2	181725841	181731135
B230312C02Rik	ENSMUSG00000084843	2	180105196	180120590
Gm14343	ENSMUSG00000087550	2	180500919	180510108
Gm14340	ENSMUSG00000074507	2	180553048	180559335
Gm14342	ENSMUSG00000086166	2	180564195	180624365
Gm14344	ENSMUSG00000085428	2	180571186	180583619
Gm14339	ENSMUSG00000085728	2	180582357	180583751
Gm14341	ENSMUSG00000087293	2	180689169	180701517
Gm14398	ENSMUSG00000083993	2	180951432	180952504
Gm14447	ENSMUSG00000084033	2	181026853	181027640
Slc2a4rg-ps	ENSMUSG00000085028	2	181118955	181122291
Gm16119	ENSMUSG00000010492	2	181313185	181319875
Gm14489	ENSMUSG00000082786	2	181458747	181459647
Gm5466	ENSMUSG00000083397	2	181631528	181633417
U1	ENSMUSG00000088378	2	181247255	181247417
U6	ENSMUSG00000089612	2	181160640	181160742
U6	ENSMUSG00000077518	2	181397011	181397117
Mir3091	ENSMUSG00000092827	2	179992241	179992316
Mir124a-3	ENSMUSG00000065454	2	180628736	180628822
HAR1F	ENSMUSG00000088334	2	180572532	180572663
U6	ENSMUSG00000084696	2	180918217	180918320
U6	ENSMUSG00000064422	2	180432768	180432874
Mir133a-2	ENSMUSG00000065460	2	180133084	180133187
Mir1a-1	ENSMUSG00000070144	2	180123753	180123829
Gm9791	ENSMUSG00000044434	3	33903939	33904385
Sox2ot	ENSMUSG00000090828	3	34003360	34581541
Gm5708	ENSMUSG00000092249	3	34082229	34083114
Gm20446	ENSMUSG00000092196	3	34197440	34221211
Gm20514	ENSMUSG00000092355	3	34223741	34250637
Gm20515	ENSMUSG00000092242	3	34326295	34334019
Ttc14	ENSMUSG00000027677	3	33698877	33713782
Ccdc39	ENSMUSG00000027676	3	33711284	33743232
Fxr1	ENSMUSG00000027680	3	33919001	33968264
Dnajc19	ENSMUSG00000027679	3	33954942	33980243
Sox2	ENSMUSG00000074637	3	34548927	34551383
SNORA17	ENSMUSG00000077559	3	33857991	33858122
Mir1897	ENSMUSG00000084530	3	34537386	34537464
AC158547.1	ENSMUSG00000093499	3	35224536	35224627
AC137708.1	ENSMUSG00000093307	3	34489443	34489530
Gm6525	ENSMUSG00000078175	3	83978696	83979016
Gm8813	ENSMUSG00000085625	3	84356780	84357374
Dear1	ENSMUSG00000078550	3	84768978	84769502
Gm15535	ENSMUSG00000085527	3	85359968	85377867
Gm9790	ENSMUSG00000044330	3	85719705	85719992
Mnd1	ENSMUSG00000033752	3	83891856	83959708
Trim2	ENSMUSG00000027993	3	83964361	84109368
Fhdc1	ENSMUSG00000041842	3	84247947	84284351
Arfip1	ENSMUSG00000074513	3	84300015	85691438
Tigd4	ENSMUSG00000047819	3	84397496	84400954
Tmem154	ENSMUSG00000056498	3	84470114	84508497
Fbxw7	ENSMUSG00000028086	3	84619190	84783120
Pet112l	ENSMUSG00000028085	3	85378041	85459544
Fam160a1	ENSMUSG00000051000	3	85463983	85550188
Glt28d2	ENSMUSG00000031286	3	85604969	85691440
Prss48	ENSMUSG00000049013	3	85797732	85806413
Sh3d19	ENSMUSG00000028082	3	85888356	85934444
Rps3a	ENSMUSG00000028081	3	85941862	85946624
Snord73a	ENSMUSG00000064984	3	85942713	85942780
Rnu73b	ENSMUSG00000064390	3	85944540	85944610
U7	ENSMUSG00000089077	3	85766693	85766754
SNORA32	ENSMUSG00000065847	3	85904456	85904577
Mir466k	ENSMUSG00000080424	3	85271299	85271420
U6	ENSMUSG00000064840	3	85712275	85712381
SNORA32	ENSMUSG00000077517	3	85754810	85754928
U6	ENSMUSG00000089394	3	85995338	85995448
Cenpe	ENSMUSG00000045328	3	134875527	134936504
Bdh2	ENSMUSG00000028167	3	134944185	134967390
Nhedc2	ENSMUSG00000037994	3	134970664	135005731
Nhedc1	ENSMUSG00000050150	3	135010993	135060791
Cisd2	ENSMUSG00000028165	3	135069376	135086889
Ube2d3	ENSMUSG00000078578	3	135101261	135130142
Manba	ENSMUSG00000028164	3	135148575	135234368
Nfkb1	ENSMUSG00000028163	3	135247619	135354511
Gm9799	ENSMUSG00000045520	3	135390302	135391702
Slc39a8	ENSMUSG00000053897	3	135488243	135551536
Bank1	ENSMUSG00000037922	3	135716327	135989030
Ppp3ca	ENSMUSG00000028161	3	136333088	136600691
Gm10955	ENSMUSG00000078574	3	136615239	136625603
Gm16100	ENSMUSG00000083045	3	135158617	135158847
Gm9329	ENSMUSG00000083610	3	135188928	135189496
Gm16500	ENSMUSG00000091791	3	135626423	135626782
4930539J05Rik	ENSMUSG00000090593	3	135099190	135100723
U6	ENSMUSG00000065906	3	136730856	136730962
Prkacb	ENSMUSG00000005034	3	146392543	146475924
Gm10288	ENSMUSG00000070343	3	146501775	146502311
Ttll7	ENSMUSG00000036745	3	146515331	146646973
SNORA17	ENSMUSG00000077441	3	148017051	148017182
Lphn2	ENSMUSG00000028184	3	148478550	148652280
U6	ENSMUSG00000065270	3	148691896	148692002
Gm9912	ENSMUSG00000053583	3	148848115	148848459
Gm10287	ENSMUSG00000070342	3	148884657	148888709
U6	ENSMUSG00000089269	3	149003867	149003972
Msh4	ENSMUSG00000005493	3	153520111	153569102
Rabggtb	ENSMUSG00000038975	3	153570253	153575930
Acadm	ENSMUSG00000062908	3	153585321	153607596
Slc44a5	ENSMUSG00000028360	3	153636400	153934686
Lhx8	ENSMUSG00000093486	3	153969252	153993615
Lhx8	ENSMUSG00000028201	3	153969260	153993615
Tyw3	ENSMUSG00000047583	3	154239484	154260068
Cryz	ENSMUSG00000028199	3	154259675	154286146
4922501L14Rik	ENSMUSG00000042943	3	154327060	154420491
BC007180	ENSMUSG00000078161	3	154425121	154430751
Tnni3k	ENSMUSG00000040086	3	154449266	154718371
Fpgt	ENSMUSG00000053870	3	154747885	154756342
Lrriq3	ENSMUSG00000028182	3	154756398	154857242
Gm3076	ENSMUSG00000090114	3	153795304	153795754
AI606473	ENSMUSG00000093738	3	153993785	153997218
Gm20389	ENSMUSG00000092522	3	154371622	154374307
SNORA17	ENSMUSG00000088764	3	153527771	153527895
Snord45c	ENSMUSG00000065463	3	153575089	153575168
Snord45b	ENSMUSG00000064731	3	153573527	153573597
AC087184.1	ENSMUSG00000093463	3	153557665	153557735
SNORD45	ENSMUSG00000065738	3	153574574	153574654
Y_RNA	ENSMUSG00000064765	3	154754982	154755092
U6	ENSMUSG00000065807	3	155451329	155451432
Cngb3	ENSMUSG00000056494	4	19207997	19437770
Cpne3	ENSMUSG00000028228	4	19446401	19497255
Fam82b	ENSMUSG00000028229	4	19502309	19534079
Gm12353	ENSMUSG00000078772	4	19532598	19578277
Wwp1	ENSMUSG00000041058	4	19535450	19636140
Slc7a13	ENSMUSG00000041052	4	19745872	19769365
Atp6v0d2	ENSMUSG00000028238	4	19803988	19849752
Ttpa	ENSMUSG00000073988	4	19935085	19957932
Ggh	ENSMUSG00000073987	4	19968857	19993897
Nkain3	ENSMUSG00000055761	4	20046021	20706013
4930598A11Rik	ENSMUSG00000090934	4	19959993	19968711
Gm12393	ENSMUSG00000083105	4	19186243	19187090
Gm11877	ENSMUSG00000082320	4	19225480	19226331
Gm12354	ENSMUSG00000086071	4	19643879	19647346
4930480G23Rik	ENSMUSG00000086332	4	19906592	19912535
Gm11872	ENSMUSG00000086017	4	20270853	20274965
Gm11873	ENSMUSG00000081964	4	20318243	20319546
Gm11871	ENSMUSG00000083315	4	20937027	20938087
7SK	ENSMUSG00000089090	4	19441637	19441926
Zfp462	ENSMUSG00000060206	4	54957920	55096435
Rad23b	ENSMUSG00000028426	4	55362915	55405109
Klf4	ENSMUSG00000003032	4	55540013	55545347
Actl7b	ENSMUSG00000070980	4	56752879	56754297
Actl7a	ENSMUSG00000070979	4	56756294	56757797
Ikbkap	ENSMUSG00000028431	4	56762552	56815203
BC026590	ENSMUSG00000038827	4	56815217	56822473
Ctnnal1	ENSMUSG00000038816	4	56823807	56878060
D730040F13Rik	ENSMUSG00000055296	4	56879795	56960309
6430704M03Rik	ENSMUSG00000045589	4	56970045	57003263
Gm12515	ENSMUSG00000082704	4	55129435	55129795
Gm12514	ENSMUSG00000087614	4	55144080	55292351
Gm12509	ENSMUSG00000081177	4	55175880	55176488
Gm12508	ENSMUSG00000081504	4	55267609	55268091
Gm12512	ENSMUSG00000081542	4	55294936	55295152
Gm12516	ENSMUSG00000084144	4	55405189	55405573
Gm12513	ENSMUSG00000084404	4	55421828	55422179
Gm12505	ENSMUSG00000087070	4	55423315	55431714
Gm12510	ENSMUSG00000086346	4	55463556	55478686
Gm12507	ENSMUSG00000082952	4	55521166	55521580
Gm12511	ENSMUSG00000066176	4	55576137	55612168
Gm12506	ENSMUSG00000085375	4	55618021	55649773
Gm12519	ENSMUSG00000085643	4	55981895	56006611
Gm12520	ENSMUSG00000081290	4	56175812	56176127
2310081O03Rik	ENSMUSG00000085020	4	56233489	56237393
Gm12518	ENSMUSG00000082613	4	56400674	56401452
SNORA44	ENSMUSG00000064595	4	56926514	56926639
SNORA42	ENSMUSG00000080370	4	56774794	56774913
SNORA17	ENSMUSG00000077635	4	55481897	55482031
SNORA43	ENSMUSG00000077170	4	56910498	56910629
SNORA17	ENSMUSG00000077663	4	56691776	56691907
Mir32	ENSMUSG00000065544	4	56908101	56908170
BX470220.1	ENSMUSG00000092886	4	56968294	56968363
U3	ENSMUSG00000077403	4	55312528	55312717
Epb4.1l4b	ENSMUSG00000028434	4	57004844	57156309
Ptpn3	ENSMUSG00000038764	4	57203713	57314709
Gm12530	ENSMUSG00000085967	4	57184943	57189426
Gm12536	ENSMUSG00000085654	4	57312968	57320177
1700042G15Rik	ENSMUSG00000087044	4	57373740	57377164
Gm12537	ENSMUSG00000078696	4	57383645	57384897
Sepn1	ENSMUSG00000050989	4	134093807	134108081
Man1c1	ENSMUSG00000037306	4	134117605	134260205
Ldlrap1	ENSMUSG00000037295	4	134300650	134323939
Tmem57	ENSMUSG00000028826	4	134358674	134409260
Rhd	ENSMUSG00000028825	4	134420451	134452087
Tmem50a	ENSMUSG00000028822	4	134453764	134470939
D4Wsu53e	ENSMUSG00000037266	4	134479507	134483586
Syf2	ENSMUSG00000028821	4	134486813	134493463
Runx3	ENSMUSG00000070691	4	134676567	134733905
Clic4	ENSMUSG00000037242	4	134769884	134828729
Srrm1	ENSMUSG00000028809	4	134876399	134909236
A330049M08Rik	ENSMUSG00000043924	4	134925491	134954142
Rcan3	ENSMUSG00000059713	4	134968223	134989768
Nipal3	ENSMUSG00000028803	4	135001335	135050953
4930555I21Rik	ENSMUSG00000028801	4	135050705	135093720
Grhl3	ENSMUSG00000037188	4	135097803	135129545
Il28ra	ENSMUSG00000062157	4	135242202	135264096
Il22ra1	ENSMUSG00000037157	4	135284087	135308055
9130219A07Rik	ENSMUSG00000054579	4	135308094	135311298
Myom3	ENSMUSG00000037139	4	135315630	135371479
Srsf10	ENSMUSG00000028676	4	135411662	135425823
Pnrc2	ENSMUSG00000028675	4	135426833	135429765
Cnr2	ENSMUSG00000062585	4	135451309	135476122
Fuca1	ENSMUSG00000028673	4	135476650	135496226
Hmgcl	ENSMUSG00000028672	4	135502363	135518532
Gale	ENSMUSG00000028671	4	135519642	135524093
Lypla2	ENSMUSG00000028670	4	135524139	135528541
1110049F12Rik	ENSMUSG00000028669	4	135531375	135543179
Tceb3	ENSMUSG00000028668	4	135559283	135577678
Rpl11	ENSMUSG00000059291	4	135584180	135609343
Id3	ENSMUSG00000007872	4	135699412	135701670
E2f2	ENSMUSG00000018983	4	135728309	135751972
Asap3	ENSMUSG00000036995	4	135762280	135801131
Tcea3	ENSMUSG00000001604	4	135803644	135830813
Zfp46	ENSMUSG00000051351	4	135840598	135849857
Hnrnpr	ENSMUSG00000066037	4	135866857	135896596
Htr1d	ENSMUSG00000070687	4	135979439	136000313
6030445D17Rik	ENSMUSG00000066178	4	136018165	136019892
Luzp1	ENSMUSG00000001089	4	136025676	136110695
Gm16225	ENSMUSG00000086884	4	134674136	134676362
Gm16224	ENSMUSG00000084986	4	134699336	134700200
Gm12983	ENSMUSG00000087270	4	134846281	134846590
Gm12984	ENSMUSG00000085002	4	134863264	134865434
Gm12982	ENSMUSG00000082833	4	134863696	134863885
Gm12991	ENSMUSG00000084032	4	134933073	134933150
Gm12990	ENSMUSG00000081136	4	134959104	134959571
Gm15979	ENSMUSG00000087016	4	134986041	134986756
1700029M20Rik	ENSMUSG00000086788	4	135182570	135186113
Gm12989	ENSMUSG00000083678	4	135271783	135272513
Gm12988	ENSMUSG00000082743	4	135312133	135312610
Gm13000	ENSMUSG00000081672	4	135409593	135410088
Gm13006	ENSMUSG00000083430	4	135447179	135447392
Gm13007	ENSMUSG00000083852	4	135553438	135553802
Gm13008	ENSMUSG00000085714	4	135559481	135566852
Gm13009	ENSMUSG00000082877	4	135630428	135630887
Gm13013	ENSMUSG00000081330	4	135863279	135863801
2610528B01Rik	ENSMUSG00000086084	4	135899890	135901896
9130020K20Rik	ENSMUSG00000086568	4	135904465	135906249
Gm17388	ENSMUSG00000091448	4	135911689	135913957
U6	ENSMUSG00000088179	4	135139663	135139763
AL670720.1	ENSMUSG00000080474	4	135068266	135068394
U6	ENSMUSG00000088614	4	135693411	135693513
AL672076.1	ENSMUSG00000092785	4	135573828	135574122
Mir700	ENSMUSG00000076123	4	134972470	134972548
AL645531.1	ENSMUSG00000093225	4	134350946	134351019
Kdm1a	ENSMUSG00000036940	4	136106455	136158638
4930549C01Rik	ENSMUSG00000036921	4	136166352	136169141
Ephb2	ENSMUSG00000028664	4	136203454	136391903
Gm12987	ENSMUSG00000082711	4	136140087	136140575
Gm12986	ENSMUSG00000083054	4	136164755	136165721
Lactbl1	ENSMUSG00000070683	4	136178507	136193795
AL671173.1	ENSMUSG00000092747	4	136165721	136165779
C1qb	ENSMUSG00000036905	4	136436044	136442102
C1qc	ENSMUSG00000036896	4	136445719	136448980
C1qa	ENSMUSG00000036887	4	136451832	136454718
Epha8	ENSMUSG00000028661	4	136485334	136512731
Zbtb40	ENSMUSG00000060862	4	136535647	136604716
Wnt4	ENSMUSG00000036856	4	136833404	136855641
Cdc42	ENSMUSG00000006699	4	136875611	136913635
Gm13011	ENSMUSG00000078520	4	136957469	136965706
Cela3b	ENSMUSG00000023433	4	136976914	136986455
1700013G24Rik	ENSMUSG00000041399	4	137009199	137011376
Hspg2	ENSMUSG00000028763	4	137024634	137126545
Ldlrad2	ENSMUSG00000070666	4	137126791	137130558
Usp48	ENSMUSG00000043411	4	137149670	137214452
Rap1gap	ENSMUSG00000041351	4	137220641	137285782
Alpl	ENSMUSG00000028766	4	137297648	137352299
Ece1	ENSMUSG00000057530	4	137418152	137521144
1700037C06Rik	ENSMUSG00000085542	4	136672624	136673497
Gm13001	ENSMUSG00000087417	4	136673058	136674058
Gm13003	ENSMUSG00000085833	4	136714997	136715786
Gm13005	ENSMUSG00000080806	4	136775675	136776314
Gm13002	ENSMUSG00000082149	4	136778556	136779237
Gm13004	ENSMUSG00000070667	4	136951208	136951623
Gm13010	ENSMUSG00000086845	4	136992494	136994310
1810058N05Rik	ENSMUSG00000087476	4	137252894	137262521
Gm13012	ENSMUSG00000085823	4	137438285	137439852
AL807764.1	ENSMUSG00000092721	4	137507039	137507371
U6	ENSMUSG00000089199	4	136881474	136881529
BX000694.1	ENSMUSG00000092863	4	137140000	137140271
AL671011.1	ENSMUSG00000092848	4	136739980	136740055
SNORA17	ENSMUSG00000077624	4	136581599	136581727
AL671011.2	ENSMUSG00000093294	4	136739902	136739977
Eif4g3	ENSMUSG00000028760	4	137548937	137764423
1700095J12Rik	ENSMUSG00000084804	4	137693510	137694433
Hp1bp3	ENSMUSG00000028759	4	137772211	137800598
Sh2d5	ENSMUSG00000045349	4	137806318	137817247
Kif17	ENSMUSG00000028758	4	137806350	137857882
2310026L22Rik	ENSMUSG00000078519	4	137771629	137772104
1700012P22Rik	ENSMUSG00000028589	4	144008092	144028675
Gm13225	ENSMUSG00000078503	4	145100662	145129091
Gm13242	ENSMUSG00000058186	4	145104787	145294344
Gm13212	ENSMUSG00000078502	4	145175069	145215248
Gm13235	ENSMUSG00000078500	4	145458697	145489878
Gm13248	ENSMUSG00000063245	4	145539879	145587078
Gm13247	ENSMUSG00000056300	4	145658647	145696012
Gm13251	ENSMUSG00000070605	4	145727747	145749016
Pramel5	ENSMUSG00000036749	4	143860536	143870391
Gm13128	ENSMUSG00000078508	4	143920152	143923368
Gm13119	ENSMUSG00000070619	4	143947845	143954322
Gm13125	ENSMUSG00000073721	4	143962663	143967836
Pramef12	ENSMUSG00000028591	4	143981577	143998367
Tnfrsf8	ENSMUSG00000028602	4	144857040	144905067
Gm9944	ENSMUSG00000054345	4	144041123	144043544
Aadacl3	ENSMUSG00000078507	4	144043674	144053659
9430007A20Rik	ENSMUSG00000028593	4	144109725	144119256
Gm13124	ENSMUSG00000078506	4	144144903	144155037
Gm13177	ENSMUSG00000070609	4	144203610	144213301
Gm436	ENSMUSG00000078505	4	144259840	144276271
Gm13178	ENSMUSG00000041735	4	144293094	144311307
Gm438	ENSMUSG00000078504	4	144367107	144376486
Dhrs3	ENSMUSG00000066026	4	144482730	144518112
Vps13d	ENSMUSG00000073719	4	144562526	144564586
Vps13d	ENSMUSG00000020220	4	144562529	144784898
Tnfrsf1b	ENSMUSG00000028599	4	144803366	144836773
Gm13123	ENSMUSG00000083708	4	143837680	143838171
Gm13120	ENSMUSG00000082221	4	143886595	143888040
Gm13130	ENSMUSG00000080943	4	143892864	143894844
Gm13122	ENSMUSG00000084312	4	143935500	143935952
D530049N12Rik	ENSMUSG00000028590	4	143994771	143996204
Gm13118	ENSMUSG00000082835	4	144088303	144088851
Gm13121	ENSMUSG00000083390	4	144116314	144116945
Gm13126	ENSMUSG00000082418	4	144135409	144138471
Gm13127	ENSMUSG00000070610	4	144177147	144178535
Prdx2-rs3	ENSMUSG00000083998	4	144381740	144382563
Gm13024	ENSMUSG00000082758	4	144980846	144981563
Gm13224	ENSMUSG00000084272	4	144994209	144994302
Gm13227	ENSMUSG00000085101	4	145000148	145039659
Gm13230	ENSMUSG00000082082	4	145036643	145040791
Gm13223	ENSMUSG00000083081	4	145045536	145046282
Smarca5-ps	ENSMUSG00000052912	4	145054107	145057323
Gm13229	ENSMUSG00000087076	4	145059612	145059953
Gm13228	ENSMUSG00000082352	4	145164431	145165064
Gm13226	ENSMUSG00000083454	4	145166792	145167195
Gm13222	ENSMUSG00000080732	4	145168939	145169076
Gm13234	ENSMUSG00000083562	4	145222407	145223153
Gm13231	ENSMUSG00000081885	4	145231260	145234302
Gm13249	ENSMUSG00000081983	4	145236674	145237018
Gm13239	ENSMUSG00000082615	4	145279745	145280381
Gm13232	ENSMUSG00000084279	4	145319484	145320115
Gm13244	ENSMUSG00000082334	4	145335649	145337304
Gm13236	ENSMUSG00000087513	4	145352832	145354861
Gm13243	ENSMUSG00000081192	4	145364622	145365186
1700029I01Rik	ENSMUSG00000084350	4	145415140	145419845
Gm13238	ENSMUSG00000082999	4	145427122	145427901
Gm13246	ENSMUSG00000083235	4	145434307	145434621
Gm13240	ENSMUSG00000081710	4	145593263	145593827
Gm13233	ENSMUSG00000083038	4	145615727	145617410
Gm13237	ENSMUSG00000066002	4	145632857	145633949
1700095A21Rik	ENSMUSG00000086046	4	145651166	145679000
Gm13245	ENSMUSG00000081998	4	145717113	145717372
Gm13241	ENSMUSG00000073716	4	145721928	145722710
Gm17609	ENSMUSG00000090398	4	145191866	145301871
Gm17565	ENSMUSG00000090554	4	145686275	145688945
AL929465.1	ENSMUSG00000080584	4	145454975	145455095
U1	ENSMUSG00000077327	4	144355530	144355695
Sod3	ENSMUSG00000072941	5	52755185	52762644
Ccdc149	ENSMUSG00000045790	5	52765892	52766785
Lgi2	ENSMUSG00000039252	5	52924758	52957542
8030423F21Rik	ENSMUSG00000052295	5	52998789	53010250
Sepsecs	ENSMUSG00000029173	5	53031326	53060968
Pi4k2b	ENSMUSG00000029186	5	53132826	53160583
Zcchc4	ENSMUSG00000029179	5	53166648	53215904
Anapc4	ENSMUSG00000029176	5	53225254	53259036
Slc34a2	ENSMUSG00000029188	5	53429321	53462903
Sel1l3	ENSMUSG00000029189	5	53498323	53604691
1810013D10Rik	ENSMUSG00000061461	5	53658345	53674749
Rbpj	ENSMUSG00000039191	5	53947018	54048684
Cckar	ENSMUSG00000029193	5	54089015	54098943
Tbc1d19	ENSMUSG00000039178	5	54200866	54295619
Stim2	ENSMUSG00000039156	5	54389656	54512296
Gm17182	ENSMUSG00000090642	5	53438926	53440426
Gm15820	ENSMUSG00000081266	5	54485240	54486280
n-R5s172	ENSMUSG00000077696	5	53737498	53737611
SNORA42	ENSMUSG00000077757	5	53350590	53350701
U6	ENSMUSG00000088981	5	52734357	52734461
5S_rRNA	ENSMUSG00000088646	5	53809812	53809921
n-R5s171	ENSMUSG00000077316	5	53534399	53534477
snoMe28S-Cm3227	ENSMUSG00000089535	5	54681415	54681497
G6pd2	ENSMUSG00000089992	5	62200082	62201716
Arap2	ENSMUSG00000037999	5	62993684	63157437
SNORA17	ENSMUSG00000077228	5	62523592	62523723
SNORA17	ENSMUSG00000077286	5	62914647	62914778
SNORA17	ENSMUSG00000077555	5	61108556	61108678
Gm17384	ENSMUSG00000090326	5	63205062	63279547
3110047P20Rik	ENSMUSG00000090061	5	64040342	64201785
Gm9954	ENSMUSG00000054714	5	64041189	64041503
0610040J01Rik	ENSMUSG00000060512	5	64203734	64290858
Rell1	ENSMUSG00000047881	5	64300135	64360144
Gm3687	ENSMUSG00000090138	5	64085429	64085749
Gm15819	ENSMUSG00000087552	5	64315140	64316208
SNORA17	ENSMUSG00000077209	5	64393592	64393723
Pgm1	ENSMUSG00000029171	5	64484175	64519594
Tbc1d1	ENSMUSG00000029174	5	64550690	64742725
Gm15824	ENSMUSG00000083435	5	64581271	64582228
Gm15823	ENSMUSG00000081143	5	64643817	64644445
AC132271.2	ENSMUSG00000093780	5	64498646	64498741
SNORA17	ENSMUSG00000087954	5	64535487	64535620
AC132271.1	ENSMUSG00000093235	5	64492669	64492746
Kdr	ENSMUSG00000062960	5	76328852	76374483
Srd5a3	ENSMUSG00000029233	5	76569296	76584529
Tmem165	ENSMUSG00000029234	5	76612905	76638270
Clock	ENSMUSG00000029238	5	76639992	76733817
Pdcl2	ENSMUSG00000029235	5	76741140	76760181
Nmu	ENSMUSG00000029236	5	76762520	76792813
Gm7271	ENSMUSG00000091204	5	76913356	76945609
Exoc1	ENSMUSG00000036435	5	76958336	76999319
Cep135	ENSMUSG00000036403	5	77017723	77075491
Gm10430	ENSMUSG00000072855	5	77085537	77087380
C530008M17Rik	ENSMUSG00000036377	5	77086708	77302579
Aasdh	ENSMUSG00000055923	5	77302684	77334539
Ppat	ENSMUSG00000029246	5	77342274	77380603
Paics	ENSMUSG00000029247	5	77380332	77396534
Srp72	ENSMUSG00000036323	5	77403708	77428962
Arl9	ENSMUSG00000063820	5	77433080	77439631
1700023E05Rik	ENSMUSG00000029248	5	77445048	77490554
Hopx	ENSMUSG00000059325	5	77515468	77544186
Gm15831	ENSMUSG00000085858	5	77545835	77551373
Spink2	ENSMUSG00000053030	5	77634132	77640496
Rest	ENSMUSG00000029249	5	77694516	77715457
Noa1	ENSMUSG00000036285	5	77723199	77739109
Polr2b	ENSMUSG00000029250	5	77739172	77778349
Igfbp7	ENSMUSG00000036256	5	77778265	77837070
Apc-ps1	ENSMUSG00000083152	5	76625650	76626119
4930432L08Rik	ENSMUSG00000087037	5	76760263	76770910
Gm7494	ENSMUSG00000083874	5	77171098	77171538
2310040G07Rik	ENSMUSG00000072852	5	77357393	77376783
1700112J05Rik	ENSMUSG00000086632	5	77435474	77447888
Gm15830	ENSMUSG00000087541	5	77523557	77531328
Pea15b	ENSMUSG00000047652	5	77940293	77940676
Mir5098	ENSMUSG00000093061	5	77701782	77701863
5S_rRNA	ENSMUSG00000089481	5	76402344	76402466
SNORA17	ENSMUSG00000089415	5	78098749	78098871
snoU13	ENSMUSG00000089567	5	77520753	77520856
AC134903.1	ENSMUSG00000088783	5	76305852	76305952
Oas1a	ENSMUSG00000052776	5	121346265	121357536
Oas1d	ENSMUSG00000032623	5	121364354	121371661
Rph3a	ENSMUSG00000029608	5	121390511	121459527
Ptpn11	ENSMUSG00000043733	5	121580542	121641406
Rpl6	ENSMUSG00000029614	5	121654490	121659250
Gm15800	ENSMUSG00000042744	5	121670228	121818586
Trafd1	ENSMUSG00000042726	5	121821734	121835641
Naa25	ENSMUSG00000042719	5	121847945	121894387
Erp29	ENSMUSG00000029616	5	121878599	121902515
Tmem116	ENSMUSG00000029452	5	121901902	121974192
Adam1b	ENSMUSG00000062438	5	121950106	121952989
Adam1a	ENSMUSG00000072647	5	121968613	121971704
Mapkapk5	ENSMUSG00000029454	5	121968622	121995914
Aldh2	ENSMUSG00000029455	5	122016036	122043833
Acad12	ENSMUSG00000042647	5	122048293	122068947
Acad10	ENSMUSG00000029456	5	122071035	122110523
Brap	ENSMUSG00000029458	5	122110572	122137257
Atxn2	ENSMUSG00000042605	5	122161346	122266502
Sh2b3	ENSMUSG00000042594	5	122265497	122286868
Fam109a	ENSMUSG00000044134	5	122299037	122304608
Cux2	ENSMUSG00000042589	5	122307972	122500111
Myl2	ENSMUSG00000013936	5	122550960	122563481
Ccdc63	ENSMUSG00000043036	5	122558049	122588966
Ppp1cc	ENSMUSG00000004455	5	122608287	122625282
Hvcn1	ENSMUSG00000064267	5	122656813	122692306
Tctn1	ENSMUSG00000038593	5	122691296	122714469
Pptc7	ENSMUSG00000038582	5	122734374	122774290
Rad9b	ENSMUSG00000038569	5	122773232	122804242
Vps29	ENSMUSG00000029462	5	122804378	122814993
1500011H22Rik	ENSMUSG00000029463	5	122814589	122822373
Gpn3	ENSMUSG00000029464	5	122821885	122832911
Arpc3	ENSMUSG00000029465	5	122841887	122856188
Anapc7	ENSMUSG00000029466	5	122871702	122894921
Atp2a2	ENSMUSG00000029467	5	122903531	122952183
Ift81	ENSMUSG00000029469	5	123000213	123064527
P2rx7	ENSMUSG00000029468	5	123093920	123141441
Gm10064	ENSMUSG00000059352	5	123147205	123147612
P2rx4	ENSMUSG00000029470	5	123157593	123179747
Camkk2	ENSMUSG00000029471	5	123183213	123229391
Anapc5	ENSMUSG00000029472	5	123237478	123271348
Rnf34	ENSMUSG00000029474	5	123300197	123318954
Kdm2b	ENSMUSG00000029475	5	123320677	123465089
Gm15546	ENSMUSG00000082760	5	121921572	121922397
Gm15547	ENSMUSG00000082265	5	121980572	121980904
Gm16552	ENSMUSG00000089729	5	122167675	122177412
Cux2	ENSMUSG00000072641	5	122308562	122308977
Gm15637	ENSMUSG00000087386	5	122498391	122505663
Gm15481	ENSMUSG00000082645	5	122703011	122703549
Gm15842	ENSMUSG00000083909	5	122752431	122753048
Gm15846	ENSMUSG00000079906	5	122888605	122888924
U6	ENSMUSG00000088583	5	122956798	122956898
U1	ENSMUSG00000077347	5	121806853	121807010
SNORA42	ENSMUSG00000064841	5	121655019	121655152
Uncx	ENSMUSG00000029546	5	140019448	140079180
Micall2	ENSMUSG00000036718	5	140182647	140212290
Ints1	ENSMUSG00000029547	5	140227236	140251632
Mafk	ENSMUSG00000018143	5	140267467	140278607
Tmem184a	ENSMUSG00000036687	5	140278439	140295871
Psmg3	ENSMUSG00000029551	5	140299548	140302797
Elfn1	ENSMUSG00000048988	5	140383897	140450665
Mad1l1	ENSMUSG00000029554	5	140484643	140797506
Ftsj2	ENSMUSG00000029557	5	140803628	140807852
Nudt1	ENSMUSG00000036639	5	140807814	140814091
Snx8	ENSMUSG00000029560	5	140816258	140865216
Eif3b	ENSMUSG00000056076	5	140895259	140919314
Chst12	ENSMUSG00000036599	5	140981504	141001678
Grifin	ENSMUSG00000036586	5	141039073	141041025
Lfng	ENSMUSG00000029570	5	141083295	141091497
Ttyh3	ENSMUSG00000036565	5	141096540	141124985
Iqce	ENSMUSG00000036555	5	141137781	141178332
Baat1	ENSMUSG00000000148	5	141180965	141195333
Amz1	ENSMUSG00000050022	5	141200081	141237393
Gna12	ENSMUSG00000000149	5	141234362	141306385
Card11	ENSMUSG00000036526	5	141348953	141476550
Sdk1	ENSMUSG00000039683	5	141717444	142691540
Gm16122	ENSMUSG00000085673	5	140550059	140561466
Gm16121	ENSMUSG00000087606	5	140577153	140583545
Gm16120	ENSMUSG00000087248	5	140683339	140686705
Gm6433	ENSMUSG00000083382	5	141743535	141744409
Gm16035	ENSMUSG00000084934	5	141849133	141856880
AC161570.1	ENSMUSG00000093344	5	141556385	141556463
7SK	ENSMUSG00000064694	5	140320884	140321204
U6	ENSMUSG00000089164	5	142042097	142042203
Gm16036	ENSMUSG00000085540	5	142071939	142091956
Foxk1	ENSMUSG00000056493	5	142877451	142937968
C330006K01Rik	ENSMUSG00000039623	5	142939885	142954669
Radil	ENSMUSG00000029576	5	142960793	143027052
Papolb	ENSMUSG00000074817	5	143001792	143006030
Mmd2	ENSMUSG00000039533	5	143038319	143084754
Wipi2	ENSMUSG00000029578	5	143105496	143146542
Tes	ENSMUSG00000029552	6	17015149	17055828
Cav2	ENSMUSG00000000058	6	17231185	17239115
Cav1	ENSMUSG00000007655	6	17256335	17291452
Met	ENSMUSG00000009376	6	17413800	17523980
Capza2	ENSMUSG00000015733	6	17586234	17616972
St7	ENSMUSG00000029534	6	17642933	17893025
Wnt2	ENSMUSG00000010797	6	17938940	17980585
Asz1	ENSMUSG00000010796	6	18000964	18059061
Cftr	ENSMUSG00000041301	6	18120687	18272768
Cttnbp2	ENSMUSG00000000416	6	18316478	18465338
Naa38	ENSMUSG00000044155	6	18798579	18805751
Ankrd7	ENSMUSG00000029517	6	18816318	18829586
Gm15473	ENSMUSG00000084772	6	17008806	17014996
Gm4876	ENSMUSG00000054556	6	17015010	17121833
D830026I12Rik	ENSMUSG00000085171	6	17147751	17160152
Gm15581	ENSMUSG00000085264	6	17156823	17335604
Gm13898	ENSMUSG00000086409	6	17660598	17661225
Gm13899	ENSMUSG00000081077	6	17661687	17662941
Gm15593	ENSMUSG00000084203	6	18094734	18095741
Gm15596	ENSMUSG00000082289	6	18106337	18107120
Gm15592	ENSMUSG00000087389	6	18220136	18239048
Gm15595	ENSMUSG00000080767	6	18244271	18245231
Gm15594	ENSMUSG00000084947	6	18374684	18377885
Gm5874	ENSMUSG00000071568	6	18774552	18775058
Gm16854	ENSMUSG00000085607	6	18794220	18797360
U6	ENSMUSG00000064965	6	17386306	17386412
AC027654.1	ENSMUSG00000093271	6	18399271	18399340
U6	ENSMUSG00000065051	6	18677292	18677398
7SK	ENSMUSG00000084650	6	18996837	18997151
7SK	ENSMUSG00000088880	6	19291329	19291586
U6	ENSMUSG00000065702	6	19574609	19574715
Chl1	ENSMUSG00000030077	6	103460870	103699671
Cntn6	ENSMUSG00000030092	6	104442784	104813400
U7	ENSMUSG00000088265	6	103538698	103538759
U7	ENSMUSG00000089091	6	103782507	103782572
SNORA48	ENSMUSG00000089587	6	105182599	105182737
Gm15631	ENSMUSG00000085067	6	105624749	105627575
Cntn4	ENSMUSG00000064293	6	105627654	106649304
Il5ra	ENSMUSG00000005364	6	106660378	106695103
Trnt1	ENSMUSG00000013736	6	106719114	106732468
Crbn	ENSMUSG00000005362	6	106728243	106750068
U6	ENSMUSG00000064466	6	106951446	106951552
Fank1	ENSMUSG00000053111	7	140968544	141073215
Adam12	ENSMUSG00000054555	7	141074882	141423829
D7Ertd443e	ENSMUSG00000030994	7	141457945	141577344
Dock1	ENSMUSG00000058325	7	141862370	142365322
Fam196a	ENSMUSG00000073805	7	142073609	142130113
Nps	ENSMUSG00000073804	7	142460302	142464625
4930544L04Rik	ENSMUSG00000073803	7	142588025	142591227
Foxi2	ENSMUSG00000048377	7	142602050	142605298
Clrn3	ENSMUSG00000050866	7	142703149	142720337
Ptpre	ENSMUSG00000041836	7	142729507	142877977
5830432E09Rik	ENSMUSG00000086609	7	142827614	142843997
A130023I24Rik	ENSMUSG00000050066	7	141419157	141422388
Mki67	ENSMUSG00000031004	7	142881471	142908062
Mir1962	ENSMUSG00000088141	7	142757845	142757965
SNORA17	ENSMUSG00000077150	7	142323197	142323329
AC125372.1	ENSMUSG00000093032	7	141131302	141131424
Mgmt	ENSMUSG00000054612	7	144086294	144319870
Ebf3	ENSMUSG00000010476	7	144385356	144506128
9430038I01Rik	ENSMUSG00000040139	7	144567257	144602445
Glrx3	ENSMUSG00000031068	7	144629331	144660277
7SK	ENSMUSG00000087869	7	143700709	143701016
Gm4459	ENSMUSG00000083626	7	146845587	146846054
Gm16201	ENSMUSG00000086742	7	147136295	147164876
Gm2044	ENSMUSG00000085354	7	147142904	147143938
Mapk1ip1	ENSMUSG00000041775	7	146027506	146037956
Ppp2r2d	ENSMUSG00000041769	7	146037762	146074740
Bnip3	ENSMUSG00000078566	7	146082519	146101202
Jakmip3	ENSMUSG00000056856	7	146132413	146269875
Dpysl4	ENSMUSG00000025478	7	146271900	146288603
Stk32c	ENSMUSG00000015981	7	146289537	146399206
Lrrc27	ENSMUSG00000015980	7	146398887	146428878
Pwwp2b	ENSMUSG00000060260	7	146434381	146453152
Inpp5a	ENSMUSG00000025477	7	146575008	146765551
Nkx6-2	ENSMUSG00000041309	7	146765276	146768696
E030019B06Rik	ENSMUSG00000070357	7	146786979	146802208
9330101J02Rik	ENSMUSG00000049571	7	146824677	146869716
Rpl21-ps13	ENSMUSG00000056777	7	146905298	146905780
Gpr123	ENSMUSG00000025475	7	147020073	147063987
Kndc1	ENSMUSG00000066129	7	147080595	147127436
Utf1	ENSMUSG00000047751	7	147129688	147131011
6430531B16Rik	ENSMUSG00000073795	7	147158202	147164654
Adam8	ENSMUSG00000025473	7	147164831	147178461
Tubgcp2	ENSMUSG00000025474	7	147181854	147222289
Zfp511	ENSMUSG00000025470	7	147222290	147226504
Msx3	ENSMUSG00000025469	7	147232056	147235039
Caly	ENSMUSG00000025468	7	147255786	147268447
Prap1	ENSMUSG00000025467	7	147279294	147283099
1810014F10Rik	ENSMUSG00000025466	7	147282669	147288340
Echs1	ENSMUSG00000025465	7	147291609	147302375
Paox	ENSMUSG00000025464	7	147311556	147320233
Mtg1	ENSMUSG00000039018	7	147323463	147336685
Sprn	ENSMUSG00000045733	7	147336527	147340776
Olfr522	ENSMUSG00000051180	7	147347838	147348913
Olfr523	ENSMUSG00000051051	7	147361960	147363015
Olfr524	ENSMUSG00000050366	7	147387642	147388699
Cd163l1	ENSMUSG00000025461	7	147404166	147417044
5830411N06Rik	ENSMUSG00000054672	7	147433200	147485690
Olfr525	ENSMUSG00000061489	7	147508501	147509550
Olfr527	ENSMUSG00000062782	7	147521742	147522719
Olfr60	ENSMUSG00000060112	7	147530951	147531886
Olfr530	ENSMUSG00000060974	7	147558486	147559565
Olfr531	ENSMUSG00000062712	7	147586029	147586943
Olfr532	ENSMUSG00000063823	7	147604741	147605670
Olfr533	ENSMUSG00000056883	7	147652057	147653108
Mir202	ENSMUSG00000065502	7	147143588	147143659
Olfr535	ENSMUSG00000063230	7	147678516	147679506
Olfr536	ENSMUSG00000052508	7	147686755	147693217
Olfr538	ENSMUSG00000066125	7	147760030	147760986
Olfr46	ENSMUSG00000063437	7	147796067	147797023
Olfr61	ENSMUSG00000066124	7	147823506	147824601
Olfr53	ENSMUSG00000066123	7	147837857	147838858
Olfr539	ENSMUSG00000059136	7	147853188	147854147
Olfr45	ENSMUSG00000066122	7	147876783	147877817
Olfr541	ENSMUSG00000057997	7	147890064	147891166
Cyp2e1	ENSMUSG00000025479	7	147949638	147960874
Syce1	ENSMUSG00000025480	7	147963128	147973753
Zfp941	ENSMUSG00000060314	7	147993348	148008077
Chd9	ENSMUSG00000056608	8	93352734	93578407
Gm6658	ENSMUSG00000074171	8	93431838	93432314
Rbl2	ENSMUSG00000031666	8	93593956	93647743
Aktip	ENSMUSG00000031667	8	93635940	93658364
Rpgrip1l	ENSMUSG00000033282	8	93740929	93837161
Fto	ENSMUSG00000055932	8	93837431	94192338
Irx3	ENSMUSG00000031734	8	94322424	94325966
4933436C20Rik	ENSMUSG00000031736	8	94849937	94880019
Irx5	ENSMUSG00000031737	8	94881695	94885353
Gm3235	ENSMUSG00000090778	8	94145347	94153628
D230002A01Rik	ENSMUSG00000046413	8	94324314	94331438
U6	ENSMUSG00000065636	8	94563816	94563919
SNORA17	ENSMUSG00000089179	8	93585164	93585295
7SK	ENSMUSG00000089148	8	93708818	93709082
Irx6	ENSMUSG00000031738	8	95198188	95204855
Gm3272	ENSMUSG00000078967	8	95239646	95240874
Gm17310	ENSMUSG00000091112	8	95343904	95344046
Mmp2	ENSMUSG00000031740	8	95351227	95377316
Lpcat2	ENSMUSG00000033192	8	95379249	95443178
Capns2	ENSMUSG00000078144	8	95425306	95426306
Slc6a2	ENSMUSG00000055368	8	95483978	95525566
Ces1a	ENSMUSG00000071047	8	95544113	95572091
Ces1b	ENSMUSG00000078964	8	95580626	95603916
Ces1c	ENSMUSG00000057400	8	95622914	95655182
Ces1d	ENSMUSG00000056973	8	95689967	95721737
Ces1e	ENSMUSG00000061959	8	95725117	95753518
Ces1f	ENSMUSG00000031725	8	95780135	95803646
AC121604.1	ENSMUSG00000080613	8	95437031	95437088
Ces1g	ENSMUSG00000057074	8	95826268	95861207
Ces1h	ENSMUSG00000074156	8	95875741	95903624
Ces5a	ENSMUSG00000058346	8	96008588	96015891
Fam192a	ENSMUSG00000031774	8	97098843	97125626
Rspry1	ENSMUSG00000050079	8	97125855	97184175
Arl2bp	ENSMUSG00000031776	8	97190550	97198327
Pllp	ENSMUSG00000031775	8	97198795	97220142
Ccl22	ENSMUSG00000031779	8	97269490	97275599
Cx3cl1	ENSMUSG00000031778	8	97295909	97306323
Ccl17	ENSMUSG00000031780	8	97334353	97335935
Ciapin1	ENSMUSG00000031781	8	97343718	97362258
Coq9	ENSMUSG00000031782	8	97362221	97378795
Polr2c	ENSMUSG00000031783	8	97381350	97397435
Dok4	ENSMUSG00000040631	8	97387728	97400212
Ccdc102a	ENSMUSG00000063605	8	97426769	97441998
Gpr114	ENSMUSG00000061577	8	97447594	97467190
Gpr56	ENSMUSG00000031785	8	97508503	97538090
Gpr97	ENSMUSG00000060470	8	97541592	97569147
Ccdc135	ENSMUSG00000031786	8	97579003	97602041
Katnb1	ENSMUSG00000031787	8	97605101	97623774
Kifc3	ENSMUSG00000031788	8	97623732	97666440
Cngb1	ENSMUSG00000031789	8	97762945	97808081
BC016201	ENSMUSG00000058253	8	97814493	97830485
Tepp	ENSMUSG00000090206	8	97834466	97850223
Zfp319	ENSMUSG00000074140	8	97846914	97849163
Zfp319	ENSMUSG00000046556	8	97850037	97855850
AA960436	ENSMUSG00000031792	8	97856192	97871407
Mmp15	ENSMUSG00000031790	8	97876168	97898193
Gtl3	ENSMUSG00000031796	8	97944152	97958769
Csnk2a2	ENSMUSG00000046707	8	97969996	98012727
Ccdc113	ENSMUSG00000036598	8	98058000	98082788
Prss54	ENSMUSG00000048400	8	98083033	98099355
Gins3	ENSMUSG00000031669	8	98157459	98168959
Ndrg4	ENSMUSG00000036564	8	98200880	98239019
Setd6	ENSMUSG00000031671	8	98239815	98242910
Cnot1	ENSMUSG00000036550	8	98243351	98331366
Gm10094	ENSMUSG00000061104	8	98349254	98350033
Slc38a7	ENSMUSG00000036534	8	98359820	98377439
Got2	ENSMUSG00000031672	8	98388034	98412447
1700047G07Rik	ENSMUSG00000053206	8	99036240	99037431
Gm7418	ENSMUSG00000090188	8	97359617	97360417
Gm10286	ENSMUSG00000070111	8	97488579	97493656
Gm5912	ENSMUSG00000081436	8	98101371	98102808
4930513N10Rik	ENSMUSG00000074136	8	98330730	98345628
SNORA46	ENSMUSG00000065089	8	98269960	98270095
7SK	ENSMUSG00000088331	8	97221916	97222185
SNORA76	ENSMUSG00000065211	8	98280850	98280984
SNORA7	ENSMUSG00000087705	8	97523005	97523118
SNORA17	ENSMUSG00000077272	8	98842387	98842518
Mir1186b	ENSMUSG00000093084	8	98487444	98487507
Gm15520	ENSMUSG00000085449	9	28867384	28877784
Gm15521	ENSMUSG00000085638	9	29398069	29400095
Opcml	ENSMUSG00000062257	9	27598360	28732995
Ntm	ENSMUSG00000059974	9	28802335	29770726
7SK	ENSMUSG00000088881	9	29069998	29070200
U6	ENSMUSG00000064713	9	30099453	30099559
Gm10698	ENSMUSG00000079884	9	33535831	33536436
Arhgap32	ENSMUSG00000041444	9	31923721	32076031
Kcnj5	ENSMUSG00000032034	9	32122368	32151822
Kcnj1	ENSMUSG00000041248	9	32180003	32206777
Fli1	ENSMUSG00000016087	9	32229793	32348974
Ets1	ENSMUSG00000032035	9	32443806	32565405
U6	ENSMUSG00000064492	9	32254407	32254513
SNORA17	ENSMUSG00000088905	9	33725077	33725207
A130066N16Rik	ENSMUSG00000053889	9	34725818	34737094
4930581F22Rik	ENSMUSG00000070315	9	34924313	34938507
Gm6762	ENSMUSG00000086984	9	35381221	35382248
Kirrel3	ENSMUSG00000032036	9	34293711	34844301
St3gal4	ENSMUSG00000032038	9	34854164	34924395
Dcps	ENSMUSG00000032040	9	34931993	34983646
Tirap	ENSMUSG00000032041	9	34992136	35007876
Srpr	ENSMUSG00000032042	9	35007760	35055558
Foxred1	ENSMUSG00000039048	9	35011791	35018640
Fam118b	ENSMUSG00000050471	9	35024550	35075390
Rpusd4	ENSMUSG00000032044	9	35075450	35085316
Gm5614	ENSMUSG00000066771	9	35089103	35089420
Cdon	ENSMUSG00000038119	9	35228713	35315236
Ddx25	ENSMUSG00000032101	9	35349433	35366055
Pus3	ENSMUSG00000032103	9	35366180	35374768
Hyls1	ENSMUSG00000050555	9	35368405	35377688
Pate2	ENSMUSG00000074452	9	35377869	35497903
Gm17346	ENSMUSG00000091603	9	34396111	34396889
U1	ENSMUSG00000065934	9	35282470	35282631
5S_rRNA	ENSMUSG00000088605	9	35311173	35311280
5S_rRNA	ENSMUSG00000089465	9	34767604	34767733
SNORA48	ENSMUSG00000088056	9	34952221	34952364
Gm10105	ENSMUSG00000061932	9	35396663	35396935
Pate4	ENSMUSG00000032099	9	35414678	35419520
Gm17365	ENSMUSG00000090858	9	35453647	35455704
Gm17252	ENSMUSG00000091215	9	35492664	35494956
Gm17677	ENSMUSG00000091174	9	35548634	35549837
Gm17727	ENSMUSG00000090738	9	35584198	35585470
D730048I06Rik	ENSMUSG00000032108	9	35585618	35597697
9230110F15Rik	ENSMUSG00000047980	9	35645914	35651735
9230113P08Rik	ENSMUSG00000078934	9	35716008	35718381
Gm16214	ENSMUSG00000086360	9	41830698	41842196
Gm16322	ENSMUSG00000087456	9	42282638	42313745
2610203C20Rik	ENSMUSG00000074415	9	41388824	41400910
Sorl1	ENSMUSG00000049313	9	41772803	41932380
Sc5d	ENSMUSG00000032018	9	42062260	42072383
Tecta	ENSMUSG00000037705	9	42137702	42208012
Tbcel	ENSMUSG00000037287	9	42220399	42315892
Grik4	ENSMUSG00000032017	9	42326218	42752576
9530085L02Rik	ENSMUSG00000091403	9	42416941	42421150
Arhgef12	ENSMUSG00000059495	9	42771925	42913801
Tmem136	ENSMUSG00000048503	9	42916736	42924653
Pou2f3	ENSMUSG00000032015	9	42930711	43018452
Oaf	ENSMUSG00000032014	9	43029361	43047899
Trim29	ENSMUSG00000032013	9	43118846	43144208
D230004N17Rik	ENSMUSG00000087130	9	41283020	41423263
Mir100	ENSMUSG00000093011	9	41339508	41339587
AC136903.1	ENSMUSG00000093745	9	42328856	42328914
Mirlet7a-2	ENSMUSG00000092770	9	41344799	41344894
Mir125b-1	ENSMUSG00000093354	9	41390009	41390085
SNORA17	ENSMUSG00000077512	9	42125633	42125764
Gm20444	ENSMUSG00000092258	9	43915384	43917043
Gm10080	ENSMUSG00000060467	9	44182824	44183278
C030014I23Rik	ENSMUSG00000060380	9	44286007	44290263
Pvrl1	ENSMUSG00000032012	9	43552659	43615537
Thy1	ENSMUSG00000032011	9	43851467	43856662
Rnf26	ENSMUSG00000053128	9	43874410	43921600
Usp2	ENSMUSG00000032010	9	43875104	43903710
Mfrp	ENSMUSG00000034739	9	43909821	43917270
C1qtnf5	ENSMUSG00000079592	9	43915328	43917270
Mcam	ENSMUSG00000032135	9	43942552	43950810
Cbl	ENSMUSG00000034342	9	43957345	44042129
Ccdc153	ENSMUSG00000070306	9	44048760	44055389
Pdzd3	ENSMUSG00000032105	9	44055395	44059547
Nlrx1	ENSMUSG00000032109	9	44060796	44076682
Abcg4	ENSMUSG00000032131	9	44081271	44096698
Hinfp	ENSMUSG00000032119	9	44103756	44113754
C2cd2l	ENSMUSG00000032120	9	44117320	44128365
Dpagt1	ENSMUSG00000032123	9	44134928	44141683
H2afx	ENSMUSG00000049932	9	44142798	44144154
Hmbs	ENSMUSG00000032126	9	44144433	44152311
Vps11	ENSMUSG00000032127	9	44156189	44169753
Hyou1	ENSMUSG00000032115	9	44187573	44200452
Slc37a4	ENSMUSG00000032114	9	44205182	44211046
Trappc4	ENSMUSG00000032112	9	44211844	44215631
Rps25	ENSMUSG00000009927	9	44215797	44218488
Ccdc84	ENSMUSG00000043923	9	44218249	44226090
Foxr1	ENSMUSG00000074397	9	44241438	44248951
Upk2	ENSMUSG00000041523	9	44260799	44262850
Gm9830	ENSMUSG00000048648	9	44272240	44273615
Bcl9l	ENSMUSG00000063382	9	44307219	44318471
Cxcr5	ENSMUSG00000047880	9	44319871	44334504
Ddx6	ENSMUSG00000032097	9	44412975	44448814
Treh	ENSMUSG00000032098	9	44481316	44494388
Ift46	ENSMUSG00000002031	9	44575991	44600797
Gm3906	ENSMUSG00000092003	9	43921006	43930030
Gm10687	ENSMUSG00000074408	9	43931851	43942568
Tmem25	ENSMUSG00000002032	9	44601858	44607390
Ttc36	ENSMUSG00000039438	9	44607483	44611034
Mll1	ENSMUSG00000002028	9	44611438	44689379
Arcn1	ENSMUSG00000032096	9	44549647	44575928
Phldb1	ENSMUSG00000048537	9	44494387	44543281
U6	ENSMUSG00000088044	9	43713981	43714085
7SK	ENSMUSG00000088028	9	44171535	44171811
U6	ENSMUSG00000088793	9	44284499	44284615
SNORA40	ENSMUSG00000088398	9	44203880	44203998
SNORA2	ENSMUSG00000064658	9	44544896	44545030
U6atac	ENSMUSG00000080358	9	44705948	44706065
Amica1	ENSMUSG00000048534	9	44887266	44916613
Gm10684	ENSMUSG00000074385	9	44915259	44943689
Scn2b	ENSMUSG00000070304	9	44925959	44938153
Scn4b	ENSMUSG00000046480	9	44946520	44962235
Tmprss4	ENSMUSG00000032091	9	44980809	45012175
BC049352	ENSMUSG00000091996	9	44990090	45058103
Il10ra	ENSMUSG00000032089	9	45061920	45077232
Tmprss13	ENSMUSG00000037129	9	45127183	45155664
Fxyd6	ENSMUSG00000066705	9	45178268	45204241
Fxyd2	ENSMUSG00000059412	9	45207957	45218361
Dscaml1	ENSMUSG00000032087	9	45235288	45561343
Cep164	ENSMUSG00000043987	9	45575029	45636774
Bace1	ENSMUSG00000032086	9	45646663	45672482
Rnf214	ENSMUSG00000042790	9	45670496	45714977
Pcsk7	ENSMUSG00000035382	9	45714652	45737775
Tagln	ENSMUSG00000032085	9	45737711	45744141
Sidt2	ENSMUSG00000034908	9	45745940	45763330
Pafah1b2	ENSMUSG00000003131	9	45773394	45792954
Sik3	ENSMUSG00000034135	9	45820903	46032277
Apoa1	ENSMUSG00000032083	9	46036663	46038549
Apoc3	ENSMUSG00000032081	9	46041016	46043719
Apoa4	ENSMUSG00000032080	9	46048779	46051542
Apoa5	ENSMUSG00000032079	9	46076716	46080002
Zfp259	ENSMUSG00000032078	9	46081147	46090726
Bud13	ENSMUSG00000032077	9	46091091	46106866
4931429L15Rik	ENSMUSG00000056617	9	46111444	46128069
Gm17099	ENSMUSG00000091659	9	44981080	44983244
RP24-166B2.4	ENSMUSG00000093722	9	45069138	45069373
1700003G13Rik	ENSMUSG00000085831	9	45126348	45130162
Gm16536	ENSMUSG00000089810	9	45664852	45666440
Gm10680	ENSMUSG00000074373	9	46050704	46051612
4833428L15Rik	ENSMUSG00000086990	9	45224709	45239315
4930448E22Rik	ENSMUSG00000090668	9	46134474	46137496
Cd3g	ENSMUSG00000002033	9	44777655	44788514
Cd3d	ENSMUSG00000032094	9	44789876	44795135
Cd3e	ENSMUSG00000032093	9	44806826	44817673
Mpzl2	ENSMUSG00000032092	9	44850508	44862098
Mpzl3	ENSMUSG00000070305	9	44863269	44885519
Atp5l	ENSMUSG00000038717	9	44721333	44728825
Ube4a	ENSMUSG00000059890	9	44731214	44773683
SNORA17	ENSMUSG00000077383	9	46371057	46371186
U6	ENSMUSG00000087734	9	45687633	45687731
U6	ENSMUSG00000064835	9	45442789	45442895
U6	ENSMUSG00000064673	9	46438196	46438302
Gm10653	ENSMUSG00000074250	9	62689284	62715807
Gm16759	ENSMUSG00000086539	9	63247188	63416498
Gm6257	ENSMUSG00000091866	9	63290973	63291882
Rplp1	ENSMUSG00000007892	9	61761091	61762345
Kif23	ENSMUSG00000032254	9	61765087	61794606
Paqr5	ENSMUSG00000032278	9	61801288	61874663
Glce	ENSMUSG00000032252	9	61905055	61918413
Spesp1	ENSMUSG00000046846	9	62118536	62129986
Anp32a	ENSMUSG00000032249	9	62189100	62226619
Coro2b	ENSMUSG00000041729	9	62267299	62384851
Itga11	ENSMUSG00000032243	9	62525633	62631789
Fem1b	ENSMUSG00000032244	9	62639639	62659455
Cln6	ENSMUSG00000032245	9	62686592	62699813
Calml4	ENSMUSG00000032246	9	62705911	62723725
Pias1	ENSMUSG00000032405	9	62727884	62828690
Skor1	ENSMUSG00000022245	9	62985977	62996768
Map2k5	ENSMUSG00000058444	9	63011576	63225659
2300009A05Rik	ENSMUSG00000032403	9	63242254	63247051
Iqch	ENSMUSG00000037801	9	63269262	63450300
Gm17400	ENSMUSG00000090402	9	62652285	62656041
U6	ENSMUSG00000064559	9	62981090	62981196
AC122057.1	ENSMUSG00000093137	9	63290126	63290267
Mir5133	ENSMUSG00000092696	9	61970325	61970401
n-R5s84	ENSMUSG00000084540	9	62362836	62362944
U1	ENSMUSG00000064855	9	62875367	62875524
7SK	ENSMUSG00000088743	9	61868401	61868493
AC113291.1	ENSMUSG00000088986	9	62090570	62090674
4930429F24Rik	ENSMUSG00000086918	9	79641448	79651042
Gm20477	ENSMUSG00000092565	9	79685915	79686194
Gm3211	ENSMUSG00000092581	9	79761007	79761438
RP24-63G9.3	ENSMUSG00000093779	9	79921236	79921563
Gm17477	ENSMUSG00000084917	9	79966702	79969744
Col12a1	ENSMUSG00000032332	9	79446798	79566638
Cox7a2	ENSMUSG00000032330	9	79603048	79607660
Tmem30a	ENSMUSG00000032328	9	79616750	79641314
Filip1	ENSMUSG00000034898	9	79662858	79825611
Senp6	ENSMUSG00000034252	9	79914710	79992760
Myo6	ENSMUSG00000033577	9	80012838	80159536
Impg1	ENSMUSG00000032343	9	80161137	80359045
Htr1b	ENSMUSG00000049511	9	81524950	81526222
Gm17255	ENSMUSG00000090679	9	80849043	81097197
D430036J16Rik	ENSMUSG00000085832	9	81525158	81538763
7SK	ENSMUSG00000088908	9	79885236	79885521
Gm9531	ENSMUSG00000079225	9	81571219	81572101
Gm15896	ENSMUSG00000081273	9	82096255	82097005
Mei4	ENSMUSG00000043289	9	81757277	82099614
Gm16875	ENSMUSG00000087423	9	81670302	81757503
U6	ENSMUSG00000088760	9	82356963	82357059
SNORA17	ENSMUSG00000077415	9	82141455	82141585
U7	ENSMUSG00000089066	9	82333021	82333081
Irak1bp1	ENSMUSG00000032251	9	82723413	82741295
Phip	ENSMUSG00000032253	9	82759766	82869096
Hmgn3	ENSMUSG00000066456	9	83003555	83040292
Lca5	ENSMUSG00000032258	9	83283900	83334734
Lca5	ENSMUSG00000090403	9	83284216	83286185
Gm17498	ENSMUSG00000092026	9	83303183	83303530
Rps27a-ps2	ENSMUSG00000058838	9	83303245	83303770
Sh3bgrl2	ENSMUSG00000032261	9	83441934	83532408
Elovl4	ENSMUSG00000032262	9	83672300	83699912
Ttk	ENSMUSG00000038379	9	83728296	83765997
Gm5919	ENSMUSG00000090522	9	83775821	83779657
Bckdhb	ENSMUSG00000032263	9	83818757	84017846
U6	ENSMUSG00000064469	9	83831976	83832082
U1	ENSMUSG00000077666	9	84081962	84082146
Gm8226	ENSMUSG00000066452	9	84317582	84318433
U1	ENSMUSG00000065122	9	84543103	84543266
Gm11114	ENSMUSG00000079433	9	85206380	85206467
Fam46a	ENSMUSG00000032265	9	85214046	85220731
SNORA42	ENSMUSG00000065274	9	85366341	85366476
Ibtk	ENSMUSG00000035941	9	85580963	85642830
Gm5619	ENSMUSG00000062358	9	85675425	85676279
SNORA61	ENSMUSG00000065706	9	85665958	85666087
9330154J02Rik	ENSMUSG00000056031	9	85713848	85736892
Tpbg	ENSMUSG00000035274	9	85735987	85740662
Gm16262	ENSMUSG00000089709	9	94596123	94602738
Gm16126	ENSMUSG00000086585	9	95519330	95548890
Gm16127	ENSMUSG00000086248	9	95537391	95538684
1190002N15Rik	ENSMUSG00000045414	9	94418283	94438500
Slc9a9	ENSMUSG00000031129	9	94570328	95130864
Chst2	ENSMUSG00000033350	9	95301348	95307689
2610101N10Rik	ENSMUSG00000032407	9	95357313	95412415
Paqr9	ENSMUSG00000064225	9	95460236	95462540
Pcolce2	ENSMUSG00000015354	9	95538020	95598515
U1	ENSMUSG00000064889	9	94179334	94179490
SNORA4	ENSMUSG00000065346	9	95524921	95525030
U6	ENSMUSG00000089551	9	94544438	94544533
Rasa2	ENSMUSG00000032413	9	96439719	96532036
Zbtb38	ENSMUSG00000040433	9	96583182	96653250
E030011O05Rik	ENSMUSG00000048790	9	96647700	96653146
Acpl2	ENSMUSG00000043587	9	96723763	96793088
Gm10123	ENSMUSG00000062933	9	96796033	96796754
Spsb4	ENSMUSG00000046997	9	96843901	96919262
Slc25a36	ENSMUSG00000032449	9	96976016	97011576
Rpl7a-ps10	ENSMUSG00000070289	9	97079575	97080440
Trim42	ENSMUSG00000032451	9	97249981	97270377
Clstn2	ENSMUSG00000032452	9	97344814	97933600
1700065D16Rik	ENSMUSG00000051368	9	95757820	95758288
Gm16010	ENSMUSG00000085541	9	96916385	96922462
Gm16185	ENSMUSG00000084911	9	96985745	96989029
Gm15891	ENSMUSG00000087167	9	97250035	97270364
Pls1	ENSMUSG00000049493	9	95653061	95745730
Atr	ENSMUSG00000032409	9	95758016	95852063
Gm16794	ENSMUSG00000086393	9	95842468	95859812
Gm17254	ENSMUSG00000091219	9	96968602	96973848
Tfdp2	ENSMUSG00000032411	9	96096694	96224065
Atp1b3	ENSMUSG00000032412	9	96233099	96264766
Gm17562	ENSMUSG00000090915	9	96255023	96255119
BC043934	ENSMUSG00000056418	9	96336203	96337853
Rnf7	ENSMUSG00000051234	9	96371360	96379094
Xrn1	ENSMUSG00000032410	9	95855179	95953446
Gk5	ENSMUSG00000041440	9	96019781	96085046
n-R5s87	ENSMUSG00000084701	9	96450013	96450128
U1	ENSMUSG00000089085	9	95835032	95835209
SNORA17	ENSMUSG00000077208	9	97339920	97340046
4921534H16Rik	ENSMUSG00000090255	9	97903839	97912594
2610303G11Rik	ENSMUSG00000046995	9	98086946	98087571
Nmnat3	ENSMUSG00000032456	9	98187854	98320946
Rbp1	ENSMUSG00000046402	9	98323380	98346970
Rbp2	ENSMUSG00000032454	9	98390956	98410190
4930579K19Rik	ENSMUSG00000051074	9	98463379	98464030
Copb2	ENSMUSG00000032458	9	98464150	98488794
Mrps22	ENSMUSG00000032459	9	98489152	98502098
Prr23a	ENSMUSG00000091080	9	98743006	98744064
Gm6406	ENSMUSG00000063058	9	98757010	98757771
2410012M07Rik	ENSMUSG00000090470	9	98765186	98766999
7420426K07Rik	ENSMUSG00000074123	9	98803538	98805041
Foxl2	ENSMUSG00000050397	9	98856026	98858545
Foxl2os	ENSMUSG00000074122	9	98849574	98855729
Faim	ENSMUSG00000032463	9	98886792	98902437
Gm1123	ENSMUSG00000044860	9	98907384	98936109
Pik3cb	ENSMUSG00000032462	9	98938821	99041040
Cep70	ENSMUSG00000056267	9	99143887	99200820
Esyt3	ENSMUSG00000037681	9	99210386	99258949
Mras	ENSMUSG00000032470	9	99285841	99337300
1600029I14Rik	ENSMUSG00000046242	9	99356662	99375369
Armc8	ENSMUSG00000032468	9	99378810	99469318
Dbr1	ENSMUSG00000032469	9	99476218	99484882
A4gnt	ENSMUSG00000037953	9	99512921	99522786
Dzip1l	ENSMUSG00000037784	9	99529915	99569675
Cldn18	ENSMUSG00000032473	9	99589880	99617686
Sox14	ENSMUSG00000053747	9	99774644	99776663
Gm16004	ENSMUSG00000089655	9	99608818	99656462
SNORA17	ENSMUSG00000077215	9	99650810	99650936
SNORA17	ENSMUSG00000077495	9	99844128	99844261
Il20rb	ENSMUSG00000044244	9	100358138	100387207
Nck1	ENSMUSG00000032475	9	100392712	100446472
Tmem22	ENSMUSG00000070287	9	100452612	100471504
Stag1	ENSMUSG00000037286	9	100498217	100858964
Gm8661	ENSMUSG00000086225	9	100525393	100526384
Pccb	ENSMUSG00000032527	9	100882451	100935317
Msl2	ENSMUSG00000066415	9	100978451	101007114
Ppp2r3a	ENSMUSG00000043154	9	101007322	101154162
Ephb1	ENSMUSG00000032537	9	101824458	102257023
9630041A04Rik	ENSMUSG00000057710	9	101840811	101845549
Gm5161	ENSMUSG00000061486	9	101350827	101351684
n-R5s88	ENSMUSG00000065107	9	102030218	102030335
SNORA24	ENSMUSG00000077393	9	101125282	101125408
SNORA17	ENSMUSG00000077245	9	101295309	101295440
Ky	ENSMUSG00000035606	9	102408078	102448568
Gm17708	ENSMUSG00000091959	9	102248233	102257024
U6	ENSMUSG00000088138	9	102275448	102275550
2310075C17Rik	ENSMUSG00000089718	9	112130083	112130746
2900079G21Rik	ENSMUSG00000087038	9	112136781	112251429
Prss50	ENSMUSG00000048752	9	110760471	110767132
Tmie	ENSMUSG00000049555	9	110768215	110782617
Als2cl	ENSMUSG00000044037	9	110782374	110803034
Tdgf1	ENSMUSG00000032494	9	110842114	110848662
Lrrc2	ENSMUSG00000032495	9	110854049	110886570
Rtp3	ENSMUSG00000066319	9	110887449	110892217
Gm10030	ENSMUSG00000057802	9	110907315	110909334
Ltf	ENSMUSG00000032496	9	110921796	110945270
Ccrl2	ENSMUSG00000043953	9	110957339	110959774
Lrrfip2	ENSMUSG00000032497	9	111020615	111128172
Mlh1	ENSMUSG00000032498	9	111130732	111174112
Epm2aip1	ENSMUSG00000046785	9	111174349	111181593
Trank1	ENSMUSG00000062296	9	111214243	111298278
Dclk3	ENSMUSG00000032500	9	111341585	111392115
Stac	ENSMUSG00000032502	9	111463941	111592852
Arpp21	ENSMUSG00000032503	9	111967595	112138442
SNORA17	ENSMUSG00000077751	9	112425033	112425164
Mir128-2	ENSMUSG00000065441	9	112021136	112021219
n-R5s90	ENSMUSG00000077156	9	111516402	111516519
7SK	ENSMUSG00000089082	9	111147096	111147371
U7	ENSMUSG00000088296	9	110977898	110977960
Gm18489	ENSMUSG00000092184	9	116968276	116968826
Gm20397	ENSMUSG00000092516	9	116974645	116975006
Gm17396	ENSMUSG00000079669	9	117161654	117163814
Gm20396	ENSMUSG00000092504	9	117312097	117313460
Rbms3	ENSMUSG00000039607	9	116481864	117539031
Gm16977	ENSMUSG00000085506	9	117782262	117790320
Gm17399	ENSMUSG00000092135	9	118059349	118079494
Golga4	ENSMUSG00000038708	9	118415393	118491640
Zcwpw2	ENSMUSG00000032443	9	117856918	117923278
Azi2	ENSMUSG00000039285	9	117949617	117978912
Cmc1	ENSMUSG00000039163	9	117974213	118059198
Eomes	ENSMUSG00000032446	9	118387330	118395250
Itga9	ENSMUSG00000039115	9	118515808	118810121
U4	ENSMUSG00000084515	9	118376102	118376182
7SK	ENSMUSG00000084608	9	118196904	118197210
AC157475.1	ENSMUSG00000078044	9	117908454	117908548
Gm10157	ENSMUSG00000066270	9	118746731	118747073
Gm2415	ENSMUSG00000086119	9	118799193	118835387
Gm16295	ENSMUSG00000087041	9	118833991	118834895
Ctdspl	ENSMUSG00000047409	9	118835571	118953116
Dlec1	ENSMUSG00000038060	9	119011596	119057364
Acaa1b	ENSMUSG00000010651	9	119057141	119066211
Gm10608	ENSMUSG00000074029	9	119068279	119070787
Slc22a14	ENSMUSG00000070280	9	119078573	119099525
Plcd1	ENSMUSG00000010660	9	118980645	119002614
Vill	ENSMUSG00000038775	9	118961896	118980643
Slc22a13	ENSMUSG00000074028	9	119102120	119118223
Mir26a-1	ENSMUSG00000065513	9	118940914	118941003
Oxsr1	ENSMUSG00000036737	9	119147550	119231545
Slc22a13b	ENSMUSG00000092212	9	119129606	119140810
SNORA19	ENSMUSG00000088713	9	119215747	119215875
Myd88	ENSMUSG00000032508	9	119245052	119250529
Acaa1a	ENSMUSG00000036138	9	119248794	119259417
Xylb	ENSMUSG00000035769	9	119266499	119302438
Acvr2b	ENSMUSG00000061393	9	119311562	119342619
Exog	ENSMUSG00000042787	9	119354041	119374635
Scn5a	ENSMUSG00000032511	9	119392528	119488134
Scn10a	ENSMUSG00000034533	9	119517584	119603478
Scn11a	ENSMUSG00000034115	9	119662881	119734574
Gm16707	ENSMUSG00000086780	9	119349396	119353948
Wdr48	ENSMUSG00000032512	9	119804004	119835703
Gorasp1	ENSMUSG00000032513	9	119834791	119846676
Ttc21a	ENSMUSG00000032514	9	119846724	119876911
Gm2449	ENSMUSG00000084857	9	119801821	119803981
Csrnp1	ENSMUSG00000032515	9	119880284	119886368
Xirp1	ENSMUSG00000079243	9	119922873	119932716
Cx3cr1	ENSMUSG00000052336	9	119957811	119977400
Ccr8	ENSMUSG00000042262	9	120001251	120004024
Slc25a38	ENSMUSG00000032519	9	120019492	120033622
Rpsa	ENSMUSG00000032518	9	120036884	120041487
Mobp	ENSMUSG00000032517	9	120058860	120090602
Snora62	ENSMUSG00000064925	9	120039533	120039681
SNORA62	ENSMUSG00000065041	9	120037898	120038053
SNORA73	ENSMUSG00000064380	9	120038469	120038671
Myrip	ENSMUSG00000041794	9	120213054	120383959
Gm15566	ENSMUSG00000083772	9	120225446	120226035
Gm15565	ENSMUSG00000082356	9	120294029	120294455
Eif1b	ENSMUSG00000006941	9	120401724	120404445
Entpd3	ENSMUSG00000041608	9	120448936	120477435
Rpl14	ENSMUSG00000025794	9	120480632	120483770
5830454E08Rik	ENSMUSG00000052658	9	120486463	120487189
Ctnnb1	ENSMUSG00000006932	9	120838334	120869625
4930593C16Rik	ENSMUSG00000086365	9	120833573	120839920
7SK	ENSMUSG00000064397	9	120700583	120700903
Ulk4	ENSMUSG00000040936	9	120869386	121186315
Trak1	ENSMUSG00000032536	9	121206620	121384034
Gm17157	ENSMUSG00000091336	9	121156435	121156782
7SK	ENSMUSG00000084706	9	121151460	121151705
Cck	ENSMUSG00000032532	9	121398943	121404807
Lyzl4	ENSMUSG00000032530	9	121486961	121551214
Vipr1	ENSMUSG00000032528	9	121551834	121582072
Sec22c	ENSMUSG00000061536	9	121589165	121614608
Deb1	ENSMUSG00000032526	9	121619507	121622039
Nktr	ENSMUSG00000032525	9	121628287	121665959
4930596M17Rik	ENSMUSG00000084995	9	121496115	121523373
AC159810.1	ENSMUSG00000093512	9	121513824	121513933
Zfp651	ENSMUSG00000013419	9	121669151	121680860
E530011L22Rik	ENSMUSG00000091138	9	121666325	121668906
Kbtbd5	ENSMUSG00000074001	9	121686725	121692937
Hhatl	ENSMUSG00000032523	9	121693134	121701625
Ccdc13	ENSMUSG00000079235	9	121706745	121748579
Gm17163	ENSMUSG00000092042	9	121729407	121740311
Higd1a	ENSMUSG00000038412	9	121757678	121767118
Ccbp2	ENSMUSG00000044534	9	121807473	121820182
Cyp8b1	ENSMUSG00000050445	9	121823474	121825423
1700048O20Rik	ENSMUSG00000043773	9	121847253	121856132
Fam198a	ENSMUSG00000038233	9	121860104	121889326
C85492	ENSMUSG00000066235	9	121890724	121905144
Snrk	ENSMUSG00000038145	9	122026401	122078820
Ano10	ENSMUSG00000037949	9	122084997	122203492
Abhd5	ENSMUSG00000032540	9	122260726	122290642
A730085K08Rik	ENSMUSG00000093598	9	122289693	122307919
Gm10606	ENSMUSG00000074000	9	122215248	122220046
9530059O14Rik	ENSMUSG00000086476	9	122481615	122588714
Stac3	ENSMUSG00000040287	10	126938742	126945879
Ndufa4l2	ENSMUSG00000040280	10	126951995	126954208
Shmt2	ENSMUSG00000025403	10	126954195	126959491
Nxph4	ENSMUSG00000040258	10	126962529	126971615
Lrp1	ENSMUSG00000040249	10	126975217	127058204
Stat6	ENSMUSG00000002147	10	127080042	127098013
Nab2	ENSMUSG00000025402	10	127097974	127105624
Tmem194	ENSMUSG00000040195	10	127103957	127138105
Myo1a	ENSMUSG00000025401	10	127142226	127157943
Tac2	ENSMUSG00000025400	10	127162448	127168823
Zbtb39	ENSMUSG00000044617	10	127176594	127184391
Gpr182	ENSMUSG00000058396	10	127184332	127188788
Rdh1	ENSMUSG00000089789	10	127196777	127205353
Rdh9	ENSMUSG00000056148	10	127196843	127229753
Rdh16	ENSMUSG00000069456	10	127238208	127283621
Rdh19	ENSMUSG00000054052	10	127286984	127298232
BC089597	ENSMUSG00000074639	10	127303530	127314373
Rdh7	ENSMUSG00000040134	10	127321084	127326095
Sdr9c7	ENSMUSG00000040127	10	127335574	127348817
Hsd17b6	ENSMUSG00000025396	10	127427997	127437734
Gm10120	ENSMUSG00000062678	10	127448832	127449188
Prim1	ENSMUSG00000025395	10	127452228	127467093
Naca	ENSMUSG00000061315	10	127472402	127485693
Ptges3	ENSMUSG00000071072	10	127496010	127514328
Baz2a	ENSMUSG00000040054	10	127496046	127566359
Atp5b	ENSMUSG00000025393	10	127520329	127527447
Rbms2	ENSMUSG00000040043	10	127566526	127617353
Gls2	ENSMUSG00000044005	10	127631513	127647060
Spryd4	ENSMUSG00000051346	10	127646964	127648850
Mip	ENSMUSG00000025389	10	127662894	127668868
Timeless	ENSMUSG00000039994	10	127669119	127689997
Apon	ENSMUSG00000051716	10	127691187	127692957
Apof	ENSMUSG00000047631	10	127705053	127707207
Stat2	ENSMUSG00000040033	10	127707629	127729905
Il23a	ENSMUSG00000025383	10	127733196	127735140
Pan2	ENSMUSG00000005682	10	127740391	127758403
Cnpy2	ENSMUSG00000025381	10	127759515	127764243
Cs	ENSMUSG00000005683	10	127774888	127799535
Coq10a	ENSMUSG00000039914	10	127800153	127807088
Ankrd52	ENSMUSG00000014498	10	127814171	127845760
Slc39a5	ENSMUSG00000039878	10	127832990	127838280
Obfc2b	ENSMUSG00000025374	10	127838451	127848548
Rnf41	ENSMUSG00000025373	10	127848672	127878494
Smarcc2	ENSMUSG00000025369	10	127896292	127927229
Myl6	ENSMUSG00000090841	10	127927916	127930931
Myl6b	ENSMUSG00000039824	10	127931213	127935741
Esyt1	ENSMUSG00000025366	10	127947304	127962926
Gm20492	ENSMUSG00000092593	10	126725570	126726737
Gm4189	ENSMUSG00000092384	10	126726752	126727844
Gm16217	ENSMUSG00000086499	10	127033604	127034926
Gm16229	ENSMUSG00000085731	10	127100895	127102540
Gm16230	ENSMUSG00000087163	10	127108660	127113780
Rdh18-ps	ENSMUSG00000054031	10	127261340	127280994
Gm15905	ENSMUSG00000085993	10	127358123	127358417
Gm15900	ENSMUSG00000090036	10	127385275	127385616
Gm17201	ENSMUSG00000090761	10	127828898	127832619
Xrcc6bp1	ENSMUSG00000025436	10	126305486	126338427
Ctdsp2	ENSMUSG00000078429	10	126415773	126437031
Gli1	ENSMUSG00000025407	10	126766945	126778645
Arhgef25	ENSMUSG00000019467	10	126619577	126627110
March9	ENSMUSG00000040502	10	126492067	126497240
Dctn2	ENSMUSG00000025410	10	126703442	126718862
Mbd6	ENSMUSG00000025409	10	126719012	126726074
Ddit3	ENSMUSG00000025408	10	126727830	126733344
F420014N23Rik	ENSMUSG00000086597	10	126632305	126639699
Gm17292	ENSMUSG00000091500	10	127667646	127669846
A430046D13Rik	ENSMUSG00000085446	10	127936420	127941298
Fam119b	ENSMUSG00000080115	10	126468238	126478569
Mettl1	ENSMUSG00000006732	10	126478470	126483421
Avil	ENSMUSG00000025432	10	126437765	126458050
Inhbe	ENSMUSG00000047492	10	126786458	126788828
Inhbc	ENSMUSG00000025405	10	126793384	126807600
Cdk4	ENSMUSG00000006728	10	126500590	126504976
Os9	ENSMUSG00000040462	10	126531315	126558216
Pip4k2c	ENSMUSG00000025417	10	126634123	126648678
Kif5a	ENSMUSG00000074657	10	126662755	126700136
Arhgap9	ENSMUSG00000040345	10	126759172	126766999
Dtx3	ENSMUSG00000040415	10	126627434	126632784
B4galnt1	ENSMUSG00000006731	10	126602247	126609385
Slc26a10	ENSMUSG00000040441	10	126608449	126617701
R3hdm2	ENSMUSG00000025404	10	126817383	126936440
Tspan31	ENSMUSG00000006736	10	126504373	126507317
Agap2	ENSMUSG00000025422	10	126515963	126530225
Cyp27b1	ENSMUSG00000006724	10	126485306	126490062
Mars	ENSMUSG00000040354	10	126733277	126748842
Tsfm	ENSMUSG00000040521	10	126448628	126467896
U8	ENSMUSG00000089313	10	127786298	127786431
Mir26a-2	ENSMUSG00000065430	10	126432586	126432669
SNORA17	ENSMUSG00000089550	10	126277431	126277557
SCARNA11	ENSMUSG00000088151	10	127872970	127873100
Mir546	ENSMUSG00000072837	10	126435496	126435616
U6atac	ENSMUSG00000088672	10	126575585	126575673
AC131120.1	ENSMUSG00000093245	10	127522345	127522416
AC090489.1	ENSMUSG00000088393	10	127814887	127814955
SNORD59	ENSMUSG00000064778	10	127521199	127521272
SNORA70	ENSMUSG00000088687	10	127390101	127390231
U6	ENSMUSG00000064948	10	127736475	127736580
U6	ENSMUSG00000089369	10	126841340	126841448
Zc3h10	ENSMUSG00000039810	10	127979019	127984830
Rpl41	ENSMUSG00000093674	10	127985170	127986361
Pa2g4	ENSMUSG00000025364	10	127994822	128002990
Erbb3	ENSMUSG00000018166	10	128004579	128026708
Gm9182	ENSMUSG00000091240	10	128052412	128053677
Rps26	ENSMUSG00000025362	10	128061586	128063562
Ikzf4	ENSMUSG00000002578	10	128067899	128083047
Suox	ENSMUSG00000049858	10	128106943	128110974
Rab5b	ENSMUSG00000000711	10	128114249	128133324
Cdk2	ENSMUSG00000025358	10	128134995	128142107
Pmel	ENSMUSG00000025359	10	128143314	128157294
Dgka	ENSMUSG00000025357	10	128157197	128181112
Wibg	ENSMUSG00000064030	10	128184935	128203617
Mmp19	ENSMUSG00000025355	10	128228009	128237880
Tmem198b	ENSMUSG00000047090	10	128237092	128241426
Dnajc14	ENSMUSG00000025354	10	128242690	128256502
Ormdl2	ENSMUSG00000025353	10	128254513	128258687
Sarnp	ENSMUSG00000078427	10	128258827	128314694
Gdf11	ENSMUSG00000025352	10	128319351	128328774
Cd63	ENSMUSG00000025351	10	128345975	128349872
Rdh5	ENSMUSG00000025350	10	128350649	128359944
Bloc1s1	ENSMUSG00000090247	10	128354938	128361091
Itga7	ENSMUSG00000025348	10	128370869	128395333
Mettl7b	ENSMUSG00000025347	10	128395333	128398044
Olfr9	ENSMUSG00000069430	10	128426905	128427956
Olfr763	ENSMUSG00000063374	10	128448278	128449321
Olfr764	ENSMUSG00000069429	10	128470925	128471854
Olfr765	ENSMUSG00000056853	10	128483188	128484117
Olfr767	ENSMUSG00000059762	10	128516028	128517113
Olfr768	ENSMUSG00000050198	10	128530090	128531028
Olfr769	ENSMUSG00000042801	10	128548484	128549567
Olfr770	ENSMUSG00000047868	10	128569887	128570822
Olfr771	ENSMUSG00000061367	10	128597085	128598038
Olfr772	ENSMUSG00000091414	10	128611107	128612110
Olfr773	ENSMUSG00000091717	10	128623507	128624510
Olfr774	ENSMUSG00000072403	10	128675207	128676145
Olfr775	ENSMUSG00000072402	10	128687592	128688530
Olfr776	ENSMUSG00000059402	10	128698019	128698957
Olfr777	ENSMUSG00000062914	10	128705442	128706377
Olfr779	ENSMUSG00000044537	10	128748565	128748954
Olfr780	ENSMUSG00000049573	10	128758625	128759649
Rpsa-ps2	ENSMUSG00000045055	10	128213798	128214307
Gm17336	ENSMUSG00000091431	10	128082940	128086867
U6	ENSMUSG00000088768	10	128381961	128382060
SNORA17	ENSMUSG00000077280	10	128739147	128739280
7SK	ENSMUSG00000084732	10	128609629	128609933
Olfr781	ENSMUSG00000059787	10	128769939	128770874
Olfr782	ENSMUSG00000057151	10	128787621	128788565
Olfr784	ENSMUSG00000062239	10	128824691	128825650
Olfr786	ENSMUSG00000064245	10	128873870	128874808
Olfr787	ENSMUSG00000057617	10	128899734	128900672
Olfr788	ENSMUSG00000049217	10	128909750	128910685
Olfr790	ENSMUSG00000044025	10	128937869	128938938
Olfr791	ENSMUSG00000047626	10	128963285	128964223
Olfr792	ENSMUSG00000057300	10	128977595	128978530
Olfr794	ENSMUSG00000044293	10	129007713	129008675
AC132266.1	ENSMUSG00000076964	10	129019842	129019951
Olfr796	ENSMUSG00000052012	10	129044603	129045535
Olfr798	ENSMUSG00000058304	10	129062180	129063115
Olfr799	ENSMUSG00000057002	10	129084186	129085121
Olfr800	ENSMUSG00000063452	10	129096860	129097799
Olfr801	ENSMUSG00000058513	10	129106617	129107573
Olfr802	ENSMUSG00000059414	10	129118855	129119793
Olfr803	ENSMUSG00000046041	10	129128169	129129095
Olfr804	ENSMUSG00000057403	10	129141936	129142880
Olfr805	ENSMUSG00000060089	10	129159639	129160598
Olfr806	ENSMUSG00000071065	10	129174817	129175971
SNORA17	ENSMUSG00000088147	10	129133034	129133157
Olfr807	ENSMUSG00000050478	10	129191545	129192541
Olfr808	ENSMUSG00000049894	10	129204554	129205492
Olfr809	ENSMUSG00000050251	10	129212883	129213982
Olfr810	ENSMUSG00000069421	10	129227665	129228670
Olfr811	ENSMUSG00000063173	10	129238620	129239579
Olfr812	ENSMUSG00000049052	10	129279076	129280118
Olfr813	ENSMUSG00000052818	10	129293576	129294508
Olfr814	ENSMUSG00000059134	10	129310879	129311811
Olfr815	ENSMUSG00000061961	10	129338832	129339782
Olfr816	ENSMUSG00000063715	10	129348394	129349332
Olfr818	ENSMUSG00000058071	10	129382160	129383116
Olfr819	ENSMUSG00000091646	10	129402792	129403754
Olfr247	ENSMUSG00000090748	10	129411661	129412623
Gm10310	ENSMUSG00000091597	10	129420536	129421498
[truncated: 1,751 more rows]

## Sheet: wk14IgG1-FHA
Gene Name	Ensembl Gene ID	Chromosome	Start	End
Txndc9	ENSMUSG00000058407	1	38040712	38054191
Eif5b	ENSMUSG00000026083	1	38054855	38112424
Rev1	ENSMUSG00000026082	1	38109632	38186507
Aff3	ENSMUSG00000037138	1	38234171	38721800
Lonrf2	ENSMUSG00000048814	1	38850514	38892935
Chst10	ENSMUSG00000026080	1	38920722	38955005
Nms	ENSMUSG00000067604	1	38995994	39007123
Pdcl3	ENSMUSG00000026078	1	39044659	39054081
Npas2	ENSMUSG00000026077	1	39250576	39420079
Rpl31	ENSMUSG00000073702	1	39424696	39428753
Tbc1d8	ENSMUSG00000003134	1	39428344	39535592
D1Bwg0212e	ENSMUSG00000003135	1	39591837	39603726
Rnf149	ENSMUSG00000048234	1	39608141	39634250
Creg2	ENSMUSG00000050967	1	39675251	39708027
Rfx8	ENSMUSG00000057173	1	39722151	39777842
Gm3646	ENSMUSG00000091937	1	39861028	39861189
Map4k4	ENSMUSG00000026074	1	39957758	40083155
Gm16150	ENSMUSG00000085391	1	38292265	38303511
Gm16151	ENSMUSG00000085280	1	38364747	38368775
Gm16152	ENSMUSG00000087131	1	38441794	38450819
Gm20428	ENSMUSG00000092553	1	39333128	39333410
Gm3617	ENSMUSG00000092563	1	39371744	39372298
Gm15832	ENSMUSG00000085894	1	39604415	39608847
D930019O06Rik	ENSMUSG00000090677	1	39707021	39714235
SNORA33	ENSMUSG00000064936	1	39630591	39630720
Snord89	ENSMUSG00000077704	1	39605590	39605699
U3	ENSMUSG00000065629	1	39576378	39576591
Tmeff2	ENSMUSG00000026109	1	50957491	51244114
Sdpr	ENSMUSG00000045954	1	51345970	51359803
Obfc2a	ENSMUSG00000026107	1	51526342	51535243
Myo1b	ENSMUSG00000018417	1	51806609	51972915
AC098743.1	ENSMUSG00000092906	1	51072157	51072257
7SK	ENSMUSG00000084531	1	50616606	50616919
Gm8420	ENSMUSG00000072324	1	51997494	51998105
Cntnap5b	ENSMUSG00000067028	1	101669342	102382519
Gm7110	ENSMUSG00000082431	1	101687006	101687602
AC111074.1	ENSMUSG00000077039	1	102758370	102758478
SNORA17	ENSMUSG00000087883	1	102149494	102149625
Rasal2	ENSMUSG00000070565	1	159065314	159342726
2810025M15Rik	ENSMUSG00000049881	1	159342483	159350366
BC026585	ENSMUSG00000033488	1	159388711	159419191
Sec16b	ENSMUSG00000026589	1	159436859	159498556
Fam5b	ENSMUSG00000004031	1	160175402	160286391
Astn1	ENSMUSG00000026587	1	160292471	160621917
Pappa2	ENSMUSG00000073530	1	160641862	160887870
1600012P17Rik	ENSMUSG00000047661	1	160888258	160910621
Gm4953	ENSMUSG00000061992	1	161098288	161098773
Gm6058	ENSMUSG00000087632	1	159314062	159314460
Gm15486	ENSMUSG00000087093	1	159428006	159441852
Mir488	ENSMUSG00000070103	1	160435756	160435864
Wdr26	ENSMUSG00000038733	1	183103359	183142109
A430110L20Rik	ENSMUSG00000054135	1	183156207	183158621
Cnih3	ENSMUSG00000026514	1	183282759	183390772
Ccdc121	ENSMUSG00000050625	1	183439764	183441582
Dnahc14	ENSMUSG00000047369	1	183669119	183699805
Lbr	ENSMUSG00000004880	1	183745447	183772532
Gm5533	ENSMUSG00000056699	1	183781739	183783320
Enah	ENSMUSG00000022995	1	183834576	183950111
Srp9	ENSMUSG00000026511	1	184054868	184062538
Vmn1r1	ENSMUSG00000091013	1	184087275	184088450
Degs1	ENSMUSG00000038633	1	184205903	184212935
Fbxo28	ENSMUSG00000047539	1	184243233	184271737
Gm10517	ENSMUSG00000073482	1	184338750	184339151
Trp53bp2	ENSMUSG00000026510	1	184339303	184392563
Capn2	ENSMUSG00000026509	1	184397391	184447655
Gm16721	ENSMUSG00000087419	1	184414398	184414958
Capn8	ENSMUSG00000038599	1	184495138	184562483
4922505E12Rik	ENSMUSG00000043429	1	184677388	184679253
Susd4	ENSMUSG00000038576	1	184693991	184826729
Tlr5	ENSMUSG00000079164	1	184884919	184906175
Rpl35a-ps2	ENSMUSG00000081214	1	183172076	183172498
Gm16547	ENSMUSG00000089888	1	183330595	183330887
Gm16539	ENSMUSG00000089927	1	183361854	183362531
U6	ENSMUSG00000064970	1	183743738	183743831
5S_rRNA	ENSMUSG00000089429	1	183770584	183770699
Tet2	ENSMUSG00000040943	3	133126643	133207354
Cxxc4	ENSMUSG00000044365	3	133899784	133925117
Tacr3	ENSMUSG00000028172	3	134491971	134597545
Cenpe	ENSMUSG00000045328	3	134875527	134936504
Bdh2	ENSMUSG00000028167	3	134944185	134967390
Nhedc2	ENSMUSG00000037994	3	134970664	135005731
Nhedc1	ENSMUSG00000050150	3	135010993	135060791
Cisd2	ENSMUSG00000028165	3	135069376	135086889
Ube2d3	ENSMUSG00000078578	3	135101261	135130142
Gm16742	ENSMUSG00000084777	3	134003249	134293729
4930539J05Rik	ENSMUSG00000090593	3	135099190	135100723
Gm2078	ENSMUSG00000091186	3	133618437	133903500
SNORA17	ENSMUSG00000077336	3	133251370	133251501
Mir1895	ENSMUSG00000084564	3	133903469	133903547
AC099576.1	ENSMUSG00000076366	3	134810372	134810477
AC164408.1	ENSMUSG00000092810	3	133902906	133902989
Manba	ENSMUSG00000028164	3	135148575	135234368
Gm16100	ENSMUSG00000083045	3	135158617	135158847
Gm9329	ENSMUSG00000083610	3	135188928	135189496
Nfkb1	ENSMUSG00000028163	3	135247619	135354511
Gm9799	ENSMUSG00000045520	3	135390302	135391702
Slc39a8	ENSMUSG00000053897	3	135488243	135551536
Bank1	ENSMUSG00000037922	3	135716327	135989030
Gm16500	ENSMUSG00000091791	3	135626423	135626782
Ppp3ca	ENSMUSG00000028161	3	136333088	136600691
Gm10955	ENSMUSG00000078574	3	136615239	136625603
U6	ENSMUSG00000065906	3	136730856	136730962
Zan	ENSMUSG00000079173	5	137819865	137918292
Epo	ENSMUSG00000029711	5	137923487	137974470
Pop7	ENSMUSG00000029715	5	137942666	137943746
Gigyf1	ENSMUSG00000029714	5	137960108	137969162
Gnb2	ENSMUSG00000029713	5	137969355	137974738
Actl6b	ENSMUSG00000029712	5	137994745	138010810
Tfr2	ENSMUSG00000029716	5	138011079	138028709
Mospd3	ENSMUSG00000037221	5	138037873	138042286
Pcolce	ENSMUSG00000029718	5	138046331	138055012
Fbxo24	ENSMUSG00000089984	5	138053731	138070230
Lrch4	ENSMUSG00000093445	5	138070349	138082327
Lrch4	ENSMUSG00000029720	5	138070403	138084127
Sap25	ENSMUSG00000079165	5	138082562	138084130
Irs3	ENSMUSG00000047182	5	138084260	138086942
Agfg2	ENSMUSG00000029722	5	138091711	138125954
6430598A04Rik	ENSMUSG00000045348	5	138172111	138182835
Tsc22d4	ENSMUSG00000029723	5	138186958	138209678
Ppp1r35	ENSMUSG00000029725	5	138220077	138221338
Mepce	ENSMUSG00000029726	5	138223134	138227943
Zcwpw1	ENSMUSG00000037108	5	138229026	138263849
Pilra	ENSMUSG00000046245	5	138263180	138277506
Pilrb1	ENSMUSG00000066684	5	138293375	138299277
Pilrb2	ENSMUSG00000066682	5	138307057	138312986
Cyp3a13	ENSMUSG00000029727	5	138334160	138362847
Gjc3	ENSMUSG00000056966	5	138395037	138404187
Azgp1	ENSMUSG00000037053	5	138422749	138431461
Gm4963	ENSMUSG00000063739	5	138434275	138434652
Smok3a	ENSMUSG00000075599	5	138462504	138475893
Smok3b	ENSMUSG00000075598	5	138478452	138491863
Zkscan1	ENSMUSG00000029729	5	138526312	138549050
Zscan21	ENSMUSG00000037017	5	138558131	138575493
Zfp113	ENSMUSG00000037007	5	138580930	138596972
Cops6	ENSMUSG00000019494	5	138602299	138605874
Mcm7	ENSMUSG00000029730	5	138605811	138613650
Ap4m1	ENSMUSG00000019518	5	138613230	138619936
Taf6	ENSMUSG00000036980	5	138619845	138628679
Cnpy4	ENSMUSG00000036968	5	138628713	138635146
Mblac1	ENSMUSG00000049285	5	138635542	138636628
Gm454	ENSMUSG00000089783	5	138644837	138648536
BC055004	ENSMUSG00000047592	5	138667126	138694591
0910001L09Rik	ENSMUSG00000050552	5	138696836	138700626
BC037034	ENSMUSG00000036948	5	138700884	138705280
BC037034	ENSMUSG00000091964	5	138700886	138705274
Gal3st4	ENSMUSG00000075593	5	138706149	138714068
Gpc2	ENSMUSG00000029510	5	138706180	138721233
Stag3	ENSMUSG00000036928	5	138721468	138753621
Gm10874	ENSMUSG00000075591	5	138804947	138829515
Zfp157	ENSMUSG00000036898	5	138882696	138901922
1700123K08Rik	ENSMUSG00000029526	5	139003068	139005922
Zfp68	ENSMUSG00000058291	5	139045844	139060989
A430033K04Rik	ENSMUSG00000056014	5	139064087	139090052
Fam20c	ENSMUSG00000025854	5	139230468	139286031
Pdgfa	ENSMUSG00000025856	5	139451968	139473324
Gm17247	ENSMUSG00000090903	5	139461462	139461950
6330403L08Rik	ENSMUSG00000075585	5	139471010	139476530
Prkar1b	ENSMUSG00000025855	5	139493260	139625955
Heatr2	ENSMUSG00000025857	5	139626177	139662464
Sun1	ENSMUSG00000036817	5	139676591	139725794
Get4	ENSMUSG00000025858	5	139728278	139746005
Adap1	ENSMUSG00000056413	5	139747830	139801576
Cox19	ENSMUSG00000045438	5	139812143	139821187
Cyp2w1	ENSMUSG00000029541	5	139828571	139832987
3110082I17Rik	ENSMUSG00000053553	5	139835693	139936456
Gpr146	ENSMUSG00000044197	5	139853696	139872369
D830046C22Rik	ENSMUSG00000021206	5	139854174	139855213
C130050O18Rik	ENSMUSG00000044092	5	139881234	139891577
Gm17112	ENSMUSG00000090873	5	137973651	137981946
Gm16089	ENSMUSG00000081228	5	138056855	138057190
Gm15498	ENSMUSG00000079163	5	138126382	138131979
Gm15753	ENSMUSG00000082088	5	138161582	138162968
Gm15502	ENSMUSG00000083813	5	138337980	138338187
Smok3c	ENSMUSG00000079156	5	138494423	138507767
6330418K02Rik	ENSMUSG00000085227	5	138705271	138707889
Got2-ps1	ENSMUSG00000080935	5	138805488	138806780
Gm5564	ENSMUSG00000046440	5	138946066	138947174
Gm15497	ENSMUSG00000081142	5	139051967	139052517
Gm15672	ENSMUSG00000086873	5	139623530	139626647
Mir93	ENSMUSG00000065527	5	138606751	138606838
Mir339	ENSMUSG00000065593	5	139845604	139845699
U6	ENSMUSG00000064892	5	138819819	138819925
AC125115.1	ENSMUSG00000092916	5	139047927	139048009
Mir106b	ENSMUSG00000065514	5	138606965	138607046
Mir25	ENSMUSG00000065394	5	138606549	138606632
U4	ENSMUSG00000084469	5	138660965	138661044
Gpr30	ENSMUSG00000053647	5	139899105	139903754
Zfand2a	ENSMUSG00000053581	5	139947165	139960503
Uncx	ENSMUSG00000029546	5	140019448	140079180
Micall2	ENSMUSG00000036718	5	140182647	140212290
Ints1	ENSMUSG00000029547	5	140227236	140251632
Mafk	ENSMUSG00000018143	5	140267467	140278607
Tmem184a	ENSMUSG00000036687	5	140278439	140295871
Psmg3	ENSMUSG00000029551	5	140299548	140302797
Elfn1	ENSMUSG00000048988	5	140383897	140450665
Mad1l1	ENSMUSG00000029554	5	140484643	140797506
Gm16122	ENSMUSG00000085673	5	140550059	140561466
Gm16121	ENSMUSG00000087606	5	140577153	140583545
Gm16120	ENSMUSG00000087248	5	140683339	140686705
U6	ENSMUSG00000065300	5	139919553	139919659
7SK	ENSMUSG00000064694	5	140320884	140321204
Cyp3a41b	ENSMUSG00000075552	5	146319544	146345599
Cyp3a41a	ENSMUSG00000075551	5	146505635	146531712
Cyp3a44	ENSMUSG00000054417	5	146585559	146617450
Cyp3a11	ENSMUSG00000056035	5	146666002	146691540
Cyp3a25	ENSMUSG00000029630	5	146788770	146821194
Cyp3a59	ENSMUSG00000061292	5	146890834	146924861
Gm6309	ENSMUSG00000079096	5	146979552	146996880
Rnf6	ENSMUSG00000029634	5	147020768	147033131
Cdk8	ENSMUSG00000029635	5	147042806	147114450
Gsx1	ENSMUSG00000053129	5	148000272	148002523
Gm17398	ENSMUSG00000091377	5	148211130	148213493
Pdx1	ENSMUSG00000029644	5	148081535	148089584
Cdx2	ENSMUSG00000029646	5	148112381	148118846
Prhoxnb	ENSMUSG00000075543	5	148126562	148134016
Flt3	ENSMUSG00000042817	5	148142317	148212065
Pan3	ENSMUSG00000029647	5	148241737	148360078
Mtif3	ENSMUSG00000016510	5	147763149	147775376
Lnx2	ENSMUSG00000016520	5	147828231	147888162
Polr1d	ENSMUSG00000029642	5	147888626	147922937
Gm15739	ENSMUSG00000080957	5	147060127	147060998
Gm15633	ENSMUSG00000083988	5	147912138	147912629
2210019I11Rik	ENSMUSG00000092570	5	148040172	148083097
Gm6054	ENSMUSG00000057157	5	148220558	148220935
Wasf3	ENSMUSG00000029636	5	147196561	147283987
Gm6370	ENSMUSG00000079094	5	147302938	147305530
4930449I24Rik	ENSMUSG00000079093	5	147314004	147316759
Gm3402	ENSMUSG00000041505	5	147325701	147328300
Gm3404	ENSMUSG00000079091	5	147337377	147340129
Gm3409	ENSMUSG00000079090	5	147349252	147351825
Gm3415	ENSMUSG00000079089	5	147367740	147370313
Gpr12	ENSMUSG00000041468	5	147393727	147396815
Usp12	ENSMUSG00000029640	5	147546385	147606582
Rpl21	ENSMUSG00000041453	5	147644466	147648608
Rasl11a	ENSMUSG00000029641	5	147656647	147659302
Gm10858	ENSMUSG00000075546	5	147705790	147708726
Gtf3a	ENSMUSG00000016503	5	147760233	147767190
Mir5105	ENSMUSG00000093077	5	147072579	147072660
SNORA17	ENSMUSG00000077735	5	148011700	148011829
SNORD102	ENSMUSG00000077185	5	147646410	147646480
SNORA27	ENSMUSG00000077564	5	147646720	147646848
Flt1	ENSMUSG00000029648	5	148373180	148537587
Pomp	ENSMUSG00000029649	5	148672204	148687354
Cav2	ENSMUSG00000000058	6	17231185	17239115
Cav1	ENSMUSG00000007655	6	17256335	17291452
Met	ENSMUSG00000009376	6	17413800	17523980
Capza2	ENSMUSG00000015733	6	17586234	17616972
St7	ENSMUSG00000029534	6	17642933	17893025
Wnt2	ENSMUSG00000010797	6	17938940	17980585
Asz1	ENSMUSG00000010796	6	18000964	18059061
Cftr	ENSMUSG00000041301	6	18120687	18272768
Cttnbp2	ENSMUSG00000000416	6	18316478	18465338
Naa38	ENSMUSG00000044155	6	18798579	18805751
Ankrd7	ENSMUSG00000029517	6	18816318	18829586
Gm15581	ENSMUSG00000085264	6	17156823	17335604
Gm13898	ENSMUSG00000086409	6	17660598	17661225
Gm13899	ENSMUSG00000081077	6	17661687	17662941
Gm15593	ENSMUSG00000084203	6	18094734	18095741
Gm15596	ENSMUSG00000082289	6	18106337	18107120
Gm15592	ENSMUSG00000087389	6	18220136	18239048
Gm15595	ENSMUSG00000080767	6	18244271	18245231
Gm15594	ENSMUSG00000084947	6	18374684	18377885
Gm5874	ENSMUSG00000071568	6	18774552	18775058
Gm16854	ENSMUSG00000085607	6	18794220	18797360
U6	ENSMUSG00000064965	6	17386306	17386412
AC027654.1	ENSMUSG00000093271	6	18399271	18399340
U6	ENSMUSG00000065051	6	18677292	18677398
7SK	ENSMUSG00000084650	6	18996837	18997151
Gm17725	ENSMUSG00000091555	6	51329709	51342776
Gm15055	ENSMUSG00000085412	6	52052948	52062531
Gm8078	ENSMUSG00000081979	6	52068241	52068890
Gm15052	ENSMUSG00000082781	6	52081777	52082045
Gm15051	ENSMUSG00000087658	6	52106901	52112118
5730446D14Rik	ENSMUSG00000056445	6	52115673	52119563
Gm15050	ENSMUSG00000087626	6	52122880	52124058
2700086A05Rik	ENSMUSG00000085696	6	52125216	52165075
9930038K12Rik	ENSMUSG00000092475	6	52178246	52180531
9930038K12Rik	ENSMUSG00000056583	6	52180079	52180529
Hoxa11as	ENSMUSG00000086427	6	52194392	52199798
Gm15053	ENSMUSG00000055408	6	52212769	52217597
5730457N03Rik	ENSMUSG00000086126	6	52258383	52264826
Gm8129	ENSMUSG00000059159	6	52296724	52296939
Gm15054	ENSMUSG00000084282	6	52307538	52307818
Hnrnpa2b1	ENSMUSG00000004980	6	51410433	51419893
Cbx3	ENSMUSG00000029836	6	51420359	51433703
Snx10	ENSMUSG00000038301	6	51473900	51540678
Skap2	ENSMUSG00000059182	6	51809165	51962548
Hoxa1	ENSMUSG00000029844	6	52105366	52108316
Hoxa2	ENSMUSG00000014704	6	52112350	52115412
RP23-103L13.8	ENSMUSG00000093412	6	52113358	52163338
Hoxa3	ENSMUSG00000079560	6	52118509	52163335
5730596B20Rik	ENSMUSG00000056468	6	52127497	52130850
Hoxa4	ENSMUSG00000000942	6	52139670	52141752
Hoxa3	ENSMUSG00000059723	6	52149150	52163335
Hoxa5	ENSMUSG00000038253	6	52151753	52154586
Hoxa6	ENSMUSG00000043219	6	52155430	52161355
Hoxa7	ENSMUSG00000038236	6	52164490	52171853
Hoxa9	ENSMUSG00000038227	6	52173099	52181088
Hoxa10	ENSMUSG00000000938	6	52181196	52190853
Hoxa11	ENSMUSG00000038210	6	52192107	52196213
Hoxa13	ENSMUSG00000038203	6	52207693	52210874
Evx1	ENSMUSG00000005503	6	52263492	52268372
Hibadh	ENSMUSG00000029776	6	52496222	52590383
Nfe2l3	ENSMUSG00000029832	6	51382669	51408767
G930045G22Rik	ENSMUSG00000073072	6	50796523	50828078
Mir148a	ENSMUSG00000065505	6	51219811	51219909
SNORA32	ENSMUSG00000064792	6	52589228	52589349
AC153877.1	ENSMUSG00000092936	6	51571631	51571707
Mir196b	ENSMUSG00000065443	6	52180080	52180164
Tax1bp1	ENSMUSG00000004535	6	52663723	52716774
Jazf1	ENSMUSG00000063568	6	52718791	53018625
Rgs9bp	ENSMUSG00000056043	7	36364017	36370601
Gm17327	ENSMUSG00000090311	7	35009774	35015255
Pdcd2l	ENSMUSG00000002635	7	34969518	34981680
Gpi1	ENSMUSG00000036427	7	34987141	35015308
4931406P16Rik	ENSMUSG00000066571	7	35021726	35098570
Gm6096	ENSMUSG00000078380	7	35036057	35036512
Lsm14a	ENSMUSG00000066568	7	35129665	35174559
Kctd15	ENSMUSG00000030499	7	35424033	35440528
Chst8	ENSMUSG00000060402	7	35459487	35597730
Pepd	ENSMUSG00000063931	7	35697398	35829729
Cebpg	ENSMUSG00000056216	7	35831441	35841522
Cebpa	ENSMUSG00000034957	7	35904312	35906945
Slc7a10	ENSMUSG00000030495	7	35971404	35989917
Lrp3	ENSMUSG00000001802	7	35984852	36000389
Gpatch1	ENSMUSG00000063808	7	36061555	36103459
Rhpn2	ENSMUSG00000030494	7	36119194	36177304
C230052I12Rik	ENSMUSG00000030493	7	36177294	36181836
Gm12782	ENSMUSG00000081714	7	34565836	34566562
Gm12768	ENSMUSG00000081510	7	34629955	34630713
Gm12777	ENSMUSG00000084296	7	34638075	34639837
Gm12757	ENSMUSG00000081317	7	34664314	34665113
Gm12765	ENSMUSG00000083085	7	34722280	34723256
Gm12759	ENSMUSG00000083942	7	34743824	34745005
Gm12773	ENSMUSG00000081962	7	34782018	34782604
Gm12755	ENSMUSG00000081768	7	34783031	34791480
Gm12760	ENSMUSG00000083434	7	34821466	34822451
Gm12779	ENSMUSG00000080947	7	34853574	34853765
Gm12778	ENSMUSG00000081491	7	34960731	34961063
Gm12783	ENSMUSG00000081161	7	34961777	34965023
Gm12762	ENSMUSG00000086526	7	35015439	35019094
Gm12758	ENSMUSG00000085105	7	35019396	35025226
Gm12774	ENSMUSG00000082684	7	35168678	35169093
Gm12764	ENSMUSG00000086184	7	35173684	35179798
Gm12766	ENSMUSG00000085124	7	35223156	35305904
Gm12780	ENSMUSG00000081863	7	35280440	35281084
Gm12784	ENSMUSG00000086631	7	35332225	35341223
Gm12781	ENSMUSG00000085923	7	35438203	35445435
Gm12756	ENSMUSG00000087127	7	35450432	35459018
Ccdc123	ENSMUSG00000023072	7	36182054	36223708
Abpz	ENSMUSG00000046438	7	34522209	34524331
Gm12769	ENSMUSG00000078753	7	34528811	34530122
Abpg	ENSMUSG00000066586	7	34728021	34730059
Abpb	ENSMUSG00000066584	7	34796951	34798961
Abpa	ENSMUSG00000066583	7	34806502	34807900
Gm12776	ENSMUSG00000078752	7	34880450	34885856
Wtip	ENSMUSG00000036459	7	34894562	34918287
Uba2	ENSMUSG00000052997	7	34925708	34954618
Pdcd5	ENSMUSG00000030417	7	36427001	36432540
Dpy19l3	ENSMUSG00000043671	7	36470184	36539473
Ankrd27	ENSMUSG00000034867	7	36371266	36424256
Slc7a9	ENSMUSG00000030492	7	36234056	36251055
Tdrd12	ENSMUSG00000030491	7	36254117	36322764
Nudt19	ENSMUSG00000034875	7	36332204	36341323
SNORA17	ENSMUSG00000077469	7	35728875	35729004
5S_rRNA	ENSMUSG00000088799	7	35886841	35886959
U7	ENSMUSG00000089086	7	34562609	34562673
BX537299.1	ENSMUSG00000077044	7	34593136	34593245
AC150683.1	ENSMUSG00000093715	7	36019779	36019847
AC149058.1	ENSMUSG00000093153	7	35866929	35866998
SNORA17	ENSMUSG00000088307	7	36002254	36002379
Gm16759	ENSMUSG00000086539	9	63247188	63416498
Gm6257	ENSMUSG00000091866	9	63290973	63291882
1700055C04Rik	ENSMUSG00000093616	9	63886272	63889272
2600006L11Rik	ENSMUSG00000093759	9	63928568	63934768
Pias1	ENSMUSG00000032405	9	62727884	62828690
Skor1	ENSMUSG00000022245	9	62985977	62996768
Map2k5	ENSMUSG00000058444	9	63011576	63225659
2300009A05Rik	ENSMUSG00000032403	9	63242254	63247051
Iqch	ENSMUSG00000037801	9	63269262	63450300
Aagab	ENSMUSG00000037257	9	63450462	63489696
Smad3	ENSMUSG00000032402	9	63494574	63605801
Smad6	ENSMUSG00000036867	9	63800883	63869866
Lctl	ENSMUSG00000032401	9	63964954	63985925
Zwilch	ENSMUSG00000032400	9	63984951	64020911
Rpl4	ENSMUSG00000032399	9	64021194	64026369
Snapc5	ENSMUSG00000032398	9	64027104	64030491
Map2k1	ENSMUSG00000004936	9	64033577	64101438
1110036E04Rik	ENSMUSG00000086106	9	63897636	63901907
Rab11a	ENSMUSG00000004771	9	64563106	64585565
Dennd4a	ENSMUSG00000053641	9	64659147	64767474
Uchl4	ENSMUSG00000035337	9	64083008	64084169
Tipin	ENSMUSG00000032397	9	64129414	64152599
Dis3l	ENSMUSG00000032396	9	64154564	64189095
Megf11	ENSMUSG00000036466	9	64233433	64557012
SCARNA14	ENSMUSG00000088254	9	64143738	64143872
U6	ENSMUSG00000064559	9	62981090	62981196
AC122057.1	ENSMUSG00000093137	9	63290126	63290267
SNORD16	ENSMUSG00000065359	9	64024468	64024566
SNORD18	ENSMUSG00000064514	9	64024930	64025000
AC160118.1	ENSMUSG00000093239	9	64073330	64073456
Snord16a	ENSMUSG00000065829	9	64023230	64023328
U1	ENSMUSG00000064855	9	62875367	62875524
SNORD18	ENSMUSG00000065752	9	64022855	64022922
5S_rRNA	ENSMUSG00000088988	9	63896303	63896397
SNORD18	ENSMUSG00000064918	9	64023678	64023748
SNORA17	ENSMUSG00000089336	9	64729591	64729732
Gm15896	ENSMUSG00000081273	9	82096255	82097005
Mei4	ENSMUSG00000043289	9	81757277	82099614
Irak1bp1	ENSMUSG00000032251	9	82723413	82741295
Phip	ENSMUSG00000032253	9	82759766	82869096
Hmgn3	ENSMUSG00000066456	9	83003555	83040292
Lca5	ENSMUSG00000032258	9	83283900	83334734
Lca5	ENSMUSG00000090403	9	83284216	83286185
Gm17498	ENSMUSG00000092026	9	83303183	83303530
Rps27a-ps2	ENSMUSG00000058838	9	83303245	83303770
Sh3bgrl2	ENSMUSG00000032261	9	83441934	83532408
Elovl4	ENSMUSG00000032262	9	83672300	83699912
Ttk	ENSMUSG00000038379	9	83728296	83765997
Gm5919	ENSMUSG00000090522	9	83775821	83779657
Bckdhb	ENSMUSG00000032263	9	83818757	84017846
U6	ENSMUSG00000088760	9	82356963	82357059
U6	ENSMUSG00000064469	9	83831976	83832082
SNORA17	ENSMUSG00000077415	9	82141455	82141585
U7	ENSMUSG00000089066	9	82333021	82333081
U1	ENSMUSG00000077666	9	84081962	84082146
Gm16202	ENSMUSG00000083731	9	86209748	86210291
Ube2cbp	ENSMUSG00000032415	9	86200841	86358557
Dopey1	ENSMUSG00000034973	9	86360761	86449413
Gm17530	ENSMUSG00000092099	9	86440289	86440402
Pgm3	ENSMUSG00000056131	9	86446083	86465449
Rwdd2a	ENSMUSG00000032417	9	86465660	86468503
Me1	ENSMUSG00000032418	9	86474970	86589947
A330041J22Rik	ENSMUSG00000087466	9	86589575	86593867
Prss35	ENSMUSG00000033491	9	86636434	86650680
Snap91	ENSMUSG00000033419	9	86659981	86775489
Ripply2	ENSMUSG00000047897	9	86910372	86914751
Cyb5r4	ENSMUSG00000032872	9	86916849	86972609
Mrap2	ENSMUSG00000042761	9	87039140	87078880
4922501C03Rik	ENSMUSG00000056919	9	87084408	87150371
Tbx18	ENSMUSG00000032419	9	87597635	87626095
SNORA17	ENSMUSG00000077712	9	87783298	87783429
5S_rRNA	ENSMUSG00000087731	9	87094944	87095077
SNORA17	ENSMUSG00000089373	9	86597857	86597984
SNORA17	ENSMUSG00000077553	9	87916258	87916387
CAAA01037531.1.36077.1	ENSMUSG00000093074	9	86593076	86593189
Gm9888	ENSMUSG00000052724	9	114689218	114691375
Gm16142	ENSMUSG00000087469	9	115900074	115910906
Gm9385	ENSMUSG00000080848	9	115949711	115950182
Glb1	ENSMUSG00000045594	9	114310194	114383495
Ccr4	ENSMUSG00000047898	9	114399434	114405662
Trim71	ENSMUSG00000079259	9	114420393	114473487
Cnot10	ENSMUSG00000056167	9	114494996	114549192
Dync1li1	ENSMUSG00000032435	9	114597908	114633420
Cmtm6	ENSMUSG00000032434	9	114640321	114658461
Cmtm7	ENSMUSG00000032436	9	114665955	114690963
Cmtm8	ENSMUSG00000041012	9	114698463	114753270
Gpd1l	ENSMUSG00000050627	9	114808459	114843105
Gm9846	ENSMUSG00000050621	9	114891515	114891858
Osbpl10	ENSMUSG00000040875	9	114976397	115141341
Stt3b	ENSMUSG00000032437	9	115151725	115219539
Gm5921	ENSMUSG00000074034	9	115346818	115347699
Gadl1	ENSMUSG00000056880	9	115817682	115985294
Tgfbr2	ENSMUSG00000032440	9	115993415	116084383
n-R5s92	ENSMUSG00000065149	9	115535718	115535836
U6	ENSMUSG00000087925	9	114511206	114511310
AC161265.2	ENSMUSG00000080636	9	115291217	115291339
AC161265.1	ENSMUSG00000080495	9	115291078	115291196
Mir467h	ENSMUSG00000080409	9	115290937	115291057
U6	ENSMUSG00000084638	9	114747291	114747394
Utrn	ENSMUSG00000019820	10	12101986	12589163
Stx11	ENSMUSG00000039232	10	12659787	12684065
Sf3b5	ENSMUSG00000078348	10	12728256	12728988
Plagl1	ENSMUSG00000019817	10	12810497	12851500
Fam164b	ENSMUSG00000019815	10	12869346	12897829
Ltv1	ENSMUSG00000019814	10	12898446	12912943
Phactr2	ENSMUSG00000062866	10	12933201	13194202
Fuca2	ENSMUSG00000019810	10	13219346	13238841
Pex3	ENSMUSG00000019809	10	13243648	13272948
Adat2	ENSMUSG00000019808	10	13272700	13283182
Aig1	ENSMUSG00000019806	10	13366860	13588786
Hivep2	ENSMUSG00000015501	10	13686185	13871182
Gm8330	ENSMUSG00000091527	10	13686830	13727211
B230208H11Rik	ENSMUSG00000085233	10	12636446	12642898
U6	ENSMUSG00000064531	10	13608343	13608449
U1	ENSMUSG00000065096	10	12083208	12083371
U6	ENSMUSG00000088516	10	12513673	12513772
SNORA73	ENSMUSG00000065181	10	12088421	12088630
Gm16234	ENSMUSG00000085572	10	14384026	14388124
Gm8355	ENSMUSG00000059814	10	14465084	14467190
Gpr126	ENSMUSG00000039116	10	14122391	14264842
Gm10335	ENSMUSG00000071532	10	14242884	14243354
Vta1	ENSMUSG00000019868	10	14374561	14425366
Gje1	ENSMUSG00000019867	10	14435429	14438020
Nmbr	ENSMUSG00000019865	10	14480027	14490389
B230364G03Rik	ENSMUSG00000090645	10	14478441	14480526
SNORA17	ENSMUSG00000088730	10	14704476	14704605
SNORA17	ENSMUSG00000089333	10	13953319	13953429
Gm15691	ENSMUSG00000085472	12	30744522	30746978
Dcdc2c	ENSMUSG00000020633	12	29122660	29232182
Allc	ENSMUSG00000020636	12	29238620	29267388
Colec11	ENSMUSG00000036655	12	29279038	29308155
Rps7	ENSMUSG00000061477	12	29315712	29320818
Rnaseh1	ENSMUSG00000020630	12	29334467	29344456
Adi1	ENSMUSG00000020629	12	29360096	29367040
Ttc15	ENSMUSG00000020628	12	29375494	29435331
Tssc1	ENSMUSG00000036613	12	29436693	29552356
Myt1l	ENSMUSG00000061911	12	30213249	30608074
Pxdn	ENSMUSG00000020674	12	30622901	30702523
Tpo	ENSMUSG00000020673	12	30739524	30817489
SNORA17	ENSMUSG00000077792	12	29035128	29035259
5S_rRNA	ENSMUSG00000089583	12	29720045	29720159
Sntg2	ENSMUSG00000020672	12	30859347	31058240
Tmem18	ENSMUSG00000043061	12	31269308	31276078
AC159204.1	ENSMUSG00000092653	12	31242779	31242999
AC154485.1	ENSMUSG00000088872	12	31142833	31142936
AC160932.1	ENSMUSG00000093150	12	31519797	31519867
Fam150b	ENSMUSG00000054204	12	31569187	31578719
Acp1	ENSMUSG00000044573	12	31578191	31596477
Sh3yl1	ENSMUSG00000020669	12	31596533	31645027
2610021K21Rik	ENSMUSG00000021176	12	100955741	101121652
Tdp1	ENSMUSG00000021177	12	101122727	101193429
Kcnk13	ENSMUSG00000045404	12	101202709	101300892
Psmc1	ENSMUSG00000021178	12	101348396	101361574
BC002230	ENSMUSG00000021179	12	101363662	101397863
Calm1	ENSMUSG00000001175	12	101437645	101448016
Ttc7b	ENSMUSG00000033530	12	101538981	101759032
Rps6ka5	ENSMUSG00000021180	12	101787988	101963238
9030617O03Rik	ENSMUSG00000021185	12	102017267	102135191
Gpr68	ENSMUSG00000047415	12	102114892	102146408
Gm10431	ENSMUSG00000072880	12	102137225	102137614
Ccdc88c	ENSMUSG00000021182	12	102149734	102267269
Smek1	ENSMUSG00000041846	12	102277619	102321912
Kif4-ps	ENSMUSG00000092054	12	102383824	102387492
Catsperb	ENSMUSG00000047014	12	102642883	102864219
Gm10433	ENSMUSG00000072884	12	101426178	101431750
Gm8482	ENSMUSG00000082604	12	102102179	102102649
Gm16956	ENSMUSG00000085349	12	100802051	100858248
Gm17302	ENSMUSG00000091093	12	101447198	101448024
A630072L19Rik	ENSMUSG00000086626	12	102179952	102188085
D130020L05Rik	ENSMUSG00000042922	12	102320691	102327137
AC123824.1	ENSMUSG00000077058	12	102792289	102792398
Mir1190	ENSMUSG00000080575	12	102259883	102260003
AC159243.1	ENSMUSG00000093352	12	101220985	101221062
U6	ENSMUSG00000064572	12	102007233	102007338
U6	ENSMUSG00000064424	12	102461802	102461908
Tc2n	ENSMUSG00000021187	12	102883653	102956733
Gm16285	ENSMUSG00000090152	12	102884396	102884742
Fbln5	ENSMUSG00000021186	12	102984775	103057265
Trip11	ENSMUSG00000021188	12	103072253	103151477
Atxn3	ENSMUSG00000021189	12	103157111	103196456
Atxn3	ENSMUSG00000093596	12	103157111	103196392
RP24-262G23.4	ENSMUSG00000093758	12	103105159	103105505
RP24-262G23.3	ENSMUSG00000093437	12	103144290	103144749
Gm20036	ENSMUSG00000093579	12	103151450	103153545
Cpsf2	ENSMUSG00000041781	12	103214184	103244203
Slc24a4	ENSMUSG00000041771	12	103366943	103505301
Rin3	ENSMUSG00000044456	12	103521258	103629065
Lgmn	ENSMUSG00000021190	12	103632294	103678023
Golga5	ENSMUSG00000021192	12	103708120	103736112
Chga	ENSMUSG00000021194	12	103793179	103803237
Itpk1	ENSMUSG00000057963	12	103806793	103943079
Gm16339	ENSMUSG00000090050	12	103366016	103368116
U3	ENSMUSG00000064776	12	103491684	103491897
Moap1	ENSMUSG00000091931	12	103978040	103996882
AK010878	ENSMUSG00000041716	12	103978040	103996882
D230037D09Rik	ENSMUSG00000046675	12	103981970	103985771
Ubr7	ENSMUSG00000041712	12	103996177	104015911
Btbd7	ENSMUSG00000041702	12	104022866	104116616
Cox8c	ENSMUSG00000043319	12	104137516	104138744
Mir1936	ENSMUSG00000089324	12	103923138	103923230
Unc79	ENSMUSG00000021198	12	104187069	104422208
Prima1	ENSMUSG00000041669	12	104435118	104480360
A730018C14Rik	ENSMUSG00000047828	12	113652126	113661423
A530016L24Rik	ENSMUSG00000043122	12	113727659	113738138
Tmem179	ENSMUSG00000054013	12	113738395	113749371
Inf2	ENSMUSG00000037679	12	113826995	113853767
Adssl1	ENSMUSG00000011148	12	113858258	113879565
Siva1	ENSMUSG00000064326	12	113883039	113887363
Akt1	ENSMUSG00000001729	12	113892032	113913095
Zbtb42	ENSMUSG00000037638	12	113917039	113920958
AW555464	ENSMUSG00000072825	12	113960385	113984802
Pld4	ENSMUSG00000052160	12	113998866	114007197
Ahnak2	ENSMUSG00000072812	12	114010405	114040868
BC022687	ENSMUSG00000037594	12	114047186	114054456
Cdca4	ENSMUSG00000047832	12	114058448	114067600
Gpr132	ENSMUSG00000021298	12	114089087	114099127
Gm17723	ENSMUSG00000091222	12	114131774	114133577
Jag2	ENSMUSG00000002799	12	114146801	114167706
Nudt14	ENSMUSG00000002804	12	114172944	114180329
Brf1	ENSMUSG00000011158	12	114198073	114238832
Btbd6	ENSMUSG00000002803	12	114214693	114217141
Pacs2	ENSMUSG00000021143	12	114252719	114312612
Tex22	ENSMUSG00000012211	12	114312713	114327128
Mta1	ENSMUSG00000021144	12	114336489	114375417
Crip2	ENSMUSG00000006356	12	114378447	114383715
Crip1	ENSMUSG00000006360	12	114390223	114392088
4930427A07Rik	ENSMUSG00000037466	12	114394632	114413736
Tmem121	ENSMUSG00000049036	12	114424114	114427731
Ighe	ENSMUSG00000087642	12	114509391	114511457
Ighg2c	ENSMUSG00000076612	12	114523536	114527141
Gm17421	ENSMUSG00000090726	12	114606713	114607927
Gm11029	ENSMUSG00000078993	12	114655095	114657149
Adam6b	ENSMUSG00000051804	12	114727756	114730229
Adam6a	ENSMUSG00000043945	12	114782119	114784625
Gm17274	ENSMUSG00000090980	12	114184574	114188723
Ighe	ENSMUSG00000076611	12	114509484	114511358
Ighg2b	ENSMUSG00000076613	12	114544600	114546144
Ighg1	ENSMUSG00000076614	12	114567187	114568734
Ighg3	ENSMUSG00000076615	12	114597876	114599443
Ighm	ENSMUSG00000076617	12	114659078	114660941
Ighj4	ENSMUSG00000076618	12	114666725	114666778
Ighj3	ENSMUSG00000076619	12	114667296	114667343
Ighj2	ENSMUSG00000076620	12	114667725	114667778
Ighj1	ENSMUSG00000076621	12	114667992	114668044
Ighd4-1	ENSMUSG00000076622	12	114668739	114668749
Ighd3-2	ENSMUSG00000076623	12	114686425	114686440
Ighd5-6	ENSMUSG00000091062	12	114687799	114687810
Ighd2-8	ENSMUSG00000076624	12	114689062	114689078
Ighd5-5	ENSMUSG00000091857	12	114693153	114693162
Ighd2-7	ENSMUSG00000076625	12	114694931	114694947
Ighd5-8	ENSMUSG00000091051	12	114698075	114698103
Ighd5-4	ENSMUSG00000091630	12	114698312	114698321
Ighd2-6	ENSMUSG00000076626	12	114699580	114699596
Ighd5-7	ENSMUSG00000092160	12	114702735	114702763
Ighd5-3	ENSMUSG00000091334	12	114702972	114702981
Ighd2-5	ENSMUSG00000076627	12	114704238	114704254
Ighd5-2	ENSMUSG00000091394	12	114707637	114707646
Ighd2-4	ENSMUSG00000076628	12	114708905	114708921
Ighd6-2	ENSMUSG00000091704	12	114713086	114713114
Ighd2-3	ENSMUSG00000076629	12	114713611	114713627
Ighd6-1	ENSMUSG00000090563	12	114718354	114718382
Ighd1-1	ENSMUSG00000076630	12	114720381	114720403
Ighd3-1	ENSMUSG00000076631	12	114763524	114763540
Ighd5-1	ENSMUSG00000091517	12	114765011	114765020
Gm16968	ENSMUSG00000076632	12	114766243	114766265
Ighv2-1	ENSMUSG00000091606	12	114812453	114812892
Ighv5-2	ENSMUSG00000076633	12	114816715	114817201
Ighv2-2	ENSMUSG00000076634	12	114826478	114826911
Ighv5-4	ENSMUSG00000076635	12	114835657	114836116
Ighv2-3	ENSMUSG00000076636	12	114849395	114849828
Ighv5-6	ENSMUSG00000076637	12	114863717	114864167
Ighv2-4	ENSMUSG00000076638	12	114891502	114891935
Gm17309	ENSMUSG00000090395	12	114893178	114893455
Ighv5-9	ENSMUSG00000076639	12	114899980	114900439
Ighv2-5	ENSMUSG00000076640	12	114923693	114924126
Ighv5-12	ENSMUSG00000076641	12	114940335	114940789
Ighv2-6	ENSMUSG00000076642	12	114954886	114955314
Ighv5-9-1	ENSMUSG00000076643	12	114974322	114974781
Ighv2-9-1	ENSMUSG00000076645	12	115008061	115008494
Ighv2-6-8	ENSMUSG00000076646	12	115034354	115034778
Ighv2-7	ENSMUSG00000076647	12	115045525	115045958
Ighv5-15	ENSMUSG00000076648	12	115064857	115065332
Ighv5-16	ENSMUSG00000076649	12	115076737	115077194
Ighv5-17	ENSMUSG00000076650	12	115097360	115097827
Ighv2-9	ENSMUSG00000076651	12	115117307	115117740
Ighv7-1	ENSMUSG00000076652	12	115134625	115135157
Ighv7-2	ENSMUSG00000076653	12	115150236	115150694
Ighv14-1	ENSMUSG00000076654	12	115170164	115170593
Ighv4-1	ENSMUSG00000076655	12	115186493	115186943
Ighv3-1	ENSMUSG00000076669	12	115202599	115202894
Ighv11-1	ENSMUSG00000076657	12	115220090	115220552
Ighv14-2	ENSMUSG00000076658	12	115232680	115233109
Ighv3-2	ENSMUSG00000078992	12	115272144	115272302
Ighv11-2	ENSMUSG00000076659	12	115286452	115286915
Ighv14-3	ENSMUSG00000076660	12	115298056	115298484
Ighv16-1	ENSMUSG00000076661	12	115307039	115307337
Ighv9-1	ENSMUSG00000076662	12	115332139	115332432
Ighv9-2	ENSMUSG00000076663	12	115347212	115347641
Ighv9-3	ENSMUSG00000076664	12	115378903	115379333
Ighv7-3	ENSMUSG00000076665	12	115391395	115391855
Ighv14-4	ENSMUSG00000076666	12	115414655	115415073
Ighv3-3	ENSMUSG00000076667	12	115434650	115434945
AC073553.3	ENSMUSG00000092748	12	114663361	114663438
AC073553.2	ENSMUSG00000092737	12	114662960	114663029
U6	ENSMUSG00000087842	12	114452360	114452463
AC073553.1	ENSMUSG00000092683	12	114662856	114662933
Ighv7-4	ENSMUSG00000076668	12	115460999	115461465
Ighv3-5	ENSMUSG00000076670	12	115500483	115501161
Ighv13-1	ENSMUSG00000076671	12	115505818	115506117
Ighv3-6	ENSMUSG00000076672	12	115526363	115526793
Ighv9-4	ENSMUSG00000076673	12	115538172	115538465
Ighv3-8	ENSMUSG00000076674	12	115560585	115561012
Ighv13-2	ENSMUSG00000087582	12	115595972	115596429
Ighv12-3	ENSMUSG00000076676	12	115604737	115605165
Ighv6-3	ENSMUSG00000076677	12	115629923	115630380
Ighv6-6	ENSMUSG00000076680	12	115672999	115673455
Ighv1-2	ENSMUSG00000078991	12	115707316	115707438
Ighv10-1	ENSMUSG00000076683	12	115717216	115717662
Ighv1-4	ENSMUSG00000076684	12	115725347	115725780
Ighv1-5	ENSMUSG00000076685	12	115751541	115751834
Ighv10-3	ENSMUSG00000076686	12	115761652	115762098
Ighv1-7	ENSMUSG00000076687	12	115776706	115776999
Ighv15-2	ENSMUSG00000076688	12	115802789	115803223
Ighv1-9	ENSMUSG00000076689	12	115821780	115822213
Ighv1-12	ENSMUSG00000076691	12	115854061	115854354
Gm17686	ENSMUSG00000090765	12	115868891	115869184
Ighv1-14	ENSMUSG00000076692	12	115884783	115885076
Ighv1-15	ENSMUSG00000076693	12	115895567	115895988
Ighv1-18	ENSMUSG00000076695	12	115920885	115921276
Ighv1-19	ENSMUSG00000076696	12	115946859	115947292
Ighv1-20	ENSMUSG00000076697	12	115961983	115962416
Ighv1-22	ENSMUSG00000076698	12	115984484	115984917
Ighv1-23	ENSMUSG00000076699	12	116002664	116003085
Ighv1-24	ENSMUSG00000076700	12	116011139	116011432
Ighv1-26	ENSMUSG00000076701	12	116026583	116027016
Ighv1-30	ENSMUSG00000076694	12	116055310	116055601
Ighv1-31	ENSMUSG00000076702	12	116067475	116067768
Ighv1-33	ENSMUSG00000078971	12	116081862	116082154
Ighv1-34	ENSMUSG00000076703	12	116089401	116089834
Ighv1-36	ENSMUSG00000076704	12	116118099	116118532
Ighv1-37	ENSMUSG00000076705	12	116134449	116134882
Ighv1-39	ENSMUSG00000076706	12	116152810	116153243
Ighv1-42	ENSMUSG00000076707	12	116175324	116175617
Ighv1-43	ENSMUSG00000076708	12	116184161	116184454
Ighv1-47	ENSMUSG00000076709	12	116229319	116229612
Ighv1-49	ENSMUSG00000076710	12	116293434	116293727
Ighv8-5	ENSMUSG00000076711	12	116305787	116306207
Ighv1-50	ENSMUSG00000076712	12	116357959	116358391
Ighv1-52	ENSMUSG00000076713	12	116383698	116384130
Ighv1-53	ENSMUSG00000076714	12	116396614	116397046
Ighv8-6	ENSMUSG00000076715	12	116403988	116404288
Ighv1-54	ENSMUSG00000076716	12	116431886	116432319
Ighv1-55	ENSMUSG00000076717	12	116446306	116446738
Ighv1-56	ENSMUSG00000076718	12	116481013	116481306
Ighv8-8	ENSMUSG00000076719	12	116532289	116532709
Ighv1-58	ENSMUSG00000076720	12	116550377	116550807
Ighv1-59	ENSMUSG00000076721	12	116573293	116573725
Ighv1-61	ENSMUSG00000076722	12	116597351	116597783
Ighv1-73	ENSMUSG00000057610	12	117028913	117029095
Zfp386	ENSMUSG00000042063	12	117280562	117299060
Vipr2	ENSMUSG00000011171	12	117316196	117384734
Wdr60	ENSMUSG00000042050	12	117445523	117501498
Gm11027	ENSMUSG00000078984	12	117513859	117514085
Esyt2	ENSMUSG00000021171	12	117519695	117611569
D430020J02Rik	ENSMUSG00000091262	12	117643573	117664338
Ncapg2	ENSMUSG00000042029	12	117643875	117702004
Ptprn2	ENSMUSG00000056553	12	117724193	118516640
RP24-386J17.2	ENSMUSG00000093765	12	117341242	117377121
Gm17626	ENSMUSG00000091100	12	117286040	117290093
Ighv1-62-1	ENSMUSG00000090959	12	116625110	116625199
Ighv1-62-2	ENSMUSG00000091241	12	116684620	116684921
Ighv1-62-3	ENSMUSG00000076723	12	116699210	116699642
Ighv8-9	ENSMUSG00000076724	12	116706543	116706843
Ighv1-63	ENSMUSG00000076725	12	116733836	116734269
Ighv1-64	ENSMUSG00000076726	12	116745756	116746188
Ighv8-11	ENSMUSG00000076727	12	116805376	116805796
Ighv1-66	ENSMUSG00000076728	12	116831321	116831754
Ighv1-67	ENSMUSG00000076729	12	116842151	116842444
Ighv1-69	ENSMUSG00000076730	12	116861372	116861806
Ighv8-12	ENSMUSG00000076731	12	116886172	116886572
Ighv1-71	ENSMUSG00000091301	12	116980416	116980717
Ighv1-72	ENSMUSG00000076732	12	116996195	116996627
Ighv8-13	ENSMUSG00000076733	12	117003544	117003846
Gm16710	ENSMUSG00000076734	12	117040859	117041291
Ighv8-14	ENSMUSG00000091087	12	117046672	117046791
Ighv1-75	ENSMUSG00000076735	12	117072161	117072607
Ighv1-76	ENSMUSG00000091843	12	117086092	117086385
Ighv1-77	ENSMUSG00000092156	12	117100078	117100371
Ighv1-78	ENSMUSG00000091338	12	117106984	117107277
Ighv1-80	ENSMUSG00000076738	12	117150555	117150987
Ighv1-81	ENSMUSG00000076739	12	117158490	117158923
Ighv1-82	ENSMUSG00000076740	12	117190749	117191042
Ighv1-83	ENSMUSG00000076741	12	117202028	117202318
Ighv1-84	ENSMUSG00000076742	12	117218913	117219345
Ighv1-85	ENSMUSG00000076743	12	117238239	117238672
U6	ENSMUSG00000065685	12	117411786	117411892
U6	ENSMUSG00000084629	12	117715369	117715472
Mir153	ENSMUSG00000065538	12	118489290	118489358
Rapgef5	ENSMUSG00000041992	12	118754952	118995451
5S_rRNA	ENSMUSG00000089482	12	118812815	118812920
Cdca7l	ENSMUSG00000021175	12	119042762	119117179
Dnahc11	ENSMUSG00000018581	12	119116455	119437516
RP23-67O10.2	ENSMUSG00000093544	12	119072480	119072824
U7	ENSMUSG00000088593	12	119163110	119163175
Sp4	ENSMUSG00000025323	12	119473406	119539913
Sp8	ENSMUSG00000048562	12	120084802	120091051
Abcb5	ENSMUSG00000072791	12	120106297	120204894
7SK	ENSMUSG00000088797	12	119992027	119992225
U6	ENSMUSG00000065348	12	119743401	119743507
Itgb8	ENSMUSG00000025321	12	120396495	120477275
Macc1	ENSMUSG00000041886	12	120681883	120705407
Gm6768	ENSMUSG00000021908	12	120499451	120501328
Nudcd1	ENSMUSG00000038736	15	44206773	44259853
Eny2	ENSMUSG00000022338	15	44259657	44269231
Pkhd1l1	ENSMUSG00000038725	15	44289099	44428689
Ebag9	ENSMUSG00000022339	15	44451187	44472570
Sybu	ENSMUSG00000022340	15	44503405	44619609
A930017M01Rik	ENSMUSG00000090446	15	44715020	44715856
Kcnv1	ENSMUSG00000022342	15	44937830	44946480
A930017M01Rik	ENSMUSG00000060530	15	44712926	44714601
Gm5471	ENSMUSG00000058463	15	44803340	44803681
2310069G16Rik	ENSMUSG00000085947	15	44619328	44637373
SNORA17	ENSMUSG00000088756	15	44177196	44177321
U6	ENSMUSG00000065855	15	44264141	44264247
SNORA17	ENSMUSG00000077181	15	44195631	44195762
SNORA48	ENSMUSG00000089589	15	44779650	44779792
U6	ENSMUSG00000065312	15	45983244	45983350
U6	ENSMUSG00000089137	15	44772088	44772181
AC124746.1	ENSMUSG00000092643	15	46266354	46266415
4930548G14Rik	ENSMUSG00000051198	15	46457002	46457319
U7	ENSMUSG00000088679	15	46775933	46775994
Ncam2	ENSMUSG00000022762	16	81200942	81624530
Rpl21-ps5	ENSMUSG00000071475	16	83371496	83371978
U6	ENSMUSG00000070247	16	82543474	82543580
App	ENSMUSG00000022892	16	84954685	85173952
Cyyr1	ENSMUSG00000041134	16	85421778	85553642
Adamts1	ENSMUSG00000022893	16	85794072	85803358
Adamts5	ENSMUSG00000022894	16	85858415	85901370
Gm2541	ENSMUSG00000089698	16	85553478	85554188
SNORA17	ENSMUSG00000089252	16	86845715	86845839
N6amt1	ENSMUSG00000044442	16	87354430	87368987
Ltn1	ENSMUSG00000052299	16	87376896	87432851
Rwdd2b	ENSMUSG00000041079	16	87433652	87440818
Usp16	ENSMUSG00000025616	16	87454948	87483762
SNORA2	ENSMUSG00000065647	16	87419154	87419289
Cct8	ENSMUSG00000025613	16	87483571	87496118
B130034C11Rik	ENSMUSG00000093606	16	87496244	87504278
SNORA17	ENSMUSG00000077579	16	87528275	87528410
Rpl31-ps4	ENSMUSG00000090753	16	87549307	87549696
ORF63	ENSMUSG00000025610	16	87553575	87595581
U6	ENSMUSG00000064670	16	87621259	87621365
Bach1	ENSMUSG00000025612	16	87699190	87733591
2810407A14Rik	ENSMUSG00000055972	16	87784320	87793846
CT030723.1	ENSMUSG00000092692	16	87785488	87785579
SNORA17	ENSMUSG00000088684	16	87761801	87761888
Grik1	ENSMUSG00000022935	16	87896441	88289947
Cldn17	ENSMUSG00000055811	16	88506052	88507223
Cldn8	ENSMUSG00000050520	16	88561073	88563428
Krtap24-1	ENSMUSG00000050239	16	88610954	88612524
2310079G19Rik	ENSMUSG00000045331	16	88627033	88627911
Krtap26-1	ENSMUSG00000071471	16	88647069	88648041
Krtap27-1	ENSMUSG00000090515	16	88671291	88671899
2310061N02Rik	ENSMUSG00000050704	16	88707416	88708207
Krtap13-1	ENSMUSG00000056350	16	88729107	88729854
Krtap13	ENSMUSG00000050224	16	88750992	88751873
2310057N15Rik	ENSMUSG00000048830	16	88773426	88774451
Gm5965	ENSMUSG00000009047	16	88778141	88778773
2310034C09Rik	ENSMUSG00000068078	16	88759145	88759774
U6	ENSMUSG00000088283	16	88614772	88614855
Krtap15	ENSMUSG00000022931	16	88820460	88829729
Krtap16-2	ENSMUSG00000060691	16	88869163	88869655
Krtap16-1	ENSMUSG00000057650	16	88873910	88874514
Krtap16-5	ENSMUSG00000060469	16	88877758	88878283
Krtap16-4	ENSMUSG00000043982	16	88885031	88885334
Krtap8-2	ENSMUSG00000051802	16	88896213	88896695
Krtap16-10a	ENSMUSG00000048643	16	88924295	88924462
Krtap16-10b	ENSMUSG00000057174	16	88932049	88932509
Gm10229	ENSMUSG00000068075	16	89015572	89016091
Krtap6-1	ENSMUSG00000058172	16	89031944	89032537
Gm10228	ENSMUSG00000068074	16	89041166	89041697
Krtap16-8	ENSMUSG00000062400	16	89047545	89048144
1110025L11Rik	ENSMUSG00000068073	16	89063953	89064189
Krtap6-3	ENSMUSG00000057855	16	89084336	89084779
Gm6358	ENSMUSG00000068071	16	89141189	89141344
Krtap14	ENSMUSG00000074928	16	88825837	88826067
Krtap16-3	ENSMUSG00000062996	16	88962552	88963054
Gm10061	ENSMUSG00000059113	16	89151384	89151548
Gm9789	ENSMUSG00000044227	16	89158197	89158588
Gm7735	ENSMUSG00000068068	16	89169735	89169893
1110057P08Rik	ENSMUSG00000068067	16	89174980	89175437
Krtap20-2	ENSMUSG00000091039	16	89206106	89206633
Krtap16-7	ENSMUSG00000058368	16	89403272	89404019
Krtap8-1	ENSMUSG00000059632	16	89487619	89488197
Krtap7-1	ENSMUSG00000056706	16	89507949	89508568
Krtap6-2	ENSMUSG00000062433	16	89419855	89420322
U6	ENSMUSG00000084576	16	89451740	89451844
Rftn1	ENSMUSG00000039316	17	50131582	50329999
AY702103	ENSMUSG00000067103	17	50378729	50380849
Dazl	ENSMUSG00000010592	17	50418719	50432924
Plcl2	ENSMUSG00000038910	17	50648872	50827818
Gm7334	ENSMUSG00000044645	17	50837852	50839205
Tbc1d5	ENSMUSG00000023923	17	50872452	51318674
Daam2	ENSMUSG00000040260	17	49595347	49703662
Kif6	ENSMUSG00000023999	17	49754461	50049172
Gm16555	ENSMUSG00000090012	17	49956951	49961150
Gm16554	ENSMUSG00000090227	17	50034067	50035292
U4	ENSMUSG00000084583	17	51056250	51056366
Ccdc75	ENSMUSG00000050668	17	79234856	79247639
Eif2ak2	ENSMUSG00000024079	17	79251904	79281913
Sult6b1	ENSMUSG00000038045	17	79283278	79306332
1110001A16Rik	ENSMUSG00000062691	17	79315839	79320377
Cebpz	ENSMUSG00000024081	17	79318346	79336410
2410091C18Rik	ENSMUSG00000024082	17	79336475	79347392
Prkd3	ENSMUSG00000024070	17	79348745	79420156
Qpct	ENSMUSG00000024084	17	79451246	79489583
Cdc42ep3	ENSMUSG00000036533	17	79733365	79754431
Fam82a1	ENSMUSG00000036368	17	80014240	80081492
4921513D11Rik	ENSMUSG00000066944	17	80026017	80028021
Cyp1b1	ENSMUSG00000024087	17	80106234	80114401
Atl2	ENSMUSG00000059811	17	80247732	80295463
Hnrpll	ENSMUSG00000024095	17	80428827	80461674
Galm	ENSMUSG00000035473	17	80526811	80584441
Srsf7	ENSMUSG00000024097	17	80599429	80606629
Ttc39d	ENSMUSG00000046196	17	80606800	80617276
Gemin6	ENSMUSG00000055760	17	80623781	80627837
Dhx57	ENSMUSG00000035051	17	80637644	80689816
Morn2	ENSMUSG00000045257	17	80689552	80696813
Arhgef33	ENSMUSG00000054901	17	80706747	80788028
Gm10190	ENSMUSG00000066938	17	80772558	80772881
Sos1	ENSMUSG00000024241	17	80793092	80879793
Cdkl4	ENSMUSG00000033966	17	80922890	80963174
Map4k3	ENSMUSG00000024242	17	80979852	81127433
Gm16825	ENSMUSG00000085149	17	79281382	79291840
Gm6548	ENSMUSG00000091549	17	79250132	79251296
Gm9959	ENSMUSG00000054957	17	81127471	81127862
Gm17315	ENSMUSG00000091839	17	79754039	79757362
7SK	ENSMUSG00000088453	17	80595498	80595744
U6	ENSMUSG00000088276	17	80504277	80504382
n-R5s29	ENSMUSG00000064770	17	79258274	79258392
U6	ENSMUSG00000088183	17	80432854	80432949
Dcc	ENSMUSG00000060534	18	71418392	72510723
Mbd2	ENSMUSG00000024513	18	70727843	70785785
Tcf4	ENSMUSG00000053477	18	69503800	69847621
4930448D08Rik	ENSMUSG00000086824	18	70129331	70132020
1700061H18Rik	ENSMUSG00000084948	18	70102974	70129263
Ccdc68	ENSMUSG00000038903	18	70085080	70129138
Rab27b	ENSMUSG00000024511	18	70138785	70301259
2310002L13Rik	ENSMUSG00000024512	18	70400083	70404052
4930503L19Rik	ENSMUSG00000044906	18	70612794	70632134
Stard6	ENSMUSG00000079608	18	70632108	70660720
Poli	ENSMUSG00000038425	18	70668334	70690274
Y_RNA	ENSMUSG00000064706	18	69937590	69937699
Olfr1503-ps1	ENSMUSG00000058078	19	13951941	13952743
Gm5513	ENSMUSG00000063586	19	15034039	15035256
Olfr1504	ENSMUSG00000059105	19	13961711	13962795
Olfr1501	ENSMUSG00000057270	19	13912714	13913661
Olfr1502	ENSMUSG00000056858	19	13936285	13937235
Olfr1499	ENSMUSG00000045395	19	13889097	13890148
Olfr1497	ENSMUSG00000044040	19	13869155	13870099
Olfr1500	ENSMUSG00000054526	19	13901925	13902949
Olfr1505	ENSMUSG00000062314	19	13993432	13994534
Tle4	ENSMUSG00000024642	19	14522562	14672473
U6	ENSMUSG00000065323	19	15754494	15754600
U4	ENSMUSG00000084675	19	14792848	14792970
Psat1	ENSMUSG00000024640	19	15979168	16021827
Gm3329	ENSMUSG00000090147	19	16018100	16018655

## Sheet: wk14IgG1-Prn
Gene Name	Ensembl Gene ID	Chromosome	Start	End
1700066M21Rik	ENSMUSG00000038323	1	57434464	57442267
Ndufb3	ENSMUSG00000026032	1	58643228	58652808
Orc2	ENSMUSG00000026037	1	58519615	58561953
9430016H08Rik	ENSMUSG00000025971	1	57463172	57474797
Fam126b	ENSMUSG00000038174	1	58579650	58643167
Gm17234	ENSMUSG00000091283	1	57966679	57973955
Gm15759	ENSMUSG00000089822	1	58310961	58372500
Gm15834	ENSMUSG00000085054	1	58561992	58580074
Cdk15	ENSMUSG00000026023	1	59313750	59409837
Aox3	ENSMUSG00000064294	1	58169974	58257542
Als2	ENSMUSG00000026024	1	59219770	59294075
Gm10068	ENSMUSG00000059647	1	58703452	58705161
Als2cr12	ENSMUSG00000047528	1	58714961	58752833
Cflar	ENSMUSG00000026031	1	58768352	58815728
Casp8	ENSMUSG00000026029	1	58852218	58904347
Trak2	ENSMUSG00000026028	1	58957293	59030274
Stradb	ENSMUSG00000026027	1	59030366	59052559
Als2cr11	ENSMUSG00000047383	1	59053967	59060287
Gm17570	ENSMUSG00000090590	1	59060795	59062069
Als2cr11	ENSMUSG00000072295	1	59107350	59151744
Als2cr4	ENSMUSG00000038079	1	59157438	59177203
Mpp4	ENSMUSG00000079550	1	59177780	59220233
Ppil3	ENSMUSG00000026035	1	58487838	58502330
Aox4	ENSMUSG00000038242	1	58267241	58325441
1110034B05Rik	ENSMUSG00000048495	1	57445081	57463945
Nif3l1	ENSMUSG00000026036	1	58501995	58538660
4930558J18Rik	ENSMUSG00000084958	1	57416066	57434348
Spats2l	ENSMUSG00000038305	1	57831006	58005241
Kctd18	ENSMUSG00000054770	1	58011945	58075800
Sgol2	ENSMUSG00000026039	1	58052815	58082743
Aox1	ENSMUSG00000063558	1	58086775	58163257
Aox3l1	ENSMUSG00000079554	1	58335170	58436108
Bzw1	ENSMUSG00000051223	1	58449980	58463392
Clk1	ENSMUSG00000026034	1	58467033	58480910
SNORA17	ENSMUSG00000077776	1	57479088	57479217
U6	ENSMUSG00000064701	1	58523359	58523465
U1	ENSMUSG00000088353	1	57524714	57524870
SNORA17	ENSMUSG00000089275	1	58211825	58211932
SNORA17	ENSMUSG00000077616	1	59127832	59127962
snoU13	ENSMUSG00000089176	1	57922583	57922684
Lancl1	ENSMUSG00000026000	1	67047091	67085446
Cps1	ENSMUSG00000025991	1	67169600	67277833
Erbb4	ENSMUSG00000062209	1	68078760	69154633
Gm15668	ENSMUSG00000086204	1	67295774	67370183
Kif22-ps	ENSMUSG00000082473	1	67631627	67633610
Gm15669	ENSMUSG00000085075	1	67839055	67851898
Gm15671	ENSMUSG00000087329	1	68051660	68072470
Gm15670	ENSMUSG00000083795	1	68339854	68340300
AC101833.1	ENSMUSG00000093213	1	68020250	68020351
AC101752.1	ENSMUSG00000093566	1	67663549	67663626
SNORA17	ENSMUSG00000077745	1	67303798	67303926
U6atac	ENSMUSG00000080539	1	68431516	68431609
Gm16076	ENSMUSG00000087514	1	69138487	69153314
Gm8840	ENSMUSG00000084332	1	69177488	69177873
Ikzf2	ENSMUSG00000025997	1	69577788	69732534
Spag16	ENSMUSG00000053153	1	69873562	70771706
7SK	ENSMUSG00000089345	1	69968047	69968321
Gm5263	ENSMUSG00000090323	1	148267564	148268004
Fam5c	ENSMUSG00000035131	1	148342759	148749602
Gm9931	ENSMUSG00000053988	1	149127888	149129072
Gm15583	ENSMUSG00000080078	1	148572711	148576220
A230059L01Rik	ENSMUSG00000087627	1	148650095	148653152
Gm15584	ENSMUSG00000085822	1	148656961	148688826
Pla2g4a	ENSMUSG00000056220	1	151676748	151808420
Ptgs2	ENSMUSG00000032487	1	151947254	151955140
Pdc	ENSMUSG00000006007	1	152166547	152181035
BC003331	ENSMUSG00000006010	1	152208435	152240210
Tpr	ENSMUSG00000006005	1	152239968	152297065
Prg4	ENSMUSG00000006014	1	152296542	152313295
Hmcn1	ENSMUSG00000066842	1	152410657	152840565
Ivns1abp	ENSMUSG00000023150	1	153191628	153211575
1200016B10Rik	ENSMUSG00000052748	1	153214829	153275585
1190005F20Rik	ENSMUSG00000053286	1	153275778	153305312
Rnf2	ENSMUSG00000026484	1	153316536	153347953
Fam129a	ENSMUSG00000026483	1	153418316	153569069
Edem3	ENSMUSG00000043019	1	153602504	153669458
Gm17311	ENSMUSG00000091113	1	152006173	152012078
7530420F21Rik	ENSMUSG00000084952	1	151922003	151947004
Gm15453	ENSMUSG00000081535	1	152112665	152113129
Ska2l-ps	ENSMUSG00000057399	1	152396447	152396809
RP23-454G7.1	ENSMUSG00000093650	1	152472395	152630629
Gm10138	ENSMUSG00000063886	1	153191499	153191866
U6	ENSMUSG00000065624	1	152909134	152909240
U2	ENSMUSG00000088498	1	153107954	153108044
n-R5s219	ENSMUSG00000077516	1	151688660	151688791
Y_RNA	ENSMUSG00000089221	1	153160677	153160758
Uhmk1	ENSMUSG00000026667	1	172123551	172145528
4930500M09Rik	ENSMUSG00000044306	1	172144991	172145687
Sh2d1b2	ENSMUSG00000073494	1	172162880	172183739
Sh2d1b1	ENSMUSG00000026673	1	172207507	172216900
Gm7694	ENSMUSG00000079188	1	172231277	172232958
Nos1ap	ENSMUSG00000038473	1	172232799	172519992
1700015E13Rik	ENSMUSG00000042800	1	172238934	172242256
Olfml2b	ENSMUSG00000038463	1	172574663	172612920
Atf6	ENSMUSG00000026663	1	172634588	172797902
Dusp12	ENSMUSG00000026659	1	172803629	172815671
Fcrlb	ENSMUSG00000070524	1	172837404	172843072
Fcrla	ENSMUSG00000038421	1	172847707	172857714
Fcgr2b	ENSMUSG00000026656	1	172890689	172906678
Fcgr4	ENSMUSG00000059089	1	172949051	172959892
Fcgr3	ENSMUSG00000059498	1	172981300	172995066
1700009P17Rik	ENSMUSG00000026649	1	173044049	173057098
Sdhc	ENSMUSG00000058076	1	173057296	173080734
Mpz	ENSMUSG00000056569	1	173080842	173091261
Pcp4l1	ENSMUSG00000038370	1	173103393	173126399
Nr1i3	ENSMUSG00000005677	1	173144101	173150832
Tomm40l	ENSMUSG00000005674	1	173147933	173152645
Apoa2	ENSMUSG00000005681	1	173155185	173156510
Fcer1g	ENSMUSG00000058715	1	173159703	173164496
Ndufs2	ENSMUSG00000013593	1	173164984	173177253
Adamts4	ENSMUSG00000006403	1	173180552	173190768
B4galt3	ENSMUSG00000052423	1	173200459	173207027
Ppox	ENSMUSG00000062729	1	173206121	173211317
Usp21	ENSMUSG00000053483	1	173212076	173218122
Ufc1	ENSMUSG00000062963	1	173218694	173225155
Rpl27-ps1	ENSMUSG00000079137	1	173235215	173235625
Dedd	ENSMUSG00000013973	1	173259276	173272462
Nit1	ENSMUSG00000013997	1	173268139	173275777
Pfdn2	ENSMUSG00000006412	1	173275801	173289385
Klhdc9	ENSMUSG00000045259	1	173288577	173290929
Pvrl4	ENSMUSG00000006411	1	173300230	173318729
Arhgap30	ENSMUSG00000048865	1	173319085	173340429
Usf1	ENSMUSG00000026641	1	173341444	173349273
Tstd1	ENSMUSG00000091166	1	173349164	173350483
F11r	ENSMUSG00000038235	1	173367666	173394734
B930036N10Rik	ENSMUSG00000091993	1	173432927	173434242
Alyref2	ENSMUSG00000060244	1	173433609	173434881
Gm9765	ENSMUSG00000038218	1	173445364	173447053
Itln1	ENSMUSG00000038209	1	173448253	173465425
Cd244	ENSMUSG00000004709	1	173489324	173515449
Ly9	ENSMUSG00000004707	1	173518755	173537541
Slamf7	ENSMUSG00000038179	1	173562534	173579149
Cd48	ENSMUSG00000015355	1	173612140	173635389
Slamf1	ENSMUSG00000015316	1	173697258	173731315
Cd84	ENSMUSG00000038147	1	173769828	173820849
Gm10521	ENSMUSG00000073492	1	173825795	173828368
Slamf6	ENSMUSG00000015314	1	173847646	173879083
Vangl2	ENSMUSG00000026556	1	173931091	173958575
Nhlh1	ENSMUSG00000051251	1	173982423	173987704
Ncstn	ENSMUSG00000003458	1	173996144	174012926
Copa	ENSMUSG00000026553	1	174012660	174052461
Pex19	ENSMUSG00000003464	1	174056886	174066624
Dcaf8	ENSMUSG00000026554	1	174078146	174126524
Gm9929	ENSMUSG00000053925	1	172798776	172811852
Gm2962	ENSMUSG00000089838	1	172855440	172855775
Gm15431	ENSMUSG00000059058	1	173641219	173641413
Gm10171	ENSMUSG00000089803	1	174074403	174075032
Gm17520	ENSMUSG00000092117	1	173353316	173367449
U6	ENSMUSG00000064448	1	172762896	172763002
U5	ENSMUSG00000065033	1	173433179	173433294
U6	ENSMUSG00000065390	1	173663430	173663536
SNORA40	ENSMUSG00000087747	1	173238178	173238268
U6	ENSMUSG00000064611	1	172681848	172681954
U6	ENSMUSG00000088291	1	173662191	173662245
U1	ENSMUSG00000065905	1	172958096	172958260
Pea15a	ENSMUSG00000013698	1	174126859	174136935
Casq1	ENSMUSG00000007122	1	174140025	174150026
Atp1a4	ENSMUSG00000007107	1	174153644	174188545
Gm17224	ENSMUSG00000092085	1	174143152	174143811
Igsf8	ENSMUSG00000038034	1	174191772	174249972
Atp1a2	ENSMUSG00000007097	1	174201840	174228195
Kcnj9	ENSMUSG00000038026	1	174251164	174259394
Kcnj10	ENSMUSG00000044708	1	174271341	174304216
Pigm	ENSMUSG00000050229	1	174306662	174314230
Slamf9	ENSMUSG00000026548	1	174405489	174408706
Igsf9	ENSMUSG00000037995	1	174411919	174429009
Tagln2	ENSMUSG00000026547	1	174430178	174437511
Ccdc19	ENSMUSG00000026546	1	174451175	174476001
Vsig8	ENSMUSG00000049598	1	174486069	174493848
Slamf8	ENSMUSG00000053318	1	174511508	174520699
Fcrl6	ENSMUSG00000070504	1	174526771	174532682
Dusp23	ENSMUSG00000026544	1	174560900	174563105
Crp	ENSMUSG00000037942	1	174628187	174630097
Apcs	ENSMUSG00000026542	1	174824093	174825185
Olfr16	ENSMUSG00000037924	1	174886899	174887948
Olfr1408	ENSMUSG00000062527	1	175060331	175061367
Olfr1406	ENSMUSG00000058981	1	175113573	175114635
Olfr218	ENSMUSG00000046643	1	175133489	175134430
Olfr1404	ENSMUSG00000049456	1	175145738	175146771
Fcer1a	ENSMUSG00000005339	1	175151402	175157360
Olfr418-ps1	ENSMUSG00000049605	1	175200278	175201268
Gm11062	ENSMUSG00000079180	1	175204592	175207853
Darc	ENSMUSG00000037872	1	175262017	175263634
Cadm3	ENSMUSG00000005338	1	175264385	175297826
Aim2	ENSMUSG00000037860	1	175281010	175396171
4933439K11Rik	ENSMUSG00000085184	1	174468264	174488260
Olfr1407-ps1	ENSMUSG00000066680	1	175080262	175080503
7SK	ENSMUSG00000088813	1	174614646	174614972
SNORA17	ENSMUSG00000077252	1	174866343	174866465
U6	ENSMUSG00000070182	1	174773665	174773769
Gm4955	ENSMUSG00000037849	1	175398640	175421172
BC094916	ENSMUSG00000070501	1	175449848	175466088
Pydc4	ENSMUSG00000073491	1	175497204	175529405
Pyhin1	ENSMUSG00000043263	1	175560990	175578059
Pydc3	ENSMUSG00000066677	1	175604042	175628523
AI607873	ENSMUSG00000073490	1	175653814	175671878
Ifi204	ENSMUSG00000073489	1	175677424	175697050
Mndal	ENSMUSG00000090272	1	175787352	175872622
Mnda	ENSMUSG00000026536	1	175826486	175843053
Ifi203	ENSMUSG00000039997	1	175850538	175872803
Ifi202b	ENSMUSG00000026535	1	175892700	175912975
Ifi205	ENSMUSG00000054203	1	175942129	175961886
Olfr433	ENSMUSG00000045381	1	175972064	175973067
Olfr432	ENSMUSG00000047048	1	175980506	175981444
Olfr430	ENSMUSG00000050134	1	175999431	176000384
Olfr429	ENSMUSG00000049528	1	176019169	176020111
Olfr427	ENSMUSG00000059371	1	176029591	176030538
Olfr231	ENSMUSG00000046486	1	176047222	176048145
Olfr424	ENSMUSG00000051528	1	176066877	176067824
Olfr421	ENSMUSG00000091950	1	176081612	176082661
Olfr420	ENSMUSG00000055033	1	176088853	176089898
Spna1	ENSMUSG00000026532	1	176102907	176178581
Olfr419	ENSMUSG00000050788	1	176180020	176181107
1810030J14Rik	ENSMUSG00000026531	1	176260649	176263004
Olfr417	ENSMUSG00000066672	1	176299050	176299979
Olfr248	ENSMUSG00000059503	1	176321177	176322186
Olfr414	ENSMUSG00000051509	1	176360561	176361515
Olfr220	ENSMUSG00000066671	1	176378756	176379733
Fmn2	ENSMUSG00000028354	1	176431956	176752848
Grem2	ENSMUSG00000050069	1	176763916	176851950
Rgs7	ENSMUSG00000026527	1	176989867	177421261
Gm16340	ENSMUSG00000090222	1	175705968	175732851
Fh1	ENSMUSG00000026526	1	177530505	177555766
Kmo	ENSMUSG00000039783	1	177550512	177592247
Opn3	ENSMUSG00000026525	1	177592552	177622907
Chml	ENSMUSG00000078185	1	177616619	177618484
Wdr64	ENSMUSG00000026523	1	177628724	177745865
Exo1	ENSMUSG00000039748	1	177810909	177841527
Pld5	ENSMUSG00000055214	1	177892437	178205443
B020018G12Rik	ENSMUSG00000078184	1	177907908	177909245
U6	ENSMUSG00000065666	1	177834676	177834782
U2	ENSMUSG00000077794	1	177730645	177730820
Tlr5	ENSMUSG00000079164	1	184884919	184906175
Gm8214	ENSMUSG00000090533	1	185505657	185506073
Dusp10	ENSMUSG00000039384	1	185837181	185899515
1700056E22Rik	ENSMUSG00000044854	1	185856911	185857453
Hlx	ENSMUSG00000039377	1	186551019	186556498
Mosc1	ENSMUSG00000026621	1	186610655	186635192
Mosc2	ENSMUSG00000073481	1	186636947	186670330
C130074G19Rik	ENSMUSG00000039349	1	186695805	186707097
Mark1	ENSMUSG00000026620	1	186720322	186823428
Rpl21-ps1	ENSMUSG00000059483	1	186441127	186441609
4930488B22Rik	ENSMUSG00000092578	1	186536376	186542868
U6	ENSMUSG00000089057	1	186403988	186404085
7SK	ENSMUSG00000088562	1	186681959	186682291
Mir1981	ENSMUSG00000088559	1	186646286	186646367
Gm13461	ENSMUSG00000081999	2	41842685	41844369
Gm13463	ENSMUSG00000081085	2	41980141	41980373
Lrp1b	ENSMUSG00000049252	2	40450768	42509118
SNORA17	ENSMUSG00000077351	2	42664555	42664686
Gm13464	ENSMUSG00000080994	2	43373986	43374918
Kynu	ENSMUSG00000026866	2	43410849	43538235
Tspan18	ENSMUSG00000027217	2	93041917	93174662
Tspan18	ENSMUSG00000023461	2	93151420	93174663
Cd82	ENSMUSG00000027215	2	93259268	93303297
Gm10803	ENSMUSG00000075024	2	93400725	93404518
Alx4	ENSMUSG00000040310	2	93482541	93521496
Ext2	ENSMUSG00000027198	2	93535788	93662725
Accs	ENSMUSG00000040272	2	93673624	93690100
Accsl	ENSMUSG00000075023	2	93695518	93709314
Alkbh3	ENSMUSG00000040174	2	93820707	93850964
Hsd17b12	ENSMUSG00000027195	2	93872846	93998121
Ttc17	ENSMUSG00000027194	2	94140924	94246846
Api5	ENSMUSG00000027193	2	94251839	94278293
Gm13807	ENSMUSG00000085852	2	93243704	93257987
Gm10804	ENSMUSG00000075025	2	93292976	93310028
Gm13818	ENSMUSG00000081353	2	93634727	93635241
Gm1335	ENSMUSG00000083009	2	93780456	93781035
Gm13889	ENSMUSG00000087006	2	93795967	93797684
Gm13889	ENSMUSG00000075021	2	93796536	93797284
4921507L20Rik	ENSMUSG00000027196	2	93820191	93823732
E530001K10Rik	ENSMUSG00000075020	2	94092036	94104915
Itpa-ps1	ENSMUSG00000081476	2	94224659	94225255
2810002D19Rik	ENSMUSG00000045464	2	94246308	94251839
Gm13788	ENSMUSG00000083204	2	94430978	94431578
Gm13793	ENSMUSG00000087069	2	94569171	94570895
AL683878.1	ENSMUSG00000093033	2	94024184	94024287
AL732472.1	ENSMUSG00000078012	2	93738199	93738290
5S_rRNA	ENSMUSG00000089073	2	93226884	93226986
SNORA17	ENSMUSG00000077678	2	94462115	94462245
Mir129-2	ENSMUSG00000065511	2	94081521	94081610
SNORA17	ENSMUSG00000077281	2	94632362	94632493
Mir670	ENSMUSG00000076335	2	94101457	94101556
Gm13795	ENSMUSG00000080739	2	95164847	95165141
Gm13794	ENSMUSG00000084906	2	95234399	95237808
Gm13796	ENSMUSG00000083739	2	95515934	95516246
Gm13798	ENSMUSG00000081757	2	95517874	95518012
Gm13797	ENSMUSG00000083846	2	95538074	95538193
Gm13799	ENSMUSG00000087537	2	95678245	95680751
Gm13800	ENSMUSG00000083797	2	95911686	95911851
Gm15952	ENSMUSG00000085655	3	35831967	35841639
A330050B17Rik	ENSMUSG00000086392	3	35898755	35924028
Gm11548	ENSMUSG00000085320	3	36398726	36405731
Gm11549	ENSMUSG00000085007	3	36413979	36420735
Gm11550	ENSMUSG00000083388	3	36438305	36439003
Gm12377	ENSMUSG00000082548	3	36593724	36593975
Dcun1d1	ENSMUSG00000027708	3	35791900	35836367
Atp11b	ENSMUSG00000037400	3	35653056	35755196
Mccc1	ENSMUSG00000027709	3	35858234	35899600
Ccdc144b	ENSMUSG00000047696	3	35906169	35952469
Acad9	ENSMUSG00000027710	3	35964901	35993866
D3Ertd254e	ENSMUSG00000033883	3	36058444	36065142
Qrfpr	ENSMUSG00000058400	3	36078346	36121197
Anxa5	ENSMUSG00000027712	3	36347847	36374765
1810062G17Rik	ENSMUSG00000027713	3	36375057	36380898
Exosc9	ENSMUSG00000027714	3	36451528	36464651
Ccna2	ENSMUSG00000027715	3	36463788	36471072
Bbs7	ENSMUSG00000037325	3	36472064	36512399
Trpc3	ENSMUSG00000027716	3	36519404	36589089
AC158547.1	ENSMUSG00000093499	3	35224536	35224627
U6	ENSMUSG00000064834	3	35634295	35634399
Gm12376	ENSMUSG00000084027	3	36723274	36723880
4932438A13Rik	ENSMUSG00000037270	3	36762028	36951955
Gm12531	ENSMUSG00000086090	3	36951137	36958957
Adad1	ENSMUSG00000027719	3	36962449	37020846
Gm12582	ENSMUSG00000081705	3	36976577	36977273
Gm12583	ENSMUSG00000082878	3	37007096	37007948
Gm12584	ENSMUSG00000083857	3	37015656	37016760
Gm12532	ENSMUSG00000084754	3	37081807	37087515
Gm13621	ENSMUSG00000081634	3	37098901	37099901
Gm12533	ENSMUSG00000083575	3	37114762	37114899
Gm12534	ENSMUSG00000086517	3	37130255	37131391
Gm12540	ENSMUSG00000083353	3	37225994	37226312
Gm12541	ENSMUSG00000054779	3	37234254	37248662
Gm12563	ENSMUSG00000083696	3	37380414	37380515
Gm12564	ENSMUSG00000080723	3	37455105	37455425
Gm12565	ENSMUSG00000081093	3	37498346	37498994
Il2	ENSMUSG00000027720	3	37019445	37024881
Il21	ENSMUSG00000027718	3	37121681	37131540
Cetn4	ENSMUSG00000045031	3	37206671	37211630
Fgf2	ENSMUSG00000037225	3	37211441	37304299
Bbs12	ENSMUSG00000051444	3	37211476	37220375
Nudt6	ENSMUSG00000050174	3	37303832	37319133
Spata5	ENSMUSG00000027722	3	37318818	37478018
AL691478.1	ENSMUSG00000076974	3	37155706	37155815
4930594O21Rik	ENSMUSG00000085677	3	37512835	37514198
Gm15450	ENSMUSG00000063001	3	37613662	37614100
Spry1	ENSMUSG00000037211	3	37538869	37543520
Gm5148	ENSMUSG00000058174	3	37613112	37623412
Gm7799	ENSMUSG00000087457	3	37858534	37859009
Rpl21-ps10	ENSMUSG00000064315	3	38006330	38006877
Ankrd50	ENSMUSG00000044864	3	38348183	38383766
AC162799.1	ENSMUSG00000092986	3	38166760	38167006
SNORA17	ENSMUSG00000077728	3	37894027	37894157
SNORA17	ENSMUSG00000089123	3	37701466	37701574
AC114901.1	ENSMUSG00000076385	3	38457031	38457136
C230034O21Rik	ENSMUSG00000086181	3	38773492	38787181
Fat4	ENSMUSG00000046743	3	38785862	38910907
Gm9845	ENSMUSG00000050533	3	39257180	39257827
n-R5s195	ENSMUSG00000064825	3	39534886	39535004
U1	ENSMUSG00000065945	3	39565210	39565369
Arsj	ENSMUSG00000046561	3	126066745	126143292
Camk2d	ENSMUSG00000053819	3	126299220	126547972
Ank2	ENSMUSG00000032826	3	126624525	127111949
Gm4392	ENSMUSG00000078164	3	127201581	127201919
Larp7	ENSMUSG00000027968	3	127239872	127256266
4930422G04Rik	ENSMUSG00000051278	3	127256407	127320939
Neurog2	ENSMUSG00000027967	3	127336054	127338549
Alpk1	ENSMUSG00000028028	3	127373317	127483445
Tifa	ENSMUSG00000046688	3	127492790	127535053
Ap1ar	ENSMUSG00000074238	3	127510182	127540410
5730508B09Rik	ENSMUSG00000050549	3	127572606	127599241
Gm10650	ENSMUSG00000074237	3	127741612	127743579
Gm17225	ENSMUSG00000090427	3	126135801	126142187
Gm15551	ENSMUSG00000086679	3	126370247	126371950
Gm16238	ENSMUSG00000089988	3	127394853	127395440
Gm16958	ENSMUSG00000087227	3	126864223	126871206
SNORA17	ENSMUSG00000077617	3	126708287	126708418
7SK	ENSMUSG00000087726	3	125855374	125855641
Mir302d	ENSMUSG00000065447	3	127248542	127248607
Mir302a	ENSMUSG00000065552	3	127248414	127248482
Mir367	ENSMUSG00000065413	3	127248651	127248725
Mir302c	ENSMUSG00000065482	3	127248281	127248348
5S_rRNA	ENSMUSG00000088537	3	127434512	127434608
Mir302b	ENSMUSG00000076252	3	127248146	127248219
Pdlim5	ENSMUSG00000028273	3	141903568	142058630
Gbp5	ENSMUSG00000040264	3	142159864	142185308
Gbp7	ENSMUSG00000040253	3	142193302	142213047
Gbp3	ENSMUSG00000028268	3	142223016	142236173
Gbp1	ENSMUSG00000028269	3	142257811	142282143
Gbp2	ENSMUSG00000028270	3	142283566	142300972
Ccbl2	ENSMUSG00000040213	3	142364015	142407874
Gtf2b	ENSMUSG00000028271	3	142428190	142446567
Pkn2	ENSMUSG00000004591	3	142453866	142544968
Gm2574	ENSMUSG00000078162	3	142625525	142626756
Lmo4	ENSMUSG00000028266	3	143851494	143868184
Gm15540	ENSMUSG00000086561	3	142406625	142407645
9530052C20Rik	ENSMUSG00000090913	3	142545459	142557608
SNORA4	ENSMUSG00000088851	3	143337907	143338031
SNORA17	ENSMUSG00000087795	3	142458066	142458158
U6	ENSMUSG00000065130	3	142435936	142436040
Hs2st1	ENSMUSG00000040151	3	144094067	144233145
Lphn2	ENSMUSG00000028184	3	148478550	148652280
Gm9912	ENSMUSG00000053583	3	148848115	148848459
Gm10287	ENSMUSG00000070342	3	148884657	148888709
U6	ENSMUSG00000089269	3	149003867	149003972
U6	ENSMUSG00000065270	3	148691896	148692002
SNORA17	ENSMUSG00000077441	3	148017051	148017182
Gipc2	ENSMUSG00000039131	3	151756497	151829194
Dnajb4	ENSMUSG00000028035	3	151841475	151873243
Fubp1	ENSMUSG00000028034	3	151873422	151899794
Nexn	ENSMUSG00000039103	3	151899950	151929284
Fam73a	ENSMUSG00000054942	3	151936423	152003371
Usp33	ENSMUSG00000025437	3	152009442	152056576
Zzz3	ENSMUSG00000039068	3	152058437	152125790
Ak5	ENSMUSG00000039058	3	152125779	152331104
Pigk	ENSMUSG00000039047	3	152377064	152643372
St6galnac5	ENSMUSG00000039037	3	152480045	152645210
St6galnac3	ENSMUSG00000052544	3	152868369	153388026
5730460C07Rik	ENSMUSG00000062046	3	153452269	153455051
Asb17	ENSMUSG00000038997	3	153507173	153518046
Msh4	ENSMUSG00000005493	3	153520111	153569102
Rabggtb	ENSMUSG00000038975	3	153570253	153575930
Acadm	ENSMUSG00000062908	3	153585321	153607596
Slc44a5	ENSMUSG00000028360	3	153636400	153934686
Gm16198	ENSMUSG00000084343	3	151816411	151817080
Rpl29-ps1	ENSMUSG00000090095	3	152443738	152445025
Gm16232	ENSMUSG00000090040	3	152539015	152539181
Gm16213	ENSMUSG00000090017	3	152583204	152584363
Gm16231	ENSMUSG00000090163	3	152606277	152606908
Gm10042	ENSMUSG00000058508	3	153448017	153448098
2510003D18Rik	ENSMUSG00000086438	3	153513337	153515388
AI115009	ENSMUSG00000085901	3	152329877	152344396
SNORA17	ENSMUSG00000088764	3	153527771	153527895
Snord45c	ENSMUSG00000065463	3	153575089	153575168
Snord45b	ENSMUSG00000064731	3	153573527	153573597
AC087184.1	ENSMUSG00000093463	3	153557665	153557735
SNORA17	ENSMUSG00000089237	3	153371875	153371990
SNORD45	ENSMUSG00000065738	3	153574574	153574654
SNORA17	ENSMUSG00000077174	3	153494134	153494256
7SK	ENSMUSG00000089376	3	153284666	153284933
Tmeff1	ENSMUSG00000028347	4	48598046	48676003
Murc	ENSMUSG00000028348	4	48676386	48686374
E130309F12Rik	ENSMUSG00000063446	4	49072145	49353131
Acnat2	ENSMUSG00000060317	4	49392712	49421023
Acnat1	ENSMUSG00000070985	4	49459977	49486784
Baat	ENSMUSG00000039653	4	49502294	49519429
Mrpl50	ENSMUSG00000044018	4	49525468	49533965
Zfp189	ENSMUSG00000039634	4	49534048	49544389
Aldob	ENSMUSG00000028307	4	49548867	49562418
2810432L12Rik	ENSMUSG00000039611	4	49597378	49610748
Rnf20	ENSMUSG00000028309	4	49644878	49669759
Grin3a	ENSMUSG00000039579	4	49674483	49858616
Ppp3r2	ENSMUSG00000028310	4	49691619	49694896
Gm12439	ENSMUSG00000080850	4	48688028	48688392
Gm12438	ENSMUSG00000083091	4	48758387	48758722
Gm12437	ENSMUSG00000082384	4	48820009	48820263
Gm12436	ENSMUSG00000084787	4	48911465	48976109
Gm12442	ENSMUSG00000083869	4	48985850	48986187
Gm12453	ENSMUSG00000081902	4	49355120	49355450
Rbpsuh-ps1	ENSMUSG00000081770	4	49363394	49364399
Gm12451	ENSMUSG00000082725	4	49408984	49420604
Gm12452	ENSMUSG00000081380	4	49425179	49425509
Gm12459	ENSMUSG00000083153	4	49759603	49760118
Gm12458	ENSMUSG00000081120	4	50063781	50064275
AL807771.1	ENSMUSG00000093240	4	48775723	48775834
SNORA17	ENSMUSG00000077308	4	50299618	50299749
SNORA17	ENSMUSG00000077417	4	48909371	48909495
U6	ENSMUSG00000064782	4	49302170	49302275
U6	ENSMUSG00000084479	4	49487179	49487282
Cylc2	ENSMUSG00000039555	4	51229550	51242800
Gm12460	ENSMUSG00000084116	4	51202979	51203335
Amd-ps4	ENSMUSG00000019836	4	51265897	51266899
Gm17527	ENSMUSG00000091678	4	51267042	51267235
Gm11237	ENSMUSG00000066136	4	73268913	73288075
Gm11236	ENSMUSG00000073819	4	73284035	73288075
Gm11238	ENSMUSG00000073818	4	73299134	73303177
Gm11239	ENSMUSG00000073817	4	73314258	73318301
Gm428	ENSMUSG00000070946	4	73329420	73333462
Rasef	ENSMUSG00000043003	4	73360483	73436613
Gm11758	ENSMUSG00000078663	4	73518123	73522170
Gm11757	ENSMUSG00000078662	4	73532970	73537016
Gm13871	ENSMUSG00000078661	4	73547811	73551857
Gm11756	ENSMUSG00000078660	4	73562632	73566664
2310002L09Rik	ENSMUSG00000028396	4	73585275	73596750
Frmd3	ENSMUSG00000049122	4	73659338	73848118
Kdm4c	ENSMUSG00000028397	4	73888401	74051764
3110001D03Rik	ENSMUSG00000028398	4	74923258	74924209
Gm11240	ENSMUSG00000085034	4	73437150	73444276
Gm13867	ENSMUSG00000083530	4	73510301	73510996
Gm11760	ENSMUSG00000081048	4	73690292	73691087
Gm11405	ENSMUSG00000083767	4	73874101	73875656
A230083N12Rik	ENSMUSG00000085482	4	73896228	73897618
Gm11254	ENSMUSG00000081438	4	74309587	74310239
Gm11258	ENSMUSG00000083659	4	74334011	74335228
Gm11253	ENSMUSG00000082533	4	74727404	74727604
Gm11257	ENSMUSG00000084311	4	74774616	74774930
Gm12912	ENSMUSG00000081067	4	74793513	74794893
Gm11255	ENSMUSG00000083224	4	74970405	74971584
Gm11259	ENSMUSG00000084026	4	75026664	75027378
SNORA63	ENSMUSG00000065884	4	74926530	74926659
SNORA17	ENSMUSG00000077496	4	74281123	74281254
Gm11256	ENSMUSG00000084253	4	75500422	75501250
Gm11241	ENSMUSG00000081844	4	75548164	75549059
Ptprd	ENSMUSG00000028399	4	75587142	77857865
5830433M19Rik	ENSMUSG00000028578	4	94166772	94223487
Gm10306	ENSMUSG00000070900	4	94223237	94223769
Plaa	ENSMUSG00000028577	4	94234205	94269935
Ift74	ENSMUSG00000028576	4	94281182	94359920
Lrrc19	ENSMUSG00000049799	4	94303344	94316835
Gm17636	ENSMUSG00000091804	4	94318600	94323162
Tek	ENSMUSG00000006386	4	94405980	94541667
4930579C15Rik	ENSMUSG00000028575	4	94573958	94595534
Mysm1	ENSMUSG00000062627	4	94608731	94645791
Jun	ENSMUSG00000052684	4	94715725	94718913
Fggy	ENSMUSG00000028573	4	95224198	95593630
Hook1	ENSMUSG00000028572	4	95633931	95692104
Cyp2j13	ENSMUSG00000028571	4	95694225	95744237
Gm12648	ENSMUSG00000085931	4	93756267	94092279
Gm12654	ENSMUSG00000081508	4	94062349	94062935
Gm12655	ENSMUSG00000087128	4	94127622	94143871
Gm12656	ENSMUSG00000083359	4	94163723	94164299
Gm12657	ENSMUSG00000063314	4	94260341	94267001
Gm12693	ENSMUSG00000083179	4	94602312	94602794
Gm12694	ENSMUSG00000086251	4	94645894	94695235
Gm12703	ENSMUSG00000052767	4	94696654	94715061
Gm12704	ENSMUSG00000081030	4	94705853	94706316
BC042782	ENSMUSG00000087366	4	94718225	94834009
4930551L18Rik	ENSMUSG00000085377	4	94755774	94758110
Gm12708	ENSMUSG00000084918	4	94860004	94876418
Gm830	ENSMUSG00000084939	4	95131415	95154085
Gm12707	ENSMUSG00000085835	4	95150647	95154092
RP23-356F8.3	ENSMUSG00000093492	4	95228522	95228850
9530080O11Rik	ENSMUSG00000044125	4	95626406	95634346
Hspe1-ps6	ENSMUSG00000083880	4	95739115	95739397
n-R5s189	ENSMUSG00000084624	4	94729341	94729454
SNORA2	ENSMUSG00000088677	4	94154574	94154674
U1	ENSMUSG00000065745	4	95190735	95190895
SNORA61	ENSMUSG00000077622	4	93764981	93765109
7SK	ENSMUSG00000088295	4	94100915	94101175
Mir872	ENSMUSG00000077921	4	94331848	94331928
Cyp2j12	ENSMUSG00000081225	4	95766009	95807843
Gm10564	ENSMUSG00000073686	4	154416155	154419531
Pex10	ENSMUSG00000029047	4	154441125	154446542
Rer1	ENSMUSG00000029048	4	154448219	154460491
Morn1	ENSMUSG00000029049	4	154460686	154519614
Ski	ENSMUSG00000029050	4	154528184	154596701
2610002J02Rik	ENSMUSG00000073684	4	154623911	154630793
Prkcz	ENSMUSG00000029053	4	154634238	154735470
Gabrd	ENSMUSG00000029054	4	154759089	154772221
2010015L04Rik	ENSMUSG00000042233	4	154783299	154822053
C030017K20Rik	ENSMUSG00000078490	4	154825679	154840639
Tmem52	ENSMUSG00000023153	4	154843223	154844966
Gnb1	ENSMUSG00000029064	4	154865470	154933378
A430005L14Rik	ENSMUSG00000047613	4	153331346	153336034
Dffb	ENSMUSG00000029027	4	153338558	153349235
BC046331	ENSMUSG00000039523	4	153349303	153382841
Lrrc47	ENSMUSG00000029028	4	153385840	153395622
Ccdc27	ENSMUSG00000039492	4	153400748	153416786
Trp73	ENSMUSG00000029026	4	153430358	153514317
Wdr8	ENSMUSG00000029029	4	153516481	153542372
Tprgl	ENSMUSG00000029030	4	153531594	153534775
Megf6	ENSMUSG00000057751	4	153544839	153649822
Arhgef16	ENSMUSG00000029032	4	153652595	153675785
Prdm16	ENSMUSG00000039410	4	153690234	154010982
Actrt2	ENSMUSG00000051276	4	154040537	154041976
Ttc34	ENSMUSG00000046637	4	154230309	154241234
Mmel1	ENSMUSG00000058183	4	154243694	154269637
2810405K02Rik	ENSMUSG00000029059	4	154269613	154273244
Tnfrsf14	ENSMUSG00000042333	4	154296319	154302672
Hes5	ENSMUSG00000048001	4	154335032	154336480
Pank4	ENSMUSG00000029056	4	154338232	154355047
Plch2	ENSMUSG00000029055	4	154357224	154430893
Gm13115	ENSMUSG00000085390	4	153281495	153282775
BC039966	ENSMUSG00000086272	4	153321742	153324612
1190007F08Rik	ENSMUSG00000078350	4	153394697	153400261
Gm13117	ENSMUSG00000080807	4	153417842	153418532
Gm13114	ENSMUSG00000082073	4	153422132	153422237
Gm13116	ENSMUSG00000087071	4	153467588	153472462
Gm13132	ENSMUSG00000081276	4	153594650	153595121
Gm13133	ENSMUSG00000086565	4	153924391	153931754
Gm13134	ENSMUSG00000084987	4	153975306	153978311
Gm13111	ENSMUSG00000085069	4	154011685	154018825
Gm13110	ENSMUSG00000086810	4	154019863	154029427
Gm13113	ENSMUSG00000087012	4	154211568	154213384
Gm13112	ENSMUSG00000087437	4	154238615	154246112
Gm20421	ENSMUSG00000092483	4	154334879	154335787
5830444B04Rik	ENSMUSG00000084803	4	154772872	154795813
Gm13171	ENSMUSG00000082429	4	154876425	154876815
SNORA17	ENSMUSG00000077519	4	153250493	153250624
SNORA48	ENSMUSG00000088774	4	153508139	153508282
Gabra2	ENSMUSG00000000560	5	71352296	71487088
Cox7b2	ENSMUSG00000049387	5	71834063	71939444
Gabra4	ENSMUSG00000029211	5	71960973	72049547
Gabrb1	ENSMUSG00000029212	5	72091171	72529628
Commd8	ENSMUSG00000029213	5	72548239	72559422
Corin	ENSMUSG00000005220	5	72691264	72895712
Nfxl1	ENSMUSG00000072889	5	72904540	72950923
Zar1	ENSMUSG00000063935	5	72968353	72972323
Gm5868	ENSMUSG00000060204	5	72972878	72978789
Cnga1	ENSMUSG00000067220	5	72994935	73033991
Nipal1	ENSMUSG00000067219	5	73039035	73062317
Txk	ENSMUSG00000054892	5	73087217	73144012
Tec	ENSMUSG00000029217	5	73146957	73259722
Slain2	ENSMUSG00000036087	5	73305543	73370068
Gm15617	ENSMUSG00000080736	5	72423957	72424727
Gm15616	ENSMUSG00000082705	5	72438444	72438818
Atp10d	ENSMUSG00000046808	5	72594568	72690014
RP23-193A2.2	ENSMUSG00000093400	5	72707593	72759287
Gm19560	ENSMUSG00000093644	5	72800683	72801196
AU023070	ENSMUSG00000093771	5	72887439	72888343
Gm9870	ENSMUSG00000052154	5	73305535	73306181
U6	ENSMUSG00000089195	5	72696604	72696701
U6	ENSMUSG00000065000	5	72809952	72810058
Gm10135	ENSMUSG00000063656	5	73357047	73365941
U6	ENSMUSG00000088268	5	73362418	73362503
Slc10a4	ENSMUSG00000029219	5	73398143	73405922
Fryl	ENSMUSG00000070733	5	73411561	73647857
Gm15847	ENSMUSG00000081849	5	73404738	73408615
Fryl	ENSMUSG00000090491	5	73585067	73647827
1700071G01Rik	ENSMUSG00000086376	5	73548253	73549119
Gm17207	ENSMUSG00000090561	5	73601348	73603873
Ociad1	ENSMUSG00000029152	5	73684033	73705316
Ociad2	ENSMUSG00000029153	5	73713438	73730186
Cwh43	ENSMUSG00000029154	5	73797315	73844674
Dcun1d4	ENSMUSG00000051674	5	73872241	73952033
Gm15653	ENSMUSG00000082039	5	73867683	73868592
Lrrc66	ENSMUSG00000067206	5	73997882	74023744
Sgcb	ENSMUSG00000029156	5	74023988	74038983
Spata18	ENSMUSG00000029155	5	74042619	74070723
Usp46	ENSMUSG00000054814	5	74394487	74464455
1700094C10Rik	ENSMUSG00000087250	5	74410241	74425705
1700112M01Rik	ENSMUSG00000086234	5	74428299	74436021
2700023E23Rik	ENSMUSG00000053656	5	74489085	74491430
Snora26	ENSMUSG00000093355	5	74489555	74489675
Rasl11b	ENSMUSG00000049907	5	74591321	74595503
Scfd2	ENSMUSG00000062110	5	74600841	74927772
Gm15981	ENSMUSG00000080700	5	74712591	74713054
Gm15982	ENSMUSG00000084132	5	74752591	74754440
Fip1l1	ENSMUSG00000029227	5	74931474	74994815
Lnx1	ENSMUSG00000029228	5	74988471	75098936
Nkx6-1	ENSMUSG00000035187	5	102087158	102094245
Cds1	ENSMUSG00000029330	5	102194149	102252877
Wdfy3	ENSMUSG00000043940	5	102261972	102498940
Arhgap24	ENSMUSG00000057315	5	102910410	103326955
Mapk10	ENSMUSG00000046709	5	103336967	103640353
Ptpn13	ENSMUSG00000034573	5	103854211	104027378
Slc10a6	ENSMUSG00000029321	5	104034730	104058422
Gm20548	ENSMUSG00000092354	5	102266435	102275429
Gm15844	ENSMUSG00000084126	5	104053490	104054065
7SK	ENSMUSG00000088474	5	104031606	104031898
1700016H13Rik	ENSMUSG00000029320	5	104077058	104085029
Aff1	ENSMUSG00000029313	5	104121393	104284341
Klhl8	ENSMUSG00000029312	5	104290992	104340278
U6	ENSMUSG00000064629	5	104327898	104328004
U1	ENSMUSG00000088121	5	104087256	104087426
Hsd17b13	ENSMUSG00000034528	5	104384459	104406429
Hsd17b11	ENSMUSG00000029311	5	104418781	104450938
Gm8200	ENSMUSG00000082527	5	104418389	104418610
Nudt9	ENSMUSG00000029310	5	104475325	104494398
AL714024.1	ENSMUSG00000093690	5	104477022	104477082
Ccdc62	ENSMUSG00000061882	5	124377427	124419904
Hip1r	ENSMUSG00000000915	5	124423637	124453220
Vps37b	ENSMUSG00000066278	5	124454650	124482269
Abcb9	ENSMUSG00000029408	5	124511539	124545807
Ogfod2	ENSMUSG00000023707	5	124562306	124565492
Arl6ip4	ENSMUSG00000029404	5	124566098	124568205
Pitpnm2	ENSMUSG00000029406	5	124568699	124699769
Mphosph9	ENSMUSG00000038126	5	124700968	124777981
2810006K23Rik	ENSMUSG00000047635	5	124778098	124791853
Cdk2ap1	ENSMUSG00000029394	5	124795426	124804680
Sbno1	ENSMUSG00000038095	5	124818711	124875923
Setd8	ENSMUSG00000049327	5	124889939	124912317
Rilpl2	ENSMUSG00000029401	5	124913274	124928375
Snrnp35	ENSMUSG00000029402	5	124933143	124941133
Rilpl1	ENSMUSG00000029392	5	124943091	124981400
Tmed2	ENSMUSG00000029390	5	124990704	125000515
Ddx55	ENSMUSG00000029389	5	125002873	125019669
Eif2b1	ENSMUSG00000029388	5	125020222	125029140
Gtf2h3	ENSMUSG00000029387	5	125029149	125047689
Tctn2	ENSMUSG00000029386	5	125048758	125077658
Atp6v0a2	ENSMUSG00000038023	5	125079673	125204824
Dnahc10	ENSMUSG00000038011	5	125205455	125314678
Ccdc92	ENSMUSG00000037979	5	125314788	125342794
Zfp664	ENSMUSG00000079215	5	125343061	125383063
Zfp664	ENSMUSG00000051911	5	125343113	125381781
Fam101a	ENSMUSG00000037962	5	125483817	125492917
Ncor2	ENSMUSG00000029478	5	125497523	125659589
Scarb1	ENSMUSG00000037936	5	125757457	125821464
Ubc	ENSMUSG00000008348	5	125866335	125870572
Gm10382	ENSMUSG00000072612	5	125869692	125870924
Dhx37	ENSMUSG00000029480	5	125894230	125914491
Bri3bp	ENSMUSG00000037905	5	125921938	125941242
Aacs	ENSMUSG00000029482	5	125956184	125997782
Tmem132b	ENSMUSG00000070498	5	126102858	126179143
Tmem132b	ENSMUSG00000029483	5	126259004	126268438
Gm4868	ENSMUSG00000091970	5	126328322	126329110
Gm16001	ENSMUSG00000085433	5	124561118	124562250
Gm16338	ENSMUSG00000089842	5	124644916	124650355
4930568K20Rik	ENSMUSG00000090220	5	124679734	124687146
Gm15621	ENSMUSG00000082402	5	124922436	124922799
7SK	ENSMUSG00000087784	5	124707772	124708035
AC127313.1	ENSMUSG00000092736	5	125009560	125009808
AC132118.1	ENSMUSG00000093068	5	125662051	125662129
AC164649.1	ENSMUSG00000092806	5	125267381	125267481
U6	ENSMUSG00000088650	5	125197448	125197545
U6	ENSMUSG00000070220	5	126869918	126870024
U6	ENSMUSG00000084551	5	126994245	126994351
Gm17725	ENSMUSG00000091555	6	51329709	51342776
Gm15055	ENSMUSG00000085412	6	52052948	52062531
Gm8078	ENSMUSG00000081979	6	52068241	52068890
Gm15052	ENSMUSG00000082781	6	52081777	52082045
Gm15051	ENSMUSG00000087658	6	52106901	52112118
5730446D14Rik	ENSMUSG00000056445	6	52115673	52119563
Gm15050	ENSMUSG00000087626	6	52122880	52124058
2700086A05Rik	ENSMUSG00000085696	6	52125216	52165075
9930038K12Rik	ENSMUSG00000092475	6	52178246	52180531
9930038K12Rik	ENSMUSG00000056583	6	52180079	52180529
Hoxa11as	ENSMUSG00000086427	6	52194392	52199798
Gm15053	ENSMUSG00000055408	6	52212769	52217597
5730457N03Rik	ENSMUSG00000086126	6	52258383	52264826
Gm8129	ENSMUSG00000059159	6	52296724	52296939
Gm15054	ENSMUSG00000084282	6	52307538	52307818
Gm15572	ENSMUSG00000081872	6	52793103	52793695
Gm15573	ENSMUSG00000080759	6	52995878	52996417
Hnrnpa2b1	ENSMUSG00000004980	6	51410433	51419893
Cbx3	ENSMUSG00000029836	6	51420359	51433703
Snx10	ENSMUSG00000038301	6	51473900	51540678
Skap2	ENSMUSG00000059182	6	51809165	51962548
Hoxa1	ENSMUSG00000029844	6	52105366	52108316
Hoxa2	ENSMUSG00000014704	6	52112350	52115412
RP23-103L13.8	ENSMUSG00000093412	6	52113358	52163338
Hoxa3	ENSMUSG00000079560	6	52118509	52163335
5730596B20Rik	ENSMUSG00000056468	6	52127497	52130850
Hoxa4	ENSMUSG00000000942	6	52139670	52141752
Hoxa3	ENSMUSG00000059723	6	52149150	52163335
Hoxa5	ENSMUSG00000038253	6	52151753	52154586
Hoxa6	ENSMUSG00000043219	6	52155430	52161355
Hoxa7	ENSMUSG00000038236	6	52164490	52171853
Hoxa9	ENSMUSG00000038227	6	52173099	52181088
Hoxa10	ENSMUSG00000000938	6	52181196	52190853
Hoxa11	ENSMUSG00000038210	6	52192107	52196213
Hoxa13	ENSMUSG00000038203	6	52207693	52210874
Evx1	ENSMUSG00000005503	6	52263492	52268372
Hibadh	ENSMUSG00000029776	6	52496222	52590383
Nfe2l3	ENSMUSG00000029832	6	51382669	51408767
Tax1bp1	ENSMUSG00000004535	6	52663723	52716774
Jazf1	ENSMUSG00000063568	6	52718791	53018625
9430076C15Rik	ENSMUSG00000090982	6	53237289	53397716
SCARNA20	ENSMUSG00000089209	6	52960388	52960526
SNORA32	ENSMUSG00000064792	6	52589228	52589349
AC153877.1	ENSMUSG00000092936	6	51571631	51571707
Mir196b	ENSMUSG00000065443	6	52180080	52180164
Creb5	ENSMUSG00000053007	6	53523378	53646001
U1	ENSMUSG00000065216	6	53383968	53384131
Tril	ENSMUSG00000043496	6	53765465	53770819
Gm16499	ENSMUSG00000078169	6	53769969	53770034
Cpvl	ENSMUSG00000052955	6	53823373	53928656
SNORA17	ENSMUSG00000077773	6	53822011	53822142
Chn2	ENSMUSG00000004633	6	53989548	54251804
9530036M11Rik	ENSMUSG00000087670	6	54096881	54100931
Gm15526	ENSMUSG00000080205	6	54127474	54127677
Gm15527	ENSMUSG00000086946	6	54195736	54229070
9130019P16Rik	ENSMUSG00000073067	6	54219675	54380215
Prr15	ENSMUSG00000045725	6	54277006	54280194
Wipf3	ENSMUSG00000086040	6	54379597	54453762
Scrn1	ENSMUSG00000019124	6	54455884	54516483
Fkbp14	ENSMUSG00000038074	6	54527598	54547338
Gm15863	ENSMUSG00000085341	6	54585183	54593344
2410066E13Rik	ENSMUSG00000038065	6	54631734	54653845
Znrf2	ENSMUSG00000058446	6	54766910	54843494
Nod1	ENSMUSG00000038058	6	54873936	54922606
Ggct	ENSMUSG00000002797	6	54932574	54942944
Plekha8	ENSMUSG00000005225	6	54545105	54595833
SNORA17	ENSMUSG00000077501	6	54924645	54924773
Gm16723	ENSMUSG00000085703	6	87858837	87864453
Gm16628	ENSMUSG00000085291	6	88666418	88674495
Gm16896	ENSMUSG00000085988	6	89254624	89277615
E230015B07Rik	ENSMUSG00000071332	6	87622376	87631018
1810020O05Rik	ENSMUSG00000089997	6	87625587	87640841
Rps19-ps9	ENSMUSG00000068689	6	87898463	87898874
1700031F10Rik	ENSMUSG00000047046	6	88172596	88175672
Gm15612	ENSMUSG00000085828	6	88792848	88797268
Gm6507	ENSMUSG00000090013	6	89134666	89136019
Prokr1	ENSMUSG00000049409	6	87528587	87540695
Aplf	ENSMUSG00000030051	6	87578423	87622162
Ccdc48	ENSMUSG00000068263	6	87680863	87705906
Gm5879	ENSMUSG00000068262	6	87714930	87716225
Gp9	ENSMUSG00000030054	6	87728130	87729756
Rab43	ENSMUSG00000030055	6	87738847	87762158
Isy1	ENSMUSG00000030056	6	87768441	87788753
Cnbp	ENSMUSG00000030057	6	87792609	87801100
Copg	ENSMUSG00000030058	6	87837808	87863589
8430410A17Rik	ENSMUSG00000030060	6	87863929	87886623
H1fx	ENSMUSG00000044927	6	87930416	87931476
Gm5577	ENSMUSG00000084950	6	87930877	87955465
Rab7	ENSMUSG00000079477	6	87949100	87995264
Rpn1	ENSMUSG00000030062	6	88034467	88055298
Gata2	ENSMUSG00000015053	6	88143885	88157024
Dnajb8	ENSMUSG00000048206	6	88172262	88173250
Eefsec	ENSMUSG00000033216	6	88207328	88396533
Ruvbl1	ENSMUSG00000030079	6	88415403	88447566
Sec61a1	ENSMUSG00000030082	6	88453595	88468899
Kbtbd12	ENSMUSG00000033182	6	88497716	88577439
Mgll	ENSMUSG00000033174	6	88674406	88778354
Abtb1	ENSMUSG00000030083	6	88785909	88791929
Podxl2	ENSMUSG00000033152	6	88792552	88825038
Mcm2	ENSMUSG00000002870	6	88833469	88848774
Tpra1	ENSMUSG00000002871	6	88852245	88862232
4933427D06Rik	ENSMUSG00000055403	6	89046104	89060031
Gm1965	ENSMUSG00000090254	6	89090999	89097379
Gm1965	ENSMUSG00000072917	6	89090999	89097347
Gm839	ENSMUSG00000060416	6	89161159	89166231
Plxna1	ENSMUSG00000030084	6	89266310	89312607
Chchd6	ENSMUSG00000030086	6	89333140	89545646
AC158626.1	ENSMUSG00000077852	6	87677235	87677327
5S_rRNA	ENSMUSG00000087799	6	89199462	89199596
7SK	ENSMUSG00000084582	6	88355971	88356295
Txnrd3	ENSMUSG00000000811	6	89593982	89625523
Vmn1r-ps25	ENSMUSG00000068235	6	89648711	89649557
Vmn1r40	ENSMUSG00000059546	6	89664197	89665129
Vmn1r41	ENSMUSG00000068230	6	89696473	89697408
Vmn1r-ps26	ENSMUSG00000092311	6	89739443	89740282
Vmn1r-ps27	ENSMUSG00000092237	6	89755002	89755986
Vmn1r-ps28	ENSMUSG00000092228	6	89857671	89858612
Vmn1r42	ENSMUSG00000068232	6	89794512	89795609
Vmn1r43	ENSMUSG00000068231	6	89819455	89820523
Vmn1r44	ENSMUSG00000068234	6	89843171	89844278
Vmn1r45	ENSMUSG00000044248	6	89881643	89890501
Vmn1r46	ENSMUSG00000061653	6	89926165	89927094
Vmn1r-ps29	ENSMUSG00000092303	6	89947606	89954583
Vmn1r47	ENSMUSG00000060724	6	89971882	89972814
Vmn1r48	ENSMUSG00000057592	6	89985927	89986835
Vmn1r-ps31	ENSMUSG00000092450	6	90006403	90006640
Gm20534	ENSMUSG00000092588	6	90006620	90006791
Vmn1r49	ENSMUSG00000060151	6	90022080	90023012
Vmn1r-ps32	ENSMUSG00000061843	6	90103041	90103996
Vmn1r50	ENSMUSG00000058595	6	90057269	90058201
Vmn1r51	ENSMUSG00000062818	6	90072637	90080984
Vmn1r52	ENSMUSG00000060816	6	90128710	90129639
V1ra8	ENSMUSG00000062546	6	90152787	90153676
Vmn1r53	ENSMUSG00000057697	6	90173311	90174432
Gm20426	ENSMUSG00000092247	6	90181722	90182782
Gm4287	ENSMUSG00000092552	6	90185683	90186267
Vmn1r-ps34	ENSMUSG00000068228	6	90192266	90193237
Vmn1r54	ENSMUSG00000047203	6	90219100	90220047
BC048671	ENSMUSG00000049694	6	90251213	90255443
Chst13	ENSMUSG00000056643	6	90258345	90275179
Uroc1	ENSMUSG00000034456	6	90283283	90314545
Zxdc	ENSMUSG00000034430	6	90319486	90353484
Ccdc37	ENSMUSG00000048794	6	90353730	90378791
Klf15	ENSMUSG00000030087	6	90412570	90425232
Aldh1l1	ENSMUSG00000030088	6	90436421	90550197
Slc41a3	ENSMUSG00000030089	6	90554719	90596406
Iqsec1	ENSMUSG00000034312	6	90609592	90760117
Gm15756	ENSMUSG00000089781	6	90546679	90549942
Rpl21-ps12	ENSMUSG00000057370	6	90794972	90795454
Nup210	ENSMUSG00000030091	6	90963062	91066823
Ppp1r2-ps2	ENSMUSG00000072894	6	90855693	90856501
AC121954.1	ENSMUSG00000093052	6	90631364	90631512
SNORA17	ENSMUSG00000088379	6	90807531	90807626
Fbln2	ENSMUSG00000064080	6	91162449	91222534
Gm14573	ENSMUSG00000085624	6	91108707	91109250
Hdac11	ENSMUSG00000034245	6	91106659	91124686
Wnt7a	ENSMUSG00000030093	6	91313975	91361357
4930471M09Rik	ENSMUSG00000085727	6	91380454	91390848
Chchd4	ENSMUSG00000034203	6	91414270	91423417
Tmem43	ENSMUSG00000030095	6	91423697	91438453
Xpc	ENSMUSG00000030094	6	91439299	91465878
Lsm3	ENSMUSG00000034192	6	91465951	91469829
Lsm3	ENSMUSG00000090846	6	91466029	91472614
Slc6a6	ENSMUSG00000030096	6	91634061	91709057
Grip2	ENSMUSG00000030098	6	91711503	91777244
AC162914.1	ENSMUSG00000093712	6	91782499	91782569
Gm17574	ENSMUSG00000091384	7	19967569	19978067
Gm17375	ENSMUSG00000092002	7	20182642	20187643
Rsph6a	ENSMUSG00000040866	7	19640039	19659796
Dmwd	ENSMUSG00000030410	7	19661598	19668125
Dmpk	ENSMUSG00000030409	7	19669198	19679170
Six5	ENSMUSG00000040841	7	19679943	19683898
Gm4969	ENSMUSG00000085601	7	19686900	19703717
Fbxo46	ENSMUSG00000050428	7	19705208	19723610
Qpctl	ENSMUSG00000030407	7	19725566	19734545
Snrpd2	ENSMUSG00000040824	7	19735071	19738084
Gipr	ENSMUSG00000030406	7	19742474	19751476
Eml2	ENSMUSG00000040811	7	19761770	19791831
Gpr4	ENSMUSG00000044317	7	19797887	19809525
Opa3	ENSMUSG00000052214	7	19813683	19841892
Vasp	ENSMUSG00000030403	7	19842278	19857166
Ppm1n	ENSMUSG00000030402	7	19862156	19865398
Rtn2	ENSMUSG00000030401	7	19868011	19881513
Fosb	ENSMUSG00000003545	7	19888070	19895394
Ercc1	ENSMUSG00000003549	7	19930127	19941873
Cd3eap	ENSMUSG00000047649	7	19942198	19944832
Ppp1r13l	ENSMUSG00000040734	7	19945098	19963882
Ercc2	ENSMUSG00000030400	7	19967359	19981043
Klc3	ENSMUSG00000040714	7	19979786	19989453
Ckm	ENSMUSG00000030399	7	19996443	20006932
Gm17405	ENSMUSG00000091658	7	19996973	19997621
A930016O22Rik	ENSMUSG00000040705	7	20004161	20006766
Mark4	ENSMUSG00000030397	7	20010816	20043843
Exoc3l2	ENSMUSG00000011263	7	20074405	20082109
Bloc1s3	ENSMUSG00000057667	7	20091163	20093680
Trappc6a	ENSMUSG00000002043	7	20094019	20101494
Nkpd1	ENSMUSG00000060621	7	20104080	20110399
Ppp1r37	ENSMUSG00000051403	7	20116316	20147747
Gemin7	ENSMUSG00000044709	7	20150295	20159172
Gm17370	ENSMUSG00000092034	7	19547764	19550522
Gm17589	ENSMUSG00000090995	7	19883609	19886119
Gm6065	ENSMUSG00000063830	7	18377923	18378414
Gm16266	ENSMUSG00000086533	7	19578902	19586571
1700058P15Rik	ENSMUSG00000089636	7	19843841	19845088
Ceacam5	ENSMUSG00000008789	7	18298601	18346475
Ceacam14	ENSMUSG00000023185	7	18397982	18401012
Gm5155	ENSMUSG00000078793	7	18457116	18504373
Ceacam11	ENSMUSG00000030368	7	18557473	18563905
Ceacam13	ENSMUSG00000057195	7	18595238	18604570
Ceacam12	ENSMUSG00000030366	7	18651278	18663335
Igfl3	ENSMUSG00000066756	7	18761843	18767211
Mill1	ENSMUSG00000054005	7	18830696	18851441
Psg18	ENSMUSG00000003505	7	18931157	18940356
Psg28	ENSMUSG00000030373	7	19007887	19017404
Psg26	ENSMUSG00000070799	7	19059932	19069498
Psg25	ENSMUSG00000070798	7	19105053	19117576
Psg27	ENSMUSG00000070797	7	19141864	19152654
Psg23	ENSMUSG00000074359	7	19191692	19201850
Psg21	ENSMUSG00000070796	7	19232003	19242074
Psg20	ENSMUSG00000063305	7	19259456	19271534
Psg22	ENSMUSG00000044903	7	19303439	19312597
Psg19	ENSMUSG00000004542	7	19374474	19383859
Psg17	ENSMUSG00000004540	7	19399286	19406956
Mill2	ENSMUSG00000040987	7	19425315	19444003
Pglyrp1	ENSMUSG00000030413	7	19470039	19475787
Ccdc61	ENSMUSG00000074358	7	19476232	19495764
Nova2	ENSMUSG00000030411	7	19510698	19551031
Nanos2	ENSMUSG00000051965	7	19572873	19574311
Gm10676	ENSMUSG00000074355	7	19574903	19578123
Mypop	ENSMUSG00000048481	7	19576594	19587115
Irf2bp1	ENSMUSG00000044030	7	19589414	19592110
Foxa3	ENSMUSG00000040891	7	19598631	19608887
Sympk	ENSMUSG00000023118	7	19609726	19639967
Tomm40	ENSMUSG00000002984	7	20286662	20300787
Zfp296	ENSMUSG00000011267	7	20162636	20166005
Clasrp	ENSMUSG00000061028	7	20166393	20189817
Relb	ENSMUSG00000002983	7	20191566	20214787
Clptm1	ENSMUSG00000002981	7	20216930	20250379
Apoc2	ENSMUSG00000002992	7	20256928	20266772
Apoc4	ENSMUSG00000074336	7	20263443	20266765
Apoc1	ENSMUSG00000040564	7	20274833	20278007
Apoe	ENSMUSG00000002985	7	20281458	20284515
AC151983.1	ENSMUSG00000076355	7	18771038	18771138
AC134475.1	ENSMUSG00000093207	7	18602601	18602701
U1	ENSMUSG00000064580	7	19827479	19827638
U1	ENSMUSG00000065388	7	20046146	20046284
Mir330	ENSMUSG00000065543	7	19766814	19766911
U6	ENSMUSG00000065313	7	19134434	19134540
U6	ENSMUSG00000065368	7	19330452	19330558
Mir343	ENSMUSG00000076315	7	19971992	19972066
AC151412.1	ENSMUSG00000076332	7	19003188	19003282
Mir3100	ENSMUSG00000092659	7	19672177	19672241
U7	ENSMUSG00000089483	7	18846813	18846875
Gm20512	ENSMUSG00000092381	7	20300365	20307080
Pvrl2	ENSMUSG00000062300	7	20301993	20334922
1500012K07Rik	ENSMUSG00000086403	7	82453588	82476305
Sv2b	ENSMUSG00000053025	7	82259783	82454148
Akap13	ENSMUSG00000066406	7	82600420	82899495
Klhl25	ENSMUSG00000055652	7	82993224	83019016
Gm7580	ENSMUSG00000085161	7	81537584	81556119
St8sia2	ENSMUSG00000025789	7	81084005	81158568
Slco3a1	ENSMUSG00000025790	7	81420305	81699666
AC158749.1	ENSMUSG00000076961	7	82902145	82902254
snoU109	ENSMUSG00000089573	7	81134982	81135120
U6	ENSMUSG00000087896	7	82813759	82813842
7SK	ENSMUSG00000088683	7	82419975	82420297
7SK	ENSMUSG00000089522	7	82107233	82107583
Tmem188	ENSMUSG00000036810	8	90642668	90659009
Heatr3	ENSMUSG00000031657	8	90661754	90695926
9430002A10Rik	ENSMUSG00000062704	8	90698459	90698927
Papd5	ENSMUSG00000036779	8	90723112	90783621
Adcy7	ENSMUSG00000031659	8	90796302	90853861
Brd7	ENSMUSG00000031660	8	90854938	90886093
Nkd1	ENSMUSG00000031661	8	91045243	91118786
Snx20	ENSMUSG00000031662	8	91150727	91160027
Nod2	ENSMUSG00000055994	8	91171214	91212373
Cyld	ENSMUSG00000036712	8	91220927	91275844
Rps6-ps2	ENSMUSG00000056772	8	91330290	91331039
Sall1	ENSMUSG00000031665	8	91551147	91568061
Gm5356	ENSMUSG00000069962	8	91710842	91711459
Gm2716	ENSMUSG00000086208	8	90568797	90642506
Gm9988	ENSMUSG00000055968	8	90661978	90662416
U6	ENSMUSG00000064758	8	92113334	92113440
SNORA17	ENSMUSG00000088883	8	92191072	92191203
Tox3	ENSMUSG00000043668	8	92770939	92872242
Chd9	ENSMUSG00000056608	8	93352734	93578407
Gm6658	ENSMUSG00000074171	8	93431838	93432314
Rbl2	ENSMUSG00000031666	8	93593956	93647743
Aktip	ENSMUSG00000031667	8	93635940	93658364
SNORA17	ENSMUSG00000089179	8	93585164	93585295
Rpgrip1l	ENSMUSG00000033282	8	93740929	93837161
Fto	ENSMUSG00000055932	8	93837431	94192338
Irx3	ENSMUSG00000031734	8	94322424	94325966
4933436C20Rik	ENSMUSG00000031736	8	94849937	94880019
Irx5	ENSMUSG00000031737	8	94881695	94885353
Gm3235	ENSMUSG00000090778	8	94145347	94153628
D230002A01Rik	ENSMUSG00000046413	8	94324314	94331438
U6	ENSMUSG00000065636	8	94563816	94563919
7SK	ENSMUSG00000089148	8	93708818	93709082
Katnb1	ENSMUSG00000031787	8	97605101	97623774
Kifc3	ENSMUSG00000031788	8	97623732	97666440
Cngb1	ENSMUSG00000031789	8	97762945	97808081
BC016201	ENSMUSG00000058253	8	97814493	97830485
Tepp	ENSMUSG00000090206	8	97834466	97850223
Zfp319	ENSMUSG00000074140	8	97846914	97849163
Zfp319	ENSMUSG00000046556	8	97850037	97855850
AA960436	ENSMUSG00000031792	8	97856192	97871407
Mmp15	ENSMUSG00000031790	8	97876168	97898193
Gtl3	ENSMUSG00000031796	8	97944152	97958769
Csnk2a2	ENSMUSG00000046707	8	97969996	98012727
Ccdc113	ENSMUSG00000036598	8	98058000	98082788
Prss54	ENSMUSG00000048400	8	98083033	98099355
Gins3	ENSMUSG00000031669	8	98157459	98168959
Ndrg4	ENSMUSG00000036564	8	98200880	98239019
Setd6	ENSMUSG00000031671	8	98239815	98242910
Cnot1	ENSMUSG00000036550	8	98243351	98331366
Gm10094	ENSMUSG00000061104	8	98349254	98350033
Slc38a7	ENSMUSG00000036534	8	98359820	98377439
Got2	ENSMUSG00000031672	8	98388034	98412447
1700047G07Rik	ENSMUSG00000053206	8	99036240	99037431
Gm5912	ENSMUSG00000081436	8	98101371	98102808
4930513N10Rik	ENSMUSG00000074136	8	98330730	98345628
SNORA46	ENSMUSG00000065089	8	98269960	98270095
SNORA76	ENSMUSG00000065211	8	98280850	98280984
AC128668.1	ENSMUSG00000077938	8	99180029	99180119
SNORA17	ENSMUSG00000077272	8	98842387	98842518
Mir1186b	ENSMUSG00000093084	8	98487444	98487507
Cdh8	ENSMUSG00000036510	8	101548371	101940371
A330008L17Rik	ENSMUSG00000052479	8	101940542	102257338
Gm3662	ENSMUSG00000090316	8	103142530	103144395
Gm15679	ENSMUSG00000089819	8	101535786	101556640
Gm15681	ENSMUSG00000086842	8	101669286	101671989
Gm15680	ENSMUSG00000090116	8	101921113	102030670
Gm8688	ENSMUSG00000083586	8	102187919	102189307
Gm15210	ENSMUSG00000071041	8	102554393	102556047
Gm5742	ENSMUSG00000081383	8	102584016	102584520
U6	ENSMUSG00000065819	8	101596363	101596469
Nudt7	ENSMUSG00000031767	8	116657457	116676212
Vat1l	ENSMUSG00000046844	8	116729512	116897971
Clec3a	ENSMUSG00000008874	8	116941986	116949746
Wwox	ENSMUSG00000004637	8	116963555	117876608
Maf	ENSMUSG00000055435	8	118206842	118231694
4933408N05Rik	ENSMUSG00000084848	8	116865060	116875379
Gm16116	ENSMUSG00000090217	8	117115203	117118800
Gm16117	ENSMUSG00000089723	8	117163446	117166014
Gm16118	ENSMUSG00000089797	8	117222339	117231906
Gm15655	ENSMUSG00000086717	8	118228978	118231133
U6	ENSMUSG00000065090	8	118115070	118115173
5S_rRNA	ENSMUSG00000088428	8	117576714	117576813
Gm16983	ENSMUSG00000085964	8	129090870	129114888
4933403G14Rik	ENSMUSG00000050930	8	128193718	128197265
Ntpcr	ENSMUSG00000031851	8	128253863	128272135
Pcnxl2	ENSMUSG00000060212	8	128275409	128422193
BC021891	ENSMUSG00000031853	8	128434350	128471339
Kcnk1	ENSMUSG00000033998	8	128519002	128554583
Slc35f3	ENSMUSG00000057060	8	128822458	128919382
1810063B05Rik	ENSMUSG00000051671	8	128946401	128949334
Gm17296	ENSMUSG00000090290	8	128950552	128998965
Irf2bp2	ENSMUSG00000051495	8	129112196	129117336
Tomm20	ENSMUSG00000058779	8	129458043	129469723
Rbm34	ENSMUSG00000033931	8	129471075	129494979
Pard3	ENSMUSG00000025812	8	129587793	130136186
Gm6091	ENSMUSG00000074026	8	129000148	129000312
Gm6921	ENSMUSG00000090074	8	130085335	130085769
SNORA14	ENSMUSG00000065637	8	129468747	129468880
AC118255.1	ENSMUSG00000092968	8	129027268	129027338
5S_rRNA	ENSMUSG00000088580	8	130121606	130121723
AC115706.1	ENSMUSG00000093196	8	129501027	129501149
U1	ENSMUSG00000088710	8	129570812	129570982
Gm17350	ENSMUSG00000091977	8	130870807	130870971
Nrp1	ENSMUSG00000025810	8	130882973	131029362
Mir1903	ENSMUSG00000084523	8	130883141	130883220
Itgb1	ENSMUSG00000025809	8	131209554	131257100
U6	ENSMUSG00000075864	8	131174897	131175003
1700008F21Rik	ENSMUSG00000056018	8	131591034	131707632
Gm10999	ENSMUSG00000078840	8	131652997	131655561
Ccdc7	ENSMUSG00000025808	8	131503919	131589417
SNORA17	ENSMUSG00000077538	8	131541790	131541921
SNORA17	ENSMUSG00000087870	8	131295070	131295196
SNORA17	ENSMUSG00000077771	8	131637195	131637326
Gm10722	ENSMUSG00000091028	9	3000922	3002330
Gm11168	ENSMUSG00000090650	9	3004457	3005194
Gm10721	ENSMUSG00000074565	9	3013170	3014344
Gm10720	ENSMUSG00000074564	9	3015654	3017210
Gm10719	ENSMUSG00000074563	9	3017408	3019022
Gm11167	ENSMUSG00000079719	9	3020155	3021593
Gm10718	ENSMUSG00000074562	9	3023547	3025218
Gm10717	ENSMUSG00000074561	9	3025417	3026387
Gm10716	ENSMUSG00000091599	9	3030337	3031071
Gm10106	ENSMUSG00000061971	9	3032085	3032822
Gm17535	ENSMUSG00000091057	9	3034599	3035805
Gm10715	ENSMUSG00000074558	9	3037111	3038316
4930433N12Rik	ENSMUSG00000042360	9	3133847	3199782
Alkbh8	ENSMUSG00000025899	9	3335478	3387050
Cwf19l2	ENSMUSG00000025898	9	3404085	3479236
Gucy1a2	ENSMUSG00000041624	9	3532354	3897342
Aasdhppt	ENSMUSG00000025894	9	4294793	4309494
Kbtbd3	ENSMUSG00000025893	9	4309743	4331721
8430410K20Rik	ENSMUSG00000041124	9	4376612	4386861
Gria4	ENSMUSG00000025892	9	4417899	4796234
Gm16869	ENSMUSG00000087580	9	3000282	3038313
U6	ENSMUSG00000077248	9	3395439	3395542
CT030685.1	ENSMUSG00000092896	9	4455940	4456020
AC115802.1	ENSMUSG00000080511	9	4271130	4271237
SNORA24	ENSMUSG00000064956	9	3352657	3352786
CT030685.2	ENSMUSG00000092959	9	4371269	4371335
Casp1	ENSMUSG00000025888	9	5298517	5307265
Casp4	ENSMUSG00000033538	9	5308828	5336783
Casp12	ENSMUSG00000025887	9	5345430	5373032
SNORA16	ENSMUSG00000084690	9	5111399	5111533
Pdgfd	ENSMUSG00000032006	9	6168612	6378843
Ddi1	ENSMUSG00000047619	9	6265028	6266547
Dync2h1	ENSMUSG00000047193	9	6928503	7184446
U6	ENSMUSG00000065382	9	6706342	6706446
Dcun1d5	ENSMUSG00000032002	9	7184566	7207031
Mmp13	ENSMUSG00000050578	9	7272514	7283333
Mmp12	ENSMUSG00000049723	9	7344381	7369499
Mmp1b	ENSMUSG00000041620	9	7368239	7388047
Mmp3	ENSMUSG00000043613	9	7445822	7455972
Mmp1a	ENSMUSG00000043089	9	7464141	7476869
Mmp10	ENSMUSG00000047562	9	7502352	7510238
Gm3756	ENSMUSG00000091639	9	31744044	31744340
Gm10698	ENSMUSG00000079884	9	33535831	33536436
Barx2	ENSMUSG00000032033	9	31653682	31721047
Arhgap32	ENSMUSG00000041444	9	31923721	32076031
Kcnj5	ENSMUSG00000032034	9	32122368	32151822
Kcnj1	ENSMUSG00000041248	9	32180003	32206777
Fli1	ENSMUSG00000016087	9	32229793	32348974
Ets1	ENSMUSG00000032035	9	32443806	32565405
U6	ENSMUSG00000064492	9	32254407	32254513
AC160635.1	ENSMUSG00000093088	9	31874756	31874881
SNORA17	ENSMUSG00000088905	9	33725077	33725207
A130066N16Rik	ENSMUSG00000053889	9	34725818	34737094
4930581F22Rik	ENSMUSG00000070315	9	34924313	34938507
Kirrel3	ENSMUSG00000032036	9	34293711	34844301
St3gal4	ENSMUSG00000032038	9	34854164	34924395
Dcps	ENSMUSG00000032040	9	34931993	34983646
Tirap	ENSMUSG00000032041	9	34992136	35007876
Srpr	ENSMUSG00000032042	9	35007760	35055558
Foxred1	ENSMUSG00000039048	9	35011791	35018640
Fam118b	ENSMUSG00000050471	9	35024550	35075390
Rpusd4	ENSMUSG00000032044	9	35075450	35085316
Gm5614	ENSMUSG00000066771	9	35089103	35089420
Cdon	ENSMUSG00000038119	9	35228713	35315236
Gm17346	ENSMUSG00000091603	9	34396111	34396889
U1	ENSMUSG00000065934	9	35282470	35282631
5S_rRNA	ENSMUSG00000088605	9	35311173	35311280
5S_rRNA	ENSMUSG00000089465	9	34767604	34767733
SNORA48	ENSMUSG00000088056	9	34952221	34952364
Ddx25	ENSMUSG00000032101	9	35349433	35366055
Gm6762	ENSMUSG00000086984	9	35381221	35382248
Gm10105	ENSMUSG00000061932	9	35396663	35396935
Pus3	ENSMUSG00000032103	9	35366180	35374768
Hyls1	ENSMUSG00000050555	9	35368405	35377688
Pate2	ENSMUSG00000074452	9	35377869	35497903
Pate4	ENSMUSG00000032099	9	35414678	35419520
Gm17365	ENSMUSG00000090858	9	35453647	35455704
Gm17252	ENSMUSG00000091215	9	35492664	35494956
Gm17677	ENSMUSG00000091174	9	35548634	35549837
Gm17727	ENSMUSG00000090738	9	35584198	35585470
D730048I06Rik	ENSMUSG00000032108	9	35585618	35597697
9230110F15Rik	ENSMUSG00000047980	9	35645914	35651735
Gm20444	ENSMUSG00000092258	9	43915384	43917043
Gm10080	ENSMUSG00000060467	9	44182824	44183278
C030014I23Rik	ENSMUSG00000060380	9	44286007	44290263
Grik4	ENSMUSG00000032017	9	42326218	42752576
Arhgef12	ENSMUSG00000059495	9	42771925	42913801
Tmem136	ENSMUSG00000048503	9	42916736	42924653
Pou2f3	ENSMUSG00000032015	9	42930711	43018452
Oaf	ENSMUSG00000032014	9	43029361	43047899
Trim29	ENSMUSG00000032013	9	43118846	43144208
Pvrl1	ENSMUSG00000032012	9	43552659	43615537
Thy1	ENSMUSG00000032011	9	43851467	43856662
Rnf26	ENSMUSG00000053128	9	43874410	43921600
Usp2	ENSMUSG00000032010	9	43875104	43903710
Mfrp	ENSMUSG00000034739	9	43909821	43917270
C1qtnf5	ENSMUSG00000079592	9	43915328	43917270
Mcam	ENSMUSG00000032135	9	43942552	43950810
Cbl	ENSMUSG00000034342	9	43957345	44042129
Ccdc153	ENSMUSG00000070306	9	44048760	44055389
Pdzd3	ENSMUSG00000032105	9	44055395	44059547
Nlrx1	ENSMUSG00000032109	9	44060796	44076682
Abcg4	ENSMUSG00000032131	9	44081271	44096698
Hinfp	ENSMUSG00000032119	9	44103756	44113754
C2cd2l	ENSMUSG00000032120	9	44117320	44128365
Dpagt1	ENSMUSG00000032123	9	44134928	44141683
H2afx	ENSMUSG00000049932	9	44142798	44144154
Hmbs	ENSMUSG00000032126	9	44144433	44152311
Vps11	ENSMUSG00000032127	9	44156189	44169753
Hyou1	ENSMUSG00000032115	9	44187573	44200452
Slc37a4	ENSMUSG00000032114	9	44205182	44211046
Trappc4	ENSMUSG00000032112	9	44211844	44215631
Rps25	ENSMUSG00000009927	9	44215797	44218488
Ccdc84	ENSMUSG00000043923	9	44218249	44226090
Foxr1	ENSMUSG00000074397	9	44241438	44248951
Upk2	ENSMUSG00000041523	9	44260799	44262850
Gm9830	ENSMUSG00000048648	9	44272240	44273615
Bcl9l	ENSMUSG00000063382	9	44307219	44318471
Cxcr5	ENSMUSG00000047880	9	44319871	44334504
Ddx6	ENSMUSG00000032097	9	44412975	44448814
Treh	ENSMUSG00000032098	9	44481316	44494388
Ift46	ENSMUSG00000002031	9	44575991	44600797
Gm3906	ENSMUSG00000092003	9	43921006	43930030
Gm10687	ENSMUSG00000074408	9	43931851	43942568
Tmem25	ENSMUSG00000002032	9	44601858	44607390
Ttc36	ENSMUSG00000039438	9	44607483	44611034
Mll1	ENSMUSG00000002028	9	44611438	44689379
Arcn1	ENSMUSG00000032096	9	44549647	44575928
Atp5l	ENSMUSG00000038717	9	44721333	44728825
Phldb1	ENSMUSG00000048537	9	44494387	44543281
U6	ENSMUSG00000088044	9	43713981	43714085
7SK	ENSMUSG00000088028	9	44171535	44171811
U6	ENSMUSG00000088793	9	44284499	44284615
SNORA40	ENSMUSG00000088398	9	44203880	44203998
SNORA2	ENSMUSG00000064658	9	44544896	44545030
U6atac	ENSMUSG00000080358	9	44705948	44706065
2810417H13Rik	ENSMUSG00000040204	9	65738044	65751073
Csnk1g1	ENSMUSG00000032384	9	65756781	65892816
Ppib	ENSMUSG00000032383	9	65907976	65914436
Snx22	ENSMUSG00000039452	9	65912983	65917538
Snx1	ENSMUSG00000032382	9	65935940	65974394
Fam96a	ENSMUSG00000032381	9	65974418	65986762
Dapk2	ENSMUSG00000032380	9	66006030	66120049
Herc1	ENSMUSG00000038664	9	66198257	66356582
Fbxl22	ENSMUSG00000050503	9	66356266	66362400
Usp3	ENSMUSG00000032376	9	66362444	66440949
Car12	ENSMUSG00000032373	9	66561493	66614652
Aph1b	ENSMUSG00000032375	9	66623009	66643297
Gm10647	ENSMUSG00000074232	9	66644846	66646881
Aph1c	ENSMUSG00000053040	9	66662801	66682533
Rab8b	ENSMUSG00000036943	9	66691479	66767512
Gm16218	ENSMUSG00000059571	9	65145339	65145726
Kbtbd13	ENSMUSG00000054978	9	65237944	65239459
Oaz2	ENSMUSG00000040652	9	65515808	65538107
Gm16073	ENSMUSG00000079915	9	65685974	65686490
Gm15563	ENSMUSG00000086387	9	66419808	66429866
BC050972	ENSMUSG00000092131	9	66646485	66652166
Ppp1r2-ps4	ENSMUSG00000059237	9	66653113	66653745
Gm17098	ENSMUSG00000091745	9	66682506	66683341
Plekho2	ENSMUSG00000050721	9	65402193	65427847
Ptplad1	ENSMUSG00000033629	9	64834792	64869524
Clpx	ENSMUSG00000015357	9	65142067	65178465
Pdcd7	ENSMUSG00000041837	9	65193875	65207450
Gm514	ENSMUSG00000086228	9	65208867	65228184
Rasl12	ENSMUSG00000041696	9	65246295	65262660
Ostb	ENSMUSG00000053862	9	65260560	65270580
Mtfmt	ENSMUSG00000059183	9	65283589	65300861
Spg21	ENSMUSG00000032388	9	65308744	65336277
Ankdd1a	ENSMUSG00000066510	9	65349260	65364806
2010321M09Rik	ENSMUSG00000034263	9	64808639	64834781
Parp16	ENSMUSG00000032392	9	65062497	65087026
Cilp	ENSMUSG00000042254	9	65112987	65128413
Rbpms2	ENSMUSG00000032387	9	65477455	65508335
Zfp609	ENSMUSG00000040524	9	65539391	65675371
Trip4	ENSMUSG00000032386	9	65678943	65756601
Igdcc3	ENSMUSG00000032394	9	64988961	65033664
Dpp8	ENSMUSG00000032393	9	64880265	64930457
Igdcc4	ENSMUSG00000032816	9	64949293	64985747
Slc24a1	ENSMUSG00000034452	9	64770668	64799414
Pif1	ENSMUSG00000041064	9	65434967	65443774
SNORA17	ENSMUSG00000077385	9	65800121	65800252
AC110235.1	ENSMUSG00000093316	9	65181085	65181318
U5	ENSMUSG00000075930	9	65049533	65049648
n-R5s85	ENSMUSG00000065387	9	65684160	65684272
U6	ENSMUSG00000065301	9	65748008	65748115
U5	ENSMUSG00000075763	9	65044379	65044494
AC122463.1	ENSMUSG00000093119	9	64819476	64819600
U6	ENSMUSG00000084437	9	66208448	66208549
AC161366.1	ENSMUSG00000089574	9	64989093	64989163
Rps27l	ENSMUSG00000036781	9	66793893	66797323
Lactb	ENSMUSG00000032370	9	66803200	66823291
U6	ENSMUSG00000089450	9	66828895	66828992
Tpm1	ENSMUSG00000032366	9	66870397	66897213
2310075C17Rik	ENSMUSG00000089718	9	112130083	112130746
2900079G21Rik	ENSMUSG00000087038	9	112136781	112251429
Prss50	ENSMUSG00000048752	9	110760471	110767132
Tmie	ENSMUSG00000049555	9	110768215	110782617
Als2cl	ENSMUSG00000044037	9	110782374	110803034
Tdgf1	ENSMUSG00000032494	9	110842114	110848662
Lrrc2	ENSMUSG00000032495	9	110854049	110886570
Rtp3	ENSMUSG00000066319	9	110887449	110892217
Gm10030	ENSMUSG00000057802	9	110907315	110909334
Ltf	ENSMUSG00000032496	9	110921796	110945270
Ccrl2	ENSMUSG00000043953	9	110957339	110959774
Lrrfip2	ENSMUSG00000032497	9	111020615	111128172
Mlh1	ENSMUSG00000032498	9	111130732	111174112
Epm2aip1	ENSMUSG00000046785	9	111174349	111181593
Trank1	ENSMUSG00000062296	9	111214243	111298278
Dclk3	ENSMUSG00000032500	9	111341585	111392115
Stac	ENSMUSG00000032502	9	111463941	111592852
Arpp21	ENSMUSG00000032503	9	111967595	112138442
SNORA17	ENSMUSG00000077751	9	112425033	112425164
Mir128-2	ENSMUSG00000065441	9	112021136	112021219
n-R5s90	ENSMUSG00000077156	9	111516402	111516519
7SK	ENSMUSG00000089082	9	111147096	111147371
U7	ENSMUSG00000088296	9	110977898	110977960
Zc3h12d	ENSMUSG00000039981	10	7552268	7590195
Tab2	ENSMUSG00000015755	10	7625451	7676028
Ust	ENSMUSG00000047712	10	7924551	8238623
Sash1	ENSMUSG00000015305	10	8442017	8605868
Gm9930	ENSMUSG00000053980	10	9252329	9255479
Samd5	ENSMUSG00000060487	10	9347057	9395006
Stxbp5	ENSMUSG00000019790	10	9475345	9620877
Gm17280	ENSMUSG00000091633	10	8604392	8606678
U6	ENSMUSG00000077582	10	8362732	8362837
Mir5104	ENSMUSG00000093060	10	7556179	7556272
SNORA36	ENSMUSG00000065692	10	8543809	8543945
AC091522.1	ENSMUSG00000093360	10	8498358	8498428
SNORA40	ENSMUSG00000088857	10	7568159	7568279
SNORA36	ENSMUSG00000064609	10	9571817	9571947
Rpl38	ENSMUSG00000057322	11	114529838	114533645
Ttyh2	ENSMUSG00000034714	11	114536745	114582291
Dnaic2	ENSMUSG00000034706	11	114588722	114619203
Kif19a	ENSMUSG00000010021	11	114626702	114652053
Btbd17	ENSMUSG00000000202	11	114652531	114657259
Gpr142	ENSMUSG00000034677	11	114660238	114668059
Gprc5c	ENSMUSG00000051043	11	114712466	114733931
Cd300a	ENSMUSG00000034652	11	114751355	114765968
Cd300lb	ENSMUSG00000063193	11	114784095	114795700
Cd300c	ENSMUSG00000058728	11	114817430	114830471
Cd300ld	ENSMUSG00000034641	11	114843588	114851236
AF251705	ENSMUSG00000044811	11	114858035	114863194
Gm11709	ENSMUSG00000089753	11	114871649	114877621
Gm11710	ENSMUSG00000069609	11	114882042	114888326
Gm11711	ENSMUSG00000089722	11	114892800	114899083
Cd300lh	ENSMUSG00000069607	11	114903445	114909723
Cd300e	ENSMUSG00000048498	11	114913231	114923491
Rab37	ENSMUSG00000020732	11	114952745	115023550
Cd300lf	ENSMUSG00000047798	11	114977528	114995306
Slc9a3r1	ENSMUSG00000020733	11	115024655	115042495
Nat9	ENSMUSG00000015542	11	115044146	115049173
Tmem104	ENSMUSG00000045980	11	115048801	115108337
Grin2c	ENSMUSG00000020734	11	115110483	115128557
Fdxr	ENSMUSG00000018861	11	115129338	115138364
Fads6	ENSMUSG00000044788	11	115140936	115158977
Otop2	ENSMUSG00000050201	11	115168477	115193617
Ush1g	ENSMUSG00000045288	11	115176506	115183355
Otop3	ENSMUSG00000018862	11	115196045	115208241
C630004H02Rik	ENSMUSG00000034586	11	115209021	115229070
Cdr2l	ENSMUSG00000050910	11	115243230	115257446
Ict1	ENSMUSG00000018858	11	115265066	115273988
Atp5h	ENSMUSG00000034566	11	115277003	115281276
Kctd2	ENSMUSG00000016940	11	115281440	115292588
4933422H20Rik	ENSMUSG00000070332	11	115301859	115309584
Slc16a5	ENSMUSG00000045775	11	115323788	115335712
Armc7	ENSMUSG00000057219	11	115336981	115351781
Nt5c	ENSMUSG00000020736	11	115351734	115353176
Hn1	ENSMUSG00000020737	11	115358667	115375701
Sumo2	ENSMUSG00000020738	11	115384416	115397590
Nup85	ENSMUSG00000020739	11	115425748	115445299
Gga3	ENSMUSG00000020740	11	115445569	115465365
Mrps7	ENSMUSG00000046756	11	115465239	115469350
Mif4gd	ENSMUSG00000020743	11	115469232	115474283
Slc25a19	ENSMUSG00000020744	11	115475492	115489595
Grb2	ENSMUSG00000059923	11	115505359	115569911
2310067B10Rik	ENSMUSG00000020747	11	115626747	115660680
Caskin2	ENSMUSG00000034471	11	115660497	115674953
Tsen54	ENSMUSG00000020781	11	115676038	115684408
Llgl2	ENSMUSG00000020782	11	115685363	115717094
Itgb4	ENSMUSG00000020758	11	115836023	115869726
Gm11689	ENSMUSG00000083769	11	114525922	114526223
Gm11698	ENSMUSG00000083237	11	114770045	114770499
Gm16831	ENSMUSG00000084868	11	116168178	116170824
Gm11699	ENSMUSG00000083677	11	114794185	114794585
C920011F04Rik	ENSMUSG00000085072	11	115267900	115269628
Gm11695	ENSMUSG00000085651	11	115323359	115324768
Gm11694	ENSMUSG00000081376	11	115354338	115354496
Gm11702	ENSMUSG00000084277	11	115518805	115518873
Gm11703	ENSMUSG00000083016	11	115585608	115586148
Gm11704	ENSMUSG00000084130	11	115590780	115590993
2210020M01Rik	ENSMUSG00000048442	11	115761280	115767583
Rpl29-ps3	ENSMUSG00000087072	11	115786341	115787457
Gm11721	ENSMUSG00000087064	11	115807764	115813419
Srp68	ENSMUSG00000020780	11	116106480	116135531
Galr2	ENSMUSG00000020793	11	116142253	116145252
Exoc7	ENSMUSG00000020792	11	116149315	116168547
Gm17246	ENSMUSG00000090902	11	115476776	115488021
B230344G16Rik	ENSMUSG00000084827	11	115849366	115855029
Recql5	ENSMUSG00000020752	11	115753909	115794791
H3f3b	ENSMUSG00000016559	11	115883226	115889276
Unk	ENSMUSG00000020770	11	115891636	115922528
Gm11692	ENSMUSG00000081548	11	114218443	114219575
4932435O22Rik	ENSMUSG00000062391	11	114274715	114310174
Unc13d	ENSMUSG00000057948	11	115923409	115939275
Galk1	ENSMUSG00000020766	11	115869771	115874033
Fbf1	ENSMUSG00000020776	11	116003599	116029480
1110017F19Rik	ENSMUSG00000075420	11	115773331	115775234
Sap30bp	ENSMUSG00000020755	11	115794596	115828039
Acox1	ENSMUSG00000020777	11	116033202	116060359
Myo15b	ENSMUSG00000034427	11	115722926	115753917
Wbp2	ENSMUSG00000034341	11	115939887	115948309
Trim47	ENSMUSG00000020773	11	115967066	115988524
Trim65	ENSMUSG00000054517	11	115983160	115992442
Mrpl38	ENSMUSG00000020775	11	115993131	116000182
2310004N24Rik	ENSMUSG00000020778	11	116060169	116076632
Cdk3-ps	ENSMUSG00000092300	11	116077317	116081601
Evpl	ENSMUSG00000034282	11	116081873	116099391
SNORA70	ENSMUSG00000089460	11	115588457	115588591
AL645852.1	ENSMUSG00000093539	11	115657138	115657200
Mir3968	ENSMUSG00000093096	11	115309275	115309374
AL645484.1	ENSMUSG00000092681	11	114430650	114430719
U6	ENSMUSG00000089476	11	115462970	115463076
AL603828.1	ENSMUSG00000089544	11	115114592	115114699
SCARNA4	ENSMUSG00000088290	11	116025224	116025350
Adck1	ENSMUSG00000021044	12	89598998	89700163
Nrxn3	ENSMUSG00000066392	12	89961320	91573375
CT572991.1	ENSMUSG00000092733	12	89817159	89817266
AC154495.1	ENSMUSG00000077853	12	90086461	90086548
AC161049.1	ENSMUSG00000080680	12	90669780	90669845
Serpina1e	ENSMUSG00000072849	12	105185141	105197185
Serpina11	ENSMUSG00000063232	12	105218453	105228167
Serpina9	ENSMUSG00000058260	12	105232953	105251965
Serpina12	ENSMUSG00000041567	12	105266979	105282653
Serpina5	ENSMUSG00000041550	12	105339323	105344347
Serpina3a	ENSMUSG00000041536	12	105350934	105360106
Serpina3b	ENSMUSG00000066364	12	105366206	105377755
Serpina3c	ENSMUSG00000066361	12	105384592	105392080
Serpina3f	ENSMUSG00000066363	12	105452754	105459339
Serpina3g	ENSMUSG00000041481	12	105474455	105480149
Serpina3i	ENSMUSG00000079014	12	105501332	105507582
Serpina3j	ENSMUSG00000079013	12	105552763	105558935
Serpina3k	ENSMUSG00000058207	12	105576696	105583951
Serpina3m	ENSMUSG00000079012	12	105625374	105632467
Serpina3n	ENSMUSG00000021091	12	105644939	105652539
Gsc	ENSMUSG00000021095	12	105709419	105711537
Gm10000	ENSMUSG00000056606	12	105712698	105715699
Dicer1	ENSMUSG00000041415	12	105925952	105990162
Clmn	ENSMUSG00000021097	12	106001324	106103286
4930408O17Rik	ENSMUSG00000021101	12	106103540	106109734
4831426I19Rik	ENSMUSG00000054150	12	106168159	106248019
Glrx5	ENSMUSG00000021102	12	106270899	106279120
Tcl1b2	ENSMUSG00000060863	12	106384224	106393435
Tcl1b1	ENSMUSG00000066359	12	106397900	106404832
Tcl1b5	ENSMUSG00000000701	12	106414568	106419353
Tcl1b3	ENSMUSG00000068940	12	106429070	106433820
Tcl1b4	ENSMUSG00000079007	12	106440167	106445203
Tcl1	ENSMUSG00000041359	12	106454960	106461003
Bdkrb2	ENSMUSG00000021070	12	106801382	106831281
Bdkrb1	ENSMUSG00000041347	12	106842301	106843638
Atg2b	ENSMUSG00000041341	12	106851749	106923451
4933433P14Rik	ENSMUSG00000044715	12	106923562	106941257
Ak7	ENSMUSG00000041323	12	106944192	107020657
Papola	ENSMUSG00000021111	12	107018512	107077154
Gm17198	ENSMUSG00000092040	12	105156942	105164501
RP23-309A11.8	ENSMUSG00000093753	12	105223002	105234789
Serpina4-ps1	ENSMUSG00000092075	12	105318859	105324934
Serpina3d-ps	ENSMUSG00000091573	12	105411513	105416506
Serpina3e-ps	ENSMUSG00000091553	12	105427727	105431136
Serpina3h	ENSMUSG00000041449	12	105486115	105491879
Serpina3l-ps	ENSMUSG00000091157	12	105596213	105601744
RP23-90I17.3	ENSMUSG00000093605	12	106454967	106455793
2810011L19Rik	ENSMUSG00000086023	12	106574804	106622141
AC144543.1	ENSMUSG00000093331	12	107103934	107104003
SNORA17	ENSMUSG00000077398	12	105657483	105657610
5S_rRNA	ENSMUSG00000087854	12	106884053	106884181
Scarna13	ENSMUSG00000088789	12	106269285	106269559
AC142112.1	ENSMUSG00000093356	12	105347493	105347600
3110018I06Rik	ENSMUSG00000060375	12	108726842	108727846
Bcl11b	ENSMUSG00000048251	12	109148613	109241812
Setd3	ENSMUSG00000056770	12	109344641	109417524
Ccnk	ENSMUSG00000021258	12	109424580	109441569
Ccdc85c	ENSMUSG00000084883	12	109444555	109513627
Hhipl1	ENSMUSG00000021260	12	109544480	109566510
Cyp46a1	ENSMUSG00000021259	12	109572587	109600441
Eml1	ENSMUSG00000058070	12	109609167	109777827
Evl	ENSMUSG00000021262	12	109792930	109926723
Degs2	ENSMUSG00000021263	12	109925002	109940516
Yy1	ENSMUSG00000021264	12	110031183	110054842
Slc25a29	ENSMUSG00000021265	12	110064083	110074093
Slc25a47	ENSMUSG00000048856	12	110089339	110095024
Wars	ENSMUSG00000021266	12	110098240	110132384
Wdr25	ENSMUSG00000040877	12	110132482	110266662
Begain	ENSMUSG00000040867	12	110270397	110291589
Gm2800	ENSMUSG00000084871	12	108421765	108424944
Gm5187	ENSMUSG00000082362	12	108443286	108444276
Gm17052	ENSMUSG00000090607	12	108657351	108657639
Gm9006	ENSMUSG00000079359	12	108851210	108852050
4930465M20Rik	ENSMUSG00000085641	12	108961950	108973706
Gm15208	ENSMUSG00000086975	12	108982346	109022251
Gm15636	ENSMUSG00000082203	12	109678740	109679480
4930478K11Rik	ENSMUSG00000085954	12	109551989	109566240
Gm16596	ENSMUSG00000087576	12	109774610	109793824
Mir342	ENSMUSG00000065436	12	109896830	109896928
U6	ENSMUSG00000088217	12	110100774	110100879
Mir345	ENSMUSG00000065429	12	110075183	110075278
AC139568.1	ENSMUSG00000093173	12	109960058	109960134
Dlk1	ENSMUSG00000040856	12	110691033	110701546
Rtl1	ENSMUSG00000085925	12	110827404	110838540
Dio3	ENSMUSG00000075707	12	111517278	111519307
Ppp2r5c	ENSMUSG00000017843	12	111685518	111821271
Dync1h1	ENSMUSG00000018707	12	111839662	111905155
1700001K19Rik	ENSMUSG00000056508	12	111905899	111920829
Hsp90aa1	ENSMUSG00000021270	12	111928815	111940938
Wdr20a	ENSMUSG00000037957	12	111976154	112042450
Stk30	ENSMUSG00000056458	12	112046008	112079149
Zfp839	ENSMUSG00000021271	12	112088489	112107312
Gm3452	ENSMUSG00000091498	12	112096775	112097104
Meg3	ENSMUSG00000021268	12	110779211	110809936
Gm17111	ENSMUSG00000090327	12	111903102	111903618
Gm17639	ENSMUSG00000090521	12	110806838	110809933
Rian	ENSMUSG00000091793	12	110842155	110899919
Mirg	ENSMUSG00000091158	12	110973191	110987665
Dio3os	ENSMUSG00000090962	12	111513594	111516278
4921507G05Rik	ENSMUSG00000091769	12	112079239	112082014
Gm17712	ENSMUSG00000092102	12	112080486	112083426
SNORD113	ENSMUSG00000084604	12	110926265	110926335
SNORD113	ENSMUSG00000084549	12	110887827	110887898
Mir337	ENSMUSG00000065526	12	110824000	110824096
Mir379	ENSMUSG00000065498	12	110947235	110947357
SNORD112	ENSMUSG00000089449	12	110844667	110844743
SNORD113	ENSMUSG00000088820	12	110927687	110927754
AF357341	ENSMUSG00000065022	12	110919729	110919803
Mir673	ENSMUSG00000076316	12	110810200	110810290
Mir487b	ENSMUSG00000076219	12	110965543	110965624
Mir3072	ENSMUSG00000093351	12	110986088	110986170
Mir412	ENSMUSG00000065570	12	110981499	110981578
Mir1193	ENSMUSG00000080411	12	110953881	110954001
Mir154	ENSMUSG00000065448	12	110976634	110976717
SNORD113	ENSMUSG00000064487	12	110919010	110919084
Mir496	ENSMUSG00000070136	12	110977329	110977407
Mir431	ENSMUSG00000070080	12	110828657	110828747
Mir539	ENSMUSG00000076063	12	110966339	110966412
Mir370	ENSMUSG00000065433	12	110856468	110856546
Mir667	ENSMUSG00000076396	12	110958216	110958307
AC121784.1	ENSMUSG00000093089	12	110981368	110981447
SNORD113	ENSMUSG00000064726	12	110925008	110925079
Mir1197	ENSMUSG00000080687	12	110950527	110950646
Mir433	ENSMUSG00000070072	12	110829925	110830048
Mir136	ENSMUSG00000070129	12	110833527	110833608
Mir411	ENSMUSG00000065477	12	110948385	110948480
SNORD113	ENSMUSG00000084487	12	110923172	110923244
AF357355	ENSMUSG00000064621	12	110892837	110892908
AC121784.4	ENSMUSG00000093291	12	110948819	110948935
AF357425	ENSMUSG00000088294	12	110874222	110874294
SNORD113	ENSMUSG00000064679	12	110895335	110895406
SNORD113	ENSMUSG00000065013	12	110891243	110891314
SNORD113	ENSMUSG00000064452	12	110869284	110869358
Mir3070b	ENSMUSG00000093209	12	110826802	110826890
SNORD113	ENSMUSG00000084691	12	110884339	110884412
SNORD113	ENSMUSG00000065757	12	110912123	110912204
Mir382	ENSMUSG00000065428	12	110971979	110972058
SNORD113	ENSMUSG00000064720	12	110921204	110921278
AC121784.2	ENSMUSG00000093218	12	110961966	110962085
SNORD113	ENSMUSG00000089517	12	110879232	110879304
Mir300	ENSMUSG00000065419	12	110962523	110962601
AC161253.1	ENSMUSG00000092647	12	110557662	110557726
Mir434	ENSMUSG00000070133	12	110832716	110832809
Mir494	ENSMUSG00000070141	12	110953528	110953612
Mir1188	ENSMUSG00000080406	12	110850032	110850151
Mir341	ENSMUSG00000070101	12	110849710	110849805
Mir543	ENSMUSG00000076241	12	110955466	110955545
Mir377	ENSMUSG00000065438	12	110978720	110978787
AC152063.1	ENSMUSG00000077879	12	110856324	110856410
Mir654	ENSMUSG00000077980	12	110961428	110961511
Mir432	ENSMUSG00000087855	12	110833166	110833240
AF357428	ENSMUSG00000065749	12	110918155	110918223
Mir1247	ENSMUSG00000080356	12	111516258	111516339
SNORD113	ENSMUSG00000089509	12	110871978	110872052
Mir1906-1	ENSMUSG00000084535	12	110782751	110782830
SNORD113	ENSMUSG00000064496	12	110889634	110889706
Mir381	ENSMUSG00000065566	12	110965032	110965106
Mir485	ENSMUSG00000070128	12	110973109	110973187
Mir544	ENSMUSG00000077001	12	110967535	110967612
Mir127	ENSMUSG00000070076	12	110831042	110831138
AC161253.2	ENSMUSG00000093231	12	110559180	110559246
Mir541	ENSMUSG00000076052	12	110980619	110980708
Mir3070a	ENSMUSG00000092946	12	110826153	110826241
SNORD113	ENSMUSG00000087885	12	110881958	110882028
Mir665	ENSMUSG00000076313	12	110824524	110824617
Mir453	ENSMUSG00000077925	12	110973829	110973910
Mir679	ENSMUSG00000076145	12	110953787	110953860
Mir493	ENSMUSG00000077025	12	110818443	110818525
Mir134	ENSMUSG00000065426	12	110972349	110972419
Mir758	ENSMUSG00000076459	12	110951020	110951100
Mir540	ENSMUSG00000072900	12	110824281	110824364
Mir323	ENSMUSG00000065617	12	110950718	110950803
SNORD113	ENSMUSG00000064545	12	110920594	110920668
Mir882	ENSMUSG00000077881	12	110920407	110920483
Mir495	ENSMUSG00000070105	12	110956957	110957036
AC121784.3	ENSMUSG00000093224	12	110949989	110950100
Mir410	ENSMUSG00000065497	12	110981925	110982005
Mir770	ENSMUSG00000076451	12	110801902	110801995
Mir376b	ENSMUSG00000076006	12	110961666	110961751
Mir666	ENSMUSG00000076272	12	110955295	110955393
SNORD113	ENSMUSG00000064417	12	110894555	110894626
Mir329	ENSMUSG00000065577	12	110951691	110951787
Mir369	ENSMUSG00000065561	12	110981628	110981706
A830082K12Rik	ENSMUSG00000087143	13	78337278	78375825
Gm8327	ENSMUSG00000086982	13	78338999	78339776
Mctp1	ENSMUSG00000021596	13	76521983	77171071
Ankrd32	ENSMUSG00000021597	13	77182349	77274734
2210408I21Rik	ENSMUSG00000071252	13	77274797	77752940
Fam172a	ENSMUSG00000064138	13	77847951	78305499
Pou5f2	ENSMUSG00000093668	13	78162174	78165557
Nr2f1	ENSMUSG00000069171	13	78328234	78339018
CT025603.1	ENSMUSG00000080389	13	78500358	78500450
SNORA17	ENSMUSG00000088521	13	77816082	77816212
U7	ENSMUSG00000089243	13	78686645	78686706
SNORA48	ENSMUSG00000088435	13	79300980	79301123
U6	ENSMUSG00000065339	13	79594231	79594337
U4	ENSMUSG00000084661	13	80297924	80298051
1700023H06Rik	ENSMUSG00000089827	13	81023485	81024785
Arrdc3	ENSMUSG00000074794	13	81022645	81035296
Gm4211	ENSMUSG00000091211	13	81096926	81102991
Gm8399	ENSMUSG00000043889	13	81203683	81204802
Gpr98	ENSMUSG00000069170	13	81234067	81772153
Polr3g	ENSMUSG00000035834	13	81812842	81850012
Lysmd3	ENSMUSG00000035840	13	81796805	81810887
9330111N05Rik	ENSMUSG00000085266	13	81102149	81267863
AC154824.1	ENSMUSG00000092650	13	81204476	81204559
Mblac2	ENSMUSG00000051098	13	81850416	81892274
Gm17259	ENSMUSG00000091982	13	81917772	81922748
Cetn3	ENSMUSG00000021537	13	81922291	81936142
SNORA17	ENSMUSG00000088923	13	82189750	82189880
Gm6211	ENSMUSG00000091577	13	103949875	103954149
2610204G07Rik	ENSMUSG00000084860	13	105475011	105485074
Sgtb	ENSMUSG00000042743	13	104899821	104931815
Gm5454	ENSMUSG00000047643	13	104146330	104147784
Gm16416	ENSMUSG00000063162	13	104187189	104187671
Srek1	ENSMUSG00000032621	13	104531695	104564539
Erbb2ip	ENSMUSG00000021709	13	104608867	104710594
Nln	ENSMUSG00000021710	13	104813488	104899694
Mast4	ENSMUSG00000034751	13	103522566	104124577
Ppwd1	ENSMUSG00000021713	13	104995201	105018924
Cenpk	ENSMUSG00000021714	13	105019035	105041728
2410002O22Rik	ENSMUSG00000021711	13	104932229	104968549
2410002O22Rik	ENSMUSG00000078936	13	104963802	104968519
Trim23	ENSMUSG00000021712	13	104968877	104993452
Adamts6	ENSMUSG00000046169	13	105077953	105284843
Cwc27	ENSMUSG00000021715	13	105421220	105607222
Srek1ip1	ENSMUSG00000021716	13	105582564	105629354
7SK	ENSMUSG00000087860	13	104210882	104211162
n-R5s56	ENSMUSG00000064455	13	104186282	104186386
U6	ENSMUSG00000064922	13	104432006	104432112
Fam159b	ENSMUSG00000042655	13	105635363	105653973
1700110M21Rik	ENSMUSG00000042888	14	101596908	101599286
Tbc1d4	ENSMUSG00000033083	14	101841577	102008408
Commd6	ENSMUSG00000075486	14	102032983	102039903
Uchl3	ENSMUSG00000022111	14	102053184	102095341
Gm9922	ENSMUSG00000053821	14	102128597	102129031
Lmo7	ENSMUSG00000033060	14	102129145	102349230
SNORA17	ENSMUSG00000077605	14	102728747	102728878
SNORA61	ENSMUSG00000089041	14	101682284	101682419
U6	ENSMUSG00000088160	14	101159385	101159485
AC126033.1	ENSMUSG00000092668	14	101099838	101099954
Cln5	ENSMUSG00000022125	14	103469433	103476796
Gm17446	ENSMUSG00000090648	14	103377437	103381745
Kctd12	ENSMUSG00000048107	14	103377437	103381745
Gm9307	ENSMUSG00000091668	14	103409426	103410156
Fbxl3	ENSMUSG00000022124	14	103479456	103498783
Mycbp2	ENSMUSG00000033004	14	103512628	103746031
Irg1	ENSMUSG00000022126	14	103446194	103455790
5S_rRNA	ENSMUSG00000088971	14	103205316	103205363
CT009530.1	ENSMUSG00000093633	14	103187573	103187654
Mir5130	ENSMUSG00000092901	14	103381766	103381849
Dnahc5	ENSMUSG00000022262	15	28133507	28401800
SNORA17	ENSMUSG00000088045	15	29933941	29934018
SNORA17	ENSMUSG00000089279	15	29933817	29933889
Mir3964	ENSMUSG00000092639	15	29643086	29643159
SNORA73	ENSMUSG00000065726	15	29982134	29982311
AC122448.1	ENSMUSG00000092766	15	29968582	29968642
SNORA17	ENSMUSG00000088621	15	29818096	29818229
Ctnnd2	ENSMUSG00000022240	15	30102348	30959066
Zfpm2	ENSMUSG00000022306	15	40486588	40936138
Oxr1	ENSMUSG00000022307	15	41279028	41692594
Abra	ENSMUSG00000042895	15	41696839	41701266
Angpt1	ENSMUSG00000022309	15	42256273	42508523
4930555K19Rik	ENSMUSG00000048559	15	41005247	41005417
Gm16718	ENSMUSG00000086242	15	41589606	41620457
Gm17473	ENSMUSG00000091009	15	42507806	42536162
SNORA17	ENSMUSG00000088469	15	41780543	41780644
Rspo2	ENSMUSG00000051920	15	42852357	43002364
7SK	ENSMUSG00000087905	15	43056171	43056466
Eif3e	ENSMUSG00000022336	15	43081586	43114282
Gm10373	ENSMUSG00000072592	15	43262489	43308582
Ttc35	ENSMUSG00000022337	15	43308775	43359323
U7	ENSMUSG00000088831	15	43504110	43504173
Tmem74	ENSMUSG00000054409	15	43698241	43701575
Trhr	ENSMUSG00000038760	15	44027681	44067458
Nudcd1	ENSMUSG00000038736	15	44206773	44259853
SNORA17	ENSMUSG00000088756	15	44177196	44177321
SNORA17	ENSMUSG00000077181	15	44195631	44195762
Eny2	ENSMUSG00000022338	15	44259657	44269231
Pkhd1l1	ENSMUSG00000038725	15	44289099	44428689
U6	ENSMUSG00000065855	15	44264141	44264247
Ebag9	ENSMUSG00000022339	15	44451187	44472570
Sybu	ENSMUSG00000022340	15	44503405	44619609
A930017M01Rik	ENSMUSG00000090446	15	44715020	44715856
A930017M01Rik	ENSMUSG00000060530	15	44712926	44714601
2310069G16Rik	ENSMUSG00000085947	15	44619328	44637373
Gm5471	ENSMUSG00000058463	15	44803340	44803681
SNORA48	ENSMUSG00000089589	15	44779650	44779792
U6	ENSMUSG00000089137	15	44772088	44772181
Kcnv1	ENSMUSG00000022342	15	44937830	44946480
Kcnk9	ENSMUSG00000036760	15	72342549	72376709
Trappc9	ENSMUSG00000047921	15	72420051	72891634
Gm3150	ENSMUSG00000078297	15	72743784	72744235
Chrac1	ENSMUSG00000068391	15	72920822	72927984
Eif2c2	ENSMUSG00000036698	15	72929022	73015270
Ptk2	ENSMUSG00000022607	15	73035535	73253621
Gm10362	ENSMUSG00000072489	15	73258786	73259370
Dennd3	ENSMUSG00000036661	15	73342990	73402672
Slc45a4	ENSMUSG00000079020	15	73407854	73476192
Gpr20	ENSMUSG00000045281	15	73525034	73537935
Ptp4a3	ENSMUSG00000059895	15	73553575	73589196
Gm628	ENSMUSG00000072487	15	73591840	73670129
Gm6569	ENSMUSG00000086361	15	73664991	73670338
Gm7935	ENSMUSG00000075609	15	73910438	73911986
Bai1	ENSMUSG00000034730	15	74346626	74419873
Eif2c2	ENSMUSG00000093631	15	72926274	72927114
Gm3244	ENSMUSG00000083380	15	73639937	73640326
Gm15387	ENSMUSG00000082585	15	73924116	73924763
SNORA70	ENSMUSG00000088005	15	73180229	73180351
U4	ENSMUSG00000084493	15	73559594	73559720
Mir151	ENSMUSG00000065612	15	73085245	73085312
AC117657.1	ENSMUSG00000093340	15	74394251	74394345
1700016M24Rik	ENSMUSG00000022603	15	74436459	74466728
Arc	ENSMUSG00000022602	15	74499513	74503000
Jrk	ENSMUSG00000046380	15	74532842	74539965
4933427E11Rik	ENSMUSG00000044276	15	74539591	74540804
Psca	ENSMUSG00000022598	15	74545269	74547493
Lypd2	ENSMUSG00000022595	15	74549460	74564743
4930572J05Rik	ENSMUSG00000056665	15	74551664	74554803
Slurp1	ENSMUSG00000022596	15	74557074	74558456
2300005B03Rik	ENSMUSG00000075605	15	74573269	74577117
Lynx1	ENSMUSG00000022594	15	74578286	74583409
Ly6d	ENSMUSG00000034634	15	74592486	74593997
Gm17189	ENSMUSG00000091709	15	74614495	74631070
Ly6k	ENSMUSG00000044678	15	74627304	74630416
Gml	ENSMUSG00000068349	15	74643884	74649245
Hemt1	ENSMUSG00000068600	15	74649501	74654866
Cyp11b1	ENSMUSG00000075604	15	74665004	74672073
2010109I03Rik	ENSMUSG00000063522	15	74708766	74712134
Cyp11b2	ENSMUSG00000022589	15	74681440	74686748
Ly6e	ENSMUSG00000022587	15	74785481	74790335
Ly6i	ENSMUSG00000022586	15	74810242	74813860
Ly6a	ENSMUSG00000075602	15	74825308	74828064
Ly6c1	ENSMUSG00000079018	15	74875447	74879260
Ly6c2	ENSMUSG00000022584	15	74938590	74942114
Ly6g	ENSMUSG00000022582	15	74987123	74989169
BC025446	ENSMUSG00000047728	15	75047022	75053089
Gm10238	ENSMUSG00000068348	15	75066079	75069198
Cldn16	ENSMUSG00000038148	16	26463221	26482851
Tmem207	ENSMUSG00000091972	16	26503879	26526857
Il1rap	ENSMUSG00000022514	16	26581790	26730203
Gm606	ENSMUSG00000068428	16	26957322	26990060
Ostn	ENSMUSG00000052276	16	27307575	27351298
Uts2d	ENSMUSG00000056423	16	27353408	27370325
Ccdc50	ENSMUSG00000038127	16	27388955	27452304
Fgf12	ENSMUSG00000022523	16	28160206	28445313
Gm20319	ENSMUSG00000092545	16	26714532	26755588
Gm15970	ENSMUSG00000089705	16	27343197	27344030
Ncam2	ENSMUSG00000022762	16	81200942	81624530
SNORA17	ENSMUSG00000088476	16	80137597	80137712
7SK	ENSMUSG00000084671	16	81261948	81262260
U6	ENSMUSG00000089138	16	80685470	80685568
U6	ENSMUSG00000070247	16	82543474	82543580
Rpl21-ps5	ENSMUSG00000071475	16	83371496	83371978
U6	ENSMUSG00000070158	16	84294780	84294886
Tiam1	ENSMUSG00000002489	16	89787356	90144014
Sod1	ENSMUSG00000022982	16	90220987	90226567
Scaf4	ENSMUSG00000022983	16	90229202	90284670
Hunk	ENSMUSG00000053414	16	90386642	90499798
1110008E08Rik	ENSMUSG00000046119	16	90554409	90555129
2610039C10Rik	ENSMUSG00000022978	16	90719557	90727649
Mrap	ENSMUSG00000039956	16	90738569	90750030
Urb1	ENSMUSG00000039929	16	90751772	90810658
4931408A02Rik	ENSMUSG00000039903	16	90826964	90905354
1110004E09Rik	ENSMUSG00000022972	16	90926054	90935172
Synj1	ENSMUSG00000022973	16	90936337	91011553
Gcfc1	ENSMUSG00000022974	16	91014282	91044788
4932438H23Rik	ENSMUSG00000039851	16	91054180	91095367
Gm9881	ENSMUSG00000052471	16	91168442	91171646
Olig2	ENSMUSG00000039830	16	91225795	91228922
Olig1	ENSMUSG00000046160	16	91270014	91272184
Ifnar2	ENSMUSG00000022971	16	91373028	91405834
RP23-190G10.4	ENSMUSG00000093701	16	91391966	91419696
Il10rb	ENSMUSG00000022969	16	91406409	91426079
Ifnar1	ENSMUSG00000022967	16	91485483	91507686
Ifngr2	ENSMUSG00000022965	16	91547317	91565414
Tmem50b	ENSMUSG00000022964	16	91574748	91598045
Dnajc28	ENSMUSG00000039763	16	91614502	91619271
Gart	ENSMUSG00000022962	16	91621431	91647197
Son	ENSMUSG00000022961	16	91647751	91679466
Donson	ENSMUSG00000022960	16	91677513	91689010
Atp5o	ENSMUSG00000022956	16	91684643	91931932
Cryzl1	ENSMUSG00000058240	16	91689567	91729220
Itsn1	ENSMUSG00000022957	16	91729526	91920842
Gm17518	ENSMUSG00000091946	16	90727757	90729365
Gm7831	ENSMUSG00000083226	16	90915425	90915976
Gm15965	ENSMUSG00000085279	16	90984152	90987482
4930404I05Rik	ENSMUSG00000087354	16	91011494	91016988
4931406G06Rik	ENSMUSG00000085398	16	91044901	91056922
H3f3a-ps2	ENSMUSG00000081176	16	91114434	91114844
Gm15966	ENSMUSG00000085865	16	91320697	91329240
A930006K02Rik	ENSMUSG00000084866	16	91465349	91470366
Gm7856	ENSMUSG00000084301	16	91513386	91514878
Gm7860	ENSMUSG00000082535	16	91539427	91540305
Gm15964	ENSMUSG00000085337	16	91611713	91624106
Gm10785	ENSMUSG00000085169	16	91689156	91715887
AC122218.1	ENSMUSG00000092779	16	89907223	89907305
SNORA32	ENSMUSG00000064471	16	90602741	90602862
U4	ENSMUSG00000065811	16	91349947	91350029
AC134560.1	ENSMUSG00000093256	16	90954040	90954113
Mrps6	ENSMUSG00000039680	16	92058515	92112472
Slc5a3	ENSMUSG00000089774	16	92058567	92087718
Kcne2	ENSMUSG00000039672	16	92292634	92298374
Fam165b	ENSMUSG00000051989	16	92301531	92313286
Gm16309	ENSMUSG00000079514	16	92078307	92084053
Gm15976	ENSMUSG00000087240	16	91924683	91928880
D430001F17Rik	ENSMUSG00000087190	16	91931482	91963160
Gm16310	ENSMUSG00000086331	16	92094813	92096735
Gm15980	ENSMUSG00000085637	16	92308961	92312711
U6	ENSMUSG00000089293	16	92042922	92043019
U6	ENSMUSG00000064623	16	91921554	91921660
4930563D23Rik	ENSMUSG00000051728	16	92319008	92321686
Kcne1	ENSMUSG00000039639	16	92346246	92359713
Rcan1	ENSMUSG00000022951	16	92392198	92466391
2410124H12Rik	ENSMUSG00000051297	16	92478988	92497610
Clic6	ENSMUSG00000022949	16	92485981	92541488
Runx1	ENSMUSG00000022952	16	92601712	92826311
Gm16801	ENSMUSG00000086934	16	92613059	92620350
Mir802	ENSMUSG00000076457	16	93369965	93370061
Setd4	ENSMUSG00000022948	16	93583702	93604308
Cbr1	ENSMUSG00000051483	16	93608082	93610750
Gm5678	ENSMUSG00000082815	16	93628342	93630591
7SK	ENSMUSG00000084591	16	93654569	93654846
Cbr3	ENSMUSG00000022947	16	93683460	93691235
Dopey2	ENSMUSG00000022946	16	93712152	93810830
Morc3	ENSMUSG00000039456	16	93832366	93876317
Chaf1b	ENSMUSG00000022945	16	93884146	93906360
Cldn14	ENSMUSG00000047109	16	93919276	94009082
Sim2	ENSMUSG00000062713	16	94086061	94347498
2310043M15Rik	ENSMUSG00000091302	16	93792395	93795133
Hlcs	ENSMUSG00000040820	16	94350488	94535170
CT573086.1	ENSMUSG00000076304	16	94390909	94391018
Gm6363	ENSMUSG00000041929	16	94463881	94464954
Ripply3	ENSMUSG00000022941	16	94550027	94558542
Pigp	ENSMUSG00000022940	16	94580370	94592622
Gm15310	ENSMUSG00000089814	16	94580548	94580919
Ttc3	ENSMUSG00000040785	16	94592225	94690829
Erg	ENSMUSG00000040732	16	95580776	95808200
Ets2	ENSMUSG00000022895	16	95923682	95942658
Psmg1	ENSMUSG00000022913	16	96201540	96212567
Brwd1	ENSMUSG00000022914	16	96213699	96304133
Hmgn1	ENSMUSG00000040681	16	96342225	96349336
Wrb	ENSMUSG00000023147	16	96367014	96379459
Lca5l	ENSMUSG00000045275	16	96380014	96413864
Sh3bgr	ENSMUSG00000040666	16	96422077	96450540
B3galt5	ENSMUSG00000074892	16	96457408	96541466
Igsf5	ENSMUSG00000000159	16	96583275	96747187
Itgb2l	ENSMUSG00000000157	16	96643895	96665226
Pcp4	ENSMUSG00000090223	16	96689213	96747400
Dscam	ENSMUSG00000050272	16	96813686	97392359
Bace2	ENSMUSG00000040605	16	97578335	97660619
Mx1	ENSMUSG00000000386	16	97668642	97684514
Fam3b	ENSMUSG00000022938	16	97692657	97726543
2810404F17Rik	ENSMUSG00000085329	16	96027636	96029924
1600002D24Rik	ENSMUSG00000086899	16	96052730	96150684
Gm15340	ENSMUSG00000085903	16	96122005	96123335
Gm15342	ENSMUSG00000085884	16	96257697	96260350
1700093J21Rik	ENSMUSG00000022915	16	96304283	96310677
Gm15341	ENSMUSG00000086093	16	96320106	96335428
Gm15317	ENSMUSG00000087282	16	96367083	96369191
Gm9242	ENSMUSG00000059132	16	97711654	97712727
5S_rRNA	ENSMUSG00000088269	16	97720523	97720629
Mx2	ENSMUSG00000023341	16	97757690	97782506
Tmprss2	ENSMUSG00000000385	16	97786291	97832802
Ripk4	ENSMUSG00000005251	16	97963540	97985344
Prdm15	ENSMUSG00000014039	16	98013074	98073457
C2cd2	ENSMUSG00000045975	16	98076817	98144243
Zfp295	ENSMUSG00000046962	16	98168599	98183786
B230307C23Rik	ENSMUSG00000080717	16	98218488	98231165
C030010L15Rik	ENSMUSG00000091751	16	98215766	98218584
C2	ENSMUSG00000024371	17	34993357	35035210
Zbtb12	ENSMUSG00000049823	17	35016428	35033787
Ehmt2	ENSMUSG00000013787	17	35035414	35050997
Slc44a4	ENSMUSG00000007034	17	35051411	35067381
Neu1	ENSMUSG00000007038	17	35068198	35072898
Hspa1b	ENSMUSG00000090877	17	35093381	35096183
Hspa1a	ENSMUSG00000091971	17	35106144	35109069
Gm20481	ENSMUSG00000092609	17	35106857	35109081
Hspa1l	ENSMUSG00000007033	17	35109648	35116229
Lsm2	ENSMUSG00000007050	17	35118807	35122836
D17H6S56E-5	ENSMUSG00000091747	17	35133681	35138609
Vars	ENSMUSG00000007029	17	35137932	35153267
D17H6S56E-3	ENSMUSG00000007030	17	35153524	35163686
Ng23	ENSMUSG00000036185	17	35162904	35164961
Msh5	ENSMUSG00000007035	17	35165550	35183690
Clic1	ENSMUSG00000007041	17	35186911	35195694
Ddah2	ENSMUSG00000007039	17	35195980	35199040
AU023871	ENSMUSG00000073414	17	35199638	35203129
Ly6g6c	ENSMUSG00000007044	17	35202333	35206570
Ly6g6c	ENSMUSG00000092586	17	35204270	35206995
Ly6g6d	ENSMUSG00000073413	17	35208388	35215010
Ly6g6e	ENSMUSG00000013766	17	35213847	35215749
Ly6g6f	ENSMUSG00000034923	17	35217425	35222555
Abhd16a	ENSMUSG00000007036	17	35226208	35239932
Ly6g5c	ENSMUSG00000034482	17	35245224	35248936
Ly6g5b	ENSMUSG00000043807	17	35250893	35252373
Csnk2b	ENSMUSG00000024387	17	35253141	35258998
Gpank1	ENSMUSG00000092417	17	35258400	35261759
D17H6S53E	ENSMUSG00000043311	17	35263318	35265800
Apom	ENSMUSG00000024391	17	35265942	35268995
Bag6	ENSMUSG00000024392	17	35272123	35284265
Prrc2a	ENSMUSG00000024393	17	35286021	35301842
Aif1	ENSMUSG00000024397	17	35307936	35313013
Lst1	ENSMUSG00000073412	17	35322040	35325384
Ltb	ENSMUSG00000024399	17	35331384	35333265
Tnf	ENSMUSG00000024401	17	35336326	35338952
Lta	ENSMUSG00000024402	17	35340110	35342296
Nfkbil1	ENSMUSG00000042419	17	35357120	35372737
Gm16181	ENSMUSG00000081650	17	35357779	35361079
Atp6v1g2	ENSMUSG00000024403	17	35370605	35375712
Ddx39b	ENSMUSG00000019432	17	35378691	35390652
H2-D1	ENSMUSG00000073411	17	35399675	35404444
H2-Q1	ENSMUSG00000079507	17	35457350	35462044
H2-Q2	ENSMUSG00000091705	17	35479187	35483707
H2-Q4	ENSMUSG00000035929	17	35516562	35522235
H2-Q6	ENSMUSG00000073409	17	35561795	35567000
H2-Q7	ENSMUSG00000060550	17	35576100	35580714
H2-Q10	ENSMUSG00000067235	17	35607034	35611508
Pou5f1	ENSMUSG00000024406	17	35642982	35647721
Tcf19	ENSMUSG00000050410	17	35649679	35653769
Cchcr1	ENSMUSG00000040312	17	35654045	35667960
Psors1c2	ENSMUSG00000024409	17	35670146	35671592
Cdsn	ENSMUSG00000039518	17	35689073	35694125
2300002M23Rik	ENSMUSG00000039269	17	35704395	35705897
Sfta2	ENSMUSG00000090509	17	35738494	35787516
Gm9573	ENSMUSG00000090588	17	35754868	35763582
Dpcr1	ENSMUSG00000073408	17	35772697	35780640
Vars2	ENSMUSG00000038838	17	35792579	35804537
Gtf2h4	ENSMUSG00000001524	17	35804675	35810684
Ddr1	ENSMUSG00000003534	17	35818512	35841566
Ier3	ENSMUSG00000003541	17	35958629	35959868
Flot1	ENSMUSG00000059714	17	35960175	35969736
Tubb5	ENSMUSG00000001525	17	35970871	35975251
Mdc1	ENSMUSG00000061607	17	35978460	35996615
Nrm	ENSMUSG00000059791	17	35998263	36002347
Ppp1r18	ENSMUSG00000034595	17	36002538	36012541
Dhx16	ENSMUSG00000024422	17	36016764	36029615
2310061I04Rik	ENSMUSG00000050705	17	36029622	36034376
Atat1	ENSMUSG00000024426	17	36034540	36047020
Mrps18b	ENSMUSG00000024436	17	36047324	36053334
Ppp1r10	ENSMUSG00000039220	17	36053379	36069226
Abcf1	ENSMUSG00000038762	17	36093764	36106706
Prr3	ENSMUSG00000038500	17	36109486	36117181
Gnl1	ENSMUSG00000024429	17	36116796	36126407
Gm20508	ENSMUSG00000092604	17	36128812	36130683
H2-T24	ENSMUSG00000053835	17	36142640	36157505
Gm17579	ENSMUSG00000092126	17	36150382	36156101
H2-T23	ENSMUSG00000067212	17	36166718	36169800
H2-T22	ENSMUSG00000056116	17	36174073	36179692
Gm6034	ENSMUSG00000073407	17	36179906	36195590
Gm11127	ENSMUSG00000079492	17	36192761	36195316
H2-Bl	ENSMUSG00000073406	17	36201920	36221168
H2-T10	ENSMUSG00000079491	17	36252821	36258410
Gm19684	ENSMUSG00000092277	17	36258623	36266637
Gm7030	ENSMUSG00000092243	17	36264424	36266370
2410017I17Rik	ENSMUSG00000038311	17	36281963	36299518
Gm8909	ENSMUSG00000073402	17	36301388	36305482
Gm8909	ENSMUSG00000092478	17	36301389	36305482
H2-T3	ENSMUSG00000054128	17	36322517	36327232
Rpp21	ENSMUSG00000024446	17	36392590	36395014
Trim39	ENSMUSG00000045409	17	36395818	36409192
H2-M10.2	ENSMUSG00000023083	17	36421172	36423435
H2-M10.1	ENSMUSG00000024448	17	36459803	36463100
H2-M10.3	ENSMUSG00000058124	17	36501949	36505362
H2-M10.4	ENSMUSG00000048231	17	36595862	36599279
H2-M11	ENSMUSG00000037537	17	36684020	36686195
H2-M9	ENSMUSG00000067201	17	36776230	36779611
H2-M1	ENSMUSG00000037334	17	36806953	36809164
H2-M10.5	ENSMUSG00000037246	17	36909855	36913179
H2-M10.6	ENSMUSG00000037130	17	36949116	36952509
Trim26	ENSMUSG00000024457	17	36974079	36996343
Trim15	ENSMUSG00000050747	17	36997638	37004155
Trim10	ENSMUSG00000073400	17	37006519	37014770
Trim40	ENSMUSG00000073399	17	37018543	37027068
Gm4256	ENSMUSG00000092508	17	36544384	36546494
Gm8752	ENSMUSG00000092278	17	35582801	35585871
Gm18734	ENSMUSG00000092438	17	35441151	35443262
Gm8741	ENSMUSG00000091655	17	35472854	35473240
H2-Q3	ENSMUSG00000092253	17	35495934	35496917
Gm11131	ENSMUSG00000079505	17	35513966	35517237
H2-Q5	ENSMUSG00000055413	17	35531071	35534971
1110038B12Rik	ENSMUSG00000092203	17	35087183	35089416
Gm9612	ENSMUSG00000092231	17	36572848	36573215
Gm5227	ENSMUSG00000092437	17	36581122	36581694
Gm4830	ENSMUSG00000044538	17	36589239	36590198
Gm20452	ENSMUSG00000092290	17	36637305	36638526
Gm20451	ENSMUSG00000092493	17	36644125	36645897
Gm20454	ENSMUSG00000092296	17	36671226	36671446
Gm20453	ENSMUSG00000092414	17	36682833	36683058
Gm8868	ENSMUSG00000092332	17	36695566	36698613
Gm20450	ENSMUSG00000092606	17	36734843	36734989
Rpl9-ps5	ENSMUSG00000092485	17	36794001	36794571
Gm8877	ENSMUSG00000092298	17	36838574	36840154
Gm20549	ENSMUSG00000092377	17	36840720	36841148
Gm20523	ENSMUSG00000092172	17	36842669	36843792
Gm20525	ENSMUSG00000092343	17	36860179	36860226
Gm20526	ENSMUSG00000092435	17	36860893	36861220
[truncated: 538 more rows]

## Sheet: Venn
								589 common elements in "DT" and "Prn":				42 common elements in "DT", "FHA" and "Prn":				239 common elements in "DT", "PT" and "Prn":					30 common elements in "DT", "PT" and "FHA":
								ENSMUSG00000090323				ENSMUSG00000079164				ENSMUSG00000005493					ENSMUSG00000038733
								ENSMUSG00000035131				ENSMUSG00000091555				ENSMUSG00000038975					ENSMUSG00000054135
								ENSMUSG00000080078				ENSMUSG00000085412				ENSMUSG00000062908					ENSMUSG00000026514
								ENSMUSG00000087627				ENSMUSG00000081979				ENSMUSG00000088764					ENSMUSG00000050625
								ENSMUSG00000085822				ENSMUSG00000082781				ENSMUSG00000065463					ENSMUSG00000081214
								ENSMUSG00000053988				ENSMUSG00000087658				ENSMUSG00000064731					ENSMUSG00000089888
								ENSMUSG00000026667				ENSMUSG00000056445				ENSMUSG00000093463					ENSMUSG00000089927
								ENSMUSG00000044306				ENSMUSG00000087626				ENSMUSG00000065738					ENSMUSG00000047369
								ENSMUSG00000073494				ENSMUSG00000085696				ENSMUSG00000028360					ENSMUSG00000004880
								ENSMUSG00000026673				ENSMUSG00000092475				ENSMUSG00000056608					ENSMUSG00000064970
								ENSMUSG00000079188				ENSMUSG00000056583				ENSMUSG00000074171					ENSMUSG00000056699
								ENSMUSG00000038473				ENSMUSG00000086427				ENSMUSG00000031666					ENSMUSG00000022995
								ENSMUSG00000042800				ENSMUSG00000055408				ENSMUSG00000031667					ENSMUSG00000089429
								ENSMUSG00000038463				ENSMUSG00000086126				ENSMUSG00000033282					ENSMUSG00000026511
								ENSMUSG00000026663				ENSMUSG00000059159				ENSMUSG00000055932					ENSMUSG00000091013
								ENSMUSG00000026659				ENSMUSG00000084282				ENSMUSG00000089179					ENSMUSG00000038633
								ENSMUSG00000070524				ENSMUSG00000004980				ENSMUSG00000089148					ENSMUSG00000047539
								ENSMUSG00000038421				ENSMUSG00000029836				ENSMUSG00000031734					ENSMUSG00000086539
								ENSMUSG00000026656				ENSMUSG00000038301				ENSMUSG00000090778					ENSMUSG00000091866
								ENSMUSG00000059089				ENSMUSG00000059182				ENSMUSG00000046413					ENSMUSG00000032405
								ENSMUSG00000059498				ENSMUSG00000029844				ENSMUSG00000065636					ENSMUSG00000022245
								ENSMUSG00000026649				ENSMUSG00000014704				ENSMUSG00000031736					ENSMUSG00000058444
								ENSMUSG00000058076				ENSMUSG00000093412				ENSMUSG00000031737					ENSMUSG00000032403
								ENSMUSG00000056569				ENSMUSG00000079560				ENSMUSG00000031787					ENSMUSG00000037801
								ENSMUSG00000038370				ENSMUSG00000056468				ENSMUSG00000031788					ENSMUSG00000064559
								ENSMUSG00000005677				ENSMUSG00000000942				ENSMUSG00000031789					ENSMUSG00000093137
								ENSMUSG00000005674				ENSMUSG00000059723				ENSMUSG00000058253					ENSMUSG00000064855
								ENSMUSG00000005681				ENSMUSG00000038253				ENSMUSG00000090206					ENSMUSG00000060534
								ENSMUSG00000058715				ENSMUSG00000043219				ENSMUSG00000074140					ENSMUSG00000024640
								ENSMUSG00000013593				ENSMUSG00000038236				ENSMUSG00000046556					ENSMUSG00000065323
								ENSMUSG00000006403				ENSMUSG00000038227				ENSMUSG00000031792
								ENSMUSG00000052423				ENSMUSG00000000938				ENSMUSG00000031790
								ENSMUSG00000062729				ENSMUSG00000038210				ENSMUSG00000031796
								ENSMUSG00000053483				ENSMUSG00000038203				ENSMUSG00000046707
								ENSMUSG00000062963				ENSMUSG00000005503				ENSMUSG00000036598
								ENSMUSG00000079137				ENSMUSG00000029776				ENSMUSG00000048400
								ENSMUSG00000013973				ENSMUSG00000029832				ENSMUSG00000031669
								ENSMUSG00000013997				ENSMUSG00000004535				ENSMUSG00000036564
								ENSMUSG00000006412				ENSMUSG00000063568				ENSMUSG00000031671
								ENSMUSG00000045259				ENSMUSG00000064792				ENSMUSG00000036550
								ENSMUSG00000006411				ENSMUSG00000092936				ENSMUSG00000061104
								ENSMUSG00000048865				ENSMUSG00000065443				ENSMUSG00000036534
								ENSMUSG00000026641								ENSMUSG00000031672
								ENSMUSG00000091166								ENSMUSG00000081436
								ENSMUSG00000038235								ENSMUSG00000074136
								ENSMUSG00000091993								ENSMUSG00000065089
								ENSMUSG00000060244								ENSMUSG00000065211
								ENSMUSG00000038218								ENSMUSG00000093084
								ENSMUSG00000038209								ENSMUSG00000077272
								ENSMUSG00000004709								ENSMUSG00000053206
								ENSMUSG00000004707								ENSMUSG00000079884
								ENSMUSG00000038179								ENSMUSG00000041444
								ENSMUSG00000015355								ENSMUSG00000032034
								ENSMUSG00000015316								ENSMUSG00000041248
								ENSMUSG00000038147								ENSMUSG00000016087
								ENSMUSG00000073492								ENSMUSG00000032035
								ENSMUSG00000015314								ENSMUSG00000064492
								ENSMUSG00000026556								ENSMUSG00000088905
								ENSMUSG00000051251								ENSMUSG00000072849
								ENSMUSG00000003458								ENSMUSG00000063232
								ENSMUSG00000026553								ENSMUSG00000058260
								ENSMUSG00000053925								ENSMUSG00000041567
								ENSMUSG00000089838								ENSMUSG00000041550
								ENSMUSG00000059058								ENSMUSG00000041536
								ENSMUSG00000092117								ENSMUSG00000066364
								ENSMUSG00000064448								ENSMUSG00000066361
								ENSMUSG00000065033								ENSMUSG00000066363
								ENSMUSG00000065390								ENSMUSG00000041481
								ENSMUSG00000087747								ENSMUSG00000079014
								ENSMUSG00000064611								ENSMUSG00000093753
								ENSMUSG00000088291								ENSMUSG00000092075
								ENSMUSG00000065905								ENSMUSG00000091573
								ENSMUSG00000003464								ENSMUSG00000091553
								ENSMUSG00000026554								ENSMUSG00000041449
								ENSMUSG00000089803								ENSMUSG00000093356
								ENSMUSG00000013698								ENSMUSG00000022973
								ENSMUSG00000007122								ENSMUSG00000022974
								ENSMUSG00000007107								ENSMUSG00000039851
								ENSMUSG00000038034								ENSMUSG00000052471
								ENSMUSG00000007097								ENSMUSG00000039830
								ENSMUSG00000038026								ENSMUSG00000046160
								ENSMUSG00000044708								ENSMUSG00000022971
								ENSMUSG00000092085								ENSMUSG00000093701
								ENSMUSG00000050229								ENSMUSG00000022969
								ENSMUSG00000026548								ENSMUSG00000022967
								ENSMUSG00000037995								ENSMUSG00000022965
								ENSMUSG00000026547								ENSMUSG00000087354
								ENSMUSG00000026546								ENSMUSG00000085398
								ENSMUSG00000049598								ENSMUSG00000081176
								ENSMUSG00000053318								ENSMUSG00000085865
								ENSMUSG00000070504								ENSMUSG00000084866
								ENSMUSG00000085184								ENSMUSG00000084301
								ENSMUSG00000026544								ENSMUSG00000082535
								ENSMUSG00000037942								ENSMUSG00000065811
								ENSMUSG00000026542								ENSMUSG00000022964
								ENSMUSG00000037924								ENSMUSG00000085337
								ENSMUSG00000088813								ENSMUSG00000039763
								ENSMUSG00000077252								ENSMUSG00000022962
								ENSMUSG00000070182								ENSMUSG00000022961
								ENSMUSG00000062527								ENSMUSG00000022960
								ENSMUSG00000058981								ENSMUSG00000022956
								ENSMUSG00000046643								ENSMUSG00000058240
								ENSMUSG00000049456								ENSMUSG00000085169
								ENSMUSG00000066680								ENSMUSG00000022957
								ENSMUSG00000005339								ENSMUSG00000064623
								ENSMUSG00000049605								ENSMUSG00000087240
								ENSMUSG00000079180								ENSMUSG00000087190
								ENSMUSG00000037872								ENSMUSG00000089293
								ENSMUSG00000005338								ENSMUSG00000039680
								ENSMUSG00000037860								ENSMUSG00000089774
								ENSMUSG00000037849								ENSMUSG00000079514
								ENSMUSG00000070501								ENSMUSG00000086331
								ENSMUSG00000073491								ENSMUSG00000039672
								ENSMUSG00000043263								ENSMUSG00000051989
								ENSMUSG00000066677								ENSMUSG00000051728
								ENSMUSG00000073490								ENSMUSG00000039639
								ENSMUSG00000073489								ENSMUSG00000022951
								ENSMUSG00000090222								ENSMUSG00000051297
								ENSMUSG00000090272								ENSMUSG00000022949
								ENSMUSG00000026536								ENSMUSG00000085637
								ENSMUSG00000039997								ENSMUSG00000022952
								ENSMUSG00000026535								ENSMUSG00000086934
								ENSMUSG00000054203								ENSMUSG00000024855
								ENSMUSG00000045381								ENSMUSG00000024853
								ENSMUSG00000047048								ENSMUSG00000051133
								ENSMUSG00000050134								ENSMUSG00000047658
								ENSMUSG00000049528								ENSMUSG00000038498
								ENSMUSG00000059371								ENSMUSG00000024846
								ENSMUSG00000046486								ENSMUSG00000024844
								ENSMUSG00000051528								ENSMUSG00000024841
								ENSMUSG00000091950								ENSMUSG00000039148
								ENSMUSG00000055033								ENSMUSG00000039330
								ENSMUSG00000026532								ENSMUSG00000086938
								ENSMUSG00000050788								ENSMUSG00000024914
								ENSMUSG00000026531								ENSMUSG00000047423
								ENSMUSG00000066672								ENSMUSG00000024912
								ENSMUSG00000059503								ENSMUSG00000042878
								ENSMUSG00000051509								ENSMUSG00000024911
								ENSMUSG00000066671								ENSMUSG00000024910
								ENSMUSG00000028354								ENSMUSG00000024909
								ENSMUSG00000050069								ENSMUSG00000024906
								ENSMUSG00000026527								ENSMUSG00000088909
								ENSMUSG00000026526								ENSMUSG00000056201
								ENSMUSG00000039783								ENSMUSG00000056185
								ENSMUSG00000026525								ENSMUSG00000024922
								ENSMUSG00000078185								ENSMUSG00000049562
								ENSMUSG00000026523								ENSMUSG00000024925
								ENSMUSG00000039748								ENSMUSG00000024926
								ENSMUSG00000055214								ENSMUSG00000024927
								ENSMUSG00000078184								ENSMUSG00000056917
								ENSMUSG00000065666								ENSMUSG00000054874
								ENSMUSG00000077794								ENSMUSG00000004054
								ENSMUSG00000090533								ENSMUSG00000024936
								ENSMUSG00000039384								ENSMUSG00000024937
								ENSMUSG00000044854								ENSMUSG00000089766
								ENSMUSG00000059483								ENSMUSG00000024939
								ENSMUSG00000089057								ENSMUSG00000079478
								ENSMUSG00000039377								ENSMUSG00000092341
								ENSMUSG00000026621								ENSMUSG00000092267
								ENSMUSG00000073481								ENSMUSG00000092274
								ENSMUSG00000039349								ENSMUSG00000024940
								ENSMUSG00000026620								ENSMUSG00000024941
								ENSMUSG00000092578								ENSMUSG00000043488
								ENSMUSG00000088562								ENSMUSG00000044390
								ENSMUSG00000088559								ENSMUSG00000024826
								ENSMUSG00000081093								ENSMUSG00000024816
								ENSMUSG00000085677								ENSMUSG00000045664
								ENSMUSG00000063001								ENSMUSG00000024818
								ENSMUSG00000087457								ENSMUSG00000092319
								ENSMUSG00000086181								ENSMUSG00000083458
								ENSMUSG00000050533								ENSMUSG00000007338
								ENSMUSG00000037211								ENSMUSG00000038274
								ENSMUSG00000064315								ENSMUSG00000075227
								ENSMUSG00000044864								ENSMUSG00000024799
								ENSMUSG00000046743								ENSMUSG00000024797
								ENSMUSG00000058174								ENSMUSG00000024792
								ENSMUSG00000027722								ENSMUSG00000047733
								ENSMUSG00000092986								ENSMUSG00000024791
								ENSMUSG00000077728								ENSMUSG00000079472
								ENSMUSG00000089123								ENSMUSG00000054999
								ENSMUSG00000076385								ENSMUSG00000024790
								ENSMUSG00000046561								ENSMUSG00000024787
								ENSMUSG00000053819								ENSMUSG00000024944
								ENSMUSG00000032826								ENSMUSG00000039699
								ENSMUSG00000078164								ENSMUSG00000024786
								ENSMUSG00000027968								ENSMUSG00000024807
								ENSMUSG00000051278								ENSMUSG00000090542
								ENSMUSG00000027967								ENSMUSG00000024833
								ENSMUSG00000028028								ENSMUSG00000037451
								ENSMUSG00000046688								ENSMUSG00000024942
								ENSMUSG00000074238								ENSMUSG00000084742
								ENSMUSG00000050549								ENSMUSG00000085196
								ENSMUSG00000074237								ENSMUSG00000079467
								ENSMUSG00000090427								ENSMUSG00000084876
								ENSMUSG00000086679								ENSMUSG00000024949
								ENSMUSG00000089988								ENSMUSG00000024784
								ENSMUSG00000087227								ENSMUSG00000024777
								ENSMUSG00000077617								ENSMUSG00000032648
								ENSMUSG00000065447								ENSMUSG00000032946
								ENSMUSG00000065552								ENSMUSG00000033768
								ENSMUSG00000065413								ENSMUSG00000024773
								ENSMUSG00000065482								ENSMUSG00000024772
								ENSMUSG00000088537								ENSMUSG00000024769
								ENSMUSG00000076252								ENSMUSG00000024947
								ENSMUSG00000039131								ENSMUSG00000024948
								ENSMUSG00000028035								ENSMUSG00000087828
								ENSMUSG00000028034								ENSMUSG00000065523
								ENSMUSG00000039103								ENSMUSG00000065582
								ENSMUSG00000054942								ENSMUSG00000080414
								ENSMUSG00000025437								ENSMUSG00000052188
								ENSMUSG00000039068								ENSMUSG00000085694
								ENSMUSG00000039058								ENSMUSG00000061742
								ENSMUSG00000084343								ENSMUSG00000092802
								ENSMUSG00000039047								ENSMUSG00000084221
								ENSMUSG00000039037								ENSMUSG00000084825
								ENSMUSG00000090095								ENSMUSG00000085285
								ENSMUSG00000090040								ENSMUSG00000024952
								ENSMUSG00000090017								ENSMUSG00000047810
								ENSMUSG00000085901								ENSMUSG00000050623
								ENSMUSG00000090163								ENSMUSG00000024957
								ENSMUSG00000052544								ENSMUSG00000024958
								ENSMUSG00000089376								ENSMUSG00000024959
								ENSMUSG00000062046								ENSMUSG00000024960
								ENSMUSG00000038997								ENSMUSG00000056612
								ENSMUSG00000058508								ENSMUSG00000056629
								ENSMUSG00000086438								ENSMUSG00000024962
								ENSMUSG00000089237								ENSMUSG00000024963
								ENSMUSG00000077174								ENSMUSG00000037349
								ENSMUSG00000028347								ENSMUSG00000047656
								ENSMUSG00000028348								ENSMUSG00000024965
								ENSMUSG00000063446								ENSMUSG00000024966
								ENSMUSG00000060317								ENSMUSG00000036278
								ENSMUSG00000070985								ENSMUSG00000047787
								ENSMUSG00000039653								ENSMUSG00000024953
								ENSMUSG00000044018								ENSMUSG00000038812
								ENSMUSG00000039634								ENSMUSG00000024955
								ENSMUSG00000028307								ENSMUSG00000024767
								ENSMUSG00000039611								ENSMUSG00000035885
								ENSMUSG00000028309								ENSMUSG00000024764
								ENSMUSG00000039579
								ENSMUSG00000028310
								ENSMUSG00000080850
								ENSMUSG00000083091
								ENSMUSG00000082384
								ENSMUSG00000084787
								ENSMUSG00000083869
								ENSMUSG00000081902
								ENSMUSG00000081770
								ENSMUSG00000082725
								ENSMUSG00000081380
								ENSMUSG00000083153
								ENSMUSG00000081120
								ENSMUSG00000093240
								ENSMUSG00000077308
								ENSMUSG00000077417
								ENSMUSG00000064782
								ENSMUSG00000084479
								ENSMUSG00000039555
								ENSMUSG00000084116
								ENSMUSG00000019836
								ENSMUSG00000091678
								ENSMUSG00000066136
								ENSMUSG00000073819
								ENSMUSG00000073818
								ENSMUSG00000073817
								ENSMUSG00000070946
								ENSMUSG00000043003
								ENSMUSG00000078663
								ENSMUSG00000078662
								ENSMUSG00000078661
								ENSMUSG00000078660
								ENSMUSG00000028396
								ENSMUSG00000049122
								ENSMUSG00000028397
								ENSMUSG00000085034
								ENSMUSG00000083530
								ENSMUSG00000081048
								ENSMUSG00000083767
								ENSMUSG00000085482
								ENSMUSG00000081438
								ENSMUSG00000083659
								ENSMUSG00000082533
								ENSMUSG00000084311
								ENSMUSG00000081067
								ENSMUSG00000077496
								ENSMUSG00000073686
								ENSMUSG00000029047
								ENSMUSG00000029048
								ENSMUSG00000029049
								ENSMUSG00000029050
								ENSMUSG00000073684
								ENSMUSG00000029053
								ENSMUSG00000029054
								ENSMUSG00000042233
								ENSMUSG00000078490
								ENSMUSG00000023153
								ENSMUSG00000029064
								ENSMUSG00000029056
								ENSMUSG00000029055
								ENSMUSG00000084803
								ENSMUSG00000082429
								ENSMUSG00000029212
								ENSMUSG00000029213
								ENSMUSG00000005220
								ENSMUSG00000072889
								ENSMUSG00000063935
								ENSMUSG00000060204
								ENSMUSG00000067220
								ENSMUSG00000067219
								ENSMUSG00000054892
								ENSMUSG00000029217
								ENSMUSG00000036087
								ENSMUSG00000063656
								ENSMUSG00000029219
								ENSMUSG00000070733
								ENSMUSG00000090491
								ENSMUSG00000029152
								ENSMUSG00000029153
								ENSMUSG00000029154
								ENSMUSG00000051674
								ENSMUSG00000067206
								ENSMUSG00000029156
								ENSMUSG00000029155
								ENSMUSG00000080736
								ENSMUSG00000082705
								ENSMUSG00000046808
								ENSMUSG00000093400
								ENSMUSG00000093644
								ENSMUSG00000093771
								ENSMUSG00000052154
								ENSMUSG00000081849
								ENSMUSG00000086376
								ENSMUSG00000090561
								ENSMUSG00000082039
								ENSMUSG00000088268
								ENSMUSG00000089195
								ENSMUSG00000065000
								ENSMUSG00000054814
								ENSMUSG00000049907
								ENSMUSG00000062110
								ENSMUSG00000029227
								ENSMUSG00000029228
								ENSMUSG00000087250
								ENSMUSG00000086234
								ENSMUSG00000053656
								ENSMUSG00000080700
								ENSMUSG00000084132
								ENSMUSG00000093355
								ENSMUSG00000029330
								ENSMUSG00000043940
								ENSMUSG00000057315
								ENSMUSG00000046709
								ENSMUSG00000034573
								ENSMUSG00000029321
								ENSMUSG00000029320
								ENSMUSG00000092354
								ENSMUSG00000084126
								ENSMUSG00000088121
								ENSMUSG00000088474
								ENSMUSG00000029313
								ENSMUSG00000081872
								ENSMUSG00000080759
								ENSMUSG00000089209
								ENSMUSG00000087670
								ENSMUSG00000080205
								ENSMUSG00000090982
								ENSMUSG00000053007
								ENSMUSG00000043496
								ENSMUSG00000078169
								ENSMUSG00000052955
								ENSMUSG00000004633
								ENSMUSG00000065216
								ENSMUSG00000077773
								ENSMUSG00000086946
								ENSMUSG00000073067
								ENSMUSG00000063830
								ENSMUSG00000008789
								ENSMUSG00000023185
								ENSMUSG00000078793
								ENSMUSG00000030368
								ENSMUSG00000057195
								ENSMUSG00000030366
								ENSMUSG00000066756
								ENSMUSG00000054005
								ENSMUSG00000003505
								ENSMUSG00000030373
								ENSMUSG00000070799
								ENSMUSG00000070798
								ENSMUSG00000070797
								ENSMUSG00000074359
								ENSMUSG00000070796
								ENSMUSG00000076355
								ENSMUSG00000093207
								ENSMUSG00000065313
								ENSMUSG00000076332
								ENSMUSG00000089483
								ENSMUSG00000025789
								ENSMUSG00000085161
								ENSMUSG00000025790
								ENSMUSG00000089573
								ENSMUSG00000089522
								ENSMUSG00000053025
								ENSMUSG00000088683
								ENSMUSG00000086403
								ENSMUSG00000066406
								ENSMUSG00000055652
								ENSMUSG00000076961
								ENSMUSG00000087896
								ENSMUSG00000043668
								ENSMUSG00000064758
								ENSMUSG00000088883
								ENSMUSG00000077938
								ENSMUSG00000004637
								ENSMUSG00000055435
								ENSMUSG00000086717
								ENSMUSG00000065090
								ENSMUSG00000088428
								ENSMUSG00000085964
								ENSMUSG00000050930
								ENSMUSG00000031851
								ENSMUSG00000060212
								ENSMUSG00000031853
								ENSMUSG00000033998
								ENSMUSG00000057060
								ENSMUSG00000051671
								ENSMUSG00000090290
								ENSMUSG00000051495
								ENSMUSG00000058779
								ENSMUSG00000033931
								ENSMUSG00000025812
								ENSMUSG00000074026
								ENSMUSG00000065637
								ENSMUSG00000092968
								ENSMUSG00000093196
								ENSMUSG00000088710
								ENSMUSG00000090074
								ENSMUSG00000088580
								ENSMUSG00000091977
								ENSMUSG00000025810
								ENSMUSG00000084523
								ENSMUSG00000025809
								ENSMUSG00000075864
								ENSMUSG00000087870
								ENSMUSG00000025808
								ENSMUSG00000077538
								ENSMUSG00000056018
								ENSMUSG00000078840
								ENSMUSG00000077771
								ENSMUSG00000091639
								ENSMUSG00000032033
								ENSMUSG00000093088
								ENSMUSG00000021044
								ENSMUSG00000066392
								ENSMUSG00000092733
								ENSMUSG00000077853
								ENSMUSG00000080680
								ENSMUSG00000092040
								ENSMUSG00000087143
								ENSMUSG00000086982
								ENSMUSG00000021596
								ENSMUSG00000021597
								ENSMUSG00000071252
								ENSMUSG00000064138
								ENSMUSG00000093668
								ENSMUSG00000069171
								ENSMUSG00000088521
								ENSMUSG00000033004
								ENSMUSG00000022262
								ENSMUSG00000092639
								ENSMUSG00000038148
								ENSMUSG00000091972
								ENSMUSG00000022514
								ENSMUSG00000068428
								ENSMUSG00000052276
								ENSMUSG00000056423
								ENSMUSG00000038127
								ENSMUSG00000022523
								ENSMUSG00000092545
								ENSMUSG00000089705
								ENSMUSG00000088476
								ENSMUSG00000002489
								ENSMUSG00000092779
								ENSMUSG00000022982
								ENSMUSG00000022983
								ENSMUSG00000053414
								ENSMUSG00000046119
								ENSMUSG00000064471
								ENSMUSG00000022978
								ENSMUSG00000091946
								ENSMUSG00000039956
								ENSMUSG00000039929
								ENSMUSG00000039903
								ENSMUSG00000022972
								ENSMUSG00000083226
								ENSMUSG00000085279
								ENSMUSG00000093256
								ENSMUSG00000022948
								ENSMUSG00000051483
								ENSMUSG00000022947
								ENSMUSG00000022946
								ENSMUSG00000039456
								ENSMUSG00000022945
								ENSMUSG00000047109
								ENSMUSG00000062713
								ENSMUSG00000040820
								ENSMUSG00000022941
								ENSMUSG00000022940
								ENSMUSG00000040785
								ENSMUSG00000091302
								ENSMUSG00000082815
								ENSMUSG00000041929
								ENSMUSG00000089814
								ENSMUSG00000084591
								ENSMUSG00000076457
								ENSMUSG00000076304
								ENSMUSG00000074892
								ENSMUSG00000000159
								ENSMUSG00000000157
								ENSMUSG00000090223
								ENSMUSG00000050272
								ENSMUSG00000040605
								ENSMUSG00000000386
								ENSMUSG00000022938
								ENSMUSG00000023341
								ENSMUSG00000000385
								ENSMUSG00000005251
								ENSMUSG00000014039
								ENSMUSG00000045975
								ENSMUSG00000046962
								ENSMUSG00000080717
								ENSMUSG00000091751
								ENSMUSG00000059132
								ENSMUSG00000088269
								ENSMUSG00000024386
								ENSMUSG00000024383
								ENSMUSG00000024382
								ENSMUSG00000024381
								ENSMUSG00000090523
								ENSMUSG00000024380
								ENSMUSG00000024379
								ENSMUSG00000038299
								ENSMUSG00000038128
								ENSMUSG00000024378
								ENSMUSG00000042834
								ENSMUSG00000073610
								ENSMUSG00000090784
								ENSMUSG00000085670
								ENSMUSG00000085056
								ENSMUSG00000087447
								ENSMUSG00000089529
								ENSMUSG00000088077
								ENSMUSG00000093130
								ENSMUSG00000087715
								ENSMUSG00000024456
								ENSMUSG00000024454
								ENSMUSG00000044024
								ENSMUSG00000038524
								ENSMUSG00000024451
								ENSMUSG00000051375
								ENSMUSG00000066475
								ENSMUSG00000024442
								ENSMUSG00000024440
								ENSMUSG00000060450
								ENSMUSG00000052102
								ENSMUSG00000086988
								ENSMUSG00000089983
								ENSMUSG00000093175
								ENSMUSG00000089296
								ENSMUSG00000046388
								ENSMUSG00000024712
								ENSMUSG00000039126
								ENSMUSG00000024697
								ENSMUSG00000046230
								ENSMUSG00000038843
								ENSMUSG00000024713
								ENSMUSG00000056829
								ENSMUSG00000089540
								ENSMUSG00000076305
								ENSMUSG00000088370
								ENSMUSG00000076303
								ENSMUSG00000080783
								ENSMUSG00000024725
								ENSMUSG00000037847
								ENSMUSG00000024726
								ENSMUSG00000047044
								ENSMUSG00000024727
								ENSMUSG00000064941
								ENSMUSG00000088601
								ENSMUSG00000036192
