# Supplementary material for: Genetic Variation in the Magnitude and Longevity of the IgG Subclass Response to a Diphtheria-Tetanus-Acellular Pertussis (DTaP) Vaccine in Mice
Source: Vaccines (Basel). 2019 Sep 20;7(4):124. doi: 10.3390/vaccines7040124 (PMC6963843; doi:10.3390/vaccines7040124)
Supplement: Supplementary file 1 [file vaccines-07-00124-s001.zip › Supplemental Data/wk14IgG2b_genelist.xlsx]

## Sheet: wk14IgG2b_genelist
Gene Name	Ensembl Gene ID	Chromosome	Start	End
Sulf1	ENSMUSG00000016918	1	12708626	12850452
Slco5a1	ENSMUSG00000025938	1	12856630	12981258
Prdm14	ENSMUSG00000042414	1	13103538	13117244
Ncoa2	ENSMUSG00000005886	1	13129186	13364164
Tram1	ENSMUSG00000025935	1	13554783	13579945
Lactb2	ENSMUSG00000025937	1	13614926	13650627
Xkr9	ENSMUSG00000067813	1	13658852	13691804
Eya1	ENSMUSG00000025932	1	14159035	14300281
Gm17644	ENSMUSG00000066918	1	12657644	12663171
7SK	ENSMUSG00000089358	1	13922459	13922766
U6	ENSMUSG00000087782	1	13324579	13324690
SNORA17	ENSMUSG00000077368	1	13764415	13764545
U6	ENSMUSG00000064969	1	12365017	12365123
AC156988.1	ENSMUSG00000093057	1	14172659	14172758
Gm597	ENSMUSG00000048411	1	28832989	28837097
Gm17684	ENSMUSG00000090766	1	28912033	28912718
Gm7846	ENSMUSG00000086240	1	28637343	28637618
Gm5697	ENSMUSG00000081557	1	28857083	28859566
Gm6462	ENSMUSG00000058590	1	28994880	28995185
AC130205.1	ENSMUSG00000093777	1	29341452	29341520
Y_RNA	ENSMUSG00000064433	1	29337809	29337920
AC163659.1	ENSMUSG00000080391	1	29418120	29418215
AC163659.2	ENSMUSG00000080625	1	29358325	29358424
Khdrbs2	ENSMUSG00000026058	1	32229651	32714583
Gm9839	ENSMUSG00000049830	1	32576408	32577844
Gm5415	ENSMUSG00000091318	1	32600391	32604138
Prim2	ENSMUSG00000026134	1	33510656	33726631
1700001G17Rik	ENSMUSG00000044744	1	33726688	33727557
Gm7910	ENSMUSG00000082159	1	31792901	31793737
U6	ENSMUSG00000065223	1	33350521	33350620
U7	ENSMUSG00000089489	1	32625204	32625266
U6	ENSMUSG00000064688	1	32269978	32270084
U6	ENSMUSG00000065260	1	33479578	33479683
7SK	ENSMUSG00000089395	1	32783484	32783775
U6	ENSMUSG00000088750	1	33248838	33248947
Hs6st1	ENSMUSG00000045216	1	36125245	36163291
Uggt1	ENSMUSG00000037470	1	36198375	36301150
Neurl3	ENSMUSG00000047180	1	36321447	36330270
Arid5a	ENSMUSG00000037447	1	36364578	36380874
4632411B12Rik	ENSMUSG00000010453	1	36392575	36426026
Lman2l	ENSMUSG00000001143	1	36478910	36502116
Cnnm4	ENSMUSG00000037408	1	36528442	36565621
Cnnm3	ENSMUSG00000001138	1	36568712	36585082
Ankrd23	ENSMUSG00000067653	1	36587379	36592584
Ankrd39	ENSMUSG00000079610	1	36595018	36604046
Sema4c	ENSMUSG00000026121	1	36605487	36615194
Fam178b	ENSMUSG00000046337	1	36619539	36740028
Cox5b	ENSMUSG00000061518	1	36748332	36750230
Actr1b	ENSMUSG00000037351	1	36756047	36771267
Zap70	ENSMUSG00000026117	1	36818695	36839663
Tmem131	ENSMUSG00000026116	1	36849036	36996372
Rpl12-ps1	ENSMUSG00000080054	1	37014738	37015362
Vwa3b	ENSMUSG00000050122	1	37083441	37133841
Vwa3b	ENSMUSG00000026115	1	37210689	37244450
Cnga3	ENSMUSG00000026114	1	37275181	37320229
Inpp4a	ENSMUSG00000026113	1	37356710	37467581
6330578E17Rik	ENSMUSG00000026112	1	37473929	37486948
Unc50	ENSMUSG00000026111	1	37487015	37495969
Mgat4a	ENSMUSG00000026110	1	37496185	37597861
2010300C02Rik	ENSMUSG00000026090	1	37668522	37776930
Tsga10	ENSMUSG00000060771	1	37811417	37922143
Lipt1	ENSMUSG00000037216	1	37928583	37934232
Mitd1	ENSMUSG00000026088	1	37931646	37947256
Mrpl30	ENSMUSG00000026087	1	37947322	37955380
Fer1l5	ENSMUSG00000037432	1	36473733	36478955
D430040D24Rik	ENSMUSG00000087589	1	36615204	36622458
Gm6428	ENSMUSG00000089906	1	36658647	36658991
4930439A04Rik	ENSMUSG00000086064	1	37386512	37391017
4930594C11Rik	ENSMUSG00000087233	1	37544038	37545827
4930556I23Rik	ENSMUSG00000089767	1	37671104	37672217
Gm17715	ENSMUSG00000092106	1	37922144	37928233
n-R5s210	ENSMUSG00000070201	1	37062284	37062402
AC084389.1	ENSMUSG00000077939	1	36720810	36720884
Lyg2	ENSMUSG00000061584	1	37962766	37973338
Lyg1	ENSMUSG00000026085	1	38003581	38014604
Gm15457	ENSMUSG00000087374	1	37990441	38010981
Txndc9	ENSMUSG00000058407	1	38040712	38054191
Eif5b	ENSMUSG00000026083	1	38054855	38112424
7SK	ENSMUSG00000089141	1	38030812	38031048
Rev1	ENSMUSG00000026082	1	38109632	38186507
Aff3	ENSMUSG00000037138	1	38234171	38721800
Lonrf2	ENSMUSG00000048814	1	38850514	38892935
Chst10	ENSMUSG00000026080	1	38920722	38955005
Nms	ENSMUSG00000067604	1	38995994	39007123
Pdcl3	ENSMUSG00000026078	1	39044659	39054081
Npas2	ENSMUSG00000026077	1	39250576	39420079
Rpl31	ENSMUSG00000073702	1	39424696	39428753
Tbc1d8	ENSMUSG00000003134	1	39428344	39535592
D1Bwg0212e	ENSMUSG00000003135	1	39591837	39603726
Rnf149	ENSMUSG00000048234	1	39608141	39634250
Creg2	ENSMUSG00000050967	1	39675251	39708027
Rfx8	ENSMUSG00000057173	1	39722151	39777842
Gm16150	ENSMUSG00000085391	1	38292265	38303511
Gm16151	ENSMUSG00000085280	1	38364747	38368775
Gm16152	ENSMUSG00000087131	1	38441794	38450819
Gm20428	ENSMUSG00000092553	1	39333128	39333410
Gm3617	ENSMUSG00000092563	1	39371744	39372298
Gm15832	ENSMUSG00000085894	1	39604415	39608847
D930019O06Rik	ENSMUSG00000090677	1	39707021	39714235
SNORA33	ENSMUSG00000064936	1	39630591	39630720
Snord89	ENSMUSG00000077704	1	39605590	39605699
U3	ENSMUSG00000065629	1	39576378	39576591
Gm3646	ENSMUSG00000091937	1	39861028	39861189
Map4k4	ENSMUSG00000026074	1	39957758	40083155
Gm16894	ENSMUSG00000086705	1	40133073	40142698
Il1r2	ENSMUSG00000026073	1	40141613	40182064
Il1r1	ENSMUSG00000026072	1	40281925	40373043
Il1rl2	ENSMUSG00000070942	1	40381472	40422316
Il1rl1	ENSMUSG00000026069	1	40486415	40522260
Il18r1	ENSMUSG00000026070	1	40522397	40557699
Il18rap	ENSMUSG00000026068	1	40572207	40608550
Slc9a4	ENSMUSG00000026065	1	40637072	40687576
Slc9a2	ENSMUSG00000026062	1	40738557	40825730
Mfsd9	ENSMUSG00000041945	1	40828883	40847532
Tmem182	ENSMUSG00000079588	1	40862446	40912789
snoU13	ENSMUSG00000088965	1	40666590	40666680
Gm9915	ENSMUSG00000053640	1	42286571	42287953
2610017I09Rik	ENSMUSG00000060424	1	42705007	42724517
Pou3f3	ENSMUSG00000045515	1	42753991	42757052
Mrps9	ENSMUSG00000060679	1	42908078	42962527
RP23-71K9.1	ENSMUSG00000093778	1	42749785	42751670
RP23-114H2.1	ENSMUSG00000093436	1	42751770	42797813
SNORA17	ENSMUSG00000077448	1	42923530	42923663
Gpr45	ENSMUSG00000079587	1	43009719	43011992
1700019A02Rik	ENSMUSG00000060715	1	53215421	53244461
Pms1	ENSMUSG00000026098	1	53246031	53353862
Ormdl1	ENSMUSG00000026097	1	53353939	53367153
Osgepl1	ENSMUSG00000026096	1	53370468	53383187
Asnsd1	ENSMUSG00000026095	1	53382351	53409596
Dnahc7a	ENSMUSG00000067440	1	53604023	53622541
Stk17b	ENSMUSG00000026094	1	53812350	53842068
Hecw2	ENSMUSG00000042807	1	53863726	54252012
Ccdc150	ENSMUSG00000025983	1	54307527	54425571
Gtf3c3	ENSMUSG00000041303	1	54454425	54495815
Pgap1	ENSMUSG00000073678	1	54529844	54532810
Pgap1	ENSMUSG00000070889	1	54537550	54614526
Ankrd44	ENSMUSG00000052331	1	54702184	54983231
Sf3b1	ENSMUSG00000025982	1	55042013	55084322
Coq10b	ENSMUSG00000025981	1	55109614	55129545
Hspd1	ENSMUSG00000025980	1	55134679	55145087
Hspe1	ENSMUSG00000073676	1	55144976	55148151
Mob4	ENSMUSG00000025979	1	55188075	55211743
Gm16581	ENSMUSG00000089670	1	55184141	55185131
U6	ENSMUSG00000064498	1	54305946	54306052
U1	ENSMUSG00000087949	1	53943672	53943785
AC151572.1	ENSMUSG00000089245	1	54826062	54826166
AC122925.1	ENSMUSG00000092657	1	53500115	53500239
Rftn2	ENSMUSG00000025978	1	55227003	55283626
Mars2	ENSMUSG00000046994	1	55294021	55296902
Boll	ENSMUSG00000025977	1	55305502	55420313
Plcl1	ENSMUSG00000038349	1	55463232	55808646
Gm6822	ENSMUSG00000061863	1	55217584	55217897
Gm8292	ENSMUSG00000089944	1	55392211	55392727
Gm6644	ENSMUSG00000073674	1	55500577	55501908
Gm10561	ENSMUSG00000073675	1	55283095	55292466
Ndufb3	ENSMUSG00000026032	1	58643228	58652808
Orc2	ENSMUSG00000026037	1	58519615	58561953
Fam126b	ENSMUSG00000038174	1	58579650	58643167
Carf	ENSMUSG00000026017	1	60155091	60207876
Gm15759	ENSMUSG00000089822	1	58310961	58372500
Gm15834	ENSMUSG00000085054	1	58561992	58580074
Gm15464	ENSMUSG00000082609	1	60174099	60174529
Cdk15	ENSMUSG00000026023	1	59313750	59409837
Fzd7	ENSMUSG00000041075	1	59538991	59543791
Gm973	ENSMUSG00000047361	1	59573108	59691352
Sumo1	ENSMUSG00000026021	1	59696278	59727678
Nop58	ENSMUSG00000026020	1	59741853	59768968
Bmpr2	ENSMUSG00000067336	1	59821481	59927703
Fam117b	ENSMUSG00000041040	1	59969850	60042190
Ica1l	ENSMUSG00000026018	1	60045914	60099931
Wdr12	ENSMUSG00000026019	1	60133712	60155489
Aox3	ENSMUSG00000064294	1	58169974	58257542
Als2	ENSMUSG00000026024	1	59219770	59294075
Gm10068	ENSMUSG00000059647	1	58703452	58705161
Als2cr12	ENSMUSG00000047528	1	58714961	58752833
Cflar	ENSMUSG00000026031	1	58768352	58815728
Casp8	ENSMUSG00000026029	1	58852218	58904347
Trak2	ENSMUSG00000026028	1	58957293	59030274
Stradb	ENSMUSG00000026027	1	59030366	59052559
Als2cr11	ENSMUSG00000047383	1	59053967	59060287
Gm17570	ENSMUSG00000090590	1	59060795	59062069
Als2cr11	ENSMUSG00000072295	1	59107350	59151744
Als2cr4	ENSMUSG00000038079	1	59157438	59177203
Mpp4	ENSMUSG00000079550	1	59177780	59220233
Ppil3	ENSMUSG00000026035	1	58487838	58502330
Aox4	ENSMUSG00000038242	1	58267241	58325441
Nif3l1	ENSMUSG00000026036	1	58501995	58538660
Gm17453	ENSMUSG00000092149	1	59545324	59549449
Aox3l1	ENSMUSG00000079554	1	58335170	58436108
Bzw1	ENSMUSG00000051223	1	58449980	58463392
Clk1	ENSMUSG00000026034	1	58467033	58480910
Snord70	ENSMUSG00000077345	1	59748778	59748864
Snord11	ENSMUSG00000089093	1	59761633	59761718
SNORD11	ENSMUSG00000089512	1	59761105	59761179
U6	ENSMUSG00000064701	1	58523359	58523465
SNORA17	ENSMUSG00000089275	1	58211825	58211932
SNORA17	ENSMUSG00000077616	1	59127832	59127962
7SK	ENSMUSG00000089276	1	59683424	59683508
SNORD70	ENSMUSG00000077358	1	59749353	59749436
Ndufs1	ENSMUSG00000025968	1	63190170	63223396
Fastkd2	ENSMUSG00000025962	1	63777188	63801229
4933402D24Rik	ENSMUSG00000025961	1	63801481	63815841
Klf7	ENSMUSG00000025959	1	64076021	64168856
Creb1	ENSMUSG00000025958	1	64579378	64651121
Mettl21a	ENSMUSG00000025956	1	64653047	64663816
Ccnyl1	ENSMUSG00000070871	1	64737029	64772218
Fzd5	ENSMUSG00000045005	1	64777134	64784324
Plekhm3	ENSMUSG00000051344	1	64832557	65003398
Akr1cl	ENSMUSG00000025955	1	65059263	65079333
Gm11601	ENSMUSG00000081617	1	63084788	63085155
Gm11603	ENSMUSG00000081429	1	63120348	63120593
Gm11602	ENSMUSG00000084799	1	63161045	63204864
Gm11607	ENSMUSG00000086730	1	63246887	63254188
Gm11608	ENSMUSG00000087561	1	63313422	63319694
Gm11606	ENSMUSG00000083039	1	63404008	63404624
Gm11605	ENSMUSG00000081643	1	63411294	63411939
Gm12748	ENSMUSG00000083066	1	63718042	63718545
Gm13751	ENSMUSG00000080817	1	63891401	63892152
Gm13754	ENSMUSG00000082373	1	63964422	63982506
Gm13749	ENSMUSG00000044689	1	64011301	64015573
Gm13748	ENSMUSG00000086836	1	64125228	64137356
Gm13750	ENSMUSG00000086721	1	64196775	64197239
2810408I11Rik	ENSMUSG00000087213	1	64726445	64737233
Rpl10a-ps1	ENSMUSG00000084416	1	65040498	65041205
Gm8550	ENSMUSG00000090042	1	65074654	65075306
Ino80d	ENSMUSG00000040865	1	63004992	63161241
Eef1b2	ENSMUSG00000025967	1	63223399	63227060
Gpr1	ENSMUSG00000046856	1	63229265	63261117
Zdbf2	ENSMUSG00000027520	1	63319839	63361150
Adam23	ENSMUSG00000025964	1	63492465	63643089
Dytn	ENSMUSG00000069085	1	63669425	63733501
Mdh1b	ENSMUSG00000025963	1	63745393	63776892
Gm17427	ENSMUSG00000090886	1	64076037	64079501
AC167197.1	ENSMUSG00000093228	1	64442908	64442977
U6	ENSMUSG00000065946	1	63346854	63346957
SNORD51	ENSMUSG00000064612	1	63225254	63225326
AL669947.1	ENSMUSG00000092705	1	63319800	63319937
Snora41	ENSMUSG00000064602	1	63225578	63225709
AL645950.1	ENSMUSG00000092874	1	63244605	63244730
U1	ENSMUSG00000077471	1	65047881	65048036
U6	ENSMUSG00000087823	1	63622062	63622164
Cryge	ENSMUSG00000070870	1	65095128	65097723
Pikfyve	ENSMUSG00000025949	1	65233324	65320586
Pth2r	ENSMUSG00000025946	1	65328630	65435818
Idh1	ENSMUSG00000025950	1	65205190	65233053
Crygd	ENSMUSG00000067299	1	65108446	65110026
Crygc	ENSMUSG00000025952	1	65118099	65120263
Crygb	ENSMUSG00000073658	1	65126804	65128862
Cryga	ENSMUSG00000044429	1	65146963	65149947
D630023F18Rik	ENSMUSG00000044816	1	65147193	65169788
Gm5255	ENSMUSG00000082565	1	65597038	65597811
Gm8805	ENSMUSG00000082774	1	65599256	65599568
Crygf	ENSMUSG00000025945	1	65973096	65974881
Gm8809	ENSMUSG00000081623	1	66078757	66079499
Gm15659	ENSMUSG00000083242	1	66079659	66079999
Gm8812	ENSMUSG00000083289	1	66109539	66109950
Mtap2	ENSMUSG00000015222	1	66221847	66489157
Unc80	ENSMUSG00000055567	1	66514941	66746440
Rpe	ENSMUSG00000026005	1	66747405	66766379
1110028C15Rik	ENSMUSG00000026004	1	66765817	66864169
Acadl	ENSMUSG00000026003	1	66877413	66909851
Myl1	ENSMUSG00000061816	1	66970869	66991978
Lancl1	ENSMUSG00000026000	1	67047091	67085446
Cps1	ENSMUSG00000025991	1	67169600	67277833
Gm10558	ENSMUSG00000073656	1	66368850	66375370
Gm15789	ENSMUSG00000082057	1	66830487	66833019
Gm15793	ENSMUSG00000082769	1	66895632	66896266
Gm10072	ENSMUSG00000059999	1	66995104	66995529
Gm15826	ENSMUSG00000082212	1	66998403	67000043
Gm15668	ENSMUSG00000086204	1	67295774	67370183
U7	ENSMUSG00000089518	1	66903153	66903209
SNORA17	ENSMUSG00000077328	1	66913371	66913500
SNORA17	ENSMUSG00000077745	1	67303798	67303926
U1	ENSMUSG00000065694	1	66482656	66482806
SNORA26	ENSMUSG00000088850	1	66352463	66352599
Kif22-ps	ENSMUSG00000082473	1	67631627	67633610
AC101752.1	ENSMUSG00000093566	1	67663549	67663626
Gm15669	ENSMUSG00000085075	1	67839055	67851898
Erbb4	ENSMUSG00000062209	1	68078760	69154633
Gm15671	ENSMUSG00000087329	1	68051660	68072470
AC101833.1	ENSMUSG00000093213	1	68020250	68020351
Ikzf2	ENSMUSG00000025997	1	69577788	69732534
Spag16	ENSMUSG00000053153	1	69873562	70771706
Gm16076	ENSMUSG00000087514	1	69138487	69153314
Gm8840	ENSMUSG00000084332	1	69177488	69177873
7SK	ENSMUSG00000089345	1	69968047	69968321
U6atac	ENSMUSG00000080524	1	70001578	70001703
U6	ENSMUSG00000075952	1	70643389	70643495
Vwc2l	ENSMUSG00000045648	1	70772289	70931971
Bard1	ENSMUSG00000026196	1	71074072	71149720
Abca12	ENSMUSG00000050296	1	71289664	71461484
Atic	ENSMUSG00000026192	1	71603724	71626205
Fn1	ENSMUSG00000026193	1	71632094	71699774
Apol7d	ENSMUSG00000073652	1	71699411	71709417
Gm5528	ENSMUSG00000060125	1	72050862	72051344
Mreg	ENSMUSG00000039395	1	72205807	72258881
Pecr	ENSMUSG00000026189	1	72305741	72330888
Tmem169	ENSMUSG00000026188	1	72330943	72349678
Xrcc5	ENSMUSG00000026187	1	72353995	72441526
March4	ENSMUSG00000039372	1	72473686	72583504
Smarcal1	ENSMUSG00000039354	1	72629825	72679708
Gm16236	ENSMUSG00000089965	1	71086226	71086604
Gm5829	ENSMUSG00000067744	1	71756276	71756629
Gm15843	ENSMUSG00000085812	1	72506073	72506601
D230017M19Rik	ENSMUSG00000085769	1	72283039	72321443
AC120136.3	ENSMUSG00000093333	1	72301582	72301772
AC120136.2	ENSMUSG00000093247	1	72283520	72283710
AC120136.1	ENSMUSG00000093111	1	72290787	72290977
U2	ENSMUSG00000075752	1	72272814	72273004
Ankar	ENSMUSG00000039342	1	72689554	72747138
Rpl37a	ENSMUSG00000046330	1	72757834	72760383
Igfbp2	ENSMUSG00000039323	1	72871077	72899048
Igfbp5	ENSMUSG00000026185	1	72904506	72921458
Tnp1	ENSMUSG00000026182	1	73061657	73062473
Tns1	ENSMUSG00000055322	1	73956805	74171021
Rufy4	ENSMUSG00000061815	1	74172115	74194797
Cxcr2	ENSMUSG00000026180	1	74200563	74207812
Cxcr1	ENSMUSG00000048480	1	74238359	74241205
Mir1928	ENSMUSG00000087820	1	74253128	74253194
U6	ENSMUSG00000075767	1	74259387	74259493
5S_rRNA	ENSMUSG00000088666	1	73810284	73810409
Arpc2	ENSMUSG00000006304	1	74283071	74314783
Gpbar1	ENSMUSG00000064272	1	74325124	74326198
Aamp	ENSMUSG00000006299	1	74326421	74331254
Pnkd	ENSMUSG00000026179	1	74331504	74400268
Tmbim1	ENSMUSG00000006301	1	74334821	74352196
Gm216	ENSMUSG00000073650	1	74408682	74415895
Slc11a1	ENSMUSG00000026177	1	74421777	74432636
Ctdsp1	ENSMUSG00000026176	1	74438083	74443859
Vil1	ENSMUSG00000026175	1	74455950	74482133
Usp37	ENSMUSG00000033364	1	74482084	74590860
Mir26b	ENSMUSG00000065468	1	74440884	74440968
Rqcd1	ENSMUSG00000026174	1	74552632	74577418
Plcd4	ENSMUSG00000026173	1	74589462	74614368
Zfp142	ENSMUSG00000026135	1	74611701	74634820
Bcs1l	ENSMUSG00000026172	1	74634863	74639017
Rnf25	ENSMUSG00000026171	1	74640322	74647971
Stk36	ENSMUSG00000033276	1	74648019	74683468
Ttll4	ENSMUSG00000033257	1	74708319	74748406
Cyp27a1	ENSMUSG00000026170	1	74760148	74784464
Prkag3	ENSMUSG00000006542	1	74786073	74795795
Wnt6	ENSMUSG00000033227	1	74818466	74831893
Wnt10a	ENSMUSG00000026167	1	74838090	74850753
Cdk5r2	ENSMUSG00000090071	1	74901508	74904005
Fev	ENSMUSG00000055197	1	74928083	74931993
Cryba2	ENSMUSG00000006546	1	74936508	74939717
Ccdc108	ENSMUSG00000047021	1	74948645	74982173
Ihh	ENSMUSG00000006538	1	74991891	74998246
Nhej1	ENSMUSG00000026162	1	75013713	75093213
Slc23a3	ENSMUSG00000026205	1	75122117	75130464
1810031K17Rik	ENSMUSG00000033159	1	75131128	75139271
Fam134a	ENSMUSG00000049339	1	75139360	75144483
Zfand2b	ENSMUSG00000026197	1	75165220	75168203
Abcb6	ENSMUSG00000026198	1	75168291	75176966
Atg9a	ENSMUSG00000033124	1	75177440	75188497
Glb1l	ENSMUSG00000026200	1	75194818	75207353
Stk16	ENSMUSG00000026201	1	75207413	75212181
Tuba4a	ENSMUSG00000026202	1	75211549	75215828
Dnajb2	ENSMUSG00000026203	1	75233040	75241379
Ptprn	ENSMUSG00000026204	1	75243616	75260783
Resp18	ENSMUSG00000033061	1	75268774	75274990
Dnpep	ENSMUSG00000026209	1	75304471	75314212
Des	ENSMUSG00000026208	1	75356904	75365154
Speg	ENSMUSG00000026207	1	75371872	75428895
Gmppa	ENSMUSG00000033021	1	75432505	75439754
Accn4	ENSMUSG00000033007	1	75447011	75470918
Chpf	ENSMUSG00000032997	1	75471144	75476046
Gm16582	ENSMUSG00000089964	1	74897469	74926527
Gm15841	ENSMUSG00000089653	1	74948945	74954227
Ankzf1	ENSMUSG00000026199	1	75188709	75195962
Gm15179	ENSMUSG00000085653	1	75364787	75371587
Gm15178	ENSMUSG00000086053	1	75388706	75392938
AC117610.1	ENSMUSG00000093155	1	74633470	74633546
Mir375	ENSMUSG00000065616	1	74947226	74947300
Obsl1	ENSMUSG00000026211	1	75475885	75503027
Tmem198	ENSMUSG00000051703	1	75476107	75482280
Inha	ENSMUSG00000032968	1	75503652	75506941
Stk11ip	ENSMUSG00000026213	1	75518104	75533910
Slc4a3	ENSMUSG00000006576	1	75542841	75558747
Gm15181	ENSMUSG00000082745	1	75510682	75510858
Gm15183	ENSMUSG00000082059	1	75538786	75539133
Gm15180	ENSMUSG00000083244	1	75564658	75565149
Gm15182	ENSMUSG00000082528	1	75621229	75622904
Wdfy1	ENSMUSG00000073643	1	79698837	79772718
Mrpl44	ENSMUSG00000026248	1	79772593	79778020
Serpine2	ENSMUSG00000026249	1	79790772	79855271
Fam124b	ENSMUSG00000043230	1	80195281	80215048
Cul3	ENSMUSG00000004364	1	80261498	80337055
Gm6189	ENSMUSG00000090637	1	80379679	80381763
Dock10	ENSMUSG00000038608	1	80497648	80755128
9430031J16Rik	ENSMUSG00000054976	1	81073525	81338339
Gm5529	ENSMUSG00000067106	1	79919111	79920082
U6	ENSMUSG00000064589	1	80132041	80132147
Gm5530	ENSMUSG00000087008	1	81738560	81739544
St8sia4	ENSMUSG00000040710	1	97484261	97564171
Slco4c1	ENSMUSG00000040693	1	98715361	98768748
Slco6b1	ENSMUSG00000045463	1	98808389	98894154
Slco6c1	ENSMUSG00000026331	1	98955615	99024830
Slco6b1	ENSMUSG00000090974	1	98802753	98894154
Gm6430	ENSMUSG00000044757	1	98921090	98923123
Gm5101	ENSMUSG00000092052	1	98768798	98777807
AC102463.2	ENSMUSG00000077860	1	98163428	98163518
U6	ENSMUSG00000064461	1	98513676	98513782
AC102463.1	ENSMUSG00000077014	1	98199723	98199832
U6	ENSMUSG00000065342	1	97728706	97728812
SNORA17	ENSMUSG00000077255	1	98658608	98658735
D1Ertd622e	ENSMUSG00000044768	1	99540480	99558651
Ppip5k2	ENSMUSG00000040648	1	99602625	99666988
Gin1	ENSMUSG00000026333	1	99666749	99690286
Pam	ENSMUSG00000026335	1	99691691	99992223
Rnf152	ENSMUSG00000047496	1	107173494	107253287
Pign	ENSMUSG00000056536	1	107417716	107555585
2310035C23Rik	ENSMUSG00000026319	1	107560438	107651708
Tnfrsf11a	ENSMUSG00000026321	1	107677300	107744558
Zcchc2	ENSMUSG00000038866	1	107886983	107930651
Phlpp1	ENSMUSG00000044340	1	108068329	108290827
Bcl2	ENSMUSG00000057329	1	108434755	108610851
Kdsr	ENSMUSG00000009905	1	108616987	108656319
Vps4b	ENSMUSG00000009907	1	108660648	108693305
Serpinb5	ENSMUSG00000067006	1	108757750	108779925
Serpinb12	ENSMUSG00000059956	1	108831026	108853657
Serpinb13	ENSMUSG00000048775	1	108877561	108897772
Serpinb3a	ENSMUSG00000044594	1	108942164	108948914
Serpinb3d	ENSMUSG00000058017	1	108974744	108980083
Serpinb3b	ENSMUSG00000073602	1	109050517	109174938
Serpinb3c	ENSMUSG00000073601	1	109167778	109174948
Gm17634	ENSMUSG00000090759	1	107252584	107258201
Gm3608	ENSMUSG00000067017	1	107352560	107353433
Gm10193	ENSMUSG00000067015	1	107661021	107661251
D630008O14Rik	ENSMUSG00000054006	1	108438520	108471622
Pou2f3-rs1	ENSMUSG00000083613	1	108784429	108785474
Gm8080	ENSMUSG00000084228	1	108916714	108921902
Gm15388	ENSMUSG00000083884	1	109034421	109035146
Gm8084	ENSMUSG00000080729	1	109088052	109090134
Gm15390	ENSMUSG00000081114	1	109150130	109150867
Gm8089	ENSMUSG00000084189	1	109186918	109198931
AC132082.1	ENSMUSG00000076999	1	107471264	107471359
U6	ENSMUSG00000089206	1	107842131	107842237
Serpinb11	ENSMUSG00000026327	1	109258506	109277052
Gm15391	ENSMUSG00000087210	1	109281777	109283989
Serpinb7	ENSMUSG00000067001	1	109296232	109349266
SNORA17	ENSMUSG00000089278	1	109336624	109336754
Serpinb2	ENSMUSG00000062345	1	109408000	109432055
Serpinb10-ps	ENSMUSG00000092572	1	109425580	109445848
Serpinb8	ENSMUSG00000026315	1	109486583	109505486
Gm15389	ENSMUSG00000086161	1	109583585	109590091
SNORA17	ENSMUSG00000077237	1	109789551	109789682
U6	ENSMUSG00000064683	1	109653179	109653285
Fam78b	ENSMUSG00000060568	1	168931548	169021433
Uck2	ENSMUSG00000053664	1	169153958	169154050
Uck2	ENSMUSG00000026558	1	169156221	169215258
Tmco1	ENSMUSG00000052428	1	169238801	169264109
Aldh9a1	ENSMUSG00000026687	1	169280122	169298661
Mgst3	ENSMUSG00000026688	1	169302097	169323972
Lrrc52	ENSMUSG00000040485	1	169375806	169396911
Rxrg	ENSMUSG00000015843	1	169528515	169569754
Lmx1a	ENSMUSG00000026686	1	169619370	169778872
Pbx1	ENSMUSG00000052534	1	170050130	170362401
Gm6286	ENSMUSG00000086925	1	168875728	168876489
RP23-45N11.1	ENSMUSG00000093538	1	170045375	170052596
Gm16701	ENSMUSG00000086622	1	168904155	168930972
U6	ENSMUSG00000064426	1	169279156	169279262
mmu-mir-2134-1	ENSMUSG00000088246	1	169270500	169270555
Cd48	ENSMUSG00000015355	1	173612140	173635389
Slamf1	ENSMUSG00000015316	1	173697258	173731315
Cd84	ENSMUSG00000038147	1	173769828	173820849
Gm10521	ENSMUSG00000073492	1	173825795	173828368
Slamf6	ENSMUSG00000015314	1	173847646	173879083
Vangl2	ENSMUSG00000026556	1	173931091	173958575
Nhlh1	ENSMUSG00000051251	1	173982423	173987704
Ncstn	ENSMUSG00000003458	1	173996144	174012926
Copa	ENSMUSG00000026553	1	174012660	174052461
Pex19	ENSMUSG00000003464	1	174056886	174066624
Dcaf8	ENSMUSG00000026554	1	174078146	174126524
Pea15a	ENSMUSG00000013698	1	174126859	174136935
Casq1	ENSMUSG00000007122	1	174140025	174150026
Atp1a4	ENSMUSG00000007107	1	174153644	174188545
Igsf8	ENSMUSG00000038034	1	174191772	174249972
Atp1a2	ENSMUSG00000007097	1	174201840	174228195
Kcnj9	ENSMUSG00000038026	1	174251164	174259394
Kcnj10	ENSMUSG00000044708	1	174271341	174304216
Pigm	ENSMUSG00000050229	1	174306662	174314230
Slamf9	ENSMUSG00000026548	1	174405489	174408706
Igsf9	ENSMUSG00000037995	1	174411919	174429009
Tagln2	ENSMUSG00000026547	1	174430178	174437511
Ccdc19	ENSMUSG00000026546	1	174451175	174476001
Vsig8	ENSMUSG00000049598	1	174486069	174493848
Slamf8	ENSMUSG00000053318	1	174511508	174520699
Fcrl6	ENSMUSG00000070504	1	174526771	174532682
Dusp23	ENSMUSG00000026544	1	174560900	174563105
Crp	ENSMUSG00000037942	1	174628187	174630097
Apcs	ENSMUSG00000026542	1	174824093	174825185
Olfr16	ENSMUSG00000037924	1	174886899	174887948
Olfr1408	ENSMUSG00000062527	1	175060331	175061367
Olfr1406	ENSMUSG00000058981	1	175113573	175114635
Olfr218	ENSMUSG00000046643	1	175133489	175134430
Olfr1404	ENSMUSG00000049456	1	175145738	175146771
Fcer1a	ENSMUSG00000005339	1	175151402	175157360
Olfr418-ps1	ENSMUSG00000049605	1	175200278	175201268
Gm11062	ENSMUSG00000079180	1	175204592	175207853
Darc	ENSMUSG00000037872	1	175262017	175263634
Cadm3	ENSMUSG00000005338	1	175264385	175297826
Aim2	ENSMUSG00000037860	1	175281010	175396171
Gm4955	ENSMUSG00000037849	1	175398640	175421172
BC094916	ENSMUSG00000070501	1	175449848	175466088
Pydc4	ENSMUSG00000073491	1	175497204	175529405
Pyhin1	ENSMUSG00000043263	1	175560990	175578059
Pydc3	ENSMUSG00000066677	1	175604042	175628523
Gm15431	ENSMUSG00000059058	1	173641219	173641413
Gm10171	ENSMUSG00000089803	1	174074403	174075032
Gm17224	ENSMUSG00000092085	1	174143152	174143811
4933439K11Rik	ENSMUSG00000085184	1	174468264	174488260
Olfr1407-ps1	ENSMUSG00000066680	1	175080262	175080503
7SK	ENSMUSG00000088813	1	174614646	174614972
U6	ENSMUSG00000065390	1	173663430	173663536
U6	ENSMUSG00000088291	1	173662191	173662245
SNORA17	ENSMUSG00000077252	1	174866343	174866465
U6	ENSMUSG00000070182	1	174773665	174773769
AI607873	ENSMUSG00000073490	1	175653814	175671878
Ifi204	ENSMUSG00000073489	1	175677424	175697050
Cdc42bpa	ENSMUSG00000026490	1	181890603	182095734
Adck3	ENSMUSG00000026489	1	182095369	182129733
Psen2	ENSMUSG00000010609	1	182157135	182193569
Gm5069	ENSMUSG00000055676	1	182257102	182260681
Itpkb	ENSMUSG00000038855	1	182260607	182354933
6330403A02Rik	ENSMUSG00000053963	1	182362518	182413598
Parp1	ENSMUSG00000026496	1	182499086	182531384
Lin9	ENSMUSG00000058729	1	182571498	182620816
Mixl1	ENSMUSG00000026497	1	182623174	182627165
Acbd3	ENSMUSG00000026499	1	182656174	182684334
H3f3a	ENSMUSG00000060743	1	182730963	182744074
BC031781	ENSMUSG00000038806	1	182781282	182798228
Lefty2	ENSMUSG00000066652	1	182823239	182829234
Pycr2	ENSMUSG00000026520	1	182834405	182838218
Lefty1	ENSMUSG00000038793	1	182865153	182868531
Tmem63a	ENSMUSG00000026519	1	182872475	182905243
Ephx1	ENSMUSG00000038776	1	182906286	182951035
9130409I23Rik	ENSMUSG00000038768	1	182981368	182990798
Nvl	ENSMUSG00000026516	1	183023554	183074288
Cnih4	ENSMUSG00000062169	1	183081062	183099125
Wdr26	ENSMUSG00000038733	1	183103359	183142109
A430110L20Rik	ENSMUSG00000054135	1	183156207	183158621
Cnih3	ENSMUSG00000026514	1	183282759	183390772
Ccdc121	ENSMUSG00000050625	1	183439764	183441582
Dnahc14	ENSMUSG00000047369	1	183669119	183699805
Lbr	ENSMUSG00000004880	1	183745447	183772532
Gm5533	ENSMUSG00000056699	1	183781739	183783320
Enah	ENSMUSG00000022995	1	183834576	183950111
Gm17275	ENSMUSG00000090986	1	182732699	182739614
2210411M09Rik	ENSMUSG00000085563	1	182882195	182888280
Rpl35a-ps2	ENSMUSG00000081214	1	183172076	183172498
Gm16067	ENSMUSG00000073485	1	182743907	182746990
Gm16547	ENSMUSG00000089888	1	183330595	183330887
Gm16539	ENSMUSG00000089927	1	183361854	183362531
U6	ENSMUSG00000064970	1	183743738	183743831
U6	ENSMUSG00000084558	1	182762900	182763007
AC167020.1	ENSMUSG00000092967	1	182663926	182664013
5S_rRNA	ENSMUSG00000089429	1	183770584	183770699
Srp9	ENSMUSG00000026511	1	184054868	184062538
Vmn1r1	ENSMUSG00000091013	1	184087275	184088450
Degs1	ENSMUSG00000038633	1	184205903	184212935
Fbxo28	ENSMUSG00000047539	1	184243233	184271737
Gm10517	ENSMUSG00000073482	1	184338750	184339151
Trp53bp2	ENSMUSG00000026510	1	184339303	184392563
Capn2	ENSMUSG00000026509	1	184397391	184447655
Gm16721	ENSMUSG00000087419	1	184414398	184414958
Capn8	ENSMUSG00000038599	1	184495138	184562483
4922505E12Rik	ENSMUSG00000043429	1	184677388	184679253
Susd4	ENSMUSG00000038576	1	184693991	184826729
Tlr5	ENSMUSG00000079164	1	184884919	184906175
Gm8214	ENSMUSG00000090533	1	185505657	185506073
Dusp10	ENSMUSG00000039384	1	185837181	185899515
1700056E22Rik	ENSMUSG00000044854	1	185856911	185857453
U6	ENSMUSG00000089057	1	186403988	186404085
Rpl21-ps1	ENSMUSG00000059483	1	186441127	186441609
Hlx	ENSMUSG00000039377	1	186551019	186556498
4930488B22Rik	ENSMUSG00000092578	1	186536376	186542868
Mosc1	ENSMUSG00000026621	1	186610655	186635192
Mosc2	ENSMUSG00000073481	1	186636947	186670330
Mir1981	ENSMUSG00000088559	1	186646286	186646367
7SK	ENSMUSG00000088562	1	186681959	186682291
C130074G19Rik	ENSMUSG00000039349	1	186695805	186707097
Mark1	ENSMUSG00000026620	1	186720322	186823428
Rab3gap2	ENSMUSG00000039318	1	187028047	187110622
Iars2	ENSMUSG00000026618	1	187108605	187153275
Bpnt1	ENSMUSG00000026617	1	187156028	187181656
Snora36b	ENSMUSG00000077571	1	187066786	187066917
Mir194-1	ENSMUSG00000065581	1	187137198	187137264
Mir215	ENSMUSG00000065562	1	187137460	187137571
Ush2a	ENSMUSG00000026609	1	190085902	190788920
Kctd3	ENSMUSG00000026608	1	190794977	190831719
Kcnk2	ENSMUSG00000037624	1	191031816	191167711
Cenpf	ENSMUSG00000026605	1	191464478	191511965
Ptpn14	ENSMUSG00000026604	1	191552147	191700574
Smyd2	ENSMUSG00000026603	1	191704371	191746242
Prox1	ENSMUSG00000010175	1	191941917	191994559
Gm17653	ENSMUSG00000090445	1	191657020	191660499
Gm17566	ENSMUSG00000079045	1	191994175	192041155
AC121892.1	ENSMUSG00000077884	1	190343232	190343322
SNORA17	ENSMUSG00000077235	1	190446802	190446932
mmu-mir-1194	ENSMUSG00000080505	1	191217229	191217349
U6	ENSMUSG00000084550	1	190584355	190584458
AC124613.1	ENSMUSG00000093064	1	192306751	192307036
Rps6kc1	ENSMUSG00000089872	1	192524081	192735649
Angel2	ENSMUSG00000026634	1	192748991	192770841
Vash2	ENSMUSG00000037568	1	192771527	192803175
Mfsd7b	ENSMUSG00000066595	1	192829711	192850069
1700022P22Rik	ENSMUSG00000057072	1	192860701	192866821
Tatdn3	ENSMUSG00000026632	1	192869705	192886811
Nsl1	ENSMUSG00000062510	1	192886891	192908437
Batf3	ENSMUSG00000026630	1	192922293	192932822
Fam71a	ENSMUSG00000091017	1	192986463	192988696
Atf3	ENSMUSG00000026628	1	192994175	193007219
Nenf	ENSMUSG00000037499	1	193130668	193142073
Tmem206	ENSMUSG00000026627	1	193149791	193174793
Ppp2r5a	ENSMUSG00000026626	1	193175860	193220920
D730003I15Rik	ENSMUSG00000073478	1	193048353	193049565
7SK	ENSMUSG00000088461	1	193020785	193020892
Dtl	ENSMUSG00000037474	1	193361244	193399413
Ints7	ENSMUSG00000037461	1	193399642	193446551
Lpgat1	ENSMUSG00000026623	1	193541713	193608134
Nek2	ENSMUSG00000026622	1	193645323	193656929
1700034H15Rik	ENSMUSG00000055833	1	193714112	193731406
Slc30a1	ENSMUSG00000037434	1	193730646	193737126
Rd3	ENSMUSG00000049353	1	193801270	193810273
Traf5	ENSMUSG00000026637	1	193821311	193916440
Rcor3	ENSMUSG00000037395	1	193922652	193961892
Kcnh1	ENSMUSG00000058248	1	194014666	194334041
Hhat	ENSMUSG00000037375	1	194336710	194597413
A730013G03Rik	ENSMUSG00000047384	1	194659363	194660913
Sertad4	ENSMUSG00000016262	1	194670625	194681946
Syt14	ENSMUSG00000016200	1	194723404	194861911
Diexf	ENSMUSG00000016181	1	194930597	194956445
Irf6	ENSMUSG00000026638	1	194979306	194998236
A130010J15Rik	ENSMUSG00000079144	1	194994243	195002497
Traf3ip3	ENSMUSG00000037318	1	195001700	195027897
Gm16621	ENSMUSG00000085764	1	193916253	193923511
Gm10516	ENSMUSG00000073476	1	193960780	193974895
Gm15867	ENSMUSG00000089812	1	194681122	194682660
Gm15872	ENSMUSG00000090080	1	195013569	195018205
4930570N18Rik	ENSMUSG00000089683	1	195029233	195052402
1600010F14Rik	ENSMUSG00000089688	1	195033944	195080668
U5	ENSMUSG00000064881	1	194571765	194571880
7SK	ENSMUSG00000089158	1	194824480	194824768
U6	ENSMUSG00000064845	1	193596600	193596713
U6	ENSMUSG00000065821	1	193586079	193586182
Mir3473c	ENSMUSG00000093003	1	193822435	193822515
Hsd11b1	ENSMUSG00000016194	1	195047824	195090248
G0s2	ENSMUSG00000009633	1	195098355	195099382
Lamb3	ENSMUSG00000026639	1	195128151	195170072
Camk1g	ENSMUSG00000016179	1	195172540	195196491
Plxna2	ENSMUSG00000026640	1	196446023	196643063
4631405K08Rik	ENSMUSG00000091593	1	195333432	195335997
Mir205	ENSMUSG00000065533	1	195333657	195333724
Cd34	ENSMUSG00000016494	1	196765015	196787486
7SK	ENSMUSG00000084631	1	196684851	196685144
Mir3962	ENSMUSG00000092633	1	196648195	196648258
Gm16897	ENSMUSG00000086469	1	196781953	196803153
Lnp	ENSMUSG00000009207	2	74358348	74417492
Evx2	ENSMUSG00000001815	2	74491049	74497918
Hoxd13	ENSMUSG00000001819	2	74506367	74509656
Hoxd12	ENSMUSG00000001823	2	74512986	74515763
Hoxd11	ENSMUSG00000042499	2	74517449	74525798
Hoxd10	ENSMUSG00000050368	2	74529147	74533163
Gm14396	ENSMUSG00000086077	2	74533577	74535432
Hoxd9	ENSMUSG00000043342	2	74535737	74538265
Hoxd8	ENSMUSG00000027102	2	74542672	74545990
Osbpl6	ENSMUSG00000042359	2	76244565	76438704
Nfe2l2	ENSMUSG00000015839	2	75513570	75542698
Agps	ENSMUSG00000042410	2	75670234	75769407
Ttc30b	ENSMUSG00000075273	2	75773920	75776519
Ttc30a2	ENSMUSG00000075272	2	75814129	75816257
Ttc30a1	ENSMUSG00000075271	2	75817163	75820024
Pde11a	ENSMUSG00000075270	2	75827198	76176831
Cyct	ENSMUSG00000056436	2	76191999	76198507
Rbm45	ENSMUSG00000042369	2	76208041	76221825
4930445N08Rik	ENSMUSG00000087205	2	74417133	74422601
Mrpl23-ps1	ENSMUSG00000075279	2	74429387	74429974
Gm13672	ENSMUSG00000082973	2	74469897	74470355
Gm20440	ENSMUSG00000092315	2	74521503	74532251
1700109F18Rik	ENSMUSG00000052371	2	74541305	74554187
6720416L17Rik	ENSMUSG00000075277	2	74586479	74600953
Gm14424	ENSMUSG00000085015	2	74590741	74591801
Gm14426	ENSMUSG00000086559	2	74592512	74593154
Gm14425	ENSMUSG00000081156	2	74693763	74694368
Gm14427	ENSMUSG00000083837	2	74724429	74725063
Gm13652	ENSMUSG00000087333	2	74962928	74975855
A330043C09Rik	ENSMUSG00000086044	2	74985175	75015715
Gm13654	ENSMUSG00000081406	2	75029091	75029887
Gm13653	ENSMUSG00000075276	2	75030334	75030849
Gm13659	ENSMUSG00000086200	2	75149137	75151238
Gm13658	ENSMUSG00000087504	2	75274114	75282236
Gm13660	ENSMUSG00000086576	2	75297023	75302845
Gm13655	ENSMUSG00000082152	2	75470695	75471439
E030042O20Rik	ENSMUSG00000087222	2	75542827	75548081
Gm13656	ENSMUSG00000087527	2	75567649	75568229
Gm13657	ENSMUSG00000086813	2	75615245	75620363
Gm13669	ENSMUSG00000081833	2	75646415	75646871
Gm13670	ENSMUSG00000082187	2	75660085	75660850
Hnrnpa3	ENSMUSG00000059005	2	75497318	75507464
Hoxd3	ENSMUSG00000079277	2	74549986	74586331
Hoxd4	ENSMUSG00000042464	2	74560035	74567217
Hoxd1	ENSMUSG00000042448	2	74601037	74603200
Mtx2	ENSMUSG00000027099	2	74663860	74716488
AL928905.1	ENSMUSG00000092825	2	76317276	76317386
n-R5s198	ENSMUSG00000084574	2	74773472	74773571
Mir10b	ENSMUSG00000065500	2	74564127	74564194
U6	ENSMUSG00000065237	2	74462699	74462805
AL772404.1	ENSMUSG00000093242	2	75497301	75497374
U6	ENSMUSG00000089015	2	75524797	75524895
Atg13	ENSMUSG00000027244	2	91514775	91550733
Harbi1	ENSMUSG00000027243	2	91551009	91561702
Ambra1	ENSMUSG00000040506	2	91570291	91759006
Chrm4	ENSMUSG00000040495	2	91762346	91769986
Mdk	ENSMUSG00000027239	2	91769962	91772454
Dgkz	ENSMUSG00000040479	2	91772981	91816021
Gm9821	ENSMUSG00000047923	2	91785862	91786173
Creb3l1	ENSMUSG00000027230	2	91822485	91864659
Phf21a	ENSMUSG00000058318	2	91933274	92204823
Gyltl1b	ENSMUSG00000040434	2	92205203	92215026
Pex16	ENSMUSG00000027222	2	92214833	92221374
1700029I15Rik	ENSMUSG00000044916	2	92223075	92225865
Mapk8ip1	ENSMUSG00000027223	2	92223833	92241420
Cry2	ENSMUSG00000068742	2	92243803	92274200
Slc35c1	ENSMUSG00000049922	2	92292921	92300695
Chst1	ENSMUSG00000027221	2	92439864	92455407
Syt13	ENSMUSG00000027220	2	92755255	92796215
Prdm11	ENSMUSG00000075028	2	92805308	92886324
Trp53i11	ENSMUSG00000068735	2	93027705	93041916
Tspan18	ENSMUSG00000027217	2	93041917	93174662
Tspan18	ENSMUSG00000023461	2	93151420	93174663
Cd82	ENSMUSG00000027215	2	93259268	93303297
Gm10803	ENSMUSG00000075024	2	93400725	93404518
Alx4	ENSMUSG00000040310	2	93482541	93521496
Gm13776	ENSMUSG00000082457	2	91556316	91557576
Gm10805	ENSMUSG00000075036	2	91760685	91761085
Gm13780	ENSMUSG00000087197	2	91883530	91936199
2900072N19Rik	ENSMUSG00000087018	2	91895146	91899526
Gm13786	ENSMUSG00000083951	2	92073262	92073594
Gm13785	ENSMUSG00000081730	2	92152311	92153000
D930015M05Rik	ENSMUSG00000084781	2	92249049	92272465
Gm13814	ENSMUSG00000085261	2	92324083	92369966
Gm13817	ENSMUSG00000085293	2	92369850	92381136
Gm13815	ENSMUSG00000080860	2	92401426	92401837
Gm13816	ENSMUSG00000085976	2	92582387	92599365
Gm13791	ENSMUSG00000086980	2	92696324	92753820
Gm13792	ENSMUSG00000082700	2	92713044	92713466
4631405J19Rik	ENSMUSG00000075027	2	92868113	92884889
Gm13802	ENSMUSG00000087559	2	92926099	92938401
Gm13807	ENSMUSG00000085852	2	93243704	93257987
Gm10804	ENSMUSG00000075025	2	93292976	93310028
AL683882.1	ENSMUSG00000077883	2	93023045	93023131
Mir1955	ENSMUSG00000088639	2	92032134	92032231
5S_rRNA	ENSMUSG00000089073	2	93226884	93226986
Ext2	ENSMUSG00000027198	2	93535788	93662725
Accs	ENSMUSG00000040272	2	93673624	93690100
Accsl	ENSMUSG00000075023	2	93695518	93709314
Alkbh3	ENSMUSG00000040174	2	93820707	93850964
Hsd17b12	ENSMUSG00000027195	2	93872846	93998121
Ttc17	ENSMUSG00000027194	2	94140924	94246846
Gm13818	ENSMUSG00000081353	2	93634727	93635241
Gm1335	ENSMUSG00000083009	2	93780456	93781035
Gm13889	ENSMUSG00000087006	2	93795967	93797684
Gm13889	ENSMUSG00000075021	2	93796536	93797284
4921507L20Rik	ENSMUSG00000027196	2	93820191	93823732
E530001K10Rik	ENSMUSG00000075020	2	94092036	94104915
AL683878.1	ENSMUSG00000093033	2	94024184	94024287
AL732472.1	ENSMUSG00000078012	2	93738199	93738290
Mir129-2	ENSMUSG00000065511	2	94081521	94081610
Mir670	ENSMUSG00000076335	2	94101457	94101556
Api5	ENSMUSG00000027193	2	94251839	94278293
Itpa-ps1	ENSMUSG00000081476	2	94224659	94225255
2810002D19Rik	ENSMUSG00000045464	2	94246308	94251839
Gm13788	ENSMUSG00000083204	2	94430978	94431578
Gm13793	ENSMUSG00000087069	2	94569171	94570895
Gm13795	ENSMUSG00000080739	2	95164847	95165141
SNORA17	ENSMUSG00000077678	2	94462115	94462245
SNORA17	ENSMUSG00000077281	2	94632362	94632493
Gm13794	ENSMUSG00000084906	2	95234399	95237808
Gm13796	ENSMUSG00000083739	2	95515934	95516246
Gm13798	ENSMUSG00000081757	2	95517874	95518012
Lrrc4c	ENSMUSG00000050587	2	96158326	97471823
Gm13797	ENSMUSG00000083846	2	95538074	95538193
Gm13799	ENSMUSG00000087537	2	95678245	95680751
Gm13800	ENSMUSG00000083797	2	95911686	95911851
Gm13801	ENSMUSG00000082327	2	95973592	95973751
Pdhx	ENSMUSG00000010914	2	102861232	102913670
Apip	ENSMUSG00000010911	2	102913832	102932801
Ehf	ENSMUSG00000012350	2	103103590	103143435
Elf5	ENSMUSG00000027186	2	103251845	103291146
Cat	ENSMUSG00000027187	2	103294006	103325317
Abtb2	ENSMUSG00000032724	2	103406467	103558580
Nat10	ENSMUSG00000027185	2	103561413	103601427
Caprin1	ENSMUSG00000027184	2	103603098	103637806
Lmo2	ENSMUSG00000032698	2	103798143	103822035
4931422A03Rik	ENSMUSG00000046085	2	103807100	103868518
Fbxo3	ENSMUSG00000027180	2	103867878	103903397
Gm10912	ENSMUSG00000078091	2	103905983	103907643
Gm10799	ENSMUSG00000075006	2	103908204	103908707
Cd59b	ENSMUSG00000068686	2	103910006	103931344
Cd59a	ENSMUSG00000032679	2	103935958	103955511
Fjx1	ENSMUSG00000075012	2	102289525	102291949
Pamr1	ENSMUSG00000027188	2	102390169	102483198
Slc1a2	ENSMUSG00000005089	2	102498816	102630941
Cd44	ENSMUSG00000005087	2	102651298	102741822
Gm13872	ENSMUSG00000087185	2	102578064	102586917
Gm10038	ENSMUSG00000058281	2	102939312	102939758
Gm13874	ENSMUSG00000087032	2	103017944	103026838
Gm13869	ENSMUSG00000086957	2	103046366	103050514
Gm13873	ENSMUSG00000084385	2	103072695	103073121
A930006I01Rik	ENSMUSG00000087278	2	103178758	103212921
BC016548	ENSMUSG00000070794	2	103217800	103229201
Gm13996	ENSMUSG00000081687	2	103387416	103387845
4930547E08Rik	ENSMUSG00000086687	2	103644609	103650779
Gm13878	ENSMUSG00000081348	2	103651043	103651774
Gm13880	ENSMUSG00000081010	2	103659157	103659633
Gm13877	ENSMUSG00000083495	2	103677258	103677674
Gm13875	ENSMUSG00000081275	2	103679111	103679392
Gm13879	ENSMUSG00000082845	2	103683572	103683813
Gm13876	ENSMUSG00000083643	2	103728481	103728741
Gm13881	ENSMUSG00000084756	2	103752181	103759117
Gm13883	ENSMUSG00000087473	2	104096829	104115914
Gm13882	ENSMUSG00000081721	2	104131681	104132912
A930018P22Rik	ENSMUSG00000032671	2	103962926	103964906
D430041D05Rik	ENSMUSG00000068373	2	103983230	104250491
Hipk3	ENSMUSG00000027177	2	104266638	104334603
U6	ENSMUSG00000065683	2	102738117	102738223
AL928544.2	ENSMUSG00000076234	2	103679266	103679361
SNORA17	ENSMUSG00000089606	2	104068269	104068395
Mir1902	ENSMUSG00000084516	2	104269018	104269097
AL928544.1	ENSMUSG00000076233	2	103683575	103683670
SCARNA21	ENSMUSG00000087739	2	103880826	103880964
5S_rRNA	ENSMUSG00000088700	2	104130017	104130129
Pax6	ENSMUSG00000027168	2	105509053	105543317
Elp4	ENSMUSG00000027167	2	105537477	105744721
Immp1l	ENSMUSG00000042670	2	105744795	105805715
Dnajc24	ENSMUSG00000027166	2	105806866	105843706
Dcdc5	ENSMUSG00000074981	2	106062214	106246308
Mpped2	ENSMUSG00000016386	2	106533426	106708513
2700007P21Rik	ENSMUSG00000027122	2	106802684	106814581
Fshb	ENSMUSG00000027120	2	106896297	106899813
Kcna4	ENSMUSG00000042604	2	107130796	107138659
Pax6os1	ENSMUSG00000086029	2	105376237	105510487
Rpl10-ps1	ENSMUSG00000080859	2	105394358	105395002
Gm13954	ENSMUSG00000084870	2	105549156	105550255
BC048594	ENSMUSG00000086131	2	105843493	105880783
Gm13992	ENSMUSG00000083425	2	105855357	105855512
Gm13993	ENSMUSG00000083506	2	106015686	106070447
Gm14013	ENSMUSG00000081258	2	106105464	106105733
Gm14015	ENSMUSG00000087226	2	106303980	106363260
Gm14014	ENSMUSG00000087225	2	106414948	106420997
BB218582	ENSMUSG00000085218	2	106483071	106490521
Gm13901	ENSMUSG00000085530	2	106756928	106757395
Gm13902	ENSMUSG00000084164	2	106766722	106767326
Gm13900	ENSMUSG00000081966	2	106840905	106841402
Gm13904	ENSMUSG00000082066	2	106851095	106851931
Gm13903	ENSMUSG00000083181	2	106963925	106964117
BX649381.1	ENSMUSG00000093363	2	105832914	105833038
RNaseP_nuc	ENSMUSG00000089408	2	106937363	106937632
n-R5s201	ENSMUSG00000084571	2	105837189	105837304
SCARNA4	ENSMUSG00000088078	2	106649492	106649615
Gm9864	ENSMUSG00000052005	2	107435787	107440696
Gm13912	ENSMUSG00000086758	2	108023873	108131476
SNORA17	ENSMUSG00000077480	2	107726665	107726796
SNORA17	ENSMUSG00000077411	2	107920069	107920199
Gm13916	ENSMUSG00000083590	2	108286614	108287241
Gm13915	ENSMUSG00000082113	2	108412751	108413681
Gm13913	ENSMUSG00000083347	2	108418287	108418546
Mettl15	ENSMUSG00000057234	2	108932454	109120905
Kif18a	ENSMUSG00000027115	2	109120895	109181904
Gm13914	ENSMUSG00000083697	2	108573369	108574359
Rpl35a-ps4	ENSMUSG00000083424	2	108715083	108715415
Gm13910	ENSMUSG00000063684	2	108788963	108790390
Gm13923	ENSMUSG00000087544	2	108862844	108865601
Gm13924	ENSMUSG00000084167	2	109298405	109298890
BX813309.1	ENSMUSG00000076987	2	108988746	108988855
Gm15952	ENSMUSG00000085655	3	35831967	35841639
A330050B17Rik	ENSMUSG00000086392	3	35898755	35924028
Gm11548	ENSMUSG00000085320	3	36398726	36405731
Gm11549	ENSMUSG00000085007	3	36413979	36420735
Gm11550	ENSMUSG00000083388	3	36438305	36439003
Gm12377	ENSMUSG00000082548	3	36593724	36593975
Gm12376	ENSMUSG00000084027	3	36723274	36723880
Gm12531	ENSMUSG00000086090	3	36951137	36958957
Gm12582	ENSMUSG00000081705	3	36976577	36977273
Gm12583	ENSMUSG00000082878	3	37007096	37007948
Gm12584	ENSMUSG00000083857	3	37015656	37016760
Gm12532	ENSMUSG00000084754	3	37081807	37087515
Gm13621	ENSMUSG00000081634	3	37098901	37099901
Gm12533	ENSMUSG00000083575	3	37114762	37114899
Gm12534	ENSMUSG00000086517	3	37130255	37131391
Gm12540	ENSMUSG00000083353	3	37225994	37226312
Gm12541	ENSMUSG00000054779	3	37234254	37248662
Gm12563	ENSMUSG00000083696	3	37380414	37380515
Gm12564	ENSMUSG00000080723	3	37455105	37455425
Gm12565	ENSMUSG00000081093	3	37498346	37498994
4930594O21Rik	ENSMUSG00000085677	3	37512835	37514198
Gm15450	ENSMUSG00000063001	3	37613662	37614100
Adad1	ENSMUSG00000027719	3	36962449	37020846
Il2	ENSMUSG00000027720	3	37019445	37024881
Il21	ENSMUSG00000027718	3	37121681	37131540
Cetn4	ENSMUSG00000045031	3	37206671	37211630
Spry1	ENSMUSG00000037211	3	37538869	37543520
Gm5148	ENSMUSG00000058174	3	37613112	37623412
Mccc1	ENSMUSG00000027709	3	35858234	35899600
Ccdc144b	ENSMUSG00000047696	3	35906169	35952469
Acad9	ENSMUSG00000027710	3	35964901	35993866
D3Ertd254e	ENSMUSG00000033883	3	36058444	36065142
Qrfpr	ENSMUSG00000058400	3	36078346	36121197
Anxa5	ENSMUSG00000027712	3	36347847	36374765
1810062G17Rik	ENSMUSG00000027713	3	36375057	36380898
Exosc9	ENSMUSG00000027714	3	36451528	36464651
Ccna2	ENSMUSG00000027715	3	36463788	36471072
Bbs7	ENSMUSG00000037325	3	36472064	36512399
Trpc3	ENSMUSG00000027716	3	36519404	36589089
4932438A13Rik	ENSMUSG00000037270	3	36762028	36951955
Fgf2	ENSMUSG00000037225	3	37211441	37304299
Bbs12	ENSMUSG00000051444	3	37211476	37220375
Nudt6	ENSMUSG00000050174	3	37303832	37319133
Spata5	ENSMUSG00000027722	3	37318818	37478018
AL691478.1	ENSMUSG00000076974	3	37155706	37155815
SNORA17	ENSMUSG00000089123	3	37701466	37701574
Gm16016	ENSMUSG00000083538	3	57332154	57332703
Gm5537	ENSMUSG00000069008	3	57906916	57908169
F830104G03Rik	ENSMUSG00000074592	3	56693900	56694515
Tm4sf1	ENSMUSG00000027800	3	57089533	57105841
Tm4sf4	ENSMUSG00000027801	3	57229236	57245599
Wwtr1	ENSMUSG00000027803	3	57259571	57379832
Commd2	ENSMUSG00000036513	3	57446826	57455637
Gm410	ENSMUSG00000074591	3	57470407	57496459
Rnf13	ENSMUSG00000036503	3	57539993	57639347
Pfn2	ENSMUSG00000027805	3	57645817	57651486
Tsc22d2	ENSMUSG00000027806	3	58219437	58270709
Serp1	ENSMUSG00000027808	3	58325891	58329795
Eif2a	ENSMUSG00000027810	3	58329743	58361423
2810407C02Rik	ENSMUSG00000075700	3	58380558	58397055
Fam194a	ENSMUSG00000070471	3	58420222	58441129
Siah2	ENSMUSG00000036432	3	58478860	58496322
Gm16743	ENSMUSG00000084778	3	57424827	57429740
4930593A02Rik	ENSMUSG00000087019	3	58496511	58601253
U7	ENSMUSG00000088430	3	57175392	57175451
U6	ENSMUSG00000065722	3	58094173	58094279
SNORA17	ENSMUSG00000077190	3	56858072	56858201
U6	ENSMUSG00000088570	3	57726010	57726109
Clrn1	ENSMUSG00000043850	3	58647950	58689262
Vmn2r1	ENSMUSG00000027824	3	63885564	63909380
Vmn2r2	ENSMUSG00000043897	3	63920354	63944465
Vmn2r3	ENSMUSG00000091572	3	64062883	64091417
Gm16162	ENSMUSG00000090131	3	63629716	63630366
Gm16129	ENSMUSG00000085290	3	63647038	63647991
Gm9479	ENSMUSG00000090303	3	63856953	63859532
Gm5139	ENSMUSG00000093447	3	63967312	63967560
Gm18294	ENSMUSG00000093416	3	63999496	64017599
Vmn2r-ps4	ENSMUSG00000093503	3	64132582	64136775
Vmn2r-ps5	ENSMUSG00000091967	3	64143487	64161646
Gm17548	ENSMUSG00000091540	3	63767555	63772581
Arhgef26	ENSMUSG00000036885	3	62142266	62266143
Dhx36	ENSMUSG00000027770	3	62273961	62310926
Gpr149	ENSMUSG00000043441	3	62332999	62409062
Mme	ENSMUSG00000027820	3	63099794	63186153
Plch1	ENSMUSG00000036834	3	63500156	63703394
E130311K13Rik	ENSMUSG00000048581	3	63718606	63733394
Gmps	ENSMUSG00000027823	3	63780028	63826501
Slc33a1	ENSMUSG00000027822	3	63737429	63768690
U6	ENSMUSG00000088360	3	63574134	63574231
U6	ENSMUSG00000088957	3	63292915	63293020
snoU13	ENSMUSG00000089457	3	63711633	63711734
snoU109	ENSMUSG00000088735	3	64122329	64122486
SCARNA14	ENSMUSG00000089175	3	62956139	62956280
U6	ENSMUSG00000089039	3	63913557	63913659
Vmn2r4	ENSMUSG00000092049	3	64192543	64219218
Vmn2r5	ENSMUSG00000068999	3	64294743	64313657
Vmn2r6	ENSMUSG00000090581	3	64341483	64369220
Vmn2r-ps6	ENSMUSG00000093395	3	64240805	64242209
Vmn2r-ps7	ENSMUSG00000093546	3	64246522	64247897
RP23-445D13.2	ENSMUSG00000093671	3	64251889	64264017
Vmn2r-ps8	ENSMUSG00000093375	3	64280940	64283241
Vmn2r7	ENSMUSG00000062200	3	64494582	64648687
Vmn2r-ps9	ENSMUSG00000093699	3	64395437	64396818
RP23-445D13.4	ENSMUSG00000093484	3	64400835	64409695
Vmn2r-ps10	ENSMUSG00000093646	3	64425616	64427917
Vmn2r-ps10	ENSMUSG00000090261	3	64427143	64427917
Vmn2r-ps11	ENSMUSG00000093434	3	64436496	64648665
AC110575.2	ENSMUSG00000093524	3	64436785	64648665
Vmn2r-ps12	ENSMUSG00000093474	3	64548671	64549567
Vmn2r-ps12	ENSMUSG00000090010	3	64548671	64549539
RP24-549B23.7	ENSMUSG00000093414	3	64574208	64574440
Vmn2r-ps13	ENSMUSG00000093767	3	64703079	64703684
SNORA17	ENSMUSG00000088824	3	64698393	64698518
Kcnab1	ENSMUSG00000027827	3	64913306	65182145
Ssr3	ENSMUSG00000027828	3	65183577	65196545
4931440P22Rik	ENSMUSG00000074580	3	65311179	65333301
Tiparp	ENSMUSG00000034640	3	65332332	65359067
Lekr1	ENSMUSG00000074579	3	65470150	65635084
Ccnl1	ENSMUSG00000027829	3	65750073	65762171
A730090N16Rik	ENSMUSG00000090120	3	65128698	65153351
Gm5540	ENSMUSG00000048916	3	65197259	65199106
U6	ENSMUSG00000065330	3	65575433	65575539
U6	ENSMUSG00000087825	3	65329623	65329715
Veph1	ENSMUSG00000027831	3	65857483	66100759
Ptx3	ENSMUSG00000027832	3	66023809	66029728
Shox2	ENSMUSG00000093425	3	66775217	66785693
Shox2	ENSMUSG00000027833	3	66775649	66785693
Rsrc1	ENSMUSG00000034544	3	66785312	67162318
U6	ENSMUSG00000065245	3	66859880	66859986
U1	ENSMUSG00000064522	3	65892031	65892183
Lphn2	ENSMUSG00000028184	3	148478550	148652280
Gm9912	ENSMUSG00000053583	3	148848115	148848459
Gm10287	ENSMUSG00000070342	3	148884657	148888709
U6	ENSMUSG00000089269	3	149003867	149003972
U6	ENSMUSG00000065270	3	148691896	148692002
SNORA17	ENSMUSG00000077441	3	148017051	148017182
2610301B20Rik	ENSMUSG00000059482	4	10801645	10826572
Plekhf2	ENSMUSG00000049969	4	10915809	10935074
2310030N02Rik	ENSMUSG00000050323	4	10978192	11003352
Trp53inp1	ENSMUSG00000028211	4	11083578	11101526
Ccne2	ENSMUSG00000028212	4	11118498	11131926
Ints8	ENSMUSG00000040738	4	11126305	11181405
Dpy19l4	ENSMUSG00000045205	4	11188462	11249284
Esrp1	ENSMUSG00000040728	4	11259080	11313930
Gm17283	ENSMUSG00000067549	4	11336959	11407948
1110037F02Rik	ENSMUSG00000040720	4	11413105	11477831
Rad54b	ENSMUSG00000078773	4	11486096	11542952
Rad54b	ENSMUSG00000066307	4	11506812	11511983
Gem	ENSMUSG00000028214	4	11631604	11641899
Cdh17	ENSMUSG00000028217	4	11685294	11745042
Pdp1	ENSMUSG00000049225	4	11885331	11893599
Gm10604	ENSMUSG00000073995	4	11906707	11908412
Tmem67	ENSMUSG00000049488	4	11966502	12017167
C430048L16Rik	ENSMUSG00000052137	4	12016586	12023390
Rbm12b	ENSMUSG00000046667	4	12067411	12073878
Fam92a	ENSMUSG00000028218	4	12080556	12099162
Gm16652	ENSMUSG00000086492	4	11249091	11270100
Gm17454	ENSMUSG00000090438	4	11907816	11915618
Gm11814	ENSMUSG00000084215	4	10365962	10366890
1700123O12Rik	ENSMUSG00000086080	4	10407109	10724958
Gm11815	ENSMUSG00000086455	4	10415103	10416509
Gm11813	ENSMUSG00000081361	4	10507959	10508249
Gm12920	ENSMUSG00000083997	4	10740690	10741875
Gm12918	ENSMUSG00000066315	4	10775552	10776240
Gm12919	ENSMUSG00000083220	4	10780990	10782583
Gm11828	ENSMUSG00000081715	4	10873755	10874240
Gm11827	ENSMUSG00000086765	4	11049952	11054145
Gm11829	ENSMUSG00000083025	4	11060474	11060755
Gm11830	ENSMUSG00000081490	4	11071857	11072417
Gm11821	ENSMUSG00000081884	4	11327493	11328471
Gm11822	ENSMUSG00000082255	4	11347497	11347911
Gm11831	ENSMUSG00000086625	4	11428603	11429986
Gm11832	ENSMUSG00000086103	4	11538286	11542154
Gm11833	ENSMUSG00000084046	4	11576794	11577646
1700123M08Rik	ENSMUSG00000085614	4	11893712	11921427
Gm11840	ENSMUSG00000085027	4	11926621	11936190
Gm11842	ENSMUSG00000085467	4	11954652	11968041
Gm11839	ENSMUSG00000083246	4	12041431	12043383
Gm11841	ENSMUSG00000081593	4	12052437	12054399
Gm11843	ENSMUSG00000082676	4	12058698	12059122
AL772167.1	ENSMUSG00000080359	4	11876034	11876097
Mir3471-1	ENSMUSG00000092880	4	10772647	10772777
7SK	ENSMUSG00000084518	4	11855571	11855886
U1	ENSMUSG00000089185	4	11206412	11206566
Gm11847	ENSMUSG00000060989	4	12159927	12165171
Gm11846	ENSMUSG00000085909	4	12198546	12241730
Gm10598	ENSMUSG00000073883	4	41903740	41905449
Gm10597	ENSMUSG00000073882	4	41905836	41906261
Gm2442	ENSMUSG00000091938	4	41941480	41943464
Gm10596	ENSMUSG00000073880	4	41954088	41955014
Gm3893	ENSMUSG00000078744	4	41961930	41963010
Gm13304	ENSMUSG00000073878	4	41985540	41986640
Gm13306	ENSMUSG00000073877	4	42024159	42029562
Gm13305	ENSMUSG00000073876	4	42029565	42039326
1700045I11Rik	ENSMUSG00000091473	4	42041568	42042058
Gm10595	ENSMUSG00000073875	4	42090151	42090576
Gm10931	ENSMUSG00000078363	4	42214615	42216999
Gm1987	ENSMUSG00000078739	4	42231045	42232176
Gm2023	ENSMUSG00000078736	4	42248504	42250497
Gm10930	ENSMUSG00000078362	4	42285129	42290096
Gm2500	ENSMUSG00000078361	4	42336528	42337018
Gm2002	ENSMUSG00000078735	4	42339260	42349021
Gm2506	ENSMUSG00000078734	4	42349017	42354405
Ccl21c	ENSMUSG00000078732	4	42391951	42393082
Gm7819	ENSMUSG00000078731	4	42415576	42416656
Gm10929	ENSMUSG00000078360	4	42423572	42424498
Gm10594	ENSMUSG00000073873	4	42472325	42472750
4933409K07Rik	ENSMUSG00000073874	4	42473137	42474846
Gm2542	ENSMUSG00000078727	4	42536112	42541707
Gm10592	ENSMUSG00000073871	4	42594227	42595153
Gm2163	ENSMUSG00000078725	4	42602069	42603149
Gm10591	ENSMUSG00000073869	4	42625653	42626784
Ccl27b	ENSMUSG00000066202	4	42664149	42669537
Il11ra2	ENSMUSG00000066201	4	42668807	42679295
Gm9969	ENSMUSG00000055406	4	42681536	42682026
Gm10590	ENSMUSG00000073868	4	42728458	42733425
4930578G10Rik	ENSMUSG00000054885	4	42749077	42859120
Ccl19	ENSMUSG00000071005	4	42768057	42770109
Ccl21a	ENSMUSG00000071003	4	42786392	42787525
Gm12394	ENSMUSG00000078722	4	42795460	42869643
Gm12429	ENSMUSG00000078721	4	42860943	42866760
BC049635	ENSMUSG00000050141	4	42880876	42887106
N28178	ENSMUSG00000036062	4	42929532	42957624
Dnajb5	ENSMUSG00000036052	4	42962686	42972297
1700022I11Rik	ENSMUSG00000028451	4	42982818	42996511
Vcp	ENSMUSG00000028452	4	42992835	43013379
Fancg	ENSMUSG00000028453	4	43015215	43023378
Pigo	ENSMUSG00000028454	4	43030507	43038691
Stoml2	ENSMUSG00000028455	4	43040562	43044582
B230312A22Rik	ENSMUSG00000036002	4	43045286	43059092
Unc13b	ENSMUSG00000028456	4	43071825	43277745
Atp8b5	ENSMUSG00000028457	4	43280031	43386705
Rusc2	ENSMUSG00000035969	4	43394851	43439960
Fam166b	ENSMUSG00000042788	4	43439891	43442006
Tesk1	ENSMUSG00000028458	4	43454811	43460936
Cd72	ENSMUSG00000028459	4	43459334	43467500
Sit1	ENSMUSG00000028460	4	43494953	43496606
Ccdc107	ENSMUSG00000028461	4	43505772	43508793
E130306D19Rik	ENSMUSG00000051517	4	43509014	43512567
Car9	ENSMUSG00000028463	4	43519838	43526601
Tpm2	ENSMUSG00000028464	4	43527583	43536637
Tln1	ENSMUSG00000028465	4	43544391	43575563
Creb3	ENSMUSG00000028466	4	43575204	43579932
Gba2	ENSMUSG00000028467	4	43579800	43591745
Rgp1	ENSMUSG00000028468	4	43591587	43600359
Msmp	ENSMUSG00000078719	4	43596088	43597366
Npr2	ENSMUSG00000028469	4	43644807	43664116
Spag8	ENSMUSG00000066196	4	43664207	43666466
Hint2	ENSMUSG00000028470	4	43667099	43669338
4930412F15Rik	ENSMUSG00000043633	4	43672494	43682017
Tmem8b	ENSMUSG00000078716	4	43681843	43705540
Olfr70	ENSMUSG00000050215	4	43707872	43713679
Olfr71	ENSMUSG00000046450	4	43718500	43723103
Hrct1	ENSMUSG00000071001	4	43740070	43741511
Olfr159	ENSMUSG00000044801	4	43782922	43783881
Olfr156	ENSMUSG00000059448	4	43833207	43834305
Olfr157	ENSMUSG00000059101	4	43847624	43849389
Olfr155	ENSMUSG00000071000	4	43864437	43868335
Gm17599	ENSMUSG00000091065	4	43043871	43045354
Olfr269-ps1	ENSMUSG00000083417	4	43780348	43780649
Olfr29-ps1	ENSMUSG00000081420	4	43794253	43795200
Gm12492	ENSMUSG00000081329	4	43811768	43813127
Gm16972	ENSMUSG00000086983	4	43058906	43066125
Gm13303	ENSMUSG00000082414	4	41896152	41897435
Gm3892	ENSMUSG00000073881	4	41925875	41960431
Gm13299	ENSMUSG00000087577	4	41992336	42024158
Ccl19-ps3	ENSMUSG00000084036	4	42003282	42004894
Gm17167	ENSMUSG00000091542	4	42077721	42106036
Gm13301	ENSMUSG00000083929	4	42087631	42104185
Gm13300	ENSMUSG00000081989	4	42104736	42107058
Gm5859	ENSMUSG00000073879	4	42107582	42109905
Gm17081	ENSMUSG00000090338	4	42110448	42110925
Gm7819	ENSMUSG00000078729	4	42418155	42452715
Gm13309	ENSMUSG00000083726	4	42435300	42436901
Gm10593	ENSMUSG00000073872	4	42566010	42600570
Gm12395	ENSMUSG00000085910	4	42750125	42751626
Gm12454	ENSMUSG00000087142	4	43517300	43521619
Gm12472	ENSMUSG00000085351	4	43600944	43621627
Gm12473	ENSMUSG00000086043	4	43644411	43654405
Gm12481	ENSMUSG00000043770	4	43676833	43677211
5430416O09Rik	ENSMUSG00000028475	4	43742906	43747406
A630077J23Rik	ENSMUSG00000086864	4	43768995	43772336
5S_rRNA	ENSMUSG00000088947	4	43705558	43705689
AL732626.1	ENSMUSG00000092675	4	43644297	43644429
U7	ENSMUSG00000089028	4	43214021	43214085
RNase_MRP	ENSMUSG00000088088	4	43505660	43505930
SNORA17	ENSMUSG00000077552	4	43149371	43149500
Reck	ENSMUSG00000028476	4	43888402	43957678
Glipr2	ENSMUSG00000028480	4	43970273	43991990
Ccin	ENSMUSG00000070999	4	43996376	43998405
Clta	ENSMUSG00000028478	4	44017324	44045718
Gne	ENSMUSG00000028479	4	44046947	44097049
Rnf38	ENSMUSG00000035696	4	44139082	44246661
Gm12503	ENSMUSG00000087326	4	44105504	44122183
Gm12504	ENSMUSG00000084274	4	44134765	44136995
U1	ENSMUSG00000088532	4	44094161	44094272
Mir5106	ENSMUSG00000092677	4	44234067	44234139
Melk	ENSMUSG00000035683	4	44313748	44377547
Gm12677	ENSMUSG00000081127	4	44326299	44326930
Gm12455	ENSMUSG00000083803	4	44395794	44396209
SNORA17	ENSMUSG00000077587	4	44425341	44425467
Pax5	ENSMUSG00000014030	4	44544017	44724318
Mir5120	ENSMUSG00000092761	4	44620363	44620440
Gm12462	ENSMUSG00000086211	4	44677287	44698219
Zcchc7	ENSMUSG00000035649	4	44768749	44945087
Gm12463	ENSMUSG00000080916	4	44765149	44765997
AL805896.1	ENSMUSG00000093332	4	44878179	44878303
Gm12678	ENSMUSG00000084854	4	44956625	44961202
Tusc1	ENSMUSG00000054000	4	93000839	93002202
5830433M19Rik	ENSMUSG00000028578	4	94166772	94223487
Gm10306	ENSMUSG00000070900	4	94223237	94223769
Plaa	ENSMUSG00000028577	4	94234205	94269935
Gm12639	ENSMUSG00000081987	4	92636935	92637427
Gm12641	ENSMUSG00000082919	4	92773679	92776605
Gm12642	ENSMUSG00000082325	4	92932104	92932979
Gm12649	ENSMUSG00000084833	4	93119949	93337761
Gm12640	ENSMUSG00000083607	4	93265877	93266186
Gm12650	ENSMUSG00000073797	4	93469024	93469281
Gm12651	ENSMUSG00000083724	4	93570715	93571161
Gm12647	ENSMUSG00000081685	4	93728064	93728328
Gm12648	ENSMUSG00000085931	4	93756267	94092279
Gm12654	ENSMUSG00000081508	4	94062349	94062935
Gm12655	ENSMUSG00000087128	4	94127622	94143871
Gm12656	ENSMUSG00000083359	4	94163723	94164299
Gm12657	ENSMUSG00000063314	4	94260341	94267001
SNORA2	ENSMUSG00000088677	4	94154574	94154674
U6	ENSMUSG00000077195	4	93267670	93267776
U6	ENSMUSG00000088914	4	92533166	92533273
SNORA61	ENSMUSG00000064850	4	93211841	93211968
SNORA61	ENSMUSG00000077622	4	93764981	93765109
7SK	ENSMUSG00000088295	4	94100915	94101175
AL833773.1	ENSMUSG00000077037	4	93405427	93405536
Ift74	ENSMUSG00000028576	4	94281182	94359920
Lrrc19	ENSMUSG00000049799	4	94303344	94316835
Gm17636	ENSMUSG00000091804	4	94318600	94323162
Tek	ENSMUSG00000006386	4	94405980	94541667
4930579C15Rik	ENSMUSG00000028575	4	94573958	94595534
Mysm1	ENSMUSG00000062627	4	94608731	94645791
Jun	ENSMUSG00000052684	4	94715725	94718913
Fggy	ENSMUSG00000028573	4	95224198	95593630
Hook1	ENSMUSG00000028572	4	95633931	95692104
Gm12693	ENSMUSG00000083179	4	94602312	94602794
Gm12694	ENSMUSG00000086251	4	94645894	94695235
Gm12703	ENSMUSG00000052767	4	94696654	94715061
Gm12704	ENSMUSG00000081030	4	94705853	94706316
BC042782	ENSMUSG00000087366	4	94718225	94834009
4930551L18Rik	ENSMUSG00000085377	4	94755774	94758110
Gm12708	ENSMUSG00000084918	4	94860004	94876418
Gm830	ENSMUSG00000084939	4	95131415	95154085
Gm12707	ENSMUSG00000085835	4	95150647	95154092
RP23-356F8.3	ENSMUSG00000093492	4	95228522	95228850
9530080O11Rik	ENSMUSG00000044125	4	95626406	95634346
n-R5s189	ENSMUSG00000084624	4	94729341	94729454
U1	ENSMUSG00000065745	4	95190735	95190895
Mir872	ENSMUSG00000077921	4	94331848	94331928
Cyp2j13	ENSMUSG00000028571	4	95694225	95744237
Cyp2j12	ENSMUSG00000081225	4	95766009	95807843
Cyp2j7-ps	ENSMUSG00000081362	4	95861888	95903350
Cyp2j11	ENSMUSG00000066097	4	95961199	96015353
Cyp2j8	ENSMUSG00000082932	4	96111287	96174077
Cyp2j6	ENSMUSG00000052914	4	96182829	96220352
Cyp2j9	ENSMUSG00000015224	4	96235120	96258269
Cyp2j5	ENSMUSG00000052520	4	96295464	96330845
Gm12695	ENSMUSG00000078639	4	96390338	96451877
Hspe1-ps6	ENSMUSG00000083880	4	95739115	95739397
Gm12674	ENSMUSG00000080884	4	95818344	95818549
Gm12673	ENSMUSG00000083801	4	95836898	95837076
Gm12675	ENSMUSG00000082681	4	95856762	95856934
Gm12658	ENSMUSG00000084286	4	95912251	95940961
Gm12659	ENSMUSG00000082119	4	96023002	96046902
Gm10192	ENSMUSG00000066990	4	96849531	96849857
E130114P18Rik	ENSMUSG00000048747	4	97234824	97444769
Nfia	ENSMUSG00000028565	4	97439425	97868605
Gm12696	ENSMUSG00000084159	4	97188119	97189023
Gm12697	ENSMUSG00000082683	4	97223095	97223761
Gm12676	ENSMUSG00000085710	4	97420859	97424080
Tm2d1	ENSMUSG00000028563	4	98022061	98049997
Inadl	ENSMUSG00000061859	4	98062476	98386294
Gm12691	ENSMUSG00000081096	4	97812835	97813290
Gm12692	ENSMUSG00000082388	4	97901436	97901981
Gm12787	ENSMUSG00000083644	4	97934774	97935266
0610025J13Rik	ENSMUSG00000046683	4	97988089	97998482
Gm12788	ENSMUSG00000082144	4	98019118	98019425
Y_RNA	ENSMUSG00000064883	4	97942416	97942529
U6	ENSMUSG00000088548	4	98050093	98050182
AL671140.1	ENSMUSG00000093135	4	98025885	98025994
Tie1	ENSMUSG00000033191	4	118143796	118162666
2610528J11Rik	ENSMUSG00000028536	4	118199604	118202833
Tmem125	ENSMUSG00000050854	4	118213546	118216649
Wdr65	ENSMUSG00000028730	4	118227156	118293382
Ebna1bp2	ENSMUSG00000028729	4	118293404	118300381
Olfr62	ENSMUSG00000043698	4	118338124	118339072
Olfr1342	ENSMUSG00000043383	4	118362067	118363068
Olfr1341	ENSMUSG00000046790	4	118381015	118382952
Olfr1340	ENSMUSG00000070821	4	118398854	118399804
Olfr1339	ENSMUSG00000070820	4	118407136	118408083
Olfr1338	ENSMUSG00000066063	4	118426200	118427141
Olfr1337	ENSMUSG00000061075	4	118454241	118455188
Olfr1335	ENSMUSG00000066061	4	118481402	118482549
Olfr1333	ENSMUSG00000073770	4	118502090	118508878
Olfr1331	ENSMUSG00000073769	4	118537263	118542341
Olfr1330	ENSMUSG00000073768	4	118565690	118566637
Olfr1329	ENSMUSG00000073767	4	118589129	118590070
Olfr1328	ENSMUSG00000073766	4	118606504	118607445
Lao1	ENSMUSG00000024903	4	118634183	118641517
Slc2a1	ENSMUSG00000028645	4	118781316	118809935
Zfp691	ENSMUSG00000045268	4	118842118	118846800
Ermap	ENSMUSG00000028644	4	118848062	118862616
Ccdc23	ENSMUSG00000028643	4	118867911	118873903
AU022252	ENSMUSG00000078584	4	118876175	118905317
4930538K18Rik	ENSMUSG00000028642	4	118877712	118890822
Lepre1	ENSMUSG00000028641	4	118905520	118921580
Cldn19	ENSMUSG00000066058	4	118928019	118935043
Ybx1	ENSMUSG00000028639	4	118950586	118967209
Ppih	ENSMUSG00000060288	4	118972615	118993151
Ccdc30	ENSMUSG00000028637	4	118995498	119088126
Ppcs	ENSMUSG00000028636	4	119091135	119095025
Zmynd12	ENSMUSG00000070806	4	119095419	119140049
Rimkla	ENSMUSG00000048899	4	119137888	119165233
AA415398	ENSMUSG00000087385	4	119202913	119212134
Foxj3	ENSMUSG00000032998	4	119209609	119301724
Guca2a	ENSMUSG00000023247	4	119310309	119312076
Guca2b	ENSMUSG00000032978	4	119329212	119331559
Hivep3	ENSMUSG00000028634	4	119406389	119810650
Hivep3	ENSMUSG00000078582	4	119406401	119409373
Hivep3	ENSMUSG00000091688	4	119487167	119545940
Edn2	ENSMUSG00000028635	4	119833811	119839965
Foxo6	ENSMUSG00000052135	4	119939684	119959954
Scmh1	ENSMUSG00000000085	4	120077886	120202804
Gm12859	ENSMUSG00000080857	4	118163387	118170247
Gm12857	ENSMUSG00000081233	4	118194623	118195214
Gm12853	ENSMUSG00000085292	4	118305452	118308667
Olfr1343-ps1	ENSMUSG00000086521	4	118345214	118346127
Gm12855	ENSMUSG00000081474	4	118463686	118464198
Olfr1332-ps1	ENSMUSG00000083336	4	118526697	118527650
Gm12856	ENSMUSG00000084133	4	118614665	118615957
Gm12863	ENSMUSG00000073765	4	118626879	118627524
Gm12861	ENSMUSG00000085895	4	118643902	118672063
Gm12865	ENSMUSG00000087238	4	118656663	118669803
Gm12864	ENSMUSG00000082143	4	118659619	118660624
Gm12862	ENSMUSG00000087464	4	118672265	118673090
Gm12866	ENSMUSG00000066060	4	118727395	118741716
Gm12867	ENSMUSG00000086683	4	118802897	118803606
Gm12868	ENSMUSG00000085505	4	118806354	118811406
Gm12898	ENSMUSG00000085626	4	118895779	118897420
Gm12927	ENSMUSG00000085203	4	118925127	118929580
Ldha-ps2	ENSMUSG00000083836	4	119006994	119008050
Gm12954	ENSMUSG00000082009	4	119174470	119175151
Gm12956	ENSMUSG00000082814	4	119182253	119182666
Gm12955	ENSMUSG00000080773	4	119191731	119192687
Gm12957	ENSMUSG00000084379	4	119193595	119193971
Gm12959	ENSMUSG00000081678	4	119226261	119226663
4732418A04Rik	ENSMUSG00000084929	4	119963955	119976497
SNORA17	ENSMUSG00000089591	4	118652923	118653047
BX470216.1	ENSMUSG00000092987	4	119078639	119078845
U6	ENSMUSG00000065240	4	119200605	119200711
Mir1957	ENSMUSG00000088552	4	118802384	118802449
Slfnl1	ENSMUSG00000047518	4	120204836	120209266
Ctps	ENSMUSG00000028633	4	120212473	120242881
Gm8439	ENSMUSG00000091297	4	120261350	120282278
Cited4	ENSMUSG00000070803	4	120339168	120340425
Kcnq4	ENSMUSG00000028631	4	120368743	120421217
Nfyc	ENSMUSG00000032897	4	120430043	120504177
Rims3	ENSMUSG00000032890	4	120527421	120569184
Dem1	ENSMUSG00000028629	4	120593801	120597622
Zfp69	ENSMUSG00000064141	4	120602742	120624304
Smap2	ENSMUSG00000032870	4	120640922	120689852
Col9a2	ENSMUSG00000028626	4	120711990	120727927
Zmpste24	ENSMUSG00000043207	4	120731842	120770846
Tmco2	ENSMUSG00000078577	4	120778256	120781831
Rlf	ENSMUSG00000049878	4	120817978	120887689
Gm12860	ENSMUSG00000086187	4	120288445	120295287
Gm12871	ENSMUSG00000082200	4	120573828	120574265
Gm12882	ENSMUSG00000081423	4	120787394	120787910
Gm12881	ENSMUSG00000082891	4	120793479	120793901
Gm12879	ENSMUSG00000081305	4	120802723	120803904
Gm12890	ENSMUSG00000080706	4	120899706	120900078
SNORA18	ENSMUSG00000088314	4	120748403	120748527
U1	ENSMUSG00000088168	4	120756591	120756754
AL606904.1	ENSMUSG00000077100	4	120510093	120510202
Mir30e	ENSMUSG00000065409	4	120445211	120445302
Mir30c-1	ENSMUSG00000065490	4	120442139	120442227
7SK	ENSMUSG00000064547	4	120807262	120807580
U6	ENSMUSG00000089381	4	120576065	120576168
Fam193a	ENSMUSG00000037210	5	34713062	34829104
Tnip2	ENSMUSG00000059866	5	34838736	34856646
Sh3bp2	ENSMUSG00000054520	5	34868487	34906274
Add1	ENSMUSG00000029106	5	34916313	34974957
Mfsd10	ENSMUSG00000001082	5	34976291	34979861
Nop14	ENSMUSG00000036693	5	34981181	35002797
Grk4	ENSMUSG00000052783	5	35003028	35097954
Htt	ENSMUSG00000029104	5	35104389	35255183
A930005I04Rik	ENSMUSG00000051246	5	35258564	35266488
Rgs12	ENSMUSG00000029101	5	35292094	35382293
Hgfac	ENSMUSG00000029102	5	35384202	35391085
Dok7	ENSMUSG00000044716	5	35399462	35430488
Lrpap1	ENSMUSG00000029103	5	35434139	35448415
Adra2c	ENSMUSG00000045318	5	35621215	35624410
E130018O15Rik	ENSMUSG00000055944	5	35721801	35731125
Hmx1	ENSMUSG00000067438	5	35731507	35742379
Cpz	ENSMUSG00000036596	5	35844864	35868347
2310079F23Rik	ENSMUSG00000029097	5	35899855	35917719
Acox3	ENSMUSG00000029098	5	35925689	35958001
Htra3	ENSMUSG00000029096	5	35994682	36022431
Sh3tc1	ENSMUSG00000036553	5	36039829	36071925
Ablim2	ENSMUSG00000029095	5	36100529	36227622
Afap1	ENSMUSG00000029094	5	36235968	36346572
Sorcs2	ENSMUSG00000029093	5	36359829	36740788
Psapl1	ENSMUSG00000043430	5	36546670	36549217
Grpel1	ENSMUSG00000029198	5	36807647	36816729
Gm15522	ENSMUSG00000085166	5	34993367	34995126
4931431C16Rik	ENSMUSG00000055061	5	35923876	35931412
Gm15650	ENSMUSG00000087703	5	36065204	36067134
Gm15652	ENSMUSG00000082692	5	36260546	36260850
2210406O10Rik	ENSMUSG00000039563	5	36790260	36807502
A930033C23Rik	ENSMUSG00000093526	5	35739468	35742668
Plk-ps1	ENSMUSG00000083907	5	35896833	35898620
Mir467g	ENSMUSG00000080556	5	35075502	35075621
Mir3097	ENSMUSG00000093097	5	35363698	35363764
U1	ENSMUSG00000088332	5	34873298	34873402
Tada2b	ENSMUSG00000029196	5	36816319	36826934
Ccdc96	ENSMUSG00000050677	5	36827237	36830820
Tbc1d14	ENSMUSG00000029192	5	36833253	36935925
Rab28	ENSMUSG00000029128	5	42016215	42099394
Nkx3-2	ENSMUSG00000049691	5	42152404	42155735
Bod1l	ENSMUSG00000061755	5	42178781	42235407
Gm16223	ENSMUSG00000067285	5	42459199	42608037
Cpeb2	ENSMUSG00000039782	5	43624702	43680963
Gm7854	ENSMUSG00000085720	5	43626241	43626591
U7	ENSMUSG00000088452	5	43852424	43852479
C1qtnf7	ENSMUSG00000061535	5	43906808	44010056
Gm15865	ENSMUSG00000085529	5	43941169	43949008
Cc2d2a	ENSMUSG00000039765	5	44053618	44132211
Gm15866	ENSMUSG00000087290	5	43948524	43992969
Fbxl5	ENSMUSG00000039753	5	44135855	44212878
Bst1	ENSMUSG00000029082	5	44210125	44234510
Cd38	ENSMUSG00000029084	5	44260048	44303614
Gm16014	ENSMUSG00000086479	5	44267275	44268543
Gm16015	ENSMUSG00000087281	5	44300454	44301124
Gm7879	ENSMUSG00000033036	5	44304412	44304945
Gm5292	ENSMUSG00000059565	5	44335141	44335722
Fgfbp1	ENSMUSG00000048373	5	44370104	44373001
Prom1	ENSMUSG00000029086	5	44384864	44493271
Gm16401	ENSMUSG00000072962	5	44491681	44493752
Tapt1	ENSMUSG00000046985	5	44566403	44617845
Ldb2	ENSMUSG00000039706	5	44863372	45190946
4930431F12Rik	ENSMUSG00000062496	5	45357822	45359106
Gm10205	ENSMUSG00000067331	5	45375100	45375481
Msi1	ENSMUSG00000054256	5	115879608	115905707
4930430O22Rik	ENSMUSG00000057354	5	115886077	115886615
Pla2g1b	ENSMUSG00000029522	5	115916271	115924731
Sirt4	ENSMUSG00000029524	5	115928019	115934734
Pxn	ENSMUSG00000029528	5	115956685	116005996
Rplp0	ENSMUSG00000067274	5	116009476	116013736
Gcn1l1	ENSMUSG00000041638	5	116015263	116072665
Rab35	ENSMUSG00000029518	5	116081938	116097745
Ccdc64	ENSMUSG00000041609	5	116098184	116181630
Cit	ENSMUSG00000029516	5	116295287	116458956
Prkab1	ENSMUSG00000029513	5	116463595	116474517
Tmem233	ENSMUSG00000079278	5	116488764	116533253
Ccdc60	ENSMUSG00000043913	5	116574650	116738994
Hspb8	ENSMUSG00000041548	5	116858500	116872873
Srrm4	ENSMUSG00000063919	5	116889281	117041826
Gstm2-ps1	ENSMUSG00000091578	5	117082917	117083471
4930569F06Rik	ENSMUSG00000041512	5	117271463	117271895
Suds3	ENSMUSG00000066900	5	117541691	117566002
Taok3	ENSMUSG00000061288	5	117570138	117725228
Pebp1	ENSMUSG00000032959	5	117732660	117737634
Gm10399	ENSMUSG00000072688	5	117768754	117769251
Vsig10	ENSMUSG00000066894	5	117769275	117805014
Wsb2	ENSMUSG00000029364	5	117807313	117828610
Gm13832	ENSMUSG00000087292	5	115809087	115872872
Gm13836	ENSMUSG00000081282	5	115941900	115942464
Gm13840	ENSMUSG00000086849	5	115965272	115965956
Gm13841	ENSMUSG00000083833	5	116251568	116252219
Gm14508	ENSMUSG00000085376	5	116459325	116466114
Gm13842	ENSMUSG00000084992	5	116476420	116479239
Gm17420	ENSMUSG00000090728	5	116482155	116482322
C330018A13Rik	ENSMUSG00000086655	5	116573623	116579119
Gm14507	ENSMUSG00000086122	5	116693715	116704962
Gm13837	ENSMUSG00000086055	5	116707670	116708653
Gm13839	ENSMUSG00000087124	5	116751309	116753523
Gm13838	ENSMUSG00000084921	5	116755691	116759369
B230112J18Rik	ENSMUSG00000086715	5	116762369	116768290
4930562A09Rik	ENSMUSG00000086945	5	116840687	116842809
2410137F16Rik	ENSMUSG00000086219	5	116888729	116915496
9530046B11Rik	ENSMUSG00000086047	5	117565227	117568732
Gm15727	ENSMUSG00000081274	5	117798916	117799353
BC051077	ENSMUSG00000091333	5	117762529	117765548
n-R5s174	ENSMUSG00000084587	5	117646564	117646684
U4	ENSMUSG00000075998	5	115939468	115939608
U4	ENSMUSG00000075779	5	115940263	115940403
Rfc5	ENSMUSG00000029363	5	117828112	117839056
Gm15728	ENSMUSG00000086075	5	117839148	117843507
Gatsl2	ENSMUSG00000015944	5	134575581	134620213
Wbscr16	ENSMUSG00000061979	5	134623924	134652644
Gtf2ird2	ENSMUSG00000015942	5	134659889	134700225
Ncf1	ENSMUSG00000015950	5	134695923	134705495
Gtf2i	ENSMUSG00000060261	5	134713704	134790630
Gtf2ird1	ENSMUSG00000023079	5	134833539	134932581
Clip2	ENSMUSG00000063146	5	134965256	135028304
Syna	ENSMUSG00000085957	5	135034016	135036041
Rfc2	ENSMUSG00000023104	5	135058560	135074198
Lat2	ENSMUSG00000040751	5	135076138	135090893
Eif4h	ENSMUSG00000040731	5	135095747	135115218
Limk1	ENSMUSG00000029674	5	135131909	135164460
Gm10369	ENSMUSG00000072573	5	135152360	135156015
Eln	ENSMUSG00000029675	5	135179651	135223111
Wbscr28	ENSMUSG00000040576	5	135377464	135382603
Cldn13	ENSMUSG00000008843	5	135390119	135391396
Wbscr27	ENSMUSG00000040557	5	135408238	135418507
Cldn4	ENSMUSG00000047501	5	135420996	135422804
Cldn3	ENSMUSG00000070473	5	135462084	135463342
Abhd11	ENSMUSG00000040532	5	135485022	135488045
Stx1a	ENSMUSG00000007207	5	135499352	135526970
Wbscr22	ENSMUSG00000005378	5	135528827	135540829
Dnajc30	ENSMUSG00000061118	5	135540076	135541235
Vps37d	ENSMUSG00000043614	5	135548770	135554136
Mlxipl	ENSMUSG00000005373	5	135582761	135614254
Tbl2	ENSMUSG00000005374	5	135625527	135639743
Bcl7b	ENSMUSG00000029681	5	135644153	135657725
Baz1b	ENSMUSG00000002748	5	135663134	135721999
Fzd9	ENSMUSG00000049551	5	135724808	135727100
Fkbp6	ENSMUSG00000040013	5	135767574	135825895
Trim50	ENSMUSG00000053388	5	135829165	135843875
Nsun5	ENSMUSG00000000916	5	135845823	135852675
Pom121	ENSMUSG00000053293	5	135852011	135870416
Hip1	ENSMUSG00000039959	5	135882393	136020992
Ccl26	ENSMUSG00000070464	5	136036318	136039439
Ccl24	ENSMUSG00000004814	5	136045807	136048913
Rhbdd2	ENSMUSG00000039917	5	136108488	136122318
Por	ENSMUSG00000005514	5	136145903	136211196
Tmem120a	ENSMUSG00000039886	5	136211355	136220141
Styxl1	ENSMUSG00000019178	5	136223090	136254255
Mdh2	ENSMUSG00000019179	5	136254350	136266268
Srrm3	ENSMUSG00000039860	5	136282760	136350642
Hspb1	ENSMUSG00000004951	5	136363789	136365433
Ywhag	ENSMUSG00000051391	5	136384279	136410486
Srcrb4d	ENSMUSG00000029699	5	136436081	136450401
Zp3	ENSMUSG00000004948	5	136455969	136464494
Dtx2	ENSMUSG00000004947	5	136470670	136508742
Upk3b	ENSMUSG00000042985	5	136514366	136521173
2310043J07Rik	ENSMUSG00000006143	5	136530362	136540196
Rasa4	ENSMUSG00000004952	5	136559786	136587730
Gm16020	ENSMUSG00000072576	5	134939086	134939395
Wbscr25	ENSMUSG00000054909	5	135463303	135477220
Gm15757	ENSMUSG00000084392	5	135482447	135482618
2010001M06Rik	ENSMUSG00000085042	5	135487984	135489123
Gm15607	ENSMUSG00000082001	5	136113009	136113366
Gm16061	ENSMUSG00000080972	5	136174033	136174889
4930521C21Rik	ENSMUSG00000085026	5	136318927	136320816
Gm15701	ENSMUSG00000086656	5	136578474	136580306
Mir3965	ENSMUSG00000093311	5	134802324	134802392
AC093346.1	ENSMUSG00000092941	5	134769857	134770152
AC158379.1	ENSMUSG00000092991	5	134677736	134678021
AC167419.1	ENSMUSG00000076320	5	134924444	134924542
AC084162.1	ENSMUSG00000092803	5	136313165	136313242
SCARNA20	ENSMUSG00000088008	5	135529858	135529986
U12	ENSMUSG00000088188	5	136572130	136572301
AC024607.1	ENSMUSG00000080473	5	135683858	135683978
n-R5s178	ENSMUSG00000077437	5	134892109	134892222
U6	ENSMUSG00000064651	5	136351527	136351633
7SK	ENSMUSG00000084729	5	134680339	134680626
Gsx1	ENSMUSG00000053129	5	148000272	148002523
Gm17398	ENSMUSG00000091377	5	148211130	148213493
Pdx1	ENSMUSG00000029644	5	148081535	148089584
Cdx2	ENSMUSG00000029646	5	148112381	148118846
Prhoxnb	ENSMUSG00000075543	5	148126562	148134016
Flt3	ENSMUSG00000042817	5	148142317	148212065
Pan3	ENSMUSG00000029647	5	148241737	148360078
Flt1	ENSMUSG00000029648	5	148373180	148537587
Pomp	ENSMUSG00000029649	5	148672204	148687354
Slc46a3	ENSMUSG00000029650	5	148690013	148706391
Mtus2	ENSMUSG00000029651	5	148768896	149127641
Slc7a1	ENSMUSG00000041313	5	149138986	149211480
Mtif3	ENSMUSG00000016510	5	147763149	147775376
Lnx2	ENSMUSG00000016520	5	147828231	147888162
Polr1d	ENSMUSG00000029642	5	147888626	147922937
Gm15633	ENSMUSG00000083988	5	147912138	147912629
2210019I11Rik	ENSMUSG00000092570	5	148040172	148083097
Gm6054	ENSMUSG00000057157	5	148220558	148220935
Gm15721	ENSMUSG00000085565	5	148761458	148768742
Gm10167	ENSMUSG00000066554	5	148994475	148995953
Gm6370	ENSMUSG00000079094	5	147302938	147305530
4930449I24Rik	ENSMUSG00000079093	5	147314004	147316759
Gm3402	ENSMUSG00000041505	5	147325701	147328300
Gm3404	ENSMUSG00000079091	5	147337377	147340129
Gm3409	ENSMUSG00000079090	5	147349252	147351825
Gm3415	ENSMUSG00000079089	5	147367740	147370313
Gpr12	ENSMUSG00000041468	5	147393727	147396815
Usp12	ENSMUSG00000029640	5	147546385	147606582
Rpl21	ENSMUSG00000041453	5	147644466	147648608
Rasl11a	ENSMUSG00000029641	5	147656647	147659302
Gm10858	ENSMUSG00000075546	5	147705790	147708726
Gtf3a	ENSMUSG00000016503	5	147760233	147767190
SNORA17	ENSMUSG00000077735	5	148011700	148011829
SNORD102	ENSMUSG00000077185	5	147646410	147646480
SNORA27	ENSMUSG00000077564	5	147646720	147646848
Ubl3	ENSMUSG00000001687	5	149316207	149364365
Katnal1	ENSMUSG00000041298	5	149685908	149806799
8430423G03Rik	ENSMUSG00000079069	5	149761826	149763234
Gm15409	ENSMUSG00000087272	5	149770854	149773288
2210417A02Rik	ENSMUSG00000086494	5	149553416	149554715
4930505K14Rik	ENSMUSG00000085740	5	149589539	149594656
Gm15407	ENSMUSG00000087647	5	149632343	149640984
Gm15410	ENSMUSG00000085639	5	149758168	149760442
Gm15406	ENSMUSG00000085237	5	149760473	149808142
1810059H22Rik	ENSMUSG00000085455	5	149765324	149781698
Gm15411	ENSMUSG00000085971	5	149807227	149827389
Gm15408	ENSMUSG00000086610	5	149818538	149824352
n-R5s179	ENSMUSG00000084513	5	149564899	149565016
5730422E09Rik	ENSMUSG00000086085	5	149931141	149995639
Hmgb1	ENSMUSG00000066551	5	149858278	149865089
Uspl1	ENSMUSG00000041264	5	149995926	150027010
Alox5ap	ENSMUSG00000060063	5	150076634	150099621
6330406I15Rik	ENSMUSG00000029659	5	150171051	150234298
4930588N13Rik	ENSMUSG00000029660	5	150242281	150273195
Gm8615	ENSMUSG00000024437	5	149967022	149967657
BC028471	ENSMUSG00000075529	5	150170211	150196171
Gm20488	ENSMUSG00000092327	5	150171051	150233257
Gm15997	ENSMUSG00000086744	5	150291631	150340605
n-R5s180	ENSMUSG00000064704	5	150092694	150092799
AC122546.1	ENSMUSG00000092674	5	150059530	150059820
AC122546.2	ENSMUSG00000092764	5	149957300	149957397
Gm2566	ENSMUSG00000082959	5	150305082	150305622
Wdr95	ENSMUSG00000029658	5	150331254	150414470
Hsph1	ENSMUSG00000029657	5	150416862	150438951
Gm5566	ENSMUSG00000080002	5	150463340	150463798
B3galtl	ENSMUSG00000051950	5	150480805	150565174
Rxfp2	ENSMUSG00000053368	5	150821250	150884759
Fry	ENSMUSG00000056602	5	150921242	151300327
snoU13	ENSMUSG00000087984	5	151290734	151290835
Gm15933	ENSMUSG00000082104	5	151312269	151313913
Zar1l	ENSMUSG00000056586	5	151309630	151320739
Brca2	ENSMUSG00000041147	5	151325205	151372321
N4bp2l1	ENSMUSG00000041132	5	151374218	151397100
N4bp2l2	ENSMUSG00000029655	5	151410582	151468187
Pds5b	ENSMUSG00000034021	5	151476314	151613265
U4	ENSMUSG00000075784	5	151349888	151350028
U6	ENSMUSG00000088482	5	151354282	151354382
U6	ENSMUSG00000084717	5	151510619	151510724
SNORA17	ENSMUSG00000077592	5	151513421	151513539
U3	ENSMUSG00000087709	5	151715675	151715788
Kl	ENSMUSG00000058488	5	151755182	151796384
Stard13	ENSMUSG00000016128	5	151840203	152036411
Xpc	ENSMUSG00000030094	6	91439299	91465878
Fbln2	ENSMUSG00000064080	6	91162449	91222534
Ccdc37	ENSMUSG00000048794	6	90353730	90378791
Vmn1r53	ENSMUSG00000057697	6	90173311	90174432
4930471M09Rik	ENSMUSG00000085727	6	91380454	91390848
4930590J08Rik	ENSMUSG00000034063	6	91864753	91900634
Fgd5	ENSMUSG00000034037	6	91928872	92025998
Gm20426	ENSMUSG00000092247	6	90181722	90182782
Vmn1r54	ENSMUSG00000047203	6	90219100	90220047
BC048671	ENSMUSG00000049694	6	90251213	90255443
Chst13	ENSMUSG00000056643	6	90258345	90275179
Uroc1	ENSMUSG00000034456	6	90283283	90314545
Zxdc	ENSMUSG00000034430	6	90319486	90353484
Slc41a3	ENSMUSG00000030089	6	90554719	90596406
Iqsec1	ENSMUSG00000034312	6	90609592	90760117
Rpl21-ps12	ENSMUSG00000057370	6	90794972	90795454
Nup210	ENSMUSG00000030091	6	90963062	91066823
C130022K22Rik	ENSMUSG00000034083	6	91828047	91849842
Gm4287	ENSMUSG00000092552	6	90185683	90186267
Vmn1r-ps34	ENSMUSG00000068228	6	90192266	90193237
Gm15756	ENSMUSG00000089781	6	90546679	90549942
Ppp1r2-ps2	ENSMUSG00000072894	6	90855693	90856501
Gm14573	ENSMUSG00000085624	6	91108707	91109250
Lsm3	ENSMUSG00000034192	6	91465951	91469829
4930466I24Rik	ENSMUSG00000087317	6	91962388	91966111
Nr2c2	ENSMUSG00000005893	6	92041384	92123051
Mrps25	ENSMUSG00000014551	6	92119519	92134027
Zfyve20	ENSMUSG00000014550	6	92136706	92164919
Wnt7a	ENSMUSG00000030093	6	91313975	91361357
Chchd4	ENSMUSG00000034203	6	91414270	91423417
Tmem43	ENSMUSG00000030095	6	91423697	91438453
Klf15	ENSMUSG00000030087	6	90412570	90425232
Aldh1l1	ENSMUSG00000030088	6	90436421	90550197
Lsm3	ENSMUSG00000090846	6	91466029	91472614
Slc6a6	ENSMUSG00000030096	6	91634061	91709057
Grip2	ENSMUSG00000030098	6	91711503	91777244
Hdac11	ENSMUSG00000034245	6	91106659	91124686
AC121954.1	ENSMUSG00000093052	6	90631364	90631512
AC162914.1	ENSMUSG00000093712	6	91782499	91782569
SNORA17	ENSMUSG00000088379	6	90807531	90807626
Trh	ENSMUSG00000005892	6	92192055	92194644
9530026P05Rik	ENSMUSG00000087573	6	92890363	93222883
Prickle2	ENSMUSG00000030020	6	92320886	92656139
Adamts9	ENSMUSG00000030022	6	92722693	92893486
A730049H05Rik	ENSMUSG00000048636	6	92766472	92797168
Gm15737	ENSMUSG00000079462	6	92819351	92834405
Magi1	ENSMUSG00000045095	6	93625449	94233316
SNORA17	ENSMUSG00000077180	6	93285452	93285582
SNORA44	ENSMUSG00000089069	6	93840609	93840744
SNORA17	ENSMUSG00000088630	6	93459567	93459696
U6	ENSMUSG00000088627	6	93743766	93743871
1700010K10Rik	ENSMUSG00000085413	6	95064011	95067625
AY512915	ENSMUSG00000068180	6	95205720	95283987
Kbtbd8	ENSMUSG00000030031	6	95067234	95079712
Gm10234	ENSMUSG00000068181	6	95272106	95272204
Suclg2	ENSMUSG00000061838	6	95423006	95668792
Fam19a1	ENSMUSG00000059187	6	96063148	96607192
1700123L14Rik	ENSMUSG00000072878	6	96114497	96116199
Lrig1	ENSMUSG00000030029	6	94554523	94650152
U6	ENSMUSG00000077598	6	96510755	96510858
AC162038.1	ENSMUSG00000092767	6	94773727	94773799
U6	ENSMUSG00000065063	6	95050195	95050301
5_8S_rRNA	ENSMUSG00000088595	6	94776775	94776917
U6	ENSMUSG00000065239	6	96419429	96419525
Fam19a4	ENSMUSG00000046500	6	96781203	97010405
Gm765	ENSMUSG00000090667	6	98188008	98292748
A130022J15Rik	ENSMUSG00000035245	6	97060018	97099176
Tmf1	ENSMUSG00000030059	6	97105260	97129118
Uba3	ENSMUSG00000030061	6	97133664	97155636
Arl6ip5	ENSMUSG00000035199	6	97160683	97183309
Lmod3	ENSMUSG00000044086	6	97188522	97202774
Frmd4b	ENSMUSG00000030064	6	97236861	97567535
Mitf	ENSMUSG00000035158	6	97757052	97971352
Gm15531	ENSMUSG00000083086	6	97840282	97840533
SNORA36	ENSMUSG00000065728	6	97112811	97112941
AC158665.1	ENSMUSG00000077813	6	98508733	98508825
U1	ENSMUSG00000065017	6	97522070	97522232
SNORA63	ENSMUSG00000064724	6	97497432	97497561
U6	ENSMUSG00000064571	6	97680433	97680539
SNORA17	ENSMUSG00000089464	6	97740506	97740648
Bhlhe40	ENSMUSG00000030103	6	108610623	108616919
Arl8b	ENSMUSG00000030105	6	108733053	108773717
Edem1	ENSMUSG00000030104	6	108778635	108809350
Gm4604	ENSMUSG00000091845	6	108090114	108090503
Gm16433	ENSMUSG00000043024	6	108513599	108515582
0610040F04Rik	ENSMUSG00000087341	6	108527033	108610928
Gm17055	ENSMUSG00000090576	6	108606911	108609411
Gm6749	ENSMUSG00000068102	6	108831995	108832405
Setmar	ENSMUSG00000034639	6	108015039	108027116
Sumf1	ENSMUSG00000030101	6	108057022	108135576
Itpr1	ENSMUSG00000030102	6	108163112	108501103
St8sia1	ENSMUSG00000030283	6	142770065	142912972
5730419I09Rik	ENSMUSG00000030279	6	142959440	143048627
Etnk1	ENSMUSG00000030275	6	143115750	143157062
Sox5	ENSMUSG00000041540	6	143776945	144730497
D6Ertd474e	ENSMUSG00000072679	6	143194408	143245792
4930579D09Rik	ENSMUSG00000084971	6	143482485	143484028
1700060C16Rik	ENSMUSG00000086887	6	143541873	143599808
4933415D12Rik	ENSMUSG00000087302	6	143970428	143972298
Gm15685	ENSMUSG00000087157	6	144429745	144449936
Gm10396	ENSMUSG00000072677	6	144618947	144621240
4933425H06Rik	ENSMUSG00000085785	6	144621388	144642354
Gm15686	ENSMUSG00000086282	6	144669431	144708403
Gm7518	ENSMUSG00000086731	6	144672085	144673427
SNORA17	ENSMUSG00000077241	6	143413789	143413917
SNORA17	ENSMUSG00000087850	6	144752020	144752152
AC125145.1	ENSMUSG00000093698	6	144516797	144516850
AC127354.1	ENSMUSG00000093369	6	143090111	143090384
Kras	ENSMUSG00000030265	6	145165219	145198759
Ifltd1	ENSMUSG00000054966	6	145313654	145562839
Tuba3b	ENSMUSG00000067338	6	145564277	145569999
Rassf8	ENSMUSG00000030259	6	145695268	145769599
Rassf8	ENSMUSG00000045110	6	145768464	145769594
Bhlhe41	ENSMUSG00000030256	6	145806763	145814078
Sspn	ENSMUSG00000030255	6	145880161	145913743
Itpr2	ENSMUSG00000030287	6	146056821	146450745
Gm17706	ENSMUSG00000090911	6	146140509	146140622
4933424B01Rik	ENSMUSG00000040250	6	146498154	146526357
Fgfr1op2	ENSMUSG00000040242	6	146525725	146547720
Tm7sf3	ENSMUSG00000040234	6	146550874	146591346
Med21	ENSMUSG00000030291	6	146591069	146599124
Stk38l	ENSMUSG00000001630	6	146673517	146727334
Arntl2	ENSMUSG00000040187	6	146744577	146782051
1700023A16Rik	ENSMUSG00000030292	6	146798626	146819928
Ppfibp1	ENSMUSG00000016487	6	146837009	146980547
1700034J05Rik	ENSMUSG00000040163	6	146898851	146902944
Rep15	ENSMUSG00000040121	6	146981059	146982040
Mrps35	ENSMUSG00000040112	6	146991286	147019425
Gm5887	ENSMUSG00000072662	6	147023582	147035554
Klhdc5	ENSMUSG00000040102	6	147039663	147061300
Gm15706	ENSMUSG00000086013	6	145199049	145200369
Rps25-ps1	ENSMUSG00000067344	6	145214906	145215345
2010013B24Rik	ENSMUSG00000087277	6	145251672	145257471
Gm15707	ENSMUSG00000083962	6	145264133	145265128
1700073E17Rik	ENSMUSG00000087204	6	145336116	145350699
Gm15499	ENSMUSG00000086722	6	145390276	145392548
Gm15704	ENSMUSG00000085658	6	145687213	145694793
Gm15705	ENSMUSG00000085414	6	145900176	145906054
Gm15720	ENSMUSG00000082120	6	146411848	146412129
Gm6654	ENSMUSG00000084291	6	146595724	146596135
4930479D17Rik	ENSMUSG00000085238	6	146605740	146613925
Gm7571	ENSMUSG00000080760	6	147122003	147123638
E330012B07Rik	ENSMUSG00000085600	6	147128766	147156807
SNORA17	ENSMUSG00000088362	6	145315378	145315464
SNORA17	ENSMUSG00000088781	6	145412709	145412823
7SK	ENSMUSG00000087852	6	145236448	145236777
Rgs9bp	ENSMUSG00000056043	7	36364017	36370601
Gm17327	ENSMUSG00000090311	7	35009774	35015255
Pdcd2l	ENSMUSG00000002635	7	34969518	34981680
Gpi1	ENSMUSG00000036427	7	34987141	35015308
4931406P16Rik	ENSMUSG00000066571	7	35021726	35098570
Gm6096	ENSMUSG00000078380	7	35036057	35036512
Lsm14a	ENSMUSG00000066568	7	35129665	35174559
Kctd15	ENSMUSG00000030499	7	35424033	35440528
Chst8	ENSMUSG00000060402	7	35459487	35597730
Pepd	ENSMUSG00000063931	7	35697398	35829729
Cebpg	ENSMUSG00000056216	7	35831441	35841522
Cebpa	ENSMUSG00000034957	7	35904312	35906945
Slc7a10	ENSMUSG00000030495	7	35971404	35989917
Lrp3	ENSMUSG00000001802	7	35984852	36000389
Gpatch1	ENSMUSG00000063808	7	36061555	36103459
Rhpn2	ENSMUSG00000030494	7	36119194	36177304
C230052I12Rik	ENSMUSG00000030493	7	36177294	36181836
Rpl23a-ps12	ENSMUSG00000081825	7	34482289	34482756
Gm12782	ENSMUSG00000081714	7	34565836	34566562
Gm12768	ENSMUSG00000081510	7	34629955	34630713
Gm12777	ENSMUSG00000084296	7	34638075	34639837
Gm12757	ENSMUSG00000081317	7	34664314	34665113
Gm12765	ENSMUSG00000083085	7	34722280	34723256
Gm12759	ENSMUSG00000083942	7	34743824	34745005
Gm12773	ENSMUSG00000081962	7	34782018	34782604
Gm12755	ENSMUSG00000081768	7	34783031	34791480
Gm12760	ENSMUSG00000083434	7	34821466	34822451
Gm12779	ENSMUSG00000080947	7	34853574	34853765
Gm12778	ENSMUSG00000081491	7	34960731	34961063
Gm12783	ENSMUSG00000081161	7	34961777	34965023
Gm12762	ENSMUSG00000086526	7	35015439	35019094
Gm12758	ENSMUSG00000085105	7	35019396	35025226
Gm12774	ENSMUSG00000082684	7	35168678	35169093
Gm12764	ENSMUSG00000086184	7	35173684	35179798
Gm12766	ENSMUSG00000085124	7	35223156	35305904
Gm12780	ENSMUSG00000081863	7	35280440	35281084
Gm12784	ENSMUSG00000086631	7	35332225	35341223
Gm12781	ENSMUSG00000085923	7	35438203	35445435
Gm12756	ENSMUSG00000087127	7	35450432	35459018
Ccdc123	ENSMUSG00000023072	7	36182054	36223708
Abpz	ENSMUSG00000046438	7	34522209	34524331
Gm12769	ENSMUSG00000078753	7	34528811	34530122
Abpg	ENSMUSG00000066586	7	34728021	34730059
Abpb	ENSMUSG00000066584	7	34796951	34798961
Abpa	ENSMUSG00000066583	7	34806502	34807900
Gm12776	ENSMUSG00000078752	7	34880450	34885856
Wtip	ENSMUSG00000036459	7	34894562	34918287
Uba2	ENSMUSG00000052997	7	34925708	34954618
Pdcd5	ENSMUSG00000030417	7	36427001	36432540
Dpy19l3	ENSMUSG00000043671	7	36470184	36539473
Ankrd27	ENSMUSG00000034867	7	36371266	36424256
Slc7a9	ENSMUSG00000030492	7	36234056	36251055
Tdrd12	ENSMUSG00000030491	7	36254117	36322764
Nudt19	ENSMUSG00000034875	7	36332204	36341323
SNORA17	ENSMUSG00000077469	7	35728875	35729004
5S_rRNA	ENSMUSG00000088799	7	35886841	35886959
U7	ENSMUSG00000089086	7	34562609	34562673
BX537299.1	ENSMUSG00000077044	7	34593136	34593245
AC150683.1	ENSMUSG00000093715	7	36019779	36019847
AC149058.1	ENSMUSG00000093153	7	35866929	35866998
SNORA17	ENSMUSG00000088307	7	36002254	36002379
Gm5776	ENSMUSG00000078525	7	61667279	61667889
Luzp2	ENSMUSG00000063297	7	62091329	62520736
AC099728.1	ENSMUSG00000092856	7	61468537	61468741
Cyfip1	ENSMUSG00000030447	7	63097115	63186070
Gm17907	ENSMUSG00000092526	7	63157972	63158681
A230056P14Rik	ENSMUSG00000087178	7	63217901	63236238
Nipa2	ENSMUSG00000030452	7	63186657	63217846
Nipa1	ENSMUSG00000047037	7	63232937	63275324
Gm15887	ENSMUSG00000078087	7	63269303	63269797
Herc2	ENSMUSG00000030451	7	63305525	63487164
Siglech	ENSMUSG00000051504	7	63023548	63034295
Tubgcp5	ENSMUSG00000033790	7	63049518	63086817
Gabrg3	ENSMUSG00000055026	7	63971835	64642558
Gm9962	ENSMUSG00000055048	7	64642674	64664249
Gabra5	ENSMUSG00000055078	7	64663060	64765379
Oca2	ENSMUSG00000030450	7	63495130	63791887
Gm15888	ENSMUSG00000085927	7	63235297	63236220
U7	ENSMUSG00000088640	7	62957524	62957585
AC160534.1	ENSMUSG00000092969	7	63045954	63046063
Gm17504	ENSMUSG00000091826	7	73254401	73318007
Lrrc28	ENSMUSG00000030556	7	74658297	74790122
Ttc23	ENSMUSG00000030555	7	74792296	74871462
Synm	ENSMUSG00000030554	7	74875047	74904628
Lysmd4	ENSMUSG00000043831	7	74367494	74373342
Mef2a	ENSMUSG00000030557	7	74376049	74517744
Gm10974	ENSMUSG00000078677	7	73510791	73531195
Aldh1a3	ENSMUSG00000015134	7	73535778	73572403
Asb7	ENSMUSG00000030509	7	73789451	73834482
Lins	ENSMUSG00000053091	7	73834775	73862140
1700112J16Rik	ENSMUSG00000086357	7	74348968	74367344
4833412C05Rik	ENSMUSG00000085850	7	74929611	74948382
Lass3	ENSMUSG00000030510	7	73888390	73968579
Adamts17	ENSMUSG00000058145	7	73984621	74297511
RP23-181K4.1	ENSMUSG00000093405	7	73005892	73006878
Pcsk6	ENSMUSG00000030513	7	73006620	73195226
Snrpa1	ENSMUSG00000030512	7	73205185	73219468
H47	ENSMUSG00000075701	7	73224535	73234298
Chsy1	ENSMUSG00000032640	7	73254401	73318675
Lrrk1	ENSMUSG00000015133	7	73371798	73533236
U6	ENSMUSG00000065800	7	73264189	73264289
AC158296.1	ENSMUSG00000080609	7	74923296	74923416
SNORA70	ENSMUSG00000087926	7	74715453	74715589
5S_rRNA	ENSMUSG00000087834	7	73515278	73515367
A730056A06Rik	ENSMUSG00000092033	7	80458889	80520625
Gm10294	ENSMUSG00000081895	7	79793613	79794216
Gm4971	ENSMUSG00000091647	7	80830418	80831467
Mctp2	ENSMUSG00000032776	7	79222718	79451481
Gm4885	ENSMUSG00000070035	7	79817704	79819164
Rgma	ENSMUSG00000070509	7	80520406	80564785
Chd2	ENSMUSG00000078671	7	80571577	80686632
A830073O21Rik	ENSMUSG00000091890	7	80883779	80885803
Fam174b	ENSMUSG00000078670	7	80885193	80921805
Gm10619	ENSMUSG00000074067	7	80953108	80961389
St8sia2	ENSMUSG00000025789	7	81084005	81158568
7SK	ENSMUSG00000089391	7	80806934	80807186
U6	ENSMUSG00000065729	7	80790871	80790975
Gm7580	ENSMUSG00000085161	7	81537584	81556119
Slco3a1	ENSMUSG00000025790	7	81420305	81699666
snoU109	ENSMUSG00000089573	7	81134982	81135120
7SK	ENSMUSG00000089522	7	82107233	82107583
Sv2b	ENSMUSG00000053025	7	82259783	82454148
1500012K07Rik	ENSMUSG00000086403	7	82453588	82476305
7SK	ENSMUSG00000088683	7	82419975	82420297
Akap13	ENSMUSG00000066406	7	82600420	82899495
U6	ENSMUSG00000087896	7	82813759	82813842
AC158749.1	ENSMUSG00000076961	7	82902145	82902254
Klhl25	ENSMUSG00000055652	7	82993224	83019016
Agbl1	ENSMUSG00000025754	7	83462958	83911494
Wdr93	ENSMUSG00000039099	7	86888049	86930836
Rlbp1	ENSMUSG00000039194	7	86519757	86531913
Fanci	ENSMUSG00000039187	7	86536815	86595151
Mesp1	ENSMUSG00000030544	7	86937127	86938674
Mesp2	ENSMUSG00000030543	7	86955613	86958317
Anpep	ENSMUSG00000039062	7	86966689	86993096
Polg	ENSMUSG00000039176	7	86593677	86611248
Det1	ENSMUSG00000030610	7	85967848	85992122
Aen	ENSMUSG00000030609	7	86040740	86056095
Isg20	ENSMUSG00000039236	7	86058310	86065248
Rhcg	ENSMUSG00000030549	7	86738249	86762543
5730590G19Rik	ENSMUSG00000046591	7	86805082	86843020
Gm16936	ENSMUSG00000087186	7	86162939	86198209
AI854517	ENSMUSG00000085554	7	86645003	86679283
Kif7	ENSMUSG00000050382	7	86842985	86859072
9330171B17Rik	ENSMUSG00000039133	7	86855257	86857243
Plin1	ENSMUSG00000030546	7	86866050	86877662
Gm16017	ENSMUSG00000082400	7	86557196	86557403
Pex11a	ENSMUSG00000030545	7	86880843	86888017
Acan	ENSMUSG00000030607	7	86198369	86259985
Hapln3	ENSMUSG00000030606	7	86260026	86275895
Mfge8	ENSMUSG00000030605	7	86278655	86293946
Abhd2	ENSMUSG00000039202	7	86418087	86510394
Ntrk3	ENSMUSG00000059146	7	85337248	85723294
Gm9885	ENSMUSG00000052629	7	85723716	85725920
Mrpl46	ENSMUSG00000030612	7	85920122	85928417
Mrps11	ENSMUSG00000030611	7	85928005	85937875
Mir7-2	ENSMUSG00000065609	7	86033163	86033259
7SK	ENSMUSG00000089453	7	86497374	86497631
AC110520.1	ENSMUSG00000092873	7	86178089	86178194
U1	ENSMUSG00000064940	7	85055026	85055206
Mir9-3	ENSMUSG00000093238	7	86650150	86650239
AC138376.1	ENSMUSG00000080603	7	86158911	86159001
Ap3s2	ENSMUSG00000063801	7	87020218	87065526
2610034B18Rik	ENSMUSG00000039043	7	87070247	87080245
Gm17512	ENSMUSG00000090948	7	87061838	87065492
5430400D12Rik	ENSMUSG00000091217	7	87065641	87067407
Zfp710	ENSMUSG00000048897	7	87169700	87237637
Idh2	ENSMUSG00000030541	7	87239732	87260278
AC110903.1	ENSMUSG00000077059	7	87094073	87094168
AC164075.1	ENSMUSG00000088354	7	87297706	87297765
Mir1965	ENSMUSG00000088619	7	87297776	87297901
Tbc1d10b	ENSMUSG00000042492	7	134340973	134351982
Mylpf	ENSMUSG00000030672	7	134355122	134357812
Sept1	ENSMUSG00000000486	7	134357961	134362012
Zfp553	ENSMUSG00000045598	7	134376575	134381693
Zfp771	ENSMUSG00000054716	7	134388040	134398317
Dctpp1	ENSMUSG00000042462	7	134400473	134404223
Sephs2	ENSMUSG00000049091	7	134416075	134417433
Gm17511	ENSMUSG00000090460	7	134429515	134430011
Itgal	ENSMUSG00000030830	7	134439774	134478651
Zfp768	ENSMUSG00000047371	7	134486311	134488898
Zfp747	ENSMUSG00000054381	7	134516078	134519564
9130019O22Rik	ENSMUSG00000030823	7	134525774	134530680
E430018J23Rik	ENSMUSG00000078580	7	134533187	134537143
Zfp764	ENSMUSG00000045757	7	134547182	134550336
Zfp688	ENSMUSG00000045251	7	134562481	134565582
Zfp689	ENSMUSG00000048921	7	134587266	134592672
Prr14	ENSMUSG00000030822	7	134603125	134620273
Fbrs	ENSMUSG00000042423	7	134628735	134635027
Srcap	ENSMUSG00000053877	7	134655541	134679890
Srcap	ENSMUSG00000090663	7	134702900	134708780
Phkg2	ENSMUSG00000030815	7	134716854	134726819
Gm166	ENSMUSG00000057176	7	134726602	134732109
Rnf40	ENSMUSG00000030816	7	134732212	134747119
Zfp629	ENSMUSG00000045639	7	134750545	134759311
Bcl7c	ENSMUSG00000030814	7	134806867	134852447
Ctf1	ENSMUSG00000042340	7	134856250	134861699
Ctf2	ENSMUSG00000060034	7	134861620	134869130
Fbxl19	ENSMUSG00000030811	7	134890289	134912441
Orai3	ENSMUSG00000043964	7	134913329	134918664
Setd1a	ENSMUSG00000042308	7	134920184	134943636
Hsd3b7	ENSMUSG00000042289	7	134929122	134947316
Stx1b	ENSMUSG00000030806	7	134947414	134968063
Stx4a	ENSMUSG00000030805	7	134967808	134992533
Zfp668	ENSMUSG00000049728	7	135008684	135020342
Zfp646	ENSMUSG00000049739	7	135020310	135029510
Prss53	ENSMUSG00000044139	7	135029355	135034484
Vkorc1	ENSMUSG00000030804	7	135029741	135039131
Bckdk	ENSMUSG00000030802	7	135047596	135053178
Myst1	ENSMUSG00000030801	7	135056031	135069346
Prss8	ENSMUSG00000030800	7	135069239	135073627
Prss36	ENSMUSG00000070371	7	135076152	135090239
Fus	ENSMUSG00000030795	7	135110971	135125882
B230325K18Rik	ENSMUSG00000063254	7	135126593	135129215
Pycard	ENSMUSG00000030793	7	135135617	135137381
Trim72	ENSMUSG00000042828	7	135147503	135154907
Itgam	ENSMUSG00000030786	7	135206154	135271674
Itgax	ENSMUSG00000030789	7	135273061	135294171
Itgad	ENSMUSG00000070369	7	135297890	135367330
Cox6a2	ENSMUSG00000030785	7	135348950	135349880
9130023H24Rik	ENSMUSG00000062944	7	135377965	135381545
Armc5	ENSMUSG00000042178	7	135380871	135388614
Tgfb1i1	ENSMUSG00000030782	7	135390326	135398287
Slc5a2	ENSMUSG00000030781	7	135409171	135415944
BC017158	ENSMUSG00000030780	7	135414893	135441684
Rgs10	ENSMUSG00000030844	7	135517135	135562272
Tial1	ENSMUSG00000030846	7	135583291	135605231
Bag3	ENSMUSG00000030847	7	135667097	135690491
Inpp5f	ENSMUSG00000042105	7	135754842	135839939
Mcmbp	ENSMUSG00000048170	7	135839955	135884009
Sec23ip	ENSMUSG00000055319	7	135888384	135928350
Gm17468	ENSMUSG00000091912	7	135126084	135128395
[truncated: 1,658 more rows]

## Sheet: wk14IgG2b-PT
Gene Name	Ensembl Gene ID	Chromosome	Start	End
Xkr4	ENSMUSG00000051951	1	3195982	3661579
Rp1	ENSMUSG00000025900	1	4334224	4350473
Sox17	ENSMUSG00000025902	1	4481009	4486494
Mrpl15	ENSMUSG00000033845	1	4763287	4775820
Lypla1	ENSMUSG00000025903	1	4797869	4876851
Tcea1	ENSMUSG00000033813	1	4847775	4887987
Gm6104	ENSMUSG00000062588	1	4869283	4870750
Rgs20	ENSMUSG00000002459	1	4899657	5060366
Atp6v1h	ENSMUSG00000033793	1	5073254	5152630
Gm1992	ENSMUSG00000089699	1	3456668	3503634
Gm17100	ENSMUSG00000091305	1	4917109	4917380
Gm16041	ENSMUSG00000085623	1	4960938	4966901
Gm17101	ENSMUSG00000091665	1	5053141	5054728
U7	ENSMUSG00000089420	1	3773818	3773879
U6	ENSMUSG00000088000	1	4713358	4713460
U6	ENSMUSG00000064376	1	4519098	4519204
U7	ENSMUSG00000088390	1	3668961	3669024
Sntg1	ENSMUSG00000025909	1	8351556	9289959
Rrs1	ENSMUSG00000061024	1	9535489	9537535
Adhfe1	ENSMUSG00000025911	1	9538029	9568051
2610203C22Rik	ENSMUSG00000079671	1	9550913	9621256
3110035E14Rik	ENSMUSG00000067879	1	9591280	9617224
Mybl1	ENSMUSG00000025912	1	9657496	9690290
Vcpip1	ENSMUSG00000045210	1	9708703	9738463
Sgk3	ENSMUSG00000025915	1	9788211	9892637
6030422M02Rik	ENSMUSG00000046101	1	9898719	9932166
Gm10567	ENSMUSG00000073738	1	9950252	9952890
Ppp1r42	ENSMUSG00000025916	1	9958705	9999217
Cops5	ENSMUSG00000025917	1	10014683	10028208
Cspp1	ENSMUSG00000056763	1	10028299	10126849
Arfgef1	ENSMUSG00000067851	1	10127652	10222751
Cpa6	ENSMUSG00000042501	1	10314801	10710026
Gm15452	ENSMUSG00000084353	1	8782004	8782243
Gm6152	ENSMUSG00000086195	1	8846009	8846348
Gm7493	ENSMUSG00000066693	1	8953077	8953702
Gm6161	ENSMUSG00000081441	1	9564629	9565730
Gm6195	ENSMUSG00000046334	1	9792275	9792634
Gm15818	ENSMUSG00000087199	1	9972468	9982447
Gm15604	ENSMUSG00000083422	1	10544179	10545634
1700034P13Rik	ENSMUSG00000085661	1	9737729	9782003
Snord87	ENSMUSG00000093178	1	9932544	9932630
AC163389.1	ENSMUSG00000076135	1	8806219	8806328
7SK	ENSMUSG00000088153	1	10156620	10156859
U6	ENSMUSG00000065035	1	10545635	10545741
U6	ENSMUSG00000065625	1	9448751	9448853
U6	ENSMUSG00000088916	1	9824579	9824683
U6	ENSMUSG00000065085	1	9999895	9999998
Prex2	ENSMUSG00000048960	1	10983546	11293763
A830018L16Rik	ENSMUSG00000057715	1	11404186	11965982
Gm15603	ENSMUSG00000081417	1	10685204	10685695
SNORA66	ENSMUSG00000088585	1	10911751	10911841
SNORA40	ENSMUSG00000077318	1	11124192	11124319
Sulf1	ENSMUSG00000016918	1	12708626	12850452
Slco5a1	ENSMUSG00000025938	1	12856630	12981258
Prdm14	ENSMUSG00000042414	1	13103538	13117244
Ncoa2	ENSMUSG00000005886	1	13129186	13364164
Tram1	ENSMUSG00000025935	1	13554783	13579945
Lactb2	ENSMUSG00000025937	1	13614926	13650627
Xkr9	ENSMUSG00000067813	1	13658852	13691804
Gm17644	ENSMUSG00000066918	1	12657644	12663171
U6	ENSMUSG00000087782	1	13324579	13324690
SNORA17	ENSMUSG00000077368	1	13764415	13764545
U6	ENSMUSG00000064969	1	12365017	12365123
Gm597	ENSMUSG00000048411	1	28832989	28837097
Gm17684	ENSMUSG00000090766	1	28912033	28912718
Gm7846	ENSMUSG00000086240	1	28637343	28637618
Gm5697	ENSMUSG00000081557	1	28857083	28859566
Gm6462	ENSMUSG00000058590	1	28994880	28995185
AC130205.1	ENSMUSG00000093777	1	29341452	29341520
Y_RNA	ENSMUSG00000064433	1	29337809	29337920
AC163659.1	ENSMUSG00000080391	1	29418120	29418215
AC163659.2	ENSMUSG00000080625	1	29358325	29358424
Hs6st1	ENSMUSG00000045216	1	36125245	36163291
Uggt1	ENSMUSG00000037470	1	36198375	36301150
Neurl3	ENSMUSG00000047180	1	36321447	36330270
Arid5a	ENSMUSG00000037447	1	36364578	36380874
4632411B12Rik	ENSMUSG00000010453	1	36392575	36426026
Lman2l	ENSMUSG00000001143	1	36478910	36502116
Cnnm4	ENSMUSG00000037408	1	36528442	36565621
Cnnm3	ENSMUSG00000001138	1	36568712	36585082
Ankrd23	ENSMUSG00000067653	1	36587379	36592584
Ankrd39	ENSMUSG00000079610	1	36595018	36604046
Sema4c	ENSMUSG00000026121	1	36605487	36615194
Fam178b	ENSMUSG00000046337	1	36619539	36740028
Cox5b	ENSMUSG00000061518	1	36748332	36750230
Actr1b	ENSMUSG00000037351	1	36756047	36771267
Zap70	ENSMUSG00000026117	1	36818695	36839663
Tmem131	ENSMUSG00000026116	1	36849036	36996372
Rpl12-ps1	ENSMUSG00000080054	1	37014738	37015362
Vwa3b	ENSMUSG00000050122	1	37083441	37133841
Vwa3b	ENSMUSG00000026115	1	37210689	37244450
Cnga3	ENSMUSG00000026114	1	37275181	37320229
Fer1l5	ENSMUSG00000037432	1	36473733	36478955
D430040D24Rik	ENSMUSG00000087589	1	36615204	36622458
Gm6428	ENSMUSG00000089906	1	36658647	36658991
n-R5s210	ENSMUSG00000070201	1	37062284	37062402
AC084389.1	ENSMUSG00000077939	1	36720810	36720884
U6	ENSMUSG00000064601	1	35818447	35818551
Inpp4a	ENSMUSG00000026113	1	37356710	37467581
6330578E17Rik	ENSMUSG00000026112	1	37473929	37486948
Unc50	ENSMUSG00000026111	1	37487015	37495969
Mgat4a	ENSMUSG00000026110	1	37496185	37597861
2010300C02Rik	ENSMUSG00000026090	1	37668522	37776930
Tsga10	ENSMUSG00000060771	1	37811417	37922143
Lipt1	ENSMUSG00000037216	1	37928583	37934232
Mitd1	ENSMUSG00000026088	1	37931646	37947256
Mrpl30	ENSMUSG00000026087	1	37947322	37955380
Lyg2	ENSMUSG00000061584	1	37962766	37973338
Lyg1	ENSMUSG00000026085	1	38003581	38014604
Txndc9	ENSMUSG00000058407	1	38040712	38054191
Eif5b	ENSMUSG00000026083	1	38054855	38112424
Rev1	ENSMUSG00000026082	1	38109632	38186507
Aff3	ENSMUSG00000037138	1	38234171	38721800
4930439A04Rik	ENSMUSG00000086064	1	37386512	37391017
4930594C11Rik	ENSMUSG00000087233	1	37544038	37545827
4930556I23Rik	ENSMUSG00000089767	1	37671104	37672217
Gm15457	ENSMUSG00000087374	1	37990441	38010981
Gm16150	ENSMUSG00000085391	1	38292265	38303511
Gm16151	ENSMUSG00000085280	1	38364747	38368775
Gm16152	ENSMUSG00000087131	1	38441794	38450819
Gm17715	ENSMUSG00000092106	1	37922144	37928233
7SK	ENSMUSG00000089141	1	38030812	38031048
Lonrf2	ENSMUSG00000048814	1	38850514	38892935
Chst10	ENSMUSG00000026080	1	38920722	38955005
Nms	ENSMUSG00000067604	1	38995994	39007123
Pdcl3	ENSMUSG00000026078	1	39044659	39054081
Npas2	ENSMUSG00000026077	1	39250576	39420079
Rpl31	ENSMUSG00000073702	1	39424696	39428753
Tbc1d8	ENSMUSG00000003134	1	39428344	39535592
Gm20428	ENSMUSG00000092553	1	39333128	39333410
Gm3617	ENSMUSG00000092563	1	39371744	39372298
D1Bwg0212e	ENSMUSG00000003135	1	39591837	39603726
Rnf149	ENSMUSG00000048234	1	39608141	39634250
Creg2	ENSMUSG00000050967	1	39675251	39708027
Rfx8	ENSMUSG00000057173	1	39722151	39777842
Gm15832	ENSMUSG00000085894	1	39604415	39608847
D930019O06Rik	ENSMUSG00000090677	1	39707021	39714235
SNORA33	ENSMUSG00000064936	1	39630591	39630720
Snord89	ENSMUSG00000077704	1	39605590	39605699
U3	ENSMUSG00000065629	1	39576378	39576591
Gm3646	ENSMUSG00000091937	1	39861028	39861189
Map4k4	ENSMUSG00000026074	1	39957758	40083155
Il1r2	ENSMUSG00000026073	1	40141613	40182064
Gm16894	ENSMUSG00000086705	1	40133073	40142698
Il1r1	ENSMUSG00000026072	1	40281925	40373043
Il1rl2	ENSMUSG00000070942	1	40381472	40422316
Il1rl1	ENSMUSG00000026069	1	40486415	40522260
Il18r1	ENSMUSG00000026070	1	40522397	40557699
Il18rap	ENSMUSG00000026068	1	40572207	40608550
Slc9a4	ENSMUSG00000026065	1	40637072	40687576
Slc9a2	ENSMUSG00000026062	1	40738557	40825730
snoU13	ENSMUSG00000088965	1	40666590	40666680
Mfsd9	ENSMUSG00000041945	1	40828883	40847532
Tmem182	ENSMUSG00000079588	1	40862446	40912789
Tpp2	ENSMUSG00000041763	1	43990847	44059844
A530098C11Rik	ENSMUSG00000047343	1	44066253	44076879
Gm8251	ENSMUSG00000091844	1	44112797	44118781
1700029F09Rik	ENSMUSG00000026049	1	44143458	44159286
Kdelc1	ENSMUSG00000026047	1	44148308	44175653
Bivm	ENSMUSG00000041684	1	44175802	44201615
Ercc5	ENSMUSG00000026048	1	44204589	44238105
4832428D23Rik	ENSMUSG00000046828	1	44260915	44275806
Gulp1	ENSMUSG00000056870	1	44608356	44853678
Col3a1	ENSMUSG00000026043	1	45368383	45406551
Col5a2	ENSMUSG00000026042	1	45431166	45560127
Wdr75	ENSMUSG00000025995	1	45852011	45880464
Slc40a1	ENSMUSG00000025993	1	45964915	45982439
Rpl23a-ps1	ENSMUSG00000070896	1	46038393	46038860
Gm15838	ENSMUSG00000090106	1	44075315	44075494
Gm15833	ENSMUSG00000089703	1	44269007	44269963
Gm16102	ENSMUSG00000089877	1	44701124	44701543
Gm5526	ENSMUSG00000084817	1	45914177	45914632
Gm5269	ENSMUSG00000091090	1	45946370	45947118
AC109305.1	ENSMUSG00000093391	1	45863981	45864051
U6	ENSMUSG00000065010	1	45742301	45742407
RNaseP_nuc	ENSMUSG00000087764	1	45829807	45830009
AC124406.1	ENSMUSG00000078019	1	44528122	44528208
SNORA55	ENSMUSG00000065255	1	45803740	45803870
Gm3852	ENSMUSG00000090682	1	46068602	46068865
Gm4776	ENSMUSG00000044457	1	46076917	46087314
Dnahc7b	ENSMUSG00000041144	1	46123583	46430395
Dnahc7c	ENSMUSG00000078595	1	46665806	46682956
Slc39a10	ENSMUSG00000025986	1	46864389	46910891
Gm4852	ENSMUSG00000081185	1	47422488	47423216
n-R5s211	ENSMUSG00000070199	1	46431042	46431160
Tmem194b	ENSMUSG00000043015	1	52687549	52708763
Mfsd6	ENSMUSG00000041439	1	52713130	52784306
Inpp1	ENSMUSG00000026102	1	52846257	52874532
Hibch	ENSMUSG00000041426	1	52901857	52977830
1700019D03Rik	ENSMUSG00000043629	1	52979168	53020104
Mstn	ENSMUSG00000026100	1	53118507	53124923
1700019A02Rik	ENSMUSG00000060715	1	53215421	53244461
Pms1	ENSMUSG00000026098	1	53246031	53353862
Ormdl1	ENSMUSG00000026097	1	53353939	53367153
Osgepl1	ENSMUSG00000026096	1	53370468	53383187
Asnsd1	ENSMUSG00000026095	1	53382351	53409596
Dnahc7a	ENSMUSG00000067440	1	53604023	53622541
Stk17b	ENSMUSG00000026094	1	53812350	53842068
Hecw2	ENSMUSG00000042807	1	53863726	54252012
Ccdc150	ENSMUSG00000025983	1	54307527	54425571
Gtf3c3	ENSMUSG00000041303	1	54454425	54495815
Pgap1	ENSMUSG00000073678	1	54529844	54532810
Pgap1	ENSMUSG00000070889	1	54537550	54614526
Gm16107	ENSMUSG00000089802	1	52929981	52930842
SNORA17	ENSMUSG00000089334	1	53156894	53156994
U6	ENSMUSG00000064498	1	54305946	54306052
U1	ENSMUSG00000087949	1	53943672	53943785
AC122925.1	ENSMUSG00000092657	1	53500115	53500239
Pikfyve	ENSMUSG00000025949	1	65233324	65320586
Pth2r	ENSMUSG00000025946	1	65328630	65435818
Idh1	ENSMUSG00000025950	1	65205190	65233053
Fastkd2	ENSMUSG00000025962	1	63777188	63801229
4933402D24Rik	ENSMUSG00000025961	1	63801481	63815841
Klf7	ENSMUSG00000025959	1	64076021	64168856
Creb1	ENSMUSG00000025958	1	64579378	64651121
Mettl21a	ENSMUSG00000025956	1	64653047	64663816
Ccnyl1	ENSMUSG00000070871	1	64737029	64772218
Fzd5	ENSMUSG00000045005	1	64777134	64784324
Plekhm3	ENSMUSG00000051344	1	64832557	65003398
Akr1cl	ENSMUSG00000025955	1	65059263	65079333
Cryge	ENSMUSG00000070870	1	65095128	65097723
Crygd	ENSMUSG00000067299	1	65108446	65110026
Crygc	ENSMUSG00000025952	1	65118099	65120263
Crygb	ENSMUSG00000073658	1	65126804	65128862
Cryga	ENSMUSG00000044429	1	65146963	65149947
D630023F18Rik	ENSMUSG00000044816	1	65147193	65169788
Gm13751	ENSMUSG00000080817	1	63891401	63892152
Gm13754	ENSMUSG00000082373	1	63964422	63982506
Gm13749	ENSMUSG00000044689	1	64011301	64015573
Gm13748	ENSMUSG00000086836	1	64125228	64137356
Gm13750	ENSMUSG00000086721	1	64196775	64197239
2810408I11Rik	ENSMUSG00000087213	1	64726445	64737233
Rpl10a-ps1	ENSMUSG00000084416	1	65040498	65041205
Gm8550	ENSMUSG00000090042	1	65074654	65075306
Gm5255	ENSMUSG00000082565	1	65597038	65597811
Gm8805	ENSMUSG00000082774	1	65599256	65599568
Gm17427	ENSMUSG00000090886	1	64076037	64079501
AC167197.1	ENSMUSG00000093228	1	64442908	64442977
U1	ENSMUSG00000077471	1	65047881	65048036
Atg9a	ENSMUSG00000033124	1	75177440	75188497
Glb1l	ENSMUSG00000026200	1	75194818	75207353
Stk16	ENSMUSG00000026201	1	75207413	75212181
Tuba4a	ENSMUSG00000026202	1	75211549	75215828
Dnajb2	ENSMUSG00000026203	1	75233040	75241379
Ptprn	ENSMUSG00000026204	1	75243616	75260783
Resp18	ENSMUSG00000033061	1	75268774	75274990
Dnpep	ENSMUSG00000026209	1	75304471	75314212
Des	ENSMUSG00000026208	1	75356904	75365154
Speg	ENSMUSG00000026207	1	75371872	75428895
Gmppa	ENSMUSG00000033021	1	75432505	75439754
Accn4	ENSMUSG00000033007	1	75447011	75470918
Chpf	ENSMUSG00000032997	1	75471144	75476046
Obsl1	ENSMUSG00000026211	1	75475885	75503027
Tmem198	ENSMUSG00000051703	1	75476107	75482280
Inha	ENSMUSG00000032968	1	75503652	75506941
Stk11ip	ENSMUSG00000026213	1	75518104	75533910
Slc4a3	ENSMUSG00000006576	1	75542841	75558747
Ankzf1	ENSMUSG00000026199	1	75188709	75195962
Gm15179	ENSMUSG00000085653	1	75364787	75371587
Gm15178	ENSMUSG00000086053	1	75388706	75392938
Gm15181	ENSMUSG00000082745	1	75510682	75510858
Gm15183	ENSMUSG00000082059	1	75538786	75539133
Gm15180	ENSMUSG00000083244	1	75564658	75565149
Gm15182	ENSMUSG00000082528	1	75621229	75622904
Gm5257	ENSMUSG00000082012	1	75632965	75633754
5S_rRNA	ENSMUSG00000089326	1	77141328	77141421
Epha4	ENSMUSG00000026235	1	77363760	77511663
U1	ENSMUSG00000065215	1	77894858	77895021
Pax3	ENSMUSG00000004872	1	78097842	78193709
Sgpp2	ENSMUSG00000032908	1	78306921	78416861
Farsb	ENSMUSG00000026245	1	78414533	78485434
BC035947	ENSMUSG00000090486	1	78494381	78508538
Mogat1	ENSMUSG00000012187	1	78507566	78534748
Acsl3	ENSMUSG00000032883	1	78654400	78703562
Utp14b	ENSMUSG00000079470	1	78654613	78664163
Kcne4	ENSMUSG00000047330	1	78813502	78816599
Gm5830	ENSMUSG00000072978	1	78964212	78964654
Scg2	ENSMUSG00000050711	1	79431244	79436665
Ap1s3	ENSMUSG00000054702	1	79603451	79668547
Wdfy1	ENSMUSG00000073643	1	79698837	79772718
SNORA17	ENSMUSG00000077782	1	79510314	79510439
Mrpl44	ENSMUSG00000026248	1	79772593	79778020
Serpine2	ENSMUSG00000026249	1	79790772	79855271
Gm5529	ENSMUSG00000067106	1	79919111	79920082
U6	ENSMUSG00000064589	1	80132041	80132147
Fam124b	ENSMUSG00000043230	1	80195281	80215048
Cul3	ENSMUSG00000004364	1	80261498	80337055
Gm6189	ENSMUSG00000090637	1	80379679	80381763
Dock10	ENSMUSG00000038608	1	80497648	80755128
9430031J16Rik	ENSMUSG00000054976	1	81073525	81338339
Gm5530	ENSMUSG00000087008	1	81738560	81739544
Irs1	ENSMUSG00000055980	1	82229676	82287991
Gm9747	ENSMUSG00000022591	1	82229687	82232508
Rhbdd1	ENSMUSG00000026142	1	82313027	82441941
Col4a4	ENSMUSG00000067158	1	82447298	82583424
AC160543.1	ENSMUSG00000080388	1	82393272	82393392
Col4a3	ENSMUSG00000079465	1	82583496	82718634
C430014B12Rik	ENSMUSG00000085879	1	82688503	82721692
n-R5s213	ENSMUSG00000065055	1	82631588	82631685
Mff	ENSMUSG00000026150	1	82721465	82748969
Tm4sf20	ENSMUSG00000026149	1	82753224	82765036
Agfg1	ENSMUSG00000026159	1	82836058	82892850
AC138214.1	ENSMUSG00000093782	1	82836021	82836073
Slc19a3	ENSMUSG00000038496	1	83009098	83035023
Ccl20	ENSMUSG00000026166	1	83113341	83115742
Wdr69	ENSMUSG00000053161	1	83156327	83207149
Sphkap	ENSMUSG00000026163	1	83250714	83404775
n-R5s214	ENSMUSG00000084443	1	83213246	83213366
Gm6374	ENSMUSG00000079140	1	83311088	83311875
AC158909.1	ENSMUSG00000080572	1	83792487	83792607
SNORA17	ENSMUSG00000077736	1	83918493	83918616
Pid1	ENSMUSG00000045658	1	84032868	84360755
Dner	ENSMUSG00000036766	1	84366416	84692796
Arl4c	ENSMUSG00000049866	1	90569700	90598796
Sh3bp4	ENSMUSG00000036206	1	90966990	91051643
Agap1	ENSMUSG00000055013	1	91351381	91791857
Gbx2	ENSMUSG00000034486	1	91824537	91829865
D130058E05Rik	ENSMUSG00000092627	1	91826809	91828437
Asb18	ENSMUSG00000067081	1	91849166	91911241
Iqca	ENSMUSG00000026301	1	91938707	92049976
Cxcr7	ENSMUSG00000044337	1	92100555	92113326
Cops8	ENSMUSG00000034432	1	92500000	92509916
7SK	ENSMUSG00000088775	1	91581377	91581687
5S_rRNA	ENSMUSG00000088371	1	91459935	91460049
Olfr1415	ENSMUSG00000057464	1	94387395	94388330
Olfr1414	ENSMUSG00000042849	1	94407625	94415092
Olfr1413	ENSMUSG00000058904	1	94469702	94470783
Olfr1412	ENSMUSG00000046300	1	94484909	94485874
Olfr1411	ENSMUSG00000062497	1	94493098	94494069
Olfr1410	ENSMUSG00000063583	1	94504416	94505424
Olfr12	ENSMUSG00000061616	1	94516458	94517578
Myeov2	ENSMUSG00000073616	1	94533722	94538562
Otos	ENSMUSG00000044055	1	94540795	94545418
Gpc1	ENSMUSG00000034220	1	94728222	94756775
Ankmy1	ENSMUSG00000034212	1	94766706	94799483
Dusp28	ENSMUSG00000047067	1	94803566	94805197
Rnpepl1	ENSMUSG00000026269	1	94807982	94817415
Capn10	ENSMUSG00000026270	1	94830953	94844518
Gpr35	ENSMUSG00000026271	1	94869696	94882968
Aqp12	ENSMUSG00000045091	1	94902911	94908846
Kif1a	ENSMUSG00000014602	1	94912033	94998442
Gm17672	ENSMUSG00000090847	1	95005394	95007262
Agxt	ENSMUSG00000026272	1	95031822	95041984
2310007B03Rik	ENSMUSG00000034159	1	95047926	95057525
E030010N08Rik	ENSMUSG00000084989	1	95112476	95127649
Sned1	ENSMUSG00000047793	1	95132418	95197642
Mterfd2	ENSMUSG00000026273	1	95195788	95202492
Pask	ENSMUSG00000026274	1	95205347	95240059
Ppp1r7	ENSMUSG00000026275	1	95239431	95270066
Ano7	ENSMUSG00000034107	1	95270473	95300079
Hdlbp	ENSMUSG00000034088	1	95302517	95375385
Gm17415	ENSMUSG00000090489	1	95318265	95319065
Sept2	ENSMUSG00000026276	1	95375541	95406837
Farp2	ENSMUSG00000034066	1	95408656	95518553
Stk25	ENSMUSG00000026277	1	95518479	95532299
Bok	ENSMUSG00000026278	1	95582271	95592339
Thap4	ENSMUSG00000026279	1	95601968	95651415
Atg4b	ENSMUSG00000026280	1	95648077	95686372
Dtymk	ENSMUSG00000026281	1	95689153	95698511
Ing5	ENSMUSG00000026283	1	95700542	95718678
D2hgdh	ENSMUSG00000073609	1	95721817	95748925
Gal3st2	ENSMUSG00000034005	1	95757921	95773071
Gm9994	ENSMUSG00000056307	1	95824364	95839221
Gm7889	ENSMUSG00000091067	1	95879623	95882396
Gm6086	ENSMUSG00000073608	1	95887086	95908118
Neu4	ENSMUSG00000034000	1	95917070	95924903
Pdcd1	ENSMUSG00000026285	1	95934884	95949130
Gm17386	ENSMUSG00000091447	1	96048774	96049705
5033417F24Rik	ENSMUSG00000091828	1	94804957	94807341
U6	ENSMUSG00000088961	1	95705147	95705248
U6	ENSMUSG00000064389	1	95259832	95259934
Mir149	ENSMUSG00000065470	1	94746955	94747020
AC131316.1	ENSMUSG00000093284	1	95549077	95549367
Slco6c1	ENSMUSG00000026331	1	98955615	99024830
D1Ertd622e	ENSMUSG00000044768	1	99540480	99558651
Ppip5k2	ENSMUSG00000040648	1	99602625	99666988
Gin1	ENSMUSG00000026333	1	99666749	99690286
Pam	ENSMUSG00000026335	1	99691691	99992223
Slco6d1	ENSMUSG00000026336	1	100317701	100413565
Gm6430	ENSMUSG00000044757	1	98921090	98923123
Gm3531	ENSMUSG00000089782	1	99845478	99845966
B230216N24Rik	ENSMUSG00000089706	1	99927693	99954257
Gm3555	ENSMUSG00000089791	1	100354345	100355739
7SK	ENSMUSG00000089169	1	99832977	99833288
AC102227.1	ENSMUSG00000077048	1	100446028	100446137
U6	ENSMUSG00000065921	1	99946399	99946505
9330185C12Rik	ENSMUSG00000086520	1	115787962	115860711
SNORA42	ENSMUSG00000084546	1	115614491	115614624
Cntnap5a	ENSMUSG00000070695	1	117581333	118478603
Nckap5	ENSMUSG00000049690	1	127810197	128727376
Mgat5	ENSMUSG00000036155	1	129101563	129380281
Tmem163	ENSMUSG00000026347	1	129383123	129574673
Acmsd	ENSMUSG00000026348	1	129625990	129664141
Ccnt2	ENSMUSG00000026349	1	129670741	129704638
Ysk4	ENSMUSG00000051590	1	129711848	129736867
Rab3gap1	ENSMUSG00000036104	1	129765350	129840445
AC164156.1	ENSMUSG00000080345	1	128364712	128364801
AC131793.1	ENSMUSG00000093146	1	129228389	129228518
snoU6-53	ENSMUSG00000065687	1	129271708	129271816
Fcamr	ENSMUSG00000026415	1	132697479	132711317
Pigr	ENSMUSG00000026417	1	132723261	132748826
Faim3	ENSMUSG00000042474	1	132762246	132777367
Il24	ENSMUSG00000026420	1	132778651	132784031
Il20	ENSMUSG00000026416	1	132803769	132807873
Il19	ENSMUSG00000016524	1	132829235	132836650
Il10	ENSMUSG00000016529	1	132916422	132921551
Mapkapk2	ENSMUSG00000016528	1	132950281	132994144
Dyrk3	ENSMUSG00000016526	1	133025018	133034811
Eif2d	ENSMUSG00000026427	1	133049758	133084235
Rassf5	ENSMUSG00000026430	1	133072987	133141835
Ikbke	ENSMUSG00000042349	1	133150920	133176183
Srgap2	ENSMUSG00000026425	1	133181828	133423938
Fam72a	ENSMUSG00000055184	1	133424480	133436449
Avpr1b	ENSMUSG00000026432	1	133495816	133508577
Ctse	ENSMUSG00000004552	1	133534883	133572080
5430435G22Rik	ENSMUSG00000052688	1	133585272	133610119
Slc26a9	ENSMUSG00000042268	1	133640599	133668081
Pm20d1	ENSMUSG00000042251	1	133693958	133718050
Slc41a1	ENSMUSG00000013275	1	133724070	133745442
Rab7l1	ENSMUSG00000026433	1	133763801	133769464
Nucks1	ENSMUSG00000026434	1	133807035	133832898
Slc45a3	ENSMUSG00000026435	1	133867186	133879540
Elk4	ENSMUSG00000026436	1	133904184	133929189
Mfsd4	ENSMUSG00000059149	1	133919383	133964639
Cdk18	ENSMUSG00000026437	1	134010127	134036262
Lemd1	ENSMUSG00000079330	1	134088013	134153958
Gm10188	ENSMUSG00000066936	1	134125625	134126344
Klhdc8a	ENSMUSG00000042115	1	134195203	134203934
Nuak2	ENSMUSG00000009772	1	134212703	134230065
Tmcc2	ENSMUSG00000042066	1	134252892	134287858
Dstyk	ENSMUSG00000042046	1	134314030	134363536
Rbbp5	ENSMUSG00000026439	1	134373944	134402242
Tmem81	ENSMUSG00000048174	1	134402807	134405214
Cntn2	ENSMUSG00000053024	1	134406002	134439517
Nfasc	ENSMUSG00000026442	1	134461268	134638374
1700037F24Rik	ENSMUSG00000091344	1	134097646	134100380
Gm17288	ENSMUSG00000091310	1	133933382	133964522
6030442K20Rik	ENSMUSG00000090678	1	134363010	134373622
Gm15848	ENSMUSG00000086706	1	132706554	132720661
Gm7241	ENSMUSG00000089808	1	134181024	134181386
Gm15849	ENSMUSG00000090079	1	134277706	134279086
U6	ENSMUSG00000088705	1	132970235	132970328
7SK	ENSMUSG00000089256	1	132998970	132999322
AC161805.1	ENSMUSG00000092700	1	133722552	133722622
U6	ENSMUSG00000088779	1	133997216	133997331
Mir135b	ENSMUSG00000065435	1	134094665	134094761
AC109299.1	ENSMUSG00000076287	1	133395216	133395379
Snrpe	ENSMUSG00000090553	1	135500448	135506868
Zc3h11a	ENSMUSG00000026464	1	135516448	135557957
Lax1	ENSMUSG00000051998	1	135575606	135586685
Gm17678	ENSMUSG00000091176	1	135598216	135598458
Atp2b4	ENSMUSG00000026463	1	135599255	135697618
Optc	ENSMUSG00000010311	1	135793773	135804576
Prelp	ENSMUSG00000041577	1	135806881	135817991
Fmod	ENSMUSG00000041559	1	135933831	135944854
Btg2	ENSMUSG00000020423	1	135971747	135975697
Gm8618	ENSMUSG00000073559	1	136005915	136006417
Chit1	ENSMUSG00000026450	1	136007819	136048117
Chi3l1	ENSMUSG00000064246	1	136078753	136086758
Mybph	ENSMUSG00000042451	1	136090025	136097808
Adora1	ENSMUSG00000042429	1	136095800	136132008
Myog	ENSMUSG00000026459	1	136186581	136189124
Ppfia4	ENSMUSG00000026458	1	136193360	136229505
Tmem183a	ENSMUSG00000042305	1	136242674	136258576
4933406M09Rik	ENSMUSG00000050526	1	136282517	136287560
Cyb5r1	ENSMUSG00000026456	1	136302358	136308317
Adipor1	ENSMUSG00000026457	1	136311955	136329928
Klhl12	ENSMUSG00000026455	1	136352108	136387595
Gm11092	ENSMUSG00000079319	1	136373211	136373787
Rabif	ENSMUSG00000042229	1	136391225	136406451
4931440L10Rik	ENSMUSG00000046367	1	136437518	136446259
Kdm5b	ENSMUSG00000042207	1	136456748	136529454
Syt2	ENSMUSG00000026452	1	136605877	136649726
Ppp1r12b	ENSMUSG00000073557	1	136651235	136852519
Ube2t	ENSMUSG00000026429	1	136859142	136870739
Lgr6	ENSMUSG00000042793	1	136882925	137001853
Ptprv	ENSMUSG00000066885	1	137007746	137008883
Ptpn7	ENSMUSG00000031506	1	137029302	137041897
Arl8a	ENSMUSG00000026426	1	137043401	137052846
Gpr37l1	ENSMUSG00000026424	1	137056811	137064258
Elf3	ENSMUSG00000003051	1	137150151	137155049
Rnpep	ENSMUSG00000041926	1	137159289	137180661
Timm17a	ENSMUSG00000062580	1	137198109	137210355
Lmod1	ENSMUSG00000048096	1	137221384	137264642
Shisa4	ENSMUSG00000041889	1	137267634	137271814
Ipo9	ENSMUSG00000041879	1	137278889	137327076
Nav1	ENSMUSG00000009418	1	137331157	137481932
Gm3834	ENSMUSG00000091246	1	136538831	136543097
Gm17713	ENSMUSG00000092104	1	135506988	135510999
Gm16606	ENSMUSG00000085392	1	137145138	137163020
Gm15851	ENSMUSG00000090208	1	135803108	135811399
Gm15454	ENSMUSG00000060342	1	136414607	136415258
Gm15445	ENSMUSG00000085311	1	137049540	137050383
Gm4204	ENSMUSG00000079139	1	137129022	137129801
SNORA32	ENSMUSG00000064814	1	135497800	135497932
5S_rRNA	ENSMUSG00000087721	1	137047243	137047343
U6	ENSMUSG00000087859	1	137250294	137250399
AC131591.1	ENSMUSG00000077846	1	136705852	136705945
U6	ENSMUSG00000084509	1	136177462	136177568
SNORA61	ENSMUSG00000077202	1	136401915	136402040
AC016814.1	ENSMUSG00000093515	1	137351180	137351260
Gm4793	ENSMUSG00000054412	1	137481350	137496527
Nav1	ENSMUSG00000090399	1	137503024	137584682
Cdc73	ENSMUSG00000026361	1	145445927	145550023
Cdc73	ENSMUSG00000078284	1	145452292	145453738
B3galt2	ENSMUSG00000033849	1	145487794	145497536
Glrx2	ENSMUSG00000018196	1	145586159	145596806
Trove2	ENSMUSG00000018199	1	145597920	145624198
Uchl5	ENSMUSG00000018189	1	145624408	145654596
Rgs2	ENSMUSG00000026360	1	145846468	145851291
Rgs13	ENSMUSG00000051079	1	145985797	146024502
Rgs1	ENSMUSG00000026358	1	146091102	146096372
Rgs21	ENSMUSG00000091758	1	146366820	146388442
Rgs18	ENSMUSG00000026357	1	146599813	146622565
Gm6397	ENSMUSG00000089640	1	145530360	145531428
snoU109	ENSMUSG00000088323	1	145626058	145626192
SNORA17	ENSMUSG00000088579	1	147138484	147138610
U6	ENSMUSG00000065787	1	146807864	146807969
AC102320.1	ENSMUSG00000092688	1	146826614	146826715
U4	ENSMUSG00000088096	1	146456134	146456240
Astn1	ENSMUSG00000026587	1	160292471	160621917
Pappa2	ENSMUSG00000073530	1	160641862	160887870
1600012P17Rik	ENSMUSG00000047661	1	160888258	160910621
Gm4953	ENSMUSG00000061992	1	161098288	161098773
Rfwd2	ENSMUSG00000040782	1	161162457	161277711
Gm10530	ENSMUSG00000073528	1	161544880	161615006
Tnr	ENSMUSG00000015829	1	161667641	161855053
4930523C07Rik	ENSMUSG00000090394	1	161974515	162008559
4930523C07Rik	ENSMUSG00000050883	1	161974715	162001640
4930562F07Rik	ENSMUSG00000026729	1	162004866	162008116
Tnn	ENSMUSG00000026725	1	162015165	162083711
Mrps14	ENSMUSG00000058267	1	162125346	162132301
Cacybp	ENSMUSG00000014226	1	162133056	162142908
Rabgap1l	ENSMUSG00000026721	1	162149305	162723069
Gm10529	ENSMUSG00000073527	1	162005293	162005672
Mir488	ENSMUSG00000070103	1	160435756	160435864
AC084287.1	ENSMUSG00000080410	1	161261927	161262009
Mir1927	ENSMUSG00000089204	1	162225995	162226103
SNORA17	ENSMUSG00000088145	1	161913627	161913736
Scarna3a	ENSMUSG00000089536	1	161270414	161270553
Mettl11b	ENSMUSG00000040113	1	165632388	165655363
Kifap3	ENSMUSG00000026585	1	165709714	165847240
Scyl3	ENSMUSG00000026584	1	165859231	165885257
BC055324	ENSMUSG00000041406	1	165876124	165924927
2810422O20Rik	ENSMUSG00000041396	1	165925020	165927374
Sele	ENSMUSG00000026582	1	165978365	165987808
Sell	ENSMUSG00000026581	1	165992207	166010916
Selp	ENSMUSG00000026580	1	166045395	166080157
F5	ENSMUSG00000026579	1	166081969	166150408
Slc19a2	ENSMUSG00000040918	1	166179177	166195516
4930455F23Rik	ENSMUSG00000026578	1	166205716	166217978
Blzf1	ENSMUSG00000026577	1	166219931	166237620
Nme7	ENSMUSG00000026575	1	166243010	166334805
Atp1b1	ENSMUSG00000026576	1	166367398	166388486
Dpt	ENSMUSG00000026574	1	166726863	166754397
Xcl1	ENSMUSG00000026573	1	166861775	166865658
Tbx19	ENSMUSG00000026572	1	167067986	167090904
Sft2d2	ENSMUSG00000040848	1	167104472	167124564
Tiprl	ENSMUSG00000040843	1	167145053	167167074
Gpr161	ENSMUSG00000040836	1	167232756	167253061
Dcaf6	ENSMUSG00000026571	1	167259642	167390596
Brp44	ENSMUSG00000026568	1	167391168	167411345
Adcy10	ENSMUSG00000026567	1	167415314	167506905
Mpzl1	ENSMUSG00000026566	1	167522312	167564672
Gm16608	ENSMUSG00000086116	1	166433438	166445013
Gm2343	ENSMUSG00000089700	1	165659700	165660741
Gm16587	ENSMUSG00000090081	1	166073563	166076497
Gm16548	ENSMUSG00000086593	1	166078722	166082348
Gm16588	ENSMUSG00000089790	1	166096710	166097064
Gm16550	ENSMUSG00000089967	1	167078955	167079080
SNORA17	ENSMUSG00000089299	1	167370756	167370840
7SK	ENSMUSG00000087886	1	167428130	167428380
AC133891.1	ENSMUSG00000080561	1	166954476	166954587
SNORA18	ENSMUSG00000089291	1	167501981	167502107
Rcsd1	ENSMUSG00000040723	1	167579076	167638225
Creg1	ENSMUSG00000040713	1	167693877	167705439
Cd247	ENSMUSG00000005763	1	167718812	167807407
Gm16565	ENSMUSG00000089829	1	167711206	167719498
5S_rRNA	ENSMUSG00000088618	1	167715965	167716082
Pou2f1	ENSMUSG00000026565	1	167795285	167932809
U6	ENSMUSG00000070191	1	167739767	167739873
Gm17444	ENSMUSG00000091458	1	167933089	167968389
Dusp27	ENSMUSG00000026564	1	168028284	168058029
Gpa33	ENSMUSG00000000544	1	168060369	168096641
Mael	ENSMUSG00000040629	1	168131516	168168875
Ildr2	ENSMUSG00000040612	1	168184270	168246954
5330438I03Rik	ENSMUSG00000091393	1	168236872	168239716
Tada1	ENSMUSG00000026563	1	168309228	168323752
Pogk	ENSMUSG00000040596	1	168314753	168339994
Gm15853	ENSMUSG00000089853	1	168309970	168310624
Gm16418	ENSMUSG00000084093	1	168361836	168362006
Gm4846	ENSMUSG00000086056	1	168413744	168427719
Gm4847	ENSMUSG00000051081	1	168559102	168577824
mmu-mir-1194	ENSMUSG00000080682	1	168550493	168550613
Fmo9	ENSMUSG00000026560	1	168592186	168611976
Gm4954	ENSMUSG00000085841	1	168692276	168700616
Gm6286	ENSMUSG00000086925	1	168875728	168876489
Gm16701	ENSMUSG00000086622	1	168904155	168930972
Fam78b	ENSMUSG00000060568	1	168931548	169021433
Uck2	ENSMUSG00000053664	1	169153958	169154050
Uck2	ENSMUSG00000026558	1	169156221	169215258
Tmco1	ENSMUSG00000052428	1	169238801	169264109
Aldh9a1	ENSMUSG00000026687	1	169280122	169298661
U6	ENSMUSG00000064426	1	169279156	169279262
mmu-mir-2134-1	ENSMUSG00000088246	1	169270500	169270555
Mgst3	ENSMUSG00000026688	1	169302097	169323972
Lrrc52	ENSMUSG00000040485	1	169375806	169396911
Rxrg	ENSMUSG00000015843	1	169528515	169569754
Lmx1a	ENSMUSG00000026686	1	169619370	169778872
Pbx1	ENSMUSG00000052534	1	170050130	170362401
RP23-45N11.1	ENSMUSG00000093538	1	170045375	170052596
Fcgr4	ENSMUSG00000059089	1	172949051	172959892
Fcgr3	ENSMUSG00000059498	1	172981300	172995066
1700009P17Rik	ENSMUSG00000026649	1	173044049	173057098
Sdhc	ENSMUSG00000058076	1	173057296	173080734
Mpz	ENSMUSG00000056569	1	173080842	173091261
Pcp4l1	ENSMUSG00000038370	1	173103393	173126399
Nr1i3	ENSMUSG00000005677	1	173144101	173150832
Tomm40l	ENSMUSG00000005674	1	173147933	173152645
Apoa2	ENSMUSG00000005681	1	173155185	173156510
Fcer1g	ENSMUSG00000058715	1	173159703	173164496
Ndufs2	ENSMUSG00000013593	1	173164984	173177253
Adamts4	ENSMUSG00000006403	1	173180552	173190768
B4galt3	ENSMUSG00000052423	1	173200459	173207027
Ppox	ENSMUSG00000062729	1	173206121	173211317
Usp21	ENSMUSG00000053483	1	173212076	173218122
Ufc1	ENSMUSG00000062963	1	173218694	173225155
Rpl27-ps1	ENSMUSG00000079137	1	173235215	173235625
Dedd	ENSMUSG00000013973	1	173259276	173272462
Nit1	ENSMUSG00000013997	1	173268139	173275777
Pfdn2	ENSMUSG00000006412	1	173275801	173289385
Klhdc9	ENSMUSG00000045259	1	173288577	173290929
Pvrl4	ENSMUSG00000006411	1	173300230	173318729
Arhgap30	ENSMUSG00000048865	1	173319085	173340429
Usf1	ENSMUSG00000026641	1	173341444	173349273
Tstd1	ENSMUSG00000091166	1	173349164	173350483
F11r	ENSMUSG00000038235	1	173367666	173394734
B930036N10Rik	ENSMUSG00000091993	1	173432927	173434242
Alyref2	ENSMUSG00000060244	1	173433609	173434881
Gm9765	ENSMUSG00000038218	1	173445364	173447053
Itln1	ENSMUSG00000038209	1	173448253	173465425
Cd244	ENSMUSG00000004709	1	173489324	173515449
Ly9	ENSMUSG00000004707	1	173518755	173537541
Slamf7	ENSMUSG00000038179	1	173562534	173579149
Cd48	ENSMUSG00000015355	1	173612140	173635389
Slamf1	ENSMUSG00000015316	1	173697258	173731315
Cd84	ENSMUSG00000038147	1	173769828	173820849
Gm10521	ENSMUSG00000073492	1	173825795	173828368
Slamf6	ENSMUSG00000015314	1	173847646	173879083
Vangl2	ENSMUSG00000026556	1	173931091	173958575
Nhlh1	ENSMUSG00000051251	1	173982423	173987704
Ncstn	ENSMUSG00000003458	1	173996144	174012926
Copa	ENSMUSG00000026553	1	174012660	174052461
Pex19	ENSMUSG00000003464	1	174056886	174066624
Dcaf8	ENSMUSG00000026554	1	174078146	174126524
Pea15a	ENSMUSG00000013698	1	174126859	174136935
Casq1	ENSMUSG00000007122	1	174140025	174150026
Atp1a4	ENSMUSG00000007107	1	174153644	174188545
Igsf8	ENSMUSG00000038034	1	174191772	174249972
Atp1a2	ENSMUSG00000007097	1	174201840	174228195
Kcnj9	ENSMUSG00000038026	1	174251164	174259394
Kcnj10	ENSMUSG00000044708	1	174271341	174304216
Pigm	ENSMUSG00000050229	1	174306662	174314230
Slamf9	ENSMUSG00000026548	1	174405489	174408706
Igsf9	ENSMUSG00000037995	1	174411919	174429009
Tagln2	ENSMUSG00000026547	1	174430178	174437511
Ccdc19	ENSMUSG00000026546	1	174451175	174476001
Vsig8	ENSMUSG00000049598	1	174486069	174493848
Slamf8	ENSMUSG00000053318	1	174511508	174520699
Fcrl6	ENSMUSG00000070504	1	174526771	174532682
Dusp23	ENSMUSG00000026544	1	174560900	174563105
Crp	ENSMUSG00000037942	1	174628187	174630097
Apcs	ENSMUSG00000026542	1	174824093	174825185
Olfr16	ENSMUSG00000037924	1	174886899	174887948
Gm15431	ENSMUSG00000059058	1	173641219	173641413
Gm10171	ENSMUSG00000089803	1	174074403	174075032
Gm17224	ENSMUSG00000092085	1	174143152	174143811
4933439K11Rik	ENSMUSG00000085184	1	174468264	174488260
Gm17520	ENSMUSG00000092117	1	173353316	173367449
U5	ENSMUSG00000065033	1	173433179	173433294
7SK	ENSMUSG00000088813	1	174614646	174614972
U6	ENSMUSG00000065390	1	173663430	173663536
SNORA40	ENSMUSG00000087747	1	173238178	173238268
U6	ENSMUSG00000088291	1	173662191	173662245
SNORA17	ENSMUSG00000077252	1	174866343	174866465
U1	ENSMUSG00000065905	1	172958096	172958260
U6	ENSMUSG00000070182	1	174773665	174773769
Olfr1408	ENSMUSG00000062527	1	175060331	175061367
Olfr1407-ps1	ENSMUSG00000066680	1	175080262	175080503
Olfr1406	ENSMUSG00000058981	1	175113573	175114635
Olfr218	ENSMUSG00000046643	1	175133489	175134430
Olfr1404	ENSMUSG00000049456	1	175145738	175146771
Fcer1a	ENSMUSG00000005339	1	175151402	175157360
Olfr418-ps1	ENSMUSG00000049605	1	175200278	175201268
Gm11062	ENSMUSG00000079180	1	175204592	175207853
Darc	ENSMUSG00000037872	1	175262017	175263634
Cadm3	ENSMUSG00000005338	1	175264385	175297826
Aim2	ENSMUSG00000037860	1	175281010	175396171
Gm4955	ENSMUSG00000037849	1	175398640	175421172
BC094916	ENSMUSG00000070501	1	175449848	175466088
Pydc4	ENSMUSG00000073491	1	175497204	175529405
Pyhin1	ENSMUSG00000043263	1	175560990	175578059
Pydc3	ENSMUSG00000066677	1	175604042	175628523
AI607873	ENSMUSG00000073490	1	175653814	175671878
Ifi204	ENSMUSG00000073489	1	175677424	175697050
Mndal	ENSMUSG00000090272	1	175787352	175872622
Mnda	ENSMUSG00000026536	1	175826486	175843053
Ifi203	ENSMUSG00000039997	1	175850538	175872803
Ifi202b	ENSMUSG00000026535	1	175892700	175912975
Ifi205	ENSMUSG00000054203	1	175942129	175961886
Olfr433	ENSMUSG00000045381	1	175972064	175973067
Olfr432	ENSMUSG00000047048	1	175980506	175981444
Olfr430	ENSMUSG00000050134	1	175999431	176000384
Olfr429	ENSMUSG00000049528	1	176019169	176020111
Olfr427	ENSMUSG00000059371	1	176029591	176030538
Olfr231	ENSMUSG00000046486	1	176047222	176048145
Olfr424	ENSMUSG00000051528	1	176066877	176067824
Olfr421	ENSMUSG00000091950	1	176081612	176082661
Olfr420	ENSMUSG00000055033	1	176088853	176089898
Spna1	ENSMUSG00000026532	1	176102907	176178581
Olfr419	ENSMUSG00000050788	1	176180020	176181107
1810030J14Rik	ENSMUSG00000026531	1	176260649	176263004
Olfr417	ENSMUSG00000066672	1	176299050	176299979
Olfr248	ENSMUSG00000059503	1	176321177	176322186
Olfr414	ENSMUSG00000051509	1	176360561	176361515
Olfr220	ENSMUSG00000066671	1	176378756	176379733
Fmn2	ENSMUSG00000028354	1	176431956	176752848
Gm16340	ENSMUSG00000090222	1	175705968	175732851
Grem2	ENSMUSG00000050069	1	176763916	176851950
Rgs7	ENSMUSG00000026527	1	176989867	177421261
Fh1	ENSMUSG00000026526	1	177530505	177555766
Kmo	ENSMUSG00000039783	1	177550512	177592247
Opn3	ENSMUSG00000026525	1	177592552	177622907
Chml	ENSMUSG00000078185	1	177616619	177618484
Wdr64	ENSMUSG00000026523	1	177628724	177745865
U2	ENSMUSG00000077794	1	177730645	177730820
Cdc42bpa	ENSMUSG00000026490	1	181890603	182095734
Adck3	ENSMUSG00000026489	1	182095369	182129733
Psen2	ENSMUSG00000010609	1	182157135	182193569
Gm5069	ENSMUSG00000055676	1	182257102	182260681
Itpkb	ENSMUSG00000038855	1	182260607	182354933
6330403A02Rik	ENSMUSG00000053963	1	182362518	182413598
Parp1	ENSMUSG00000026496	1	182499086	182531384
Lin9	ENSMUSG00000058729	1	182571498	182620816
Mixl1	ENSMUSG00000026497	1	182623174	182627165
Acbd3	ENSMUSG00000026499	1	182656174	182684334
H3f3a	ENSMUSG00000060743	1	182730963	182744074
BC031781	ENSMUSG00000038806	1	182781282	182798228
Lefty2	ENSMUSG00000066652	1	182823239	182829234
Pycr2	ENSMUSG00000026520	1	182834405	182838218
Lefty1	ENSMUSG00000038793	1	182865153	182868531
Tmem63a	ENSMUSG00000026519	1	182872475	182905243
Ephx1	ENSMUSG00000038776	1	182906286	182951035
9130409I23Rik	ENSMUSG00000038768	1	182981368	182990798
Nvl	ENSMUSG00000026516	1	183023554	183074288
Cnih4	ENSMUSG00000062169	1	183081062	183099125
Wdr26	ENSMUSG00000038733	1	183103359	183142109
A430110L20Rik	ENSMUSG00000054135	1	183156207	183158621
Cnih3	ENSMUSG00000026514	1	183282759	183390772
Ccdc121	ENSMUSG00000050625	1	183439764	183441582
Dnahc14	ENSMUSG00000047369	1	183669119	183699805
Lbr	ENSMUSG00000004880	1	183745447	183772532
Gm5533	ENSMUSG00000056699	1	183781739	183783320
Enah	ENSMUSG00000022995	1	183834576	183950111
Gm17275	ENSMUSG00000090986	1	182732699	182739614
2210411M09Rik	ENSMUSG00000085563	1	182882195	182888280
Rpl35a-ps2	ENSMUSG00000081214	1	183172076	183172498
Gm16067	ENSMUSG00000073485	1	182743907	182746990
Gm16547	ENSMUSG00000089888	1	183330595	183330887
Gm16539	ENSMUSG00000089927	1	183361854	183362531
U6	ENSMUSG00000064970	1	183743738	183743831
U6	ENSMUSG00000084558	1	182762900	182763007
AC167020.1	ENSMUSG00000092967	1	182663926	182664013
5S_rRNA	ENSMUSG00000089429	1	183770584	183770699
Srp9	ENSMUSG00000026511	1	184054868	184062538
Vmn1r1	ENSMUSG00000091013	1	184087275	184088450
Tlr5	ENSMUSG00000079164	1	184884919	184906175
Gm8214	ENSMUSG00000090533	1	185505657	185506073
Dusp10	ENSMUSG00000039384	1	185837181	185899515
1700056E22Rik	ENSMUSG00000044854	1	185856911	185857453
Hlx	ENSMUSG00000039377	1	186551019	186556498
Mosc1	ENSMUSG00000026621	1	186610655	186635192
Mosc2	ENSMUSG00000073481	1	186636947	186670330
C130074G19Rik	ENSMUSG00000039349	1	186695805	186707097
Mark1	ENSMUSG00000026620	1	186720322	186823428
Rpl21-ps1	ENSMUSG00000059483	1	186441127	186441609
4930488B22Rik	ENSMUSG00000092578	1	186536376	186542868
U6	ENSMUSG00000089057	1	186403988	186404085
7SK	ENSMUSG00000088562	1	186681959	186682291
Mir1981	ENSMUSG00000088559	1	186646286	186646367
Rab3gap2	ENSMUSG00000039318	1	187028047	187110622
Iars2	ENSMUSG00000026618	1	187108605	187153275
Bpnt1	ENSMUSG00000026617	1	187156028	187181656
Eprs	ENSMUSG00000026615	1	187186974	187252234
Slc30a10	ENSMUSG00000026614	1	187278727	187292641
Gm2061	ENSMUSG00000085692	1	187270995	187279447
9630028B13Rik	ENSMUSG00000051295	1	187253236	187265698
4930532G15Rik	ENSMUSG00000091047	1	187183340	187186744
Snora36b	ENSMUSG00000077571	1	187066786	187066917
Mir194-1	ENSMUSG00000065581	1	187137198	187137264
Mir215	ENSMUSG00000065562	1	187137460	187137571
Ush2a	ENSMUSG00000026609	1	190085902	190788920
Kctd3	ENSMUSG00000026608	1	190794977	190831719
Kcnk2	ENSMUSG00000037624	1	191031816	191167711
Cenpf	ENSMUSG00000026605	1	191464478	191511965
Ptpn14	ENSMUSG00000026604	1	191552147	191700574
Smyd2	ENSMUSG00000026603	1	191704371	191746242
Prox1	ENSMUSG00000010175	1	191941917	191994559
Rps6kc1	ENSMUSG00000089872	1	192524081	192735649
Gm17653	ENSMUSG00000090445	1	191657020	191660499
Gm17566	ENSMUSG00000079045	1	191994175	192041155
mmu-mir-1194	ENSMUSG00000080505	1	191217229	191217349
AC124613.1	ENSMUSG00000093064	1	192306751	192307036
U6	ENSMUSG00000084550	1	190584355	190584458
Plxna2	ENSMUSG00000026640	1	196446023	196643063
Cd34	ENSMUSG00000016494	1	196765015	196787486
Cd46	ENSMUSG00000016493	1	196867479	196918442
Cr1l	ENSMUSG00000016481	1	196929983	196957764
Cr2	ENSMUSG00000026616	1	196963005	197002909
A330023F24Rik	ENSMUSG00000073474	1	196802569	196864102
4631405K08Rik	ENSMUSG00000091593	1	195333432	195335997
Gm16897	ENSMUSG00000086469	1	196781953	196803153
7SK	ENSMUSG00000084631	1	196684851	196685144
Mir205	ENSMUSG00000065533	1	195333657	195333724
Mir29c	ENSMUSG00000065548	1	196863741	196863828
Mir29b-2	ENSMUSG00000065412	1	196863234	196863314
AC109145.1	ENSMUSG00000080633	1	197054472	197054592
Mir3962	ENSMUSG00000092633	1	196648195	196648258
Fam171a1	ENSMUSG00000050530	2	3031496	3145078
Nmt2	ENSMUSG00000026643	2	3201484	3246149
Rpp38	ENSMUSG00000049950	2	3246221	3249915
Acbd7	ENSMUSG00000026644	2	3253440	3258265
Olah	ENSMUSG00000026645	2	3259254	3283863
Meig1	ENSMUSG00000026650	2	3326315	3339920
Dclre1c	ENSMUSG00000026648	2	3341403	3381402
Suv39h2	ENSMUSG00000026646	2	3373087	3392303
Hspa14	ENSMUSG00000051396	2	3406122	3430086
Hspa14	ENSMUSG00000079615	2	3421801	3430031
Cdnf	ENSMUSG00000039496	2	3430302	3443648
Fam107b	ENSMUSG00000026655	2	3531030	3699414
Frmd4a	ENSMUSG00000026657	2	3938763	4535089
Gm13184	ENSMUSG00000085043	2	3385885	3391818
Gm13186	ENSMUSG00000081278	2	3448557	3448872
Gm13182	ENSMUSG00000082580	2	3468009	3468466
Gm13183	ENSMUSG00000080703	2	3597074	3597862
Gm13181	ENSMUSG00000081070	2	3603634	3604702
Gm13185	ENSMUSG00000085205	2	3670258	3672449
Gm13180	ENSMUSG00000085656	2	3772302	3794847
Gm13191	ENSMUSG00000086445	2	3843080	3846411
Gm2639	ENSMUSG00000086458	2	3972309	3973605
Gm13188	ENSMUSG00000081889	2	4002901	4003464
1700080N15Rik	ENSMUSG00000084859	2	4053109	4062187
Gm13189	ENSMUSG00000086921	2	4058820	4065148
U4	ENSMUSG00000075837	2	3208650	3208790
Gm13187	ENSMUSG00000087355	2	4208641	4222213
U6	ENSMUSG00000075826	2	4302007	4302113
Prpf18	ENSMUSG00000039449	2	4543104	4573159
Gm13175	ENSMUSG00000086874	2	4379480	4387716
Gm13179	ENSMUSG00000086018	2	4507070	4508333
Bend7	ENSMUSG00000048186	2	4638877	4723188
Gm13196	ENSMUSG00000083378	2	4621284	4621662
Gm13176	ENSMUSG00000083407	2	4755182	4755658
Sephs1	ENSMUSG00000026662	2	4802610	4831603
AL807778.1	ENSMUSG00000092757	2	4815438	4815516
Phyh	ENSMUSG00000026664	2	4840065	4859776
Ucma	ENSMUSG00000026668	2	4897168	4906794
Mcm10	ENSMUSG00000026669	2	4910760	4933837
Optn	ENSMUSG00000026672	2	4941688	4985097
Gm13194	ENSMUSG00000086670	2	4863220	4863530
Gm13193	ENSMUSG00000082795	2	4877115	4877339
Gm13192	ENSMUSG00000069188	2	4880509	4880822
4930551O13Rik	ENSMUSG00000086430	2	4958326	4962179
Ccdc3	ENSMUSG00000026676	2	5058822	5151924
Gm16934	ENSMUSG00000087583	2	5058795	5151910
Gm13198	ENSMUSG00000081005	2	5077438	5078263
U2	ENSMUSG00000084606	2	5180975	5181161
Gm13197	ENSMUSG00000080820	2	5204696	5204920
Camk1d	ENSMUSG00000039145	2	5214503	5635561
Cdc123	ENSMUSG00000039128	2	5715340	5766210
Nudt5	ENSMUSG00000025817	2	5766065	5792941
Gm13199	ENSMUSG00000056718	2	5783126	5783980
Sec61a2	ENSMUSG00000025816	2	5792033	5816478
Dhtkd1	ENSMUSG00000025815	2	5817161	5863838
Upf2	ENSMUSG00000043241	2	5872515	5977749
5430407P10Rik	ENSMUSG00000045319	2	6021071	6051257
Echdc3	ENSMUSG00000039063	2	6109511	6134079
Gm13216	ENSMUSG00000082013	2	5524617	5525207
Gm13267	ENSMUSG00000085818	2	5816556	5821177
Gm13384	ENSMUSG00000082332	2	6053254	6055002
A230108P19Rik	ENSMUSG00000087125	2	6114297	6242657
Gm13383	ENSMUSG00000087485	2	6176992	6178312
Usp6nl	ENSMUSG00000039046	2	6243713	6367436
Celf2	ENSMUSG00000002107	2	6460751	7002348
Gm10855	ENSMUSG00000075538	2	6853587	6856127
Gm10115	ENSMUSG00000062319	2	6871499	6872726
Gm13388	ENSMUSG00000085716	2	6352832	6357079
Gm13391	ENSMUSG00000086109	2	6393046	6399665
Gm13389	ENSMUSG00000087079	2	6805316	6807970
Gm17437	ENSMUSG00000091136	2	6998311	7002359
7SK	ENSMUSG00000065824	2	6997140	6997460
Gm13390	ENSMUSG00000087656	2	7317485	7317627
U6	ENSMUSG00000077396	2	7271724	7271820
Gm13210	ENSMUSG00000083252	2	7552703	7552975
Gm13211	ENSMUSG00000085070	2	7637778	7703035
Gata3	ENSMUSG00000015619	2	9778705	9811661
4930412O13Rik	ENSMUSG00000025783	2	9802879	9805548
9230102O04Rik	ENSMUSG00000079602	2	9804668	9811167
Taf3	ENSMUSG00000025782	2	9836179	9970223
Atp5c1	ENSMUSG00000025781	2	9977643	10002137
Kin	ENSMUSG00000037262	2	10002220	10014433
Itih2	ENSMUSG00000037254	2	10016218	10053023
Itih5	ENSMUSG00000025780	2	10075198	10178156
Sfmbt2	ENSMUSG00000061186	2	10292137	10516880
Gm13255	ENSMUSG00000084374	2	8555564	8556110
Gm13217	ENSMUSG00000082953	2	8962744	8964111
1700061F12Rik	ENSMUSG00000085580	2	9111142	9119104
Gm13221	ENSMUSG00000083423	2	9191707	9192136
Gm13219	ENSMUSG00000079604	2	9274058	9369303
Gm13220	ENSMUSG00000081202	2	9497463	9497970
Gm13218	ENSMUSG00000079603	2	9512846	9519470
Gm13256	ENSMUSG00000086618	2	9798883	9800496
Gm13262	ENSMUSG00000075534	2	9827805	9836305
Gm13261	ENSMUSG00000086748	2	10260910	10295668
SNORA17	ENSMUSG00000077733	2	9997280	9997407
7SK	ENSMUSG00000088574	2	8393721	8394011
Gm10852	ENSMUSG00000075532	2	10636794	10639296
Mir467b	ENSMUSG00000076044	2	10402875	10402947
AL772216.42	ENSMUSG00000092961	2	10432088	10432190
AL772216.29	ENSMUSG00000080612	2	10414048	10414173
AL772216.34	ENSMUSG00000080649	2	10420831	10420953
Mir669c	ENSMUSG00000076118	2	10430923	10431031
mmu-mir-297a-5	ENSMUSG00000076983	2	10393881	10393970
Mir669d	ENSMUSG00000077834	2	10389970	10390090
AL772216.23	ENSMUSG00000080558	2	10430080	10430206
Mir466d	ENSMUSG00000078031	2	10433594	10433689
AL772216.10	ENSMUSG00000080422	2	10418418	10418541
AL772216.8	ENSMUSG00000080405	2	10404439	10404558
Mir669a-5	ENSMUSG00000076025	2	10403384	10403480
Mir669m-1	ENSMUSG00000089570	2	10434417	10434514
Mir467e	ENSMUSG00000076948	2	10427348	10427434
AL772216.38	ENSMUSG00000080686	2	10438964	10439053
AL772216.37	ENSMUSG00000080685	2	10406877	10406996
Mir467a-2	ENSMUSG00000076161	2	10400425	10400507
AL772216.6	ENSMUSG00000080382	2	10415948	10416070
AL772216.24	ENSMUSG00000080567	2	10406678	10406803
Mir297a-3	ENSMUSG00000076956	2	10437447	10437548
Mir466b-2	ENSMUSG00000076966	2	10420312	10420393
Mir297c	ENSMUSG00000076976	2	10430643	10430740
AL772216.19	ENSMUSG00000080521	2	10409331	10409451
Mir466c-2	ENSMUSG00000077140	2	10405593	10405682
Mir669a-9	ENSMUSG00000076021	2	10415651	10415747
AL772216.12	ENSMUSG00000080444	2	10401992	10402112
AL772216.31	ENSMUSG00000080627	2	10387387	10387494
Mir467a-3	ENSMUSG00000077054	2	10405305	10405387
Mir669a-10	ENSMUSG00000076020	2	10420534	10420630
Mir669a-8	ENSMUSG00000076022	2	10413189	10413285
Mir297b	ENSMUSG00000076222	2	10433294	10433402
Mir467a-10	ENSMUSG00000077033	2	10424900	10424982
Mir669a-7	ENSMUSG00000076023	2	10408276	10408372
Mir466g	ENSMUSG00000078025	2	10436222	10436301
Mir466p	ENSMUSG00000077113	2	10427633	10427721
Mir466b-5	ENSMUSG00000076992	2	10410514	10410601
Mir466b-8	ENSMUSG00000077098	2	10398255	10398340
Mir466f-3	ENSMUSG00000077981	2	10393580	10393673
Mir466m	ENSMUSG00000092793	2	10388290	10388373
Mir467a-9	ENSMUSG00000076156	2	10420020	10420102
AL772216.30	ENSMUSG00000080624	2	10428382	10428482
mmu-mir-466b-1	ENSMUSG00000077028	2	10422736	10422825
Mir669h	ENSMUSG00000080594	2	10439782	10439906
Mir467a-6	ENSMUSG00000076986	2	10412675	10412757
Mir466f-2	ENSMUSG00000077998	2	10390302	10390395
Mir467a-7	ENSMUSG00000076158	2	10415137	10415219
AL772216.27	ENSMUSG00000080599	2	10418979	10419104
AL772216.1	ENSMUSG00000077095	2	10431211	10431314
Mir669i	ENSMUSG00000080657	2	10439231	10439357
Mir669a-4	ENSMUSG00000076026	2	10400938	10401034
Mir669b	ENSMUSG00000076126	2	10389417	10389513
AL772216.33	ENSMUSG00000080641	2	10424018	10424138
AL772216.17	ENSMUSG00000080493	2	10413487	10413610
Mir669p-1	ENSMUSG00000077072	2	10410743	10410829
Mir466l	ENSMUSG00000078060	2	10437724	10437844
Mir466b-1	ENSMUSG00000076955	2	10395842	10395931
Mir466b-4	ENSMUSG00000077035	2	10408050	10408139
AL772216.41	ENSMUSG00000092882	2	10428182	10428308
Mir467a-5	ENSMUSG00000076159	2	10410226	10410308
Mir466e	ENSMUSG00000077071	2	10400713	10400798
AL772216.3	ENSMUSG00000077131	2	10389696	10389799
Mir669m-2	ENSMUSG00000088980	2	10435061	10435158
Mir467a-8	ENSMUSG00000076157	2	10417607	10417689
AL772216.9	ENSMUSG00000080418	2	10416509	10416635
AL772216.13	ENSMUSG00000080472	2	10406117	10406240
AL772216.35	ENSMUSG00000080674	2	10401792	10401918
Mir669a-6	ENSMUSG00000076024	2	10405819	10405915
Mir467d	ENSMUSG00000077021	2	10429257	10429341
Mir669d-2	ENSMUSG00000080504	2	10393271	10393356
AL772216.43	ENSMUSG00000093308	2	10394978	10395104
AL772216.32	ENSMUSG00000080640	2	10411598	10411723
Mir669a-3	ENSMUSG00000076028	2	10396060	10396168
AL772216.5	ENSMUSG00000080362	2	10414247	10414366
Mir466n	ENSMUSG00000077991	2	10435368	10435461
AL772216.36	ENSMUSG00000080684	2	10423260	10423381
Mir467a-1	ENSMUSG00000076162	2	10397973	10398045
AL772216.18	ENSMUSG00000080500	2	10386914	10387034
Mir466b-6	ENSMUSG00000077060	2	10415425	10415514
mmu-mir-467a	ENSMUSG00000076155	2	10422449	10422531
Mir669k	ENSMUSG00000080652	2	10396927	10397036
Mir466b-3	ENSMUSG00000076994	2	10425192	10425272
Mir467c	ENSMUSG00000077049	2	10395558	10395654
Mir466b-7	ENSMUSG00000077088	2	10417895	10417982
Mir669a-12	ENSMUSG00000076019	2	10425414	10425510
mmu-mir-669k	ENSMUSG00000080466	2	10423818	10423944
Mir466f-1	ENSMUSG00000077972	2	10388571	10388664
Mir669j	ENSMUSG00000080611	2	10399537	10399657
AL772216.16	ENSMUSG00000080488	2	10404239	10404365
Mir669a-2	ENSMUSG00000076014	2	10431791	10431887
AL772216.15	ENSMUSG00000080477	2	10411794	10411914
AL772216.39	ENSMUSG00000088833	2	10432997	10433092
AL772216.2	ENSMUSG00000077104	2	10431512	10431611
Mir669e	ENSMUSG00000080653	2	10389122	10389240
Mir669o	ENSMUSG00000077086	2	10435927	10436022
Mir669a-11	ENSMUSG00000076017	2	10422962	10423058
AL772216.25	ENSMUSG00000080571	2	10408573	10408695
AL772216.21	ENSMUSG00000080550	2	10426274	10426400
AL772216.4	ENSMUSG00000080332	2	10421390	10421516
Mir4660	ENSMUSG00000078026	2	10394167	10394250
AL772216.22	ENSMUSG00000080554	2	10416706	10416826
Mir297a-4	ENSMUSG00000077954	2	10438694	10438791
Mir669f	ENSMUSG00000077038	2	10388856	10388976
Mir466c-1	ENSMUSG00000077136	2	10403158	10403247
AL772216.14	ENSMUSG00000080476	2	10421593	10421710
Mir669a-1	ENSMUSG00000076027	2	10398480	10398576
Mir669p-2	ENSMUSG00000077056	2	10418124	10418210
AL772216.7	ENSMUSG00000080400	2	10397127	10397247
AL772216.20	ENSMUSG00000080548	2	10409134	10409260
Mir669g	ENSMUSG00000080459	2	10398777	10398899
mmu-mir-669a-1	ENSMUSG00000076018	2	10433830	10433926
Mir669l	ENSMUSG00000076959	2	10390598	10390695
AL772216.26	ENSMUSG00000080598	2	10411037	10411160
AL772216.40	ENSMUSG00000092697	2	10432418	10432519
AL772216.11	ENSMUSG00000080442	2	10419175	10419295
Mir466h	ENSMUSG00000077941	2	10436518	10436598
mmu-mir-466c	ENSMUSG00000076979	2	10412963	10413052
AL772216.28	ENSMUSG00000080604	2	10399337	10399463
Mir467a-4	ENSMUSG00000076160	2	10407762	10407844
Mir466	ENSMUSG00000070099	2	10429545	10429617
Gm13265	ENSMUSG00000081367	2	10820293	10820675
Gm13263	ENSMUSG00000082871	2	10880755	10881550
SNORA68	ENSMUSG00000089007	2	10936389	10936517
Gm13264	ENSMUSG00000085257	2	10958501	10970693
Gm13297	ENSMUSG00000081693	2	11012506	11013391
Gm13294	ENSMUSG00000083900	2	11021415	11021891
U4	ENSMUSG00000084560	2	11009408	11009540
Prkcq	ENSMUSG00000026778	2	11093740	11222853
Gm13293	ENSMUSG00000086006	2	11261116	11264239
Gm13295	ENSMUSG00000080905	2	11274141	11274396
Gm13291	ENSMUSG00000086491	2	11306630	11308691
Gm13292	ENSMUSG00000082424	2	11330657	11331658
Gm13296	ENSMUSG00000082314	2	11341849	11342863
Pfkfb3	ENSMUSG00000026773	2	11393057	11423728
Rbm17	ENSMUSG00000037197	2	11507066	11525780
Gm17355	ENSMUSG00000091689	2	11546914	11546967
Gm17490	ENSMUSG00000091312	2	11547233	11547891
Il2ra	ENSMUSG00000026770	2	11564419	11614818
Gm13260	ENSMUSG00000082727	2	11529041	11529909
Il15ra	ENSMUSG00000023206	2	11626914	11655613
Fbxo18	ENSMUSG00000058594	2	11664200	11699209
Ankrd16	ENSMUSG00000047909	2	11699503	11711952
Msrb2	ENSMUSG00000023094	2	19293067	19316603
Ptf1a	ENSMUSG00000026735	2	19367290	19369128
4921504E06Rik	ENSMUSG00000026734	2	19384464	19475541
Otud1	ENSMUSG00000043415	2	19579689	19582217
Etl4	ENSMUSG00000036617	2	19831407	20732340
Arhgap21	ENSMUSG00000036591	2	20769546	20890508
Enkur	ENSMUSG00000026679	2	21102358	21126992
Thnsl1	ENSMUSG00000048550	2	21127351	21136636
Gpr158	ENSMUSG00000045967	2	21289169	21752174
Gm13344	ENSMUSG00000087103	2	19350731	19353610
Gm13336	ENSMUSG00000085388	2	19363135	19368301
1810010K12Rik	ENSMUSG00000056329	2	19373455	19376622
Gm13345	ENSMUSG00000084160	2	19430717	19430944
Gm13348	ENSMUSG00000086621	2	19555661	19558613
Gm13343	ENSMUSG00000080227	2	19573871	19573975
Gm13346	ENSMUSG00000087246	2	19598338	19607784
Gm13347	ENSMUSG00000083893	2	19598878	19600230
Gm13361	ENSMUSG00000083777	2	19887594	19889024
Gm13363	ENSMUSG00000060795	2	19914548	19915069
Gm13360	ENSMUSG00000082164	2	19958723	19959521
Gm13328	ENSMUSG00000081128	2	20156672	20157691
Gm17171	ENSMUSG00000091457	2	20222444	20246297
Gm13335	ENSMUSG00000085477	2	20342197	20354561
Gm13362	ENSMUSG00000086418	2	20631002	20634861
Gm13380	ENSMUSG00000085206	2	20843487	20853016
Gm13375	ENSMUSG00000075514	2	20890681	20891624
Gm13377	ENSMUSG00000086821	2	20966435	21063581
Gm13376	ENSMUSG00000087219	2	21018726	21042286
Gm13378	ENSMUSG00000084071	2	21165732	21166067
Gm13327	ENSMUSG00000085680	2	21263552	21290738
5S_rRNA	ENSMUSG00000089472	2	21092710	21092840
U6	ENSMUSG00000065253	2	20202146	20202252
SNORA32	ENSMUSG00000065644	2	19856490	19856580
SNORA17	ENSMUSG00000077342	2	19612915	19613046
7SK	ENSMUSG00000089576	2	21119317	21119493
Myo3a	ENSMUSG00000025716	2	22149130	22473772
Gad2	ENSMUSG00000026787	2	22477725	22549394
Apbb1ip	ENSMUSG00000026786	2	22629614	22731173
Gm13341	ENSMUSG00000083863	2	22442811	22443482
Gm13340	ENSMUSG00000083563	2	22443623	22445167
Gm13339	ENSMUSG00000082884	2	22445544	22446053
Gm13338	ENSMUSG00000083453	2	22569031	22569391
1700092C17Rik	ENSMUSG00000085353	2	22611504	22617793
Gm13356	ENSMUSG00000083057	2	22618264	22618598
A130006I12Rik	ENSMUSG00000069136	2	22750841	22751256
Gm14441	ENSMUSG00000081861	2	22768813	22769352
Gm17390	ENSMUSG00000090924	2	22786860	22789102
Gm13357	ENSMUSG00000083650	2	22874651	22875187
Gm13423	ENSMUSG00000081648	2	23057553	23059203
Gm13422	ENSMUSG00000084098	2	23090756	23091259
Gm13331	ENSMUSG00000081519	2	23364380	23364827
Sh3d2c-ps1	ENSMUSG00000083729	2	23535738	23536641
Gm13382	ENSMUSG00000084075	2	23731550	23731681
Gm13392	ENSMUSG00000083373	2	23763961	23764110
Gm13410	ENSMUSG00000083116	2	24034354	24035837
Gm13409	ENSMUSG00000083172	2	24117350	24121858
Gm13411	ENSMUSG00000085999	2	24177944	24178476
Gm13415	ENSMUSG00000085057	2	24295938	24342375
Gm13418	ENSMUSG00000082307	2	24349588	24350531
Pdss1	ENSMUSG00000026784	2	22751042	22795786
Abi1	ENSMUSG00000058835	2	22795593	22895761
Acbd5	ENSMUSG00000026781	2	22923688	22970030
Mastl	ENSMUSG00000026779	2	22971126	23011544
Yme1l1	ENSMUSG00000026775	2	23011889	23054780
4931423N10Rik	ENSMUSG00000026774	2	23062996	23122649
Nxph2	ENSMUSG00000069132	2	23176766	23257493
Spopl	ENSMUSG00000026771	2	23361740	23427626
Hnmt	ENSMUSG00000026986	2	23858430	23904914
Tbpl2	ENSMUSG00000061809	2	23927241	23952115
Il1f8	ENSMUSG00000026985	2	24008681	24016039
Il1f9	ENSMUSG00000044103	2	24041996	24049088
Il1f6	ENSMUSG00000026984	2	24070938	24081222
Il1f5	ENSMUSG00000026983	2	24132474	24138946
Il1f10	ENSMUSG00000046845	2	24146716	24149340
Il1rn	ENSMUSG00000026981	2	24192373	24207014
Psd4	ENSMUSG00000026979	2	24223100	24264702
Pax8	ENSMUSG00000026976	2	24276071	24331119
SNORA42	ENSMUSG00000084625	2	22757908	22758027
AL732528.1	ENSMUSG00000077966	2	24303584	24303678
7SK	ENSMUSG00000088368	2	23678573	23678747
AL928693.1	ENSMUSG00000092811	2	22522178	22522272
Gm13417	ENSMUSG00000085330	2	24401012	24422217
Gm13416	ENSMUSG00000084241	2	24448422	24450033
Gm13459	ENSMUSG00000083973	2	24530221	24530866
Cacna1b	ENSMUSG00000004113	2	24459407	24618672
7SK	ENSMUSG00000088571	2	24456885	24457209
Gm757	ENSMUSG00000089953	2	25089996	25092307
2310002J15Rik	ENSMUSG00000036731	2	25094347	25097972
Rnf208	ENSMUSG00000044628	2	25097775	25099782
Ndor1	ENSMUSG00000006471	2	25100340	25111542
Tmem203	ENSMUSG00000078201	2	25110959	25111872
Tprn	ENSMUSG00000048707	2	25118118	25125406
Ssna1	ENSMUSG00000026966	2	25126559	25127958
Anapc2	ENSMUSG00000026965	2	25127998	25141435
Tmem210	ENSMUSG00000026963	2	25143665	25144709
Lrrc26	ENSMUSG00000026961	2	25145435	25146700
Grin1	ENSMUSG00000026959	2	25146701	25174707
Man1b1	ENSMUSG00000036646	2	25187858	25207732
Dpp7	ENSMUSG00000026958	2	25207796	25211879
Uap1l1	ENSMUSG00000026956	2	25215409	25221202
2010317E24Rik	ENSMUSG00000026955	2	25227841	25233733
Entpd2	ENSMUSG00000015085	2	25251394	25256843
Npdc1	ENSMUSG00000015094	2	25254871	25265014
Fut7	ENSMUSG00000036587	2	25278787	25281894
Abca2	ENSMUSG00000026944	2	25284223	25304060
BC029214	ENSMUSG00000047617	2	25310661	25316614
Clic3	ENSMUSG00000015093	2	25312358	25314296
Ptgds	ENSMUSG00000015090	2	25322229	25325566
Lcn12	ENSMUSG00000026943	2	25346365	25349431
C8g	ENSMUSG00000015083	2	25354171	25357239
Fbxw5	ENSMUSG00000015095	2	25356270	25360991
Traf2	ENSMUSG00000026942	2	25373502	25402460
Edf1	ENSMUSG00000015092	2	25413367	25417602
Mamdc4	ENSMUSG00000026941	2	25418635	25430365
Phpt1	ENSMUSG00000036504	2	25428950	25430744
Gm996	ENSMUSG00000029419	2	25430936	25435619
B230208H17Rik	ENSMUSG00000015087	2	25438538	25464041
Gm13370	ENSMUSG00000084383	2	24841504	24841986
Gm13369	ENSMUSG00000083796	2	24848877	24849872
Gm13387	ENSMUSG00000087028	2	24978123	25000916
E130003G02Rik	ENSMUSG00000085830	2	25146740	25154445
Gm13433	ENSMUSG00000083043	2	25398999	25399238
Gm13432	ENSMUSG00000083528	2	25409829	25410069
Gm996	ENSMUSG00000091064	2	25432493	25435417
Ehmt1	ENSMUSG00000036893	2	24646289	24775129
Arrdc1	ENSMUSG00000026972	2	24780872	24790772
Zmynd19	ENSMUSG00000026974	2	24805312	24817595
Nelf	ENSMUSG00000006476	2	24909875	24918401
Entpd8	ENSMUSG00000036813	2	24935824	24941239
Noxa1	ENSMUSG00000036805	2	24941187	24950669
Fam166a	ENSMUSG00000026969	2	25074265	25077800
Tubb4b	ENSMUSG00000036752	2	25077680	25080222
Slc34a3	ENSMUSG00000006469	2	25084418	25089884
Wdr85	ENSMUSG00000026975	2	24817920	24827683
4933433C11Rik	ENSMUSG00000036770	2	25067727	25070157
Nrarp	ENSMUSG00000078202	2	25036278	25038850
A830007P12Rik	ENSMUSG00000059555	2	25048486	25052406
Cobra1	ENSMUSG00000013465	2	25055232	25067009
AA543186	ENSMUSG00000091706	2	25182970	25188091
Gm17550	ENSMUSG00000092018	2	25430951	25435619
Mrpl41	ENSMUSG00000036850	2	24829637	24830618
Pnpla7	ENSMUSG00000036833	2	24831553	24909577
U6	ENSMUSG00000064919	2	25064143	25064247
AL732585.1	ENSMUSG00000092845	2	24910629	24910695
U6	ENSMUSG00000089513	2	24886870	24886973
AL732525.1	ENSMUSG00000092955	2	24777160	24777415
U6	ENSMUSG00000088171	2	25195171	25195265
AL732525.2	ENSMUSG00000093190	2	24792351	24792476
U6	ENSMUSG00000065798	2	24861672	24861778
4921530D09Rik	ENSMUSG00000026940	2	25464155	25473198
Tmem141	ENSMUSG00000026939	2	25475587	25477525
Fcna	ENSMUSG00000026938	2	25480186	25483550
Lcn8	ENSMUSG00000036449	2	25508640	25511737
Lcn5	ENSMUSG00000026937	2	25513472	25517497
Lcn6	ENSMUSG00000045684	2	25532306	25537128
Gm13520	ENSMUSG00000052403	2	25463412	25487281
Lcn10	ENSMUSG00000047356	2	25538246	25541601
Lcn13	ENSMUSG00000062061	2	25555563	25558846
A230005M16Rik	ENSMUSG00000087612	2	25561370	25565236
Bmyc	ENSMUSG00000049086	2	25562399	25563237
Lcn14	ENSMUSG00000079539	2	25592529	25595617
Lcn3	ENSMUSG00000026936	2	25621089	25623619
Lcn11	ENSMUSG00000069080	2	25632537	25635799
Gm13538	ENSMUSG00000090073	2	25639460	25650170
Gm13539	ENSMUSG00000085484	2	25640137	25642542
Glt6d1	ENSMUSG00000036401	2	25649379	25671368
Lcn9	ENSMUSG00000023210	2	25678673	25681057
Sohlh1	ENSMUSG00000059625	2	25698515	25702768
Kcnt1	ENSMUSG00000058740	2	25719315	25773793
Camsap1	ENSMUSG00000026933	2	25782358	25838802
Ubac1	ENSMUSG00000036352	2	25854063	25877267
Gm13542	ENSMUSG00000082357	2	25850067	25850703
AL845455.1	ENSMUSG00000093104	2	25870115	25870267
Nacc2	ENSMUSG00000026932	2	25911055	25978740
Gm13554	ENSMUSG00000087515	2	25914530	25915795
Lhx3	ENSMUSG00000026934	2	26055732	26063809
Qsox2	ENSMUSG00000036327	2	26064157	26093045
C030048H21Rik	ENSMUSG00000090340	2	26101853	26102227
C030048H21Rik	ENSMUSG00000079537	2	26107277	26113074
4932418E24Rik	ENSMUSG00000048038	2	26127166	26150077
Gpsm1	ENSMUSG00000026930	2	26171035	26203757
Dnlz	ENSMUSG00000075467	2	26203641	26207630
Card9	ENSMUSG00000026928	2	26207696	26216438
Snapc4	ENSMUSG00000036281	2	26218285	26236173
Sdccag3	ENSMUSG00000026927	2	26238320	26244836
Pmpca	ENSMUSG00000026926	2	26244859	26252642
Inpp5e	ENSMUSG00000026925	2	26251769	26264723
Sec16a	ENSMUSG00000026924	2	26264951	26300736
Notch1	ENSMUSG00000026923	2	26313423	26372183
Egfl7	ENSMUSG00000026921	2	26435534	26448640
Gm20532	ENSMUSG00000092356	2	26442159	26491154
Agpat2	ENSMUSG00000026922	2	26448577	26459937
Fam69b	ENSMUSG00000036186	2	26483977	26492017
Lcn4	ENSMUSG00000026919	2	26523194	26526802
Abo	ENSMUSG00000015787	2	26698023	26720499
Surf6	ENSMUSG00000036160	2	26744148	26758399
Med22	ENSMUSG00000015776	2	26760782	26766197
Rpl7a	ENSMUSG00000062647	2	26766284	26768838
Surf1	ENSMUSG00000015790	2	26768903	26772050
Surf2	ENSMUSG00000014873	2	26771887	26775703
Surf4	ENSMUSG00000014867	2	26775560	26789448
Gm711	ENSMUSG00000049897	2	26789567	26809016
Rexo4	ENSMUSG00000052406	2	26809083	26819906
Adamts13	ENSMUSG00000014852	2	26828936	26865148
5930434B04Rik	ENSMUSG00000015488	2	26865446	26876609
Slc2a6	ENSMUSG00000036067	2	26876883	26883518
Tmem8c	ENSMUSG00000009214	2	26917156	26927699
Adamtsl2	ENSMUSG00000036040	2	26934899	26964501
Fam163b	ENSMUSG00000009216	2	26965900	26998011
Dbh	ENSMUSG00000000889	2	27020753	27038720
Sardh	ENSMUSG00000009614	2	27043913	27103857
Vav2	ENSMUSG00000009621	2	27117624	27282553
Brd3	ENSMUSG00000026918	2	27301099	27363182
Wdr5	ENSMUSG00000026917	2	27370677	27392055
Rxra	ENSMUSG00000015846	2	27531960	27618477
Col5a1	ENSMUSG00000026837	2	27741945	27895034
C330006A16Rik	ENSMUSG00000087679	2	25992334	25996041
1810012K08Rik	ENSMUSG00000087595	2	25994066	25995063
Gm13553	ENSMUSG00000085545	2	26042249	26047198
Gm13562	ENSMUSG00000086779	2	26208165	26227472
Gm13563	ENSMUSG00000085767	2	26237046	26244538
0610009E02Rik	ENSMUSG00000086714	2	26301216	26314910
Gm13568	ENSMUSG00000085543	2	26312664	26313836
Gm13358	ENSMUSG00000082864	2	26414145	26414713
5730588L14Rik	ENSMUSG00000086775	2	26495892	26501464
Gm13359	ENSMUSG00000082951	2	26577907	26578601
Gm13397	ENSMUSG00000083335	2	26890200	26891077
Gm13398	ENSMUSG00000087364	2	26892805	26896373
Gm13399	ENSMUSG00000085008	2	27000418	27018223
Gm17071	ENSMUSG00000091192	2	27044902	27090230
AA645442	ENSMUSG00000086669	2	27182224	27186817
Gm13421	ENSMUSG00000085929	2	27395946	27398882
2810430I11Rik	ENSMUSG00000085766	2	27738445	27742572
Snhg7	ENSMUSG00000091299	2	26492697	26495764
SNORD36	ENSMUSG00000064829	2	26767751	26767807
Snora43	ENSMUSG00000064858	2	26493368	26493494
SNORD36	ENSMUSG00000065295	2	26768050	26768120
Mir126	ENSMUSG00000065540	2	26446877	26446949
Snora17	ENSMUSG00000077192	2	26494710	26494841
AL731552.1	ENSMUSG00000076364	2	27257372	27257471
SNORD24	ENSMUSG00000065258	2	26766781	26766854
U6atac	ENSMUSG00000080538	2	27395325	27395450
SNORD36	ENSMUSG00000065146	2	26768368	26768435
Gm13372	ENSMUSG00000086560	2	27880937	27885957
Fcnb	ENSMUSG00000026835	2	27931898	27940405
Olfm1	ENSMUSG00000026833	2	28048512	28086256
Ppp1r26	ENSMUSG00000035829	2	28302320	28311028
1700007K13Rik	ENSMUSG00000026831	2	28317521	28321852
Mrps2	ENSMUSG00000035772	2	28323586	28326698
Gbgt1	ENSMUSG00000026829	2	28352411	28360935
Gm10134	ENSMUSG00000063611	2	28361615	28361995
Ralgds	ENSMUSG00000026821	2	28368645	28408601
Cel	ENSMUSG00000026818	2	28411315	28418923
Gtf3c5	ENSMUSG00000026816	2	28421831	28439271
Gm13371	ENSMUSG00000085693	2	27947552	27949034
F730016J06Rik	ENSMUSG00000086425	2	27950997	27983251
Gm13373	ENSMUSG00000087196	2	28170536	28179570
Rpsa-ps9	ENSMUSG00000082895	2	28332686	28333570
Gm13381	ENSMUSG00000087667	2	28417717	28432218
Gfi1b	ENSMUSG00000026815	2	28464970	28477502
AL772249.1	ENSMUSG00000093521	2	28296182	28296262
U6	ENSMUSG00000089055	2	28450647	28450750
AL731851.1	ENSMUSG00000078061	2	28463715	28463806
Epc2	ENSMUSG00000069495	2	49307006	49407468
Kif5c	ENSMUSG00000026764	2	49474818	49630298
Gm13481	ENSMUSG00000086353	2	47918068	48312765
Gm13471	ENSMUSG00000082278	2	47995666	47996098
Gm13482	ENSMUSG00000083966	2	48154428	48154681
Gm13472	ENSMUSG00000083866	2	48243557	48243870
Gm13489	ENSMUSG00000082114	2	48665107	48666075
Gm13510	ENSMUSG00000080937	2	49040538	49040966
Gm13509	ENSMUSG00000081272	2	49163675	49164982
Gm13508	ENSMUSG00000084177	2	49182897	49183671
Mbd5	ENSMUSG00000036792	2	48805030	49177804
Orc4	ENSMUSG00000026761	2	48758344	48805797
Acvr2a	ENSMUSG00000052155	2	48669629	48758789
U6atac	ENSMUSG00000080499	2	48239739	48239858
SNORA29	ENSMUSG00000077769	2	49253915	49254035
Gm13525	ENSMUSG00000082879	2	49536019	49536496
Lypd6b	ENSMUSG00000026765	2	49643208	49804369
Gm13480	ENSMUSG00000085357	2	49661496	49668468
Lypd6	ENSMUSG00000050447	2	49921982	50049084
Mmadhc	ENSMUSG00000026766	2	50135401	50152321
Rnd3	ENSMUSG00000017144	2	50985958	51004631
Tas2r134	ENSMUSG00000056115	2	51483031	51483927
Rbm43	ENSMUSG00000036249	2	51779968	51790683
Nmi	ENSMUSG00000026946	2	51804007	51829014
Gm13483	ENSMUSG00000085862	2	50152330	50289487
Gm13486	ENSMUSG00000082483	2	50264852	50265133
Gm13488	ENSMUSG00000081457	2	50377202	50377380
Gm13487	ENSMUSG00000083449	2	50377644	50378507
Gm13485	ENSMUSG00000085429	2	50403434	50407778
Gm13484	ENSMUSG00000082846	2	50513176	50513587
Gm13498	ENSMUSG00000083270	2	50765204	50767369
Gm13500	ENSMUSG00000081173	2	51087507	51088330
Gm13497	ENSMUSG00000086349	2	51097351	51151465
Gm13499	ENSMUSG00000086523	2	51219092	51221019
1700057H21Rik	ENSMUSG00000086007	2	51276504	51294305
Gm13494	ENSMUSG00000084334	2	51400495	51401590
Gm13491	ENSMUSG00000083472	2	51459634	51459868
Gm13490	ENSMUSG00000085014	2	51512486	51587529
Gm13492	ENSMUSG00000081484	2	51673425	51674089
Gm13493	ENSMUSG00000087701	2	51726461	51727182
Gm13495	ENSMUSG00000080782	2	51793653	51794189
SCARNA14	ENSMUSG00000089614	2	51349173	51349302
Tnfaip6	ENSMUSG00000053475	2	51893529	51912206
Rif1	ENSMUSG00000036202	2	51928357	51977903
Neb	ENSMUSG00000026950	2	51992167	52194318
AL845355.1	ENSMUSG00000089609	2	52138597	52138746
Arl5a	ENSMUSG00000036093	2	52253471	52280421
Gm13521	ENSMUSG00000081158	2	52217150	52218015
Gm13522	ENSMUSG00000086447	2	52241436	52243780
Cacnb4	ENSMUSG00000017412	2	52283845	52532350
A430018G15Rik	ENSMUSG00000085315	2	52280532	52290405
Gm13541	ENSMUSG00000082132	2	52407489	52407771
Gm13540	ENSMUSG00000025201	2	52475252	52476121
Stam2	ENSMUSG00000055371	2	52547183	52601315
Gm13548	ENSMUSG00000085815	2	52598105	52598489
Fmnl2	ENSMUSG00000036053	2	52716894	52993236
Gm17489	ENSMUSG00000090548	2	52718757	52722550
Prpf40a	ENSMUSG00000061136	2	52993738	53050318
Arl6ip6	ENSMUSG00000026960	2	53050760	53078254
U6	ENSMUSG00000088928	2	53133770	53133875
Gm13501	ENSMUSG00000082472	2	53256543	53257521
Gm13503	ENSMUSG00000080716	2	53410960	53411405
Kcnh7	ENSMUSG00000059742	2	62531471	63022344
Fign	ENSMUSG00000075324	2	63809564	63936095
Gm13575	ENSMUSG00000087702	2	64220659	64231917
Gm13577	ENSMUSG00000082127	2	64312802	64313014
Gm13576	ENSMUSG00000081065	2	64407920	64408697
U6	ENSMUSG00000065837	2	63270145	63270251
Gm1631	ENSMUSG00000064263	2	71557474	71569023
Itga6	ENSMUSG00000027111	2	71583673	71696473
Pdk1	ENSMUSG00000006494	2	71711281	71741915
Rapgef4	ENSMUSG00000049044	2	71819272	72095531
B230120H23Rik	ENSMUSG00000004085	2	72123694	72280667
Cdca7	ENSMUSG00000055612	2	72314216	72324950
Sp3	ENSMUSG00000027109	2	72774484	72818503
Gm11084	ENSMUSG00000079286	2	72809605	72824773
Ola1	ENSMUSG00000027108	2	72930858	73056981
Sp9	ENSMUSG00000068859	2	73109982	73122763
Cir1	ENSMUSG00000041777	2	73121162	73150758
Scrn3	ENSMUSG00000008226	2	73150658	73175875
Gpr155	ENSMUSG00000041762	2	73179563	73224629
Wipf1	ENSMUSG00000075284	2	73267667	73367791
Chrna1	ENSMUSG00000027107	2	73401272	73418395
Chn1	ENSMUSG00000056486	2	73448717	73613403
Gm17250	ENSMUSG00000090953	2	71586132	71588219
Gm13647	ENSMUSG00000087570	2	71575872	71583454
Gm13663	ENSMUSG00000086641	2	71585564	71588257
Gm13662	ENSMUSG00000084794	2	71587982	71597858
Gm13739	ENSMUSG00000081878	2	71600295	71600824
Gm13746	ENSMUSG00000087345	2	71794110	71795425
Gm13634	ENSMUSG00000085439	2	71935660	71986853
BB114351	ENSMUSG00000085001	2	72062745	72070359
4732447D17Rik	ENSMUSG00000086231	2	72083022	72087032
Gm13635	ENSMUSG00000084261	2	72198304	72198599
Gm13636	ENSMUSG00000081538	2	72383269	72383669
Gm13637	ENSMUSG00000080865	2	72408538	72408879
Gm13638	ENSMUSG00000083279	2	72470327	72471483
Ak3l2-ps	ENSMUSG00000081957	2	72471993	72472664
8430437L04Rik	ENSMUSG00000085252	2	72541567	72567525
6430710C18Rik	ENSMUSG00000085427	2	72583903	72651774
Hspe1-ps5	ENSMUSG00000084213	2	72793955	72794251
1700011J10Rik	ENSMUSG00000063714	2	72817481	72826734
Gm13665	ENSMUSG00000082455	2	72954796	72955332
Gm13666	ENSMUSG00000083569	2	72969802	72970600
Gm13664	ENSMUSG00000083976	2	73014668	73015012
Gm13703	ENSMUSG00000085519	2	73195325	73202390
Gm13709	ENSMUSG00000086546	2	73208966	73217354
D230022J07Rik	ENSMUSG00000087176	2	73225027	73258555
Gm13707	ENSMUSG00000085768	2	73259966	73267199
Gm13708	ENSMUSG00000086069	2	73297762	73315659
Gm13705	ENSMUSG00000086382	2	73422907	73427265
Gm13704	ENSMUSG00000086544	2	73434583	73454069
Gm13706	ENSMUSG00000085838	2	73496327	73498320
SNORA17	ENSMUSG00000088297	2	71837723	71837849
Mir5115	ENSMUSG00000092984	2	72850911	72850984
7SK	ENSMUSG00000088302	2	72165744	72166051
AL844840.1	ENSMUSG00000092851	2	72788920	72789044
AL928889.1	ENSMUSG00000092951	2	73459484	73459771
Zc3h15	ENSMUSG00000027091	2	83484592	83504779
Serping1	ENSMUSG00000023224	2	84605544	84615601
Tnks1bp1	ENSMUSG00000033955	2	84888179	84913205
Aplnr	ENSMUSG00000044338	2	84976517	84980079
Lrrc55	ENSMUSG00000075224	2	85002491	85036856
Olfr987	ENSMUSG00000075223	2	85171054	85179452
Olfr988	ENSMUSG00000075222	2	85193082	85203215
Olfr992	ENSMUSG00000075221	2	85239759	85240688
Olfr993	ENSMUSG00000075220	2	85254090	85255034
Olfr994	ENSMUSG00000075219	2	85270040	85270984
Olfr995	ENSMUSG00000075218	2	85278282	85279394
4833423E24Rik	ENSMUSG00000075217	2	85323751	85359181
Itgav	ENSMUSG00000027087	2	83564554	83647073
2700094K13Rik	ENSMUSG00000076437	2	84509375	84510927
Tmx2	ENSMUSG00000050043	2	84511473	84519297
Clp1	ENSMUSG00000027079	2	84562261	84567507
Ypel4	ENSMUSG00000034059	2	84574215	84578812
P2rx3	ENSMUSG00000027071	2	84838740	84877619
Ssrp1	ENSMUSG00000027067	2	84877355	84887266
Gm13686	ENSMUSG00000085450	2	83540814	83541273
Gm13684	ENSMUSG00000085335	2	83577939	83600022
Dnmt3l-ps1	ENSMUSG00000081801	2	83584641	83585893
Gm13698	ENSMUSG00000091063	2	83795847	83798574
Gm13693	ENSMUSG00000090496	2	83801657	83804384
Gm13695	ENSMUSG00000089658	2	83807467	83810194
Gm13696	ENSMUSG00000091152	2	83813277	83816004
Gm13694	ENSMUSG00000092146	2	83819087	83821814
Gm13697	ENSMUSG00000091729	2	83824897	83827624
Gm13691	ENSMUSG00000090524	2	83830707	83833434
Gm13692	ENSMUSG00000084359	2	83874400	83874770
Gm13702	ENSMUSG00000081980	2	83985047	83985871
Gm13711	ENSMUSG00000084198	2	84157496	84158468
Gm13710	ENSMUSG00000087362	2	84340917	84371479
Gm13718	ENSMUSG00000086598	2	84499236	84506463
4930443O20Rik	ENSMUSG00000086969	2	84913771	84926618
Gm13712	ENSMUSG00000082534	2	84996258	84998799
Gm13713	ENSMUSG00000085135	2	85000935	85033482
Gm13716	ENSMUSG00000086905	2	85037089	85038832
Gm13715	ENSMUSG00000085025	2	85073832	85083835
Gm13714	ENSMUSG00000081014	2	85108170	85108390
Olfr990-ps1	ENSMUSG00000082712	2	85228297	85229192
Med19	ENSMUSG00000027080	2	84518559	84528372
Prg2	ENSMUSG00000027073	2	84820618	84823789
Prg3	ENSMUSG00000027072	2	84828353	84834043
Ube2l6	ENSMUSG00000027078	2	84638985	84650492
Smtnl1	ENSMUSG00000027077	2	84651333	84662809
Timm10	ENSMUSG00000027076	2	84667154	84670370
Slc43a1	ENSMUSG00000027075	2	84679007	84703751
Rtn4rl2	ENSMUSG00000050896	2	84712081	84726867
Slc43a3	ENSMUSG00000027074	2	84776736	84798666
Fam171b	ENSMUSG00000048388	2	83652793	83723643
Zswim2	ENSMUSG00000034552	2	83755236	83781385
Gm13698	ENSMUSG00000075239	2	83795850	83798342
Gm13693	ENSMUSG00000075238	2	83801660	83804152
Gm13695	ENSMUSG00000075237	2	83807470	83809962
Gm13696	ENSMUSG00000079249	2	83813280	83815772
Gm13694	ENSMUSG00000079248	2	83819090	83821582
Gm13697	ENSMUSG00000079250	2	83824900	83827392
Gm13691	ENSMUSG00000079247	2	83830710	83833202
Calcrl	ENSMUSG00000059588	2	84170783	84265568
Tfpi	ENSMUSG00000027082	2	84273012	84316932
Zdhhc5	ENSMUSG00000034075	2	84528127	84555337
Ctnnd1	ENSMUSG00000034101	2	84440228	84490922
Mir130a	ENSMUSG00000065484	2	84581272	84581335
SNORA48	ENSMUSG00000087973	2	85260294	85260437
n-R5s200	ENSMUSG00000077382	2	84540905	84541017
AL772159.1	ENSMUSG00000093115	2	83990212	83990312
AL935159.1	ENSMUSG00000092843	2	84768231	84768332
Olfr1022	ENSMUSG00000057761	2	85708751	85709698
Olfr1020	ENSMUSG00000046975	2	85689577	85690655
Olfr996	ENSMUSG00000059990	2	85419372	85420439
Olfr998	ENSMUSG00000046076	2	85430667	85431678
Olfr1000	ENSMUSG00000075215	2	85448121	85449065
Olfr1002	ENSMUSG00000075214	2	85487520	85488476
Olfr154	ENSMUSG00000075212	2	85503534	85504612
Olfr1006	ENSMUSG00000075211	2	85514368	85518898
Olfr1008	ENSMUSG00000050603	2	85529588	85530529
Olfr1009	ENSMUSG00000043226	2	85561564	85562508
Olfr1012	ENSMUSG00000075210	2	85599596	85600531
Olfr1013	ENSMUSG00000053287	2	85609960	85610877
Olfr1014	ENSMUSG00000059379	2	85616743	85617660
Olfr1015	ENSMUSG00000033850	2	85625631	85626646
Olfr1016	ENSMUSG00000075209	2	85639496	85640425
Olfr1018	ENSMUSG00000043892	2	85663130	85664065
Olfr1019	ENSMUSG00000075208	2	85681014	85682393
Olfr1023	ENSMUSG00000050128	2	85726959	85728102
Olfr997-ps1	ENSMUSG00000081047	2	85425261	85426182
Olfr999-ps1	ENSMUSG00000081955	2	85441945	85442875
Olfr1001-ps1	ENSMUSG00000081328	2	85473588	85474532
Olfr1003-ps1	ENSMUSG00000082577	2	85493486	85494210
Olfr1004-ps1	ENSMUSG00000083358	2	85496420	85496873
Olfr1010	ENSMUSG00000044228	2	85593520	85594463
Olfr1017-ps1	ENSMUSG00000081057	2	85648455	85649141
Gm13720	ENSMUSG00000083029	2	85656170	85656365
Olfr1021-ps1	ENSMUSG00000082754	2	85703570	85704518
Olfr1027-ps1	ENSMUSG00000082892	2	85772302	85773643
Olfr1024	ENSMUSG00000075206	2	85744226	85745209
Olfr1025-ps1	ENSMUSG00000058884	2	85758084	85759047
Olfr1026	ENSMUSG00000042863	2	85763427	85764350
Olfr1028	ENSMUSG00000057207	2	85791222	85792196
Olfr1029	ENSMUSG00000059873	2	85815370	85816430
Olfr1030	ENSMUSG00000044923	2	85819469	85824955
Olfr1031	ENSMUSG00000043267	2	85831976	85832986
Olfr1032	ENSMUSG00000042796	2	85847935	85848867
U2	ENSMUSG00000064805	2	85725312	85725491
Olfr1033	ENSMUSG00000045392	2	85874922	85884965
Olfr1035-ps1	ENSMUSG00000083418	2	85896197	85897121
Olfr1034	ENSMUSG00000060422	2	85886608	85887623
Gm13722	ENSMUSG00000083594	2	85930493	85933558
Olfr1038-ps	ENSMUSG00000050577	2	85960381	85963194
Olfr1036	ENSMUSG00000061704	2	85914872	85915875
Olfr1037	ENSMUSG00000075205	2	85924887	85926011
Olfr1039	ENSMUSG00000075204	2	85970859	85971818
Olfr1040	ENSMUSG00000075203	2	85985948	85986889
Olfr1042	ENSMUSG00000075202	2	85999502	86000598
Olfr1043	ENSMUSG00000075201	2	86002160	86003104
Olfr52	ENSMUSG00000075199	2	86021307	86022266
Olfr1044	ENSMUSG00000075200	2	86011028	86011972
Olfr1045	ENSMUSG00000075198	2	86037960	86038907
Olfr1046	ENSMUSG00000075197	2	86056915	86057865
Olfr1047	ENSMUSG00000075196	2	86068167	86069126
Olfr1048	ENSMUSG00000075195	2	86076028	86076990
Olfr1049	ENSMUSG00000075194	2	86094922	86095848
Olfr1051	ENSMUSG00000075193	2	86115716	86116642
Olfr1050-ps1	ENSMUSG00000083969	2	86108036	86108982
Olfr1052	ENSMUSG00000047149	2	86137974	86138913
Olfr1053	ENSMUSG00000075192	2	86154500	86155441
Gm13719	ENSMUSG00000083864	2	86165798	86168726
Olfr1054	ENSMUSG00000075190	2	86172573	86173511
Olfr1055	ENSMUSG00000075189	2	86186881	86187921
Olfr1056	ENSMUSG00000075188	2	86195516	86196594
Olfr1057	ENSMUSG00000075187	2	86214620	86215567
Olfr1058	ENSMUSG00000075186	2	86225623	86226573
Gm13721	ENSMUSG00000068825	2	86237225	86238174
Olfr1063-ps1	ENSMUSG00000084117	2	86274468	86275409
Olfr1069-ps1	ENSMUSG00000080752	2	86303954	86305232
Olfr1073-ps1	ENSMUSG00000082547	2	86328075	86328962
Olfr1077-ps1	ENSMUSG00000081027	2	86365391	86366332
Olfr1078-ps1	ENSMUSG00000080924	2	86369048	86370584
Olfr1061	ENSMUSG00000075185	2	86253266	86254207
Olfr1062	ENSMUSG00000090059	2	86262876	86263831
Olfr1065	ENSMUSG00000075182	2	86285170	86286161
Olfr1066	ENSMUSG00000075181	2	86295485	86296426
Olfr228	ENSMUSG00000075180	2	86322956	86323897
Olfr1076	ENSMUSG00000060742	2	86348618	86349559
Olfr1079	ENSMUSG00000075179	2	86378123	86382637
Olfr1081-ps1	ENSMUSG00000080986	2	86407277	86408221
Olfr1080	ENSMUSG00000075178	2	86393338	86398295
Olfr1082	ENSMUSG00000079239	2	86434042	86438966
Olfr1083-ps	ENSMUSG00000068824	2	86446784	86447726
Olfr1084	ENSMUSG00000075177	2	86478922	86483732
Olfr1085	ENSMUSG00000075176	2	86497672	86498613
Olfr1086	ENSMUSG00000075175	2	86516556	86517488
Olfr1087	ENSMUSG00000075174	2	86530189	86531130
Olfr1089	ENSMUSG00000075173	2	86572832	86573767
Olfr1096-ps1	ENSMUSG00000084016	2	86712931	86713878
Gm13723	ENSMUSG00000086338	2	86713641	86714959
Olfr1103-ps1	ENSMUSG00000083147	2	86850095	86851032
Olfr1090	ENSMUSG00000075172	2	86593952	86594893
Olfr1093	ENSMUSG00000047969	2	86625889	86628078
Olfr141	ENSMUSG00000078420	2	86645941	86647154
Olfr1094	ENSMUSG00000044213	2	86668833	86669979
Olfr1095	ENSMUSG00000075171	2	86690927	86691853
Olfr1097	ENSMUSG00000075170	2	86730383	86732320
Olfr1098	ENSMUSG00000075169	2	86762734	86764655
Olfr1099	ENSMUSG00000075168	2	86798605	86799635
Olfr1100	ENSMUSG00000070875	2	86817986	86818954
Olfr1101	ENSMUSG00000075167	2	86828399	86829331
Olfr1102	ENSMUSG00000049843	2	86842089	86843151
Olfr1104	ENSMUSG00000075166	2	86861767	86862699
Olfr1105	ENSMUSG00000075165	2	86873438	86874376
Olfr1106	ENSMUSG00000075164	2	86888453	86889391
Olfr1107	ENSMUSG00000075163	2	86911306	86912380
Olfr1109	ENSMUSG00000075161	2	86932614	86933552
Olfr259	ENSMUSG00000075160	2	86947604	86948542
Gm13733	ENSMUSG00000081610	2	86963991	86964525
Olfr1110	ENSMUSG00000075159	2	86975538	86976476
Olfr1111	ENSMUSG00000075158	2	86989877	86990816
Gm13734	ENSMUSG00000089720	2	86976098	86980379
Olfr1112	ENSMUSG00000044487	2	87031846	87032802
Olfr1113	ENSMUSG00000070857	2	87052951	87054053
Olfr1115	ENSMUSG00000070856	2	87091997	87093098
Nlk-ps1	ENSMUSG00000081041	2	87004105	87007472
Gm13730	ENSMUSG00000081168	2	87040091	87041552
Gm13735	ENSMUSG00000081853	2	87076729	87077398
Gm13732	ENSMUSG00000084043	2	87105072	87105606
Olfr1116-ps	ENSMUSG00000070855	2	87108976	87109971
Gm13728	ENSMUSG00000082225	2	87119072	87119471
Olfr1117-ps1	ENSMUSG00000083706	2	87124509	87125429
Olfr1118	ENSMUSG00000089732	2	87148921	87149916
Gm13729	ENSMUSG00000083550	2	87144896	87145301
Olfr1120	ENSMUSG00000070853	2	87197583	87198593
Olfr1121	ENSMUSG00000070852	2	87211691	87212635
Gm13737	ENSMUSG00000083211	2	87163922	87164153
Gm13731	ENSMUSG00000081907	2	87173959	87174154
Olfr1122	ENSMUSG00000047594	2	87227813	87228892
Gm1826	ENSMUSG00000082028	2	87233640	87234801
Olfr1123	ENSMUSG00000043274	2	87258207	87259178
Olfr1124	ENSMUSG00000050772	2	87274646	87275602
Olfr153	ENSMUSG00000061520	2	87371953	87373210
Olfr1128	ENSMUSG00000075156	2	87384764	87385699
Olfr1129	ENSMUSG00000062272	2	87414062	87416187
Olfr1130	ENSMUSG00000059205	2	87446369	87448491
Olfr1131	ENSMUSG00000068819	2	87468622	87469551
Olfr1132	ENSMUSG00000068818	2	87474976	87475902
Olfr1133	ENSMUSG00000075155	2	87485337	87486278
Olfr1134	ENSMUSG00000075154	2	87496082	87498614
Olfr1135	ENSMUSG00000075153	2	87511590	87512522
Olfr1136	ENSMUSG00000075151	2	87533048	87534104
Olfr1137	ENSMUSG00000075150	2	87551129	87552061
Olfr1138	ENSMUSG00000075149	2	87577544	87578479
Olfr1140	ENSMUSG00000068817	2	87586318	87587395
Olfr1141	ENSMUSG00000075148	2	87593213	87594148
Olfr152	ENSMUSG00000068816	2	87622693	87623643
Olfr1143	ENSMUSG00000068815	2	87642548	87643492
Olfr1145	ENSMUSG00000068814	2	87649979	87650956
Olfr1148	ENSMUSG00000061875	2	87673198	87674142
Olfr1151	ENSMUSG00000047039	2	87697334	87698260
Olfr1126	ENSMUSG00000058194	2	87297324	87298268
Pramel7	ENSMUSG00000025839	2	87329244	87337250
Gm13738	ENSMUSG00000081762	2	87357189	87357657
Olfr1127-ps1	ENSMUSG00000083267	2	87363669	87364524
Gm13736	ENSMUSG00000082908	2	87366301	87366561
Gm13740	ENSMUSG00000082417	2	87387050	87387359
Gm13744	ENSMUSG00000081132	2	87400077	87400926
Gm13743	ENSMUSG00000083688	2	87403154	87403877
Gm13742	ENSMUSG00000082428	2	87480494	87480950
Gm13741	ENSMUSG00000090018	2	87496668	87498614
Olfr1144-ps1	ENSMUSG00000082227	2	87648515	87648833
Olfr1146-ps1	ENSMUSG00000083185	2	87656688	87657609
Olfr1147-ps1	ENSMUSG00000081908	2	87662767	87663703
Olfr1149-ps1	ENSMUSG00000082982	2	87680136	87680580
Olfr1150-ps1	ENSMUSG00000081234	2	87686430	87687366
Pramel6	ENSMUSG00000025838	2	87346722	87351029
Olfr1152	ENSMUSG00000045225	2	87708150	87709082
Olfr1153	ENSMUSG00000048197	2	87736334	87737290
Olfr1154	ENSMUSG00000075146	2	87742899	87743831
Olfr1155	ENSMUSG00000075145	2	87782839	87783783
Gm13745	ENSMUSG00000082056	2	87711838	87712364
Olfr1156	ENSMUSG00000075144	2	87789347	87790422
Olfr1157	ENSMUSG00000075143	2	87802109	87808414
Olfr74	ENSMUSG00000075142	2	87813864	87814820
Olfr1158	ENSMUSG00000062793	2	87830270	87831211
Olfr1160	ENSMUSG00000075141	2	87845974	87846933
Olfr1161	ENSMUSG00000045150	2	87864859	87865870
Olfr73	ENSMUSG00000075140	2	87874353	87875294
Olfr1162	ENSMUSG00000075139	2	87889835	87890779
Olfr1163	ENSMUSG00000075137	2	87910522	87911564
Olfr1159-ps1	ENSMUSG00000081345	2	87838454	87839345
Gm13747	ENSMUSG00000089884	2	87874929	87877843
Olfr1164	ENSMUSG00000075136	2	87933012	87934123
Olfr1166	ENSMUSG00000075135	2	87963523	87965150
Olfr1167	ENSMUSG00000075134	2	87989141	87990240
Olfr1168	ENSMUSG00000061342	2	88025036	88025974
Olfr1170	ENSMUSG00000075133	2	88064237	88065187
Olfr1165-ps	ENSMUSG00000046590	2	87941193	87942142
Olfr1169-ps1	ENSMUSG00000084405	2	88037621	88037836
Olfr1173	ENSMUSG00000075132	2	88114266	88115204
Olfr1171-ps1	ENSMUSG00000082010	2	88093116	88093957
Gm13753	ENSMUSG00000086378	2	88093726	88098830
Olfr1172-ps1	ENSMUSG00000082237	2	88104318	88104521
Nup160	ENSMUSG00000051329	2	90517372	90576485
Fnbp4	ENSMUSG00000008200	2	90585527	90621178
Agbl2	ENSMUSG00000040812	2	90622884	90674594
Mtch2	ENSMUSG00000027282	2	90687312	90706967
C1qtnf4	ENSMUSG00000040794	2	90725943	90730683
Ndufs3	ENSMUSG00000005510	2	90734791	90744984
Kbtbd4	ENSMUSG00000005505	2	90744897	90751783
Ptpmt1	ENSMUSG00000063235	2	90750870	90758415
Celf1	ENSMUSG00000005506	2	90780539	90859654
Rapsn	ENSMUSG00000002104	2	90875777	90885886
Psmc3	ENSMUSG00000002102	2	90894166	90906526
Slc39a13	ENSMUSG00000002105	2	90901948	90910574
Sfpi1	ENSMUSG00000002111	2	90922547	90955913
Mybpc3	ENSMUSG00000002100	2	90958301	90976673
Madd	ENSMUSG00000040687	2	90977517	91023994
Nr1h3	ENSMUSG00000002108	2	91024218	91042991
Acp2	ENSMUSG00000002103	2	91043042	91054255
Ddb2	ENSMUSG00000002109	2	91051729	91077139
Pacsin3	ENSMUSG00000027257	2	91096111	91104836
Arfgap2	ENSMUSG00000027255	2	91105131	91117088
1110051M20Rik	ENSMUSG00000040591	2	91115225	91284861
Lrp4	ENSMUSG00000027253	2	91297668	91354058
Ckap5	ENSMUSG00000040549	2	91366919	91460821
F2	ENSMUSG00000027249	2	91465477	91476571
Zfp408	ENSMUSG00000075040	2	91483826	91489948
Arhgap1	ENSMUSG00000027247	2	91490017	91512483
Atg13	ENSMUSG00000027244	2	91514775	91550733
Harbi1	ENSMUSG00000027243	2	91551009	91561702
Ambra1	ENSMUSG00000040506	2	91570291	91759006
Chrm4	ENSMUSG00000040495	2	91762346	91769986
Mdk	ENSMUSG00000027239	2	91769962	91772454
Dgkz	ENSMUSG00000040479	2	91772981	91816021
Gm9821	ENSMUSG00000047923	2	91785862	91786173
Creb3l1	ENSMUSG00000027230	2	91822485	91864659
Phf21a	ENSMUSG00000058318	2	91933274	92204823
Gyltl1b	ENSMUSG00000040434	2	92205203	92215026
Pex16	ENSMUSG00000027222	2	92214833	92221374
1700029I15Rik	ENSMUSG00000044916	2	92223075	92225865
Mapk8ip1	ENSMUSG00000027223	2	92223833	92241420
Cry2	ENSMUSG00000068742	2	92243803	92274200
Slc35c1	ENSMUSG00000049922	2	92292921	92300695
Chst1	ENSMUSG00000027221	2	92439864	92455407
A330069E16Rik	ENSMUSG00000073749	2	91077303	91078509
Gm17281	ENSMUSG00000091637	2	91090900	91096152
Rpl30-ps3	ENSMUSG00000080873	2	90587728	90588161
Gm13772	ENSMUSG00000080977	2	90644417	90644733
Gm17661	ENSMUSG00000091037	2	90757800	90758071
Gm13777	ENSMUSG00000082108	2	90870935	90871279
Gm13778	ENSMUSG00000086495	2	90884249	90894090
Gm13783	ENSMUSG00000086206	2	91036063	91042935
Gm13787	ENSMUSG00000081248	2	91184179	91184346
Gm13770	ENSMUSG00000081834	2	91363737	91364041
Gm13771	ENSMUSG00000083832	2	91481842	91482079
Gm13776	ENSMUSG00000082457	2	91556316	91557576
Gm10805	ENSMUSG00000075036	2	91760685	91761085
Gm13780	ENSMUSG00000087197	2	91883530	91936199
2900072N19Rik	ENSMUSG00000087018	2	91895146	91899526
Gm13786	ENSMUSG00000083951	2	92073262	92073594
Gm13785	ENSMUSG00000081730	2	92152311	92153000
D930015M05Rik	ENSMUSG00000084781	2	92249049	92272465
Gm13814	ENSMUSG00000085261	2	92324083	92369966
Gm13817	ENSMUSG00000085293	2	92369850	92381136
Gm13815	ENSMUSG00000080860	2	92401426	92401837
Mir1955	ENSMUSG00000088639	2	92032134	92032231
U6	ENSMUSG00000088018	2	91040319	91040424
Snord67	ENSMUSG00000077221	2	91436227	91436337
Gm13816	ENSMUSG00000085976	2	92582387	92599365
Syt13	ENSMUSG00000027220	2	92755255	92796215
Prdm11	ENSMUSG00000075028	2	92805308	92886324
Gm13791	ENSMUSG00000086980	2	92696324	92753820
Gm13792	ENSMUSG00000082700	2	92713044	92713466
4631405J19Rik	ENSMUSG00000075027	2	92868113	92884889
Trp53i11	ENSMUSG00000068735	2	93027705	93041916
Tspan18	ENSMUSG00000027217	2	93041917	93174662
Tspan18	ENSMUSG00000023461	2	93151420	93174663
Cd82	ENSMUSG00000027215	2	93259268	93303297
Gm10803	ENSMUSG00000075024	2	93400725	93404518
Gm13802	ENSMUSG00000087559	2	92926099	92938401
Gm13807	ENSMUSG00000085852	2	93243704	93257987
Gm10804	ENSMUSG00000075025	2	93292976	93310028
AL683882.1	ENSMUSG00000077883	2	93023045	93023131
5S_rRNA	ENSMUSG00000089073	2	93226884	93226986
0610012H03Rik	ENSMUSG00000055312	2	105064477	105219953
Rcn1	ENSMUSG00000005973	2	105226448	105239476
Pax6	ENSMUSG00000027168	2	105509053	105543317
Elp4	ENSMUSG00000027167	2	105537477	105744721
Immp1l	ENSMUSG00000042670	2	105744795	105805715
Dnajc24	ENSMUSG00000027166	2	105806866	105843706
Dcdc5	ENSMUSG00000074981	2	106062214	106246308
Mpped2	ENSMUSG00000016386	2	106533426	106708513
2700007P21Rik	ENSMUSG00000027122	2	106802684	106814581
Fshb	ENSMUSG00000027120	2	106896297	106899813
Kcna4	ENSMUSG00000042604	2	107130796	107138659
4930527A07Rik	ENSMUSG00000086764	2	105316658	105317514
Pax6os1	ENSMUSG00000086029	2	105376237	105510487
Gm13890	ENSMUSG00000081701	2	105377250	105377639
Rpl10-ps1	ENSMUSG00000080859	2	105394358	105395002
Gm13954	ENSMUSG00000084870	2	105549156	105550255
BC048594	ENSMUSG00000086131	2	105843493	105880783
Gm13992	ENSMUSG00000083425	2	105855357	105855512
Gm13993	ENSMUSG00000083506	2	106015686	106070447
Gm14013	ENSMUSG00000081258	2	106105464	106105733
Gm14015	ENSMUSG00000087226	2	106303980	106363260
Gm14014	ENSMUSG00000087225	2	106414948	106420997
BB218582	ENSMUSG00000085218	2	106483071	106490521
Gm13901	ENSMUSG00000085530	2	106756928	106757395
Gm13902	ENSMUSG00000084164	2	106766722	106767326
Gm13900	ENSMUSG00000081966	2	106840905	106841402
Gm13904	ENSMUSG00000082066	2	106851095	106851931
Gm13903	ENSMUSG00000083181	2	106963925	106964117
BX649381.1	ENSMUSG00000093363	2	105832914	105833038
RNaseP_nuc	ENSMUSG00000089408	2	106937363	106937632
n-R5s201	ENSMUSG00000084571	2	105837189	105837304
SCARNA4	ENSMUSG00000088078	2	106649492	106649615
Gm9864	ENSMUSG00000052005	2	107435787	107440696
SNORA17	ENSMUSG00000077480	2	107726665	107726796
Gm13912	ENSMUSG00000086758	2	108023873	108131476
SNORA17	ENSMUSG00000077411	2	107920069	107920199
Gm13916	ENSMUSG00000083590	2	108286614	108287241
Gm13915	ENSMUSG00000082113	2	108412751	108413681
Gm13913	ENSMUSG00000083347	2	108418287	108418546
Gm13914	ENSMUSG00000083697	2	108573369	108574359
Rpl35a-ps4	ENSMUSG00000083424	2	108715083	108715415
Gm13910	ENSMUSG00000063684	2	108788963	108790390
Gm13923	ENSMUSG00000087544	2	108862844	108865601
Mettl15	ENSMUSG00000057234	2	108932454	109120905
BX813309.1	ENSMUSG00000076987	2	108988746	108988855
Kif18a	ENSMUSG00000027115	2	109120895	109181904
Gm13924	ENSMUSG00000084167	2	109298405	109298890
Gm13925	ENSMUSG00000081746	2	109317160	109339357
Bdnf	ENSMUSG00000048482	2	109514857	109567164
RP23-393E8.3	ENSMUSG00000093410	2	109513323	109514250
Gm13932	ENSMUSG00000083915	2	109632082	109632691
Lin7c	ENSMUSG00000027162	2	109731010	109741160
Lgr4	ENSMUSG00000050199	2	109757804	109854414
Gm13939	ENSMUSG00000063751	2	109742553	109753476
1700024P03Rik	ENSMUSG00000086186	2	109871407	109890636
Ccdc34	ENSMUSG00000027160	2	109857974	110013517
Gm13936	ENSMUSG00000085444	2	110037046	110096288
Gm13937	ENSMUSG00000082512	2	110049335	110050322
Bbox1	ENSMUSG00000041660	2	110102854	110154717
Fibin	ENSMUSG00000074971	2	110201082	110203150
U6	ENSMUSG00000064779	2	110058160	110058266
Gm13935	ENSMUSG00000083320	2	110258327	110259776
Gm10794	ENSMUSG00000074970	2	110436586	110436794
Slc5a12	ENSMUSG00000041644	2	110437455	110487936
Ano3	ENSMUSG00000074968	2	110495358	110791080
Muc15	ENSMUSG00000050808	2	110561497	110579684
Gm13961	ENSMUSG00000084094	2	111022792	111027563
Gm13962	ENSMUSG00000084933	2	111086288	111096320
Olfr1291-ps1	ENSMUSG00000084268	2	111339453	111340391
Olfr1292-ps1	ENSMUSG00000082094	2	111348730	111349668
Olfr1293-ps	ENSMUSG00000082883	2	111367461	111368399
Olfr1296-ps1	ENSMUSG00000080699	2	111433230	111434168
Olfr1300-ps1	ENSMUSG00000081035	2	111531677	111532610
Gm13922	ENSMUSG00000082091	2	111538880	111539035
Gm13930	ENSMUSG00000084134	2	111580262	111580991
Olfr268-ps1	ENSMUSG00000083059	2	111684419	111691995
Gm13928	ENSMUSG00000081069	2	111766416	111768147
Gm13929	ENSMUSG00000081037	2	111840337	111841461
Olfr1315-ps1	ENSMUSG00000082430	2	111950469	111951413
Gm13942	ENSMUSG00000079171	2	110891477	110897731
Gm13941	ENSMUSG00000079170	2	110928529	110946139
Gm15130	ENSMUSG00000079169	2	110974271	110993093
4930430A15Rik	ENSMUSG00000027157	2	111002218	111069759
Olfr1275	ENSMUSG00000074966	2	111070975	111071994
Olfr1276	ENSMUSG00000063844	2	111097274	111098242
Olfr1277	ENSMUSG00000074965	2	111109584	111110545
Olfr1278	ENSMUSG00000068647	2	111132427	111133368
Olfr1279	ENSMUSG00000068646	2	111146358	111147299
Olfr1280	ENSMUSG00000068645	2	111155595	111156597
Olfr1281	ENSMUSG00000068644	2	111168578	111169495
Olfr1282	ENSMUSG00000074964	2	111175316	111176233
Olfr1283	ENSMUSG00000064266	2	111208748	111209773
Olfr1284	ENSMUSG00000050781	2	111219124	111220187
Olfr1285	ENSMUSG00000062280	2	111248574	111249455
Olfr1286	ENSMUSG00000074963	2	111260189	111261106
Olfr1287	ENSMUSG00000063377	2	111289299	111290216
Olfr1288	ENSMUSG00000044039	2	111318943	111319881
Olfr1289	ENSMUSG00000061195	2	111323507	111324520
Olfr1290	ENSMUSG00000074962	2	111329281	111330313
Olfr1294	ENSMUSG00000074960	2	111377506	111378444
Olfr1295	ENSMUSG00000074959	2	111404626	111405668
Olfr1297	ENSMUSG00000074958	2	111461291	111462229
Olfr1298	ENSMUSG00000068641	2	111485214	111486152
Olfr1299	ENSMUSG00000074957	2	111501610	111505323
Olfr1301	ENSMUSG00000057149	2	111594408	111595346
Olfr1302	ENSMUSG00000044560	2	111620470	111621417
Olfr1303	ENSMUSG00000074956	2	111653943	111654881
Olfr1305	ENSMUSG00000074955	2	111713072	111714010
Olfr1306	ENSMUSG00000074954	2	111752147	111753085
Olfr1307	ENSMUSG00000074953	2	111784673	111785611
Olfr1308	ENSMUSG00000074952	2	111800266	111801228
Olfr1309	ENSMUSG00000074951	2	111823291	111824254
Olfr1310	ENSMUSG00000074949	2	111848359	111849367
Olfr1311	ENSMUSG00000074948	2	111861071	111862013
Olfr1312	ENSMUSG00000074947	2	111882234	111883187
Olfr1313	ENSMUSG00000074946	2	111911803	111912740
Olfr1314	ENSMUSG00000074945	2	111931918	111932856
Olfr1316	ENSMUSG00000074943	2	111970028	111970972
Olfr1317	ENSMUSG00000050776	2	111982104	111983054
Olfr1318	ENSMUSG00000049758	2	111996055	111997157
SNORA17	ENSMUSG00000077467	2	111665336	111665467
Lpcat4	ENSMUSG00000027134	2	112079625	112087268
BC125332	ENSMUSG00000041358	2	112088105	112099448
Nop10	ENSMUSG00000027133	2	112102083	112103426
Slc12a6	ENSMUSG00000027130	2	112105982	112246476
Tmem85	ENSMUSG00000027131	2	112203168	112208184
2410042D21Rik	ENSMUSG00000027132	2	112219368	112254397
2900064A13Rik	ENSMUSG00000055943	2	112295154	112312319
Chrm5	ENSMUSG00000074939	2	112319229	112320974
Aven	ENSMUSG00000003604	2	112333121	112474730
Ryr3	ENSMUSG00000057378	2	112471512	113057253
Gm13940	ENSMUSG00000081541	2	112229354	112229654
n-R5s202	ENSMUSG00000077705	2	112309410	112309523
SNORA11	ENSMUSG00000080622	2	112341026	112341154
Gm17411	ENSMUSG00000091072	2	112877202	112877271
Tmco5b	ENSMUSG00000041255	2	113125889	113137347
Fmn1	ENSMUSG00000044042	2	113167893	113556924
Grem1	ENSMUSG00000074934	2	113586321	113598803
Scg5	ENSMUSG00000023236	2	113616519	113669278
Arhgap11a	ENSMUSG00000041219	2	113670173	113688818
Gm13967	ENSMUSG00000084391	2	113224838	113225356
Gm13963	ENSMUSG00000085448	2	113227264	113281251
Gm13965	ENSMUSG00000085508	2	113240616	113250407
Gm13966	ENSMUSG00000087545	2	113280838	113282461
Gm13964	ENSMUSG00000087106	2	113340836	113344191
4930533B01Rik	ENSMUSG00000084798	2	113531210	113548707
AL929450.1	ENSMUSG00000093660	2	113128430	113128595
Slc24a3	ENSMUSG00000063873	2	144993490	145467902
Rin2	ENSMUSG00000001768	2	145610470	145713352
Naa20	ENSMUSG00000002728	2	145727835	145742161
Crnkl1	ENSMUSG00000001767	2	145743215	145760750
4930529M08Rik	ENSMUSG00000037143	2	145760520	146040775
Insm1	ENSMUSG00000068154	2	146047657	146050752
Ralgapa2	ENSMUSG00000037110	2	146065615	146337762
Gm11746	ENSMUSG00000082858	2	144756594	144757414
Gm14093	ENSMUSG00000087158	2	145163384	145205117
Gm11759	ENSMUSG00000084178	2	145335930	145336393
Gm14092	ENSMUSG00000074753	2	145376388	145380718
BC039771	ENSMUSG00000087594	2	145501103	145579408
Gm11763	ENSMUSG00000081722	2	145527150	145527461
Gm11764	ENSMUSG00000083014	2	145717818	145718440
A930019D19Rik	ENSMUSG00000085958	2	146085022	146092896
Gm14117	ENSMUSG00000042938	2	146131283	146132125
4933406D12Rik	ENSMUSG00000085796	2	146368667	146371844
Gm14111	ENSMUSG00000080870	2	146580443	146581441
Gm14114	ENSMUSG00000087618	2	146654063	146665468
7SK	ENSMUSG00000088213	2	145307143	145307467
5S_rRNA	ENSMUSG00000088711	2	145178579	145178672
U3	ENSMUSG00000087901	2	146369234	146369361
AL672100.1	ENSMUSG00000092758	2	145704022	145704209
Plk1s1	ENSMUSG00000074749	2	146681600	146795833
Xrn2	ENSMUSG00000027433	2	146838732	146903736
Nkx2-4	ENSMUSG00000054160	2	146909052	146911181
Gm14116	ENSMUSG00000082158	2	146972144	146972948
Nkx2-2	ENSMUSG00000027434	2	147003282	147019979
Nkx2-2as	ENSMUSG00000086509	2	147009819	147157417
6430503K07Rik	ENSMUSG00000053545	2	147013160	147014143
Pax1	ENSMUSG00000037034	2	147187661	147219031
Gm14115	ENSMUSG00000081971	2	147106339	147106820
Gm14113	ENSMUSG00000084371	2	147115491	147116466
Gm14110	ENSMUSG00000084774	2	147149298	147150823
AI646519	ENSMUSG00000087521	2	147187277	147188145
Gm14109	ENSMUSG00000083126	2	147228690	147228998
7SK	ENSMUSG00000089316	2	147076198	147076521
Gm14107	ENSMUSG00000080844	2	147468584	147468913
Gm14106	ENSMUSG00000081741	2	147493751	147494188
A530006G24Rik	ENSMUSG00000051986	2	147536429	147543368
9030622O22Rik	ENSMUSG00000086141	2	147770476	147865939
U6	ENSMUSG00000065791	2	147700508	147700614
Foxa2	ENSMUSG00000037025	2	147868613	147872705
Sstr4	ENSMUSG00000037014	2	148221113	148226239
Thbd	ENSMUSG00000074743	2	148230207	148233924
Cd93	ENSMUSG00000027435	2	148262376	148269299
Nxt1	ENSMUSG00000036992	2	148498337	148501763
Gzf1	ENSMUSG00000027439	2	148506759	148518685
Napb	ENSMUSG00000027438	2	148519721	148558203
Cstl1	ENSMUSG00000055177	2	148576094	148581866
Cst11	ENSMUSG00000036958	2	148594345	148597233
8030411F24Rik	ENSMUSG00000027444	2	148607745	148611673
Cst12	ENSMUSG00000027443	2	148615097	148619282
Cst8	ENSMUSG00000027442	2	148624521	148631331
Gm14108	ENSMUSG00000083750	2	147897082	147897575
Gm14119	ENSMUSG00000082911	2	148244768	148245002
Gm14120	ENSMUSG00000087678	2	148294626	148304516
snoU85	ENSMUSG00000089458	2	147976886	147977198
SNORA17	ENSMUSG00000088870	2	148450447	148450558
Cst13	ENSMUSG00000036924	2	148645817	148656146
Cst9	ENSMUSG00000027445	2	148660883	148664474
[truncated: 9,803 more rows]

## Sheet: wk14IgG2b-FHA
Gene Name	Ensembl Gene ID	Chromosome	Start	End
Tsga10	ENSMUSG00000060771	1	37811417	37922143
Lipt1	ENSMUSG00000037216	1	37928583	37934232
Mitd1	ENSMUSG00000026088	1	37931646	37947256
Mrpl30	ENSMUSG00000026087	1	37947322	37955380
Lyg2	ENSMUSG00000061584	1	37962766	37973338
Lyg1	ENSMUSG00000026085	1	38003581	38014604
Txndc9	ENSMUSG00000058407	1	38040712	38054191
Eif5b	ENSMUSG00000026083	1	38054855	38112424
Rev1	ENSMUSG00000026082	1	38109632	38186507
Aff3	ENSMUSG00000037138	1	38234171	38721800
Lonrf2	ENSMUSG00000048814	1	38850514	38892935
Chst10	ENSMUSG00000026080	1	38920722	38955005
Nms	ENSMUSG00000067604	1	38995994	39007123
Pdcl3	ENSMUSG00000026078	1	39044659	39054081
Npas2	ENSMUSG00000026077	1	39250576	39420079
Rpl31	ENSMUSG00000073702	1	39424696	39428753
Tbc1d8	ENSMUSG00000003134	1	39428344	39535592
D1Bwg0212e	ENSMUSG00000003135	1	39591837	39603726
Rnf149	ENSMUSG00000048234	1	39608141	39634250
Creg2	ENSMUSG00000050967	1	39675251	39708027
Rfx8	ENSMUSG00000057173	1	39722151	39777842
Gm15457	ENSMUSG00000087374	1	37990441	38010981
Gm16150	ENSMUSG00000085391	1	38292265	38303511
Gm16151	ENSMUSG00000085280	1	38364747	38368775
Gm16152	ENSMUSG00000087131	1	38441794	38450819
Gm20428	ENSMUSG00000092553	1	39333128	39333410
Gm3617	ENSMUSG00000092563	1	39371744	39372298
Gm15832	ENSMUSG00000085894	1	39604415	39608847
Gm17715	ENSMUSG00000092106	1	37922144	37928233
D930019O06Rik	ENSMUSG00000090677	1	39707021	39714235
SNORA33	ENSMUSG00000064936	1	39630591	39630720
7SK	ENSMUSG00000089141	1	38030812	38031048
Snord89	ENSMUSG00000077704	1	39605590	39605699
U3	ENSMUSG00000065629	1	39576378	39576591
Gm3646	ENSMUSG00000091937	1	39861028	39861189
Map4k4	ENSMUSG00000026074	1	39957758	40083155
Il1r2	ENSMUSG00000026073	1	40141613	40182064
Gm16894	ENSMUSG00000086705	1	40133073	40142698
Il1r1	ENSMUSG00000026072	1	40281925	40373043
Il1rl2	ENSMUSG00000070942	1	40381472	40422316
Il1rl1	ENSMUSG00000026069	1	40486415	40522260
Il18r1	ENSMUSG00000026070	1	40522397	40557699
Il18rap	ENSMUSG00000026068	1	40572207	40608550
Slc9a4	ENSMUSG00000026065	1	40637072	40687576
Slc9a2	ENSMUSG00000026062	1	40738557	40825730
Mfsd9	ENSMUSG00000041945	1	40828883	40847532
Tmem182	ENSMUSG00000079588	1	40862446	40912789
snoU13	ENSMUSG00000088965	1	40666590	40666680
Gm9915	ENSMUSG00000053640	1	42286571	42287953
2610017I09Rik	ENSMUSG00000060424	1	42705007	42724517
Pou3f3	ENSMUSG00000045515	1	42753991	42757052
RP23-71K9.1	ENSMUSG00000093778	1	42749785	42751670
RP23-114H2.1	ENSMUSG00000093436	1	42751770	42797813
Mrps9	ENSMUSG00000060679	1	42908078	42962527
SNORA17	ENSMUSG00000077448	1	42923530	42923663
Ndufb3	ENSMUSG00000026032	1	58643228	58652808
Orc2	ENSMUSG00000026037	1	58519615	58561953
Fam126b	ENSMUSG00000038174	1	58579650	58643167
Carf	ENSMUSG00000026017	1	60155091	60207876
Gm15759	ENSMUSG00000089822	1	58310961	58372500
Gm15834	ENSMUSG00000085054	1	58561992	58580074
Gm15464	ENSMUSG00000082609	1	60174099	60174529
Cdk15	ENSMUSG00000026023	1	59313750	59409837
Fzd7	ENSMUSG00000041075	1	59538991	59543791
Gm973	ENSMUSG00000047361	1	59573108	59691352
Sumo1	ENSMUSG00000026021	1	59696278	59727678
Nop58	ENSMUSG00000026020	1	59741853	59768968
Bmpr2	ENSMUSG00000067336	1	59821481	59927703
Fam117b	ENSMUSG00000041040	1	59969850	60042190
Ica1l	ENSMUSG00000026018	1	60045914	60099931
Wdr12	ENSMUSG00000026019	1	60133712	60155489
Aox3	ENSMUSG00000064294	1	58169974	58257542
Als2	ENSMUSG00000026024	1	59219770	59294075
Gm10068	ENSMUSG00000059647	1	58703452	58705161
Als2cr12	ENSMUSG00000047528	1	58714961	58752833
Cflar	ENSMUSG00000026031	1	58768352	58815728
Casp8	ENSMUSG00000026029	1	58852218	58904347
Trak2	ENSMUSG00000026028	1	58957293	59030274
Stradb	ENSMUSG00000026027	1	59030366	59052559
Als2cr11	ENSMUSG00000047383	1	59053967	59060287
Gm17570	ENSMUSG00000090590	1	59060795	59062069
Als2cr11	ENSMUSG00000072295	1	59107350	59151744
Als2cr4	ENSMUSG00000038079	1	59157438	59177203
Mpp4	ENSMUSG00000079550	1	59177780	59220233
Ppil3	ENSMUSG00000026035	1	58487838	58502330
Aox4	ENSMUSG00000038242	1	58267241	58325441
Nif3l1	ENSMUSG00000026036	1	58501995	58538660
Gm17453	ENSMUSG00000092149	1	59545324	59549449
Aox3l1	ENSMUSG00000079554	1	58335170	58436108
Bzw1	ENSMUSG00000051223	1	58449980	58463392
Clk1	ENSMUSG00000026034	1	58467033	58480910
Snord70	ENSMUSG00000077345	1	59748778	59748864
Snord11	ENSMUSG00000089093	1	59761633	59761718
SNORD11	ENSMUSG00000089512	1	59761105	59761179
U6	ENSMUSG00000064701	1	58523359	58523465
SNORA17	ENSMUSG00000089275	1	58211825	58211932
SNORA17	ENSMUSG00000077616	1	59127832	59127962
7SK	ENSMUSG00000089276	1	59683424	59683508
SNORD70	ENSMUSG00000077358	1	59749353	59749436
Ndufs1	ENSMUSG00000025968	1	63190170	63223396
Fastkd2	ENSMUSG00000025962	1	63777188	63801229
4933402D24Rik	ENSMUSG00000025961	1	63801481	63815841
Klf7	ENSMUSG00000025959	1	64076021	64168856
Creb1	ENSMUSG00000025958	1	64579378	64651121
Mettl21a	ENSMUSG00000025956	1	64653047	64663816
Ccnyl1	ENSMUSG00000070871	1	64737029	64772218
Fzd5	ENSMUSG00000045005	1	64777134	64784324
Plekhm3	ENSMUSG00000051344	1	64832557	65003398
Akr1cl	ENSMUSG00000025955	1	65059263	65079333
Gm11601	ENSMUSG00000081617	1	63084788	63085155
Gm11603	ENSMUSG00000081429	1	63120348	63120593
Gm11602	ENSMUSG00000084799	1	63161045	63204864
Gm11607	ENSMUSG00000086730	1	63246887	63254188
Gm11608	ENSMUSG00000087561	1	63313422	63319694
Gm11606	ENSMUSG00000083039	1	63404008	63404624
Gm11605	ENSMUSG00000081643	1	63411294	63411939
Gm12748	ENSMUSG00000083066	1	63718042	63718545
Gm13751	ENSMUSG00000080817	1	63891401	63892152
Gm13754	ENSMUSG00000082373	1	63964422	63982506
Gm13749	ENSMUSG00000044689	1	64011301	64015573
Gm13748	ENSMUSG00000086836	1	64125228	64137356
Gm13750	ENSMUSG00000086721	1	64196775	64197239
2810408I11Rik	ENSMUSG00000087213	1	64726445	64737233
Rpl10a-ps1	ENSMUSG00000084416	1	65040498	65041205
Gm8550	ENSMUSG00000090042	1	65074654	65075306
Ino80d	ENSMUSG00000040865	1	63004992	63161241
Eef1b2	ENSMUSG00000025967	1	63223399	63227060
Gpr1	ENSMUSG00000046856	1	63229265	63261117
Zdbf2	ENSMUSG00000027520	1	63319839	63361150
Adam23	ENSMUSG00000025964	1	63492465	63643089
Dytn	ENSMUSG00000069085	1	63669425	63733501
Mdh1b	ENSMUSG00000025963	1	63745393	63776892
Gm17427	ENSMUSG00000090886	1	64076037	64079501
AC167197.1	ENSMUSG00000093228	1	64442908	64442977
U6	ENSMUSG00000065946	1	63346854	63346957
SNORD51	ENSMUSG00000064612	1	63225254	63225326
AL669947.1	ENSMUSG00000092705	1	63319800	63319937
Snora41	ENSMUSG00000064602	1	63225578	63225709
AL645950.1	ENSMUSG00000092874	1	63244605	63244730
U1	ENSMUSG00000077471	1	65047881	65048036
U6	ENSMUSG00000087823	1	63622062	63622164
Cryge	ENSMUSG00000070870	1	65095128	65097723
Pikfyve	ENSMUSG00000025949	1	65233324	65320586
Pth2r	ENSMUSG00000025946	1	65328630	65435818
Crygf	ENSMUSG00000025945	1	65973096	65974881
Idh1	ENSMUSG00000025950	1	65205190	65233053
Crygd	ENSMUSG00000067299	1	65108446	65110026
Crygc	ENSMUSG00000025952	1	65118099	65120263
Crygb	ENSMUSG00000073658	1	65126804	65128862
Cryga	ENSMUSG00000044429	1	65146963	65149947
D630023F18Rik	ENSMUSG00000044816	1	65147193	65169788
Gm5255	ENSMUSG00000082565	1	65597038	65597811
Gm8805	ENSMUSG00000082774	1	65599256	65599568
Gm8809	ENSMUSG00000081623	1	66078757	66079499
Gm15659	ENSMUSG00000083242	1	66079659	66079999
Gm8812	ENSMUSG00000083289	1	66109539	66109950
Mtap2	ENSMUSG00000015222	1	66221847	66489157
Unc80	ENSMUSG00000055567	1	66514941	66746440
Rpe	ENSMUSG00000026005	1	66747405	66766379
1110028C15Rik	ENSMUSG00000026004	1	66765817	66864169
Acadl	ENSMUSG00000026003	1	66877413	66909851
Myl1	ENSMUSG00000061816	1	66970869	66991978
Lancl1	ENSMUSG00000026000	1	67047091	67085446
Cps1	ENSMUSG00000025991	1	67169600	67277833
Gm10558	ENSMUSG00000073656	1	66368850	66375370
Gm15789	ENSMUSG00000082057	1	66830487	66833019
Gm15793	ENSMUSG00000082769	1	66895632	66896266
Gm10072	ENSMUSG00000059999	1	66995104	66995529
Gm15826	ENSMUSG00000082212	1	66998403	67000043
Gm15668	ENSMUSG00000086204	1	67295774	67370183
U7	ENSMUSG00000089518	1	66903153	66903209
SNORA17	ENSMUSG00000077328	1	66913371	66913500
SNORA17	ENSMUSG00000077745	1	67303798	67303926
U1	ENSMUSG00000065694	1	66482656	66482806
SNORA26	ENSMUSG00000088850	1	66352463	66352599
Kif22-ps	ENSMUSG00000082473	1	67631627	67633610
AC101752.1	ENSMUSG00000093566	1	67663549	67663626
Gm15669	ENSMUSG00000085075	1	67839055	67851898
Erbb4	ENSMUSG00000062209	1	68078760	69154633
Gm15671	ENSMUSG00000087329	1	68051660	68072470
AC101833.1	ENSMUSG00000093213	1	68020250	68020351
Spag16	ENSMUSG00000053153	1	69873562	70771706
Vwc2l	ENSMUSG00000045648	1	70772289	70931971
Bard1	ENSMUSG00000026196	1	71074072	71149720
Abca12	ENSMUSG00000050296	1	71289664	71461484
Atic	ENSMUSG00000026192	1	71603724	71626205
Fn1	ENSMUSG00000026193	1	71632094	71699774
Apol7d	ENSMUSG00000073652	1	71699411	71709417
Gm5528	ENSMUSG00000060125	1	72050862	72051344
Mreg	ENSMUSG00000039395	1	72205807	72258881
Pecr	ENSMUSG00000026189	1	72305741	72330888
Tmem169	ENSMUSG00000026188	1	72330943	72349678
Xrcc5	ENSMUSG00000026187	1	72353995	72441526
March4	ENSMUSG00000039372	1	72473686	72583504
Smarcal1	ENSMUSG00000039354	1	72629825	72679708
Gm16236	ENSMUSG00000089965	1	71086226	71086604
Gm5829	ENSMUSG00000067744	1	71756276	71756629
Gm15843	ENSMUSG00000085812	1	72506073	72506601
D230017M19Rik	ENSMUSG00000085769	1	72283039	72321443
AC120136.3	ENSMUSG00000093333	1	72301582	72301772
AC120136.2	ENSMUSG00000093247	1	72283520	72283710
AC120136.1	ENSMUSG00000093111	1	72290787	72290977
U2	ENSMUSG00000075752	1	72272814	72273004
Ankar	ENSMUSG00000039342	1	72689554	72747138
Rpl37a	ENSMUSG00000046330	1	72757834	72760383
Igfbp2	ENSMUSG00000039323	1	72871077	72899048
Igfbp5	ENSMUSG00000026185	1	72904506	72921458
Tnp1	ENSMUSG00000026182	1	73061657	73062473
Tns1	ENSMUSG00000055322	1	73956805	74171021
Rufy4	ENSMUSG00000061815	1	74172115	74194797
Cxcr2	ENSMUSG00000026180	1	74200563	74207812
Cxcr1	ENSMUSG00000048480	1	74238359	74241205
Mir1928	ENSMUSG00000087820	1	74253128	74253194
U6	ENSMUSG00000075767	1	74259387	74259493
5S_rRNA	ENSMUSG00000088666	1	73810284	73810409
Arpc2	ENSMUSG00000006304	1	74283071	74314783
Gpbar1	ENSMUSG00000064272	1	74325124	74326198
Aamp	ENSMUSG00000006299	1	74326421	74331254
Pnkd	ENSMUSG00000026179	1	74331504	74400268
Tmbim1	ENSMUSG00000006301	1	74334821	74352196
Gm216	ENSMUSG00000073650	1	74408682	74415895
Slc11a1	ENSMUSG00000026177	1	74421777	74432636
Ctdsp1	ENSMUSG00000026176	1	74438083	74443859
Vil1	ENSMUSG00000026175	1	74455950	74482133
Usp37	ENSMUSG00000033364	1	74482084	74590860
Rqcd1	ENSMUSG00000026174	1	74552632	74577418
Plcd4	ENSMUSG00000026173	1	74589462	74614368
Zfp142	ENSMUSG00000026135	1	74611701	74634820
Bcs1l	ENSMUSG00000026172	1	74634863	74639017
Rnf25	ENSMUSG00000026171	1	74640322	74647971
Stk36	ENSMUSG00000033276	1	74648019	74683468
Ttll4	ENSMUSG00000033257	1	74708319	74748406
Cyp27a1	ENSMUSG00000026170	1	74760148	74784464
Prkag3	ENSMUSG00000006542	1	74786073	74795795
Wnt6	ENSMUSG00000033227	1	74818466	74831893
Wnt10a	ENSMUSG00000026167	1	74838090	74850753
Cdk5r2	ENSMUSG00000090071	1	74901508	74904005
Fev	ENSMUSG00000055197	1	74928083	74931993
Cryba2	ENSMUSG00000006546	1	74936508	74939717
Ccdc108	ENSMUSG00000047021	1	74948645	74982173
Ihh	ENSMUSG00000006538	1	74991891	74998246
Nhej1	ENSMUSG00000026162	1	75013713	75093213
Slc23a3	ENSMUSG00000026205	1	75122117	75130464
1810031K17Rik	ENSMUSG00000033159	1	75131128	75139271
Fam134a	ENSMUSG00000049339	1	75139360	75144483
Zfand2b	ENSMUSG00000026197	1	75165220	75168203
Abcb6	ENSMUSG00000026198	1	75168291	75176966
Atg9a	ENSMUSG00000033124	1	75177440	75188497
Glb1l	ENSMUSG00000026200	1	75194818	75207353
Stk16	ENSMUSG00000026201	1	75207413	75212181
Tuba4a	ENSMUSG00000026202	1	75211549	75215828
Dnajb2	ENSMUSG00000026203	1	75233040	75241379
Ptprn	ENSMUSG00000026204	1	75243616	75260783
Resp18	ENSMUSG00000033061	1	75268774	75274990
Dnpep	ENSMUSG00000026209	1	75304471	75314212
Des	ENSMUSG00000026208	1	75356904	75365154
Speg	ENSMUSG00000026207	1	75371872	75428895
Gmppa	ENSMUSG00000033021	1	75432505	75439754
Accn4	ENSMUSG00000033007	1	75447011	75470918
Chpf	ENSMUSG00000032997	1	75471144	75476046
Gm16582	ENSMUSG00000089964	1	74897469	74926527
Gm15841	ENSMUSG00000089653	1	74948945	74954227
Ankzf1	ENSMUSG00000026199	1	75188709	75195962
Gm15179	ENSMUSG00000085653	1	75364787	75371587
Gm15178	ENSMUSG00000086053	1	75388706	75392938
Mir26b	ENSMUSG00000065468	1	74440884	74440968
AC117610.1	ENSMUSG00000093155	1	74633470	74633546
Mir375	ENSMUSG00000065616	1	74947226	74947300
Obsl1	ENSMUSG00000026211	1	75475885	75503027
Tmem198	ENSMUSG00000051703	1	75476107	75482280
Inha	ENSMUSG00000032968	1	75503652	75506941
Stk11ip	ENSMUSG00000026213	1	75518104	75533910
Slc4a3	ENSMUSG00000006576	1	75542841	75558747
Gm15181	ENSMUSG00000082745	1	75510682	75510858
Gm15183	ENSMUSG00000082059	1	75538786	75539133
Gm15180	ENSMUSG00000083244	1	75564658	75565149
Gm15182	ENSMUSG00000082528	1	75621229	75622904
Slamf1	ENSMUSG00000015316	1	173697258	173731315
Cd84	ENSMUSG00000038147	1	173769828	173820849
Gm10521	ENSMUSG00000073492	1	173825795	173828368
Slamf6	ENSMUSG00000015314	1	173847646	173879083
Vangl2	ENSMUSG00000026556	1	173931091	173958575
Nhlh1	ENSMUSG00000051251	1	173982423	173987704
Ncstn	ENSMUSG00000003458	1	173996144	174012926
Copa	ENSMUSG00000026553	1	174012660	174052461
Pex19	ENSMUSG00000003464	1	174056886	174066624
Dcaf8	ENSMUSG00000026554	1	174078146	174126524
Pea15a	ENSMUSG00000013698	1	174126859	174136935
Casq1	ENSMUSG00000007122	1	174140025	174150026
Atp1a4	ENSMUSG00000007107	1	174153644	174188545
Igsf8	ENSMUSG00000038034	1	174191772	174249972
Atp1a2	ENSMUSG00000007097	1	174201840	174228195
Kcnj9	ENSMUSG00000038026	1	174251164	174259394
Kcnj10	ENSMUSG00000044708	1	174271341	174304216
Pigm	ENSMUSG00000050229	1	174306662	174314230
Slamf9	ENSMUSG00000026548	1	174405489	174408706
Igsf9	ENSMUSG00000037995	1	174411919	174429009
Tagln2	ENSMUSG00000026547	1	174430178	174437511
Ccdc19	ENSMUSG00000026546	1	174451175	174476001
Vsig8	ENSMUSG00000049598	1	174486069	174493848
Slamf8	ENSMUSG00000053318	1	174511508	174520699
Fcrl6	ENSMUSG00000070504	1	174526771	174532682
Dusp23	ENSMUSG00000026544	1	174560900	174563105
Crp	ENSMUSG00000037942	1	174628187	174630097
Apcs	ENSMUSG00000026542	1	174824093	174825185
Olfr16	ENSMUSG00000037924	1	174886899	174887948
Olfr1408	ENSMUSG00000062527	1	175060331	175061367
Olfr1406	ENSMUSG00000058981	1	175113573	175114635
Olfr218	ENSMUSG00000046643	1	175133489	175134430
Olfr1404	ENSMUSG00000049456	1	175145738	175146771
Fcer1a	ENSMUSG00000005339	1	175151402	175157360
Olfr418-ps1	ENSMUSG00000049605	1	175200278	175201268
Gm11062	ENSMUSG00000079180	1	175204592	175207853
Darc	ENSMUSG00000037872	1	175262017	175263634
Cadm3	ENSMUSG00000005338	1	175264385	175297826
Aim2	ENSMUSG00000037860	1	175281010	175396171
Gm4955	ENSMUSG00000037849	1	175398640	175421172
BC094916	ENSMUSG00000070501	1	175449848	175466088
Pydc4	ENSMUSG00000073491	1	175497204	175529405
Pyhin1	ENSMUSG00000043263	1	175560990	175578059
Pydc3	ENSMUSG00000066677	1	175604042	175628523
AI607873	ENSMUSG00000073490	1	175653814	175671878
Gm10171	ENSMUSG00000089803	1	174074403	174075032
Gm17224	ENSMUSG00000092085	1	174143152	174143811
4933439K11Rik	ENSMUSG00000085184	1	174468264	174488260
Olfr1407-ps1	ENSMUSG00000066680	1	175080262	175080503
7SK	ENSMUSG00000088813	1	174614646	174614972
SNORA17	ENSMUSG00000077252	1	174866343	174866465
U6	ENSMUSG00000070182	1	174773665	174773769
Ifi204	ENSMUSG00000073489	1	175677424	175697050
Cdc42bpa	ENSMUSG00000026490	1	181890603	182095734
Adck3	ENSMUSG00000026489	1	182095369	182129733
Psen2	ENSMUSG00000010609	1	182157135	182193569
Gm5069	ENSMUSG00000055676	1	182257102	182260681
Itpkb	ENSMUSG00000038855	1	182260607	182354933
6330403A02Rik	ENSMUSG00000053963	1	182362518	182413598
Parp1	ENSMUSG00000026496	1	182499086	182531384
Lin9	ENSMUSG00000058729	1	182571498	182620816
Mixl1	ENSMUSG00000026497	1	182623174	182627165
Acbd3	ENSMUSG00000026499	1	182656174	182684334
H3f3a	ENSMUSG00000060743	1	182730963	182744074
BC031781	ENSMUSG00000038806	1	182781282	182798228
Lefty2	ENSMUSG00000066652	1	182823239	182829234
Pycr2	ENSMUSG00000026520	1	182834405	182838218
Lefty1	ENSMUSG00000038793	1	182865153	182868531
Tmem63a	ENSMUSG00000026519	1	182872475	182905243
Ephx1	ENSMUSG00000038776	1	182906286	182951035
9130409I23Rik	ENSMUSG00000038768	1	182981368	182990798
Nvl	ENSMUSG00000026516	1	183023554	183074288
Cnih4	ENSMUSG00000062169	1	183081062	183099125
Wdr26	ENSMUSG00000038733	1	183103359	183142109
A430110L20Rik	ENSMUSG00000054135	1	183156207	183158621
Cnih3	ENSMUSG00000026514	1	183282759	183390772
Ccdc121	ENSMUSG00000050625	1	183439764	183441582
Dnahc14	ENSMUSG00000047369	1	183669119	183699805
Lbr	ENSMUSG00000004880	1	183745447	183772532
Gm5533	ENSMUSG00000056699	1	183781739	183783320
Enah	ENSMUSG00000022995	1	183834576	183950111
Gm17275	ENSMUSG00000090986	1	182732699	182739614
2210411M09Rik	ENSMUSG00000085563	1	182882195	182888280
Rpl35a-ps2	ENSMUSG00000081214	1	183172076	183172498
Gm16067	ENSMUSG00000073485	1	182743907	182746990
Gm16547	ENSMUSG00000089888	1	183330595	183330887
Gm16539	ENSMUSG00000089927	1	183361854	183362531
U6	ENSMUSG00000064970	1	183743738	183743831
U6	ENSMUSG00000084558	1	182762900	182763007
AC167020.1	ENSMUSG00000092967	1	182663926	182664013
5S_rRNA	ENSMUSG00000089429	1	183770584	183770699
Srp9	ENSMUSG00000026511	1	184054868	184062538
Vmn1r1	ENSMUSG00000091013	1	184087275	184088450
4922505E12Rik	ENSMUSG00000043429	1	184677388	184679253
Susd4	ENSMUSG00000038576	1	184693991	184826729
Tlr5	ENSMUSG00000079164	1	184884919	184906175
Gm8214	ENSMUSG00000090533	1	185505657	185506073
Dusp10	ENSMUSG00000039384	1	185837181	185899515
1700056E22Rik	ENSMUSG00000044854	1	185856911	185857453
Hlx	ENSMUSG00000039377	1	186551019	186556498
Mosc1	ENSMUSG00000026621	1	186610655	186635192
Rpl21-ps1	ENSMUSG00000059483	1	186441127	186441609
4930488B22Rik	ENSMUSG00000092578	1	186536376	186542868
U6	ENSMUSG00000089057	1	186403988	186404085
Ush2a	ENSMUSG00000026609	1	190085902	190788920
Kctd3	ENSMUSG00000026608	1	190794977	190831719
Kcnk2	ENSMUSG00000037624	1	191031816	191167711
Cenpf	ENSMUSG00000026605	1	191464478	191511965
Ptpn14	ENSMUSG00000026604	1	191552147	191700574
Smyd2	ENSMUSG00000026603	1	191704371	191746242
Prox1	ENSMUSG00000010175	1	191941917	191994559
Gm17653	ENSMUSG00000090445	1	191657020	191660499
Gm17566	ENSMUSG00000079045	1	191994175	192041155
AC121892.1	ENSMUSG00000077884	1	190343232	190343322
SNORA17	ENSMUSG00000077235	1	190446802	190446932
mmu-mir-1194	ENSMUSG00000080505	1	191217229	191217349
U6	ENSMUSG00000084550	1	190584355	190584458
AC124613.1	ENSMUSG00000093064	1	192306751	192307036
Rps6kc1	ENSMUSG00000089872	1	192524081	192735649
Angel2	ENSMUSG00000026634	1	192748991	192770841
Vash2	ENSMUSG00000037568	1	192771527	192803175
Mfsd7b	ENSMUSG00000066595	1	192829711	192850069
1700022P22Rik	ENSMUSG00000057072	1	192860701	192866821
Tatdn3	ENSMUSG00000026632	1	192869705	192886811
Nsl1	ENSMUSG00000062510	1	192886891	192908437
Batf3	ENSMUSG00000026630	1	192922293	192932822
Fam71a	ENSMUSG00000091017	1	192986463	192988696
Atf3	ENSMUSG00000026628	1	192994175	193007219
Nenf	ENSMUSG00000037499	1	193130668	193142073
Tmem206	ENSMUSG00000026627	1	193149791	193174793
Ppp2r5a	ENSMUSG00000026626	1	193175860	193220920
D730003I15Rik	ENSMUSG00000073478	1	193048353	193049565
7SK	ENSMUSG00000088461	1	193020785	193020892
Dtl	ENSMUSG00000037474	1	193361244	193399413
Ints7	ENSMUSG00000037461	1	193399642	193446551
Lpgat1	ENSMUSG00000026623	1	193541713	193608134
Nek2	ENSMUSG00000026622	1	193645323	193656929
1700034H15Rik	ENSMUSG00000055833	1	193714112	193731406
Slc30a1	ENSMUSG00000037434	1	193730646	193737126
Rd3	ENSMUSG00000049353	1	193801270	193810273
Traf5	ENSMUSG00000026637	1	193821311	193916440
Rcor3	ENSMUSG00000037395	1	193922652	193961892
Kcnh1	ENSMUSG00000058248	1	194014666	194334041
Hhat	ENSMUSG00000037375	1	194336710	194597413
Gm16621	ENSMUSG00000085764	1	193916253	193923511
Gm10516	ENSMUSG00000073476	1	193960780	193974895
U5	ENSMUSG00000064881	1	194571765	194571880
U6	ENSMUSG00000064845	1	193596600	193596713
U6	ENSMUSG00000065821	1	193586079	193586182
Mir3473c	ENSMUSG00000093003	1	193822435	193822515
A730013G03Rik	ENSMUSG00000047384	1	194659363	194660913
Sertad4	ENSMUSG00000016262	1	194670625	194681946
Gm15867	ENSMUSG00000089812	1	194681122	194682660
Syt14	ENSMUSG00000016200	1	194723404	194861911
Diexf	ENSMUSG00000016181	1	194930597	194956445
Irf6	ENSMUSG00000026638	1	194979306	194998236
A130010J15Rik	ENSMUSG00000079144	1	194994243	195002497
Traf3ip3	ENSMUSG00000037318	1	195001700	195027897
Gm15872	ENSMUSG00000090080	1	195013569	195018205
4930570N18Rik	ENSMUSG00000089683	1	195029233	195052402
1600010F14Rik	ENSMUSG00000089688	1	195033944	195080668
7SK	ENSMUSG00000089158	1	194824480	194824768
Hsd11b1	ENSMUSG00000016194	1	195047824	195090248
Gata3	ENSMUSG00000015619	2	9778705	9811661
4930412O13Rik	ENSMUSG00000025783	2	9802879	9805548
9230102O04Rik	ENSMUSG00000079602	2	9804668	9811167
Taf3	ENSMUSG00000025782	2	9836179	9970223
Atp5c1	ENSMUSG00000025781	2	9977643	10002137
Kin	ENSMUSG00000037262	2	10002220	10014433
Itih2	ENSMUSG00000037254	2	10016218	10053023
Itih5	ENSMUSG00000025780	2	10075198	10178156
Sfmbt2	ENSMUSG00000061186	2	10292137	10516880
Gm10852	ENSMUSG00000075532	2	10636794	10639296
Gm13217	ENSMUSG00000082953	2	8962744	8964111
1700061F12Rik	ENSMUSG00000085580	2	9111142	9119104
Gm13221	ENSMUSG00000083423	2	9191707	9192136
Gm13219	ENSMUSG00000079604	2	9274058	9369303
Gm13220	ENSMUSG00000081202	2	9497463	9497970
Gm13218	ENSMUSG00000079603	2	9512846	9519470
Gm13256	ENSMUSG00000086618	2	9798883	9800496
Gm13262	ENSMUSG00000075534	2	9827805	9836305
Gm13261	ENSMUSG00000086748	2	10260910	10295668
Mir467b	ENSMUSG00000076044	2	10402875	10402947
AL772216.42	ENSMUSG00000092961	2	10432088	10432190
AL772216.29	ENSMUSG00000080612	2	10414048	10414173
AL772216.34	ENSMUSG00000080649	2	10420831	10420953
Mir669c	ENSMUSG00000076118	2	10430923	10431031
mmu-mir-297a-5	ENSMUSG00000076983	2	10393881	10393970
Mir669d	ENSMUSG00000077834	2	10389970	10390090
AL772216.23	ENSMUSG00000080558	2	10430080	10430206
Mir466d	ENSMUSG00000078031	2	10433594	10433689
AL772216.10	ENSMUSG00000080422	2	10418418	10418541
AL772216.8	ENSMUSG00000080405	2	10404439	10404558
Mir669a-5	ENSMUSG00000076025	2	10403384	10403480
Mir669m-1	ENSMUSG00000089570	2	10434417	10434514
Mir467e	ENSMUSG00000076948	2	10427348	10427434
AL772216.38	ENSMUSG00000080686	2	10438964	10439053
AL772216.37	ENSMUSG00000080685	2	10406877	10406996
Mir467a-2	ENSMUSG00000076161	2	10400425	10400507
AL772216.6	ENSMUSG00000080382	2	10415948	10416070
AL772216.24	ENSMUSG00000080567	2	10406678	10406803
Mir297a-3	ENSMUSG00000076956	2	10437447	10437548
Mir466b-2	ENSMUSG00000076966	2	10420312	10420393
Mir297c	ENSMUSG00000076976	2	10430643	10430740
AL772216.19	ENSMUSG00000080521	2	10409331	10409451
Mir466c-2	ENSMUSG00000077140	2	10405593	10405682
Mir669a-9	ENSMUSG00000076021	2	10415651	10415747
AL772216.12	ENSMUSG00000080444	2	10401992	10402112
AL772216.31	ENSMUSG00000080627	2	10387387	10387494
Mir467a-3	ENSMUSG00000077054	2	10405305	10405387
Mir669a-10	ENSMUSG00000076020	2	10420534	10420630
Mir669a-8	ENSMUSG00000076022	2	10413189	10413285
Mir297b	ENSMUSG00000076222	2	10433294	10433402
Mir467a-10	ENSMUSG00000077033	2	10424900	10424982
Mir669a-7	ENSMUSG00000076023	2	10408276	10408372
Mir466g	ENSMUSG00000078025	2	10436222	10436301
Mir466p	ENSMUSG00000077113	2	10427633	10427721
Mir466b-5	ENSMUSG00000076992	2	10410514	10410601
Mir466b-8	ENSMUSG00000077098	2	10398255	10398340
Mir466f-3	ENSMUSG00000077981	2	10393580	10393673
Mir466m	ENSMUSG00000092793	2	10388290	10388373
Mir467a-9	ENSMUSG00000076156	2	10420020	10420102
AL772216.30	ENSMUSG00000080624	2	10428382	10428482
mmu-mir-466b-1	ENSMUSG00000077028	2	10422736	10422825
Mir669h	ENSMUSG00000080594	2	10439782	10439906
Mir467a-6	ENSMUSG00000076986	2	10412675	10412757
Mir466f-2	ENSMUSG00000077998	2	10390302	10390395
Mir467a-7	ENSMUSG00000076158	2	10415137	10415219
AL772216.27	ENSMUSG00000080599	2	10418979	10419104
AL772216.1	ENSMUSG00000077095	2	10431211	10431314
Mir669i	ENSMUSG00000080657	2	10439231	10439357
Mir669a-4	ENSMUSG00000076026	2	10400938	10401034
Mir669b	ENSMUSG00000076126	2	10389417	10389513
AL772216.33	ENSMUSG00000080641	2	10424018	10424138
AL772216.17	ENSMUSG00000080493	2	10413487	10413610
Mir669p-1	ENSMUSG00000077072	2	10410743	10410829
Mir466l	ENSMUSG00000078060	2	10437724	10437844
Mir466b-1	ENSMUSG00000076955	2	10395842	10395931
Mir466b-4	ENSMUSG00000077035	2	10408050	10408139
AL772216.41	ENSMUSG00000092882	2	10428182	10428308
Mir467a-5	ENSMUSG00000076159	2	10410226	10410308
Mir466e	ENSMUSG00000077071	2	10400713	10400798
AL772216.3	ENSMUSG00000077131	2	10389696	10389799
Mir669m-2	ENSMUSG00000088980	2	10435061	10435158
Mir467a-8	ENSMUSG00000076157	2	10417607	10417689
AL772216.9	ENSMUSG00000080418	2	10416509	10416635
AL772216.13	ENSMUSG00000080472	2	10406117	10406240
AL772216.35	ENSMUSG00000080674	2	10401792	10401918
Mir669a-6	ENSMUSG00000076024	2	10405819	10405915
Mir467d	ENSMUSG00000077021	2	10429257	10429341
SNORA17	ENSMUSG00000077733	2	9997280	9997407
Mir669d-2	ENSMUSG00000080504	2	10393271	10393356
AL772216.43	ENSMUSG00000093308	2	10394978	10395104
AL772216.32	ENSMUSG00000080640	2	10411598	10411723
Mir669a-3	ENSMUSG00000076028	2	10396060	10396168
AL772216.5	ENSMUSG00000080362	2	10414247	10414366
Mir466n	ENSMUSG00000077991	2	10435368	10435461
AL772216.36	ENSMUSG00000080684	2	10423260	10423381
Mir467a-1	ENSMUSG00000076162	2	10397973	10398045
AL772216.18	ENSMUSG00000080500	2	10386914	10387034
Mir466b-6	ENSMUSG00000077060	2	10415425	10415514
mmu-mir-467a	ENSMUSG00000076155	2	10422449	10422531
Mir669k	ENSMUSG00000080652	2	10396927	10397036
Mir466b-3	ENSMUSG00000076994	2	10425192	10425272
Mir467c	ENSMUSG00000077049	2	10395558	10395654
Mir466b-7	ENSMUSG00000077088	2	10417895	10417982
Mir669a-12	ENSMUSG00000076019	2	10425414	10425510
mmu-mir-669k	ENSMUSG00000080466	2	10423818	10423944
Mir466f-1	ENSMUSG00000077972	2	10388571	10388664
Mir669j	ENSMUSG00000080611	2	10399537	10399657
AL772216.16	ENSMUSG00000080488	2	10404239	10404365
Mir669a-2	ENSMUSG00000076014	2	10431791	10431887
AL772216.15	ENSMUSG00000080477	2	10411794	10411914
AL772216.39	ENSMUSG00000088833	2	10432997	10433092
AL772216.2	ENSMUSG00000077104	2	10431512	10431611
Mir669e	ENSMUSG00000080653	2	10389122	10389240
Mir669o	ENSMUSG00000077086	2	10435927	10436022
Mir669a-11	ENSMUSG00000076017	2	10422962	10423058
AL772216.25	ENSMUSG00000080571	2	10408573	10408695
AL772216.21	ENSMUSG00000080550	2	10426274	10426400
AL772216.4	ENSMUSG00000080332	2	10421390	10421516
Mir4660	ENSMUSG00000078026	2	10394167	10394250
AL772216.22	ENSMUSG00000080554	2	10416706	10416826
Mir297a-4	ENSMUSG00000077954	2	10438694	10438791
Mir669f	ENSMUSG00000077038	2	10388856	10388976
Mir466c-1	ENSMUSG00000077136	2	10403158	10403247
AL772216.14	ENSMUSG00000080476	2	10421593	10421710
Mir669a-1	ENSMUSG00000076027	2	10398480	10398576
Mir669p-2	ENSMUSG00000077056	2	10418124	10418210
AL772216.7	ENSMUSG00000080400	2	10397127	10397247
AL772216.20	ENSMUSG00000080548	2	10409134	10409260
Mir669g	ENSMUSG00000080459	2	10398777	10398899
mmu-mir-669a-1	ENSMUSG00000076018	2	10433830	10433926
Mir669l	ENSMUSG00000076959	2	10390598	10390695
AL772216.26	ENSMUSG00000080598	2	10411037	10411160
AL772216.40	ENSMUSG00000092697	2	10432418	10432519
AL772216.11	ENSMUSG00000080442	2	10419175	10419295
Mir466h	ENSMUSG00000077941	2	10436518	10436598
mmu-mir-466c	ENSMUSG00000076979	2	10412963	10413052
AL772216.28	ENSMUSG00000080604	2	10399337	10399463
Mir467a-4	ENSMUSG00000076160	2	10407762	10407844
Mir466	ENSMUSG00000070099	2	10429545	10429617
Gm13265	ENSMUSG00000081367	2	10820293	10820675
Gm13263	ENSMUSG00000082871	2	10880755	10881550
SNORA68	ENSMUSG00000089007	2	10936389	10936517
Prkcq	ENSMUSG00000026778	2	11093740	11222853
Pfkfb3	ENSMUSG00000026773	2	11393057	11423728
Rbm17	ENSMUSG00000037197	2	11507066	11525780
Gm17355	ENSMUSG00000091689	2	11546914	11546967
Gm17490	ENSMUSG00000091312	2	11547233	11547891
Il2ra	ENSMUSG00000026770	2	11564419	11614818
Il15ra	ENSMUSG00000023206	2	11626914	11655613
Fbxo18	ENSMUSG00000058594	2	11664200	11699209
Ankrd16	ENSMUSG00000047909	2	11699503	11711952
Itga8	ENSMUSG00000026768	2	12028259	12223547
Fam188a	ENSMUSG00000026767	2	12268890	12341096
Gm13264	ENSMUSG00000085257	2	10958501	10970693
Gm13297	ENSMUSG00000081693	2	11012506	11013391
Gm13294	ENSMUSG00000083900	2	11021415	11021891
Gm13293	ENSMUSG00000086006	2	11261116	11264239
Gm13295	ENSMUSG00000080905	2	11274141	11274396
Gm13291	ENSMUSG00000086491	2	11306630	11308691
Gm13292	ENSMUSG00000082424	2	11330657	11331658
Gm13296	ENSMUSG00000082314	2	11341849	11342863
Gm13260	ENSMUSG00000082727	2	11529041	11529909
Gm13310	ENSMUSG00000080801	2	12004239	12005630
E030013I19Rik	ENSMUSG00000086843	2	12222574	12232927
Gm13321	ENSMUSG00000083547	2	12343252	12343650
U4	ENSMUSG00000084560	2	11009408	11009540
Pter	ENSMUSG00000026730	2	12845668	12925080
C1ql3	ENSMUSG00000049630	2	12925084	12933374
U3	ENSMUSG00000089566	2	12901131	12901238
Rsu1	ENSMUSG00000026727	2	12998594	13193058
Gm13270	ENSMUSG00000086358	2	13193229	13246418
Cubn	ENSMUSG00000026726	2	13197965	13413551
Trdmt1	ENSMUSG00000026723	2	13430641	13466291
H2afb1	ENSMUSG00000062651	2	17918049	17918573
A930004D18Rik	ENSMUSG00000054057	2	17946820	17959364
2810030E01Rik	ENSMUSG00000054074	2	17962303	17970678
Mllt10	ENSMUSG00000026743	2	17976898	18134017
Dnajc1	ENSMUSG00000026740	2	18117281	18314457
Commd3	ENSMUSG00000051154	2	18594011	18597858
Bmi1	ENSMUSG00000026739	2	18598645	18608256
Gm13334	ENSMUSG00000087182	2	18615659	18620664
BC061194	ENSMUSG00000037708	2	18620628	18672040
Pip4k2a	ENSMUSG00000026737	2	18763882	18919753
4930426L09Rik	ENSMUSG00000026736	2	18919970	18921428
Armc3	ENSMUSG00000037683	2	19120745	19231868
Msrb2	ENSMUSG00000023094	2	19293067	19316603
Ptf1a	ENSMUSG00000026735	2	19367290	19369128
4921504E06Rik	ENSMUSG00000026734	2	19384464	19475541
Otud1	ENSMUSG00000043415	2	19579689	19582217
Gm13329	ENSMUSG00000081116	2	17919868	17920132
Gm13330	ENSMUSG00000085319	2	17954160	17961260
1810059C17Rik	ENSMUSG00000086340	2	17975820	17978240
Gm13351	ENSMUSG00000081619	2	18100656	18101069
Gm13350	ENSMUSG00000083070	2	18170992	18171470
Gm13349	ENSMUSG00000082520	2	18260206	18260616
Gm13354	ENSMUSG00000082742	2	18415996	18416164
Gm13353	ENSMUSG00000081181	2	18489753	18489825
Gm13355	ENSMUSG00000082943	2	18563413	18563729
Gm13352	ENSMUSG00000086882	2	18570712	18570973
Gm20539	ENSMUSG00000092353	2	18664342	18682489
Gm13333	ENSMUSG00000081139	2	18680611	18681391
Gm13332	ENSMUSG00000083281	2	19023328	19024725
4930447M23Rik	ENSMUSG00000087674	2	19265944	19272677
Gm13344	ENSMUSG00000087103	2	19350731	19353610
Gm13336	ENSMUSG00000085388	2	19363135	19368301
1810010K12Rik	ENSMUSG00000056329	2	19373455	19376622
Gm13345	ENSMUSG00000084160	2	19430717	19430944
Gm13348	ENSMUSG00000086621	2	19555661	19558613
Gm13343	ENSMUSG00000080227	2	19573871	19573975
Gm13346	ENSMUSG00000087246	2	19598338	19607784
Gm13347	ENSMUSG00000083893	2	19598878	19600230
SNORA17	ENSMUSG00000077342	2	19612915	19613046
AL928557.1	ENSMUSG00000092814	2	18051079	18051204
U6	ENSMUSG00000064964	2	18080314	18080418
Etl4	ENSMUSG00000036617	2	19831407	20732340
SNORA32	ENSMUSG00000065644	2	19856490	19856580
Gm13361	ENSMUSG00000083777	2	19887594	19889024
Gm13363	ENSMUSG00000060795	2	19914548	19915069
Gm13360	ENSMUSG00000082164	2	19958723	19959521
Gm13328	ENSMUSG00000081128	2	20156672	20157691
U6	ENSMUSG00000065253	2	20202146	20202252
Gm17171	ENSMUSG00000091457	2	20222444	20246297
Gm13335	ENSMUSG00000085477	2	20342197	20354561
Gm13362	ENSMUSG00000086418	2	20631002	20634861
Arhgap21	ENSMUSG00000036591	2	20769546	20890508
Gm13380	ENSMUSG00000085206	2	20843487	20853016
Gm13375	ENSMUSG00000075514	2	20890681	20891624
Gm13377	ENSMUSG00000086821	2	20966435	21063581
Gm13376	ENSMUSG00000087219	2	21018726	21042286
Enkur	ENSMUSG00000026679	2	21102358	21126992
Thnsl1	ENSMUSG00000048550	2	21127351	21136636
Gm13378	ENSMUSG00000084071	2	21165732	21166067
5S_rRNA	ENSMUSG00000089472	2	21092710	21092840
7SK	ENSMUSG00000089576	2	21119317	21119493
Lnp	ENSMUSG00000009207	2	74358348	74417492
Evx2	ENSMUSG00000001815	2	74491049	74497918
Hoxd13	ENSMUSG00000001819	2	74506367	74509656
Hoxd12	ENSMUSG00000001823	2	74512986	74515763
Hoxd11	ENSMUSG00000042499	2	74517449	74525798
Hoxd10	ENSMUSG00000050368	2	74529147	74533163
Gm14396	ENSMUSG00000086077	2	74533577	74535432
Hoxd9	ENSMUSG00000043342	2	74535737	74538265
Hoxd8	ENSMUSG00000027102	2	74542672	74545990
Osbpl6	ENSMUSG00000042359	2	76244565	76438704
Nfe2l2	ENSMUSG00000015839	2	75513570	75542698
Agps	ENSMUSG00000042410	2	75670234	75769407
Ttc30b	ENSMUSG00000075273	2	75773920	75776519
Ttc30a2	ENSMUSG00000075272	2	75814129	75816257
Ttc30a1	ENSMUSG00000075271	2	75817163	75820024
Pde11a	ENSMUSG00000075270	2	75827198	76176831
Cyct	ENSMUSG00000056436	2	76191999	76198507
Rbm45	ENSMUSG00000042369	2	76208041	76221825
4930445N08Rik	ENSMUSG00000087205	2	74417133	74422601
Mrpl23-ps1	ENSMUSG00000075279	2	74429387	74429974
Gm13672	ENSMUSG00000082973	2	74469897	74470355
Gm20440	ENSMUSG00000092315	2	74521503	74532251
1700109F18Rik	ENSMUSG00000052371	2	74541305	74554187
6720416L17Rik	ENSMUSG00000075277	2	74586479	74600953
Gm14424	ENSMUSG00000085015	2	74590741	74591801
Gm14426	ENSMUSG00000086559	2	74592512	74593154
Gm14425	ENSMUSG00000081156	2	74693763	74694368
Gm14427	ENSMUSG00000083837	2	74724429	74725063
Gm13652	ENSMUSG00000087333	2	74962928	74975855
A330043C09Rik	ENSMUSG00000086044	2	74985175	75015715
Gm13654	ENSMUSG00000081406	2	75029091	75029887
Gm13653	ENSMUSG00000075276	2	75030334	75030849
Gm13659	ENSMUSG00000086200	2	75149137	75151238
Gm13658	ENSMUSG00000087504	2	75274114	75282236
Gm13660	ENSMUSG00000086576	2	75297023	75302845
Gm13655	ENSMUSG00000082152	2	75470695	75471439
E030042O20Rik	ENSMUSG00000087222	2	75542827	75548081
Gm13656	ENSMUSG00000087527	2	75567649	75568229
Gm13657	ENSMUSG00000086813	2	75615245	75620363
Gm13669	ENSMUSG00000081833	2	75646415	75646871
Gm13670	ENSMUSG00000082187	2	75660085	75660850
Hnrnpa3	ENSMUSG00000059005	2	75497318	75507464
Hoxd3	ENSMUSG00000079277	2	74549986	74586331
Hoxd4	ENSMUSG00000042464	2	74560035	74567217
Hoxd1	ENSMUSG00000042448	2	74601037	74603200
Mtx2	ENSMUSG00000027099	2	74663860	74716488
AL928905.1	ENSMUSG00000092825	2	76317276	76317386
n-R5s198	ENSMUSG00000084574	2	74773472	74773571
Mir10b	ENSMUSG00000065500	2	74564127	74564194
U6	ENSMUSG00000065237	2	74462699	74462805
AL772404.1	ENSMUSG00000093242	2	75497301	75497374
U6	ENSMUSG00000089015	2	75524797	75524895
Dcdc5	ENSMUSG00000074981	2	106062214	106246308
Mpped2	ENSMUSG00000016386	2	106533426	106708513
2700007P21Rik	ENSMUSG00000027122	2	106802684	106814581
Fshb	ENSMUSG00000027120	2	106896297	106899813
Kcna4	ENSMUSG00000042604	2	107130796	107138659
Gm13993	ENSMUSG00000083506	2	106015686	106070447
Gm14013	ENSMUSG00000081258	2	106105464	106105733
Gm14015	ENSMUSG00000087226	2	106303980	106363260
Gm14014	ENSMUSG00000087225	2	106414948	106420997
BB218582	ENSMUSG00000085218	2	106483071	106490521
Gm13901	ENSMUSG00000085530	2	106756928	106757395
Gm13902	ENSMUSG00000084164	2	106766722	106767326
Gm13900	ENSMUSG00000081966	2	106840905	106841402
Gm13904	ENSMUSG00000082066	2	106851095	106851931
Gm13903	ENSMUSG00000083181	2	106963925	106964117
Gm9864	ENSMUSG00000052005	2	107435787	107440696
Gm13912	ENSMUSG00000086758	2	108023873	108131476
SNORA17	ENSMUSG00000077480	2	107726665	107726796
RNaseP_nuc	ENSMUSG00000089408	2	106937363	106937632
SNORA17	ENSMUSG00000077411	2	107920069	107920199
SCARNA4	ENSMUSG00000088078	2	106649492	106649615
Mettl15	ENSMUSG00000057234	2	108932454	109120905
Kif18a	ENSMUSG00000027115	2	109120895	109181904
Gm13916	ENSMUSG00000083590	2	108286614	108287241
Gm13915	ENSMUSG00000082113	2	108412751	108413681
Gm13913	ENSMUSG00000083347	2	108418287	108418546
Gm13914	ENSMUSG00000083697	2	108573369	108574359
Rpl35a-ps4	ENSMUSG00000083424	2	108715083	108715415
Gm13910	ENSMUSG00000063684	2	108788963	108790390
Gm13923	ENSMUSG00000087544	2	108862844	108865601
Gm13924	ENSMUSG00000084167	2	109298405	109298890
BX813309.1	ENSMUSG00000076987	2	108988746	108988855
Ptprt	ENSMUSG00000053141	2	161347726	162486883
Srsf6	ENSMUSG00000016921	2	162757264	162762857
L3mbtl1	ENSMUSG00000035576	2	162769201	162800258
Sgk2	ENSMUSG00000017868	2	162813066	162839863
Ift52	ENSMUSG00000017858	2	162843090	162871877
Mybl2	ENSMUSG00000017861	2	162880423	162910424
Gtsf1l	ENSMUSG00000070708	2	162912767	162913590
Tox2	ENSMUSG00000074607	2	163028861	163149906
Jph2	ENSMUSG00000017817	2	163161978	163223729
3230401D17Rik	ENSMUSG00000035399	2	163231558	163250433
Gdap1l1	ENSMUSG00000017943	2	163264212	163281060
Fitm2	ENSMUSG00000048486	2	163292115	163298365
2310001K24Rik	ENSMUSG00000053353	2	163298327	163298647
R3hdml	ENSMUSG00000078949	2	163318054	163328348
Hnf4a	ENSMUSG00000017950	2	163332544	163398646
Ttpal	ENSMUSG00000017679	2	163428050	163444749
Serinc3	ENSMUSG00000017707	2	163449008	163470867
0610039K10Rik	ENSMUSG00000058812	2	163470586	163471536
Pkig	ENSMUSG00000035268	2	163484122	163551894
Ada	ENSMUSG00000017697	2	163552320	163575975
C330008G21Rik	ENSMUSG00000084919	2	162216549	162219681
9430021M05Rik	ENSMUSG00000054457	2	162486899	162492845
Gm14246	ENSMUSG00000087536	2	162505191	162506265
Gm11450	ENSMUSG00000082296	2	162631326	162631658
Gm14255	ENSMUSG00000086030	2	162692815	162693930
Gm11451	ENSMUSG00000083567	2	162724630	162725259
Gm11452	ENSMUSG00000082514	2	162733660	162734349
Gm11453	ENSMUSG00000080962	2	162807991	162808997
Gm11454	ENSMUSG00000086152	2	162948342	162969695
Gm14254	ENSMUSG00000086036	2	162978631	162981842
0610008F07Rik	ENSMUSG00000046840	2	163319543	163367456
Gm16316	ENSMUSG00000087129	2	163510740	163518015
U1	ENSMUSG00000088064	2	162642047	162642204
SNORA17	ENSMUSG00000077143	2	162583045	162583170
U6	ENSMUSG00000088408	2	163340252	163340354
AL591584.1	ENSMUSG00000092791	2	162918635	162918759
Wisp2	ENSMUSG00000027656	2	163646597	163658882
Gm14265	ENSMUSG00000082747	2	163660712	163661016
Kcnk15	ENSMUSG00000035238	2	163679387	163685482
Rims4	ENSMUSG00000035226	2	163685487	163744419
Ywhab	ENSMUSG00000018326	2	163820696	163844324
Pabpc1l	ENSMUSG00000054582	2	163851186	163876274
Tomm34	ENSMUSG00000018322	2	163879276	163896905
Stk4	ENSMUSG00000018209	2	163896058	163981260
Kcns1	ENSMUSG00000040164	2	163989355	163996849
Wfdc5	ENSMUSG00000040154	2	164002063	164008478
Wfdc12	ENSMUSG00000042845	2	164014967	164016344
Wfdc15a	ENSMUSG00000051769	2	164024599	164025866
Wfdc15b	ENSMUSG00000018211	2	164040190	164047396
Svs2	ENSMUSG00000040132	2	164061665	164064202
Svs3b	ENSMUSG00000050383	2	164080099	164082376
Svs4	ENSMUSG00000016998	2	164101688	164104195
Svs3a	ENSMUSG00000017003	2	164115004	164117236
Svs6	ENSMUSG00000017000	2	164142487	164144189
Svs5	ENSMUSG00000017004	2	164158476	164160132
Slpi	ENSMUSG00000017002	2	164179806	164214831
Matn4	ENSMUSG00000016995	2	164215129	164230660
Rbpjl	ENSMUSG00000017007	2	164228641	164240948
Sdc4	ENSMUSG00000017009	2	164249747	164269387
Sys1	ENSMUSG00000045503	2	164282464	164305138
Gm20458	ENSMUSG00000090996	2	164286467	164316260
Trp53tg5	ENSMUSG00000017720	2	164295801	164299224
Dbndd2	ENSMUSG00000017734	2	164311606	164318819
Pigt	ENSMUSG00000017721	2	164323020	164333801
Wfdc2	ENSMUSG00000017723	2	164387913	164394010
Spint3	ENSMUSG00000074596	2	164395195	164398959
Wfdc6a	ENSMUSG00000074595	2	164405019	164410947
Spinlw1	ENSMUSG00000017733	2	164413843	164419094
Wfdc8	ENSMUSG00000070533	2	164421958	164439126
Wfdc6b	ENSMUSG00000070531	2	164439022	164443712
Wfdc16	ENSMUSG00000070530	2	164460207	164464302
Wfdc9	ENSMUSG00000074594	2	164475131	164482083
Wfdc10	ENSMUSG00000070529	2	164481440	164482868
Wfdc11	ENSMUSG00000078940	2	164488394	164499587
Wfdc13	ENSMUSG00000067704	2	164510607	164513206
Spint4	ENSMUSG00000017310	2	164524001	164527953
Gm14316	ENSMUSG00000074593	2	164540805	164543568
Wfdc3	ENSMUSG00000076434	2	164556680	164571431
Wfdc3	ENSMUSG00000039951	2	164569065	164571431
Dnttip1	ENSMUSG00000017299	2	164571483	164594107
Gm11455	ENSMUSG00000085538	2	163961439	163966155
A730032A03Rik	ENSMUSG00000085649	2	164003320	164022300
Gm14302	ENSMUSG00000085760	2	164285396	164286455
Gm14317	ENSMUSG00000086179	2	164376030	164385230
Gm11456	ENSMUSG00000083740	2	164468445	164468700
Gm11457	ENSMUSG00000086453	2	164579742	164595166
SNORA17	ENSMUSG00000077671	2	164447422	164447552
n-R5s207	ENSMUSG00000084446	2	163983140	163983257
U6	ENSMUSG00000065797	2	164427436	164427542
7SK	ENSMUSG00000088226	2	164587159	164587474
1700112D23Rik	ENSMUSG00000091329	3	28601589	28680030
Fndc3b	ENSMUSG00000039286	3	27315084	27610229
Tmem212	ENSMUSG00000043164	3	27764988	27795290
Pld1	ENSMUSG00000027695	3	27837602	28032284
Tnik	ENSMUSG00000027692	3	28162136	28574780
Slc2a2	ENSMUSG00000027690	3	28596825	28627278
Gm6505	ENSMUSG00000070522	3	28662453	28664314
Eif5a2	ENSMUSG00000050192	3	28680233	28697768
Gm17485	ENSMUSG00000090783	3	28694778	28701145
Rpl22l1	ENSMUSG00000039221	3	28704358	28706274
Gm1527	ENSMUSG00000074655	3	28791539	28825646
Egfem1	ENSMUSG00000063600	3	28980945	29590126
Mir551b	ENSMUSG00000076120	3	29315745	29315842
AC122490.1	ENSMUSG00000080638	3	28644523	28644604
SNORA81	ENSMUSG00000088772	3	27767035	27767195
Mir446q	ENSMUSG00000092990	3	28318865	28318940
Gm16722	ENSMUSG00000085702	3	29911301	29952107
Mecom	ENSMUSG00000027684	3	29850221	30446930
Gm15462	ENSMUSG00000086189	3	30585007	30591288
Gm10258	ENSMUSG00000069074	3	30166747	30168869
Arpm1	ENSMUSG00000037737	3	30495995	30498861
Mynn	ENSMUSG00000037730	3	30501009	30517414
Lrrc34	ENSMUSG00000027702	3	30523189	30546791
Lrriq4	ENSMUSG00000027703	3	30543429	30571353
Lrrc31	ENSMUSG00000074653	3	30577980	30598765
Telomerase-vert	ENSMUSG00000065361	3	30494268	30494679
Samd7	ENSMUSG00000051860	3	30645215	30666096
Sec62	ENSMUSG00000027706	3	30691798	30720185
Gm15952	ENSMUSG00000085655	3	35831967	35841639
A330050B17Rik	ENSMUSG00000086392	3	35898755	35924028
Gm11548	ENSMUSG00000085320	3	36398726	36405731
Gm11549	ENSMUSG00000085007	3	36413979	36420735
Gm11550	ENSMUSG00000083388	3	36438305	36439003
Gm12377	ENSMUSG00000082548	3	36593724	36593975
Gm12376	ENSMUSG00000084027	3	36723274	36723880
Gm12531	ENSMUSG00000086090	3	36951137	36958957
Gm12582	ENSMUSG00000081705	3	36976577	36977273
Gm12583	ENSMUSG00000082878	3	37007096	37007948
Gm12584	ENSMUSG00000083857	3	37015656	37016760
Gm12532	ENSMUSG00000084754	3	37081807	37087515
Gm13621	ENSMUSG00000081634	3	37098901	37099901
Gm12533	ENSMUSG00000083575	3	37114762	37114899
Gm12534	ENSMUSG00000086517	3	37130255	37131391
Gm12540	ENSMUSG00000083353	3	37225994	37226312
Gm12541	ENSMUSG00000054779	3	37234254	37248662
Gm12563	ENSMUSG00000083696	3	37380414	37380515
Gm12564	ENSMUSG00000080723	3	37455105	37455425
Gm12565	ENSMUSG00000081093	3	37498346	37498994
4930594O21Rik	ENSMUSG00000085677	3	37512835	37514198
Gm15450	ENSMUSG00000063001	3	37613662	37614100
Adad1	ENSMUSG00000027719	3	36962449	37020846
Il2	ENSMUSG00000027720	3	37019445	37024881
Il21	ENSMUSG00000027718	3	37121681	37131540
Cetn4	ENSMUSG00000045031	3	37206671	37211630
Spry1	ENSMUSG00000037211	3	37538869	37543520
Gm5148	ENSMUSG00000058174	3	37613112	37623412
Mccc1	ENSMUSG00000027709	3	35858234	35899600
Ccdc144b	ENSMUSG00000047696	3	35906169	35952469
Acad9	ENSMUSG00000027710	3	35964901	35993866
D3Ertd254e	ENSMUSG00000033883	3	36058444	36065142
Qrfpr	ENSMUSG00000058400	3	36078346	36121197
Anxa5	ENSMUSG00000027712	3	36347847	36374765
1810062G17Rik	ENSMUSG00000027713	3	36375057	36380898
Exosc9	ENSMUSG00000027714	3	36451528	36464651
Ccna2	ENSMUSG00000027715	3	36463788	36471072
Bbs7	ENSMUSG00000037325	3	36472064	36512399
Trpc3	ENSMUSG00000027716	3	36519404	36589089
4932438A13Rik	ENSMUSG00000037270	3	36762028	36951955
Fgf2	ENSMUSG00000037225	3	37211441	37304299
Bbs12	ENSMUSG00000051444	3	37211476	37220375
Nudt6	ENSMUSG00000050174	3	37303832	37319133
Spata5	ENSMUSG00000027722	3	37318818	37478018
AL691478.1	ENSMUSG00000076974	3	37155706	37155815
SNORA17	ENSMUSG00000089123	3	37701466	37701574
Gm7799	ENSMUSG00000087457	3	37858534	37859009
SNORA17	ENSMUSG00000077728	3	37894027	37894157
Rpl21-ps10	ENSMUSG00000064315	3	38006330	38006877
AC162799.1	ENSMUSG00000092986	3	38166760	38167006
Gm16016	ENSMUSG00000083538	3	57332154	57332703
Mab21l1	ENSMUSG00000056947	3	55586432	55589207
F830104G03Rik	ENSMUSG00000074592	3	56693900	56694515
Tm4sf1	ENSMUSG00000027800	3	57089533	57105841
Tm4sf4	ENSMUSG00000027801	3	57229236	57245599
Wwtr1	ENSMUSG00000027803	3	57259571	57379832
Commd2	ENSMUSG00000036513	3	57446826	57455637
Nbea	ENSMUSG00000027799	3	55429127	55987623
Gm16743	ENSMUSG00000084778	3	57424827	57429740
U7	ENSMUSG00000088430	3	57175392	57175451
SNORA17	ENSMUSG00000077710	3	56249204	56249334
SNORA17	ENSMUSG00000077190	3	56858072	56858201
SNORA69	ENSMUSG00000077276	3	55760704	55760835
Gm410	ENSMUSG00000074591	3	57470407	57496459
Rnf13	ENSMUSG00000036503	3	57539993	57639347
F630111L10Rik	ENSMUSG00000074590	3	58954468	58957447
4930449A18Rik	ENSMUSG00000074589	3	59582018	59642534
Clrn1	ENSMUSG00000043850	3	58647950	58689262
C130079G13Rik	ENSMUSG00000036951	3	59729136	59741871
Gm9696	ENSMUSG00000070465	3	59756231	59777516
Aadacl2	ENSMUSG00000091376	3	59810665	59829342
Aadac	ENSMUSG00000027761	3	59835685	59844082
Sucnr1	ENSMUSG00000027762	3	59885791	59891488
Gm10071	ENSMUSG00000059776	3	58791092	58913689
Med12l	ENSMUSG00000056476	3	58810900	59122332
Igsf10	ENSMUSG00000036334	3	59120657	59148178
Gm5538	ENSMUSG00000090527	3	59533708	59556319
Tsc22d2	ENSMUSG00000027806	3	58219437	58270709
Serp1	ENSMUSG00000027808	3	58325891	58329795
Eif2a	ENSMUSG00000027810	3	58329743	58361423
2810407C02Rik	ENSMUSG00000075700	3	58380558	58397055
Fam194a	ENSMUSG00000070471	3	58420222	58441129
Siah2	ENSMUSG00000036432	3	58478860	58496322
Gpr171	ENSMUSG00000050075	3	58900370	58905743
P2ry14	ENSMUSG00000036381	3	58918548	58934546
Gpr87	ENSMUSG00000051431	3	58982845	58999026
P2ry13	ENSMUSG00000036362	3	59011818	59014804
P2ry12	ENSMUSG00000036353	3	59020193	59066753
4930593A02Rik	ENSMUSG00000087019	3	58496511	58601253
U2	ENSMUSG00000088152	3	58782777	58782948
U6	ENSMUSG00000065722	3	58094173	58094279
U6	ENSMUSG00000087815	3	58779552	58779653
U6	ENSMUSG00000084647	3	59931563	59931669
Vmn2r1	ENSMUSG00000027824	3	63885564	63909380
Vmn2r2	ENSMUSG00000043897	3	63920354	63944465
Vmn2r3	ENSMUSG00000091572	3	64062883	64091417
Vmn2r4	ENSMUSG00000092049	3	64192543	64219218
Vmn2r5	ENSMUSG00000068999	3	64294743	64313657
Vmn2r6	ENSMUSG00000090581	3	64341483	64369220
Gm16162	ENSMUSG00000090131	3	63629716	63630366
Gm16129	ENSMUSG00000085290	3	63647038	63647991
Gm9479	ENSMUSG00000090303	3	63856953	63859532
Gm5139	ENSMUSG00000093447	3	63967312	63967560
Gm18294	ENSMUSG00000093416	3	63999496	64017599
Vmn2r-ps4	ENSMUSG00000093503	3	64132582	64136775
Vmn2r-ps5	ENSMUSG00000091967	3	64143487	64161646
Vmn2r-ps6	ENSMUSG00000093395	3	64240805	64242209
Vmn2r-ps7	ENSMUSG00000093546	3	64246522	64247897
RP23-445D13.2	ENSMUSG00000093671	3	64251889	64264017
Vmn2r-ps8	ENSMUSG00000093375	3	64280940	64283241
Gm17548	ENSMUSG00000091540	3	63767555	63772581
Gpr149	ENSMUSG00000043441	3	62332999	62409062
Mme	ENSMUSG00000027820	3	63099794	63186153
Plch1	ENSMUSG00000036834	3	63500156	63703394
E130311K13Rik	ENSMUSG00000048581	3	63718606	63733394
Gmps	ENSMUSG00000027823	3	63780028	63826501
Slc33a1	ENSMUSG00000027822	3	63737429	63768690
U6	ENSMUSG00000088360	3	63574134	63574231
U6	ENSMUSG00000088957	3	63292915	63293020
snoU13	ENSMUSG00000089457	3	63711633	63711734
snoU109	ENSMUSG00000088735	3	64122329	64122486
SCARNA14	ENSMUSG00000089175	3	62956139	62956280
U6	ENSMUSG00000089039	3	63913557	63913659
Gm12488	ENSMUSG00000082000	3	100759364	100759862
Gm12486	ENSMUSG00000082415	3	101010782	101011322
Tpt1-ps1	ENSMUSG00000083546	3	101037383	101037818
Gm12490	ENSMUSG00000081569	3	101064840	101065399
Gm16160	ENSMUSG00000089916	3	102007879	102010189
2410057H14Rik	ENSMUSG00000086745	3	102524154	102539340
Vangl1	ENSMUSG00000027860	3	101960624	102008616
Ngf	ENSMUSG00000027859	3	102273851	102324936
Tspan2	ENSMUSG00000027858	3	102538452	102576215
Mab21l3	ENSMUSG00000044313	3	101616999	101652882
Ttf2	ENSMUSG00000033222	3	100742783	100773586
Cd101	ENSMUSG00000086564	3	100797453	100833479
Ptgfrn	ENSMUSG00000027864	3	100844155	100914201
Cd2	ENSMUSG00000027863	3	101079822	101091862
Gm10355	ENSMUSG00000072381	3	101110484	101111002
Igsf3	ENSMUSG00000042035	3	101181048	101266983
Atp1a1	ENSMUSG00000033161	3	101380142	101408586
Slc22a15	ENSMUSG00000033147	3	101659701	101728376
Nhlh2	ENSMUSG00000048540	3	101814068	101819415
Casq2	ENSMUSG00000027861	3	101890338	101950437
Vtcn1	ENSMUSG00000051076	3	100629382	100699602
Trim45	ENSMUSG00000033233	3	100726125	100740848
Clca5	ENSMUSG00000036960	3	144733229	144762068
Odf2l	ENSMUSG00000028256	3	144781553	144816879
Col24a1	ENSMUSG00000028197	3	144955436	145214975
Znhit6	ENSMUSG00000074182	3	145239172	145268209
Cyr61	ENSMUSG00000028195	3	145309935	145312949
Ddah1	ENSMUSG00000028194	3	145421639	145557241
Bcl10	ENSMUSG00000028191	3	145587322	145597247
2410004B18Rik	ENSMUSG00000036873	3	145600978	145607793
Syde2	ENSMUSG00000036863	3	145650834	145684684
Wdr63	ENSMUSG00000043020	3	145703490	145771094
Mcoln3	ENSMUSG00000036853	3	145780423	145804770
Mcoln2	ENSMUSG00000011008	3	145812797	145858477
Lpar3	ENSMUSG00000036832	3	145883925	145949178
Ssx2ip	ENSMUSG00000036825	3	146067606	146103103
Dnase2b	ENSMUSG00000028185	3	146067777	146259576
Ctbs	ENSMUSG00000028189	3	146113434	146128813
Spata1	ENSMUSG00000028188	3	146120167	146162717
Gng5	ENSMUSG00000068523	3	146162798	146168536
Rpf1	ENSMUSG00000028187	3	146169312	146184387
Uox	ENSMUSG00000028186	3	146260041	146295269
4930503B20Rik	ENSMUSG00000090202	3	146308157	146314281
Samd13	ENSMUSG00000048652	3	146308159	146348556
Prkacb	ENSMUSG00000005034	3	146392543	146475924
Gm10288	ENSMUSG00000070343	3	146501775	146502311
Ttll7	ENSMUSG00000036745	3	146515331	146646973
Gm16325	ENSMUSG00000085810	3	146304896	146314679
Gm17501	ENSMUSG00000090771	3	145313276	145315057
U1	ENSMUSG00000065937	3	145779066	145779218
U6	ENSMUSG00000088218	3	146050706	146050808
AC124987.1	ENSMUSG00000077892	3	146062098	146062181
Lphn2	ENSMUSG00000028184	3	148478550	148652280
Gm9912	ENSMUSG00000053583	3	148848115	148848459
Gm10287	ENSMUSG00000070342	3	148884657	148888709
U6	ENSMUSG00000089269	3	149003867	149003972
U6	ENSMUSG00000065270	3	148691896	148692002
SNORA17	ENSMUSG00000077441	3	148017051	148017182
2610301B20Rik	ENSMUSG00000059482	4	10801645	10826572
Plekhf2	ENSMUSG00000049969	4	10915809	10935074
2310030N02Rik	ENSMUSG00000050323	4	10978192	11003352
Trp53inp1	ENSMUSG00000028211	4	11083578	11101526
Ccne2	ENSMUSG00000028212	4	11118498	11131926
Ints8	ENSMUSG00000040738	4	11126305	11181405
Dpy19l4	ENSMUSG00000045205	4	11188462	11249284
Esrp1	ENSMUSG00000040728	4	11259080	11313930
Gm17283	ENSMUSG00000067549	4	11336959	11407948
1110037F02Rik	ENSMUSG00000040720	4	11413105	11477831
Rad54b	ENSMUSG00000078773	4	11486096	11542952
Rad54b	ENSMUSG00000066307	4	11506812	11511983
Gem	ENSMUSG00000028214	4	11631604	11641899
Cdh17	ENSMUSG00000028217	4	11685294	11745042
Pdp1	ENSMUSG00000049225	4	11885331	11893599
Gm10604	ENSMUSG00000073995	4	11906707	11908412
Tmem67	ENSMUSG00000049488	4	11966502	12017167
C430048L16Rik	ENSMUSG00000052137	4	12016586	12023390
Rbm12b	ENSMUSG00000046667	4	12067411	12073878
Fam92a	ENSMUSG00000028218	4	12080556	12099162
Gm16652	ENSMUSG00000086492	4	11249091	11270100
Gm17454	ENSMUSG00000090438	4	11907816	11915618
1700123O12Rik	ENSMUSG00000086080	4	10407109	10724958
Gm11815	ENSMUSG00000086455	4	10415103	10416509
Gm11813	ENSMUSG00000081361	4	10507959	10508249
Gm12920	ENSMUSG00000083997	4	10740690	10741875
Gm12918	ENSMUSG00000066315	4	10775552	10776240
Gm12919	ENSMUSG00000083220	4	10780990	10782583
Gm11828	ENSMUSG00000081715	4	10873755	10874240
Gm11827	ENSMUSG00000086765	4	11049952	11054145
Gm11829	ENSMUSG00000083025	4	11060474	11060755
Gm11830	ENSMUSG00000081490	4	11071857	11072417
Gm11821	ENSMUSG00000081884	4	11327493	11328471
Gm11822	ENSMUSG00000082255	4	11347497	11347911
Gm11831	ENSMUSG00000086625	4	11428603	11429986
Gm11832	ENSMUSG00000086103	4	11538286	11542154
Gm11833	ENSMUSG00000084046	4	11576794	11577646
1700123M08Rik	ENSMUSG00000085614	4	11893712	11921427
Gm11840	ENSMUSG00000085027	4	11926621	11936190
Gm11842	ENSMUSG00000085467	4	11954652	11968041
Gm11839	ENSMUSG00000083246	4	12041431	12043383
Gm11841	ENSMUSG00000081593	4	12052437	12054399
Gm11843	ENSMUSG00000082676	4	12058698	12059122
Gm11847	ENSMUSG00000060989	4	12159927	12165171
Gm11846	ENSMUSG00000085909	4	12198546	12241730
AL772167.1	ENSMUSG00000080359	4	11876034	11876097
Mir3471-1	ENSMUSG00000092880	4	10772647	10772777
7SK	ENSMUSG00000084518	4	11855571	11855886
U1	ENSMUSG00000089185	4	11206412	11206566
Gm11818	ENSMUSG00000055963	4	12833985	12908618
Gm11820	ENSMUSG00000086227	4	13003287	13023953
n-R5s182	ENSMUSG00000065823	4	12739853	12739959
AL772302.1	ENSMUSG00000080663	4	13194132	13194197
Gm11819	ENSMUSG00000081327	4	13371917	13372288
Gm11826	ENSMUSG00000083328	4	13409863	13410382
Gm11825	ENSMUSG00000081063	4	13533181	13533916
AL928551.1	ENSMUSG00000092795	4	13549790	13549910
Runx1t1	ENSMUSG00000006586	4	13670583	13820796
Gm11823	ENSMUSG00000086927	4	13847101	13922340
SNORA17	ENSMUSG00000077701	4	14006956	14007087
Gm11824	ENSMUSG00000082128	4	14097213	14098058
1700120G11Rik	ENSMUSG00000086068	4	14146643	14164597
Slc26a7	ENSMUSG00000040569	4	14429577	14548952
Lrrc69	ENSMUSG00000023151	4	14550767	14723207
Otud6b	ENSMUSG00000040550	4	14736645	14753734
Gm11838	ENSMUSG00000083280	4	14693482	14693712
Gm11836	ENSMUSG00000081239	4	14361038	14361478
SNORA17	ENSMUSG00000087919	4	14166765	14166891
Tmem55a	ENSMUSG00000028221	4	14791223	14842323
Necab1	ENSMUSG00000040536	4	14879392	15076941
Gm11837	ENSMUSG00000086587	4	14857055	14880177
Gm11844	ENSMUSG00000087241	4	14949729	14959134
Gm11845	ENSMUSG00000083073	4	15081539	15081865
Tmem64	ENSMUSG00000043252	4	15192978	15213900
U6	ENSMUSG00000070270	4	15310295	15310401
Gm11856	ENSMUSG00000080869	4	15413513	15413937
Gm11859	ENSMUSG00000083330	4	15458804	15459258
Gm11857	ENSMUSG00000082673	4	15563316	15563639
Calb1	ENSMUSG00000028222	4	15808411	15835211
Decr1	ENSMUSG00000028223	4	15844387	15872654
Nbn	ENSMUSG00000028224	4	15885072	15919736
Osgin2	ENSMUSG00000041153	4	15924268	15941035
Ripk2	ENSMUSG00000041135	4	16049880	16090794
Gm11858	ENSMUSG00000084181	4	15668077	15668914
Gm11855	ENSMUSG00000081026	4	15746221	15748517
Gm11869	ENSMUSG00000084190	4	15896719	15897075
Gm11870	ENSMUSG00000084408	4	15938152	15939473
Gm11874	ENSMUSG00000081679	4	16047906	16048035
A530072M11Rik	ENSMUSG00000085112	4	16091257	16193372
Gm11865	ENSMUSG00000083725	4	16173416	16176661
Gm11863	ENSMUSG00000083095	4	16290515	16290745
Gm11864	ENSMUSG00000080065	4	16317592	16318811
U7	ENSMUSG00000088612	4	15981421	15981485
AL928542.1	ENSMUSG00000080470	4	15747056	15747176
AL807379.1	ENSMUSG00000092822	4	16056713	16056822
SNORA17	ENSMUSG00000088055	4	15838714	15838781
Gm10598	ENSMUSG00000073883	4	41903740	41905449
Gm10597	ENSMUSG00000073882	4	41905836	41906261
Gm2442	ENSMUSG00000091938	4	41941480	41943464
Gm10596	ENSMUSG00000073880	4	41954088	41955014
Gm3893	ENSMUSG00000078744	4	41961930	41963010
Gm13304	ENSMUSG00000073878	4	41985540	41986640
Gm13306	ENSMUSG00000073877	4	42024159	42029562
Gm13305	ENSMUSG00000073876	4	42029565	42039326
1700045I11Rik	ENSMUSG00000091473	4	42041568	42042058
Gm10595	ENSMUSG00000073875	4	42090151	42090576
Gm10931	ENSMUSG00000078363	4	42214615	42216999
Gm1987	ENSMUSG00000078739	4	42231045	42232176
Gm2023	ENSMUSG00000078736	4	42248504	42250497
Gm10930	ENSMUSG00000078362	4	42285129	42290096
Gm2500	ENSMUSG00000078361	4	42336528	42337018
Gm2002	ENSMUSG00000078735	4	42339260	42349021
Gm2506	ENSMUSG00000078734	4	42349017	42354405
Ccl21c	ENSMUSG00000078732	4	42391951	42393082
Gm7819	ENSMUSG00000078731	4	42415576	42416656
Gm10929	ENSMUSG00000078360	4	42423572	42424498
Gm10594	ENSMUSG00000073873	4	42472325	42472750
4933409K07Rik	ENSMUSG00000073874	4	42473137	42474846
Gm2542	ENSMUSG00000078727	4	42536112	42541707
Gm10592	ENSMUSG00000073871	4	42594227	42595153
Gm2163	ENSMUSG00000078725	4	42602069	42603149
Gm10591	ENSMUSG00000073869	4	42625653	42626784
Ccl27b	ENSMUSG00000066202	4	42664149	42669537
Il11ra2	ENSMUSG00000066201	4	42668807	42679295
Gm9969	ENSMUSG00000055406	4	42681536	42682026
Gm10590	ENSMUSG00000073868	4	42728458	42733425
4930578G10Rik	ENSMUSG00000054885	4	42749077	42859120
Ccl19	ENSMUSG00000071005	4	42768057	42770109
Ccl21a	ENSMUSG00000071003	4	42786392	42787525
Gm12394	ENSMUSG00000078722	4	42795460	42869643
Gm12429	ENSMUSG00000078721	4	42860943	42866760
BC049635	ENSMUSG00000050141	4	42880876	42887106
N28178	ENSMUSG00000036062	4	42929532	42957624
Dnajb5	ENSMUSG00000036052	4	42962686	42972297
1700022I11Rik	ENSMUSG00000028451	4	42982818	42996511
Vcp	ENSMUSG00000028452	4	42992835	43013379
Fancg	ENSMUSG00000028453	4	43015215	43023378
Pigo	ENSMUSG00000028454	4	43030507	43038691
Stoml2	ENSMUSG00000028455	4	43040562	43044582
B230312A22Rik	ENSMUSG00000036002	4	43045286	43059092
Unc13b	ENSMUSG00000028456	4	43071825	43277745
Atp8b5	ENSMUSG00000028457	4	43280031	43386705
Rusc2	ENSMUSG00000035969	4	43394851	43439960
Fam166b	ENSMUSG00000042788	4	43439891	43442006
Tesk1	ENSMUSG00000028458	4	43454811	43460936
Cd72	ENSMUSG00000028459	4	43459334	43467500
Sit1	ENSMUSG00000028460	4	43494953	43496606
Ccdc107	ENSMUSG00000028461	4	43505772	43508793
E130306D19Rik	ENSMUSG00000051517	4	43509014	43512567
Car9	ENSMUSG00000028463	4	43519838	43526601
Tpm2	ENSMUSG00000028464	4	43527583	43536637
Tln1	ENSMUSG00000028465	4	43544391	43575563
Creb3	ENSMUSG00000028466	4	43575204	43579932
Gba2	ENSMUSG00000028467	4	43579800	43591745
Rgp1	ENSMUSG00000028468	4	43591587	43600359
Msmp	ENSMUSG00000078719	4	43596088	43597366
Npr2	ENSMUSG00000028469	4	43644807	43664116
Spag8	ENSMUSG00000066196	4	43664207	43666466
Hint2	ENSMUSG00000028470	4	43667099	43669338
4930412F15Rik	ENSMUSG00000043633	4	43672494	43682017
Tmem8b	ENSMUSG00000078716	4	43681843	43705540
Olfr70	ENSMUSG00000050215	4	43707872	43713679
Olfr71	ENSMUSG00000046450	4	43718500	43723103
Hrct1	ENSMUSG00000071001	4	43740070	43741511
Olfr159	ENSMUSG00000044801	4	43782922	43783881
Olfr156	ENSMUSG00000059448	4	43833207	43834305
Olfr157	ENSMUSG00000059101	4	43847624	43849389
Olfr155	ENSMUSG00000071000	4	43864437	43868335
Gm17599	ENSMUSG00000091065	4	43043871	43045354
Olfr269-ps1	ENSMUSG00000083417	4	43780348	43780649
Olfr29-ps1	ENSMUSG00000081420	4	43794253	43795200
Gm12492	ENSMUSG00000081329	4	43811768	43813127
Gm16972	ENSMUSG00000086983	4	43058906	43066125
Gm13303	ENSMUSG00000082414	4	41896152	41897435
Gm3892	ENSMUSG00000073881	4	41925875	41960431
Gm13299	ENSMUSG00000087577	4	41992336	42024158
Ccl19-ps3	ENSMUSG00000084036	4	42003282	42004894
Gm17167	ENSMUSG00000091542	4	42077721	42106036
Gm13301	ENSMUSG00000083929	4	42087631	42104185
Gm13300	ENSMUSG00000081989	4	42104736	42107058
Gm5859	ENSMUSG00000073879	4	42107582	42109905
Gm17081	ENSMUSG00000090338	4	42110448	42110925
Gm7819	ENSMUSG00000078729	4	42418155	42452715
Gm13309	ENSMUSG00000083726	4	42435300	42436901
Gm10593	ENSMUSG00000073872	4	42566010	42600570
Gm12395	ENSMUSG00000085910	4	42750125	42751626
Gm12454	ENSMUSG00000087142	4	43517300	43521619
Gm12472	ENSMUSG00000085351	4	43600944	43621627
Gm12473	ENSMUSG00000086043	4	43644411	43654405
Gm12481	ENSMUSG00000043770	4	43676833	43677211
5430416O09Rik	ENSMUSG00000028475	4	43742906	43747406
A630077J23Rik	ENSMUSG00000086864	4	43768995	43772336
5S_rRNA	ENSMUSG00000088947	4	43705558	43705689
AL732626.1	ENSMUSG00000092675	4	43644297	43644429
U7	ENSMUSG00000089028	4	43214021	43214085
RNase_MRP	ENSMUSG00000088088	4	43505660	43505930
SNORA17	ENSMUSG00000077552	4	43149371	43149500
Reck	ENSMUSG00000028476	4	43888402	43957678
Glipr2	ENSMUSG00000028480	4	43970273	43991990
Ccin	ENSMUSG00000070999	4	43996376	43998405
Clta	ENSMUSG00000028478	4	44017324	44045718
Gne	ENSMUSG00000028479	4	44046947	44097049
Rnf38	ENSMUSG00000035696	4	44139082	44246661
Gm12503	ENSMUSG00000087326	4	44105504	44122183
Gm12504	ENSMUSG00000084274	4	44134765	44136995
U1	ENSMUSG00000088532	4	44094161	44094272
Mir5106	ENSMUSG00000092677	4	44234067	44234139
Melk	ENSMUSG00000035683	4	44313748	44377547
Gm12677	ENSMUSG00000081127	4	44326299	44326930
Gm12455	ENSMUSG00000083803	4	44395794	44396209
SNORA17	ENSMUSG00000077587	4	44425341	44425467
Pax5	ENSMUSG00000014030	4	44544017	44724318
Mir5120	ENSMUSG00000092761	4	44620363	44620440
Zcchc7	ENSMUSG00000035649	4	44768749	44945087
Gm12462	ENSMUSG00000086211	4	44677287	44698219
Gm12463	ENSMUSG00000080916	4	44765149	44765997
AL805896.1	ENSMUSG00000093332	4	44878179	44878303
Tusc1	ENSMUSG00000054000	4	93000839	93002202
5830433M19Rik	ENSMUSG00000028578	4	94166772	94223487
Gm10306	ENSMUSG00000070900	4	94223237	94223769
Plaa	ENSMUSG00000028577	4	94234205	94269935
Gm12639	ENSMUSG00000081987	4	92636935	92637427
Gm12641	ENSMUSG00000082919	4	92773679	92776605
Gm12642	ENSMUSG00000082325	4	92932104	92932979
Gm12649	ENSMUSG00000084833	4	93119949	93337761
Gm12640	ENSMUSG00000083607	4	93265877	93266186
Gm12650	ENSMUSG00000073797	4	93469024	93469281
Gm12651	ENSMUSG00000083724	4	93570715	93571161
Gm12647	ENSMUSG00000081685	4	93728064	93728328
Gm12648	ENSMUSG00000085931	4	93756267	94092279
Gm12654	ENSMUSG00000081508	4	94062349	94062935
Gm12655	ENSMUSG00000087128	4	94127622	94143871
Gm12656	ENSMUSG00000083359	4	94163723	94164299
Gm12657	ENSMUSG00000063314	4	94260341	94267001
SNORA2	ENSMUSG00000088677	4	94154574	94154674
U6	ENSMUSG00000077195	4	93267670	93267776
U6	ENSMUSG00000088914	4	92533166	92533273
SNORA61	ENSMUSG00000064850	4	93211841	93211968
SNORA61	ENSMUSG00000077622	4	93764981	93765109
7SK	ENSMUSG00000088295	4	94100915	94101175
AL833773.1	ENSMUSG00000077037	4	93405427	93405536
Ift74	ENSMUSG00000028576	4	94281182	94359920
Lrrc19	ENSMUSG00000049799	4	94303344	94316835
Gm17636	ENSMUSG00000091804	4	94318600	94323162
Tek	ENSMUSG00000006386	4	94405980	94541667
4930579C15Rik	ENSMUSG00000028575	4	94573958	94595534
Mysm1	ENSMUSG00000062627	4	94608731	94645791
Jun	ENSMUSG00000052684	4	94715725	94718913
Fggy	ENSMUSG00000028573	4	95224198	95593630
Hook1	ENSMUSG00000028572	4	95633931	95692104
Cyp2j13	ENSMUSG00000028571	4	95694225	95744237
Cyp2j12	ENSMUSG00000081225	4	95766009	95807843
Cyp2j7-ps	ENSMUSG00000081362	4	95861888	95903350
Cyp2j11	ENSMUSG00000066097	4	95961199	96015353
Cyp2j8	ENSMUSG00000082932	4	96111287	96174077
Gm12693	ENSMUSG00000083179	4	94602312	94602794
Gm12694	ENSMUSG00000086251	4	94645894	94695235
Gm12703	ENSMUSG00000052767	4	94696654	94715061
Gm12704	ENSMUSG00000081030	4	94705853	94706316
BC042782	ENSMUSG00000087366	4	94718225	94834009
4930551L18Rik	ENSMUSG00000085377	4	94755774	94758110
Gm12708	ENSMUSG00000084918	4	94860004	94876418
Gm830	ENSMUSG00000084939	4	95131415	95154085
Gm12707	ENSMUSG00000085835	4	95150647	95154092
RP23-356F8.3	ENSMUSG00000093492	4	95228522	95228850
9530080O11Rik	ENSMUSG00000044125	4	95626406	95634346
Hspe1-ps6	ENSMUSG00000083880	4	95739115	95739397
Gm12674	ENSMUSG00000080884	4	95818344	95818549
Gm12673	ENSMUSG00000083801	4	95836898	95837076
Gm12675	ENSMUSG00000082681	4	95856762	95856934
Gm12658	ENSMUSG00000084286	4	95912251	95940961
Gm12659	ENSMUSG00000082119	4	96023002	96046902
n-R5s189	ENSMUSG00000084624	4	94729341	94729454
U1	ENSMUSG00000065745	4	95190735	95190895
Mir872	ENSMUSG00000077921	4	94331848	94331928
Cyp2j6	ENSMUSG00000052914	4	96182829	96220352
Cyp2j9	ENSMUSG00000015224	4	96235120	96258269
Cyp2j5	ENSMUSG00000052520	4	96295464	96330845
Gm12695	ENSMUSG00000078639	4	96390338	96451877
Gm10192	ENSMUSG00000066990	4	96849531	96849857
E130114P18Rik	ENSMUSG00000048747	4	97234824	97444769
Nfia	ENSMUSG00000028565	4	97439425	97868605
Gm12696	ENSMUSG00000084159	4	97188119	97189023
Gm12697	ENSMUSG00000082683	4	97223095	97223761
Gm12676	ENSMUSG00000085710	4	97420859	97424080
Tm2d1	ENSMUSG00000028563	4	98022061	98049997
Inadl	ENSMUSG00000061859	4	98062476	98386294
Gm12691	ENSMUSG00000081096	4	97812835	97813290
Gm12692	ENSMUSG00000082388	4	97901436	97901981
Gm12787	ENSMUSG00000083644	4	97934774	97935266
0610025J13Rik	ENSMUSG00000046683	4	97988089	97998482
Gm12788	ENSMUSG00000082144	4	98019118	98019425
Y_RNA	ENSMUSG00000064883	4	97942416	97942529
U6	ENSMUSG00000088548	4	98050093	98050182
AL671140.1	ENSMUSG00000093135	4	98025885	98025994
Rab28	ENSMUSG00000029128	5	42016215	42099394
Nkx3-2	ENSMUSG00000049691	5	42152404	42155735
Bod1l	ENSMUSG00000061755	5	42178781	42235407
Gm2810	ENSMUSG00000082938	5	40719677	40720666
U2	ENSMUSG00000089393	5	40796989	40797168
Gm16223	ENSMUSG00000067285	5	42459199	42608037
Cpeb2	ENSMUSG00000039782	5	43624702	43680963
Gm7854	ENSMUSG00000085720	5	43626241	43626591
U7	ENSMUSG00000088452	5	43852424	43852479
C1qtnf7	ENSMUSG00000061535	5	43906808	44010056
Gm15865	ENSMUSG00000085529	5	43941169	43949008
Gm15866	ENSMUSG00000087290	5	43948524	43992969
Cc2d2a	ENSMUSG00000039765	5	44053618	44132211
Fbxl5	ENSMUSG00000039753	5	44135855	44212878
Bst1	ENSMUSG00000029082	5	44210125	44234510
Cd38	ENSMUSG00000029084	5	44260048	44303614
Gm16014	ENSMUSG00000086479	5	44267275	44268543
Gm16015	ENSMUSG00000087281	5	44300454	44301124
Gm7879	ENSMUSG00000033036	5	44304412	44304945
Gm5292	ENSMUSG00000059565	5	44335141	44335722
Fgfbp1	ENSMUSG00000048373	5	44370104	44373001
Prom1	ENSMUSG00000029086	5	44384864	44493271
Gm16401	ENSMUSG00000072962	5	44491681	44493752
Tapt1	ENSMUSG00000046985	5	44566403	44617845
Ldb2	ENSMUSG00000039706	5	44863372	45190946
4930431F12Rik	ENSMUSG00000062496	5	45357822	45359106
Gm10205	ENSMUSG00000067331	5	45375100	45375481
Msi1	ENSMUSG00000054256	5	115879608	115905707
4930430O22Rik	ENSMUSG00000057354	5	115886077	115886615
Pla2g1b	ENSMUSG00000029522	5	115916271	115924731
Sirt4	ENSMUSG00000029524	5	115928019	115934734
Pxn	ENSMUSG00000029528	5	115956685	116005996
Rplp0	ENSMUSG00000067274	5	116009476	116013736
Gcn1l1	ENSMUSG00000041638	5	116015263	116072665
Rab35	ENSMUSG00000029518	5	116081938	116097745
Ccdc64	ENSMUSG00000041609	5	116098184	116181630
Cit	ENSMUSG00000029516	5	116295287	116458956
Prkab1	ENSMUSG00000029513	5	116463595	116474517
Tmem233	ENSMUSG00000079278	5	116488764	116533253
Ccdc60	ENSMUSG00000043913	5	116574650	116738994
Hspb8	ENSMUSG00000041548	5	116858500	116872873
Srrm4	ENSMUSG00000063919	5	116889281	117041826
Gstm2-ps1	ENSMUSG00000091578	5	117082917	117083471
4930569F06Rik	ENSMUSG00000041512	5	117271463	117271895
Suds3	ENSMUSG00000066900	5	117541691	117566002
Taok3	ENSMUSG00000061288	5	117570138	117725228
Pebp1	ENSMUSG00000032959	5	117732660	117737634
Gm10399	ENSMUSG00000072688	5	117768754	117769251
Vsig10	ENSMUSG00000066894	5	117769275	117805014
Wsb2	ENSMUSG00000029364	5	117807313	117828610
Gm13832	ENSMUSG00000087292	5	115809087	115872872
Gm13836	ENSMUSG00000081282	5	115941900	115942464
Gm13840	ENSMUSG00000086849	5	115965272	115965956
Gm13841	ENSMUSG00000083833	5	116251568	116252219
Gm14508	ENSMUSG00000085376	5	116459325	116466114
Gm13842	ENSMUSG00000084992	5	116476420	116479239
Gm17420	ENSMUSG00000090728	5	116482155	116482322
C330018A13Rik	ENSMUSG00000086655	5	116573623	116579119
Gm14507	ENSMUSG00000086122	5	116693715	116704962
Gm13837	ENSMUSG00000086055	5	116707670	116708653
Gm13839	ENSMUSG00000087124	5	116751309	116753523
Gm13838	ENSMUSG00000084921	5	116755691	116759369
B230112J18Rik	ENSMUSG00000086715	5	116762369	116768290
4930562A09Rik	ENSMUSG00000086945	5	116840687	116842809
2410137F16Rik	ENSMUSG00000086219	5	116888729	116915496
9530046B11Rik	ENSMUSG00000086047	5	117565227	117568732
Gm15727	ENSMUSG00000081274	5	117798916	117799353
BC051077	ENSMUSG00000091333	5	117762529	117765548
n-R5s174	ENSMUSG00000084587	5	117646564	117646684
U4	ENSMUSG00000075998	5	115939468	115939608
U4	ENSMUSG00000075779	5	115940263	115940403
Rfc5	ENSMUSG00000029363	5	117828112	117839056
Gm15728	ENSMUSG00000086075	5	117839148	117843507
Gsx1	ENSMUSG00000053129	5	148000272	148002523
Gm17398	ENSMUSG00000091377	5	148211130	148213493
Pdx1	ENSMUSG00000029644	5	148081535	148089584
Cdx2	ENSMUSG00000029646	5	148112381	148118846
Prhoxnb	ENSMUSG00000075543	5	148126562	148134016
Flt3	ENSMUSG00000042817	5	148142317	148212065
Pan3	ENSMUSG00000029647	5	148241737	148360078
Flt1	ENSMUSG00000029648	5	148373180	148537587
Pomp	ENSMUSG00000029649	5	148672204	148687354
Slc46a3	ENSMUSG00000029650	5	148690013	148706391
Mtus2	ENSMUSG00000029651	5	148768896	149127641
Slc7a1	ENSMUSG00000041313	5	149138986	149211480
Ubl3	ENSMUSG00000001687	5	149316207	149364365
Mtif3	ENSMUSG00000016510	5	147763149	147775376
Lnx2	ENSMUSG00000016520	5	147828231	147888162
Polr1d	ENSMUSG00000029642	5	147888626	147922937
Gm15633	ENSMUSG00000083988	5	147912138	147912629
2210019I11Rik	ENSMUSG00000092570	5	148040172	148083097
Gm6054	ENSMUSG00000057157	5	148220558	148220935
Gm15721	ENSMUSG00000085565	5	148761458	148768742
Gm10167	ENSMUSG00000066554	5	148994475	148995953
Usp12	ENSMUSG00000029640	5	147546385	147606582
Rpl21	ENSMUSG00000041453	5	147644466	147648608
Rasl11a	ENSMUSG00000029641	5	147656647	147659302
Gm10858	ENSMUSG00000075546	5	147705790	147708726
Gtf3a	ENSMUSG00000016503	5	147760233	147767190
SNORA17	ENSMUSG00000077735	5	148011700	148011829
SNORD102	ENSMUSG00000077185	5	147646410	147646480
SNORA27	ENSMUSG00000077564	5	147646720	147646848
Gm2566	ENSMUSG00000082959	5	150305082	150305622
5730422E09Rik	ENSMUSG00000086085	5	149931141	149995639
Katnal1	ENSMUSG00000041298	5	149685908	149806799
8430423G03Rik	ENSMUSG00000079069	5	149761826	149763234
Gm15409	ENSMUSG00000087272	5	149770854	149773288
Hmgb1	ENSMUSG00000066551	5	149858278	149865089
Uspl1	ENSMUSG00000041264	5	149995926	150027010
Alox5ap	ENSMUSG00000060063	5	150076634	150099621
6330406I15Rik	ENSMUSG00000029659	5	150171051	150234298
4930588N13Rik	ENSMUSG00000029660	5	150242281	150273195
Wdr95	ENSMUSG00000029658	5	150331254	150414470
Hsph1	ENSMUSG00000029657	5	150416862	150438951
2210417A02Rik	ENSMUSG00000086494	5	149553416	149554715
4930505K14Rik	ENSMUSG00000085740	5	149589539	149594656
Gm15407	ENSMUSG00000087647	5	149632343	149640984
Gm15410	ENSMUSG00000085639	5	149758168	149760442
Gm15406	ENSMUSG00000085237	5	149760473	149808142
1810059H22Rik	ENSMUSG00000085455	5	149765324	149781698
Gm15411	ENSMUSG00000085971	5	149807227	149827389
Gm15408	ENSMUSG00000086610	5	149818538	149824352
Gm8615	ENSMUSG00000024437	5	149967022	149967657
BC028471	ENSMUSG00000075529	5	150170211	150196171
Gm20488	ENSMUSG00000092327	5	150171051	150233257
Gm15997	ENSMUSG00000086744	5	150291631	150340605
n-R5s180	ENSMUSG00000064704	5	150092694	150092799
AC122546.1	ENSMUSG00000092674	5	150059530	150059820
n-R5s179	ENSMUSG00000084513	5	149564899	149565016
AC122546.2	ENSMUSG00000092764	5	149957300	149957397
Gm5566	ENSMUSG00000080002	5	150463340	150463798
B3galtl	ENSMUSG00000051950	5	150480805	150565174
Rxfp2	ENSMUSG00000053368	5	150821250	150884759
Fry	ENSMUSG00000056602	5	150921242	151300327
snoU13	ENSMUSG00000087984	5	151290734	151290835
Gm15933	ENSMUSG00000082104	5	151312269	151313913
Zar1l	ENSMUSG00000056586	5	151309630	151320739
Brca2	ENSMUSG00000041147	5	151325205	151372321
Foxp2	ENSMUSG00000029563	6	14851349	15391977
Mdfic	ENSMUSG00000041390	6	15670661	15752169
AC163724.1	ENSMUSG00000093317	6	15354981	15355091
Tfec	ENSMUSG00000029553	6	16783381	16848441
Tes	ENSMUSG00000029552	6	17015149	17055828
Cav2	ENSMUSG00000000058	6	17231185	17239115
Cav1	ENSMUSG00000007655	6	17256335	17291452
Met	ENSMUSG00000009376	6	17413800	17523980
Capza2	ENSMUSG00000015733	6	17586234	17616972
St7	ENSMUSG00000029534	6	17642933	17893025
Wnt2	ENSMUSG00000010797	6	17938940	17980585
Asz1	ENSMUSG00000010796	6	18000964	18059061
Cftr	ENSMUSG00000041301	6	18120687	18272768
Cttnbp2	ENSMUSG00000000416	6	18316478	18465338
Gm5721	ENSMUSG00000081744	6	16875231	16876926
Gm15473	ENSMUSG00000084772	6	17008806	17014996
Gm4876	ENSMUSG00000054556	6	17015010	17121833
D830026I12Rik	ENSMUSG00000085171	6	17147751	17160152
Gm15581	ENSMUSG00000085264	6	17156823	17335604
Gm13898	ENSMUSG00000086409	6	17660598	17661225
Gm13899	ENSMUSG00000081077	6	17661687	17662941
Gm15593	ENSMUSG00000084203	6	18094734	18095741
Gm15596	ENSMUSG00000082289	6	18106337	18107120
Gm15592	ENSMUSG00000087389	6	18220136	18239048
Gm15595	ENSMUSG00000080767	6	18244271	18245231
Gm15594	ENSMUSG00000084947	6	18374684	18377885
U6	ENSMUSG00000064965	6	17386306	17386412
AC027654.1	ENSMUSG00000093271	6	18399271	18399340
Naa38	ENSMUSG00000044155	6	18798579	18805751
Ankrd7	ENSMUSG00000029517	6	18816318	18829586
Gm5874	ENSMUSG00000071568	6	18774552	18775058
Gm16854	ENSMUSG00000085607	6	18794220	18797360
U6	ENSMUSG00000065051	6	18677292	18677398
Gm13854	ENSMUSG00000083728	6	33325111	33327446
Gm13853	ENSMUSG00000087441	6	33934989	33942411
Gm13856	ENSMUSG00000087356	6	34101929	34124235
Gm13855	ENSMUSG00000087613	6	34129232	34136392
Gm14546	ENSMUSG00000086762	6	34240265	34274249
Gm13859	ENSMUSG00000081991	6	34323691	34330789
Gm13858	ENSMUSG00000081196	6	34329467	34330445
Gm13857	ENSMUSG00000084965	6	34369396	34395436
Gm13860	ENSMUSG00000085187	6	34483553	34491387
Gm13861	ENSMUSG00000085382	6	34601354	34603894
Gm14547	ENSMUSG00000086834	6	34677221	34685389
Gm13864	ENSMUSG00000082920	6	34736679	34737463
Gm13862	ENSMUSG00000082118	6	34760631	34760827
Gm13863	ENSMUSG00000082446	6	34770204	34770899
1810058I24Rik	ENSMUSG00000073155	6	35202654	35213496
Nup205	ENSMUSG00000038759	6	35127445	35197590
Exoc4	ENSMUSG00000029763	6	33199085	33923979
Lrguk	ENSMUSG00000056215	6	33979448	34084034
Slc35b4	ENSMUSG00000018999	6	34103380	34127111
Akr1b3	ENSMUSG00000001642	6	34253934	34267497
Akr1b8	ENSMUSG00000029762	6	34304119	34318463
Akr1b10	ENSMUSG00000061758	6	34334218	34346950
Akr1b7	ENSMUSG00000052131	6	34362334	34373142
Bpgm	ENSMUSG00000038871	6	34426207	34455613
Cald1	ENSMUSG00000029761	6	34548500	34725473
Gm11157	ENSMUSG00000079612	6	34619155	34640124
Npn2	ENSMUSG00000060411	6	34676831	34676905
Agbl3	ENSMUSG00000038836	6	34730432	34809459
Tmem140	ENSMUSG00000057137	6	34813146	34824946
3110062M04Rik	ENSMUSG00000046806	6	34821771	34828060
Wdr91	ENSMUSG00000058486	6	34830426	34860876
Stra8	ENSMUSG00000029848	6	34870163	34889342
2010107G12Rik	ENSMUSG00000029847	6	34895278	34929054
Cnot4	ENSMUSG00000038784	6	34972066	35083737
Slc13a4	ENSMUSG00000029843	6	35217957	35258131
U1	ENSMUSG00000087808	6	35193595	35193750
AC115767.1	ENSMUSG00000093110	6	34312598	34312683
Fam180a	ENSMUSG00000047420	6	35262746	35276141
Gm15697	ENSMUSG00000081670	6	38492303	38496074
4930599N23Rik	ENSMUSG00000073144	6	39068407	39098311
8030453O22Rik	ENSMUSG00000085058	6	39477512	39494485
Gm16272	ENSMUSG00000086582	6	39534091	39542783
Fth-ps2	ENSMUSG00000091313	6	39603449	39603964
Jhdm1d	ENSMUSG00000042599	6	39086622	39156788
1110001J03Rik	ENSMUSG00000019689	6	38483502	38489449
Luc7l2	ENSMUSG00000029823	6	38501334	38559470
Klrg2	ENSMUSG00000071537	6	38576660	38587239
Clec2l	ENSMUSG00000079598	6	38613069	38630863
Hipk2	ENSMUSG00000061436	6	38644389	38826189
Braf	ENSMUSG00000002413	6	39553236	39675462
Mrps33	ENSMUSG00000029918	6	39751803	39760987
Gm5567	ENSMUSG00000057716	6	40060252	40198352
Agk	ENSMUSG00000029916	6	40275477	40346761
E330009J07Rik	ENSMUSG00000037172	6	40351374	40386134
Wee2	ENSMUSG00000037159	6	40392862	40416812
Ssbp1	ENSMUSG00000029911	6	40421351	40431822
Tas2r137	ENSMUSG00000052850	6	40441237	40442238
Tas2r108	ENSMUSG00000037140	6	40443591	40444484
Prss37	ENSMUSG00000029909	6	40464823	40469507
Tbxas1	ENSMUSG00000029925	6	38825403	39034584
Parp12	ENSMUSG00000038507	6	39036409	39068348
Gm17451	ENSMUSG00000092140	6	38501531	38504007
Slc37a3	ENSMUSG00000029924	6	39284769	39327706
Rab19	ENSMUSG00000029923	6	39331174	39340379
Mkrn1	ENSMUSG00000029922	6	39347803	39370461
Gm10244	ENSMUSG00000068601	6	39369886	39371293
Dennd2a	ENSMUSG00000038456	6	39412377	39507866
Adck2	ENSMUSG00000046947	6	39523872	39546594
Ndufb2	ENSMUSG00000002416	6	39542573	39553381
AC153624.1	ENSMUSG00000093287	6	39411928	39412231
U6	ENSMUSG00000089422	6	39215843	39215941
SNORA17	ENSMUSG00000077339	6	38963665	38963790
SNORA71	ENSMUSG00000064900	6	39372288	39372418
Olfr461	ENSMUSG00000068259	6	40494035	40494976
Olfr460	ENSMUSG00000045514	6	40521356	40522416
Clec5a	ENSMUSG00000029915	6	40524893	40535820
Tas2r138	ENSMUSG00000058250	6	40562314	40563309
Mgam	ENSMUSG00000068587	6	40578830	40719122
Moxd2	ENSMUSG00000029885	6	40828793	40837493
Trbv1	ENSMUSG00000076461	6	40841295	40841884
Prss58	ENSMUSG00000051936	6	40845261	40850386
Gm17725	ENSMUSG00000091555	6	51329709	51342776
Gm15055	ENSMUSG00000085412	6	52052948	52062531
Gm8078	ENSMUSG00000081979	6	52068241	52068890
Gm15052	ENSMUSG00000082781	6	52081777	52082045
Gm15051	ENSMUSG00000087658	6	52106901	52112118
5730446D14Rik	ENSMUSG00000056445	6	52115673	52119563
Gm15050	ENSMUSG00000087626	6	52122880	52124058
2700086A05Rik	ENSMUSG00000085696	6	52125216	52165075
9930038K12Rik	ENSMUSG00000092475	6	52178246	52180531
9930038K12Rik	ENSMUSG00000056583	6	52180079	52180529
Hoxa11as	ENSMUSG00000086427	6	52194392	52199798
Gm15053	ENSMUSG00000055408	6	52212769	52217597
5730457N03Rik	ENSMUSG00000086126	6	52258383	52264826
Gm8129	ENSMUSG00000059159	6	52296724	52296939
Gm15054	ENSMUSG00000084282	6	52307538	52307818
Gm15572	ENSMUSG00000081872	6	52793103	52793695
Hnrnpa2b1	ENSMUSG00000004980	6	51410433	51419893
Cbx3	ENSMUSG00000029836	6	51420359	51433703
Snx10	ENSMUSG00000038301	6	51473900	51540678
Skap2	ENSMUSG00000059182	6	51809165	51962548
Hoxa1	ENSMUSG00000029844	6	52105366	52108316
Hoxa2	ENSMUSG00000014704	6	52112350	52115412
RP23-103L13.8	ENSMUSG00000093412	6	52113358	52163338
Hoxa3	ENSMUSG00000079560	6	52118509	52163335
5730596B20Rik	ENSMUSG00000056468	6	52127497	52130850
Hoxa4	ENSMUSG00000000942	6	52139670	52141752
Hoxa3	ENSMUSG00000059723	6	52149150	52163335
Hoxa5	ENSMUSG00000038253	6	52151753	52154586
Hoxa6	ENSMUSG00000043219	6	52155430	52161355
Hoxa7	ENSMUSG00000038236	6	52164490	52171853
Hoxa9	ENSMUSG00000038227	6	52173099	52181088
Hoxa10	ENSMUSG00000000938	6	52181196	52190853
Hoxa11	ENSMUSG00000038210	6	52192107	52196213
Hoxa13	ENSMUSG00000038203	6	52207693	52210874
Evx1	ENSMUSG00000005503	6	52263492	52268372
Hibadh	ENSMUSG00000029776	6	52496222	52590383
Nfe2l3	ENSMUSG00000029832	6	51382669	51408767
Tax1bp1	ENSMUSG00000004535	6	52663723	52716774
Jazf1	ENSMUSG00000063568	6	52718791	53018625
SCARNA20	ENSMUSG00000089209	6	52960388	52960526
Mir148a	ENSMUSG00000065505	6	51219811	51219909
SNORA32	ENSMUSG00000064792	6	52589228	52589349
AC153877.1	ENSMUSG00000092936	6	51571631	51571707
Mir196b	ENSMUSG00000065443	6	52180080	52180164
9530026P05Rik	ENSMUSG00000087573	6	92890363	93222883
Fgd5	ENSMUSG00000034037	6	91928872	92025998
Nr2c2	ENSMUSG00000005893	6	92041384	92123051
Mrps25	ENSMUSG00000014551	6	92119519	92134027
Zfyve20	ENSMUSG00000014550	6	92136706	92164919
Trh	ENSMUSG00000005892	6	92192055	92194644
Prickle2	ENSMUSG00000030020	6	92320886	92656139
Adamts9	ENSMUSG00000030022	6	92722693	92893486
A730049H05Rik	ENSMUSG00000048636	6	92766472	92797168
Gm15737	ENSMUSG00000079462	6	92819351	92834405
Magi1	ENSMUSG00000045095	6	93625449	94233316
SNORA17	ENSMUSG00000077180	6	93285452	93285582
SNORA44	ENSMUSG00000089069	6	93840609	93840744
SNORA17	ENSMUSG00000088630	6	93459567	93459696
U6	ENSMUSG00000088627	6	93743766	93743871
Slc25a26	ENSMUSG00000045100	6	94450308	94554642
Bhlhe40	ENSMUSG00000030103	6	108610623	108616919
Arl8b	ENSMUSG00000030105	6	108733053	108773717
Edem1	ENSMUSG00000030104	6	108778635	108809350
Gm4604	ENSMUSG00000091845	6	108090114	108090503
Gm16433	ENSMUSG00000043024	6	108513599	108515582
0610040F04Rik	ENSMUSG00000087341	6	108527033	108610928
Gm17055	ENSMUSG00000090576	6	108606911	108609411
Gm6749	ENSMUSG00000068102	6	108831995	108832405
Setmar	ENSMUSG00000034639	6	108015039	108027116
Sumf1	ENSMUSG00000030101	6	108057022	108135576
Itpr1	ENSMUSG00000030102	6	108163112	108501103
Tas2r129	ENSMUSG00000063762	6	132901120	132910756
Tas2r131	ENSMUSG00000057699	6	132906930	132908551
Tas2r109	ENSMUSG00000062528	6	132930033	132930983
Tas2r103	ENSMUSG00000030196	6	132986181	132987119
Tas2r140	ENSMUSG00000071147	6	133004835	133005834
2700089E24Rik	ENSMUSG00000072704	6	133055257	133057765
5530400C23Rik	ENSMUSG00000055594	6	133242234	133245808
Kap	ENSMUSG00000032758	6	133799873	133803685
Etv6	ENSMUSG00000030199	6	133985718	134220176
Bcl2l14	ENSMUSG00000030200	6	134346336	134388754
Lrp6	ENSMUSG00000030201	6	134396494	134516983
Mansc1	ENSMUSG00000032718	6	134559228	134582506
Loh12cr1	ENSMUSG00000042992	6	134589645	134661202
Dusp16	ENSMUSG00000030203	6	134665488	134742643
Crebl2	ENSMUSG00000032652	6	134780172	134808949
Gpr19	ENSMUSG00000032641	6	134819111	134847943
Gm17088	ENSMUSG00000091438	6	134118897	134122025
Gm17089	ENSMUSG00000092134	6	134183176	134193729
AC122359.1	ENSMUSG00000093148	6	133711706	133711788
AC122520.2	ENSMUSG00000077115	6	133146658	133146767
AC122520.1	ENSMUSG00000077093	6	133141810	133141919
Far2	ENSMUSG00000030303	6	147995781	148131280
Ergic2	ENSMUSG00000030304	6	148127601	148160896
Tmtc1	ENSMUSG00000030306	6	148180952	148392911
Rps4y2	ENSMUSG00000063171	6	148303178	148304120
Ipo8	ENSMUSG00000040029	6	148719205	148779989
Caprin2	ENSMUSG00000030309	6	148791014	148844759
Fam60a	ENSMUSG00000039985	6	148869557	148894989
Dennd5b	ENSMUSG00000030313	6	148936593	149050202
Gm10203	ENSMUSG00000067292	6	149078692	149079232
4833442J19Rik	ENSMUSG00000039958	6	149088371	149099693
Amn1	ENSMUSG00000068250	6	149105669	149137234
2810474O19Rik	ENSMUSG00000032712	6	149257936	149284180
Bicd1	ENSMUSG00000003452	6	149357506	149511851
Gm17524	ENSMUSG00000072657	6	148937251	148939953
Gm15762	ENSMUSG00000086019	6	147658504	147667973
B230104C08Rik	ENSMUSG00000086777	6	147955102	147995861
Gm16583	ENSMUSG00000089948	6	148009377	148016395
Gm17216	ENSMUSG00000084823	6	148161889	148163095
Gm15763	ENSMUSG00000082199	6	148209672	148210074
Gm6313	ENSMUSG00000070995	6	148555308	148562831
4930528G23Rik	ENSMUSG00000084909	6	148608500	148626522
Gm15778	ENSMUSG00000081556	6	148647551	148648158
Gm7618	ENSMUSG00000081338	6	148849490	148849660
3010003L21Rik	ENSMUSG00000085355	6	148893389	148895651
Gm15779	ENSMUSG00000082633	6	148952437	148952848
Gm15781	ENSMUSG00000081532	6	148989502	148989824
Gm15780	ENSMUSG00000082829	6	149021226	149022160
Gm10011	ENSMUSG00000056872	6	149096041	149096387
Gm15782	ENSMUSG00000084083	6	149301904	149302348
Gm15784	ENSMUSG00000081126	6	149310208	149311669
Gm15786	ENSMUSG00000081335	6	149350315	149350764
Gm15783	ENSMUSG00000083351	6	149354344	149355207
Gm15785	ENSMUSG00000082072	6	149382302	149382995
AC140327.1	ENSMUSG00000092945	6	148901604	148901853
U6	ENSMUSG00000065664	6	149001039	149001145
SNORA62	ENSMUSG00000065269	6	148591046	148591182
SNORA3	ENSMUSG00000080536	6	148915838	148915959
U6	ENSMUSG00000065198	6	149022525	149022628
Gm17574	ENSMUSG00000091384	7	19967569	19978067
Gm17375	ENSMUSG00000092002	7	20182642	20187643
Rsph6a	ENSMUSG00000040866	7	19640039	19659796
Dmwd	ENSMUSG00000030410	7	19661598	19668125
Dmpk	ENSMUSG00000030409	7	19669198	19679170
Six5	ENSMUSG00000040841	7	19679943	19683898
Gm4969	ENSMUSG00000085601	7	19686900	19703717
Fbxo46	ENSMUSG00000050428	7	19705208	19723610
Qpctl	ENSMUSG00000030407	7	19725566	19734545
Snrpd2	ENSMUSG00000040824	7	19735071	19738084
Gipr	ENSMUSG00000030406	7	19742474	19751476
Eml2	ENSMUSG00000040811	7	19761770	19791831
Gpr4	ENSMUSG00000044317	7	19797887	19809525
Opa3	ENSMUSG00000052214	7	19813683	19841892
Vasp	ENSMUSG00000030403	7	19842278	19857166
Ppm1n	ENSMUSG00000030402	7	19862156	19865398
Rtn2	ENSMUSG00000030401	7	19868011	19881513
Fosb	ENSMUSG00000003545	7	19888070	19895394
Ercc1	ENSMUSG00000003549	7	19930127	19941873
Cd3eap	ENSMUSG00000047649	7	19942198	19944832
Ppp1r13l	ENSMUSG00000040734	7	19945098	19963882
Ercc2	ENSMUSG00000030400	7	19967359	19981043
Klc3	ENSMUSG00000040714	7	19979786	19989453
Ckm	ENSMUSG00000030399	7	19996443	20006932
Gm17405	ENSMUSG00000091658	7	19996973	19997621
A930016O22Rik	ENSMUSG00000040705	7	20004161	20006766
Mark4	ENSMUSG00000030397	7	20010816	20043843
Exoc3l2	ENSMUSG00000011263	7	20074405	20082109
Bloc1s3	ENSMUSG00000057667	7	20091163	20093680
Trappc6a	ENSMUSG00000002043	7	20094019	20101494
Nkpd1	ENSMUSG00000060621	7	20104080	20110399
Ppp1r37	ENSMUSG00000051403	7	20116316	20147747
Gemin7	ENSMUSG00000044709	7	20150295	20159172
Gm17370	ENSMUSG00000092034	7	19547764	19550522
Gm17589	ENSMUSG00000090995	7	19883609	19886119
Gm16733	ENSMUSG00000085994	7	20355960	20360752
Gm16266	ENSMUSG00000086533	7	19578902	19586571
1700058P15Rik	ENSMUSG00000089636	7	19843841	19845088
Gm20512	ENSMUSG00000092381	7	20300365	20307080
Gm16175	ENSMUSG00000087206	7	20394958	20397221
Gm16174	ENSMUSG00000087593	7	20401902	20403974
Gm16184	ENSMUSG00000089886	7	20497174	20497746
Gm16251	ENSMUSG00000090075	7	20506078	20512956
Vmn1r-ps79	ENSMUSG00000090633	7	20942075	20944167
Psg28	ENSMUSG00000030373	7	19007887	19017404
Psg26	ENSMUSG00000070799	7	19059932	19069498
Psg25	ENSMUSG00000070798	7	19105053	19117576
Psg27	ENSMUSG00000070797	7	19141864	19152654
Psg23	ENSMUSG00000074359	7	19191692	19201850
Psg21	ENSMUSG00000070796	7	19232003	19242074
Psg20	ENSMUSG00000063305	7	19259456	19271534
Psg22	ENSMUSG00000044903	7	19303439	19312597
Psg19	ENSMUSG00000004542	7	19374474	19383859
Psg17	ENSMUSG00000004540	7	19399286	19406956
Mill2	ENSMUSG00000040987	7	19425315	19444003
Pglyrp1	ENSMUSG00000030413	7	19470039	19475787
Ccdc61	ENSMUSG00000074358	7	19476232	19495764
Nova2	ENSMUSG00000030411	7	19510698	19551031
Nanos2	ENSMUSG00000051965	7	19572873	19574311
Gm10676	ENSMUSG00000074355	7	19574903	19578123
Mypop	ENSMUSG00000048481	7	19576594	19587115
Irf2bp1	ENSMUSG00000044030	7	19589414	19592110
Foxa3	ENSMUSG00000040891	7	19598631	19608887
Sympk	ENSMUSG00000023118	7	19609726	19639967
Tomm40	ENSMUSG00000002984	7	20286662	20300787
Pvrl2	ENSMUSG00000062300	7	20301993	20334922
Bcam	ENSMUSG00000002980	7	20341480	20356365
Cblc	ENSMUSG00000040525	7	20364230	20382158
Bcl3	ENSMUSG00000053175	7	20393811	20408119
Gm19345	ENSMUSG00000092216	7	20437352	20443696
Ceacam16	ENSMUSG00000014686	7	20437446	20446648
Ceacam19	ENSMUSG00000049848	7	20461091	20473314
Pvr	ENSMUSG00000040511	7	20488927	20506509
2210010C17Rik	ENSMUSG00000040498	7	20522654	20536092
Rpl7a-ps8	ENSMUSG00000070778	7	20539120	20539932
Ceacam20	ENSMUSG00000070777	7	20550761	20576462
Nlrp9b	ENSMUSG00000060508	7	20593372	20658655
Vmn1r91	ENSMUSG00000090393	7	20686507	20687430
Gm16442	ENSMUSG00000074334	7	20707005	20707928
Vmn1r93	ENSMUSG00000074333	7	20723472	20724437
Vmn1r94	ENSMUSG00000091701	7	20752809	20753726
Vmn1r95	ENSMUSG00000091197	7	20779059	20779982
Gm6164	ENSMUSG00000091161	7	20790033	20790956
Gm4498	ENSMUSG00000091493	7	20818257	20819177
Gm5890	ENSMUSG00000078792	7	20845800	20848183
Gm4133	ENSMUSG00000092347	7	20918491	20919414
Gm5728	ENSMUSG00000078419	7	20959842	20960759
Vmn1r100	ENSMUSG00000074331	7	21003291	21004214
Zfp296	ENSMUSG00000011267	7	20162636	20166005
Clasrp	ENSMUSG00000061028	7	20166393	20189817
Relb	ENSMUSG00000002983	7	20191566	20214787
Clptm1	ENSMUSG00000002981	7	20216930	20250379
Apoc2	ENSMUSG00000002992	7	20256928	20266772
Apoc4	ENSMUSG00000074336	7	20263443	20266765
Apoc1	ENSMUSG00000040564	7	20274833	20278007
Apoe	ENSMUSG00000002985	7	20281458	20284515
U1	ENSMUSG00000064580	7	19827479	19827638
U1	ENSMUSG00000065388	7	20046146	20046284
n-R5s152	ENSMUSG00000070150	7	20595433	20595551
Mir330	ENSMUSG00000065543	7	19766814	19766911
U6	ENSMUSG00000065313	7	19134434	19134540
U6	ENSMUSG00000065368	7	19330452	19330558
Mir343	ENSMUSG00000076315	7	19971992	19972066
Mir3100	ENSMUSG00000092659	7	19672177	19672241
1500002O20Rik	ENSMUSG00000002210	7	25184638	25207797
Lypd5	ENSMUSG00000030484	7	25134243	25138852
1700008P20Rik	ENSMUSG00000055826	7	25118099	25118984
D930028M14Rik	ENSMUSG00000074274	7	25937476	25941642
Dedd2	ENSMUSG00000054499	7	25987859	26004878
Zfp526	ENSMUSG00000046541	7	26006470	26012526
Gsk3a	ENSMUSG00000057177	7	26013277	26022870
Irgc1	ENSMUSG00000062028	7	25216941	25220553
Plaur	ENSMUSG00000046223	7	25247519	25260892
Cadm4	ENSMUSG00000054793	7	25267042	25289558
Zfp428	ENSMUSG00000064264	7	25292025	25300701
Irgq	ENSMUSG00000041037	7	25315667	25323618
2310033E01Rik	ENSMUSG00000011632	7	25326718	25331090
Xrcc1	ENSMUSG00000051768	7	25332169	25358457
Zfp575	ENSMUSG00000066721	7	25368857	25372660
Ethe1	ENSMUSG00000064254	7	25372562	25393944
Phldb3	ENSMUSG00000074277	7	25396347	25414307
Lypd3	ENSMUSG00000057454	7	25421589	25426135
Tex101	ENSMUSG00000062773	7	25453031	25457069
BC049730	ENSMUSG00000045587	7	25494278	25499552
Gm4763	ENSMUSG00000058717	7	25507751	25511082
Cd177	ENSMUSG00000052212	7	25529004	25545330
Ceacam10	ENSMUSG00000054169	7	25562223	25569668
Lypd4	ENSMUSG00000062732	7	25649639	25654960
Dmrtc2	ENSMUSG00000011349	7	25655076	25662670
Rps19	ENSMUSG00000040952	7	25669390	25674825
Cd79a	ENSMUSG00000003379	7	25682400	25687216
Arhgef1	ENSMUSG00000040940	7	25687931	25711611
Vmn1r171	ENSMUSG00000062483	7	24417007	24418587
Vmn1r172	ENSMUSG00000035523	7	24443335	24445682
Vmn1r173	ENSMUSG00000074289	7	24485827	24488332
Vmn1r174	ENSMUSG00000090411	7	24538930	24539871
Vmn1r175	ENSMUSG00000091068	7	24593305	24594219
Vmn1r176	ENSMUSG00000091226	7	24619831	24620745
Vmn1r177	ENSMUSG00000057513	7	24650539	24651468
Vmn1r178	ENSMUSG00000062598	7	24678548	24679462
Vmn1r179	ENSMUSG00000046924	7	24713405	24714376
Vmn1r180	ENSMUSG00000092473	7	24737406	24738375
Vmn1r181	ENSMUSG00000057946	7	24768980	24770059
V1rd19	ENSMUSG00000092456	7	24788110	24789266
Vmn1r183	ENSMUSG00000066723	7	24839793	24840710
Zfp180	ENSMUSG00000057101	7	24866943	24892717
Zfp112	ENSMUSG00000052675	7	24897333	24912971
Zfp235	ENSMUSG00000047603	7	24919193	24927285
Zfp114	ENSMUSG00000068962	7	24961171	24967898
Ceacam1	ENSMUSG00000074272	7	26246721	26262644
Ceacam2	ENSMUSG00000054385	7	26301061	26325023
9130221H12Rik	ENSMUSG00000090330	7	26013706	26015276
Erf	ENSMUSG00000040857	7	26027580	26035780
Cic	ENSMUSG00000005442	7	26052723	26079178
Gm16737	ENSMUSG00000086678	7	25416164	25422935
Zfp111	ENSMUSG00000087598	7	24978966	24996462
Zfp109	ENSMUSG00000074283	7	25013067	25022128
Zfp108	ENSMUSG00000030486	7	25042663	25046933
Zfp93	ENSMUSG00000055305	7	25055439	25061846
Zfp61	ENSMUSG00000050605	7	25072327	25086251
Zfp94	ENSMUSG00000074282	7	25086723	25101685
Vmn1r-ps85	ENSMUSG00000092629	7	24563377	24564266
Gm10175	ENSMUSG00000066724	7	24731811	24732251
Gm15465	ENSMUSG00000082802	7	25107679	25107803
Gm5893	ENSMUSG00000011350	7	25603814	25625294
Gm9844	ENSMUSG00000050347	7	25647221	25647696
RP24-312B12.1	ENSMUSG00000093440	7	25905639	25944941
Gm15495	ENSMUSG00000081732	7	26227171	26228482
Kcnn4	ENSMUSG00000054342	7	25155282	25170228
Pafah1b3	ENSMUSG00000005447	7	26080068	26083005
Prr19	ENSMUSG00000058741	7	26086378	26089152
Tmem145	ENSMUSG00000043843	7	26091125	26101214
Megf8	ENSMUSG00000045039	7	26102183	26150936
Cnfn	ENSMUSG00000063651	7	26152635	26154743
Lipe	ENSMUSG00000003123	7	26164546	26183729
Rabac1	ENSMUSG00000003380	7	25754769	25757747
Atp1a3	ENSMUSG00000040907	7	25763186	25790976
Grik5	ENSMUSG00000003378	7	25794872	25857388
Zfp574	ENSMUSG00000045252	7	25862265	25868511
Pou2f2	ENSMUSG00000008496	7	25876928	25917531
4732471J01Rik	ENSMUSG00000053714	7	26169824	26170592
Cxcl17	ENSMUSG00000060188	7	26185072	26197905
AC159140.1	ENSMUSG00000092947	7	25121357	25121616
Gm7092	ENSMUSG00000074261	7	26399640	26400911
Atp5sl	ENSMUSG00000057229	7	26404433	26410570
B3gnt8	ENSMUSG00000059479	7	26412643	26414509
Bckdha	ENSMUSG00000060376	7	26414871	26443780
Exosc5	ENSMUSG00000061286	7	26444172	26453050
Tmem91	ENSMUSG00000061702	7	26454158	26460185
B9d2	ENSMUSG00000063439	7	26466177	26471577
Tgfb1	ENSMUSG00000002603	7	26472021	26490096
Ccdc97	ENSMUSG00000002608	7	26496125	26504107
Hnrnpul1	ENSMUSG00000040725	7	26506517	26539749
Axl	ENSMUSG00000002602	7	26542292	26573724
Cyp2s1	ENSMUSG00000040703	7	26587494	26601932
Gm4613	ENSMUSG00000090467	7	26613566	26613914
Gm17445	ENSMUSG00000084812	7	26601673	26605673
AC160471.1	ENSMUSG00000092999	7	26653964	26654070
AC119211.1	ENSMUSG00000076445	7	26613651	26613746
Gm6434	ENSMUSG00000091233	7	26667031	26667438
Cyp2b10	ENSMUSG00000030483	7	26682639	26711643
Cyp2b13	ENSMUSG00000040583	7	26846514	26881215
Cyp2b9	ENSMUSG00000040660	7	26958430	26995680
Vmn1r184	ENSMUSG00000046130	7	27051850	27052794
Cyp2a4	ENSMUSG00000074254	7	27092209	27100107
Nlrp9c	ENSMUSG00000040614	7	27107492	27188719
Gm8946	ENSMUSG00000045149	7	26856829	26857995
Gm8902	ENSMUSG00000092464	7	27030918	27032977
Vmn1r-ps86	ENSMUSG00000092514	7	27040099	27040645
Nlrp4a	ENSMUSG00000040601	7	27220132	27261161
Rgs9bp	ENSMUSG00000056043	7	36364017	36370601
Gm17327	ENSMUSG00000090311	7	35009774	35015255
Pdcd2l	ENSMUSG00000002635	7	34969518	34981680
Gpi1	ENSMUSG00000036427	7	34987141	35015308
4931406P16Rik	ENSMUSG00000066571	7	35021726	35098570
Gm6096	ENSMUSG00000078380	7	35036057	35036512
Lsm14a	ENSMUSG00000066568	7	35129665	35174559
Kctd15	ENSMUSG00000030499	7	35424033	35440528
Chst8	ENSMUSG00000060402	7	35459487	35597730
Pepd	ENSMUSG00000063931	7	35697398	35829729
Cebpg	ENSMUSG00000056216	7	35831441	35841522
Cebpa	ENSMUSG00000034957	7	35904312	35906945
Slc7a10	ENSMUSG00000030495	7	35971404	35989917
Lrp3	ENSMUSG00000001802	7	35984852	36000389
Gpatch1	ENSMUSG00000063808	7	36061555	36103459
Rhpn2	ENSMUSG00000030494	7	36119194	36177304
C230052I12Rik	ENSMUSG00000030493	7	36177294	36181836
Rpl23a-ps12	ENSMUSG00000081825	7	34482289	34482756
Gm12782	ENSMUSG00000081714	7	34565836	34566562
Gm12768	ENSMUSG00000081510	7	34629955	34630713
Gm12777	ENSMUSG00000084296	7	34638075	34639837
Gm12757	ENSMUSG00000081317	7	34664314	34665113
Gm12765	ENSMUSG00000083085	7	34722280	34723256
Gm12759	ENSMUSG00000083942	7	34743824	34745005
Gm12773	ENSMUSG00000081962	7	34782018	34782604
Gm12755	ENSMUSG00000081768	7	34783031	34791480
Gm12760	ENSMUSG00000083434	7	34821466	34822451
Gm12779	ENSMUSG00000080947	7	34853574	34853765
Gm12778	ENSMUSG00000081491	7	34960731	34961063
Gm12783	ENSMUSG00000081161	7	34961777	34965023
Gm12762	ENSMUSG00000086526	7	35015439	35019094
Gm12758	ENSMUSG00000085105	7	35019396	35025226
Gm12774	ENSMUSG00000082684	7	35168678	35169093
Gm12764	ENSMUSG00000086184	7	35173684	35179798
Gm12766	ENSMUSG00000085124	7	35223156	35305904
Gm12780	ENSMUSG00000081863	7	35280440	35281084
Gm12784	ENSMUSG00000086631	7	35332225	35341223
Gm12781	ENSMUSG00000085923	7	35438203	35445435
Gm12756	ENSMUSG00000087127	7	35450432	35459018
Ccdc123	ENSMUSG00000023072	7	36182054	36223708
Abpz	ENSMUSG00000046438	7	34522209	34524331
Gm12769	ENSMUSG00000078753	7	34528811	34530122
Abpg	ENSMUSG00000066586	7	34728021	34730059
Abpb	ENSMUSG00000066584	7	34796951	34798961
Abpa	ENSMUSG00000066583	7	34806502	34807900
Gm12776	ENSMUSG00000078752	7	34880450	34885856
Wtip	ENSMUSG00000036459	7	34894562	34918287
Uba2	ENSMUSG00000052997	7	34925708	34954618
Pdcd5	ENSMUSG00000030417	7	36427001	36432540
Dpy19l3	ENSMUSG00000043671	7	36470184	36539473
Ankrd27	ENSMUSG00000034867	7	36371266	36424256
Slc7a9	ENSMUSG00000030492	7	36234056	36251055
Tdrd12	ENSMUSG00000030491	7	36254117	36322764
Nudt19	ENSMUSG00000034875	7	36332204	36341323
SNORA17	ENSMUSG00000077469	7	35728875	35729004
[truncated: 2,095 more rows]

## Sheet: wk14IgG2b-Prn
Gene Name	Ensembl Gene ID	Chromosome	Start	End
Xkr4	ENSMUSG00000051951	1	3195982	3661579
Gm16088	ENSMUSG00000090025	1	3044314	3044814
Gm1992	ENSMUSG00000089699	1	3456668	3503634
U7	ENSMUSG00000089420	1	3773818	3773879
U6	ENSMUSG00000064842	1	3092097	3092206
U7	ENSMUSG00000088390	1	3668961	3669024
Rp1	ENSMUSG00000025900	1	4334224	4350473
Sox17	ENSMUSG00000025902	1	4481009	4486494
U6	ENSMUSG00000064376	1	4519098	4519204
Mrpl15	ENSMUSG00000033845	1	4763287	4775820
U6	ENSMUSG00000088000	1	4713358	4713460
Lypla1	ENSMUSG00000025903	1	4797869	4876851
Tcea1	ENSMUSG00000033813	1	4847775	4887987
Gm6104	ENSMUSG00000062588	1	4869283	4870750
Rgs20	ENSMUSG00000002459	1	4899657	5060366
Gm17100	ENSMUSG00000091305	1	4917109	4917380
Gm16041	ENSMUSG00000085623	1	4960938	4966901
Atp6v1h	ENSMUSG00000033793	1	5073254	5152630
Gm17101	ENSMUSG00000091665	1	5053141	5054728
Oprk1	ENSMUSG00000025905	1	5578574	5596212
AC103663.1	ENSMUSG00000093015	1	5634726	5634826
Npbwr1	ENSMUSG00000033774	1	5903788	5907479
Rb1cc1	ENSMUSG00000025907	1	6196278	6266729
4732440D04Rik	ENSMUSG00000073741	1	6204693	6205373
St18	ENSMUSG00000033740	1	6477312	6851021
4732440D04Rik	ENSMUSG00000090031	1	6203374	6204671
Fam150a	ENSMUSG00000087247	1	6349537	6384812
Pcmtd1	ENSMUSG00000051285	1	7079001	7163707
Gm9826	ENSMUSG00000048538	1	7167820	7169118
Gm16899	ENSMUSG00000086461	1	7339487	7387882
SNORA17	ENSMUSG00000077244	1	7255884	7256013
Sntg1	ENSMUSG00000025909	1	8351556	9289959
Gm16284	ENSMUSG00000086235	1	8458507	8458906
Gm15452	ENSMUSG00000084353	1	8782004	8782243
Gm6152	ENSMUSG00000086195	1	8846009	8846348
Gm7493	ENSMUSG00000066693	1	8953077	8953702
AC163389.1	ENSMUSG00000076135	1	8806219	8806328
AC102703.1	ENSMUSG00000076169	1	8578696	8578805
Cpa6	ENSMUSG00000042501	1	10314801	10710026
Prex2	ENSMUSG00000048960	1	10983546	11293763
A830018L16Rik	ENSMUSG00000057715	1	11404186	11965982
Gm15604	ENSMUSG00000083422	1	10544179	10545634
Gm15603	ENSMUSG00000081417	1	10685204	10685695
SNORA66	ENSMUSG00000088585	1	10911751	10911841
U6	ENSMUSG00000065035	1	10545635	10545741
SNORA40	ENSMUSG00000077318	1	11124192	11124319
U6	ENSMUSG00000064969	1	12365017	12365123
Sulf1	ENSMUSG00000016918	1	12708626	12850452
Slco5a1	ENSMUSG00000025938	1	12856630	12981258
Prdm14	ENSMUSG00000042414	1	13103538	13117244
Ncoa2	ENSMUSG00000005886	1	13129186	13364164
Tram1	ENSMUSG00000025935	1	13554783	13579945
Lactb2	ENSMUSG00000025937	1	13614926	13650627
Xkr9	ENSMUSG00000067813	1	13658852	13691804
Gm17644	ENSMUSG00000066918	1	12657644	12663171
7SK	ENSMUSG00000089358	1	13922459	13922766
U6	ENSMUSG00000087782	1	13324579	13324690
SNORA17	ENSMUSG00000077368	1	13764415	13764545
Eya1	ENSMUSG00000025932	1	14159035	14300281
AC156988.1	ENSMUSG00000093057	1	14172659	14172758
Msc	ENSMUSG00000025930	1	14743427	14746047
Gm9947	ENSMUSG00000054493	1	14745535	14748454
Trpa1	ENSMUSG00000032769	1	14862729	14908943
Gm10566	ENSMUSG00000073737	1	15258880	15259878
Kcnb2	ENSMUSG00000092083	1	15277340	15704376
Kcnb2	ENSMUSG00000090498	1	15702384	15706448
Terf1	ENSMUSG00000025925	1	15795739	15833551
Gm106	ENSMUSG00000032719	1	15843943	15882803
4930444P10Rik	ENSMUSG00000067795	1	16056060	16083406
Rpl7	ENSMUSG00000043716	1	16091376	16094743
Rdh10	ENSMUSG00000025921	1	16095855	16123815
Smt3h2-ps4	ENSMUSG00000081201	1	14829950	14830237
Rpl5-ps1	ENSMUSG00000082193	1	14855153	14856046
SNORA17	ENSMUSG00000077377	1	15747913	15748044
SNORA17	ENSMUSG00000088159	1	15009121	15009240
SNORA17	ENSMUSG00000088829	1	15676016	15676127
7SK	ENSMUSG00000088943	1	15869611	15869913
Stau2	ENSMUSG00000025920	1	16218755	16510193
Gm7568	ENSMUSG00000089982	1	16243673	16258002
Ube2w	ENSMUSG00000025939	1	16559863	16609570
Tceb1	ENSMUSG00000079658	1	16632847	16646946
Tmem70	ENSMUSG00000025940	1	16655288	16668356
Ly96	ENSMUSG00000025779	1	16678537	16699686
Gm5828	ENSMUSG00000091020	1	16757095	16760241
Gm16720	ENSMUSG00000087414	1	16647633	16652359
Jph1	ENSMUSG00000042686	1	16987545	17087879
Gdap1	ENSMUSG00000025777	1	17135443	17154352
Pi15	ENSMUSG00000067780	1	17591982	17621019
Crispld1	ENSMUSG00000025776	1	17717126	17756425
Crisp4	ENSMUSG00000025774	1	18105272	18135983
Defb18	ENSMUSG00000073735	1	18226554	18227524
Defb41	ENSMUSG00000067773	1	18241061	18255219
Gm15386	ENSMUSG00000089923	1	18250605	18255161
Gm16070	ENSMUSG00000085125	1	17666108	17717727
Defb44-ps	ENSMUSG00000070977	1	18200134	18213645
SNORA17	ENSMUSG00000089534	1	17510082	17510192
Tfap2d	ENSMUSG00000042596	1	19093103	19156427
Gm15825	ENSMUSG00000089787	1	19053380	19094921
SNORA17	ENSMUSG00000088800	1	18959843	18959914
Tfap2b	ENSMUSG00000025927	1	19198995	19228815
Gm10075	ENSMUSG00000060128	1	19143391	19144047
SNORD29	ENSMUSG00000084668	1	19503936	19504000
Gm9898	ENSMUSG00000053185	1	30775399	30776806
Phf3	ENSMUSG00000048874	1	30859187	30930539
Ptp4a1	ENSMUSG00000026064	1	30997148	31006615
Gm5698	ENSMUSG00000086151	1	31033795	31035810
Gm5699	ENSMUSG00000087346	1	31054712	31056750
4931428L18Rik	ENSMUSG00000086727	1	31197923	31279506
Lgsn	ENSMUSG00000050217	1	31233251	31261501
4930521A18Rik	ENSMUSG00000026063	1	31279684	31281132
Gm9458	ENSMUSG00000086726	1	31043070	31043798
Gm10307	ENSMUSG00000070960	1	31672836	31673507
Gm7910	ENSMUSG00000082159	1	31792901	31793737
SNORA17	ENSMUSG00000077664	1	31316438	31316564
U6	ENSMUSG00000088620	1	31713477	31713583
Pgap1	ENSMUSG00000070889	1	54537550	54614526
Ankrd44	ENSMUSG00000052331	1	54702184	54983231
Sf3b1	ENSMUSG00000025982	1	55042013	55084322
Coq10b	ENSMUSG00000025981	1	55109614	55129545
Hspd1	ENSMUSG00000025980	1	55134679	55145087
Hspe1	ENSMUSG00000073676	1	55144976	55148151
Mob4	ENSMUSG00000025979	1	55188075	55211743
Rftn2	ENSMUSG00000025978	1	55227003	55283626
Mars2	ENSMUSG00000046994	1	55294021	55296902
Boll	ENSMUSG00000025977	1	55305502	55420313
Plcl1	ENSMUSG00000038349	1	55463232	55808646
Gm16581	ENSMUSG00000089670	1	55184141	55185131
Gm6822	ENSMUSG00000061863	1	55217584	55217897
Gm8292	ENSMUSG00000089944	1	55392211	55392727
Gm6644	ENSMUSG00000073674	1	55500577	55501908
Gm10561	ENSMUSG00000073675	1	55283095	55292466
AC151572.1	ENSMUSG00000089245	1	54826062	54826166
1700066M21Rik	ENSMUSG00000038323	1	57434464	57442267
Ndufb3	ENSMUSG00000026032	1	58643228	58652808
Orc2	ENSMUSG00000026037	1	58519615	58561953
9430016H08Rik	ENSMUSG00000025971	1	57463172	57474797
Fam126b	ENSMUSG00000038174	1	58579650	58643167
Gm17234	ENSMUSG00000091283	1	57966679	57973955
Gm15759	ENSMUSG00000089822	1	58310961	58372500
Gm15834	ENSMUSG00000085054	1	58561992	58580074
Aox3	ENSMUSG00000064294	1	58169974	58257542
Als2	ENSMUSG00000026024	1	59219770	59294075
Gm10068	ENSMUSG00000059647	1	58703452	58705161
Als2cr12	ENSMUSG00000047528	1	58714961	58752833
Cflar	ENSMUSG00000026031	1	58768352	58815728
Casp8	ENSMUSG00000026029	1	58852218	58904347
Trak2	ENSMUSG00000026028	1	58957293	59030274
Stradb	ENSMUSG00000026027	1	59030366	59052559
Als2cr11	ENSMUSG00000047383	1	59053967	59060287
Gm17570	ENSMUSG00000090590	1	59060795	59062069
Als2cr11	ENSMUSG00000072295	1	59107350	59151744
Als2cr4	ENSMUSG00000038079	1	59157438	59177203
Mpp4	ENSMUSG00000079550	1	59177780	59220233
Ppil3	ENSMUSG00000026035	1	58487838	58502330
Aox4	ENSMUSG00000038242	1	58267241	58325441
1110034B05Rik	ENSMUSG00000048495	1	57445081	57463945
Nif3l1	ENSMUSG00000026036	1	58501995	58538660
4930558J18Rik	ENSMUSG00000084958	1	57416066	57434348
Spats2l	ENSMUSG00000038305	1	57831006	58005241
Kctd18	ENSMUSG00000054770	1	58011945	58075800
Sgol2	ENSMUSG00000026039	1	58052815	58082743
Aox1	ENSMUSG00000063558	1	58086775	58163257
Aox3l1	ENSMUSG00000079554	1	58335170	58436108
Bzw1	ENSMUSG00000051223	1	58449980	58463392
Clk1	ENSMUSG00000026034	1	58467033	58480910
SNORA17	ENSMUSG00000077776	1	57479088	57479217
U6	ENSMUSG00000064701	1	58523359	58523465
U1	ENSMUSG00000088353	1	57524714	57524870
SNORA17	ENSMUSG00000089275	1	58211825	58211932
SNORA17	ENSMUSG00000077616	1	59127832	59127962
snoU13	ENSMUSG00000089176	1	57922583	57922684
Cdk15	ENSMUSG00000026023	1	59313750	59409837
Fzd7	ENSMUSG00000041075	1	59538991	59543791
Gm973	ENSMUSG00000047361	1	59573108	59691352
Gm17453	ENSMUSG00000092149	1	59545324	59549449
Sumo1	ENSMUSG00000026021	1	59696278	59727678
7SK	ENSMUSG00000089276	1	59683424	59683508
Lancl1	ENSMUSG00000026000	1	67047091	67085446
Cps1	ENSMUSG00000025991	1	67169600	67277833
Erbb4	ENSMUSG00000062209	1	68078760	69154633
Gm15668	ENSMUSG00000086204	1	67295774	67370183
Kif22-ps	ENSMUSG00000082473	1	67631627	67633610
Gm15669	ENSMUSG00000085075	1	67839055	67851898
Gm15671	ENSMUSG00000087329	1	68051660	68072470
Gm15670	ENSMUSG00000083795	1	68339854	68340300
AC101833.1	ENSMUSG00000093213	1	68020250	68020351
AC101752.1	ENSMUSG00000093566	1	67663549	67663626
SNORA17	ENSMUSG00000077745	1	67303798	67303926
U6atac	ENSMUSG00000080539	1	68431516	68431609
Gm16076	ENSMUSG00000087514	1	69138487	69153314
Gm8840	ENSMUSG00000084332	1	69177488	69177873
Ikzf2	ENSMUSG00000025997	1	69577788	69732534
Spag16	ENSMUSG00000053153	1	69873562	70771706
7SK	ENSMUSG00000089345	1	69968047	69968321
U6atac	ENSMUSG00000080524	1	70001578	70001703
Vwc2l	ENSMUSG00000045648	1	70772289	70931971
Bard1	ENSMUSG00000026196	1	71074072	71149720
Abca12	ENSMUSG00000050296	1	71289664	71461484
Atic	ENSMUSG00000026192	1	71603724	71626205
Fn1	ENSMUSG00000026193	1	71632094	71699774
Apol7d	ENSMUSG00000073652	1	71699411	71709417
Gm5528	ENSMUSG00000060125	1	72050862	72051344
Mreg	ENSMUSG00000039395	1	72205807	72258881
Pecr	ENSMUSG00000026189	1	72305741	72330888
Tmem169	ENSMUSG00000026188	1	72330943	72349678
Xrcc5	ENSMUSG00000026187	1	72353995	72441526
March4	ENSMUSG00000039372	1	72473686	72583504
Smarcal1	ENSMUSG00000039354	1	72629825	72679708
Ankar	ENSMUSG00000039342	1	72689554	72747138
Rpl37a	ENSMUSG00000046330	1	72757834	72760383
Gm16236	ENSMUSG00000089965	1	71086226	71086604
Gm5829	ENSMUSG00000067744	1	71756276	71756629
Gm15843	ENSMUSG00000085812	1	72506073	72506601
D230017M19Rik	ENSMUSG00000085769	1	72283039	72321443
AC120136.3	ENSMUSG00000093333	1	72301582	72301772
AC120136.2	ENSMUSG00000093247	1	72283520	72283710
AC120136.1	ENSMUSG00000093111	1	72290787	72290977
U2	ENSMUSG00000075752	1	72272814	72273004
Igfbp2	ENSMUSG00000039323	1	72871077	72899048
Igfbp5	ENSMUSG00000026185	1	72904506	72921458
Tnp1	ENSMUSG00000026182	1	73061657	73062473
Tns1	ENSMUSG00000055322	1	73956805	74171021
Rufy4	ENSMUSG00000061815	1	74172115	74194797
Cxcr2	ENSMUSG00000026180	1	74200563	74207812
Cxcr1	ENSMUSG00000048480	1	74238359	74241205
Mir1928	ENSMUSG00000087820	1	74253128	74253194
U6	ENSMUSG00000075767	1	74259387	74259493
5S_rRNA	ENSMUSG00000088666	1	73810284	73810409
Arpc2	ENSMUSG00000006304	1	74283071	74314783
Gpbar1	ENSMUSG00000064272	1	74325124	74326198
Aamp	ENSMUSG00000006299	1	74326421	74331254
Pnkd	ENSMUSG00000026179	1	74331504	74400268
Tmbim1	ENSMUSG00000006301	1	74334821	74352196
Gm216	ENSMUSG00000073650	1	74408682	74415895
Slc11a1	ENSMUSG00000026177	1	74421777	74432636
Ctdsp1	ENSMUSG00000026176	1	74438083	74443859
Vil1	ENSMUSG00000026175	1	74455950	74482133
Mir26b	ENSMUSG00000065468	1	74440884	74440968
Sh3bp4	ENSMUSG00000036206	1	90966990	91051643
Agap1	ENSMUSG00000055013	1	91351381	91791857
Gbx2	ENSMUSG00000034486	1	91824537	91829865
D130058E05Rik	ENSMUSG00000092627	1	91826809	91828437
Asb18	ENSMUSG00000067081	1	91849166	91911241
Iqca	ENSMUSG00000026301	1	91938707	92049976
Cxcr7	ENSMUSG00000044337	1	92100555	92113326
Cops8	ENSMUSG00000034432	1	92500000	92509916
Gm9991	ENSMUSG00000056128	1	92571736	92576368
Col6a3	ENSMUSG00000048126	1	92663435	92740529
7SK	ENSMUSG00000088775	1	91581377	91581687
5S_rRNA	ENSMUSG00000088371	1	91459935	91460049
Mlph	ENSMUSG00000026303	1	92811662	92847719
Prlh	ENSMUSG00000090550	1	92849685	92850589
Rab17	ENSMUSG00000026304	1	92854710	92866238
Lrrfip1	ENSMUSG00000026305	1	92895304	93025521
Espnl	ENSMUSG00000049515	1	93218652	93244883
Klhl30	ENSMUSG00000026308	1	93247593	93258993
Fam132b	ENSMUSG00000047443	1	93263007	93270793
Ilkap	ENSMUSG00000026309	1	93271984	93295360
Hes6	ENSMUSG00000067071	1	93308060	93310615
Per2	ENSMUSG00000055866	1	93312561	93355907
Traf3ip1	ENSMUSG00000034292	1	93391245	93425880
Asb1	ENSMUSG00000026311	1	93437142	93456167
Twist2	ENSMUSG00000007805	1	93698038	93744605
Hdac4	ENSMUSG00000073617	1	93825362	93827753
Hdac4	ENSMUSG00000026313	1	93829334	94044970
Ndufa10	ENSMUSG00000026260	1	94335587	94370437
Olfr1416	ENSMUSG00000067064	1	94376258	94377196
Olfr1415	ENSMUSG00000057464	1	94387395	94388330
Olfr1414	ENSMUSG00000042849	1	94407625	94415092
Olfr1413	ENSMUSG00000058904	1	94469702	94470783
Olfr1412	ENSMUSG00000046300	1	94484909	94485874
Olfr1411	ENSMUSG00000062497	1	94493098	94494069
Olfr1410	ENSMUSG00000063583	1	94504416	94505424
Olfr12	ENSMUSG00000061616	1	94516458	94517578
Myeov2	ENSMUSG00000073616	1	94533722	94538562
Otos	ENSMUSG00000044055	1	94540795	94545418
Gpc1	ENSMUSG00000034220	1	94728222	94756775
Ankmy1	ENSMUSG00000034212	1	94766706	94799483
Dusp28	ENSMUSG00000047067	1	94803566	94805197
Rnpepl1	ENSMUSG00000026269	1	94807982	94817415
Capn10	ENSMUSG00000026270	1	94830953	94844518
Gpr35	ENSMUSG00000026271	1	94869696	94882968
Aqp12	ENSMUSG00000045091	1	94902911	94908846
Kif1a	ENSMUSG00000014602	1	94912033	94998442
Gm17672	ENSMUSG00000090847	1	95005394	95007262
Agxt	ENSMUSG00000026272	1	95031822	95041984
2310007B03Rik	ENSMUSG00000034159	1	95047926	95057525
E030010N08Rik	ENSMUSG00000084989	1	95112476	95127649
Sned1	ENSMUSG00000047793	1	95132418	95197642
Mterfd2	ENSMUSG00000026273	1	95195788	95202492
Pask	ENSMUSG00000026274	1	95205347	95240059
Gm17418	ENSMUSG00000079420	1	93885628	93889205
5033417F24Rik	ENSMUSG00000091828	1	94804957	94807341
Mir149	ENSMUSG00000065470	1	94746955	94747020
Ppp1r7	ENSMUSG00000026275	1	95239431	95270066
Ano7	ENSMUSG00000034107	1	95270473	95300079
Hdlbp	ENSMUSG00000034088	1	95302517	95375385
Gm17415	ENSMUSG00000090489	1	95318265	95319065
U6	ENSMUSG00000064389	1	95259832	95259934
Cdh20	ENSMUSG00000050840	1	106665106	106892058
Rnf152	ENSMUSG00000047496	1	107173494	107253287
Pign	ENSMUSG00000056536	1	107417716	107555585
Gm17634	ENSMUSG00000090759	1	107252584	107258201
Gm3608	ENSMUSG00000067017	1	107352560	107353433
Gm15699	ENSMUSG00000089866	1	106808008	106808910
U7	ENSMUSG00000089332	1	106793128	106793191
n-R5s216	ENSMUSG00000084704	1	106777501	106777612
AC101970.1	ENSMUSG00000080661	1	106641247	106641336
7SK	ENSMUSG00000088161	1	106382534	106382863
2310035C23Rik	ENSMUSG00000026319	1	107560438	107651708
Tnfrsf11a	ENSMUSG00000026321	1	107677300	107744558
Zcchc2	ENSMUSG00000038866	1	107886983	107930651
Gm10193	ENSMUSG00000067015	1	107661021	107661251
AC132082.1	ENSMUSG00000076999	1	107471264	107471359
U6	ENSMUSG00000089206	1	107842131	107842237
Phlpp1	ENSMUSG00000044340	1	108068329	108290827
Bcl2	ENSMUSG00000057329	1	108434755	108610851
Kdsr	ENSMUSG00000009905	1	108616987	108656319
Vps4b	ENSMUSG00000009907	1	108660648	108693305
Serpinb5	ENSMUSG00000067006	1	108757750	108779925
Serpinb12	ENSMUSG00000059956	1	108831026	108853657
Serpinb13	ENSMUSG00000048775	1	108877561	108897772
Serpinb3a	ENSMUSG00000044594	1	108942164	108948914
Serpinb3d	ENSMUSG00000058017	1	108974744	108980083
Serpinb3b	ENSMUSG00000073602	1	109050517	109174938
Serpinb3c	ENSMUSG00000073601	1	109167778	109174948
Serpinb11	ENSMUSG00000026327	1	109258506	109277052
Serpinb7	ENSMUSG00000067001	1	109296232	109349266
Serpinb2	ENSMUSG00000062345	1	109408000	109432055
Serpinb10-ps	ENSMUSG00000092572	1	109425580	109445848
D630008O14Rik	ENSMUSG00000054006	1	108438520	108471622
Pou2f3-rs1	ENSMUSG00000083613	1	108784429	108785474
Gm8080	ENSMUSG00000084228	1	108916714	108921902
Gm15388	ENSMUSG00000083884	1	109034421	109035146
Gm8084	ENSMUSG00000080729	1	109088052	109090134
Gm15390	ENSMUSG00000081114	1	109150130	109150867
Gm8089	ENSMUSG00000084189	1	109186918	109198931
Gm15391	ENSMUSG00000087210	1	109281777	109283989
SNORA17	ENSMUSG00000089278	1	109336624	109336754
A130050O07Rik	ENSMUSG00000051480	1	139824747	139826850
Ptprc	ENSMUSG00000026395	1	139959438	140071882
Atp6v1g3	ENSMUSG00000026394	1	140170315	140186037
Nek7	ENSMUSG00000026393	1	140381291	140516273
Lhx9	ENSMUSG00000019230	1	140721763	140745153
2310009B15Rik	ENSMUSG00000079283	1	140748556	140753431
Dennd1b	ENSMUSG00000056268	1	140860013	141072620
Crb1	ENSMUSG00000063681	1	141093633	141273677
Zbtb41	ENSMUSG00000033964	1	141318960	141349582
Aspm	ENSMUSG00000033952	1	141351350	141390667
F13b	ENSMUSG00000026368	1	141398284	141420333
Cfhr1	ENSMUSG00000057037	1	141443639	141456835
4930596I21Rik	ENSMUSG00000086113	1	140874234	140875817
Gm16305	ENSMUSG00000085361	1	140888127	140888598
Gm16304	ENSMUSG00000085481	1	141030468	141031242
Mir181b-1	ENSMUSG00000065458	1	139863216	139863295
n-R5s217	ENSMUSG00000065275	1	140774839	140774954
5S_rRNA	ENSMUSG00000088564	1	139884234	139884353
Mir181a-1	ENSMUSG00000065565	1	139863032	139863118
SNORA17	ENSMUSG00000088715	1	139630895	139631010
Cfhr3	ENSMUSG00000090623	1	141471762	141524888
U6	ENSMUSG00000088974	1	141568181	141568284
Gm4788	ENSMUSG00000070594	1	141594212	141677816
U6	ENSMUSG00000084570	1	141683560	141683663
Pla2g4a	ENSMUSG00000056220	1	151676748	151808420
Ptgs2	ENSMUSG00000032487	1	151947254	151955140
Pdc	ENSMUSG00000006007	1	152166547	152181035
BC003331	ENSMUSG00000006010	1	152208435	152240210
Tpr	ENSMUSG00000006005	1	152239968	152297065
Prg4	ENSMUSG00000006014	1	152296542	152313295
Hmcn1	ENSMUSG00000066842	1	152410657	152840565
Gm17311	ENSMUSG00000091113	1	152006173	152012078
7530420F21Rik	ENSMUSG00000084952	1	151922003	151947004
Gm15443	ENSMUSG00000082588	1	150872358	150873177
Gm15453	ENSMUSG00000081535	1	152112665	152113129
Ska2l-ps	ENSMUSG00000057399	1	152396447	152396809
RP23-454G7.1	ENSMUSG00000093650	1	152472395	152630629
U6	ENSMUSG00000088167	1	151554507	151554612
n-R5s219	ENSMUSG00000077516	1	151688660	151688791
n-R5s218	ENSMUSG00000084532	1	151581880	151581988
1700057K13Rik	ENSMUSG00000026592	1	159029279	159038811
Rasal2	ENSMUSG00000070565	1	159065314	159342726
2810025M15Rik	ENSMUSG00000049881	1	159342483	159350366
BC026585	ENSMUSG00000033488	1	159388711	159419191
Sec16b	ENSMUSG00000026589	1	159436859	159498556
Fam5b	ENSMUSG00000004031	1	160175402	160286391
Astn1	ENSMUSG00000026587	1	160292471	160621917
Pappa2	ENSMUSG00000073530	1	160641862	160887870
1600012P17Rik	ENSMUSG00000047661	1	160888258	160910621
Gm6058	ENSMUSG00000087632	1	159314062	159314460
Gm15486	ENSMUSG00000087093	1	159428006	159441852
Mir488	ENSMUSG00000070103	1	160435756	160435864
Gm4953	ENSMUSG00000061992	1	161098288	161098773
Rfwd2	ENSMUSG00000040782	1	161162457	161277711
AC084287.1	ENSMUSG00000080410	1	161261927	161262009
Scarna3a	ENSMUSG00000089536	1	161270414	161270553
4930523C07Rik	ENSMUSG00000090394	1	161974515	162008559
4930523C07Rik	ENSMUSG00000050883	1	161974715	162001640
4930562F07Rik	ENSMUSG00000026729	1	162004866	162008116
Tnn	ENSMUSG00000026725	1	162015165	162083711
Mrps14	ENSMUSG00000058267	1	162125346	162132301
Cacybp	ENSMUSG00000014226	1	162133056	162142908
Rabgap1l	ENSMUSG00000026721	1	162149305	162723069
Gm6177	ENSMUSG00000057499	1	162823251	162823715
Rc3h1	ENSMUSG00000040423	1	162836549	162905109
Serpinc1	ENSMUSG00000026715	1	162908737	162933141
Zbtb37	ENSMUSG00000043467	1	162938925	162964980
Dars2	ENSMUSG00000026709	1	162970732	163000789
Cenpl	ENSMUSG00000026708	1	163000898	163016855
Klhl20	ENSMUSG00000026705	1	163018506	163061642
Ankrd45	ENSMUSG00000044835	1	163072822	163099237
Prdx6	ENSMUSG00000026701	1	163170243	163181350
Tnfsf4	ENSMUSG00000026700	1	163325581	163348337
Tnfsf18	ENSMUSG00000066755	1	163424786	163435421
Fasl	ENSMUSG00000000817	1	163710820	163718626
AI848100	ENSMUSG00000040297	1	163746243	163806792
4930558K02Rik	ENSMUSG00000086277	1	163872217	163909767
Pigc	ENSMUSG00000026698	1	163899317	163957237
Dnm3	ENSMUSG00000040265	1	163912584	164408165
Gm10529	ENSMUSG00000073527	1	162005293	162005672
Gas5	ENSMUSG00000053332	1	162964553	162968670
4930469G21Rik	ENSMUSG00000049160	1	163084689	163089445
Gm15429	ENSMUSG00000040323	1	163656373	163657620
2810442N19Rik	ENSMUSG00000090260	1	163935100	163946625
SNORD44	ENSMUSG00000084667	1	162966813	162966872
SNORD24	ENSMUSG00000064816	1	162966188	162966270
5S_rRNA	ENSMUSG00000089353	1	163482680	163482797
SNORD77	ENSMUSG00000065735	1	162967732	162967812
SNORD78	ENSMUSG00000077220	1	162967115	162967180
SNORD74	ENSMUSG00000064440	1	162965525	162965604
SNORD75	ENSMUSG00000080463	1	162965981	162966042
SNORD79	ENSMUSG00000065160	1	162967487	162967570
Mir1927	ENSMUSG00000089204	1	162225995	162226103
SNORD81	ENSMUSG00000065228	1	162968439	162968514
SNORA17	ENSMUSG00000077759	1	162575704	162575835
SNORA26	ENSMUSG00000077648	1	162806333	162806453
Snord47	ENSMUSG00000064968	1	162968213	162968289
Dnm3os	ENSMUSG00000078190	1	164147754	164155681
Gm16101	ENSMUSG00000089933	1	164246223	164246652
Mir214	ENSMUSG00000065516	1	164153499	164153608
AC157798.1	ENSMUSG00000093181	1	164080498	164080693
Mir199a-2	ENSMUSG00000070126	1	164147945	164148054
Gm10176	ENSMUSG00000066752	1	164407811	164410074
Mettl13	ENSMUSG00000026694	1	164462258	164478682
Vamp4	ENSMUSG00000026696	1	164500646	164529215
Gm5705	ENSMUSG00000091743	1	164558488	164559114
Myoc	ENSMUSG00000026697	1	164569281	164579824
7420461P10Rik	ENSMUSG00000091060	1	164577334	164588304
Prrc2c	ENSMUSG00000040225	1	164603533	164670681
Fmo4	ENSMUSG00000026692	1	164724014	164744103
Fmo1	ENSMUSG00000040181	1	164759692	164796679
Fmo2	ENSMUSG00000040170	1	164804448	164828857
Fmo3	ENSMUSG00000026691	1	164883933	164914659
4921528O07Rik	ENSMUSG00000071890	1	164954433	165015801
Prrx1	ENSMUSG00000026586	1	165175247	165243841
Gorab	ENSMUSG00000040124	1	165315040	165333772
Mettl11b	ENSMUSG00000040113	1	165632388	165655363
Kifap3	ENSMUSG00000026585	1	165709714	165847240
Scyl3	ENSMUSG00000026584	1	165859231	165885257
Gm17698	ENSMUSG00000090335	1	165231921	165233751
Gm20471	ENSMUSG00000092188	1	165210487	165217176
Gm2343	ENSMUSG00000089700	1	165659700	165660741
U6atac	ENSMUSG00000088951	1	165332414	165332521
SNORA17	ENSMUSG00000077608	1	164984949	164985082
SNORA40	ENSMUSG00000089174	1	165048358	165048479
BC055324	ENSMUSG00000041406	1	165876124	165924927
2810422O20Rik	ENSMUSG00000041396	1	165925020	165927374
Sele	ENSMUSG00000026582	1	165978365	165987808
Sell	ENSMUSG00000026581	1	165992207	166010916
Selp	ENSMUSG00000026580	1	166045395	166080157
Gm16587	ENSMUSG00000090081	1	166073563	166076497
F5	ENSMUSG00000026579	1	166081969	166150408
Gm16548	ENSMUSG00000086593	1	166078722	166082348
Gm16588	ENSMUSG00000089790	1	166096710	166097064
Slc19a2	ENSMUSG00000040918	1	166179177	166195516
4930455F23Rik	ENSMUSG00000026578	1	166205716	166217978
Blzf1	ENSMUSG00000026577	1	166219931	166237620
Nme7	ENSMUSG00000026575	1	166243010	166334805
Atp1b1	ENSMUSG00000026576	1	166367398	166388486
Gm16608	ENSMUSG00000086116	1	166433438	166445013
Dpt	ENSMUSG00000026574	1	166726863	166754397
Xcl1	ENSMUSG00000026573	1	166861775	166865658
AC133891.1	ENSMUSG00000080561	1	166954476	166954587
Tbx19	ENSMUSG00000026572	1	167067986	167090904
Gm16550	ENSMUSG00000089967	1	167078955	167079080
Sft2d2	ENSMUSG00000040848	1	167104472	167124564
Tiprl	ENSMUSG00000040843	1	167145053	167167074
Gpr161	ENSMUSG00000040836	1	167232756	167253061
Dcaf6	ENSMUSG00000026571	1	167259642	167390596
Brp44	ENSMUSG00000026568	1	167391168	167411345
SNORA17	ENSMUSG00000089299	1	167370756	167370840
Adcy10	ENSMUSG00000026567	1	167415314	167506905
7SK	ENSMUSG00000087886	1	167428130	167428380
SNORA18	ENSMUSG00000089291	1	167501981	167502107
Mpzl1	ENSMUSG00000026566	1	167522312	167564672
Rcsd1	ENSMUSG00000040723	1	167579076	167638225
Creg1	ENSMUSG00000040713	1	167693877	167705439
Cd247	ENSMUSG00000005763	1	167718812	167807407
Gm16565	ENSMUSG00000089829	1	167711206	167719498
5S_rRNA	ENSMUSG00000088618	1	167715965	167716082
U6	ENSMUSG00000070191	1	167739767	167739873
Pou2f1	ENSMUSG00000026565	1	167795285	167932809
Gm17444	ENSMUSG00000091458	1	167933089	167968389
Dusp27	ENSMUSG00000026564	1	168028284	168058029
Gpa33	ENSMUSG00000000544	1	168060369	168096641
Mael	ENSMUSG00000040629	1	168131516	168168875
Ildr2	ENSMUSG00000040612	1	168184270	168246954
5330438I03Rik	ENSMUSG00000091393	1	168236872	168239716
Tada1	ENSMUSG00000026563	1	168309228	168323752
Pogk	ENSMUSG00000040596	1	168314753	168339994
Gm15853	ENSMUSG00000089853	1	168309970	168310624
Gm16418	ENSMUSG00000084093	1	168361836	168362006
Gm4846	ENSMUSG00000086056	1	168413744	168427719
Gm4847	ENSMUSG00000051081	1	168559102	168577824
mmu-mir-1194	ENSMUSG00000080682	1	168550493	168550613
Fmo9	ENSMUSG00000026560	1	168592186	168611976
Gm4954	ENSMUSG00000085841	1	168692276	168700616
Gm6286	ENSMUSG00000086925	1	168875728	168876489
Gm16701	ENSMUSG00000086622	1	168904155	168930972
Fam78b	ENSMUSG00000060568	1	168931548	169021433
Uck2	ENSMUSG00000053664	1	169153958	169154050
Uck2	ENSMUSG00000026558	1	169156221	169215258
Tmco1	ENSMUSG00000052428	1	169238801	169264109
mmu-mir-2134-1	ENSMUSG00000088246	1	169270500	169270555
Aldh9a1	ENSMUSG00000026687	1	169280122	169298661
U6	ENSMUSG00000064426	1	169279156	169279262
Mgst3	ENSMUSG00000026688	1	169302097	169323972
Lrrc52	ENSMUSG00000040485	1	169375806	169396911
Rxrg	ENSMUSG00000015843	1	169528515	169569754
Lmx1a	ENSMUSG00000026686	1	169619370	169778872
Pbx1	ENSMUSG00000052534	1	170050130	170362401
RP23-45N11.1	ENSMUSG00000093538	1	170045375	170052596
Cd244	ENSMUSG00000004709	1	173489324	173515449
Ly9	ENSMUSG00000004707	1	173518755	173537541
Slamf7	ENSMUSG00000038179	1	173562534	173579149
Cd48	ENSMUSG00000015355	1	173612140	173635389
Slamf1	ENSMUSG00000015316	1	173697258	173731315
Cd84	ENSMUSG00000038147	1	173769828	173820849
Gm10521	ENSMUSG00000073492	1	173825795	173828368
Slamf6	ENSMUSG00000015314	1	173847646	173879083
Vangl2	ENSMUSG00000026556	1	173931091	173958575
Nhlh1	ENSMUSG00000051251	1	173982423	173987704
Ncstn	ENSMUSG00000003458	1	173996144	174012926
Copa	ENSMUSG00000026553	1	174012660	174052461
Pex19	ENSMUSG00000003464	1	174056886	174066624
Dcaf8	ENSMUSG00000026554	1	174078146	174126524
Pea15a	ENSMUSG00000013698	1	174126859	174136935
Casq1	ENSMUSG00000007122	1	174140025	174150026
Atp1a4	ENSMUSG00000007107	1	174153644	174188545
Igsf8	ENSMUSG00000038034	1	174191772	174249972
Atp1a2	ENSMUSG00000007097	1	174201840	174228195
Kcnj9	ENSMUSG00000038026	1	174251164	174259394
Kcnj10	ENSMUSG00000044708	1	174271341	174304216
Pigm	ENSMUSG00000050229	1	174306662	174314230
Slamf9	ENSMUSG00000026548	1	174405489	174408706
Igsf9	ENSMUSG00000037995	1	174411919	174429009
Tagln2	ENSMUSG00000026547	1	174430178	174437511
Ccdc19	ENSMUSG00000026546	1	174451175	174476001
Vsig8	ENSMUSG00000049598	1	174486069	174493848
Slamf8	ENSMUSG00000053318	1	174511508	174520699
Fcrl6	ENSMUSG00000070504	1	174526771	174532682
Dusp23	ENSMUSG00000026544	1	174560900	174563105
Crp	ENSMUSG00000037942	1	174628187	174630097
Apcs	ENSMUSG00000026542	1	174824093	174825185
Olfr16	ENSMUSG00000037924	1	174886899	174887948
Olfr1408	ENSMUSG00000062527	1	175060331	175061367
Olfr1406	ENSMUSG00000058981	1	175113573	175114635
Olfr218	ENSMUSG00000046643	1	175133489	175134430
Olfr1404	ENSMUSG00000049456	1	175145738	175146771
Fcer1a	ENSMUSG00000005339	1	175151402	175157360
Olfr418-ps1	ENSMUSG00000049605	1	175200278	175201268
Gm11062	ENSMUSG00000079180	1	175204592	175207853
Darc	ENSMUSG00000037872	1	175262017	175263634
Cadm3	ENSMUSG00000005338	1	175264385	175297826
Aim2	ENSMUSG00000037860	1	175281010	175396171
Gm4955	ENSMUSG00000037849	1	175398640	175421172
BC094916	ENSMUSG00000070501	1	175449848	175466088
Pydc4	ENSMUSG00000073491	1	175497204	175529405
Gm15431	ENSMUSG00000059058	1	173641219	173641413
Gm10171	ENSMUSG00000089803	1	174074403	174075032
Gm17224	ENSMUSG00000092085	1	174143152	174143811
4933439K11Rik	ENSMUSG00000085184	1	174468264	174488260
Olfr1407-ps1	ENSMUSG00000066680	1	175080262	175080503
7SK	ENSMUSG00000088813	1	174614646	174614972
U6	ENSMUSG00000065390	1	173663430	173663536
U6	ENSMUSG00000088291	1	173662191	173662245
SNORA17	ENSMUSG00000077252	1	174866343	174866465
U6	ENSMUSG00000070182	1	174773665	174773769
Pyhin1	ENSMUSG00000043263	1	175560990	175578059
Pydc3	ENSMUSG00000066677	1	175604042	175628523
AI607873	ENSMUSG00000073490	1	175653814	175671878
Ifi204	ENSMUSG00000073489	1	175677424	175697050
Mndal	ENSMUSG00000090272	1	175787352	175872622
Mnda	ENSMUSG00000026536	1	175826486	175843053
Ifi203	ENSMUSG00000039997	1	175850538	175872803
Ifi202b	ENSMUSG00000026535	1	175892700	175912975
Ifi205	ENSMUSG00000054203	1	175942129	175961886
Olfr433	ENSMUSG00000045381	1	175972064	175973067
Olfr432	ENSMUSG00000047048	1	175980506	175981444
Olfr430	ENSMUSG00000050134	1	175999431	176000384
Olfr429	ENSMUSG00000049528	1	176019169	176020111
Olfr427	ENSMUSG00000059371	1	176029591	176030538
Olfr231	ENSMUSG00000046486	1	176047222	176048145
Olfr424	ENSMUSG00000051528	1	176066877	176067824
Olfr421	ENSMUSG00000091950	1	176081612	176082661
Olfr420	ENSMUSG00000055033	1	176088853	176089898
Spna1	ENSMUSG00000026532	1	176102907	176178581
Olfr419	ENSMUSG00000050788	1	176180020	176181107
1810030J14Rik	ENSMUSG00000026531	1	176260649	176263004
Olfr417	ENSMUSG00000066672	1	176299050	176299979
Olfr248	ENSMUSG00000059503	1	176321177	176322186
Olfr414	ENSMUSG00000051509	1	176360561	176361515
Olfr220	ENSMUSG00000066671	1	176378756	176379733
Fmn2	ENSMUSG00000028354	1	176431956	176752848
Grem2	ENSMUSG00000050069	1	176763916	176851950
Rgs7	ENSMUSG00000026527	1	176989867	177421261
Gm16340	ENSMUSG00000090222	1	175705968	175732851
Fh1	ENSMUSG00000026526	1	177530505	177555766
Kmo	ENSMUSG00000039783	1	177550512	177592247
Opn3	ENSMUSG00000026525	1	177592552	177622907
Chml	ENSMUSG00000078185	1	177616619	177618484
Wdr64	ENSMUSG00000026523	1	177628724	177745865
Kif26b	ENSMUSG00000026494	1	180459256	180862986
Smyd3	ENSMUSG00000055067	1	180882091	181448172
Gm5561	ENSMUSG00000075392	1	181450388	181451039
Tfb2m	ENSMUSG00000026492	1	181458186	181476398
Cnst	ENSMUSG00000038949	1	181476501	181557609
Sccpdh	ENSMUSG00000038936	1	181598341	181617320
Gm1305	ENSMUSG00000087236	1	181625428	181675316
Ahctf1	ENSMUSG00000026491	1	181675025	181733811
Gm10518	ENSMUSG00000073486	1	181733507	181734807
Cdc42bpa	ENSMUSG00000026490	1	181890603	182095734
Adck3	ENSMUSG00000026489	1	182095369	182129733
Psen2	ENSMUSG00000010609	1	182157135	182193569
Gm5069	ENSMUSG00000055676	1	182257102	182260681
Itpkb	ENSMUSG00000038855	1	182260607	182354933
6330403A02Rik	ENSMUSG00000053963	1	182362518	182413598
Parp1	ENSMUSG00000026496	1	182499086	182531384
Lin9	ENSMUSG00000058729	1	182571498	182620816
Mixl1	ENSMUSG00000026497	1	182623174	182627165
Acbd3	ENSMUSG00000026499	1	182656174	182684334
H3f3a	ENSMUSG00000060743	1	182730963	182744074
BC031781	ENSMUSG00000038806	1	182781282	182798228
Lefty2	ENSMUSG00000066652	1	182823239	182829234
Pycr2	ENSMUSG00000026520	1	182834405	182838218
Gm17275	ENSMUSG00000090986	1	182732699	182739614
Gm15480	ENSMUSG00000082395	1	181468548	181469066
Gm16067	ENSMUSG00000073485	1	182743907	182746990
U6	ENSMUSG00000084558	1	182762900	182763007
AC167020.1	ENSMUSG00000092967	1	182663926	182664013
Lefty1	ENSMUSG00000038793	1	182865153	182868531
Tmem63a	ENSMUSG00000026519	1	182872475	182905243
2210411M09Rik	ENSMUSG00000085563	1	182882195	182888280
Ephx1	ENSMUSG00000038776	1	182906286	182951035
9130409I23Rik	ENSMUSG00000038768	1	182981368	182990798
Nvl	ENSMUSG00000026516	1	183023554	183074288
Cnih4	ENSMUSG00000062169	1	183081062	183099125
Wdr26	ENSMUSG00000038733	1	183103359	183142109
A430110L20Rik	ENSMUSG00000054135	1	183156207	183158621
Rpl35a-ps2	ENSMUSG00000081214	1	183172076	183172498
Cnih3	ENSMUSG00000026514	1	183282759	183390772
Gm16547	ENSMUSG00000089888	1	183330595	183330887
Gm16539	ENSMUSG00000089927	1	183361854	183362531
Ccdc121	ENSMUSG00000050625	1	183439764	183441582
Dnahc14	ENSMUSG00000047369	1	183669119	183699805
Capn2	ENSMUSG00000026509	1	184397391	184447655
Gm16721	ENSMUSG00000087419	1	184414398	184414958
Capn8	ENSMUSG00000038599	1	184495138	184562483
4922505E12Rik	ENSMUSG00000043429	1	184677388	184679253
Susd4	ENSMUSG00000038576	1	184693991	184826729
Tlr5	ENSMUSG00000079164	1	184884919	184906175
Gm8214	ENSMUSG00000090533	1	185505657	185506073
Dusp10	ENSMUSG00000039384	1	185837181	185899515
1700056E22Rik	ENSMUSG00000044854	1	185856911	185857453
U6	ENSMUSG00000089057	1	186403988	186404085
Rpl21-ps1	ENSMUSG00000059483	1	186441127	186441609
Hlx	ENSMUSG00000039377	1	186551019	186556498
4930488B22Rik	ENSMUSG00000092578	1	186536376	186542868
Mosc1	ENSMUSG00000026621	1	186610655	186635192
Mosc2	ENSMUSG00000073481	1	186636947	186670330
Mir1981	ENSMUSG00000088559	1	186646286	186646367
7SK	ENSMUSG00000088562	1	186681959	186682291
C130074G19Rik	ENSMUSG00000039349	1	186695805	186707097
Mark1	ENSMUSG00000026620	1	186720322	186823428
Rab3gap2	ENSMUSG00000039318	1	187028047	187110622
Iars2	ENSMUSG00000026618	1	187108605	187153275
Bpnt1	ENSMUSG00000026617	1	187156028	187181656
Eprs	ENSMUSG00000026615	1	187186974	187252234
Slc30a10	ENSMUSG00000026614	1	187278727	187292641
Lyplal1	ENSMUSG00000039246	1	187911610	187941189
Gm2061	ENSMUSG00000085692	1	187270995	187279447
9630028B13Rik	ENSMUSG00000051295	1	187253236	187265698
4930532G15Rik	ENSMUSG00000091047	1	187183340	187186744
Snora36b	ENSMUSG00000077571	1	187066786	187066917
5S_rRNA	ENSMUSG00000089363	1	187947080	187947185
Mir194-1	ENSMUSG00000065581	1	187137198	187137264
Mir215	ENSMUSG00000065562	1	187137460	187137571
Nebl	ENSMUSG00000053702	2	17265536	17653091
H2afb1	ENSMUSG00000062651	2	17918049	17918573
A930004D18Rik	ENSMUSG00000054057	2	17946820	17959364
2810030E01Rik	ENSMUSG00000054074	2	17962303	17970678
Mllt10	ENSMUSG00000026743	2	17976898	18134017
Dnajc1	ENSMUSG00000026740	2	18117281	18314457
Commd3	ENSMUSG00000051154	2	18594011	18597858
Bmi1	ENSMUSG00000026739	2	18598645	18608256
Gm13334	ENSMUSG00000087182	2	18615659	18620664
BC061194	ENSMUSG00000037708	2	18620628	18672040
Pip4k2a	ENSMUSG00000026737	2	18763882	18919753
4930426L09Rik	ENSMUSG00000026736	2	18919970	18921428
Armc3	ENSMUSG00000037683	2	19120745	19231868
Msrb2	ENSMUSG00000023094	2	19293067	19316603
Ptf1a	ENSMUSG00000026735	2	19367290	19369128
4921504E06Rik	ENSMUSG00000026734	2	19384464	19475541
Gm13324	ENSMUSG00000085100	2	17480687	17481625
Gm13323	ENSMUSG00000081851	2	17718461	17719611
Gm13329	ENSMUSG00000081116	2	17919868	17920132
Gm13330	ENSMUSG00000085319	2	17954160	17961260
1810059C17Rik	ENSMUSG00000086340	2	17975820	17978240
Gm13351	ENSMUSG00000081619	2	18100656	18101069
Gm13350	ENSMUSG00000083070	2	18170992	18171470
Gm13349	ENSMUSG00000082520	2	18260206	18260616
Gm13354	ENSMUSG00000082742	2	18415996	18416164
Gm13353	ENSMUSG00000081181	2	18489753	18489825
Gm13355	ENSMUSG00000082943	2	18563413	18563729
Gm13352	ENSMUSG00000086882	2	18570712	18570973
Gm20539	ENSMUSG00000092353	2	18664342	18682489
Gm13333	ENSMUSG00000081139	2	18680611	18681391
Gm13332	ENSMUSG00000083281	2	19023328	19024725
4930447M23Rik	ENSMUSG00000087674	2	19265944	19272677
Gm13344	ENSMUSG00000087103	2	19350731	19353610
Gm13336	ENSMUSG00000085388	2	19363135	19368301
1810010K12Rik	ENSMUSG00000056329	2	19373455	19376622
AL928557.1	ENSMUSG00000092814	2	18051079	18051204
U6	ENSMUSG00000064964	2	18080314	18080418
Gm13345	ENSMUSG00000084160	2	19430717	19430944
Fign	ENSMUSG00000075324	2	63809564	63936095
Grb14	ENSMUSG00000026888	2	64750533	64863044
Cobll1	ENSMUSG00000034903	2	64926396	65077460
Slc38a11	ENSMUSG00000061171	2	65154487	65202091
Scn3a	ENSMUSG00000057182	2	65295175	65405684
Scn2a1	ENSMUSG00000075318	2	65458914	65605504
Csrnp3	ENSMUSG00000044647	2	65683824	65869603
Gm13575	ENSMUSG00000087702	2	64220659	64231917
Gm13577	ENSMUSG00000082127	2	64312802	64313014
Gm13576	ENSMUSG00000081065	2	64407920	64408697
Gm13578	ENSMUSG00000084104	2	64706056	64706645
Gm13594	ENSMUSG00000086881	2	65076813	65077732
Gm13592	ENSMUSG00000083707	2	65115474	65116483
Gm13593	ENSMUSG00000080766	2	65134235	65135426
Gm13595	ENSMUSG00000086701	2	65347322	65350662
Gm13619	ENSMUSG00000052865	2	65690465	65698676
SNORA17	ENSMUSG00000088197	2	65214226	65214339
Gm13617	ENSMUSG00000085160	2	65782356	65792127
Galnt3	ENSMUSG00000026994	2	65920823	65963051
SNORD26	ENSMUSG00000088306	2	65966189	65966268
Gm13616	ENSMUSG00000080728	2	65983711	65983932
Ttc21b	ENSMUSG00000034848	2	66022384	66094674
Scn1a	ENSMUSG00000064329	2	66108838	66278897
Scn9a	ENSMUSG00000075316	2	66318137	66473009
Gm13618	ENSMUSG00000086671	2	66025893	66030870
Gm13630	ENSMUSG00000085386	2	66247551	66259645
Gm13629	ENSMUSG00000087301	2	66278937	66384083
Rpl35-ps1	ENSMUSG00000080855	2	66285093	66285464
Gm13627	ENSMUSG00000081307	2	66367471	66368803
7SK	ENSMUSG00000088994	2	66440572	66440855
Scn7a	ENSMUSG00000034810	2	66511482	66622971
Cd82	ENSMUSG00000027215	2	93259268	93303297
Gm10803	ENSMUSG00000075024	2	93400725	93404518
Alx4	ENSMUSG00000040310	2	93482541	93521496
Ext2	ENSMUSG00000027198	2	93535788	93662725
Accs	ENSMUSG00000040272	2	93673624	93690100
Accsl	ENSMUSG00000075023	2	93695518	93709314
Alkbh3	ENSMUSG00000040174	2	93820707	93850964
Hsd17b12	ENSMUSG00000027195	2	93872846	93998121
Ttc17	ENSMUSG00000027194	2	94140924	94246846
Api5	ENSMUSG00000027193	2	94251839	94278293
Gm13807	ENSMUSG00000085852	2	93243704	93257987
Gm10804	ENSMUSG00000075025	2	93292976	93310028
Gm13818	ENSMUSG00000081353	2	93634727	93635241
Gm1335	ENSMUSG00000083009	2	93780456	93781035
Gm13889	ENSMUSG00000087006	2	93795967	93797684
Gm13889	ENSMUSG00000075021	2	93796536	93797284
4921507L20Rik	ENSMUSG00000027196	2	93820191	93823732
E530001K10Rik	ENSMUSG00000075020	2	94092036	94104915
Itpa-ps1	ENSMUSG00000081476	2	94224659	94225255
2810002D19Rik	ENSMUSG00000045464	2	94246308	94251839
Gm13788	ENSMUSG00000083204	2	94430978	94431578
Gm13793	ENSMUSG00000087069	2	94569171	94570895
Gm13795	ENSMUSG00000080739	2	95164847	95165141
AL683878.1	ENSMUSG00000093033	2	94024184	94024287
AL732472.1	ENSMUSG00000078012	2	93738199	93738290
5S_rRNA	ENSMUSG00000089073	2	93226884	93226986
SNORA17	ENSMUSG00000077678	2	94462115	94462245
Mir129-2	ENSMUSG00000065511	2	94081521	94081610
SNORA17	ENSMUSG00000077281	2	94632362	94632493
Mir670	ENSMUSG00000076335	2	94101457	94101556
Gm13794	ENSMUSG00000084906	2	95234399	95237808
Gm13796	ENSMUSG00000083739	2	95515934	95516246
Gm13798	ENSMUSG00000081757	2	95517874	95518012
Gm13797	ENSMUSG00000083846	2	95538074	95538193
Nphp1	ENSMUSG00000027378	2	127566468	127614633
Mrps5	ENSMUSG00000027374	2	127412958	127432565
Bub1	ENSMUSG00000027379	2	127626858	127657601
Dusp2	ENSMUSG00000027368	2	127161895	127164112
Astl	ENSMUSG00000050468	2	127164375	127183387
Fahd2a	ENSMUSG00000027371	2	127261951	127270301
Kcnip3	ENSMUSG00000079056	2	127282234	127347830
Gm17601	ENSMUSG00000090815	2	127343028	127343545
Prom2	ENSMUSG00000027376	2	127352209	127367203
Zc3h8	ENSMUSG00000027387	2	128752004	128769813
Gm10762	ENSMUSG00000074807	2	128792329	128793461
Zc3h6	ENSMUSG00000042851	2	128793138	128844299
Gm14025	ENSMUSG00000079051	2	128863881	128873908
Ttl	ENSMUSG00000027394	2	128891678	128922019
Polr1b	ENSMUSG00000027395	2	128926731	128952330
Chchd5	ENSMUSG00000037938	2	128955436	128959870
Gm14229	ENSMUSG00000083648	2	127394313	127395162
Gm14245	ENSMUSG00000084006	2	127514141	127515983
Gm14244	ENSMUSG00000087162	2	127517635	127526224
1500011K16Rik	ENSMUSG00000051319	2	127617124	127618224
Gm14009	ENSMUSG00000085750	2	128015723	128030370
Gm14005	ENSMUSG00000074813	2	128021729	128255085
Gm14012	ENSMUSG00000086879	2	128063429	128065379
Gm14010	ENSMUSG00000079053	2	128249390	128250301
Gm14006	ENSMUSG00000082671	2	128382990	128383942
Gm14008	ENSMUSG00000082350	2	128413631	128413904
Gm14007	ENSMUSG00000080789	2	128432721	128432930
Gm14011	ENSMUSG00000085036	2	128577007	128579441
Gm14028	ENSMUSG00000082339	2	128778708	128779186
4933427J07Rik	ENSMUSG00000087267	2	128781407	128783597
Gm14027	ENSMUSG00000090248	2	128842688	128847492
Gm14022	ENSMUSG00000087151	2	128886682	128891422
Gm10766	ENSMUSG00000074822	2	127095445	127095768
Stard7	ENSMUSG00000027367	2	127095954	127124670
Mertk	ENSMUSG00000014361	2	128524692	128628630
Tmem87b	ENSMUSG00000014353	2	128643854	128679997
Fbln7	ENSMUSG00000027386	2	128688717	128722770
Acoxl	ENSMUSG00000027380	2	127664612	127949609
Bcl2l11	ENSMUSG00000027381	2	127951774	127988283
Gm355	ENSMUSG00000074812	2	128416945	128424200
Anapc1	ENSMUSG00000014355	2	128435840	128513127
Tmem127	ENSMUSG00000034850	2	127073644	127086843
Mal	ENSMUSG00000027375	2	127458962	127482431
Mall	ENSMUSG00000027377	2	127530122	127555668
Adra2b	ENSMUSG00000058620	2	127188944	127192957
Gpat2	ENSMUSG00000046338	2	127250935	127261828
1810024B03Rik	ENSMUSG00000044145	2	127012091	127034016
Snrnp200	ENSMUSG00000003660	2	127034122	127066187
Ciao1	ENSMUSG00000003662	2	127066674	127073552
Zfp661	ENSMUSG00000034800	2	127400398	127412830
AL844481.1	ENSMUSG00000093203	2	127717724	127717849
SNORA55	ENSMUSG00000089264	2	127503406	127503463
SNORA25	ENSMUSG00000087785	2	128606112	128606235
7SK	ENSMUSG00000084628	2	127298753	127299044
U1	ENSMUSG00000088175	2	127915660	127915796
AL833780.1	ENSMUSG00000092719	2	128751307	128751428
AI847159	ENSMUSG00000084826	2	128984402	129006403
Gm14026	ENSMUSG00000082274	2	128994436	128996224
Gm14029	ENSMUSG00000086652	2	129008218	129009683
Slc20a1	ENSMUSG00000027397	2	129024500	129037352
9830144P21Rik	ENSMUSG00000087528	2	129031694	129056315
Ckap2l	ENSMUSG00000048327	2	129093946	129122948
Il1a	ENSMUSG00000027399	2	129125346	129135708
Il1b	ENSMUSG00000027398	2	129190306	129196875
F830045P16Rik	ENSMUSG00000043727	2	129284095	129362338
Sirpa	ENSMUSG00000037902	2	129418571	129457964
Pdyn	ENSMUSG00000027400	2	129512301	129525580
Stk35	ENSMUSG00000037885	2	129626253	129658023
A730036I17Rik	ENSMUSG00000056738	2	129044705	129061340
Gm14024	ENSMUSG00000085485	2	129072112	129094262
Gm14023	ENSMUSG00000085498	2	129123106	129133562
Gm14039	ENSMUSG00000082097	2	129188495	129188595
Gm14047	ENSMUSG00000074805	2	129195633	129201484
Gm14045	ENSMUSG00000081888	2	129204007	129205132
Gm14040	ENSMUSG00000086637	2	129319306	129341543
Gm14041	ENSMUSG00000087015	2	129390783	129391804
Gm14046	ENSMUSG00000084328	2	129575637	129576145
Gm14043	ENSMUSG00000083589	2	129599432	129599659
U12	ENSMUSG00000065057	2	129141065	129141215
Tgm3	ENSMUSG00000027401	2	129838085	129876135
SNORA17	ENSMUSG00000089152	2	129897460	129897546
SNORA17	ENSMUSG00000077348	2	129911777	129911905
AU015228	ENSMUSG00000074804	2	129926130	129929111
Tgm6	ENSMUSG00000027403	2	129938152	129979968
Snrpb	ENSMUSG00000027404	2	129997150	130005139
Tmc2	ENSMUSG00000060332	2	130020930	130090181
Rassf2	ENSMUSG00000027339	2	131815151	131855994
Prnd	ENSMUSG00000027338	2	131735693	131781866
Ptpra	ENSMUSG00000027303	2	130276014	130380036
Fam113a	ENSMUSG00000037773	2	130242983	130250437
4933425O20Rik	ENSMUSG00000049692	2	130232214	130233635
Mrps26	ENSMUSG00000037740	2	130389478	130394431
Oxt	ENSMUSG00000027301	2	130401909	130402790
Avp	ENSMUSG00000037727	2	130406356	130408290
Ubox5	ENSMUSG00000027300	2	130415738	130455774
Fastkd5	ENSMUSG00000079043	2	130439576	130455763
Prosapip1	ENSMUSG00000037703	2	130458575	130468539
Ddrgk1	ENSMUSG00000068290	2	130479696	130490395
Itpa	ENSMUSG00000074797	2	130493346	130507350
Slc4a11	ENSMUSG00000074796	2	130509849	130523255
Vps16	ENSMUSG00000027411	2	130250075	130270005
Atrn	ENSMUSG00000027312	2	130732231	130856069
4930402H24Rik	ENSMUSG00000027309	2	130531936	130732142
Adra1d	ENSMUSG00000027335	2	131371586	131388021
4930425F17Rik	ENSMUSG00000062501	2	131473561	131474330
Erv3	ENSMUSG00000037482	2	131679414	131685483
Prnp	ENSMUSG00000079037	2	131735664	131764165
Gfra4	ENSMUSG00000027316	2	130865368	130868824
Adam33	ENSMUSG00000027318	2	130876327	130889550
Nop56	ENSMUSG00000027405	2	130100166	130105049
Idh3b	ENSMUSG00000027406	2	130105045	130110283
5730494N06Rik	ENSMUSG00000027341	2	132065228	132073543
Gm14044	ENSMUSG00000083483	2	130210581	130211086
Gm14042	ENSMUSG00000082985	2	130226173	130227005
4930473A02Rik	ENSMUSG00000060029	2	130369527	130389485
Gm14057	ENSMUSG00000089662	2	130629237	130629718
A730017L22Rik	ENSMUSG00000085566	2	130698795	130732132
Gm14048	ENSMUSG00000080989	2	130706602	130707869
Gm14049	ENSMUSG00000083953	2	130813720	130814355
Gm14232	ENSMUSG00000087405	2	130985273	130997078
Gm14233	ENSMUSG00000086329	2	131124281	131125571
Gm14284	ENSMUSG00000082044	2	131147824	131148102
Gm14283	ENSMUSG00000081652	2	131240657	131240981
Gm14304	ENSMUSG00000083671	2	131279864	131280376
Gm14285	ENSMUSG00000087524	2	131387350	131388915
Gm14280	ENSMUSG00000086831	2	131478633	131547574
5330413P13Rik	ENSMUSG00000086822	2	131645742	131673396
Gm14282	ENSMUSG00000081422	2	131671092	131671331
Gm14281	ENSMUSG00000083469	2	131672131	131673424
Lamr1-ps1	ENSMUSG00000081229	2	131729822	131730695
Gm14052	ENSMUSG00000082990	2	131925605	131926635
Gm14051	ENSMUSG00000086756	2	131970269	132045986
Ebf4	ENSMUSG00000053552	2	130120905	130196217
1700020A23Rik	ENSMUSG00000027409	2	130230995	130231810
Cpxm1	ENSMUSG00000027408	2	130216511	130223310
Slc23a2	ENSMUSG00000027340	2	131878232	131970844
Siglec1	ENSMUSG00000027322	2	130894956	130912501
Hspa12b	ENSMUSG00000074793	2	130953016	130972057
Gm11037	ENSMUSG00000079039	2	130959233	130959951
1700037H04Rik	ENSMUSG00000027327	2	130972060	130985817
Spef1	ENSMUSG00000027329	2	130995997	131013018
Cenpb	ENSMUSG00000068267	2	131000918	131005803
Cdc25b	ENSMUSG00000027330	2	131012685	131024233
2310035K24Rik	ENSMUSG00000068264	2	131032814	131039250
Mavs	ENSMUSG00000037523	2	131059799	131073761
Pank2	ENSMUSG00000037514	2	131088231	131124924
Rnf24	ENSMUSG00000048911	2	131123800	131178628
Smox	ENSMUSG00000027333	2	131317232	131351658
Snord57	ENSMUSG00000065272	2	130103752	130103823
AL731707.1	ENSMUSG00000077004	2	130357414	130357480
7SK	ENSMUSG00000084694	2	130531064	130531432
RNaseP_nuc	ENSMUSG00000089113	2	131239397	131239698
AL831731.1	ENSMUSG00000092654	2	131393747	131393818
AL833804.1	ENSMUSG00000093645	2	130102931	130103016
Snord110	ENSMUSG00000080610	2	130101242	130101309
Mir103-2	ENSMUSG00000065563	2	131113788	131113873
SNORA51	ENSMUSG00000065287	2	130101973	130102105
SNORD56	ENSMUSG00000065289	2	130103433	130103502
Pcna	ENSMUSG00000027342	2	132074898	132079050
Prokr2	ENSMUSG00000050558	2	132163469	132211183
AV099323	ENSMUSG00000087377	2	132079093	132087069
4921508D12Rik	ENSMUSG00000027345	2	132250477	132278235
Gm14095	ENSMUSG00000086250	2	132308948	132326884
1700026D11Rik	ENSMUSG00000086379	2	132316370	132349793
Cds2	ENSMUSG00000058793	2	132088884	132137786
Gpcpd1	ENSMUSG00000027346	2	132354818	132413465
AU019990	ENSMUSG00000074783	2	132423931	132478804
1110034G24Rik	ENSMUSG00000044991	2	132512667	132576791
Rpl23a-ps4	ENSMUSG00000081445	2	132487978	132488432
Gm14099	ENSMUSG00000084089	2	132499121	132499725
Gm14098	ENSMUSG00000081662	2	132504005	132504975
Gm14097	ENSMUSG00000084839	2	132520168	132524259
U6	ENSMUSG00000064413	2	132542842	132542944
Gm14078	ENSMUSG00000081731	2	140781501	140781985
Gm14080	ENSMUSG00000083274	2	140953016	140953801
Gm14105	ENSMUSG00000074763	2	141055406	141061162
Gm14077	ENSMUSG00000086450	2	141056167	141112727
Fau-ps1	ENSMUSG00000082412	2	141664525	141665075
Macrod2	ENSMUSG00000068205	2	140221045	142218702
Flrt3	ENSMUSG00000051379	2	140476650	140497205
Flrt3	ENSMUSG00000079021	2	140476652	140497186
U6	ENSMUSG00000065347	2	141466226	141466332
7SK	ENSMUSG00000089318	2	142207724	142208027
C630020P19Rik	ENSMUSG00000086171	2	143361212	143373573
Gm11644	ENSMUSG00000083787	2	143175248	143175397
Rpl26-ps5	ENSMUSG00000081125	2	142396244	142396702
Gm14081	ENSMUSG00000083215	2	142402664	142403593
4930511F01Rik	ENSMUSG00000086504	2	142728701	142729308
Gm14083	ENSMUSG00000082903	2	142955456	142956075
Gm14082	ENSMUSG00000083047	2	142976566	142977366
Gm11645	ENSMUSG00000080895	2	143332147	143332795
Kif16b	ENSMUSG00000038844	2	142443210	142727267
Snrpb2	ENSMUSG00000008333	2	142888775	142898589
Otor	ENSMUSG00000027416	2	142904209	142907449
Pcsk2	ENSMUSG00000027419	2	143371892	143642021
SNORA17	ENSMUSG00000088134	2	142612632	142612747
Gm12360	ENSMUSG00000087115	2	143573319	143621701
Bfsp1	ENSMUSG00000027420	2	143652264	143688909
Dstn	ENSMUSG00000015932	2	143741056	143769060
Gm11654	ENSMUSG00000082987	2	143681385	143681812
Gm11673	ENSMUSG00000081293	2	143703685	143704015
Gm11686	ENSMUSG00000080711	2	143706913	143707245
Rrbp1	ENSMUSG00000027422	2	143773131	143836999
Rbl1	ENSMUSG00000027641	2	156971629	157030270
4922505G16Rik	ENSMUSG00000074627	2	157034286	157105285
Rpn2	ENSMUSG00000027642	2	157104753	157152055
Ghrh	ENSMUSG00000027643	2	157155233	157173242
Manbal	ENSMUSG00000063019	2	157193330	157222499
Src	ENSMUSG00000027646	2	157244180	157297598
Blcap	ENSMUSG00000067787	2	157382098	157397010
Nnat	ENSMUSG00000067786	2	157385814	157388258
Ctnnbl1	ENSMUSG00000027649	2	157563137	157717350
Vstm2l	ENSMUSG00000037843	2	157740389	157770455
Tti1	ENSMUSG00000027650	2	157807539	157854169
Rprd1b	ENSMUSG00000027651	2	157854233	157958033
Tgm2	ENSMUSG00000037820	2	157942138	157972172
D630003M21Rik	ENSMUSG00000037813	2	158008269	158054958
1700060C20Rik	ENSMUSG00000078957	2	158017745	158021478
Bpi	ENSMUSG00000052922	2	158083830	158110267
Lbp	ENSMUSG00000016024	2	158132229	158158588
Snhg11	ENSMUSG00000044349	2	158201374	158211881
Ralgapb	ENSMUSG00000027652	2	158235584	158324989
Adig	ENSMUSG00000044405	2	158328348	158333934
Arhgap40	ENSMUSG00000074625	2	158338532	158376498
Slc32a1	ENSMUSG00000037771	2	158436494	158441484
Actr5	ENSMUSG00000037761	2	158450624	158464947
Ppp1r16b	ENSMUSG00000037754	2	158491134	158592070
Fam83d	ENSMUSG00000027654	2	158593829	158612373
Dhx35	ENSMUSG00000027655	2	158620543	158683950
Gm14277	ENSMUSG00000084113	2	156994556	156994915
Gm14279	ENSMUSG00000081740	2	157347432	157347764
Gm14287	ENSMUSG00000082329	2	157354605	157354721
Gm14286	ENSMUSG00000087445	2	157370002	157371205
2410019O14Rik	ENSMUSG00000087547	2	157421319	157423056
Gm14176	ENSMUSG00000062846	2	157727272	157727748
Gm20412	ENSMUSG00000092283	2	157942890	157943641
9430008C03Rik	ENSMUSG00000085385	2	158181043	158187316
Gm14201	ENSMUSG00000083168	2	158228463	158228751
Gm14202	ENSMUSG00000083715	2	158232244	158232554
Gm14200	ENSMUSG00000081800	2	158293685	158294133
Gm14204	ENSMUSG00000086496	2	158421208	158436459
Gm14205	ENSMUSG00000087563	2	158436646	158437556
AL672259.1	ENSMUSG00000077990	2	157388097	157388183
Mir3474	ENSMUSG00000093120	2	158464319	158464376
Y_RNA	ENSMUSG00000084644	2	158313338	158313423
SNORA71	ENSMUSG00000064995	2	158184096	158184208
SNORA71	ENSMUSG00000064405	2	158185534	158185665
SNORA71	ENSMUSG00000065362	2	158182160	158182290
SNORA71	ENSMUSG00000065840	2	158203958	158204090
SNORA17	ENSMUSG00000077188	2	158965097	158965228
SNORA71	ENSMUSG00000064585	2	158205270	158205402
SNORA17	ENSMUSG00000077290	2	157539404	157539537
AL663077.1	ENSMUSG00000093040	2	158565874	158565999
U6	ENSMUSG00000084417	2	157551736	157551834
4930591A17Rik	ENSMUSG00000039138	2	179149641	179151587
Cdh4	ENSMUSG00000000305	2	179177136	179634078
Gm10711	ENSMUSG00000074518	2	179628614	179629398
Taf4a	ENSMUSG00000039117	2	179646851	179711351
Lsm14b	ENSMUSG00000039108	2	179759692	179770170
Psma7	ENSMUSG00000027566	2	179771078	179777138
Ss18l1	ENSMUSG00000039086	2	179777214	179804906
Gtpbp5	ENSMUSG00000039069	2	179805293	179820607
Hrh3	ENSMUSG00000039059	2	179834170	179839193
Osbpl2	ENSMUSG00000039050	2	179854011	179897385
Adrm1	ENSMUSG00000039041	2	179906190	179910991
Lama5	ENSMUSG00000015647	2	179911078	179960564
Rps21	ENSMUSG00000039001	2	179992082	179993150
Cables2	ENSMUSG00000038990	2	179993245	180008201
BC066135	ENSMUSG00000038980	2	180012351	180024584
Gata5	ENSMUSG00000015627	2	180059838	180069404
Gm14318	ENSMUSG00000056061	2	180067562	180075437
Slco4a1	ENSMUSG00000038963	2	180190950	180209572
Ntsr1	ENSMUSG00000027568	2	180234681	180279685
1600027N09Rik	ENSMUSG00000027569	2	180316009	180321009
Ogfr	ENSMUSG00000049401	2	180323950	180330541
Col9a3	ENSMUSG00000027570	2	180332495	180356894
Tcfl5	ENSMUSG00000038932	2	180356661	180377413
Dido1	ENSMUSG00000038914	2	180392669	180444704
2310003C23Rik	ENSMUSG00000027573	2	180444822	180453438
Gm14314	ENSMUSG00000082215	2	178754824	178755838
Gm14292	ENSMUSG00000061897	2	178912130	178912585
Gm14293	ENSMUSG00000081481	2	178975195	178975771
Gm14294	ENSMUSG00000081882	2	179098998	179099748
Gm14300	ENSMUSG00000083410	2	179347327	179348272
4921531C22Rik	ENSMUSG00000085704	2	179710698	179713718
Gm14299	ENSMUSG00000082850	2	179727893	179728289
Gm17180	ENSMUSG00000090589	2	179834618	179836207
B230312C02Rik	ENSMUSG00000084843	2	180105196	180120590
Mir3091	ENSMUSG00000092827	2	179992241	179992316
AL663067.1	ENSMUSG00000080507	2	179725502	179725587
U6	ENSMUSG00000064422	2	180432768	180432874
Mir133a-2	ENSMUSG00000065460	2	180133084	180133187
Mir1a-1	ENSMUSG00000070144	2	180123753	180123829
Slc17a9	ENSMUSG00000023393	2	180459968	180476985
Bhlhe23	ENSMUSG00000045493	2	180509086	180511605
Ythdf1	ENSMUSG00000038848	2	180639082	180655654
Birc7	ENSMUSG00000038840	2	180663728	180668715
Nkain4	ENSMUSG00000027574	2	180669477	180689404
Arfgap1	ENSMUSG00000027575	2	180701930	180717231
9230112E08Rik	ENSMUSG00000070461	2	180718937	180720296
Col20a1	ENSMUSG00000016356	2	180721240	180752245
Chrna4	ENSMUSG00000027577	2	180753085	180778251
Kcnq2	ENSMUSG00000016346	2	180810284	180869996
Eef1a2	ENSMUSG00000016349	2	180882358	180891719
Gm14343	ENSMUSG00000087550	2	180500919	180510108
Gm14340	ENSMUSG00000074507	2	180553048	180559335
Gm14342	ENSMUSG00000086166	2	180564195	180624365
Gm14344	ENSMUSG00000085428	2	180571186	180583619
Gm14339	ENSMUSG00000085728	2	180582357	180583751
Gm14341	ENSMUSG00000087293	2	180689169	180701517
Mir124a-3	ENSMUSG00000065454	2	180628736	180628822
HAR1F	ENSMUSG00000088334	2	180572532	180572663
1700112D23Rik	ENSMUSG00000091329	3	28601589	28680030
Tmem212	ENSMUSG00000043164	3	27764988	27795290
Pld1	ENSMUSG00000027695	3	27837602	28032284
Tnik	ENSMUSG00000027692	3	28162136	28574780
Slc2a2	ENSMUSG00000027690	3	28596825	28627278
Gm6505	ENSMUSG00000070522	3	28662453	28664314
Eif5a2	ENSMUSG00000050192	3	28680233	28697768
Gm17485	ENSMUSG00000090783	3	28694778	28701145
Rpl22l1	ENSMUSG00000039221	3	28704358	28706274
Gm1527	ENSMUSG00000074655	3	28791539	28825646
Egfem1	ENSMUSG00000063600	3	28980945	29590126
Mir551b	ENSMUSG00000076120	3	29315745	29315842
AC122490.1	ENSMUSG00000080638	3	28644523	28644604
SNORA81	ENSMUSG00000088772	3	27767035	27767195
Mir446q	ENSMUSG00000092990	3	28318865	28318940
Gm16722	ENSMUSG00000085702	3	29911301	29952107
Mecom	ENSMUSG00000027684	3	29850221	30446930
Gm10258	ENSMUSG00000069074	3	30166747	30168869
Gm15952	ENSMUSG00000085655	3	35831967	35841639
A330050B17Rik	ENSMUSG00000086392	3	35898755	35924028
Gm11548	ENSMUSG00000085320	3	36398726	36405731
Gm11549	ENSMUSG00000085007	3	36413979	36420735
Gm11550	ENSMUSG00000083388	3	36438305	36439003
Gm12377	ENSMUSG00000082548	3	36593724	36593975
Dcun1d1	ENSMUSG00000027708	3	35791900	35836367
Atp11b	ENSMUSG00000037400	3	35653056	35755196
Mccc1	ENSMUSG00000027709	3	35858234	35899600
Ccdc144b	ENSMUSG00000047696	3	35906169	35952469
Acad9	ENSMUSG00000027710	3	35964901	35993866
D3Ertd254e	ENSMUSG00000033883	3	36058444	36065142
Qrfpr	ENSMUSG00000058400	3	36078346	36121197
Anxa5	ENSMUSG00000027712	3	36347847	36374765
1810062G17Rik	ENSMUSG00000027713	3	36375057	36380898
Exosc9	ENSMUSG00000027714	3	36451528	36464651
Ccna2	ENSMUSG00000027715	3	36463788	36471072
Bbs7	ENSMUSG00000037325	3	36472064	36512399
Trpc3	ENSMUSG00000027716	3	36519404	36589089
AC158547.1	ENSMUSG00000093499	3	35224536	35224627
U6	ENSMUSG00000064834	3	35634295	35634399
Gm12376	ENSMUSG00000084027	3	36723274	36723880
4932438A13Rik	ENSMUSG00000037270	3	36762028	36951955
Gm12531	ENSMUSG00000086090	3	36951137	36958957
Adad1	ENSMUSG00000027719	3	36962449	37020846
Gm12582	ENSMUSG00000081705	3	36976577	36977273
Gm12583	ENSMUSG00000082878	3	37007096	37007948
Gm12584	ENSMUSG00000083857	3	37015656	37016760
Gm12532	ENSMUSG00000084754	3	37081807	37087515
Gm13621	ENSMUSG00000081634	3	37098901	37099901
Gm12533	ENSMUSG00000083575	3	37114762	37114899
Gm12534	ENSMUSG00000086517	3	37130255	37131391
Gm12540	ENSMUSG00000083353	3	37225994	37226312
Gm12541	ENSMUSG00000054779	3	37234254	37248662
Il2	ENSMUSG00000027720	3	37019445	37024881
Il21	ENSMUSG00000027718	3	37121681	37131540
Cetn4	ENSMUSG00000045031	3	37206671	37211630
Fgf2	ENSMUSG00000037225	3	37211441	37304299
Bbs12	ENSMUSG00000051444	3	37211476	37220375
AL691478.1	ENSMUSG00000076974	3	37155706	37155815
Gm12563	ENSMUSG00000083696	3	37380414	37380515
Nudt6	ENSMUSG00000050174	3	37303832	37319133
Spata5	ENSMUSG00000027722	3	37318818	37478018
Gm12564	ENSMUSG00000080723	3	37455105	37455425
Gm12565	ENSMUSG00000081093	3	37498346	37498994
Arhgef26	ENSMUSG00000036885	3	62142266	62266143
Dhx36	ENSMUSG00000027770	3	62273961	62310926
Gpr149	ENSMUSG00000043441	3	62332999	62409062
Mme	ENSMUSG00000027820	3	63099794	63186153
SCARNA14	ENSMUSG00000089175	3	62956139	62956280
Plch1	ENSMUSG00000036834	3	63500156	63703394
U6	ENSMUSG00000088360	3	63574134	63574231
U6	ENSMUSG00000088957	3	63292915	63293020
Gm16162	ENSMUSG00000090131	3	63629716	63630366
Vmn2r1	ENSMUSG00000027824	3	63885564	63909380
Vmn2r2	ENSMUSG00000043897	3	63920354	63944465
Vmn2r3	ENSMUSG00000091572	3	64062883	64091417
Vmn2r4	ENSMUSG00000092049	3	64192543	64219218
Vmn2r5	ENSMUSG00000068999	3	64294743	64313657
Vmn2r6	ENSMUSG00000090581	3	64341483	64369220
Gm16129	ENSMUSG00000085290	3	63647038	63647991
Gm9479	ENSMUSG00000090303	3	63856953	63859532
Gm5139	ENSMUSG00000093447	3	63967312	63967560
Gm18294	ENSMUSG00000093416	3	63999496	64017599
Vmn2r-ps4	ENSMUSG00000093503	3	64132582	64136775
Vmn2r-ps5	ENSMUSG00000091967	3	64143487	64161646
Vmn2r-ps6	ENSMUSG00000093395	3	64240805	64242209
Vmn2r-ps7	ENSMUSG00000093546	3	64246522	64247897
RP23-445D13.2	ENSMUSG00000093671	3	64251889	64264017
Vmn2r-ps8	ENSMUSG00000093375	3	64280940	64283241
Gm17548	ENSMUSG00000091540	3	63767555	63772581
E130311K13Rik	ENSMUSG00000048581	3	63718606	63733394
Gmps	ENSMUSG00000027823	3	63780028	63826501
Slc33a1	ENSMUSG00000027822	3	63737429	63768690
snoU13	ENSMUSG00000089457	3	63711633	63711734
snoU109	ENSMUSG00000088735	3	64122329	64122486
U6	ENSMUSG00000089039	3	63913557	63913659
Vmn2r7	ENSMUSG00000062200	3	64494582	64648687
Vmn2r-ps9	ENSMUSG00000093699	3	64395437	64396818
RP23-445D13.4	ENSMUSG00000093484	3	64400835	64409695
Vmn2r-ps10	ENSMUSG00000093646	3	64425616	64427917
Vmn2r-ps10	ENSMUSG00000090261	3	64427143	64427917
Vmn2r-ps11	ENSMUSG00000093434	3	64436496	64648665
AC110575.2	ENSMUSG00000093524	3	64436785	64648665
Vmn2r-ps12	ENSMUSG00000093474	3	64548671	64549567
Vmn2r-ps12	ENSMUSG00000090010	3	64548671	64549539
RP24-549B23.7	ENSMUSG00000093414	3	64574208	64574440
Vmn2r-ps13	ENSMUSG00000093767	3	64703079	64703684
SNORA17	ENSMUSG00000088824	3	64698393	64698518
Kcnab1	ENSMUSG00000027827	3	64913306	65182145
Ssr3	ENSMUSG00000027828	3	65183577	65196545
4931440P22Rik	ENSMUSG00000074580	3	65311179	65333301
Tiparp	ENSMUSG00000034640	3	65332332	65359067
Lekr1	ENSMUSG00000074579	3	65470150	65635084
Ccnl1	ENSMUSG00000027829	3	65750073	65762171
Veph1	ENSMUSG00000027831	3	65857483	66100759
Ptx3	ENSMUSG00000027832	3	66023809	66029728
Shox2	ENSMUSG00000093425	3	66775217	66785693
Shox2	ENSMUSG00000027833	3	66775649	66785693
Rsrc1	ENSMUSG00000034544	3	66785312	67162318
A730090N16Rik	ENSMUSG00000090120	3	65128698	65153351
Gm5540	ENSMUSG00000048916	3	65197259	65199106
U6	ENSMUSG00000065330	3	65575433	65575539
U6	ENSMUSG00000065245	3	66859880	66859986
U1	ENSMUSG00000064522	3	65892031	65892183
U6	ENSMUSG00000087825	3	65329623	65329715
Gm16560	ENSMUSG00000089826	3	93977002	93977405
Gm16584	ENSMUSG00000090111	3	94005132	94005320
Gm4982	ENSMUSG00000089689	3	94040624	94041721
Gm9141	ENSMUSG00000089893	3	94046386	94047392
Gm16561	ENSMUSG00000089891	3	94079155	94079346
Gm17179	ENSMUSG00000091954	3	94196893	94206770
Gm15235	ENSMUSG00000081537	3	94393388	94393581
Gm9154	ENSMUSG00000062896	3	94408330	94408706
Gm15234	ENSMUSG00000085250	3	94462883	94464037
BC021767	ENSMUSG00000085006	3	94465752	94474618
Gm15264	ENSMUSG00000081355	3	94523945	94562038
Gm15263	ENSMUSG00000084058	3	94636899	94637727
B230398E01Rik	ENSMUSG00000087660	3	94762956	94765970
A730011C13Rik	ENSMUSG00000084846	3	94798332	94801272
Gm15265	ENSMUSG00000086288	3	94802722	94808791
4930481B07Rik	ENSMUSG00000085956	3	94819547	94824060
RP24-372P19.1	ENSMUSG00000093424	3	95115298	95119049
Hmgb1-ps5	ENSMUSG00000083822	3	95334340	95334896
Rps10-ps1	ENSMUSG00000060438	3	95426200	95426720
Tars2	ENSMUSG00000028107	3	95543899	95558900
Snx27	ENSMUSG00000028136	3	94301466	94386638
Rorc	ENSMUSG00000028150	3	94176716	94202198
C2cd4d	ENSMUSG00000091648	3	94166366	94168489
Gm10696	ENSMUSG00000074424	3	93978334	93982115
1700040D17Rik	ENSMUSG00000090420	3	94213317	94216805
Gm10972	ENSMUSG00000078655	3	94447034	94447522
Cgn	ENSMUSG00000068876	3	94464507	94590414
Selenbp2	ENSMUSG00000068877	3	94497478	94508335
Pogz	ENSMUSG00000038902	3	94641489	94686248
Psmb4	ENSMUSG00000005779	3	94688015	94690883
Selenbp1	ENSMUSG00000068874	3	94736978	94748680
Rfx5	ENSMUSG00000005774	3	94757997	94765483
Lingo4	ENSMUSG00000044505	3	94202439	94208423
Tdrkh	ENSMUSG00000041912	3	94217218	94236555
Oaz3	ENSMUSG00000028141	3	94237088	94240538
Mrpl9	ENSMUSG00000028140	3	94247240	94255052
Riiad1	ENSMUSG00000028139	3	94268907	94277513
Celf3	ENSMUSG00000028137	3	94282753	94296115
Pip5k1a	ENSMUSG00000028126	3	94862452	94910852
Pi4kb	ENSMUSG00000038861	3	94778653	94810765
Zfp687	ENSMUSG00000019338	3	94810512	94819370
Psmd4	ENSMUSG00000005625	3	94836616	94846536
Mrps21	ENSMUSG00000054312	3	95666557	95675442
Vps72	ENSMUSG00000008958	3	94914944	94926973
Tmod4	ENSMUSG00000005628	3	94928398	94933131
Scnm1	ENSMUSG00000092607	3	94933641	94937934
Lysmd1	ENSMUSG00000053769	3	94938010	94943440
Tnfaip8l2	ENSMUSG00000013707	3	94943443	94946282
Sema6c	ENSMUSG00000038777	3	94964379	94977946
Gabpb2	ENSMUSG00000038766	3	94985688	95021864
Gm16740	ENSMUSG00000085137	3	95021379	95030580
Gm4349	ENSMUSG00000091761	3	95231593	95235009
Gm16884	ENSMUSG00000087673	3	95659889	95665408
C920021L13Rik	ENSMUSG00000080727	3	95675445	95693016
Gm129	ENSMUSG00000038550	3	95682426	95686174
Tuft1	ENSMUSG00000005968	3	94416679	94462794
Tdpoz5	ENSMUSG00000074427	3	93764214	93765236
Gm9125	ENSMUSG00000074426	3	93852824	93854062
Gm10697	ENSMUSG00000074425	3	93875544	93876566
Rprd2	ENSMUSG00000028106	3	95563796	95622876
Prpf3	ENSMUSG00000015748	3	95634047	95659808
Gm5286	ENSMUSG00000090268	3	94000636	94003724
Gm4778	ENSMUSG00000089696	3	94067958	94070706
Them4	ENSMUSG00000028145	3	94114011	94136462
Them5	ENSMUSG00000028148	3	94146021	94151274
Anp32e	ENSMUSG00000015749	3	95733169	95751313
Mllt11	ENSMUSG00000053192	3	95023057	95032599
Cdc42se1	ENSMUSG00000046722	3	95032654	95040331
Gm128	ENSMUSG00000068860	3	95040842	95045520
Bnipl	ENSMUSG00000028115	3	95045193	95055115
Prune	ENSMUSG00000015711	3	95057596	95085998
Fam63a	ENSMUSG00000038712	3	95085267	95100088
Fam63a	ENSMUSG00000078645	3	95085767	95088779
Anxa9	ENSMUSG00000015702	3	95100018	95111098
Gm10691	ENSMUSG00000074414	3	95111594	95119039
Lass2	ENSMUSG00000015714	3	95118714	95127510
Setdb1	ENSMUSG00000015697	3	95127447	95161124
Arnt	ENSMUSG00000015522	3	95238310	95301162
BC028528	ENSMUSG00000038543	3	95687877	95695928
Aph1a	ENSMUSG00000015750	3	95697892	95702211
Ctsk	ENSMUSG00000028111	3	95303208	95313284
Ctss	ENSMUSG00000038642	3	95330708	95360325
Hormad1	ENSMUSG00000028109	3	95363599	95391593
Golph3l	ENSMUSG00000046519	3	95392856	95423164
Ensa	ENSMUSG00000038619	3	95428902	95436024
Mcl1	ENSMUSG00000038612	3	95462643	95467099
Adamtsl4	ENSMUSG00000015850	3	95480124	95491840
Ecm1	ENSMUSG00000028108	3	95538070	95543492
Car14	ENSMUSG00000038526	3	95701691	95708614
SNORD62	ENSMUSG00000064952	3	94894547	94894631
U1	ENSMUSG00000089493	3	95600622	95600807
U6	ENSMUSG00000064590	3	94903422	94903528
U6	ENSMUSG00000087720	3	94724244	94724345
Rwdd3	ENSMUSG00000028133	3	120858318	120874613
Tmem56	ENSMUSG00000028132	3	120904679	120986016
Alg14	ENSMUSG00000039887	3	120994735	121064929
Cnn3	ENSMUSG00000053931	3	121129459	121161123
Slc44a3	ENSMUSG00000039865	3	121162447	121235262
A730020M07Rik	ENSMUSG00000044522	3	121340063	121346403
4930432M17Rik	ENSMUSG00000074248	3	121374235	121385753
F3	ENSMUSG00000028128	3	121426455	121437970
Abcd3	ENSMUSG00000028127	3	121461827	121518220
Gm17676	ENSMUSG00000091716	3	121499382	121499550
A530020G20Rik	ENSMUSG00000086471	3	121234529	121238356
AC110195.1	ENSMUSG00000093177	3	120933178	120933248
U7	ENSMUSG00000088839	3	119740789	119740846
U6	ENSMUSG00000065684	3	120020802	120020907
SNORA17	ENSMUSG00000089027	3	120312884	120313011
7SK	ENSMUSG00000084674	3	121040610	121040877
Arhgap29	ENSMUSG00000039831	3	121656147	121719595
Abca4	ENSMUSG00000028125	3	121747361	121882979
Gm16078	ENSMUSG00000084912	3	121757668	121758466
Gm4609	ENSMUSG00000078592	3	121933113	121934114
AC134918.1	ENSMUSG00000092934	3	121935453	121935554
Gclm	ENSMUSG00000028124	3	121948475	121972902
Dnttip2	ENSMUSG00000039756	3	121977332	121988187
RP23-71G16.1	ENSMUSG00000093392	3	121959646	121960137
Gm17494	ENSMUSG00000057359	3	121960009	121996465
Mir760	ENSMUSG00000076456	3	121996503	121996621
Bcar3	ENSMUSG00000028121	3	122122698	122233098
U1	ENSMUSG00000087743	3	122167645	122167800
Fnbp1l	ENSMUSG00000039735	3	122241637	122322585
Pde5a	ENSMUSG00000053965	3	122432076	122562292
Gm9364	ENSMUSG00000091611	3	122564802	122565594
4933405D12Rik	ENSMUSG00000086397	3	122567655	122627034
Fabp2	ENSMUSG00000023057	3	122597990	122602424
Gm10959	ENSMUSG00000078590	3	122615988	122622278
1810037I17Rik	ENSMUSG00000054091	3	122627280	122629111
Usp53	ENSMUSG00000039701	3	122636519	122687422
Myoz2	ENSMUSG00000028116	3	122709124	122737908
AC121540.1	ENSMUSG00000076949	3	122718177	122718286
Synpo2	ENSMUSG00000050315	3	122779437	122939067
Sec24d	ENSMUSG00000039234	3	122970414	123068553
Mettl14	ENSMUSG00000028114	3	123067563	123088908
Prss12	ENSMUSG00000027978	3	123149831	123209520
Snora24	ENSMUSG00000092730	3	123210855	123210984
U6atac	ENSMUSG00000080545	3	123094032	123094161
Ndst3	ENSMUSG00000027977	3	123229084	123393770
Arsj	ENSMUSG00000046561	3	126066745	126143292
Camk2d	ENSMUSG00000053819	3	126299220	126547972
Ank2	ENSMUSG00000032826	3	126624525	127111949
Gm4392	ENSMUSG00000078164	3	127201581	127201919
Larp7	ENSMUSG00000027968	3	127239872	127256266
4930422G04Rik	ENSMUSG00000051278	3	127256407	127320939
Neurog2	ENSMUSG00000027967	3	127336054	127338549
Alpk1	ENSMUSG00000028028	3	127373317	127483445
Tifa	ENSMUSG00000046688	3	127492790	127535053
Ap1ar	ENSMUSG00000074238	3	127510182	127540410
5730508B09Rik	ENSMUSG00000050549	3	127572606	127599241
Gm10650	ENSMUSG00000074237	3	127741612	127743579
Gm17225	ENSMUSG00000090427	3	126135801	126142187
Gm15551	ENSMUSG00000086679	3	126370247	126371950
Gm16238	ENSMUSG00000089988	3	127394853	127395440
Gm16958	ENSMUSG00000087227	3	126864223	126871206
SNORA17	ENSMUSG00000077617	3	126708287	126708418
Mir302d	ENSMUSG00000065447	3	127248542	127248607
Mir302a	ENSMUSG00000065552	3	127248414	127248482
Mir367	ENSMUSG00000065413	3	127248651	127248725
Mir302c	ENSMUSG00000065482	3	127248281	127248348
5S_rRNA	ENSMUSG00000088537	3	127434512	127434608
Mir302b	ENSMUSG00000076252	3	127248146	127248219
Bmpr1b	ENSMUSG00000052430	3	141500100	141832389
Pdlim5	ENSMUSG00000028273	3	141903568	142058630
Gbp5	ENSMUSG00000040264	3	142159864	142185308
Gbp7	ENSMUSG00000040253	3	142193302	142213047
Gbp3	ENSMUSG00000028268	3	142223016	142236173
Gbp1	ENSMUSG00000028269	3	142257811	142282143
Gbp2	ENSMUSG00000028270	3	142283566	142300972
Ccbl2	ENSMUSG00000040213	3	142364015	142407874
Gtf2b	ENSMUSG00000028271	3	142428190	142446567
Pkn2	ENSMUSG00000004591	3	142453866	142544968
Gm2574	ENSMUSG00000078162	3	142625525	142626756
Gm15540	ENSMUSG00000086561	3	142406625	142407645
9530052C20Rik	ENSMUSG00000090913	3	142545459	142557608
SNORA4	ENSMUSG00000088851	3	143337907	143338031
SNORA17	ENSMUSG00000087795	3	142458066	142458158
U6	ENSMUSG00000065130	3	142435936	142436040
Lmo4	ENSMUSG00000028266	3	143851494	143868184
Hs2st1	ENSMUSG00000040151	3	144094067	144233145
Sep15	ENSMUSG00000037072	3	144233268	144260644
Sh3glb1	ENSMUSG00000037062	3	144347972	144383287
Clca1	ENSMUSG00000056025	3	144392641	144423941
Clca2	ENSMUSG00000028262	3	144459523	144482458
Clca4	ENSMUSG00000037033	3	144485587	144512321
Gm6289	ENSMUSG00000074196	3	144542286	144558975
AI747448	ENSMUSG00000074195	3	144573885	144595493
Clca6	ENSMUSG00000068547	3	144615444	144638009
Clca3	ENSMUSG00000028255	3	144667501	144695740
Clca5	ENSMUSG00000036960	3	144733229	144762068
Odf2l	ENSMUSG00000028256	3	144781553	144816879
Col24a1	ENSMUSG00000028197	3	144955436	145214975
Gm16215	ENSMUSG00000089950	3	144510538	144510967
Gm16233	ENSMUSG00000085773	3	144610525	144617842
SNORA2	ENSMUSG00000064960	3	144249789	144249916
Rpsa-ps10	ENSMUSG00000047676	3	149735554	149736584
Eltd1	ENSMUSG00000039167	3	151100851	151208050
Ifi44	ENSMUSG00000028037	3	151393886	151412911
H28	ENSMUSG00000039146	3	151422605	151425870
Ptgfr	ENSMUSG00000028036	3	151461882	151500594
Mir3963	ENSMUSG00000092830	3	150686756	150686826
U6	ENSMUSG00000065138	3	151271307	151271413
U7	ENSMUSG00000087997	3	151589312	151589373
Epha7	ENSMUSG00000028289	4	28740281	28894649
Gm11910	ENSMUSG00000084073	4	28518803	28519721
Gm11907	ENSMUSG00000082703	4	28280933	28281939
Gm11908	ENSMUSG00000082359	4	28413262	28413608
Gm11909	ENSMUSG00000081579	4	28487098	28487856
Gm11912	ENSMUSG00000083214	4	28519726	28519989
Gm11913	ENSMUSG00000081011	4	28539476	28539892
Gm11915	ENSMUSG00000086774	4	28741447	28742226
Gm11917	ENSMUSG00000087316	4	28995229	29015961
Gm11916	ENSMUSG00000086339	4	29017755	29018812
Gm11918	ENSMUSG00000080911	4	29053096	29053274
Gm11919	ENSMUSG00000082486	4	29122670	29123390
Gm11923	ENSMUSG00000082058	4	29417306	29417813
Gm11925	ENSMUSG00000080771	4	30120797	30121331
SNORA17	ENSMUSG00000077521	4	28292466	28292594
Tmeff1	ENSMUSG00000028347	4	48598046	48676003
Murc	ENSMUSG00000028348	4	48676386	48686374
E130309F12Rik	ENSMUSG00000063446	4	49072145	49353131
Acnat2	ENSMUSG00000060317	4	49392712	49421023
Acnat1	ENSMUSG00000070985	4	49459977	49486784
Baat	ENSMUSG00000039653	4	49502294	49519429
Mrpl50	ENSMUSG00000044018	4	49525468	49533965
Zfp189	ENSMUSG00000039634	4	49534048	49544389
Aldob	ENSMUSG00000028307	4	49548867	49562418
2810432L12Rik	ENSMUSG00000039611	4	49597378	49610748
Rnf20	ENSMUSG00000028309	4	49644878	49669759
Grin3a	ENSMUSG00000039579	4	49674483	49858616
Ppp3r2	ENSMUSG00000028310	4	49691619	49694896
Gm12439	ENSMUSG00000080850	4	48688028	48688392
Gm12438	ENSMUSG00000083091	4	48758387	48758722
Gm12437	ENSMUSG00000082384	4	48820009	48820263
Gm12436	ENSMUSG00000084787	4	48911465	48976109
Gm12442	ENSMUSG00000083869	4	48985850	48986187
Gm12453	ENSMUSG00000081902	4	49355120	49355450
Rbpsuh-ps1	ENSMUSG00000081770	4	49363394	49364399
Gm12451	ENSMUSG00000082725	4	49408984	49420604
Gm12452	ENSMUSG00000081380	4	49425179	49425509
Gm12459	ENSMUSG00000083153	4	49759603	49760118
Gm12458	ENSMUSG00000081120	4	50063781	50064275
AL807771.1	ENSMUSG00000093240	4	48775723	48775834
SNORA17	ENSMUSG00000077308	4	50299618	50299749
SNORA17	ENSMUSG00000077417	4	48909371	48909495
U6	ENSMUSG00000064782	4	49302170	49302275
U6	ENSMUSG00000084479	4	49487179	49487282
Cylc2	ENSMUSG00000039555	4	51229550	51242800
Gm17527	ENSMUSG00000091678	4	51267042	51267235
Gm12460	ENSMUSG00000084116	4	51202979	51203335
Amd-ps4	ENSMUSG00000019836	4	51265897	51266899
Smc2	ENSMUSG00000028312	4	52452115	52501237
Vma21-ps	ENSMUSG00000061619	4	52509703	52510178
4930547C10Rik	ENSMUSG00000028314	4	52609146	52625302
Olfr275	ENSMUSG00000089717	4	52838271	52839230
Olfr273	ENSMUSG00000049648	4	52868386	52871338
Olfr272	ENSMUSG00000051593	4	52923705	52932044
Olfr270	ENSMUSG00000070983	4	52983495	52984439
Nipsnap3a	ENSMUSG00000015242	4	53002144	53014034
Nipsnap3b	ENSMUSG00000015247	4	53024752	53034932
Abca1	ENSMUSG00000015243	4	53043659	53172767
AI427809	ENSMUSG00000073854	4	53274765	53275419
Slc44a1	ENSMUSG00000028412	4	53453285	53635350
Gm12461	ENSMUSG00000081050	4	51905765	51907003
C630028M04Rik	ENSMUSG00000085515	4	51980966	52063982
Gm12465	ENSMUSG00000082963	4	52090040	52090339
Gm12466	ENSMUSG00000083539	4	52253775	52254394
Gm12467	ENSMUSG00000082267	4	52254584	52255328
Gm12475	ENSMUSG00000083338	4	52373695	52375083
2700081L22Rik	ENSMUSG00000085763	4	52443157	52451837
Gm12483	ENSMUSG00000084380	4	52456787	52457044
4930552N02Rik	ENSMUSG00000070984	4	52827476	52841141
Gm12482	ENSMUSG00000081975	4	52834360	52834989
Cct3-ps1	ENSMUSG00000083937	4	52913471	52915555
Olfr271-ps1	ENSMUSG00000082216	4	52948302	52949253
4930412L05Rik	ENSMUSG00000087192	4	53217938	53230729
4930522O17Rik	ENSMUSG00000086947	4	53259068	53263987
AI427809	ENSMUSG00000086712	4	53275604	53283104
Gm12495	ENSMUSG00000083735	4	53321098	53321544
Gm12496	ENSMUSG00000086267	4	53414820	53416902
1700060J05Rik	ENSMUSG00000084970	4	53575855	53577569
SNORA17	ENSMUSG00000088515	4	51668639	51668747
RNaseP_nuc	ENSMUSG00000088954	4	51812792	51813224
U1	ENSMUSG00000064923	4	51825355	51825519
Fsd1l	ENSMUSG00000054752	4	53644343	53719881
Gm10979	ENSMUSG00000078702	4	53715169	53715581
Fktn	ENSMUSG00000028414	4	53726870	53778657
Tal2	ENSMUSG00000028417	4	53792577	53801584
Tmem38b	ENSMUSG00000028420	4	53838917	53874891
Gm12470	ENSMUSG00000081516	4	53675168	53676216
Rps15a-ps8	ENSMUSG00000084403	4	53803942	53804328
Gm12468	ENSMUSG00000083985	4	53890797	53891200
SNORA17	ENSMUSG00000077418	4	53918568	53918692
7SK	ENSMUSG00000089621	4	53733774	53734072
n-R5s185	ENSMUSG00000065887	4	53873524	53873642
Gm12484	ENSMUSG00000086987	4	54164703	54176550
Gm12469	ENSMUSG00000083624	4	54248542	54248748
SNORA17	ENSMUSG00000089552	4	54016929	54017059
Zfp462	ENSMUSG00000060206	4	54957920	55096435
Rad23b	ENSMUSG00000028426	4	55362915	55405109
Tpt1-ps2	ENSMUSG00000081428	4	54577495	54578015
Gm12478	ENSMUSG00000086371	4	54659414	54702323
Gm12480	ENSMUSG00000087077	4	54664775	54668949
Gm12477	ENSMUSG00000083868	4	54682494	54683064
Gm12479	ENSMUSG00000082111	4	54866000	54867584
Gm12515	ENSMUSG00000082704	4	55129435	55129795
Gm12514	ENSMUSG00000087614	4	55144080	55292351
Gm12509	ENSMUSG00000081177	4	55175880	55176488
Gm12508	ENSMUSG00000081504	4	55267609	55268091
Gm12512	ENSMUSG00000081542	4	55294936	55295152
Gm12516	ENSMUSG00000084144	4	55405189	55405573
Gm12513	ENSMUSG00000084404	4	55421828	55422179
Gm12505	ENSMUSG00000087070	4	55423315	55431714
Gm12510	ENSMUSG00000086346	4	55463556	55478686
Gm12507	ENSMUSG00000082952	4	55521166	55521580
AL772349.1	ENSMUSG00000093183	4	54481205	54481483
SNORA17	ENSMUSG00000077635	4	55481897	55482031
7SK	ENSMUSG00000084710	4	54723496	54723784
U3	ENSMUSG00000077403	4	55312528	55312717
Klf4	ENSMUSG00000003032	4	55540013	55545347
Gm12511	ENSMUSG00000066176	4	55576137	55612168
Gm12506	ENSMUSG00000085375	4	55618021	55649773
Zfp618	ENSMUSG00000028358	4	62626607	62800742
Ambp	ENSMUSG00000028356	4	62804309	62815833
Kif12	ENSMUSG00000028357	4	62826668	62833165
Col27a1	ENSMUSG00000045672	4	62875038	62996025
Orm1	ENSMUSG00000039196	4	63005594	63009197
Orm3	ENSMUSG00000028359	4	63017196	63020545
Orm2	ENSMUSG00000061540	4	63023483	63026912
Akna	ENSMUSG00000039158	4	63028159	63064479
Whrn	ENSMUSG00000039137	4	63075944	63157025
Atp6v1g1	ENSMUSG00000039105	4	63205806	63211784
6330416G13Rik	ENSMUSG00000045917	4	63219815	63247391
1700018C11Rik	ENSMUSG00000058935	4	63268123	63283462
Tnfsf15	ENSMUSG00000050395	4	63385637	63406147
Tnfsf8	ENSMUSG00000028362	4	63492342	63522381
Tnc	ENSMUSG00000028364	4	63620819	63681760
Gm11212	ENSMUSG00000082141	4	63011445	63014880
4933437N03Rik	ENSMUSG00000086953	4	63042392	63055052
Gm11483	ENSMUSG00000083943	4	63228448	63228694
Gm11213	ENSMUSG00000084782	4	63257936	63266295
Gm11482	ENSMUSG00000086817	4	63295455	63300474
Gm11214	ENSMUSG00000081503	4	63323389	63324410
Rpl17-ps4	ENSMUSG00000084345	4	63556549	63557156
8030451A03Rik	ENSMUSG00000073821	4	63640888	63810958
Gm11216	ENSMUSG00000086755	4	63736567	63744848
Gm11217	ENSMUSG00000085032	4	63915087	63937637
Gm11218	ENSMUSG00000081941	4	64517960	64519173
Gm11219	ENSMUSG00000080805	4	64672264	64672621
U6	ENSMUSG00000077504	4	63292716	63292822
Mir455	ENSMUSG00000070102	4	62917885	62917966
SNORA17	ENSMUSG00000077214	4	64105764	64105892
U6	ENSMUSG00000065913	4	63228696	63228802
Cdk5rap2	ENSMUSG00000039298	4	69877890	70071477
Megf9	ENSMUSG00000039270	4	70088099	70196029
Gm11404	ENSMUSG00000082553	4	68952655	68956155
Gm11221	ENSMUSG00000082998	4	69353001	69353685
Gm11222	ENSMUSG00000085627	4	69514981	69515718
Gm11223	ENSMUSG00000046341	4	69586235	69587205
Gm11224	ENSMUSG00000084342	4	69615200	69616310
Gm11225	ENSMUSG00000082368	4	69708191	69709239
Gm11226	ENSMUSG00000080902	4	69909670	69910407
Gm11227	ENSMUSG00000083549	4	70733707	70734177
Gm11228	ENSMUSG00000084937	4	70736143	70792167
7SK	ENSMUSG00000088367	4	70073652	70073957
Gm11232	ENSMUSG00000066141	4	71416677	71418999
Tle1	ENSMUSG00000008305	4	71778176	71861953
Gm11229	ENSMUSG00000082017	4	70946976	70947412
Rps18-ps1	ENSMUSG00000083914	4	71031729	71032239
Gm11231	ENSMUSG00000082432	4	71339047	71340752
Gm11233	ENSMUSG00000081117	4	71529022	71530011
Gm11234	ENSMUSG00000086696	4	71641511	71660593
Gm11250	ENSMUSG00000086027	4	71829802	71830483
C630043F03Rik	ENSMUSG00000084910	4	71862382	71876386
Gm11235	ENSMUSG00000083372	4	72203700	72204032
Mpdz	ENSMUSG00000028402	4	80924404	81088719
Nfib	ENSMUSG00000008575	4	81936077	82351654
Zdhhc21	ENSMUSG00000028403	4	82444642	82505862
Cer1	ENSMUSG00000038192	4	82527655	82531052
Frem1	ENSMUSG00000059049	4	82543825	82698243
Gm11765	ENSMUSG00000081391	4	81101847	81107636
Gm11411	ENSMUSG00000083385	4	81342345	81343063
Gm11412	ENSMUSG00000087540	4	81389050	81392605
Gm12914	ENSMUSG00000087608	4	81576382	81578278
Gm11264	ENSMUSG00000087110	4	81679216	81711794
Gm5860	ENSMUSG00000085022	4	81711335	81748712
Gm11266	ENSMUSG00000087413	4	82153920	82193196
Gm11267	ENSMUSG00000084851	4	82230952	82233223
Gm11268	ENSMUSG00000084357	4	82288304	82288570
Gm11269	ENSMUSG00000086293	4	82338709	82339615
n-R5s187	ENSMUSG00000084718	4	81564417	81564527
SNORA17	ENSMUSG00000077607	4	80984178	80984308
n-R5s188	ENSMUSG00000084595	4	82085314	82085418
SNORA17	ENSMUSG00000089409	4	82724415	82724533
AL591611.1	ENSMUSG00000092661	4	81707016	81707125
Mllt3	ENSMUSG00000028496	4	87415829	87679268
BC057079	ENSMUSG00000038368	4	87740533	88056915
Ptplad2	ENSMUSG00000028497	4	88042048	88084832
Ifnb1	ENSMUSG00000048806	4	88167929	88168698
Gm12597	ENSMUSG00000073812	4	88203577	88204149
Ifna14	ENSMUSG00000089770	4	88217133	88217702
Ifna9	ENSMUSG00000078644	4	88237717	88238289
Ifna12	ENSMUSG00000073811	4	88248484	88249280
C87499	ENSMUSG00000038330	4	88273224	88280315
Ifna13	ENSMUSG00000063376	4	88289545	88290363
Gm13280	ENSMUSG00000078355	4	88321819	88322828
Ifna2	ENSMUSG00000078354	4	88328785	88329816
Ifnab	ENSMUSG00000078353	4	88336503	88337172
Klhl9	ENSMUSG00000070923	4	88364196	88368369
Gm13271	ENSMUSG00000079860	4	88400772	88401320
Gm16686	ENSMUSG00000085473	4	88401099	88401494
Gm13283	ENSMUSG00000078642	4	88405933	88417772
Gm13290	ENSMUSG00000091634	4	88419152	88420707
Gm13289	ENSMUSG00000090575	4	88422080	88423635
Gm13272	ENSMUSG00000092000	4	88425008	88426563
Ifnz	ENSMUSG00000073810	4	88428035	88429496
Gm13276	ENSMUSG00000091108	4	88430867	88432422
Gm13277	ENSMUSG00000090757	4	88433791	88435346
Gm13278	ENSMUSG00000090392	4	88436709	88438264
Gm13275	ENSMUSG00000079859	4	88440391	88440939
Gm13279	ENSMUSG00000091566	4	88442556	88444111
Gm13285	ENSMUSG00000091353	4	88445479	88447034
Gm13287	ENSMUSG00000061396	4	88448998	88449965
Gm13288	ENSMUSG00000070908	4	88451435	88454284
Ifna7	ENSMUSG00000070907	4	88462129	88462704
Ifna11	ENSMUSG00000070906	4	88465823	88466469
Ifna6	ENSMUSG00000078641	4	88473320	88473889
Ifna5	ENSMUSG00000076440	4	88481429	88481998
Ifna4	ENSMUSG00000070904	4	88487720	88488363
Ifna1	ENSMUSG00000070903	4	88495991	88496560
4930553M12Rik	ENSMUSG00000054351	4	88513786	88514283
Ifne	ENSMUSG00000045364	4	88525442	88526105
Mtap	ENSMUSG00000062937	4	88783026	88826985
Cdkn2a	ENSMUSG00000044303	4	88920377	88940557
Cdkn2b	ENSMUSG00000073802	4	88952198	88956941
Gm12604	ENSMUSG00000082443	4	87226693	87227464
Gm12631	ENSMUSG00000084809	4	87679405	87680902
Gm12646	ENSMUSG00000081530	4	87689708	87689945
Gm12645	ENSMUSG00000082597	4	87797600	87797874
Gm12652	ENSMUSG00000081818	4	87901818	87902155
Ifna-ps1	ENSMUSG00000080964	4	88224791	88226478
Mrpl48-ps	ENSMUSG00000078480	4	88245079	88245714
Gm12601	ENSMUSG00000083958	4	88258557	88259948
Gm13281	ENSMUSG00000081784	4	88294642	88295208
Gm13273	ENSMUSG00000081893	4	88342095	88342602
Gm13282	ENSMUSG00000084192	4	88353813	88354357
Gm13274	ENSMUSG00000086074	4	88384742	88390198
Gm13286	ENSMUSG00000081501	4	88403748	88404284
Gm10583	ENSMUSG00000073809	4	88404075	88404474
Gm10582	ENSMUSG00000073808	4	88407005	88407404
Gm13284	ENSMUSG00000082789	4	88409613	88417510
Gm10581	ENSMUSG00000073807	4	88417454	88417688
Gm10580	ENSMUSG00000073806	4	88420225	88420624
Gm12603	ENSMUSG00000085183	4	88696212	88730518
Gm12602	ENSMUSG00000085569	4	88746568	88774130
Gm12607	ENSMUSG00000083989	4	88807603	88808095
Gm12605	ENSMUSG00000083881	4	88862768	88863720
Gm12606	ENSMUSG00000087659	4	88881603	88919307
Gm17476	ENSMUSG00000090834	4	88430359	88440295
Gm17612	ENSMUSG00000091535	4	88442047	88446128
Mir31	ENSMUSG00000065408	4	88556461	88556566
Mir491	ENSMUSG00000070077	4	87767944	87768029
AL806517.1	ENSMUSG00000093065	4	87078176	87078240
SNORA17	ENSMUSG00000088504	4	88828885	88829024
Gm12609	ENSMUSG00000085147	4	89048648	89066571
Gm12610	ENSMUSG00000086035	4	89088539	89130178
Gm12608	ENSMUSG00000080808	4	89108908	89111335
Dmrta1	ENSMUSG00000043753	4	89346127	89361463
Zfp352	ENSMUSG00000070902	4	89885511	89892393
Gm12629	ENSMUSG00000085690	4	89852218	89856700
Gm12633	ENSMUSG00000080756	4	90026313	90028017
Gm12634	ENSMUSG00000082569	4	90035422	90036413
5830433M19Rik	ENSMUSG00000028578	4	94166772	94223487
Gm10306	ENSMUSG00000070900	4	94223237	94223769
Plaa	ENSMUSG00000028577	4	94234205	94269935
Ift74	ENSMUSG00000028576	4	94281182	94359920
Lrrc19	ENSMUSG00000049799	4	94303344	94316835
Gm17636	ENSMUSG00000091804	4	94318600	94323162
Tek	ENSMUSG00000006386	4	94405980	94541667
4930579C15Rik	ENSMUSG00000028575	4	94573958	94595534
Mysm1	ENSMUSG00000062627	4	94608731	94645791
Jun	ENSMUSG00000052684	4	94715725	94718913
Fggy	ENSMUSG00000028573	4	95224198	95593630
Hook1	ENSMUSG00000028572	4	95633931	95692104
Cyp2j13	ENSMUSG00000028571	4	95694225	95744237
Cyp2j12	ENSMUSG00000081225	4	95766009	95807843
Gm12648	ENSMUSG00000085931	4	93756267	94092279
Gm12654	ENSMUSG00000081508	4	94062349	94062935
Gm12655	ENSMUSG00000087128	4	94127622	94143871
Gm12656	ENSMUSG00000083359	4	94163723	94164299
Gm12657	ENSMUSG00000063314	4	94260341	94267001
Gm12693	ENSMUSG00000083179	4	94602312	94602794
Gm12694	ENSMUSG00000086251	4	94645894	94695235
Gm12703	ENSMUSG00000052767	4	94696654	94715061
Gm12704	ENSMUSG00000081030	4	94705853	94706316
BC042782	ENSMUSG00000087366	4	94718225	94834009
4930551L18Rik	ENSMUSG00000085377	4	94755774	94758110
Gm12708	ENSMUSG00000084918	4	94860004	94876418
Gm830	ENSMUSG00000084939	4	95131415	95154085
Gm12707	ENSMUSG00000085835	4	95150647	95154092
RP23-356F8.3	ENSMUSG00000093492	4	95228522	95228850
9530080O11Rik	ENSMUSG00000044125	4	95626406	95634346
Hspe1-ps6	ENSMUSG00000083880	4	95739115	95739397
n-R5s189	ENSMUSG00000084624	4	94729341	94729454
SNORA2	ENSMUSG00000088677	4	94154574	94154674
U1	ENSMUSG00000065745	4	95190735	95190895
7SK	ENSMUSG00000088295	4	94100915	94101175
Mir872	ENSMUSG00000077921	4	94331848	94331928
Gm12674	ENSMUSG00000080884	4	95818344	95818549
E130114P18Rik	ENSMUSG00000048747	4	97234824	97444769
Nfia	ENSMUSG00000028565	4	97439425	97868605
Tm2d1	ENSMUSG00000028563	4	98022061	98049997
Inadl	ENSMUSG00000061859	4	98062476	98386294
L1td1	ENSMUSG00000087166	4	98393425	98405171
Kank4	ENSMUSG00000035407	4	98421589	98484228
I0C0044D17Rik	ENSMUSG00000073794	4	98485166	98490531
Usp1	ENSMUSG00000028560	4	98590501	98602234
Dock7	ENSMUSG00000028556	4	98603356	98787606
Angptl3	ENSMUSG00000028553	4	98697645	98712802
Atg4c	ENSMUSG00000028550	4	98860625	98926478
Gm10305	ENSMUSG00000070892	4	98939362	98941836
Gm12689	ENSMUSG00000070891	4	98962591	98963382
Foxd3	ENSMUSG00000067261	4	99322990	99325362
Gm12676	ENSMUSG00000085710	4	97420859	97424080
Gm12691	ENSMUSG00000081096	4	97812835	97813290
Gm12692	ENSMUSG00000082388	4	97901436	97901981
Gm12787	ENSMUSG00000083644	4	97934774	97935266
0610025J13Rik	ENSMUSG00000046683	4	97988089	97998482
Gm12788	ENSMUSG00000082144	4	98019118	98019425
Gm12846	ENSMUSG00000081046	4	98331057	98332828
Gm17376	ENSMUSG00000090718	4	98412426	98412513
A730085A09Rik	ENSMUSG00000085843	4	98460459	98465591
Gm12851	ENSMUSG00000084188	4	98522305	98522725
Gm12852	ENSMUSG00000081733	4	98769751	98770469
Gm12705	ENSMUSG00000087395	4	98783105	98784992
Gm12681	ENSMUSG00000086498	4	98813605	98828333
Gm12685	ENSMUSG00000081184	4	99085189	99085402
Gm12686	ENSMUSG00000082442	4	99085464	99085860
Gm12684	ENSMUSG00000081150	4	99096947	99097945
Gm12683	ENSMUSG00000080803	4	99186743	99187157
Gm12690	ENSMUSG00000087332	4	99236191	99239702
Gm12687	ENSMUSG00000083698	4	99282508	99283213
Gm12688	ENSMUSG00000086096	4	99320298	99321674
Gm12682	ENSMUSG00000086592	4	99329232	99379663
BX005053.1	ENSMUSG00000092763	4	99324433	99324521
AL627124.1	ENSMUSG00000076294	4	98328328	98328423
Y_RNA	ENSMUSG00000064883	4	97942416	97942529
U6	ENSMUSG00000088548	4	98050093	98050182
AL671229.1	ENSMUSG00000093123	4	98224431	98224556
AL671140.1	ENSMUSG00000093135	4	98025885	98025994
Alg6	ENSMUSG00000073792	4	99382355	99430151
Itgb3bp	ENSMUSG00000028549	4	99432093	99602418
Gm10967	ENSMUSG00000078631	4	99439047	99441197
Efcab7	ENSMUSG00000073791	4	99495889	99585393
Pgm2	ENSMUSG00000025791	4	99602019	99659899
Ror1	ENSMUSG00000035305	4	99768396	100117370
Gm12702	ENSMUSG00000085142	4	99725125	99738589
Gm12701	ENSMUSG00000086385	4	99792226	99793446
U4	ENSMUSG00000084478	4	99582402	99582483
Sgip1	ENSMUSG00000028524	4	102413902	102646233
Tctex1d1	ENSMUSG00000028523	4	102658984	102678199
Insl5	ENSMUSG00000066090	4	102690477	102699447
Wdr78	ENSMUSG00000035126	4	102710670	102787160
Mier1	ENSMUSG00000028522	4	102786995	102838359
Slc35d1	ENSMUSG00000028521	4	102843254	102887769
4921539E11Rik	ENSMUSG00000028520	4	102903050	102963468
Oma1	ENSMUSG00000035069	4	102986417	103044473
Gm10963	ENSMUSG00000078617	4	103229694	103245771
Dab1	ENSMUSG00000028519	4	103291964	104417449
Gm10304	ENSMUSG00000070886	4	104000857	104003162
C8b	ENSMUSG00000029656	4	104438922	104477153
C8a	ENSMUSG00000035031	4	104488284	104549003
Gm17662	ENSMUSG00000091038	4	104529934	104531742
Gm12709	ENSMUSG00000085181	4	102639871	102662360
BB031773	ENSMUSG00000085041	4	102676711	102684570
Gm12710	ENSMUSG00000080744	4	102776132	102776347
4930456L15Rik	ENSMUSG00000078618	4	102963564	102984437
Gm12718	ENSMUSG00000086136	4	103055105	103164645
Gm12720	ENSMUSG00000087482	4	103211450	103223287
Gm12716	ENSMUSG00000081584	4	103215979	103217332
Gm12715	ENSMUSG00000059195	4	103235929	103237833
Gm12719	ENSMUSG00000080913	4	103611906	103612146
Gm12717	ENSMUSG00000081696	4	103613568	103614546
AL772393.1	ENSMUSG00000093326	4	103144464	103144564
SNORA66	ENSMUSG00000077514	4	103258877	103259005
Glis1	ENSMUSG00000034762	4	107107196	107307666
Dmrtb1	ENSMUSG00000028610	4	107348895	107356835
Lrp8	ENSMUSG00000028613	4	107474866	107549445
B230314M03Rik	ENSMUSG00000073779	4	107478638	107483553
Magoh	ENSMUSG00000028609	4	107552360	107560029
0610037L13Rik	ENSMUSG00000028608	4	107562418	107571989
Cpt2	ENSMUSG00000028607	4	107576586	107596215
Slc1a7	ENSMUSG00000008932	4	107640937	107686137
Podn	ENSMUSG00000028600	4	107687396	107704942
Scp2	ENSMUSG00000028603	4	107716444	107817603
Echdc2	ENSMUSG00000028601	4	107838042	107851913
Zyg11a	ENSMUSG00000034645	4	107854539	107890527
Zyg11b	ENSMUSG00000034636	4	107902329	107973701
2010305A19Rik	ENSMUSG00000048351	4	108000745	108014149
Fam159a	ENSMUSG00000059816	4	108040382	108055954
Gpx7	ENSMUSG00000028597	4	108072995	108079566
Zcchc11	ENSMUSG00000034610	4	108132031	108232026
Prpf38a	ENSMUSG00000063800	4	108235777	108251941
Orc1	ENSMUSG00000028587	4	108252028	108288633
Cc2d1b	ENSMUSG00000028582	4	108292545	108306728
AL626783.1	ENSMUSG00000090599	4	108295534	108297821
Zfyve9	ENSMUSG00000034557	4	108310071	108453403
Btf3l4	ENSMUSG00000028568	4	108486900	108506219
Txndc12	ENSMUSG00000028567	4	108507206	108534732
A730015C16Rik	ENSMUSG00000090551	4	108520004	108521224
Kti12	ENSMUSG00000073775	4	108520462	108522017
Rab3b	ENSMUSG00000003411	4	108551668	108615929
Nrd1	ENSMUSG00000053510	4	108673260	108734382
Ssbp3	ENSMUSG00000061887	4	106583306	106722299
Mrpl37	ENSMUSG00000028622	4	106728479	106739473
Cyb5rl	ENSMUSG00000028621	4	106739593	106760873
Cdcp2	ENSMUSG00000047636	4	106769496	106780353
2210012G02Rik	ENSMUSG00000028619	4	106806760	106851721
Tmem59	ENSMUSG00000028618	4	106851004	106873601
Ldlrad1	ENSMUSG00000070877	4	106881785	106890665
Lrrc42	ENSMUSG00000028617	4	106906119	106926137
Hspb11	ENSMUSG00000063172	4	106926198	106952543
Dio1	ENSMUSG00000034785	4	106964070	106979774
Yipf1	ENSMUSG00000057375	4	106986968	107032428
Tmem48	ENSMUSG00000028614	4	107040389	107088951
Gm12786	ENSMUSG00000085581	4	106690540	106695104
Gm12802	ENSMUSG00000085304	4	106799218	106808857
Gm12850	ENSMUSG00000082941	4	106943039	106943474
Gm12870	ENSMUSG00000082279	4	107000089	107001104
Gm12869	ENSMUSG00000086041	4	107021644	107023958
Gm12899	ENSMUSG00000081916	4	107360733	107361283
1700047F07Rik	ENSMUSG00000085549	4	107362306	107431590
Gm12906	ENSMUSG00000084874	4	107432043	107433078
Gm12907	ENSMUSG00000087195	4	107437685	107443206
4933424M12Rik	ENSMUSG00000087289	4	107460454	107462526
Gm12908	ENSMUSG00000087200	4	107465766	107474669
B230314M03Rik	ENSMUSG00000085153	4	107480593	107495615
4930430J20Rik	ENSMUSG00000028612	4	107500501	107503449
4930407G08Rik	ENSMUSG00000086713	4	107626537	107633326
Gm12742	ENSMUSG00000083957	4	107982961	107983756
Gm12740	ENSMUSG00000081734	4	107994943	107995250
Gm12738	ENSMUSG00000083255	4	108123412	108123947
Gm12739	ENSMUSG00000083783	4	108156776	108157157
Gm12737	ENSMUSG00000085093	4	108186386	108189422
Gm12743	ENSMUSG00000084968	4	108265030	108292454
Gm17354	ENSMUSG00000091985	4	108306448	108310046
Gm12741	ENSMUSG00000082374	4	108404347	108404902
Gm12736	ENSMUSG00000082699	4	108606178	108606413
8030443G20Rik	ENSMUSG00000086483	4	108615448	108644682
U6	ENSMUSG00000070174	4	108139549	108139655
U6	ENSMUSG00000065299	4	108170649	108170751
U6	ENSMUSG00000087714	4	108194529	108194635
AL626784.1	ENSMUSG00000092723	4	107107177	107107261
U6	ENSMUSG00000084593	4	108210096	108210202
U6	ENSMUSG00000089051	4	107714302	107714405
U6	ENSMUSG00000088285	4	108671207	108671311
mmu-mir-1194	ENSMUSG00000080460	4	107370439	107370559
Mir761	ENSMUSG00000076444	4	108690260	108690335
Osbpl9	ENSMUSG00000028559	4	108733750	108874877
7SK	ENSMUSG00000088014	4	108833529	108833802
Rnf220	ENSMUSG00000028677	4	116944068	117169657
Eri3	ENSMUSG00000033423	4	117222970	117346902
Dmap1	ENSMUSG00000009640	4	117347286	117354878
Klf17	ENSMUSG00000048626	4	117430441	117438253
Slc6a9	ENSMUSG00000028542	4	117507111	117547803
Ccdc24	ENSMUSG00000078588	4	117539129	117545162
B4galt2	ENSMUSG00000028541	4	117541865	117556092
Atp6v0b	ENSMUSG00000033379	4	117556931	117559938
Dph2	ENSMUSG00000028540	4	117561248	117564637
Ipo13	ENSMUSG00000033365	4	117567091	117587604
Artn	ENSMUSG00000028539	4	117598767	117602368
St3gal3	ENSMUSG00000028538	4	117604759	117807519
Kdm4a	ENSMUSG00000033326	4	117809562	117852648
Ptprf	ENSMUSG00000033295	4	117880818	117964010
Hyi	ENSMUSG00000006395	4	118032595	118035349
Szt2	ENSMUSG00000033253	4	118035348	118081878
Med8	ENSMUSG00000006392	4	118081942	118088387
Elovl1	ENSMUSG00000006390	4	118100698	118105558
Cdc20	ENSMUSG00000006398	4	118105506	118109957
Mpl	ENSMUSG00000006389	4	118115020	118130118
Tie1	ENSMUSG00000033191	4	118143796	118162666
2610528J11Rik	ENSMUSG00000028536	4	118199604	118202833
Tmem125	ENSMUSG00000050854	4	118213546	118216649
Wdr65	ENSMUSG00000028730	4	118227156	118293382
Ebna1bp2	ENSMUSG00000028729	4	118293404	118300381
Olfr62	ENSMUSG00000043698	4	118338124	118339072
Olfr1342	ENSMUSG00000043383	4	118362067	118363068
Olfr1341	ENSMUSG00000046790	4	118381015	118382952
Olfr1340	ENSMUSG00000070821	4	118398854	118399804
Olfr1339	ENSMUSG00000070820	4	118407136	118408083
Olfr1338	ENSMUSG00000066063	4	118426200	118427141
Olfr1337	ENSMUSG00000061075	4	118454241	118455188
Olfr1335	ENSMUSG00000066061	4	118481402	118482549
Olfr1333	ENSMUSG00000073770	4	118502090	118508878
Olfr1331	ENSMUSG00000073769	4	118537263	118542341
Olfr1330	ENSMUSG00000073768	4	118565690	118566637
Olfr1329	ENSMUSG00000073767	4	118589129	118590070
Olfr1328	ENSMUSG00000073766	4	118606504	118607445
Lao1	ENSMUSG00000024903	4	118634183	118641517
Slc2a1	ENSMUSG00000028645	4	118781316	118809935
Zfp691	ENSMUSG00000045268	4	118842118	118846800
Ermap	ENSMUSG00000028644	4	118848062	118862616
Ccdc23	ENSMUSG00000028643	4	118867911	118873903
AU022252	ENSMUSG00000078584	4	118876175	118905317
4930538K18Rik	ENSMUSG00000028642	4	118877712	118890822
Lepre1	ENSMUSG00000028641	4	118905520	118921580
Cldn19	ENSMUSG00000066058	4	118928019	118935043
Ybx1	ENSMUSG00000028639	4	118950586	118967209
Ppih	ENSMUSG00000060288	4	118972615	118993151
Ccdc30	ENSMUSG00000028637	4	118995498	119088126
Gm12828	ENSMUSG00000086876	4	117118555	117127645
Gm12827	ENSMUSG00000087228	4	117169057	117173207
Gm12826	ENSMUSG00000083446	4	117186428	117186806
Gm12840	ENSMUSG00000086320	4	117372793	117373528
Gm12845	ENSMUSG00000085674	4	117398504	117399434
Gm12844	ENSMUSG00000084260	4	117401323	117401904
Gm12842	ENSMUSG00000083507	4	117497786	117498261
Gm17114	ENSMUSG00000091237	4	117507904	117541163
Gm20520	ENSMUSG00000091331	4	117540261	117541578
Gm12841	ENSMUSG00000085278	4	117556226	117558600
9530034E10Rik	ENSMUSG00000086554	4	117647641	117666577
Gm12858	ENSMUSG00000081921	4	118113618	118113825
Gm12859	ENSMUSG00000080857	4	118163387	118170247
Gm12857	ENSMUSG00000081233	4	118194623	118195214
Gm12853	ENSMUSG00000085292	4	118305452	118308667
Olfr1343-ps1	ENSMUSG00000086521	4	118345214	118346127
Gm12855	ENSMUSG00000081474	4	118463686	118464198
Olfr1332-ps1	ENSMUSG00000083336	4	118526697	118527650
Gm12856	ENSMUSG00000084133	4	118614665	118615957
Gm12863	ENSMUSG00000073765	4	118626879	118627524
Gm12861	ENSMUSG00000085895	4	118643902	118672063
Gm12865	ENSMUSG00000087238	4	118656663	118669803
Gm12864	ENSMUSG00000082143	4	118659619	118660624
Gm12862	ENSMUSG00000087464	4	118672265	118673090
Gm12866	ENSMUSG00000066060	4	118727395	118741716
Gm12867	ENSMUSG00000086683	4	118802897	118803606
Gm12868	ENSMUSG00000085505	4	118806354	118811406
Gm12898	ENSMUSG00000085626	4	118895779	118897420
Gm12927	ENSMUSG00000085203	4	118925127	118929580
Ldha-ps2	ENSMUSG00000083836	4	119006994	119008050
SNORA17	ENSMUSG00000089591	4	118652923	118653047
AL671520.1	ENSMUSG00000087807	4	117242739	117242812
Mir1957	ENSMUSG00000088552	4	118802384	118802449
SNORA70	ENSMUSG00000088303	4	117836683	117836786
Ppcs	ENSMUSG00000028636	4	119091135	119095025
Zmynd12	ENSMUSG00000070806	4	119095419	119140049
Rimkla	ENSMUSG00000048899	4	119137888	119165233
AA415398	ENSMUSG00000087385	4	119202913	119212134
Foxj3	ENSMUSG00000032998	4	119209609	119301724
Guca2a	ENSMUSG00000023247	4	119310309	119312076
Guca2b	ENSMUSG00000032978	4	119329212	119331559
Hivep3	ENSMUSG00000028634	4	119406389	119810650
Hivep3	ENSMUSG00000078582	4	119406401	119409373
Hivep3	ENSMUSG00000091688	4	119487167	119545940
Edn2	ENSMUSG00000028635	4	119833811	119839965
Foxo6	ENSMUSG00000052135	4	119939684	119959954
Gm12954	ENSMUSG00000082009	4	119174470	119175151
Gm12956	ENSMUSG00000082814	4	119182253	119182666
Gm12955	ENSMUSG00000080773	4	119191731	119192687
Gm12957	ENSMUSG00000084379	4	119193595	119193971
Gm12959	ENSMUSG00000081678	4	119226261	119226663
4732418A04Rik	ENSMUSG00000084929	4	119963955	119976497
BX470216.1	ENSMUSG00000092987	4	119078639	119078845
U6	ENSMUSG00000065240	4	119200605	119200711
Epb4.1	ENSMUSG00000028906	4	131479328	131631236
[truncated: 4,484 more rows]

## Sheet: Venn
									570 common elements in "DT", "PT", "FHA" and "Prn":						942 common elements in "DT", "PT" and "FHA":					108 common elements in "PT", "FHA" and "Prn":					260 common elements in "DT", "FHA" and "Prn":					373 common elements in "DT", "PT" and "Prn":
									ENSMUSG00000015316	Slamf1	MGI:1351314				ENSMUSG00000060771					ENSMUSG00000023094					ENSMUSG00000026032					ENSMUSG00000016918
									ENSMUSG00000038147	Cd84	MGI:1336885				ENSMUSG00000037216					ENSMUSG00000026735					ENSMUSG00000026037					ENSMUSG00000025938
									ENSMUSG00000073492	Gm10521	-				ENSMUSG00000026088					ENSMUSG00000026734					ENSMUSG00000038174					ENSMUSG00000042414
									ENSMUSG00000015314	Slamf6	MGI:1353620				ENSMUSG00000026087					ENSMUSG00000087103					ENSMUSG00000089822					ENSMUSG00000005886
									ENSMUSG00000026556	Vangl2	MGI:2135272				ENSMUSG00000092106					ENSMUSG00000085388					ENSMUSG00000085054					ENSMUSG00000025935
									ENSMUSG00000051251	Nhlh1	MGI:98481				ENSMUSG00000061584					ENSMUSG00000056329					ENSMUSG00000026023					ENSMUSG00000025937
									ENSMUSG00000003458	Ncstn	MGI:1891700				ENSMUSG00000026085					ENSMUSG00000084160					ENSMUSG00000041075					ENSMUSG00000067813
									ENSMUSG00000026553	Copa	MGI:1334462				ENSMUSG00000087374					ENSMUSG00000030373					ENSMUSG00000047361					ENSMUSG00000066918
									ENSMUSG00000003464	Pex19	MGI:1334458				ENSMUSG00000058407					ENSMUSG00000070799					ENSMUSG00000026021					ENSMUSG00000087782
									ENSMUSG00000026554	Dcaf8	MGI:91860				ENSMUSG00000026083					ENSMUSG00000070798					ENSMUSG00000064294					ENSMUSG00000077368
									ENSMUSG00000013698	Pea15a	MGI:104799				ENSMUSG00000089141					ENSMUSG00000070797					ENSMUSG00000026024					ENSMUSG00000064969
									ENSMUSG00000007122	Casq1	MGI:1309468				ENSMUSG00000026082					ENSMUSG00000074359					ENSMUSG00000059647					ENSMUSG00000070889
									ENSMUSG00000007107	Atp1a4	MGI:1351335				ENSMUSG00000037138					ENSMUSG00000070796					ENSMUSG00000047528					ENSMUSG00000060568
									ENSMUSG00000038034	Igsf8	MGI:2154090				ENSMUSG00000048814					ENSMUSG00000063305					ENSMUSG00000026031					ENSMUSG00000053664
									ENSMUSG00000007097	Atp1a2	MGI:88106				ENSMUSG00000026080					ENSMUSG00000065313					ENSMUSG00000026029					ENSMUSG00000026558
									ENSMUSG00000038026	Kcnj9	MGI:108007				ENSMUSG00000067604					ENSMUSG00000044903					ENSMUSG00000026028					ENSMUSG00000052428
									ENSMUSG00000044708	Kcnj10	MGI:1194504				ENSMUSG00000026078					ENSMUSG00000004542					ENSMUSG00000026027					ENSMUSG00000026687
									ENSMUSG00000050229	Pigm	MGI:1914806				ENSMUSG00000026077					ENSMUSG00000004540					ENSMUSG00000047383					ENSMUSG00000026688
									ENSMUSG00000026548	Slamf9	MGI:1923692				ENSMUSG00000073702					ENSMUSG00000065368					ENSMUSG00000090590					ENSMUSG00000040485
									ENSMUSG00000037995	Igsf9	MGI:2135283				ENSMUSG00000003134					ENSMUSG00000084801					ENSMUSG00000072295					ENSMUSG00000015843
									ENSMUSG00000026547	Tagln2	MGI:1312985				ENSMUSG00000003135					ENSMUSG00000044452					ENSMUSG00000038079					ENSMUSG00000026686
									ENSMUSG00000026546	Ccdc19	MGI:1919120				ENSMUSG00000048234					ENSMUSG00000044997					ENSMUSG00000079550					ENSMUSG00000052534
									ENSMUSG00000049598	Vsig8	MGI:3642995				ENSMUSG00000050967					ENSMUSG00000041592					ENSMUSG00000026035					ENSMUSG00000086925
									ENSMUSG00000053318	Slamf8	MGI:1921998				ENSMUSG00000057173					ENSMUSG00000093419					ENSMUSG00000038242					ENSMUSG00000093538
									ENSMUSG00000070504	Fcrl6	MGI:3618339				ENSMUSG00000085391					ENSMUSG00000093465					ENSMUSG00000026036					ENSMUSG00000086622
									ENSMUSG00000026544	Dusp23	MGI:1915690				ENSMUSG00000085280					ENSMUSG00000033731					ENSMUSG00000092149					ENSMUSG00000064426
									ENSMUSG00000037942	Crp	MGI:88512				ENSMUSG00000087131					ENSMUSG00000076721					ENSMUSG00000079554					ENSMUSG00000088246
									ENSMUSG00000026542	Apcs	MGI:98229				ENSMUSG00000092553					ENSMUSG00000076727					ENSMUSG00000051223					ENSMUSG00000015355
									ENSMUSG00000037924	Olfr16	MGI:106648				ENSMUSG00000092563					ENSMUSG00000076728					ENSMUSG00000026034					ENSMUSG00000059058
									ENSMUSG00000062527	Olfr1408	MGI:3031242				ENSMUSG00000085894					ENSMUSG00000076729					ENSMUSG00000064701					ENSMUSG00000065390
									ENSMUSG00000058981	Olfr1406	MGI:3031240				ENSMUSG00000090677					ENSMUSG00000076730					ENSMUSG00000089275					ENSMUSG00000088291
									ENSMUSG00000046643	Olfr218	MGI:3030052				ENSMUSG00000064936					ENSMUSG00000076731					ENSMUSG00000077616					ENSMUSG00000073481
									ENSMUSG00000049456	Olfr1404	MGI:3031238				ENSMUSG00000077704					ENSMUSG00000091301					ENSMUSG00000089276					ENSMUSG00000088559
									ENSMUSG00000005339	Fcer1a	MGI:95494				ENSMUSG00000065629					ENSMUSG00000076732					ENSMUSG00000026000					ENSMUSG00000088562
									ENSMUSG00000049605	Olfr418-ps1	MGI:3030252				ENSMUSG00000091937					ENSMUSG00000076733					ENSMUSG00000025991					ENSMUSG00000039349
									ENSMUSG00000079180	Gm11062	MGI:3779286				ENSMUSG00000026074					ENSMUSG00000057610					ENSMUSG00000086204					ENSMUSG00000026620
									ENSMUSG00000037872	Darc	MGI:1097689				ENSMUSG00000086705					ENSMUSG00000076734					ENSMUSG00000077745					ENSMUSG00000039318
									ENSMUSG00000005338	Cadm3	MGI:2137858				ENSMUSG00000026073					ENSMUSG00000091087					ENSMUSG00000082473					ENSMUSG00000026618
									ENSMUSG00000037860	Aim2	MGI:2686159				ENSMUSG00000026072					ENSMUSG00000076735					ENSMUSG00000093566					ENSMUSG00000026617
									ENSMUSG00000037849	Gm4955	MGI:3646410				ENSMUSG00000070942					ENSMUSG00000091843					ENSMUSG00000085075					ENSMUSG00000077571
									ENSMUSG00000070501	BC094916	MGI:3584522				ENSMUSG00000026069					ENSMUSG00000092156					ENSMUSG00000062209					ENSMUSG00000065581
									ENSMUSG00000073491	Pydc4	MGI:3695276				ENSMUSG00000026070					ENSMUSG00000091338					ENSMUSG00000087329					ENSMUSG00000065562
									ENSMUSG00000043263	Pyhin1	MGI:2138243				ENSMUSG00000026068					ENSMUSG00000076738					ENSMUSG00000093213					ENSMUSG00000027215
									ENSMUSG00000066677	Pydc3	MGI:2442822				ENSMUSG00000026065					ENSMUSG00000076739					ENSMUSG00000053153					ENSMUSG00000075024
									ENSMUSG00000089803	Gm10171	-				ENSMUSG00000026062					ENSMUSG00000042063					ENSMUSG00000045648					ENSMUSG00000085852
									ENSMUSG00000092085	Gm17224	-				ENSMUSG00000041945					ENSMUSG00000011171					ENSMUSG00000026196					ENSMUSG00000075025
									ENSMUSG00000085184	4933439K11Rik	MGI:MGI:1918569				ENSMUSG00000079588					ENSMUSG00000042050					ENSMUSG00000050296					ENSMUSG00000089073
									ENSMUSG00000066680	Olfr1407-ps1	-				ENSMUSG00000088965					ENSMUSG00000078984					ENSMUSG00000026192					ENSMUSG00000036885
									ENSMUSG00000088813	7SK	-				ENSMUSG00000025962					ENSMUSG00000021171					ENSMUSG00000026193					ENSMUSG00000027770
									ENSMUSG00000077252	SNORA17	-				ENSMUSG00000025961					ENSMUSG00000091262					ENSMUSG00000073652					ENSMUSG00000062200
									ENSMUSG00000070182	U6	-				ENSMUSG00000025959					ENSMUSG00000042029					ENSMUSG00000060125					ENSMUSG00000093699
									ENSMUSG00000073490	AI607873	MGI:2138302				ENSMUSG00000025958					ENSMUSG00000056553					ENSMUSG00000039395					ENSMUSG00000093484
									ENSMUSG00000073489	Ifi204	MGI:96429; MGI:3041120				ENSMUSG00000025956					ENSMUSG00000093765					ENSMUSG00000026189					ENSMUSG00000093646
									ENSMUSG00000026490	Cdc42bpa	MGI:2441841				ENSMUSG00000070871					ENSMUSG00000091100					ENSMUSG00000026188					ENSMUSG00000090261
									ENSMUSG00000026489	Adck3	MGI:1914676				ENSMUSG00000045005					ENSMUSG00000076740					ENSMUSG00000026187					ENSMUSG00000093434
									ENSMUSG00000010609	Psen2	MGI:109284				ENSMUSG00000051344					ENSMUSG00000076741					ENSMUSG00000039372					ENSMUSG00000093524
									ENSMUSG00000055676	Gm5069	-				ENSMUSG00000025955					ENSMUSG00000076742					ENSMUSG00000039354					ENSMUSG00000093474
									ENSMUSG00000038855	Itpkb	MGI:109235				ENSMUSG00000080817					ENSMUSG00000076743					ENSMUSG00000089965					ENSMUSG00000090010
									ENSMUSG00000053963	6330403A02Rik	MGI:2138735				ENSMUSG00000082373					ENSMUSG00000065685					ENSMUSG00000067744					ENSMUSG00000093414
									ENSMUSG00000026496	Parp1	MGI:1340806				ENSMUSG00000044689					ENSMUSG00000084629					ENSMUSG00000085812					ENSMUSG00000093767
									ENSMUSG00000058729	Lin9	MGI:1919818				ENSMUSG00000086836					ENSMUSG00000024042					ENSMUSG00000085769					ENSMUSG00000088824
									ENSMUSG00000026497	Mixl1	MGI:1351322				ENSMUSG00000086721					ENSMUSG00000002076					ENSMUSG00000093333					ENSMUSG00000027827
									ENSMUSG00000026499	Acbd3	MGI:2181074				ENSMUSG00000087213					ENSMUSG00000058392					ENSMUSG00000093247					ENSMUSG00000027828
									ENSMUSG00000060743	H3f3a	MGI:1097686; MGI:1101768				ENSMUSG00000084416					ENSMUSG00000038146					ENSMUSG00000093111					ENSMUSG00000074580
									ENSMUSG00000038806	BC031781	MGI:2384788				ENSMUSG00000090042					ENSMUSG00000037577					ENSMUSG00000075752					ENSMUSG00000034640
									ENSMUSG00000066652	Lefty2	MGI:2443573				ENSMUSG00000090886					ENSMUSG00000024002					ENSMUSG00000039342					ENSMUSG00000074579
									ENSMUSG00000026520	Pycr2	MGI:1277956				ENSMUSG00000093228					ENSMUSG00000024045					ENSMUSG00000046330					ENSMUSG00000027829
									ENSMUSG00000038793	Lefty1	MGI:107405				ENSMUSG00000077471					ENSMUSG00000002625					ENSMUSG00000039323					ENSMUSG00000090120
									ENSMUSG00000026519	Tmem63a	MGI:2384789				ENSMUSG00000070870					ENSMUSG00000024050					ENSMUSG00000026185					ENSMUSG00000048916
									ENSMUSG00000038776	Ephx1	MGI:95405				ENSMUSG00000025949					ENSMUSG00000052142					ENSMUSG00000026182					ENSMUSG00000065330
									ENSMUSG00000038768	9130409I23Rik	MGI:3588271				ENSMUSG00000025946					ENSMUSG00000053467					ENSMUSG00000055322					ENSMUSG00000087825
									ENSMUSG00000026516	Nvl	MGI:1914709				ENSMUSG00000025950					ENSMUSG00000079563					ENSMUSG00000061815					ENSMUSG00000093425
									ENSMUSG00000062169	Cnih4	MGI:1925828				ENSMUSG00000067299					ENSMUSG00000061126					ENSMUSG00000026180					ENSMUSG00000027833
									ENSMUSG00000038733	Wdr26	MGI:1923825				ENSMUSG00000025952					ENSMUSG00000091586					ENSMUSG00000048480					ENSMUSG00000034544
									ENSMUSG00000054135	A430110L20Rik	-				ENSMUSG00000073658					ENSMUSG00000048440					ENSMUSG00000087820					ENSMUSG00000065245
									ENSMUSG00000026514	Cnih3	MGI:1920228				ENSMUSG00000044429					ENSMUSG00000062464					ENSMUSG00000075767					ENSMUSG00000033191
									ENSMUSG00000050625	Ccdc121	MGI:2685601				ENSMUSG00000044816					ENSMUSG00000090700					ENSMUSG00000088666					ENSMUSG00000028536
									ENSMUSG00000047369	Dnahc14	MGI:MGI:2444525				ENSMUSG00000082565					ENSMUSG00000073424					ENSMUSG00000006304					ENSMUSG00000050854
									ENSMUSG00000090986	Gm17275	-				ENSMUSG00000082774					ENSMUSG00000024298					ENSMUSG00000064272					ENSMUSG00000028730
									ENSMUSG00000085563	2210411M09Rik	-				ENSMUSG00000033124					ENSMUSG00000055202					ENSMUSG00000006299					ENSMUSG00000028729
									ENSMUSG00000081214	Rpl35a-ps2	-				ENSMUSG00000026200					ENSMUSG00000059000					ENSMUSG00000026179					ENSMUSG00000043698
									ENSMUSG00000073485	Gm16067	-				ENSMUSG00000026201					ENSMUSG00000057254					ENSMUSG00000006301					ENSMUSG00000043383
									ENSMUSG00000089888	Gm16547	-				ENSMUSG00000026202					ENSMUSG00000024292					ENSMUSG00000073650					ENSMUSG00000046790
									ENSMUSG00000089927	Gm16539	-				ENSMUSG00000026203					ENSMUSG00000024055					ENSMUSG00000026177					ENSMUSG00000070821
									ENSMUSG00000084558	U6	-				ENSMUSG00000026204					ENSMUSG00000053600					ENSMUSG00000026176					ENSMUSG00000070820
									ENSMUSG00000092967	AC167020.1	-				ENSMUSG00000033061					ENSMUSG00000053390					ENSMUSG00000026175					ENSMUSG00000066063
									ENSMUSG00000079164	Tlr5	MGI:1858171				ENSMUSG00000026209					ENSMUSG00000067430					ENSMUSG00000065468					ENSMUSG00000061075
									ENSMUSG00000090533	Gm8214	-				ENSMUSG00000026208					ENSMUSG00000091548					ENSMUSG00000043429					ENSMUSG00000066061
									ENSMUSG00000039384	Dusp10	MGI:1927070				ENSMUSG00000026207					ENSMUSG00000002791					ENSMUSG00000038576					ENSMUSG00000073770
									ENSMUSG00000044854	1700056E22Rik	MGI:1920613				ENSMUSG00000033021					ENSMUSG00000091968					ENSMUSG00000084754					ENSMUSG00000073769
									ENSMUSG00000089057	U6	-				ENSMUSG00000033007					ENSMUSG00000024295					ENSMUSG00000081634					ENSMUSG00000073768
									ENSMUSG00000059483	Rpl21-ps1	-				ENSMUSG00000032997					ENSMUSG00000090984					ENSMUSG00000083575					ENSMUSG00000073767
									ENSMUSG00000039377	Hlx	MGI:96109				ENSMUSG00000026199					ENSMUSG00000091543					ENSMUSG00000086517					ENSMUSG00000073766
									ENSMUSG00000092578	4930488B22Rik	-				ENSMUSG00000085653					ENSMUSG00000091872					ENSMUSG00000083353					ENSMUSG00000024903
									ENSMUSG00000026621	Mosc1	MGI:1913362				ENSMUSG00000086053					ENSMUSG00000085948					ENSMUSG00000054779					ENSMUSG00000028645
									ENSMUSG00000085655	Gm15952	-				ENSMUSG00000026211					ENSMUSG00000077338					ENSMUSG00000083696					ENSMUSG00000045268
									ENSMUSG00000086392	A330050B17Rik	-				ENSMUSG00000051703					ENSMUSG00000088326					ENSMUSG00000080723					ENSMUSG00000028644
									ENSMUSG00000085320	Gm11548	-				ENSMUSG00000032968					ENSMUSG00000084600					ENSMUSG00000081093					ENSMUSG00000028643
									ENSMUSG00000085007	Gm11549	-				ENSMUSG00000026213					ENSMUSG00000088703					ENSMUSG00000027718					ENSMUSG00000078584
									ENSMUSG00000083388	Gm11550	-				ENSMUSG00000006576					ENSMUSG00000088406					ENSMUSG00000045031					ENSMUSG00000028642
									ENSMUSG00000082548	Gm12377	-				ENSMUSG00000082745					ENSMUSG00000065323					ENSMUSG00000037225					ENSMUSG00000028641
									ENSMUSG00000084027	Gm12376	-				ENSMUSG00000082059					ENSMUSG00000024640					ENSMUSG00000051444					ENSMUSG00000066058
									ENSMUSG00000086090	Gm12531	-				ENSMUSG00000083244					ENSMUSG00000090147					ENSMUSG00000050174					ENSMUSG00000028639
									ENSMUSG00000081705	Gm12582	-				ENSMUSG00000082528					ENSMUSG00000041491					ENSMUSG00000027722					ENSMUSG00000060288
									ENSMUSG00000082878	Gm12583	-				ENSMUSG00000004880					ENSMUSG00000087529					ENSMUSG00000076974					ENSMUSG00000028637
									ENSMUSG00000083857	Gm12584	-				ENSMUSG00000056699					ENSMUSG00000049247					ENSMUSG00000085931					ENSMUSG00000028636
									ENSMUSG00000027719	Adad1	MGI:103258				ENSMUSG00000022995					ENSMUSG00000024639					ENSMUSG00000081508					ENSMUSG00000070806
									ENSMUSG00000027720	Il2	MGI:96548				ENSMUSG00000064970					ENSMUSG00000057990					ENSMUSG00000087128					ENSMUSG00000048899
									ENSMUSG00000027709	Mccc1	MGI:1919289				ENSMUSG00000089429										ENSMUSG00000083359					ENSMUSG00000087385
									ENSMUSG00000047696	Ccdc144b	MGI:2681852				ENSMUSG00000026511										ENSMUSG00000088677					ENSMUSG00000032998
									ENSMUSG00000027710	Acad9	MGI:1914272				ENSMUSG00000091013										ENSMUSG00000088295					ENSMUSG00000023247
									ENSMUSG00000033883	D3Ertd254e	MGI:1098769				ENSMUSG00000026609										ENSMUSG00000030103					ENSMUSG00000032978
									ENSMUSG00000058400	Qrfpr	MGI:2677633				ENSMUSG00000026608										ENSMUSG00000030105					ENSMUSG00000028634
									ENSMUSG00000027712	Anxa5	MGI:106008				ENSMUSG00000037624										ENSMUSG00000030104					ENSMUSG00000078582
									ENSMUSG00000027713	1810062G17Rik	MGI:1919532				ENSMUSG00000026605										ENSMUSG00000043024					ENSMUSG00000091688
									ENSMUSG00000027714	Exosc9	MGI:1355319				ENSMUSG00000026604										ENSMUSG00000087341					ENSMUSG00000028635
									ENSMUSG00000027715	Ccna2	MGI:108069				ENSMUSG00000026603										ENSMUSG00000090576					ENSMUSG00000052135
									ENSMUSG00000037325	Bbs7	MGI:1918742				ENSMUSG00000010175										ENSMUSG00000068102					ENSMUSG00000080857
									ENSMUSG00000027716	Trpc3	MGI:109526				ENSMUSG00000090445										ENSMUSG00000030102					ENSMUSG00000081233
									ENSMUSG00000037270	4932438A13Rik	MGI:2444631				ENSMUSG00000079045										ENSMUSG00000039099					ENSMUSG00000085292
									ENSMUSG00000027824	Vmn2r1	MGI:3645892				ENSMUSG00000080505										ENSMUSG00000030544					ENSMUSG00000086521
									ENSMUSG00000043897	Vmn2r2	MGI:3757666				ENSMUSG00000084550										ENSMUSG00000030543					ENSMUSG00000081474
									ENSMUSG00000091572	Vmn2r3	MGI:3643995				ENSMUSG00000093064										ENSMUSG00000039062					ENSMUSG00000083336
[truncated: 819 more rows]
