# Supplementary material for: Genetic Variation in the Magnitude and Longevity of the IgG Subclass Response to a Diphtheria-Tetanus-Acellular Pertussis (DTaP) Vaccine in Mice
Source: Vaccines (Basel). 2019 Sep 20;7(4):124. doi: 10.3390/vaccines7040124 (PMC6963843; doi:10.3390/vaccines7040124)
Supplement: Supplementary file 1 [file vaccines-07-00124-s001.zip › Supplemental Data/wk14IgG3_genelist.xlsx]

## Sheet: wk14IgG3-DT
Gene Name	Ensembl Gene ID	Chromosome	Start	End
Epha4	ENSMUSG00000026235	1	77363760	77511663
Pax3	ENSMUSG00000004872	1	78097842	78193709
Sgpp2	ENSMUSG00000032908	1	78306921	78416861
Farsb	ENSMUSG00000026245	1	78414533	78485434
BC035947	ENSMUSG00000090486	1	78494381	78508538
Mogat1	ENSMUSG00000012187	1	78507566	78534748
Acsl3	ENSMUSG00000032883	1	78654400	78703562
Utp14b	ENSMUSG00000079470	1	78654613	78664163
Kcne4	ENSMUSG00000047330	1	78813502	78816599
Gm5830	ENSMUSG00000072978	1	78964212	78964654
U1	ENSMUSG00000065215	1	77894858	77895021
Cdh20	ENSMUSG00000050840	1	106665106	106892058
Rnf152	ENSMUSG00000047496	1	107173494	107253287
Pign	ENSMUSG00000056536	1	107417716	107555585
2310035C23Rik	ENSMUSG00000026319	1	107560438	107651708
Tnfrsf11a	ENSMUSG00000026321	1	107677300	107744558
Gm17634	ENSMUSG00000090759	1	107252584	107258201
Gm3608	ENSMUSG00000067017	1	107352560	107353433
Gm10193	ENSMUSG00000067015	1	107661021	107661251
Gm15699	ENSMUSG00000089866	1	106808008	106808910
U7	ENSMUSG00000089332	1	106793128	106793191
n-R5s216	ENSMUSG00000084704	1	106777501	106777612
AC101970.1	ENSMUSG00000080661	1	106641247	106641336
7SK	ENSMUSG00000088161	1	106382534	106382863
AC132082.1	ENSMUSG00000076999	1	107471264	107471359
U6	ENSMUSG00000089206	1	107842131	107842237
Zcchc2	ENSMUSG00000038866	1	107886983	107930651
Phlpp1	ENSMUSG00000044340	1	108068329	108290827
Bcl2	ENSMUSG00000057329	1	108434755	108610851
Kdsr	ENSMUSG00000009905	1	108616987	108656319
Vps4b	ENSMUSG00000009907	1	108660648	108693305
Serpinb5	ENSMUSG00000067006	1	108757750	108779925
Serpinb12	ENSMUSG00000059956	1	108831026	108853657
Serpinb13	ENSMUSG00000048775	1	108877561	108897772
Serpinb3a	ENSMUSG00000044594	1	108942164	108948914
Serpinb3d	ENSMUSG00000058017	1	108974744	108980083
Serpinb3b	ENSMUSG00000073602	1	109050517	109174938
Serpinb3c	ENSMUSG00000073601	1	109167778	109174948
Serpinb11	ENSMUSG00000026327	1	109258506	109277052
Serpinb7	ENSMUSG00000067001	1	109296232	109349266
D630008O14Rik	ENSMUSG00000054006	1	108438520	108471622
Pou2f3-rs1	ENSMUSG00000083613	1	108784429	108785474
Gm8080	ENSMUSG00000084228	1	108916714	108921902
Gm15388	ENSMUSG00000083884	1	109034421	109035146
Gm8084	ENSMUSG00000080729	1	109088052	109090134
Gm15390	ENSMUSG00000081114	1	109150130	109150867
Gm8089	ENSMUSG00000084189	1	109186918	109198931
Gm15391	ENSMUSG00000087210	1	109281777	109283989
SNORA17	ENSMUSG00000089278	1	109336624	109336754
Serpinb2	ENSMUSG00000062345	1	109408000	109432055
Serpinb10-ps	ENSMUSG00000092572	1	109425580	109445848
Serpinb8	ENSMUSG00000026315	1	109486583	109505486
Gm15389	ENSMUSG00000086161	1	109583585	109590091
SNORA17	ENSMUSG00000077237	1	109789551	109789682
U6	ENSMUSG00000064683	1	109653179	109653285
Cdh7	ENSMUSG00000026312	1	111878904	112036734
SNORA17	ENSMUSG00000089037	1	111519585	111519714
7SK	ENSMUSG00000084741	1	111701337	111701621
Cdh19	ENSMUSG00000047216	1	112785772	112873949
Dsel	ENSMUSG00000038702	1	113755279	113761486
Cacna1e	ENSMUSG00000004110	1	156239649	156573049
Ier5	ENSMUSG00000056708	1	156943497	156946766
Mr1	ENSMUSG00000026471	1	156975008	156993910
Stx6	ENSMUSG00000026470	1	157005833	157050647
BC034090	ENSMUSG00000033722	1	157059603	157079870
Xpr1	ENSMUSG00000026469	1	157122831	157264545
Acbd6	ENSMUSG00000033701	1	157405250	157534363
Lhx4	ENSMUSG00000026468	1	157545166	157589250
Qsox1	ENSMUSG00000033684	1	157625285	157660013
Cep350	ENSMUSG00000033671	1	157692096	157820020
Tor1aip1	ENSMUSG00000026466	1	157851729	157883610
Tor1aip2	ENSMUSG00000050565	1	157882533	157915991
Tor1aip2	ENSMUSG00000079252	1	157882856	157900866
Fam163a	ENSMUSG00000015484	1	157923096	158135156
Nphs2	ENSMUSG00000026602	1	158240858	158258166
9430070O13Rik	ENSMUSG00000026601	1	158295060	158330121
Gm2000	ENSMUSG00000078193	1	158296169	158296613
Soat1	ENSMUSG00000026600	1	158358239	158404459
Abl2	ENSMUSG00000026596	1	158488917	158579699
Gm9530	ENSMUSG00000086217	1	156910653	156930396
Gm5532	ENSMUSG00000073535	1	157367303	157374241
Tdrd5	ENSMUSG00000060985	1	158185426	158233795
Gm10031	ENSMUSG00000057808	1	158454362	158455283
U2	ENSMUSG00000077419	1	157801704	157801852
AC116712.1	ENSMUSG00000093286	1	157163096	157163219
Tor3a	ENSMUSG00000060519	1	158583748	158604487
Fam20b	ENSMUSG00000033557	1	158608676	158649132
Ralgps2	ENSMUSG00000026594	1	158734297	158869757
Angptl1	ENSMUSG00000033544	1	158768693	158791209
1700057K13Rik	ENSMUSG00000026592	1	159029279	159038811
Rasal2	ENSMUSG00000070565	1	159065314	159342726
Gm15428	ENSMUSG00000046057	1	158723643	158723975
Gm6058	ENSMUSG00000087632	1	159314062	159314460
2810025M15Rik	ENSMUSG00000049881	1	159342483	159350366
BC026585	ENSMUSG00000033488	1	159388711	159419191
Gm15486	ENSMUSG00000087093	1	159428006	159441852
Sec16b	ENSMUSG00000026589	1	159436859	159498556
Fam5b	ENSMUSG00000004031	1	160175402	160286391
Astn1	ENSMUSG00000026587	1	160292471	160621917
Mir488	ENSMUSG00000070103	1	160435756	160435864
Pappa2	ENSMUSG00000073530	1	160641862	160887870
Prkcq	ENSMUSG00000026778	2	11093740	11222853
Pfkfb3	ENSMUSG00000026773	2	11393057	11423728
Rbm17	ENSMUSG00000037197	2	11507066	11525780
Gm17355	ENSMUSG00000091689	2	11546914	11546967
Gm17490	ENSMUSG00000091312	2	11547233	11547891
Il2ra	ENSMUSG00000026770	2	11564419	11614818
Il15ra	ENSMUSG00000023206	2	11626914	11655613
Fbxo18	ENSMUSG00000058594	2	11664200	11699209
Ankrd16	ENSMUSG00000047909	2	11699503	11711952
Itga8	ENSMUSG00000026768	2	12028259	12223547
Fam188a	ENSMUSG00000026767	2	12268890	12341096
Pter	ENSMUSG00000026730	2	12845668	12925080
Gm13264	ENSMUSG00000085257	2	10958501	10970693
Gm13297	ENSMUSG00000081693	2	11012506	11013391
Gm13294	ENSMUSG00000083900	2	11021415	11021891
Gm13293	ENSMUSG00000086006	2	11261116	11264239
Gm13295	ENSMUSG00000080905	2	11274141	11274396
Gm13291	ENSMUSG00000086491	2	11306630	11308691
Gm13292	ENSMUSG00000082424	2	11330657	11331658
Gm13296	ENSMUSG00000082314	2	11341849	11342863
Gm13260	ENSMUSG00000082727	2	11529041	11529909
Gm13310	ENSMUSG00000080801	2	12004239	12005630
E030013I19Rik	ENSMUSG00000086843	2	12222574	12232927
Gm13321	ENSMUSG00000083547	2	12343252	12343650
SNORA68	ENSMUSG00000089007	2	10936389	10936517
U4	ENSMUSG00000084560	2	11009408	11009540
C1ql3	ENSMUSG00000049630	2	12925084	12933374
U3	ENSMUSG00000089566	2	12901131	12901238
Rsu1	ENSMUSG00000026727	2	12998594	13193058
Cubn	ENSMUSG00000026726	2	13197965	13413551
Gm13270	ENSMUSG00000086358	2	13193229	13246418
H2afb1	ENSMUSG00000062651	2	17918049	17918573
A930004D18Rik	ENSMUSG00000054057	2	17946820	17959364
2810030E01Rik	ENSMUSG00000054074	2	17962303	17970678
Mllt10	ENSMUSG00000026743	2	17976898	18134017
Dnajc1	ENSMUSG00000026740	2	18117281	18314457
Commd3	ENSMUSG00000051154	2	18594011	18597858
Bmi1	ENSMUSG00000026739	2	18598645	18608256
Gm13334	ENSMUSG00000087182	2	18615659	18620664
BC061194	ENSMUSG00000037708	2	18620628	18672040
Pip4k2a	ENSMUSG00000026737	2	18763882	18919753
4930426L09Rik	ENSMUSG00000026736	2	18919970	18921428
Armc3	ENSMUSG00000037683	2	19120745	19231868
Msrb2	ENSMUSG00000023094	2	19293067	19316603
Ptf1a	ENSMUSG00000026735	2	19367290	19369128
4921504E06Rik	ENSMUSG00000026734	2	19384464	19475541
Otud1	ENSMUSG00000043415	2	19579689	19582217
Gm13329	ENSMUSG00000081116	2	17919868	17920132
Gm13330	ENSMUSG00000085319	2	17954160	17961260
1810059C17Rik	ENSMUSG00000086340	2	17975820	17978240
Gm13351	ENSMUSG00000081619	2	18100656	18101069
Gm13350	ENSMUSG00000083070	2	18170992	18171470
Gm13349	ENSMUSG00000082520	2	18260206	18260616
Gm13354	ENSMUSG00000082742	2	18415996	18416164
Gm13353	ENSMUSG00000081181	2	18489753	18489825
Gm13355	ENSMUSG00000082943	2	18563413	18563729
Gm13352	ENSMUSG00000086882	2	18570712	18570973
Gm20539	ENSMUSG00000092353	2	18664342	18682489
Gm13333	ENSMUSG00000081139	2	18680611	18681391
Gm13332	ENSMUSG00000083281	2	19023328	19024725
4930447M23Rik	ENSMUSG00000087674	2	19265944	19272677
Gm13344	ENSMUSG00000087103	2	19350731	19353610
Gm13336	ENSMUSG00000085388	2	19363135	19368301
1810010K12Rik	ENSMUSG00000056329	2	19373455	19376622
Gm13345	ENSMUSG00000084160	2	19430717	19430944
Gm13348	ENSMUSG00000086621	2	19555661	19558613
Gm13343	ENSMUSG00000080227	2	19573871	19573975
Gm13346	ENSMUSG00000087246	2	19598338	19607784
Gm13347	ENSMUSG00000083893	2	19598878	19600230
SNORA17	ENSMUSG00000077342	2	19612915	19613046
AL928557.1	ENSMUSG00000092814	2	18051079	18051204
U6	ENSMUSG00000064964	2	18080314	18080418
Etl4	ENSMUSG00000036617	2	19831407	20732340
Gm13361	ENSMUSG00000083777	2	19887594	19889024
Gm13363	ENSMUSG00000060795	2	19914548	19915069
Gm13360	ENSMUSG00000082164	2	19958723	19959521
SNORA32	ENSMUSG00000065644	2	19856490	19856580
Gm13328	ENSMUSG00000081128	2	20156672	20157691
Gm17171	ENSMUSG00000091457	2	20222444	20246297
U6	ENSMUSG00000065253	2	20202146	20202252
Gm13335	ENSMUSG00000085477	2	20342197	20354561
Arhgap21	ENSMUSG00000036591	2	20769546	20890508
Gm13362	ENSMUSG00000086418	2	20631002	20634861
Gm13380	ENSMUSG00000085206	2	20843487	20853016
Gm13375	ENSMUSG00000075514	2	20890681	20891624
Gm13377	ENSMUSG00000086821	2	20966435	21063581
Gm13376	ENSMUSG00000087219	2	21018726	21042286
Enkur	ENSMUSG00000026679	2	21102358	21126992
Thnsl1	ENSMUSG00000048550	2	21127351	21136636
Gpr158	ENSMUSG00000045967	2	21289169	21752174
Gm13378	ENSMUSG00000084071	2	21165732	21166067
Gm13327	ENSMUSG00000085680	2	21263552	21290738
5S_rRNA	ENSMUSG00000089472	2	21092710	21092840
7SK	ENSMUSG00000089576	2	21119317	21119493
Gm13437	ENSMUSG00000083431	2	36929542	36937975
Gm13434	ENSMUSG00000086667	2	36943808	36944684
Olfr363-ps	ENSMUSG00000068948	2	36961777	36962030
Gm13435	ENSMUSG00000083815	2	37062571	37063593
Olfr367-ps	ENSMUSG00000049094	2	37122471	37126907
Gm13543	ENSMUSG00000083745	2	37527728	37528523
Gm13556	ENSMUSG00000087294	2	38141775	38142811
Gm13584	ENSMUSG00000087539	2	38215100	38219500
Gm13589	ENSMUSG00000085950	2	38279522	38311371
Gm13588	ENSMUSG00000084124	2	38345624	38345758
Gm13586	ENSMUSG00000082931	2	38478321	38478784
Gpr144	ENSMUSG00000083722	2	38526678	38543171
Gm13587	ENSMUSG00000087062	2	38528057	38532072
4933433P16Rik	ENSMUSG00000087164	2	38568196	38576158
Gm13591	ENSMUSG00000082508	2	38633256	38633861
Gm13507	ENSMUSG00000085201	2	38678777	38707890
Gm13473	ENSMUSG00000083776	2	38794863	38795449
Gm13474	ENSMUSG00000084184	2	38829467	38832336
Gm13496	ENSMUSG00000085755	2	38852233	38853778
Olfr360	ENSMUSG00000083361	2	36921266	36924780
Olfr361	ENSMUSG00000075378	2	36940298	36941266
Olfr362	ENSMUSG00000075377	2	36960215	36961168
Olfr364-ps1	ENSMUSG00000078198	2	37001734	37002657
Olfr365	ENSMUSG00000059429	2	37056763	37057701
Olfr366	ENSMUSG00000068947	2	37075011	37075940
Olfr368	ENSMUSG00000049018	2	37187269	37188253
Pdcl	ENSMUSG00000009030	2	37205594	37214852
Rc3h2	ENSMUSG00000075376	2	37225589	37278423
Zbtb6	ENSMUSG00000066798	2	37281020	37298691
Zbtb26	ENSMUSG00000050714	2	37287688	37298641
Rabgap1	ENSMUSG00000035437	2	37298799	37421974
Strbp	ENSMUSG00000026915	2	37338748	37559379
Gpr21	ENSMUSG00000053164	2	37371852	37376123
Crb2	ENSMUSG00000035403	2	37631769	37654623
Dennd1a	ENSMUSG00000035392	2	37654510	38142910
Lhx2	ENSMUSG00000000247	2	38194801	38225253
Nek6	ENSMUSG00000026749	2	38367163	38443561
Psmb7	ENSMUSG00000026750	2	38443556	38499607
Nr5a1	ENSMUSG00000026751	2	38548176	38570062
Nr6a1	ENSMUSG00000063972	2	38578890	38783208
Olfml2a	ENSMUSG00000046618	2	38787498	38819273
Wdr38	ENSMUSG00000035295	2	38852996	38861688
Rpl35	ENSMUSG00000062997	2	38857100	38861144
Arpc5l	ENSMUSG00000026755	2	38863596	38871397
Golga1	ENSMUSG00000026754	2	38871781	38921061
AL935155.1	ENSMUSG00000092651	2	38753649	38753937
U6	ENSMUSG00000064468	2	38335858	38335965
Mir5128	ENSMUSG00000092958	2	37543721	37543804
U6	ENSMUSG00000064626	2	37137571	37137677
Mir181b-2	ENSMUSG00000065578	2	38709350	38709438
Snord90	ENSMUSG00000077756	2	37255567	37255677
U6	ENSMUSG00000065127	2	38883297	38883403
AL844842.1	ENSMUSG00000092689	2	38492538	38492663
Mir181a-2	ENSMUSG00000065423	2	38708255	38708330
Grb14	ENSMUSG00000026888	2	64750533	64863044
Cobll1	ENSMUSG00000034903	2	64926396	65077460
Slc38a11	ENSMUSG00000061171	2	65154487	65202091
Scn3a	ENSMUSG00000057182	2	65295175	65405684
Scn2a1	ENSMUSG00000075318	2	65458914	65605504
Csrnp3	ENSMUSG00000044647	2	65683824	65869603
Galnt3	ENSMUSG00000026994	2	65920823	65963051
Ttc21b	ENSMUSG00000034848	2	66022384	66094674
Scn1a	ENSMUSG00000064329	2	66108838	66278897
Scn9a	ENSMUSG00000075316	2	66318137	66473009
Gm13578	ENSMUSG00000084104	2	64706056	64706645
Gm13594	ENSMUSG00000086881	2	65076813	65077732
Gm13592	ENSMUSG00000083707	2	65115474	65116483
Gm13593	ENSMUSG00000080766	2	65134235	65135426
Gm13595	ENSMUSG00000086701	2	65347322	65350662
Gm13619	ENSMUSG00000052865	2	65690465	65698676
Gm13617	ENSMUSG00000085160	2	65782356	65792127
Gm13616	ENSMUSG00000080728	2	65983711	65983932
Gm13618	ENSMUSG00000086671	2	66025893	66030870
Gm13630	ENSMUSG00000085386	2	66247551	66259645
Gm13629	ENSMUSG00000087301	2	66278937	66384083
Rpl35-ps1	ENSMUSG00000080855	2	66285093	66285464
Gm13627	ENSMUSG00000081307	2	66367471	66368803
SNORA17	ENSMUSG00000088197	2	65214226	65214339
7SK	ENSMUSG00000088994	2	66440572	66440855
SNORD26	ENSMUSG00000088306	2	65966189	65966268
Ralgapb	ENSMUSG00000027652	2	158235584	158324989
Adig	ENSMUSG00000044405	2	158328348	158333934
Arhgap40	ENSMUSG00000074625	2	158338532	158376498
Slc32a1	ENSMUSG00000037771	2	158436494	158441484
Actr5	ENSMUSG00000037761	2	158450624	158464947
Ppp1r16b	ENSMUSG00000037754	2	158491134	158592070
Fam83d	ENSMUSG00000027654	2	158593829	158612373
Dhx35	ENSMUSG00000027655	2	158620543	158683950
Gm826	ENSMUSG00000074623	2	160137129	160159898
Mafb	ENSMUSG00000074622	2	160189413	160192801
Gm14200	ENSMUSG00000081800	2	158293685	158294133
Gm14204	ENSMUSG00000086496	2	158421208	158436459
Gm14205	ENSMUSG00000087563	2	158436646	158437556
Gm14219	ENSMUSG00000083913	2	159281906	159282193
Gm11445	ENSMUSG00000083451	2	159603412	159603943
Gm11446	ENSMUSG00000081215	2	159684161	159685026
Gm14223	ENSMUSG00000086558	2	159737509	159773112
4933416E03Rik	ENSMUSG00000085198	2	159773077	159807024
Gm14220	ENSMUSG00000083329	2	159804010	159804458
9130015L21Rik	ENSMUSG00000086653	2	159842389	159866355
Mir3474	ENSMUSG00000093120	2	158464319	158464376
Y_RNA	ENSMUSG00000084644	2	158313338	158313423
SNORA17	ENSMUSG00000077188	2	158965097	158965228
AL663077.1	ENSMUSG00000093040	2	158565874	158565999
Cdh4	ENSMUSG00000000305	2	179177136	179634078
Gm10711	ENSMUSG00000074518	2	179628614	179629398
Taf4a	ENSMUSG00000039117	2	179646851	179711351
Lsm14b	ENSMUSG00000039108	2	179759692	179770170
Psma7	ENSMUSG00000027566	2	179771078	179777138
Ss18l1	ENSMUSG00000039086	2	179777214	179804906
Gtpbp5	ENSMUSG00000039069	2	179805293	179820607
Hrh3	ENSMUSG00000039059	2	179834170	179839193
Osbpl2	ENSMUSG00000039050	2	179854011	179897385
Adrm1	ENSMUSG00000039041	2	179906190	179910991
Lama5	ENSMUSG00000015647	2	179911078	179960564
Rps21	ENSMUSG00000039001	2	179992082	179993150
Cables2	ENSMUSG00000038990	2	179993245	180008201
BC066135	ENSMUSG00000038980	2	180012351	180024584
Gata5	ENSMUSG00000015627	2	180059838	180069404
Gm14318	ENSMUSG00000056061	2	180067562	180075437
Slco4a1	ENSMUSG00000038963	2	180190950	180209572
Ntsr1	ENSMUSG00000027568	2	180234681	180279685
1600027N09Rik	ENSMUSG00000027569	2	180316009	180321009
Ogfr	ENSMUSG00000049401	2	180323950	180330541
Col9a3	ENSMUSG00000027570	2	180332495	180356894
Tcfl5	ENSMUSG00000038932	2	180356661	180377413
Dido1	ENSMUSG00000038914	2	180392669	180444704
2310003C23Rik	ENSMUSG00000027573	2	180444822	180453438
Slc17a9	ENSMUSG00000023393	2	180459968	180476985
Bhlhe23	ENSMUSG00000045493	2	180509086	180511605
Ythdf1	ENSMUSG00000038848	2	180639082	180655654
Birc7	ENSMUSG00000038840	2	180663728	180668715
Nkain4	ENSMUSG00000027574	2	180669477	180689404
Arfgap1	ENSMUSG00000027575	2	180701930	180717231
9230112E08Rik	ENSMUSG00000070461	2	180718937	180720296
Col20a1	ENSMUSG00000016356	2	180721240	180752245
Chrna4	ENSMUSG00000027577	2	180753085	180778251
Kcnq2	ENSMUSG00000016346	2	180810284	180869996
Eef1a2	ENSMUSG00000016349	2	180882358	180891719
Ppdpf	ENSMUSG00000016344	2	180921952	180923476
Ptk6	ENSMUSG00000038751	2	180928426	180937494
Srms	ENSMUSG00000027579	2	180940267	180947890
BC051628	ENSMUSG00000047841	2	180954718	180957559
BC006779	ENSMUSG00000027580	2	180962320	180976732
Gmeb2	ENSMUSG00000038705	2	180986154	181022740
Stmn3	ENSMUSG00000027581	2	181041164	181049205
Rtel1	ENSMUSG00000038685	2	181054444	181091321
Arfrp1	ENSMUSG00000038671	2	181092395	181100109
Zgpat	ENSMUSG00000027582	2	181099633	181118333
Lime1	ENSMUSG00000090077	2	181114783	181118333
Zbtb46	ENSMUSG00000027583	2	181122467	181194131
Abhd16b	ENSMUSG00000055882	2	181227911	181229685
Tpd52l2	ENSMUSG00000000827	2	181231847	181252671
Dnajc5	ENSMUSG00000000826	2	181255190	181289838
Uckl1	ENSMUSG00000089917	2	181303854	181319597
Znf512b	ENSMUSG00000000823	2	181316808	181327508
Prpf6	ENSMUSG00000002455	2	181326573	181390365
Samd10	ENSMUSG00000038605	2	181329923	181333917
Gm14300	ENSMUSG00000083410	2	179347327	179348272
4921531C22Rik	ENSMUSG00000085704	2	179710698	179713718
Gm14299	ENSMUSG00000082850	2	179727893	179728289
Gm17180	ENSMUSG00000090589	2	179834618	179836207
B230312C02Rik	ENSMUSG00000084843	2	180105196	180120590
Gm14343	ENSMUSG00000087550	2	180500919	180510108
Gm14340	ENSMUSG00000074507	2	180553048	180559335
Gm14342	ENSMUSG00000086166	2	180564195	180624365
Gm14344	ENSMUSG00000085428	2	180571186	180583619
Gm14339	ENSMUSG00000085728	2	180582357	180583751
Gm14341	ENSMUSG00000087293	2	180689169	180701517
Gm14398	ENSMUSG00000083993	2	180951432	180952504
Gm14447	ENSMUSG00000084033	2	181026853	181027640
Slc2a4rg-ps	ENSMUSG00000085028	2	181118955	181122291
Gm16119	ENSMUSG00000010492	2	181313185	181319875
U1	ENSMUSG00000088378	2	181247255	181247417
U6	ENSMUSG00000089612	2	181160640	181160742
Mir3091	ENSMUSG00000092827	2	179992241	179992316
Mir124a-3	ENSMUSG00000065454	2	180628736	180628822
HAR1F	ENSMUSG00000088334	2	180572532	180572663
U6	ENSMUSG00000084696	2	180918217	180918320
AL663067.1	ENSMUSG00000080507	2	179725502	179725587
U6	ENSMUSG00000064422	2	180432768	180432874
Mir133a-2	ENSMUSG00000065460	2	180133084	180133187
Mir1a-1	ENSMUSG00000070144	2	180123753	180123829
Sox18	ENSMUSG00000046470	2	181404541	181406345
Tcea2	ENSMUSG00000059540	2	181415015	181422776
Rgs19	ENSMUSG00000002458	2	181423124	181428682
4930526D03Rik	ENSMUSG00000045794	2	181431498	181433147
Oprl1	ENSMUSG00000027584	2	181449721	181455690
Myt1	ENSMUSG00000010505	2	181498037	181562502
Gm14489	ENSMUSG00000082786	2	181458747	181459647
U6	ENSMUSG00000077518	2	181397011	181397117
Pcmtd2	ENSMUSG00000027589	2	181572559	181592166
Polr3k	ENSMUSG00000038628	2	181599042	181605535
Gm14496	ENSMUSG00000053277	2	181725841	181731135
Gm5466	ENSMUSG00000083397	2	181631528	181633417
Gm16337	ENSMUSG00000089794	3	9757607	9786142
Chmp4c	ENSMUSG00000027536	3	10366907	10391005
C030034L19Rik	ENSMUSG00000085362	3	9403064	9437233
Snx16	ENSMUSG00000027534	3	10417819	10440124
Gm8910	ENSMUSG00000069106	3	11013518	11015193
Zbtb10	ENSMUSG00000069114	3	9250602	9285333
Zfp704	ENSMUSG00000040209	3	9427011	9610085
Pag1	ENSMUSG00000027508	3	9687479	9833679
Fabp5	ENSMUSG00000027533	3	10012548	10016607
Gm9833	ENSMUSG00000049230	3	10088173	10092564
Pmp2	ENSMUSG00000052468	3	10179851	10183885
Fabp9	ENSMUSG00000027528	3	10193626	10197222
Fabp4	ENSMUSG00000062515	3	10204347	10208576
Fabp12	ENSMUSG00000027530	3	10244209	10301183
Impa1	ENSMUSG00000027531	3	10313540	10331439
Slc10a5	ENSMUSG00000058921	3	10331734	10335656
Zfand1	ENSMUSG00000039795	3	10339953	10351317
7SK	ENSMUSG00000088229	3	9402175	9402485
5S_rRNA	ENSMUSG00000088004	3	9829620	9829728
SNORA17	ENSMUSG00000087858	3	10975469	10975586
AC127294.1	ENSMUSG00000093022	3	11154337	11154437
Gm8935	ENSMUSG00000045699	3	12855996	12856403
Gm2464	ENSMUSG00000078587	3	13471906	13474596
Rsrc1	ENSMUSG00000034544	3	66785312	67162318
Gm17402	ENSMUSG00000090408	3	67169383	67179085
Mlf1	ENSMUSG00000048416	3	67178019	67203925
Gfm1	ENSMUSG00000027774	3	67234018	67280451
Lxn	ENSMUSG00000047557	3	67261920	67267848
Rarres1	ENSMUSG00000049404	3	67282894	67319445
Mfsd1	ENSMUSG00000027775	3	67386690	67408153
Iqcj	ENSMUSG00000051777	3	67696142	67860515
Schip1	ENSMUSG00000027777	3	67868864	68430404
Gm5848	ENSMUSG00000068979	3	68112747	68113103
Il12a	ENSMUSG00000027776	3	68494566	68502469
Gm17641	ENSMUSG00000091272	3	68671839	68674188
1110032F04Rik	ENSMUSG00000046999	3	68673508	68676085
Ift80	ENSMUSG00000027778	3	68696421	68808492
Smc4	ENSMUSG00000034349	3	68808660	68838545
Trim59	ENSMUSG00000034317	3	68839210	68848677
Kpna4	ENSMUSG00000027782	3	68871071	68931035
Gm10040	ENSMUSG00000058360	3	68537059	68541999
RP24-399B3.3	ENSMUSG00000093384	3	68704093	68704371
RP24-399B3.4	ENSMUSG00000093730	3	68705752	68706066
Gm18588	ENSMUSG00000093402	3	68706189	68706680
RP24-399B3.1	ENSMUSG00000093505	3	68707742	68708074
Arl14	ENSMUSG00000027783	3	69026341	69027538
Mir16-2	ENSMUSG00000065606	3	68813824	68813918
U2	ENSMUSG00000084617	3	68351442	68351630
SNORA17	ENSMUSG00000077459	3	67377082	67377213
snoU90	ENSMUSG00000089417	3	68889027	68889369
Mir15b	ENSMUSG00000065580	3	68813678	68813775
Ppm1l	ENSMUSG00000027784	3	69120783	69364724
Gm17214	ENSMUSG00000091315	3	69123967	69124507
Gm17212	ENSMUSG00000090941	3	69139424	69139682
B3galnt1	ENSMUSG00000043300	3	69378108	69402783
Gm17213	ENSMUSG00000090743	3	69234931	69236290
Rpl32-ps	ENSMUSG00000068969	3	69520908	69521315
Nmd3	ENSMUSG00000027787	3	69525907	69552964
1110032A04Rik	ENSMUSG00000043461	3	69623460	69663818
Otol1	ENSMUSG00000027788	3	69811535	69832630
SNORA17	ENSMUSG00000077366	3	69766237	69766367
5S_rRNA	ENSMUSG00000087848	3	69489389	69489502
SNORA17	ENSMUSG00000089507	3	70032669	70032796
Gm10780	ENSMUSG00000074877	3	70493014	70493302
Pdgfc	ENSMUSG00000028019	3	80840338	81017962
Gm9989	ENSMUSG00000056023	3	81725190	81728385
Ctso	ENSMUSG00000028015	3	81736523	81760647
Tdo2	ENSMUSG00000028011	3	81761012	81780124
Accn5	ENSMUSG00000028008	3	81786212	81825155
Gucy1b3	ENSMUSG00000028005	3	81835926	81878633
Gucy1a3	ENSMUSG00000033910	3	81896350	81949799
Mtap9	ENSMUSG00000033900	3	82161994	82199190
Npy2r	ENSMUSG00000028004	3	82342305	82352008
Rbm46	ENSMUSG00000033882	3	82641155	82680405
Lrat	ENSMUSG00000028003	3	82696501	82707895
Gm16000	ENSMUSG00000085106	3	80841330	80844359
4930564K09Rik	ENSMUSG00000086273	3	82680627	82747560
SNORA17	ENSMUSG00000089444	3	81684649	81684788
7SK	ENSMUSG00000087902	3	82597578	82597819
Fgg	ENSMUSG00000033860	3	82811781	82818975
Fga	ENSMUSG00000028001	3	82830075	82838036
Fgb	ENSMUSG00000033831	3	82846169	82853725
Plrg1	ENSMUSG00000027998	3	82859444	82876277
Gm10710	ENSMUSG00000074517	3	82929198	82933168
Gm6525	ENSMUSG00000078175	3	83978696	83979016
Gm8813	ENSMUSG00000085625	3	84356780	84357374
Dear1	ENSMUSG00000078550	3	84768978	84769502
Sfrp2	ENSMUSG00000027996	3	83570243	83578238
Tlr2	ENSMUSG00000027995	3	83640195	83645689
D930015E06Rik	ENSMUSG00000033767	3	83702131	83844083
Mnd1	ENSMUSG00000033752	3	83891856	83959708
Trim2	ENSMUSG00000027993	3	83964361	84109368
Fhdc1	ENSMUSG00000041842	3	84247947	84284351
Arfip1	ENSMUSG00000074513	3	84300015	85691438
Tigd4	ENSMUSG00000047819	3	84397496	84400954
Tmem154	ENSMUSG00000056498	3	84470114	84508497
Fbxw7	ENSMUSG00000028086	3	84619190	84783120
Gm16790	ENSMUSG00000085848	3	83577775	83593878
7SK	ENSMUSG00000084596	3	83438499	83438796
U6	ENSMUSG00000088597	3	83506174	83506280
Gm15535	ENSMUSG00000085527	3	85359968	85377867
Pet112l	ENSMUSG00000028085	3	85378041	85459544
Fam160a1	ENSMUSG00000051000	3	85463983	85550188
Mir466k	ENSMUSG00000080424	3	85271299	85271420
Gm9790	ENSMUSG00000044330	3	85719705	85719992
Glt28d2	ENSMUSG00000031286	3	85604969	85691440
Prss48	ENSMUSG00000049013	3	85797732	85806413
U7	ENSMUSG00000089077	3	85766693	85766754
U6	ENSMUSG00000064840	3	85712275	85712381
SNORA32	ENSMUSG00000077517	3	85754810	85754928
Sh3d19	ENSMUSG00000028082	3	85888356	85934444
SNORA32	ENSMUSG00000065847	3	85904456	85904577
Rps3a	ENSMUSG00000028081	3	85941862	85946624
Snord73a	ENSMUSG00000064984	3	85942713	85942780
Rnu73b	ENSMUSG00000064390	3	85944540	85944610
Lrba	ENSMUSG00000028080	3	86028602	86586615
U6	ENSMUSG00000089394	3	85995338	85995448
SNORA17	ENSMUSG00000077744	3	86079154	86079284
U1	ENSMUSG00000065764	3	86168379	86168547
U6	ENSMUSG00000064867	3	86188169	86188275
Gm3788	ENSMUSG00000091955	3	86475690	86476166
Mab21l2	ENSMUSG00000057777	3	86349503	86352205
Dclk2	ENSMUSG00000028078	3	86590073	86724803
U1	ENSMUSG00000064872	3	86734665	86734824
Cd1d2	ENSMUSG00000041750	3	86790508	86793455
Cd1d1	ENSMUSG00000028076	3	86799756	86803363
Kirrel	ENSMUSG00000041734	3	86882515	86978669
SNORA17	ENSMUSG00000077672	3	86870815	86870946
Gm2442	ENSMUSG00000091938	4	41941480	41943464
Gm10596	ENSMUSG00000073880	4	41954088	41955014
Gm3893	ENSMUSG00000078744	4	41961930	41963010
Gm13304	ENSMUSG00000073878	4	41985540	41986640
Gm13306	ENSMUSG00000073877	4	42024159	42029562
Gm13305	ENSMUSG00000073876	4	42029565	42039326
1700045I11Rik	ENSMUSG00000091473	4	42041568	42042058
Gm10595	ENSMUSG00000073875	4	42090151	42090576
Gm10931	ENSMUSG00000078363	4	42214615	42216999
Gm1987	ENSMUSG00000078739	4	42231045	42232176
Gm2023	ENSMUSG00000078736	4	42248504	42250497
Gm10930	ENSMUSG00000078362	4	42285129	42290096
Gm2500	ENSMUSG00000078361	4	42336528	42337018
Gm2002	ENSMUSG00000078735	4	42339260	42349021
Gm2506	ENSMUSG00000078734	4	42349017	42354405
Ccl21c	ENSMUSG00000078732	4	42391951	42393082
Gm7819	ENSMUSG00000078731	4	42415576	42416656
Gm10929	ENSMUSG00000078360	4	42423572	42424498
Gm10594	ENSMUSG00000073873	4	42472325	42472750
4933409K07Rik	ENSMUSG00000073874	4	42473137	42474846
Gm2542	ENSMUSG00000078727	4	42536112	42541707
Gm10592	ENSMUSG00000073871	4	42594227	42595153
Gm2163	ENSMUSG00000078725	4	42602069	42603149
Gm10591	ENSMUSG00000073869	4	42625653	42626784
Ccl27b	ENSMUSG00000066202	4	42664149	42669537
Il11ra2	ENSMUSG00000066201	4	42668807	42679295
Gm9969	ENSMUSG00000055406	4	42681536	42682026
Gm10590	ENSMUSG00000073868	4	42728458	42733425
4930578G10Rik	ENSMUSG00000054885	4	42749077	42859120
Ccl19	ENSMUSG00000071005	4	42768057	42770109
Ccl21a	ENSMUSG00000071003	4	42786392	42787525
Gm12394	ENSMUSG00000078722	4	42795460	42869643
Gm12429	ENSMUSG00000078721	4	42860943	42866760
BC049635	ENSMUSG00000050141	4	42880876	42887106
N28178	ENSMUSG00000036062	4	42929532	42957624
Dnajb5	ENSMUSG00000036052	4	42962686	42972297
1700022I11Rik	ENSMUSG00000028451	4	42982818	42996511
Vcp	ENSMUSG00000028452	4	42992835	43013379
Fancg	ENSMUSG00000028453	4	43015215	43023378
Pigo	ENSMUSG00000028454	4	43030507	43038691
Stoml2	ENSMUSG00000028455	4	43040562	43044582
B230312A22Rik	ENSMUSG00000036002	4	43045286	43059092
Unc13b	ENSMUSG00000028456	4	43071825	43277745
Atp8b5	ENSMUSG00000028457	4	43280031	43386705
Rusc2	ENSMUSG00000035969	4	43394851	43439960
Fam166b	ENSMUSG00000042788	4	43439891	43442006
Tesk1	ENSMUSG00000028458	4	43454811	43460936
Cd72	ENSMUSG00000028459	4	43459334	43467500
Sit1	ENSMUSG00000028460	4	43494953	43496606
Ccdc107	ENSMUSG00000028461	4	43505772	43508793
E130306D19Rik	ENSMUSG00000051517	4	43509014	43512567
Car9	ENSMUSG00000028463	4	43519838	43526601
Tpm2	ENSMUSG00000028464	4	43527583	43536637
Tln1	ENSMUSG00000028465	4	43544391	43575563
Creb3	ENSMUSG00000028466	4	43575204	43579932
Gba2	ENSMUSG00000028467	4	43579800	43591745
Rgp1	ENSMUSG00000028468	4	43591587	43600359
Msmp	ENSMUSG00000078719	4	43596088	43597366
Npr2	ENSMUSG00000028469	4	43644807	43664116
Spag8	ENSMUSG00000066196	4	43664207	43666466
Hint2	ENSMUSG00000028470	4	43667099	43669338
4930412F15Rik	ENSMUSG00000043633	4	43672494	43682017
Tmem8b	ENSMUSG00000078716	4	43681843	43705540
Olfr70	ENSMUSG00000050215	4	43707872	43713679
Olfr71	ENSMUSG00000046450	4	43718500	43723103
Hrct1	ENSMUSG00000071001	4	43740070	43741511
Olfr159	ENSMUSG00000044801	4	43782922	43783881
Olfr156	ENSMUSG00000059448	4	43833207	43834305
Olfr157	ENSMUSG00000059101	4	43847624	43849389
Olfr155	ENSMUSG00000071000	4	43864437	43868335
Reck	ENSMUSG00000028476	4	43888402	43957678
Gm17599	ENSMUSG00000091065	4	43043871	43045354
Olfr269-ps1	ENSMUSG00000083417	4	43780348	43780649
Olfr29-ps1	ENSMUSG00000081420	4	43794253	43795200
Gm12492	ENSMUSG00000081329	4	43811768	43813127
Gm16972	ENSMUSG00000086983	4	43058906	43066125
Gm3892	ENSMUSG00000073881	4	41925875	41960431
Gm13299	ENSMUSG00000087577	4	41992336	42024158
Ccl19-ps3	ENSMUSG00000084036	4	42003282	42004894
Gm17167	ENSMUSG00000091542	4	42077721	42106036
Gm13301	ENSMUSG00000083929	4	42087631	42104185
Gm13300	ENSMUSG00000081989	4	42104736	42107058
Gm5859	ENSMUSG00000073879	4	42107582	42109905
Gm17081	ENSMUSG00000090338	4	42110448	42110925
Gm7819	ENSMUSG00000078729	4	42418155	42452715
Gm13309	ENSMUSG00000083726	4	42435300	42436901
Gm10593	ENSMUSG00000073872	4	42566010	42600570
Gm12395	ENSMUSG00000085910	4	42750125	42751626
Gm12454	ENSMUSG00000087142	4	43517300	43521619
Gm12472	ENSMUSG00000085351	4	43600944	43621627
Gm12473	ENSMUSG00000086043	4	43644411	43654405
Gm12481	ENSMUSG00000043770	4	43676833	43677211
5430416O09Rik	ENSMUSG00000028475	4	43742906	43747406
A630077J23Rik	ENSMUSG00000086864	4	43768995	43772336
5S_rRNA	ENSMUSG00000088947	4	43705558	43705689
AL732626.1	ENSMUSG00000092675	4	43644297	43644429
U7	ENSMUSG00000089028	4	43214021	43214085
RNase_MRP	ENSMUSG00000088088	4	43505660	43505930
SNORA17	ENSMUSG00000077552	4	43149371	43149500
Glipr2	ENSMUSG00000028480	4	43970273	43991990
Ccin	ENSMUSG00000070999	4	43996376	43998405
Clta	ENSMUSG00000028478	4	44017324	44045718
Gne	ENSMUSG00000028479	4	44046947	44097049
Rnf38	ENSMUSG00000035696	4	44139082	44246661
Melk	ENSMUSG00000035683	4	44313748	44377547
Pax5	ENSMUSG00000014030	4	44544017	44724318
Gm12503	ENSMUSG00000087326	4	44105504	44122183
Gm12504	ENSMUSG00000084274	4	44134765	44136995
Gm12677	ENSMUSG00000081127	4	44326299	44326930
Gm12455	ENSMUSG00000083803	4	44395794	44396209
Mir5106	ENSMUSG00000092677	4	44234067	44234139
SNORA17	ENSMUSG00000077587	4	44425341	44425467
U1	ENSMUSG00000088532	4	44094161	44094272
Palm2	ENSMUSG00000090053	4	57447119	57724888
Gm20459	ENSMUSG00000089945	4	57581051	57909854
Akap2	ENSMUSG00000038729	4	57730529	57909854
D630039A03Rik	ENSMUSG00000052117	4	57921355	57929169
Txn1	ENSMUSG00000028367	4	57956245	57969283
Txndc8	ENSMUSG00000038709	4	57996899	58021996
Svep1	ENSMUSG00000028369	4	58055314	58219731
Musk	ENSMUSG00000057280	4	58298834	58390290
Lpar1	ENSMUSG00000038668	4	58448127	58566770
Olfr267	ENSMUSG00000043385	4	58797651	58798594
AI314180	ENSMUSG00000050812	4	58811783	58925621
Zkscan16	ENSMUSG00000038630	4	58956500	58971227
Ptgr1	ENSMUSG00000028378	4	58978311	58999991
Dnajc25	ENSMUSG00000070972	4	59007934	59038445
Gm20503	ENSMUSG00000092345	4	59016082	59054760
Gng10	ENSMUSG00000038607	4	59047960	59054775
AI481877	ENSMUSG00000038598	4	59056625	59151855
Ugcg	ENSMUSG00000028381	4	59202129	59235705
Susd1	ENSMUSG00000038578	4	59327555	59451505
1700042G15Rik	ENSMUSG00000087044	4	57373740	57377164
Gm12537	ENSMUSG00000078696	4	57383645	57384897
Gm12538	ENSMUSG00000081540	4	57426583	57427068
Gm12539	ENSMUSG00000081615	4	57468433	57470421
Gm12526	ENSMUSG00000073846	4	57770611	57776773
Gm12577	ENSMUSG00000083834	4	58496124	58496697
Gm12578	ENSMUSG00000081186	4	58602636	58603052
Gm12579	ENSMUSG00000083145	4	58623930	58624712
Gm12580	ENSMUSG00000086470	4	58661264	58671464
Gm12593	ENSMUSG00000081432	4	59103059	59103801
Gm12594	ENSMUSG00000086660	4	59147940	59150326
Rpsa-ps11	ENSMUSG00000082978	4	59175140	59176028
Gm12596	ENSMUSG00000086952	4	59272923	59276141
Gm17243	ENSMUSG00000092061	4	58191119	58219507
Mir3095	ENSMUSG00000093293	4	58453884	58453970
AL805972.1	ENSMUSG00000092753	4	58950897	58950981
U6	ENSMUSG00000089286	4	57775479	57775582
U6	ENSMUSG00000064752	4	57890261	57890367
Psmb2	ENSMUSG00000028837	4	126354874	126386958
Tfap2e	ENSMUSG00000042477	4	126393250	126413484
Ncdn	ENSMUSG00000028833	4	126420994	126430682
AU040320	ENSMUSG00000028830	4	126430788	126547314
Zmym4	ENSMUSG00000042446	4	126539069	126645379
Sfpq	ENSMUSG00000028820	4	126698568	126714257
Zmym1	ENSMUSG00000043872	4	126724338	126738396
Zmym6	ENSMUSG00000042408	4	126754627	126801616
Gm12942	ENSMUSG00000070737	4	126800935	126806888
Dlgap3	ENSMUSG00000042388	4	126846448	126914266
BC003266	ENSMUSG00000042380	4	126921028	126925053
Gja4	ENSMUSG00000050234	4	126988665	126991283
Gjb3	ENSMUSG00000042367	4	127002479	127008088
Gjb4	ENSMUSG00000046623	4	127028330	127031325
Gjb5	ENSMUSG00000042357	4	127032053	127035425
CK137956	ENSMUSG00000028813	4	127604836	127648195
Csmd2	ENSMUSG00000028804	4	127665101	128244903
Hmgb4	ENSMUSG00000048686	4	127937457	127938139
Zscan20	ENSMUSG00000061894	4	128260783	128287342
Tlr12	ENSMUSG00000062545	4	128292690	128295863
Phc2	ENSMUSG00000028796	4	128331982	128430125
Gm12937	ENSMUSG00000082498	4	126472717	126473659
Gm12939	ENSMUSG00000081609	4	126660683	126660847
Gm12940	ENSMUSG00000085334	4	126710975	126726642
Gm12941	ENSMUSG00000084088	4	126723627	126723846
Gm12944	ENSMUSG00000084149	4	126733506	126733968
Gm12943	ENSMUSG00000082220	4	126818523	126818732
Gm12948	ENSMUSG00000082047	4	126974028	126974709
Gm12947	ENSMUSG00000079998	4	127085623	127086042
4930471C06Rik	ENSMUSG00000086138	4	127152092	127154084
1700080G11Rik	ENSMUSG00000086771	4	127208866	127210129
A630031M04Rik	ENSMUSG00000087470	4	127222345	127247746
1700112K13Rik	ENSMUSG00000087510	4	127487882	127489417
4930465A12Rik	ENSMUSG00000087459	4	127810767	127841503
4930546G22Rik	ENSMUSG00000085717	4	127938288	127940234
Gm12958	ENSMUSG00000084891	4	128314715	128315691
U6	ENSMUSG00000088982	4	126785710	126785815
SNORA17	ENSMUSG00000088984	4	126538224	126538356
AL606908.1	ENSMUSG00000092839	4	126508708	126509002
SNORA17	ENSMUSG00000077780	4	126495260	126495389
U6	ENSMUSG00000087987	4	126961975	126962077
A3galt2	ENSMUSG00000028794	4	128432608	128446542
Zfp362	ENSMUSG00000028799	4	128450332	128483289
Trim62	ENSMUSG00000041000	4	128560824	128588572
Adc	ENSMUSG00000028789	4	128607477	128639686
Ak2	ENSMUSG00000028792	4	128669202	128688773
Gm12968	ENSMUSG00000085701	4	128523441	128550942
Gm12969	ENSMUSG00000084011	4	128545637	128546640
Gm15904	ENSMUSG00000085961	4	128613249	128617439
1700086P04Rik	ENSMUSG00000085085	4	128727341	128735227
Rnf19b	ENSMUSG00000028793	4	128735515	128763130
Tmem54	ENSMUSG00000028786	4	128782792	128788870
Hpca	ENSMUSG00000028785	4	128788814	128799280
Fndc5	ENSMUSG00000001334	4	128814243	128821837
S100pbp	ENSMUSG00000040928	4	128825249	128866971
Gm15906	ENSMUSG00000087416	4	128812335	128814154
Yars	ENSMUSG00000028811	4	128867004	128896851
C77080	ENSMUSG00000050390	4	128896822	128938648
snoU13	ENSMUSG00000088921	4	128896701	128896788
Gm12976	ENSMUSG00000087575	4	128939209	128942254
Angptl7	ENSMUSG00000028989	4	147869292	147874569
Exosc10	ENSMUSG00000017264	4	147932538	147956510
Srm	ENSMUSG00000006442	4	147965612	147969102
Masp2	ENSMUSG00000028979	4	147976663	147989608
Tardbp	ENSMUSG00000041459	4	147986491	148001128
Gm13151	ENSMUSG00000078498	4	146679783	146707843
Gm13145	ENSMUSG00000078497	4	146735412	146765113
Gm13152	ENSMUSG00000078496	4	146866526	146887595
Gm16503	ENSMUSG00000078160	4	146914327	146917609
Gm13154	ENSMUSG00000065999	4	146927386	146959307
2610305D13Rik	ENSMUSG00000066000	4	146986046	147052416
Zfp534	ENSMUSG00000062518	4	147047611	147076662
Gm13157	ENSMUSG00000078495	4	147128083	147183895
Zfp933	ENSMUSG00000059423	4	147197095	147222475
Miip	ENSMUSG00000029022	4	147234887	147242925
Fv1	ENSMUSG00000070583	4	147243088	147244467
Mfn2	ENSMUSG00000029020	4	147247708	147278813
Plod1	ENSMUSG00000019055	4	147283862	147310876
2510039O18Rik	ENSMUSG00000044496	4	147315004	147321423
Nppb	ENSMUSG00000029019	4	147359897	147361314
Nppa	ENSMUSG00000041616	4	147374831	147376188
Clcn6	ENSMUSG00000029016	4	147378368	147412930
Mthfr	ENSMUSG00000029009	4	147413186	147433660
Agtrap	ENSMUSG00000029007	4	147451170	147462140
2610109H07Rik	ENSMUSG00000029005	4	147472546	147504807
Mad2l2	ENSMUSG00000029003	4	147504493	147519808
Fbxo6	ENSMUSG00000055401	4	147519825	147526249
Fbxo44	ENSMUSG00000029001	4	147526909	147534591
Fbxo2	ENSMUSG00000041556	4	147534730	147540533
Ptchd2	ENSMUSG00000041544	4	147614373	147662074
Gm572	ENSMUSG00000070577	4	148017426	148045681
Casz1	ENSMUSG00000028977	4	148178538	148328998
Pex14	ENSMUSG00000028975	4	148334644	148473985
Dffa	ENSMUSG00000028974	4	148478255	148494756
Cort	ENSMUSG00000028971	4	148499143	148500872
Apitd1	ENSMUSG00000073705	4	148501230	148511738
Pgd	ENSMUSG00000028961	4	148524100	148540880
Kif1b	ENSMUSG00000063077	4	148550428	148681802
Gm16889	ENSMUSG00000084976	4	146392344	146866310
Gm17317	ENSMUSG00000091833	4	146510387	146831128
Ubiad1	ENSMUSG00000047719	4	147808604	147818880
Mtor	ENSMUSG00000028991	4	147822720	147931792
Gm13147	ENSMUSG00000087207	4	146604393	146633447
Gm13158	ENSMUSG00000081627	4	146641482	146642217
Gm13135	ENSMUSG00000082925	4	146650085	146653205
Gm13144	ENSMUSG00000082150	4	146655555	146655899
Gm8178	ENSMUSG00000081140	4	146753038	146753683
Gm13161	ENSMUSG00000082248	4	146817580	146818138
Gm15951	ENSMUSG00000081301	4	146894577	146894976
Gm13141	ENSMUSG00000082599	4	146901828	146902283
Gm13155	ENSMUSG00000081371	4	146998349	146998994
Gm16211	ENSMUSG00000086130	4	147042627	147044963
Gm13137	ENSMUSG00000082944	4	147106897	147107241
Gm13136	ENSMUSG00000081179	4	147109586	147112535
Gm13148	ENSMUSG00000083642	4	147119926	147120670
RP23-406N5.8	ENSMUSG00000093594	4	147156428	147183949
Rps19-ps3	ENSMUSG00000080059	4	147195886	147196335
Gm13156	ENSMUSG00000083340	4	147267782	147268102
Gm13054	ENSMUSG00000086806	4	147375200	147378123
Gm13207	ENSMUSG00000083473	4	147405663	147406435
Gm13202	ENSMUSG00000081726	4	147442140	147442601
Gm13201	ENSMUSG00000078494	4	147445716	147449529
Gm13206	ENSMUSG00000087027	4	147680962	147690678
Gm13200	ENSMUSG00000086326	4	147730488	147733569
Gm13204	ENSMUSG00000082860	4	147943165	147943985
Gm13209	ENSMUSG00000087217	4	147958830	147960116
Gm13203	ENSMUSG00000087273	4	148087812	148090690
Gm15969	ENSMUSG00000086766	4	148287620	148288433
Gm13205	ENSMUSG00000086606	4	148321601	148323023
Gm17029	ENSMUSG00000086740	4	148334406	148358780
Gm9506	ENSMUSG00000081086	4	148470492	148470811
Rpsa-ps12	ENSMUSG00000080746	4	148516541	148517576
AL607145.1	ENSMUSG00000076356	4	148239070	148239159
U6	ENSMUSG00000088625	4	147929806	147929913
U1	ENSMUSG00000064648	4	147817443	147817594
U6	ENSMUSG00000089081	4	147913236	147913339
Ube4b	ENSMUSG00000028960	4	148702525	148800858
Rbp7	ENSMUSG00000028996	4	148823796	148829087
Nmnat1	ENSMUSG00000028992	4	148841681	148859311
Lzic	ENSMUSG00000028990	4	148859338	148870777
Ctnnbip1	ENSMUSG00000028988	4	148892345	148940546
Clstn1	ENSMUSG00000039953	4	148960577	149023008
Pik3cd	ENSMUSG00000039936	4	149023277	149076680
Tmem201	ENSMUSG00000044700	4	149089484	149112153
Slc25a33	ENSMUSG00000028982	4	149118145	149148386
1700121F15Rik	ENSMUSG00000085286	4	148708748	148710006
Gm13069	ENSMUSG00000085807	4	148712196	148712640
A930028C08Rik	ENSMUSG00000085819	4	148721994	148739386
Gm13072	ENSMUSG00000070572	4	148831438	148831815
Gm13097	ENSMUSG00000087198	4	148852775	148857640
Gm13071	ENSMUSG00000083811	4	148874742	148875117
Gm13066	ENSMUSG00000086949	4	148939729	148941899
Gm13068	ENSMUSG00000085403	4	149122627	149123716
AL645645.1	ENSMUSG00000093403	4	148911972	148912031
U6	ENSMUSG00000084646	4	148891288	148891391
Rab28	ENSMUSG00000029128	5	42016215	42099394
Nkx3-2	ENSMUSG00000049691	5	42152404	42155735
Bod1l	ENSMUSG00000061755	5	42178781	42235407
Gm2810	ENSMUSG00000082938	5	40719677	40720666
U2	ENSMUSG00000089393	5	40796989	40797168
Gm16223	ENSMUSG00000067285	5	42459199	42608037
Gm7271	ENSMUSG00000091204	5	76913356	76945609
Exoc1	ENSMUSG00000036435	5	76958336	76999319
Cep135	ENSMUSG00000036403	5	77017723	77075491
Gm10430	ENSMUSG00000072855	5	77085537	77087380
C530008M17Rik	ENSMUSG00000036377	5	77086708	77302579
Aasdh	ENSMUSG00000055923	5	77302684	77334539
Ppat	ENSMUSG00000029246	5	77342274	77380603
Paics	ENSMUSG00000029247	5	77380332	77396534
Srp72	ENSMUSG00000036323	5	77403708	77428962
Arl9	ENSMUSG00000063820	5	77433080	77439631
1700023E05Rik	ENSMUSG00000029248	5	77445048	77490554
Hopx	ENSMUSG00000059325	5	77515468	77544186
Gm15831	ENSMUSG00000085858	5	77545835	77551373
Spink2	ENSMUSG00000053030	5	77634132	77640496
Rest	ENSMUSG00000029249	5	77694516	77715457
Noa1	ENSMUSG00000036285	5	77723199	77739109
Polr2b	ENSMUSG00000029250	5	77739172	77778349
Igfbp7	ENSMUSG00000036256	5	77778265	77837070
Gm7494	ENSMUSG00000083874	5	77171098	77171538
2310040G07Rik	ENSMUSG00000072852	5	77357393	77376783
1700112J05Rik	ENSMUSG00000086632	5	77435474	77447888
Gm15830	ENSMUSG00000087541	5	77523557	77531328
Pea15b	ENSMUSG00000047652	5	77940293	77940676
Mthfr-ps1	ENSMUSG00000044058	5	78902910	78903760
Mir5098	ENSMUSG00000093061	5	77701782	77701863
SNORA17	ENSMUSG00000089415	5	78098749	78098871
snoU13	ENSMUSG00000089567	5	77520753	77520856
SNORA17	ENSMUSG00000077178	5	79208884	79209019
Alb	ENSMUSG00000029368	5	90889915	90905629
Afp	ENSMUSG00000054932	5	90919740	90937933
Afm	ENSMUSG00000029369	5	90947958	90982569
5830473C10Rik	ENSMUSG00000070690	5	90990244	91007024
Rassf6	ENSMUSG00000029370	5	91032102	91069513
Cxcl5	ENSMUSG00000029371	5	91188325	91190651
Ppbp	ENSMUSG00000029372	5	91197544	91199086
Pf4	ENSMUSG00000029373	5	91201461	91202407
Cxcl3	ENSMUSG00000029379	5	91215129	91217112
Cxcl15	ENSMUSG00000029375	5	91223560	91232093
Cxcl1	ENSMUSG00000029380	5	91320267	91322141
Cxcl2	ENSMUSG00000058427	5	91332897	91334935
Mthfd2l	ENSMUSG00000029376	5	91360222	91450386
Epgn	ENSMUSG00000035020	5	91456490	91464241
Ereg	ENSMUSG00000029377	5	91503643	91522675
Areg	ENSMUSG00000029378	5	91568641	91577458
Btc	ENSMUSG00000082361	5	91786287	91831939
Parm1	ENSMUSG00000034981	5	91946641	92055920
Rchy1	ENSMUSG00000029397	5	92377930	92392094
Thap6	ENSMUSG00000060466	5	92392359	92401068
Gm1045	ENSMUSG00000055801	5	92416501	92419330
Cdkl2	ENSMUSG00000029403	5	92435100	92472068
G3bp2	ENSMUSG00000029405	5	92481172	92512761
Uso1	ENSMUSG00000029407	5	92566964	92631820
U90926	ENSMUSG00000029409	5	92638922	92644434
Ppef2	ENSMUSG00000029410	5	92656000	92682185
Naaa	ENSMUSG00000029413	5	92686685	92707196
Sdad1	ENSMUSG00000029415	5	92713036	92739050
Cxcl9	ENSMUSG00000029417	5	92750357	92757105
Art3	ENSMUSG00000034842	5	92760853	92843654
Cxcl10	ENSMUSG00000034855	5	92775664	92777915
Nup54	ENSMUSG00000034826	5	92844566	92864245
Gm15710	ENSMUSG00000084111	5	91701001	92569955
Cxcl11	ENSMUSG00000060183	5	92788570	92794511
Gm2673	ENSMUSG00000082068	5	92792930	92794537
Gm9793	ENSMUSG00000092011	5	92472090	92484986
AC105995.1	ENSMUSG00000093082	5	91225212	91225281
SNORA57	ENSMUSG00000084745	5	92622348	92622491
U6atac	ENSMUSG00000088623	5	92731200	92731318
5S_rRNA	ENSMUSG00000088949	5	92547203	92547309
7SK	ENSMUSG00000088102	5	92411731	92412006
U6	ENSMUSG00000064533	5	91646924	91647030
SCARNA4	ENSMUSG00000088777	5	92858811	92858954
SCARNA23	ENSMUSG00000088712	5	92485090	92485218
5S_rRNA	ENSMUSG00000088075	5	91322406	91322522
AC122438.1	ENSMUSG00000093609	5	92540374	92540444
Vmn2r16	ENSMUSG00000092080	5	109759400	109793500
Vmn2r17	ENSMUSG00000091879	5	109849032	109882406
Crlf2	ENSMUSG00000033467	5	109983730	109988012
5430403G16Rik	ENSMUSG00000072763	5	110103564	110120060
4930522L14Rik	ENSMUSG00000072762	5	110165009	110180905
Gm15446	ENSMUSG00000090015	5	110352419	110372955
Zfp932	ENSMUSG00000066613	5	110425540	110439430
Gm17655	ENSMUSG00000090963	5	110475251	110475505
Plcxd1	ENSMUSG00000064247	5	110528988	110534972
Gtpbp6	ENSMUSG00000033434	5	110532994	110537216
Zfp605	ENSMUSG00000023284	5	110539111	110560756
Chfr	ENSMUSG00000014668	5	110564859	110600991
Golga3	ENSMUSG00000029502	5	110605720	110655489
Ankle2	ENSMUSG00000029501	5	110660060	110685666
Pgam5	ENSMUSG00000029500	5	110688149	110698932
Pxmp2	ENSMUSG00000029499	5	110703301	110715205
Pole	ENSMUSG00000007080	5	110715325	110766493
P2rx2	ENSMUSG00000029503	5	110768831	110772168
Gm1679	ENSMUSG00000072754	5	110783115	110785106
Fbrsl1	ENSMUSG00000043323	5	110790773	110877522
Galnt9	ENSMUSG00000033316	5	110973364	111050401
Noc4l	ENSMUSG00000033294	5	111077437	111082436
Ddx51	ENSMUSG00000029504	5	111082470	111089515
Ep400	ENSMUSG00000029505	5	111093392	111199736
Pus1	ENSMUSG00000029507	5	111202686	111209678
Ulk1	ENSMUSG00000029512	5	111213507	111239116
Hscb	ENSMUSG00000043510	5	111258089	111268796
Chek2	ENSMUSG00000029521	5	111269036	111303152
Gm17724	ENSMUSG00000090661	5	110814854	110817092
1010001B22Rik	ENSMUSG00000091434	5	110424530	110425417
Gm16739	ENSMUSG00000085131	5	110351668	110352500
Gm7171	ENSMUSG00000093663	5	109825349	109831111
Gm8488	ENSMUSG00000093688	5	109956479	109958489
Gm8508	ENSMUSG00000049477	5	110186541	110186950
Gm15484	ENSMUSG00000081865	5	110547041	110547868
Gm15787	ENSMUSG00000086247	5	110583419	110605523
Gm15788	ENSMUSG00000087439	5	110691180	110706286
Gm15791	ENSMUSG00000081256	5	110757223	110757541
Gm15792	ENSMUSG00000085606	5	110760225	110762222
A630023P12Rik	ENSMUSG00000048215	5	110943942	110954999
Gm15559	ENSMUSG00000086401	5	111199968	111208279
Ttc28	ENSMUSG00000033209	5	111308822	111718800
Gm15989	ENSMUSG00000081104	5	111334263	111334760
Gm15988	ENSMUSG00000083771	5	111437499	111437865
Gm16728	ENSMUSG00000087494	5	110688182	110698866
Gm17598	ENSMUSG00000091066	5	111208901	111210146
U6	ENSMUSG00000065775	5	111106143	111106249
SNORA49	ENSMUSG00000077254	5	111121068	111121200
U6	ENSMUSG00000065071	5	111186104	111186210
Mir701	ENSMUSG00000076163	5	111433163	111433271
SNORA70	ENSMUSG00000087722	5	110757051	110757202
Pitpnb	ENSMUSG00000050017	5	111759783	111817379
Mn1	ENSMUSG00000070576	5	111846382	111886053
C130026L21Rik	ENSMUSG00000052848	5	112010442	112016965
Cryba4	ENSMUSG00000066975	5	112675513	112681538
Crybb1	ENSMUSG00000029343	5	112684835	112698605
Tpst2	ENSMUSG00000029344	5	112705711	112744381
Tfip11	ENSMUSG00000029345	5	112755378	112767093
Srrd	ENSMUSG00000029346	5	112766412	112772060
Hps4	ENSMUSG00000042328	5	112772103	112807434
E130006D01Rik	ENSMUSG00000085271	5	112163304	112190745
Gm16019	ENSMUSG00000085919	5	112171869	112177196
Miat	ENSMUSG00000086878	5	112642248	112657968
Gm6583	ENSMUSG00000051503	5	112782821	112785053
Asphd2	ENSMUSG00000029348	5	112814468	112821233
RP23-459I1.1	ENSMUSG00000093637	5	112803389	112806659
Sgsm1	ENSMUSG00000042216	5	113672240	113739806
Aym1	ENSMUSG00000053873	5	113786314	113786841
Wscd2	ENSMUSG00000063430	5	113919467	114039679
Cmklr1	ENSMUSG00000042190	5	114062363	114100435
1700069L16Rik	ENSMUSG00000042184	5	114142431	114174781
Ficd	ENSMUSG00000053334	5	114185791	114190609
Sart3	ENSMUSG00000018974	5	114192455	114221658
Gm3511	ENSMUSG00000069196	5	114217108	114217421
Iscu	ENSMUSG00000025825	5	114222757	114228297
Tmem119	ENSMUSG00000054675	5	114243738	114250525
Selplg	ENSMUSG00000048163	5	114267807	114280510
Coro1c	ENSMUSG00000004530	5	114292445	114358767
Ssh1	ENSMUSG00000042121	5	114387103	114443903
Dao	ENSMUSG00000042096	5	114453712	114475458
Svop	ENSMUSG00000042078	5	114476919	114541579
Usp30	ENSMUSG00000029592	5	114550342	114573515
Alkbh2	ENSMUSG00000044339	5	114573935	114578227
Ung	ENSMUSG00000029591	5	114580395	114589332
Acacb	ENSMUSG00000042010	5	114596544	114700770
Foxn4	ENSMUSG00000042002	5	114704173	114723816
Myo1h	ENSMUSG00000066952	5	114764950	114814585
Kctd10	ENSMUSG00000001098	5	114813576	114830524
Ube3b	ENSMUSG00000029577	5	114830637	114871177
Mmab	ENSMUSG00000029575	5	114881043	114894068
Mvk	ENSMUSG00000041939	5	114894278	114910600
BC057022	ENSMUSG00000041930	5	115018025	115063229
Trpv4	ENSMUSG00000014158	5	115072161	115108430
Gltp	ENSMUSG00000011884	5	115119412	115140993
Tchp	ENSMUSG00000002486	5	115157769	115172336
Git2	ENSMUSG00000041890	5	115177416	115225526
Ankrd13a	ENSMUSG00000041870	5	115224686	115256209
1500011B03Rik	ENSMUSG00000072694	5	115258205	115263985
Gm20499	ENSMUSG00000092252	5	115259045	115273469
1500011B03Rik	ENSMUSG00000092279	5	115262802	115263954
2610524H06Rik	ENSMUSG00000092486	5	115271944	115273477
Gm13821	ENSMUSG00000078186	5	115292358	115292871
4930519G04Rik	ENSMUSG00000029564	5	115303673	115333668
Gm9936	ENSMUSG00000054123	5	115305767	115308691
Oasl2	ENSMUSG00000029561	5	115346943	115362243
Oasl1	ENSMUSG00000041827	5	115373249	115387924
2210016L21Rik	ENSMUSG00000029559	5	115392167	115399792
Hnf1a	ENSMUSG00000029556	5	115398370	115421076
Sppl3	ENSMUSG00000029550	5	115461146	115548799
Gm10401	ENSMUSG00000072693	5	115547698	115548304
Acads	ENSMUSG00000029545	5	115560308	115569355
Unc119b	ENSMUSG00000046562	5	115572559	115584984
Mlec	ENSMUSG00000048578	5	115592990	115608188
Cabp1	ENSMUSG00000029544	5	115618698	115644390
Wscd2	ENSMUSG00000085571	5	113919772	113919960
Gm15736	ENSMUSG00000085713	5	114094972	114095691
Gm17122	ENSMUSG00000090458	5	114292610	114293125
Gm16108	ENSMUSG00000089734	5	114515470	114539475
Gm13784	ENSMUSG00000084243	5	114687185	114687934
Gm13789	ENSMUSG00000085590	5	114813424	114815366
Gm13790	ENSMUSG00000086302	5	115001298	115004025
4930515G01Rik	ENSMUSG00000092183	5	115223746	115224992
Gm13820	ENSMUSG00000078187	5	115266974	115267111
Gm13819	ENSMUSG00000082052	5	115278582	115279224
Gm13823	ENSMUSG00000080707	5	115317690	115318034
Gm13822	ENSMUSG00000087477	5	115367327	115373286
Gm13824	ENSMUSG00000086054	5	115418793	115448055
Gm13825	ENSMUSG00000086140	5	115418832	115421409
Gm13827	ENSMUSG00000086167	5	115503430	115503855
Gm13826	ENSMUSG00000072692	5	115552931	115560277
Gm13828	ENSMUSG00000083182	5	115648352	115648714
AC151577.1	ENSMUSG00000093343	5	113690296	113690368
U6	ENSMUSG00000065320	5	114378733	114378813
Pop5	ENSMUSG00000060152	5	115685845	115695360
Rnf10	ENSMUSG00000041740	5	115691421	115722907
Gm13831	ENSMUSG00000083875	5	115713102	115713403
Coq5	ENSMUSG00000041733	5	115729675	115746981
Dynll1	ENSMUSG00000009013	5	115747119	115751008
Srsf9	ENSMUSG00000029538	5	115777186	115783089
Gatc	ENSMUSG00000029536	5	115783251	115791187
Gm13829	ENSMUSG00000082610	5	115741772	115741909
Gm13830	ENSMUSG00000086368	5	115751129	115769217
Triap1	ENSMUSG00000029535	5	115791234	115793578
Cox6a1	ENSMUSG00000041697	5	115795651	115798990
4930401G09Rik	ENSMUSG00000086352	5	115808709	115810132
Gm13832	ENSMUSG00000087292	5	115809087	115872872
Msi1	ENSMUSG00000054256	5	115879608	115905707
4930430O22Rik	ENSMUSG00000057354	5	115886077	115886615
Pla2g1b	ENSMUSG00000029522	5	115916271	115924731
Sirt4	ENSMUSG00000029524	5	115928019	115934734
Pxn	ENSMUSG00000029528	5	115956685	116005996
Rplp0	ENSMUSG00000067274	5	116009476	116013736
Gcn1l1	ENSMUSG00000041638	5	116015263	116072665
Rab35	ENSMUSG00000029518	5	116081938	116097745
Ccdc64	ENSMUSG00000041609	5	116098184	116181630
Gm13836	ENSMUSG00000081282	5	115941900	115942464
Gm13840	ENSMUSG00000086849	5	115965272	115965956
Gm13841	ENSMUSG00000083833	5	116251568	116252219
U4	ENSMUSG00000075998	5	115939468	115939608
U4	ENSMUSG00000075779	5	115940263	115940403
Cit	ENSMUSG00000029516	5	116295287	116458956
Prkab1	ENSMUSG00000029513	5	116463595	116474517
Tmem233	ENSMUSG00000079278	5	116488764	116533253
Ccdc60	ENSMUSG00000043913	5	116574650	116738994
Gm14508	ENSMUSG00000085376	5	116459325	116466114
Gm13842	ENSMUSG00000084992	5	116476420	116479239
Gm17420	ENSMUSG00000090728	5	116482155	116482322
C330018A13Rik	ENSMUSG00000086655	5	116573623	116579119
Gm14507	ENSMUSG00000086122	5	116693715	116704962
Dhx37	ENSMUSG00000029480	5	125894230	125914491
Bri3bp	ENSMUSG00000037905	5	125921938	125941242
Aacs	ENSMUSG00000029482	5	125956184	125997782
Tmem132b	ENSMUSG00000070498	5	126102858	126179143
Tmem132b	ENSMUSG00000029483	5	126259004	126268438
Gm4868	ENSMUSG00000091970	5	126328322	126329110
Tmem132c	ENSMUSG00000034324	5	127722178	128046163
1700085B03Rik	ENSMUSG00000087104	5	127737228	127762004
U6	ENSMUSG00000070220	5	126869918	126870024
U6	ENSMUSG00000084551	5	126994245	126994351
Slc15a4	ENSMUSG00000029416	5	128076034	128113267
Tfr2	ENSMUSG00000029716	5	138011079	138028709
Mospd3	ENSMUSG00000037221	5	138037873	138042286
Pcolce	ENSMUSG00000029718	5	138046331	138055012
Fbxo24	ENSMUSG00000089984	5	138053731	138070230
Lrch4	ENSMUSG00000093445	5	138070349	138082327
Lrch4	ENSMUSG00000029720	5	138070403	138084127
Sap25	ENSMUSG00000079165	5	138082562	138084130
Irs3	ENSMUSG00000047182	5	138084260	138086942
Agfg2	ENSMUSG00000029722	5	138091711	138125954
6430598A04Rik	ENSMUSG00000045348	5	138172111	138182835
Tsc22d4	ENSMUSG00000029723	5	138186958	138209678
Ppp1r35	ENSMUSG00000029725	5	138220077	138221338
Mepce	ENSMUSG00000029726	5	138223134	138227943
Zcwpw1	ENSMUSG00000037108	5	138229026	138263849
Pilra	ENSMUSG00000046245	5	138263180	138277506
Pilrb1	ENSMUSG00000066684	5	138293375	138299277
Pilrb2	ENSMUSG00000066682	5	138307057	138312986
Cyp3a13	ENSMUSG00000029727	5	138334160	138362847
Gjc3	ENSMUSG00000056966	5	138395037	138404187
Azgp1	ENSMUSG00000037053	5	138422749	138431461
Gm4963	ENSMUSG00000063739	5	138434275	138434652
Smok3a	ENSMUSG00000075599	5	138462504	138475893
Smok3b	ENSMUSG00000075598	5	138478452	138491863
Zkscan1	ENSMUSG00000029729	5	138526312	138549050
Zscan21	ENSMUSG00000037017	5	138558131	138575493
Zfp113	ENSMUSG00000037007	5	138580930	138596972
Cops6	ENSMUSG00000019494	5	138602299	138605874
Mcm7	ENSMUSG00000029730	5	138605811	138613650
Ap4m1	ENSMUSG00000019518	5	138613230	138619936
Taf6	ENSMUSG00000036980	5	138619845	138628679
Cnpy4	ENSMUSG00000036968	5	138628713	138635146
Mblac1	ENSMUSG00000049285	5	138635542	138636628
Gm454	ENSMUSG00000089783	5	138644837	138648536
BC055004	ENSMUSG00000047592	5	138667126	138694591
0910001L09Rik	ENSMUSG00000050552	5	138696836	138700626
BC037034	ENSMUSG00000036948	5	138700884	138705280
BC037034	ENSMUSG00000091964	5	138700886	138705274
Gal3st4	ENSMUSG00000075593	5	138706149	138714068
Gpc2	ENSMUSG00000029510	5	138706180	138721233
Stag3	ENSMUSG00000036928	5	138721468	138753621
Gm10874	ENSMUSG00000075591	5	138804947	138829515
Zfp157	ENSMUSG00000036898	5	138882696	138901922
1700123K08Rik	ENSMUSG00000029526	5	139003068	139005922
Zfp68	ENSMUSG00000058291	5	139045844	139060989
A430033K04Rik	ENSMUSG00000056014	5	139064087	139090052
Fam20c	ENSMUSG00000025854	5	139230468	139286031
Pdgfa	ENSMUSG00000025856	5	139451968	139473324
Gm17247	ENSMUSG00000090903	5	139461462	139461950
6330403L08Rik	ENSMUSG00000075585	5	139471010	139476530
Prkar1b	ENSMUSG00000025855	5	139493260	139625955
Heatr2	ENSMUSG00000025857	5	139626177	139662464
Sun1	ENSMUSG00000036817	5	139676591	139725794
Get4	ENSMUSG00000025858	5	139728278	139746005
Adap1	ENSMUSG00000056413	5	139747830	139801576
Cox19	ENSMUSG00000045438	5	139812143	139821187
Cyp2w1	ENSMUSG00000029541	5	139828571	139832987
3110082I17Rik	ENSMUSG00000053553	5	139835693	139936456
Gpr146	ENSMUSG00000044197	5	139853696	139872369
D830046C22Rik	ENSMUSG00000021206	5	139854174	139855213
C130050O18Rik	ENSMUSG00000044092	5	139881234	139891577
Gpr30	ENSMUSG00000053647	5	139899105	139903754
Zfand2a	ENSMUSG00000053581	5	139947165	139960503
Uncx	ENSMUSG00000029546	5	140019448	140079180
Gm16089	ENSMUSG00000081228	5	138056855	138057190
Gm15498	ENSMUSG00000079163	5	138126382	138131979
Gm15753	ENSMUSG00000082088	5	138161582	138162968
Gm15502	ENSMUSG00000083813	5	138337980	138338187
Smok3c	ENSMUSG00000079156	5	138494423	138507767
6330418K02Rik	ENSMUSG00000085227	5	138705271	138707889
Got2-ps1	ENSMUSG00000080935	5	138805488	138806780
Gm5564	ENSMUSG00000046440	5	138946066	138947174
Gm15497	ENSMUSG00000081142	5	139051967	139052517
Gm15672	ENSMUSG00000086873	5	139623530	139626647
Mir93	ENSMUSG00000065527	5	138606751	138606838
Mir339	ENSMUSG00000065593	5	139845604	139845699
U6	ENSMUSG00000065300	5	139919553	139919659
U6	ENSMUSG00000064892	5	138819819	138819925
AC125115.1	ENSMUSG00000092916	5	139047927	139048009
Mir106b	ENSMUSG00000065514	5	138606965	138607046
Mir25	ENSMUSG00000065394	5	138606549	138606632
U4	ENSMUSG00000084469	5	138660965	138661044
Cav2	ENSMUSG00000000058	6	17231185	17239115
Cav1	ENSMUSG00000007655	6	17256335	17291452
Met	ENSMUSG00000009376	6	17413800	17523980
Capza2	ENSMUSG00000015733	6	17586234	17616972
St7	ENSMUSG00000029534	6	17642933	17893025
Wnt2	ENSMUSG00000010797	6	17938940	17980585
Asz1	ENSMUSG00000010796	6	18000964	18059061
Cftr	ENSMUSG00000041301	6	18120687	18272768
Cttnbp2	ENSMUSG00000000416	6	18316478	18465338
Naa38	ENSMUSG00000044155	6	18798579	18805751
Ankrd7	ENSMUSG00000029517	6	18816318	18829586
Gm15581	ENSMUSG00000085264	6	17156823	17335604
Gm13898	ENSMUSG00000086409	6	17660598	17661225
Gm13899	ENSMUSG00000081077	6	17661687	17662941
Gm15593	ENSMUSG00000084203	6	18094734	18095741
Gm15596	ENSMUSG00000082289	6	18106337	18107120
Gm15592	ENSMUSG00000087389	6	18220136	18239048
Gm15595	ENSMUSG00000080767	6	18244271	18245231
Gm15594	ENSMUSG00000084947	6	18374684	18377885
Gm5874	ENSMUSG00000071568	6	18774552	18775058
Gm16854	ENSMUSG00000085607	6	18794220	18797360
U6	ENSMUSG00000064965	6	17386306	17386412
AC027654.1	ENSMUSG00000093271	6	18399271	18399340
U6	ENSMUSG00000065051	6	18677292	18677398
7SK	ENSMUSG00000084650	6	18996837	18997151
Gm17725	ENSMUSG00000091555	6	51329709	51342776
5430402O13Rik	ENSMUSG00000085776	6	50516642	50544864
Gm15055	ENSMUSG00000085412	6	52052948	52062531
Gm8078	ENSMUSG00000081979	6	52068241	52068890
Gm15052	ENSMUSG00000082781	6	52081777	52082045
Gm15051	ENSMUSG00000087658	6	52106901	52112118
5730446D14Rik	ENSMUSG00000056445	6	52115673	52119563
Gm15050	ENSMUSG00000087626	6	52122880	52124058
2700086A05Rik	ENSMUSG00000085696	6	52125216	52165075
9930038K12Rik	ENSMUSG00000092475	6	52178246	52180531
9930038K12Rik	ENSMUSG00000056583	6	52180079	52180529
Hoxa11as	ENSMUSG00000086427	6	52194392	52199798
Gm15053	ENSMUSG00000055408	6	52212769	52217597
5730457N03Rik	ENSMUSG00000086126	6	52258383	52264826
Gm8129	ENSMUSG00000059159	6	52296724	52296939
Gm15054	ENSMUSG00000084282	6	52307538	52307818
Hnrnpa2b1	ENSMUSG00000004980	6	51410433	51419893
Cbx3	ENSMUSG00000029836	6	51420359	51433703
Snx10	ENSMUSG00000038301	6	51473900	51540678
Skap2	ENSMUSG00000059182	6	51809165	51962548
Hoxa1	ENSMUSG00000029844	6	52105366	52108316
Hoxa2	ENSMUSG00000014704	6	52112350	52115412
RP23-103L13.8	ENSMUSG00000093412	6	52113358	52163338
Hoxa3	ENSMUSG00000079560	6	52118509	52163335
5730596B20Rik	ENSMUSG00000056468	6	52127497	52130850
Hoxa4	ENSMUSG00000000942	6	52139670	52141752
Hoxa3	ENSMUSG00000059723	6	52149150	52163335
Hoxa5	ENSMUSG00000038253	6	52151753	52154586
Hoxa6	ENSMUSG00000043219	6	52155430	52161355
Hoxa7	ENSMUSG00000038236	6	52164490	52171853
Hoxa9	ENSMUSG00000038227	6	52173099	52181088
Hoxa10	ENSMUSG00000000938	6	52181196	52190853
Hoxa11	ENSMUSG00000038210	6	52192107	52196213
Hoxa13	ENSMUSG00000038203	6	52207693	52210874
Evx1	ENSMUSG00000005503	6	52263492	52268372
Nfe2l3	ENSMUSG00000029832	6	51382669	51408767
Cycs	ENSMUSG00000063694	6	50512562	50516537
4921507P07Rik	ENSMUSG00000029828	6	50523301	50546631
Gm4782	ENSMUSG00000092012	6	50558636	50560708
Gm8038	ENSMUSG00000091981	6	50569821	50571884
Npvf	ENSMUSG00000029831	6	50600671	50604438
G930045G22Rik	ENSMUSG00000073072	6	50796523	50828078
SNORA17	ENSMUSG00000077357	6	50489903	50490033
Mir148a	ENSMUSG00000065505	6	51219811	51219909
AC153877.1	ENSMUSG00000092936	6	51571631	51571707
Mir196b	ENSMUSG00000065443	6	52180080	52180164
Hibadh	ENSMUSG00000029776	6	52496222	52590383
Tax1bp1	ENSMUSG00000004535	6	52663723	52716774
Jazf1	ENSMUSG00000063568	6	52718791	53018625
SNORA32	ENSMUSG00000064792	6	52589228	52589349
Gm15572	ENSMUSG00000081872	6	52793103	52793695
Gm15573	ENSMUSG00000080759	6	52995878	52996417
SCARNA20	ENSMUSG00000089209	6	52960388	52960526
Gm15631	ENSMUSG00000085067	6	105624749	105627575
Il5ra	ENSMUSG00000005364	6	106660378	106695103
Trnt1	ENSMUSG00000013736	6	106719114	106732468
Crbn	ENSMUSG00000005362	6	106728243	106750068
Cntn4	ENSMUSG00000064293	6	105627654	106649304
SNORA48	ENSMUSG00000089587	6	105182599	105182737
U6	ENSMUSG00000064466	6	106951446	106951552
AC167724.1	ENSMUSG00000093127	6	107398813	107398938
Lrrn1	ENSMUSG00000034648	6	107479779	107520204
Efcab4b	ENSMUSG00000061414	6	127527993	127579956
Prmt8	ENSMUSG00000030350	6	127639029	127719490
Tspan11	ENSMUSG00000030351	6	127837607	127903049
Tspan9	ENSMUSG00000030352	6	127911414	128093612
Gm10010	ENSMUSG00000056771	6	128137864	128150641
Tead4	ENSMUSG00000030353	6	128174306	128250841
Tulp3	ENSMUSG00000001521	6	128271158	128305869
5930416I19Rik	ENSMUSG00000048668	6	128307018	128312929
Foxm1	ENSMUSG00000001517	6	128312985	128325911
4933413G19Rik	ENSMUSG00000079304	6	128325474	128335162
Nrip2	ENSMUSG00000001520	6	128349314	128358950
Itfg2	ENSMUSG00000001518	6	128359462	128374949
Fkbp4	ENSMUSG00000030357	6	128379753	128388695
Pzp	ENSMUSG00000030359	6	128433585	128476738
BC048546	ENSMUSG00000047228	6	128489840	128531624
Klrb1a	ENSMUSG00000030361	6	128559245	128572952
Gm5884	ENSMUSG00000037827	6	128594931	128596409
Clec2j	ENSMUSG00000030363	6	128602456	128607050
Clec2h	ENSMUSG00000030364	6	128612404	128627389
Klrb1	ENSMUSG00000079299	6	128656526	128673064
Klrb1c	ENSMUSG00000030325	6	128728503	128739233
Klrb1b	ENSMUSG00000079298	6	128763724	128776349
BC035044	ENSMUSG00000090164	6	128798062	128841144
Clec2i	ENSMUSG00000030365	6	128837606	128848185
Clec2g	ENSMUSG00000000248	6	128884399	128970537
Klrb1f	ENSMUSG00000030154	6	128995919	129007489
Clec2e	ENSMUSG00000030155	6	129041850	129050934
Klrb1-ps1	ENSMUSG00000079295	6	129066536	129079464
Clec2d	ENSMUSG00000030157	6	129130633	129136552
Cd69	ENSMUSG00000030156	6	129217342	129225387
4922502D21Rik	ENSMUSG00000047720	6	129272183	129281814
Clec12a	ENSMUSG00000053063	6	129292709	129315321
Clec12b	ENSMUSG00000030158	6	129325533	129335521
Clec1a	ENSMUSG00000033082	6	129339308	129402018
Clec1b	ENSMUSG00000030159	6	129347315	129359353
Clec9a	ENSMUSG00000046080	6	129358880	129374780
Clec7a	ENSMUSG00000079293	6	129411611	129422790
Olr1	ENSMUSG00000030162	6	129435264	129457183
D630042F21Rik	ENSMUSG00000030160	6	129462575	129469245
Gm16186	ENSMUSG00000081935	6	128980855	128981694
Clec2f-ps	ENSMUSG00000089728	6	128968600	128970537
2310001H17Rik	ENSMUSG00000085930	6	129158430	129188000
Gm15870	ENSMUSG00000085813	6	127884707	127894857
Rpl18-ps2	ENSMUSG00000053173	6	128263363	128263978
Gm15862	ENSMUSG00000085739	6	128331602	128349758
Gm10069	ENSMUSG00000059659	6	128388775	128425635
Gm8724	ENSMUSG00000058700	6	128480936	128481322
Gm15987	ENSMUSG00000085786	6	128901222	128925047
Gm8778	ENSMUSG00000079223	6	128926884	128927990
BC064078	ENSMUSG00000087150	6	128942979	128958058
Gm16187	ENSMUSG00000082694	6	128955642	128957979
Gm17703	ENSMUSG00000090933	6	128306022	128308857
Gm17395	ENSMUSG00000090617	6	128793804	128796977
AC144778.1	ENSMUSG00000076327	6	128044935	128045044
U7	ENSMUSG00000089590	6	129124838	129124900
7SK	ENSMUSG00000088177	6	127799239	127799537
Gabarapl1	ENSMUSG00000030161	6	129483218	129492349
Klre1	ENSMUSG00000050241	6	129527911	129535842
Klrd1	ENSMUSG00000030165	6	129541800	129548793
Klrk1	ENSMUSG00000030149	6	129560341	129573882
Klrc3	ENSMUSG00000033027	6	129588711	129593355
Klrc2	ENSMUSG00000052736	6	129597514	129610707
Klrc1	ENSMUSG00000030167	6	129616033	129628991
Klri1	ENSMUSG00000067610	6	129647236	129667150
Klri2	ENSMUSG00000043932	6	129679059	129690502
Gm156	ENSMUSG00000071158	6	129716586	129734288
Klra17	ENSMUSG00000014543	6	129781172	129826690
Gm17631	ENSMUSG00000092047	6	129812667	129814411
Klra5	ENSMUSG00000030173	6	129849014	129867668
Klra6	ENSMUSG00000061769	6	129963051	129976972
Klra4	ENSMUSG00000079852	6	129993749	130017289
Klra8	ENSMUSG00000089727	6	130065244	130079916
Gm11082	ENSMUSG00000079282	6	130090299	130093709
Klra9	ENSMUSG00000033024	6	130128771	130285823
Gm11081	ENSMUSG00000079281	6	130131767	130134749
Klra7	ENSMUSG00000067599	6	130168623	130183340
Klra10	ENSMUSG00000072718	6	130219212	130231946
Gm7309	ENSMUSG00000083848	6	129639636	129640216
Gm16242	ENSMUSG00000082069	6	129745488	129763954
Gm15854	ENSMUSG00000083120	6	129922398	129942862
Klra11	ENSMUSG00000072717	6	130032935	130044695
Klra14	ENSMUSG00000072721	6	130099124	130112587
Klra13-ps	ENSMUSG00000030178	6	130241179	130256450
1700101I11Rik	ENSMUSG00000091870	6	129482112	129483290
U6	ENSMUSG00000088238	6	130126771	130126844
U6	ENSMUSG00000089383	6	130031437	130031511
U6	ENSMUSG00000088110	6	129847950	129848023
U6	ENSMUSG00000088003	6	130096899	130096972
Mir680-1	ENSMUSG00000076212	6	129641553	129641661
U6	ENSMUSG00000088426	6	129961855	129961916
U6	ENSMUSG00000088520	6	130063309	130063382
Klra3	ENSMUSG00000067591	6	130273307	130287592
U6	ENSMUSG00000089474	6	130270892	130270965
Klra1	ENSMUSG00000079853	6	130313936	130336892
Gm6584	ENSMUSG00000084204	6	130348290	130357951
Gm15861	ENSMUSG00000082777	6	130351575	130351913
9330104G04Rik	ENSMUSG00000091869	7	17456703	17460235
Gm6065	ENSMUSG00000063830	7	18377923	18378414
Ceacam15	ENSMUSG00000078795	7	17256680	17261054
Ceacam9	ENSMUSG00000007209	7	17307278	17311459
Ap2s1	ENSMUSG00000008036	7	17323759	17334643
Slc1a5	ENSMUSG00000001918	7	17366695	17383623
Fkrp	ENSMUSG00000048920	7	17394619	17400478
Strn4	ENSMUSG00000030374	7	17401238	17426280
Prkd2	ENSMUSG00000041187	7	17428283	17455810
Dact3	ENSMUSG00000078794	7	17460666	17472650
Gng8	ENSMUSG00000063594	7	17477135	17480784
Ptgir	ENSMUSG00000043017	7	17491839	17496254
Calm3	ENSMUSG00000019370	7	17500728	17509463
Pnmal2	ENSMUSG00000070802	7	17530031	17532427
Pnmal1	ENSMUSG00000041141	7	17545144	17547668
Ccdc8	ENSMUSG00000041117	7	17578057	17582864
Ppp5c	ENSMUSG00000003099	7	17589989	17613273
Hif3a	ENSMUSG00000004328	7	17616856	17647776
Psg16	ENSMUSG00000066760	7	17659389	17718799
Ceacam3	ENSMUSG00000053228	7	17735631	17749602
Psg29	ENSMUSG00000023159	7	17788826	17801105
Psg-ps1	ENSMUSG00000090442	7	18257662	18267409
Ceacam5	ENSMUSG00000008789	7	18298601	18346475
Ceacam14	ENSMUSG00000023185	7	18397982	18401012
Gm5155	ENSMUSG00000078793	7	18457116	18504373
Ceacam11	ENSMUSG00000030368	7	18557473	18563905
Ceacam13	ENSMUSG00000057195	7	18595238	18604570
Ceacam12	ENSMUSG00000030366	7	18651278	18663335
Igfl3	ENSMUSG00000066756	7	18761843	18767211
Mill1	ENSMUSG00000054005	7	18830696	18851441
Psg18	ENSMUSG00000003505	7	18931157	18940356
Psg28	ENSMUSG00000030373	7	19007887	19017404
Psg26	ENSMUSG00000070799	7	19059932	19069498
Psg25	ENSMUSG00000070798	7	19105053	19117576
Psg27	ENSMUSG00000070797	7	19141864	19152654
Psg23	ENSMUSG00000074359	7	19191692	19201850
Psg21	ENSMUSG00000070796	7	19232003	19242074
Psg20	ENSMUSG00000063305	7	19259456	19271534
U6	ENSMUSG00000064689	7	17538744	17538850
AC151983.1	ENSMUSG00000076355	7	18771038	18771138
AC151601.1	ENSMUSG00000084614	7	18046672	18046781
AC150681.1	ENSMUSG00000093078	7	17295966	17296036
AC134475.1	ENSMUSG00000093207	7	18602601	18602701
AC138311.2	ENSMUSG00000077108	7	18196115	18196224
AC126443.1	ENSMUSG00000084594	7	18122326	18122435
U6	ENSMUSG00000065313	7	19134434	19134540
AC151412.1	ENSMUSG00000076332	7	19003188	19003282
U7	ENSMUSG00000089483	7	18846813	18846875
AC138311.1	ENSMUSG00000077083	7	18203519	18203628
Gm17574	ENSMUSG00000091384	7	19967569	19978067
Gm17375	ENSMUSG00000092002	7	20182642	20187643
Rsph6a	ENSMUSG00000040866	7	19640039	19659796
Dmwd	ENSMUSG00000030410	7	19661598	19668125
Dmpk	ENSMUSG00000030409	7	19669198	19679170
Six5	ENSMUSG00000040841	7	19679943	19683898
Gm4969	ENSMUSG00000085601	7	19686900	19703717
Fbxo46	ENSMUSG00000050428	7	19705208	19723610
Qpctl	ENSMUSG00000030407	7	19725566	19734545
Snrpd2	ENSMUSG00000040824	7	19735071	19738084
Gipr	ENSMUSG00000030406	7	19742474	19751476
Eml2	ENSMUSG00000040811	7	19761770	19791831
Gpr4	ENSMUSG00000044317	7	19797887	19809525
Opa3	ENSMUSG00000052214	7	19813683	19841892
Vasp	ENSMUSG00000030403	7	19842278	19857166
Ppm1n	ENSMUSG00000030402	7	19862156	19865398
Rtn2	ENSMUSG00000030401	7	19868011	19881513
Fosb	ENSMUSG00000003545	7	19888070	19895394
Ercc1	ENSMUSG00000003549	7	19930127	19941873
Cd3eap	ENSMUSG00000047649	7	19942198	19944832
Ppp1r13l	ENSMUSG00000040734	7	19945098	19963882
Ercc2	ENSMUSG00000030400	7	19967359	19981043
Klc3	ENSMUSG00000040714	7	19979786	19989453
Ckm	ENSMUSG00000030399	7	19996443	20006932
Gm17405	ENSMUSG00000091658	7	19996973	19997621
A930016O22Rik	ENSMUSG00000040705	7	20004161	20006766
Mark4	ENSMUSG00000030397	7	20010816	20043843
Exoc3l2	ENSMUSG00000011263	7	20074405	20082109
Bloc1s3	ENSMUSG00000057667	7	20091163	20093680
Trappc6a	ENSMUSG00000002043	7	20094019	20101494
Nkpd1	ENSMUSG00000060621	7	20104080	20110399
Ppp1r37	ENSMUSG00000051403	7	20116316	20147747
Gemin7	ENSMUSG00000044709	7	20150295	20159172
Gm17370	ENSMUSG00000092034	7	19547764	19550522
Gm17589	ENSMUSG00000090995	7	19883609	19886119
Gm16733	ENSMUSG00000085994	7	20355960	20360752
Gm16266	ENSMUSG00000086533	7	19578902	19586571
1700058P15Rik	ENSMUSG00000089636	7	19843841	19845088
Gm20512	ENSMUSG00000092381	7	20300365	20307080
Gm16175	ENSMUSG00000087206	7	20394958	20397221
Gm16174	ENSMUSG00000087593	7	20401902	20403974
Gm16184	ENSMUSG00000089886	7	20497174	20497746
Gm16251	ENSMUSG00000090075	7	20506078	20512956
Psg22	ENSMUSG00000044903	7	19303439	19312597
Psg19	ENSMUSG00000004542	7	19374474	19383859
Psg17	ENSMUSG00000004540	7	19399286	19406956
Mill2	ENSMUSG00000040987	7	19425315	19444003
Pglyrp1	ENSMUSG00000030413	7	19470039	19475787
Ccdc61	ENSMUSG00000074358	7	19476232	19495764
Nova2	ENSMUSG00000030411	7	19510698	19551031
Nanos2	ENSMUSG00000051965	7	19572873	19574311
Gm10676	ENSMUSG00000074355	7	19574903	19578123
Mypop	ENSMUSG00000048481	7	19576594	19587115
Irf2bp1	ENSMUSG00000044030	7	19589414	19592110
Foxa3	ENSMUSG00000040891	7	19598631	19608887
Sympk	ENSMUSG00000023118	7	19609726	19639967
Tomm40	ENSMUSG00000002984	7	20286662	20300787
Pvrl2	ENSMUSG00000062300	7	20301993	20334922
Bcam	ENSMUSG00000002980	7	20341480	20356365
Cblc	ENSMUSG00000040525	7	20364230	20382158
Bcl3	ENSMUSG00000053175	7	20393811	20408119
Gm19345	ENSMUSG00000092216	7	20437352	20443696
Ceacam16	ENSMUSG00000014686	7	20437446	20446648
Ceacam19	ENSMUSG00000049848	7	20461091	20473314
Pvr	ENSMUSG00000040511	7	20488927	20506509
2210010C17Rik	ENSMUSG00000040498	7	20522654	20536092
Rpl7a-ps8	ENSMUSG00000070778	7	20539120	20539932
Ceacam20	ENSMUSG00000070777	7	20550761	20576462
Nlrp9b	ENSMUSG00000060508	7	20593372	20658655
Zfp296	ENSMUSG00000011267	7	20162636	20166005
Clasrp	ENSMUSG00000061028	7	20166393	20189817
Relb	ENSMUSG00000002983	7	20191566	20214787
Clptm1	ENSMUSG00000002981	7	20216930	20250379
Apoc2	ENSMUSG00000002992	7	20256928	20266772
Apoc4	ENSMUSG00000074336	7	20263443	20266765
Apoc1	ENSMUSG00000040564	7	20274833	20278007
Apoe	ENSMUSG00000002985	7	20281458	20284515
U1	ENSMUSG00000064580	7	19827479	19827638
U1	ENSMUSG00000065388	7	20046146	20046284
n-R5s152	ENSMUSG00000070150	7	20595433	20595551
Mir330	ENSMUSG00000065543	7	19766814	19766911
U6	ENSMUSG00000065368	7	19330452	19330558
Mir343	ENSMUSG00000076315	7	19971992	19972066
Mir3100	ENSMUSG00000092659	7	19672177	19672241
Rgs9bp	ENSMUSG00000056043	7	36364017	36370601
Gm16929	ENSMUSG00000084801	7	36557397	36564187
Gm17327	ENSMUSG00000090311	7	35009774	35015255
Gpi1	ENSMUSG00000036427	7	34987141	35015308
4931406P16Rik	ENSMUSG00000066571	7	35021726	35098570
Gm6096	ENSMUSG00000078380	7	35036057	35036512
Lsm14a	ENSMUSG00000066568	7	35129665	35174559
Kctd15	ENSMUSG00000030499	7	35424033	35440528
Chst8	ENSMUSG00000060402	7	35459487	35597730
Pepd	ENSMUSG00000063931	7	35697398	35829729
Cebpg	ENSMUSG00000056216	7	35831441	35841522
Cebpa	ENSMUSG00000034957	7	35904312	35906945
Slc7a10	ENSMUSG00000030495	7	35971404	35989917
Lrp3	ENSMUSG00000001802	7	35984852	36000389
Gpatch1	ENSMUSG00000063808	7	36061555	36103459
Rhpn2	ENSMUSG00000030494	7	36119194	36177304
C230052I12Rik	ENSMUSG00000030493	7	36177294	36181836
Gm12762	ENSMUSG00000086526	7	35015439	35019094
Gm12758	ENSMUSG00000085105	7	35019396	35025226
Gm12774	ENSMUSG00000082684	7	35168678	35169093
Gm12764	ENSMUSG00000086184	7	35173684	35179798
Gm12766	ENSMUSG00000085124	7	35223156	35305904
Gm12780	ENSMUSG00000081863	7	35280440	35281084
Gm12784	ENSMUSG00000086631	7	35332225	35341223
Gm12781	ENSMUSG00000085923	7	35438203	35445435
Gm12756	ENSMUSG00000087127	7	35450432	35459018
Gm10166	ENSMUSG00000066543	7	36903274	36903877
Ccdc123	ENSMUSG00000023072	7	36182054	36223708
Pdcd5	ENSMUSG00000030417	7	36427001	36432540
Dpy19l3	ENSMUSG00000043671	7	36470184	36539473
Zfp507	ENSMUSG00000044452	7	36557365	36588008
E130304I02Rik	ENSMUSG00000044997	7	36587612	36588046
Ankrd27	ENSMUSG00000034867	7	36371266	36424256
Slc7a9	ENSMUSG00000030492	7	36234056	36251055
Tdrd12	ENSMUSG00000030491	7	36254117	36322764
Nudt19	ENSMUSG00000034875	7	36332204	36341323
SNORA17	ENSMUSG00000077469	7	35728875	35729004
5S_rRNA	ENSMUSG00000088799	7	35886841	35886959
AC150683.1	ENSMUSG00000093715	7	36019779	36019847
AC149058.1	ENSMUSG00000093153	7	35866929	35866998
SNORA17	ENSMUSG00000088307	7	36002254	36002379
Olfr598	ENSMUSG00000073951	7	110477002	110477961
Olfr599	ENSMUSG00000073950	7	110486526	110487575
Olfr600	ENSMUSG00000045540	7	110494496	110495443
Olfr601	ENSMUSG00000061200	7	110506738	110507727
Olfr603	ENSMUSG00000059874	7	110531576	110532514
Usp17l5	ENSMUSG00000058976	7	110563586	110568394
Olfr605	ENSMUSG00000058079	7	110590691	110591635
Olfr606	ENSMUSG00000073949	7	110599853	110600812
Olfr607	ENSMUSG00000042402	7	110608737	110609720
Olfr608	ENSMUSG00000073948	7	110618555	110619505
Olfr609	ENSMUSG00000046396	7	110640429	110641393
Olfr610	ENSMUSG00000045584	7	110654511	110655458
Olfr611	ENSMUSG00000061241	7	110665925	110666896
Olfr612	ENSMUSG00000066264	7	110686775	110687746
Olfr613	ENSMUSG00000078624	7	110698882	110704018
Olfr615	ENSMUSG00000073947	7	110708768	110709934
Olfr616	ENSMUSG00000047544	7	110712838	110713912
Olfr617	ENSMUSG00000073946	7	110732538	110733697
Olfr618	ENSMUSG00000073945	7	110745832	110746788
Olfr619	ENSMUSG00000073944	7	110752103	110753226
Olfr620	ENSMUSG00000045132	7	110759924	110760865
Olfr622	ENSMUSG00000050085	7	110787646	110788750
Olfr623	ENSMUSG00000055124	7	110808758	110809832
Olfr624	ENSMUSG00000045780	7	110818617	110819543
Olfr625-ps1	ENSMUSG00000073943	7	110831234	110832199
Olfr243	ENSMUSG00000073942	7	110865110	110866060
Olfr628	ENSMUSG00000073941	7	110880357	110881838
Olfr629	ENSMUSG00000047545	7	110888715	110889836
Olfr630	ENSMUSG00000050281	7	110902664	110905864
Olfr69	ENSMUSG00000058662	7	110915791	110920108
Olfr68	ENSMUSG00000061626	7	110925910	110926857
Olfr67	ENSMUSG00000047535	7	110935726	110940344
Hbb-b2	ENSMUSG00000073940	7	110961038	110962510
Hbb-b1	ENSMUSG00000052305	7	110975048	110976610
Hbb-bh2	ENSMUSG00000078621	7	110987659	110988941
Hbb-bh1	ENSMUSG00000052217	7	110990150	110991678
Hbb-y	ENSMUSG00000052187	7	111000259	111001754
Olfr66	ENSMUSG00000058200	7	111029820	111030755
Olfr64	ENSMUSG00000063615	7	111041324	111042985
Olfr65	ENSMUSG00000047163	7	111054856	111055961
Olfr631	ENSMUSG00000042219	7	111063576	111078425
Olfr632	ENSMUSG00000073938	7	111085896	111086849
Olfr633	ENSMUSG00000073937	7	111095082	111096020
Olfr635	ENSMUSG00000073934	7	111127690	111128655
Olfr638	ENSMUSG00000073933	7	111151773	111152738
Olfr639	ENSMUSG00000066263	7	111160159	111161214
Olfr640	ENSMUSG00000066262	7	111169886	111170830
Olfr641	ENSMUSG00000073932	7	111188312	111189250
Olfr642	ENSMUSG00000049797	7	111197922	111198866
Olfr643	ENSMUSG00000058621	7	111207170	111208114
Olfr644	ENSMUSG00000062172	7	111216599	111217543
Olfr645	ENSMUSG00000051340	7	111232557	111233689
Olfr646	ENSMUSG00000073931	7	111254795	111255733
4931431F19Rik	ENSMUSG00000055643	7	111276427	111278337
Ubqln3	ENSMUSG00000051618	7	111289137	111291793
Ubqlnl	ENSMUSG00000051437	7	111296773	111299070
E030002O03Rik	ENSMUSG00000044265	7	111301527	111313345
Olfr648	ENSMUSG00000042909	7	111327970	111328920
Olfr649	ENSMUSG00000044899	7	111337780	111344474
Trim6	ENSMUSG00000072244	7	111367307	111383666
Trim34a	ENSMUSG00000056144	7	111392971	111489207
Trim5	ENSMUSG00000060441	7	111411900	111436608
Trim12a	ENSMUSG00000066258	7	111448408	111463980
Trim34b	ENSMUSG00000090215	7	111448744	111485423
Trim12c	ENSMUSG00000057143	7	111487268	111501876
Trim30b	ENSMUSG00000052749	7	111503896	111518398
Trim30b	ENSMUSG00000091576	7	111503912	111507160
Trim30c	ENSMUSG00000078616	7	111530579	111539100
Trim30a	ENSMUSG00000030921	7	111557539	111613707
Trim30d	ENSMUSG00000057596	7	111618528	111656363
Olfr651	ENSMUSG00000073928	7	111701398	111702466
Olfr652	ENSMUSG00000073927	7	111712666	111713726
Olfr653	ENSMUSG00000073926	7	111728138	111729183
Olfr654	ENSMUSG00000073925	7	111736233	111737387
Olfr655	ENSMUSG00000051182	7	111744767	111745693
Olfr656	ENSMUSG00000073924	7	111766171	111767161
Olfr657	ENSMUSG00000073923	7	111784190	111785150
Olfr658	ENSMUSG00000070421	7	111791394	111795819
Olfr659	ENSMUSG00000073922	7	111819218	111820186
Olfr661	ENSMUSG00000073920	7	111836527	111837490
Olfr664	ENSMUSG00000051885	7	111881956	111882876
Dub3	ENSMUSG00000043073	7	111916825	111921391
Dub1a	ENSMUSG00000062369	7	111988771	111991117
Dub1	ENSMUSG00000054568	7	112005523	112011181
Olfr665	ENSMUSG00000073917	7	112029223	112030173
Olfr666	ENSMUSG00000063582	7	112041184	112042140
Olfr667	ENSMUSG00000056782	7	112064828	112065808
Olfr669	ENSMUSG00000073916	7	112087042	112087995
Gm5900	ENSMUSG00000059039	7	112098429	112098803
Olfr670	ENSMUSG00000044705	7	112108306	112109244
Olfr671	ENSMUSG00000060856	7	112123556	112124497
Olfr672	ENSMUSG00000051172	7	112144478	112145416
Olfr675	ENSMUSG00000063117	7	112172539	112173480
Olfr676	ENSMUSG00000073915	7	112183714	112184667
Olfr677	ENSMUSG00000073914	7	112204762	112205700
Olfr678	ENSMUSG00000073913	7	112217983	112218924
Olfr679	ENSMUSG00000073912	7	112234228	112235179
Olfr680-ps1	ENSMUSG00000041885	7	112239222	112241301
Olfr681	ENSMUSG00000073911	7	112269969	112270920
Olfr682-ps1	ENSMUSG00000059768	7	112274886	112276919
Olfr683	ENSMUSG00000044120	7	112291864	112292823
Olfr684	ENSMUSG00000047225	7	112305081	112306194
Olfr685	ENSMUSG00000047794	7	112328827	112329914
Olfr686	ENSMUSG00000048425	7	112351873	112352890
Olfr687	ENSMUSG00000073908	7	112424031	112424945
Olfr688	ENSMUSG00000073909	7	112436609	112437574
Olfr689	ENSMUSG00000073907	7	112462496	112463571
Olfr602-ps1	ENSMUSG00000082739	7	110516034	110516993
Gm15121	ENSMUSG00000081945	7	110608737	110609703
Olfr621-ps1	ENSMUSG00000081315	7	110777538	110778472
Olfr626-ps1	ENSMUSG00000081038	7	110840332	110840616
Olfr260-ps1	ENSMUSG00000082077	7	110848090	110849268
Gm15115	ENSMUSG00000083967	7	110978150	110978413
Hbb-bh3	ENSMUSG00000083216	7	110981145	110982237
Hbb-bh0	ENSMUSG00000085700	7	110998534	110998662
Gm15118	ENSMUSG00000083854	7	111031168	111031518
Olfr634-ps1	ENSMUSG00000080751	7	111104926	111105880
Gm4886	ENSMUSG00000082281	7	111122073	111125621
Olfr636-ps1	ENSMUSG00000055621	7	111137505	111138521
Olfr637-ps1	ENSMUSG00000084236	7	111144514	111144975
4930516K23Rik	ENSMUSG00000090219	7	111147314	111285919
Olfr647-ps1	ENSMUSG00000083513	7	111315923	111316799
Olfr650-ps1	ENSMUSG00000081859	7	111354528	111355523
Gm15135	ENSMUSG00000086886	7	111409979	111410688
Gm15133	ENSMUSG00000087175	7	111463533	111473352
Gm16464	ENSMUSG00000082154	7	111649569	111650663
Gm6574	ENSMUSG00000083248	7	111677248	111677609
Trim30e-ps1	ENSMUSG00000073929	7	111681473	111683875
Usp-ps	ENSMUSG00000082084	7	111800766	111801722
Olfr660-ps1	ENSMUSG00000081694	7	111827232	111827606
Olfr663	ENSMUSG00000073919	7	111852083	111853041
Gm4887	ENSMUSG00000086229	7	111969718	111970770
Olfr668	ENSMUSG00000057770	7	112073348	112074276
AC143329.1	ENSMUSG00000077063	7	110729781	110729890
AC162877.1	ENSMUSG00000080367	7	110564320	110564440
U6	ENSMUSG00000064907	7	111571788	111571894
AC123830.1	ENSMUSG00000093324	7	111337262	111337343
U6	ENSMUSG00000088658	7	111413197	111413304
Gm16568	ENSMUSG00000089702	9	15135017	15139789
2200002K05Rik	ENSMUSG00000031937	9	15043489	15063837
Med17	ENSMUSG00000031935	9	15064796	15084311
4931406C07Rik	ENSMUSG00000031938	9	15087783	15106000
Taf1d	ENSMUSG00000031939	9	15110658	15121441
5830418K08Rik	ENSMUSG00000046111	9	15121359	15162232
BC017612	ENSMUSG00000058173	9	15309931	15349704
Ccdc67	ENSMUSG00000039977	9	15364308	15432377
Slc36a4	ENSMUSG00000043885	9	15514182	15546828
Mtnr1b	ENSMUSG00000050901	9	15667058	15679000
Fat3	ENSMUSG00000074505	9	15714649	16182681
Gm5611	ENSMUSG00000090602	9	16834489	16835343
SNORA40	ENSMUSG00000077614	9	15116996	15117118
SNORA25	ENSMUSG00000065663	9	15121120	15121252
snoU2_19	ENSMUSG00000077394	9	15130908	15130983
snoZ40	ENSMUSG00000064797	9	15119966	15120039
Scarna9	ENSMUSG00000077506	9	15130708	15130777
SNORA18	ENSMUSG00000065282	9	15118246	15118376
SNORA32	ENSMUSG00000065265	9	15120933	15121032
SNORA1	ENSMUSG00000064634	9	15119633	15119765
SNORA8	ENSMUSG00000065226	9	15119289	15119425
SNORD5	ENSMUSG00000088929	9	15118518	15118588
U7	ENSMUSG00000089360	9	17044105	17044170
Gm10698	ENSMUSG00000079884	9	33535831	33536436
A130066N16Rik	ENSMUSG00000053889	9	34725818	34737094
4930581F22Rik	ENSMUSG00000070315	9	34924313	34938507
Gm6762	ENSMUSG00000086984	9	35381221	35382248
Gm10105	ENSMUSG00000061932	9	35396663	35396935
Kirrel3	ENSMUSG00000032036	9	34293711	34844301
St3gal4	ENSMUSG00000032038	9	34854164	34924395
Dcps	ENSMUSG00000032040	9	34931993	34983646
Tirap	ENSMUSG00000032041	9	34992136	35007876
Srpr	ENSMUSG00000032042	9	35007760	35055558
Foxred1	ENSMUSG00000039048	9	35011791	35018640
Fam118b	ENSMUSG00000050471	9	35024550	35075390
Rpusd4	ENSMUSG00000032044	9	35075450	35085316
Gm5614	ENSMUSG00000066771	9	35089103	35089420
Cdon	ENSMUSG00000038119	9	35228713	35315236
Ddx25	ENSMUSG00000032101	9	35349433	35366055
Pus3	ENSMUSG00000032103	9	35366180	35374768
Hyls1	ENSMUSG00000050555	9	35368405	35377688
Pate2	ENSMUSG00000074452	9	35377869	35497903
Pate4	ENSMUSG00000032099	9	35414678	35419520
Gm17365	ENSMUSG00000090858	9	35453647	35455704
Gm17252	ENSMUSG00000091215	9	35492664	35494956
Gm17346	ENSMUSG00000091603	9	34396111	34396889
U1	ENSMUSG00000065934	9	35282470	35282631
5S_rRNA	ENSMUSG00000088605	9	35311173	35311280
5S_rRNA	ENSMUSG00000089465	9	34767604	34767733
SNORA48	ENSMUSG00000088056	9	34952221	34952364
SNORA17	ENSMUSG00000088905	9	33725077	33725207
Gm17677	ENSMUSG00000091174	9	35548634	35549837
Gm17727	ENSMUSG00000090738	9	35584198	35585470
D730048I06Rik	ENSMUSG00000032108	9	35585618	35597697
9230110F15Rik	ENSMUSG00000047980	9	35645914	35651735
9230113P08Rik	ENSMUSG00000078934	9	35716008	35718381
Gm5916	ENSMUSG00000091411	9	35927519	35936364
Gm3867	ENSMUSG00000066767	9	36064643	36065908
Gm3896	ENSMUSG00000093721	9	36823343	36828256
Gm10177	ENSMUSG00000090136	9	37060507	37060950
Tpt1-ps5	ENSMUSG00000059252	9	37504100	37504618
Olfr892-ps1	ENSMUSG00000058521	9	37997312	37998237
Olfr908	ENSMUSG00000063732	9	38323619	38324550
Pknox2	ENSMUSG00000035934	9	36697550	36954899
Tmem218	ENSMUSG00000032121	9	37015918	37030795
Slc37a2	ENSMUSG00000032122	9	37036734	37063323
Ccdc15	ENSMUSG00000034303	9	37083420	37155977
Hepacam	ENSMUSG00000046240	9	37174953	37194157
Robo4	ENSMUSG00000032125	9	37209482	37221608
Robo3	ENSMUSG00000032128	9	37223254	37240760
BC024479	ENSMUSG00000042138	9	37296906	37331733
Esam	ENSMUSG00000001946	9	37335663	37345904
Vsig2	ENSMUSG00000001943	9	37346840	37351790
Nrgn	ENSMUSG00000053310	9	37352078	37360330
Spa17	ENSMUSG00000001948	9	37410886	37421199
Siae	ENSMUSG00000001942	9	37421432	37455903
Tbrg1	ENSMUSG00000011114	9	37456767	37464897
Panx3	ENSMUSG00000011118	9	37467487	37476807
Olfr151	ENSMUSG00000061165	9	37518857	37538646
Olfr874	ENSMUSG00000063350	9	37553721	37554727
Olfr875	ENSMUSG00000058628	9	37580222	37581225
Olfr876	ENSMUSG00000066750	9	37611474	37612521
Olfr877	ENSMUSG00000066749	9	37662405	37663340
Olfr145	ENSMUSG00000066748	9	37704910	37705960
Olfr878	ENSMUSG00000066747	9	37726133	37727197
Olfr881	ENSMUSG00000060583	9	37800077	37801024
Olfr883	ENSMUSG00000062841	9	37833393	37834322
Olfr884	ENSMUSG00000058130	9	37854809	37855895
Olfr885	ENSMUSG00000057029	9	37868907	37869836
Olfr887	ENSMUSG00000059942	9	37892423	37893352
Olfr888	ENSMUSG00000059275	9	37916273	37917217
Olfr889	ENSMUSG00000062211	9	37923277	37924312
Olfr890	ENSMUSG00000061096	9	37950722	37951666
Olfr891	ENSMUSG00000045528	9	37987456	37988406
Olfr893	ENSMUSG00000070312	9	38016637	38017578
Olfr894	ENSMUSG00000070311	9	38026403	38027351
Olfr143	ENSMUSG00000070310	9	38061004	38061945
Olfr895	ENSMUSG00000070309	9	38076100	38077050
Olfr25	ENSMUSG00000058270	9	38137077	38138144
Olfr898	ENSMUSG00000060101	9	38156670	38157620
Olfr250	ENSMUSG00000049864	9	38175133	38176128
Olfr251	ENSMUSG00000062388	9	38185468	38186418
Olfr147	ENSMUSG00000049098	9	38209305	38211414
Olfr901	ENSMUSG00000052058	9	38237869	38238804
Olfr902	ENSMUSG00000049334	9	38256377	38257432
Olfr904	ENSMUSG00000051620	9	38271628	38272560
Olfr905	ENSMUSG00000046455	9	38280334	38281266
Olfr906	ENSMUSG00000039962	9	38295616	38296551
Olfr907	ENSMUSG00000045066	9	38306256	38307188
Olfr911-ps1	ENSMUSG00000062621	9	38331315	38332254
Olfr910	ENSMUSG00000057444	9	38345467	38347414
Olfr912	ENSMUSG00000060114	9	38387829	38389796
Olfr913	ENSMUSG00000059189	9	38400388	38402746
Olfr914	ENSMUSG00000047050	9	38414052	38415002
Olfr916	ENSMUSG00000064113	9	38465043	38465975
Olfr917	ENSMUSG00000063225	9	38472498	38473427
Olfr918	ENSMUSG00000046150	9	38480089	38481066
Olfr919	ENSMUSG00000056961	9	38505014	38505961
Vwa5a	ENSMUSG00000023186	9	38525853	38550922
Olfr920	ENSMUSG00000061039	9	38560381	38564448
Olfr921	ENSMUSG00000049926	9	38580673	38583939
Olfr922	ENSMUSG00000043911	9	38622993	38624124
Olfr923	ENSMUSG00000044798	9	38635200	38636267
Olfr924	ENSMUSG00000062103	9	38655701	38656627
Olfr26	ENSMUSG00000047667	9	38662645	38663575
Olfr926	ENSMUSG00000064333	9	38684711	38685761
Olfr930	ENSMUSG00000063221	9	38737676	38738774
SNORA17	ENSMUSG00000077240	9	38318758	38318881
U2	ENSMUSG00000065620	9	37630171	37630369
n-R5s82	ENSMUSG00000077401	9	36833984	36834092
SNORA42	ENSMUSG00000077483	9	36980465	36980579
Olfr933	ENSMUSG00000058515	9	38783236	38784238
Olfr934	ENSMUSG00000057424	9	38789695	38790627
Olfr935	ENSMUSG00000059595	9	38802092	38803018
Olfr146	ENSMUSG00000058820	9	38826144	38827204
Olfr937	ENSMUSG00000047724	9	38867314	38868249
Olfr938	ENSMUSG00000048501	9	38885283	38886401
Olfr27	ENSMUSG00000049708	9	38935752	38952657
Olfr943	ENSMUSG00000062149	9	38991765	38992709
CT025680.1	ENSMUSG00000078003	9	38856143	38856234
AC073947.1	ENSMUSG00000093152	9	38882996	38883079
Olfr944	ENSMUSG00000060905	9	39024944	39025879
Olfr1537-ps1	ENSMUSG00000063670	9	39045072	39046016
Olfr945	ENSMUSG00000063380	9	39065305	39066267
Olfr948	ENSMUSG00000057349	9	39126232	39127197
Olfr951	ENSMUSG00000060129	9	39201378	39202322
Olfr952	ENSMUSG00000058856	9	39233678	39234733
Olfr954	ENSMUSG00000064173	9	39269018	39269962
Olfr955	ENSMUSG00000063176	9	39277365	39278309
Olfr44	ENSMUSG00000062649	9	39291789	39301573
Olfr957	ENSMUSG00000042949	9	39318368	39319303
SNORA17	ENSMUSG00000077427	9	39345411	39345537
Olfr958	ENSMUSG00000050853	9	39357513	39358454
Olfr959	ENSMUSG00000059366	9	39379845	39380899
Irak1bp1	ENSMUSG00000032251	9	82723413	82741295
Phip	ENSMUSG00000032253	9	82759766	82869096
Hmgn3	ENSMUSG00000066456	9	83003555	83040292
Lca5	ENSMUSG00000032258	9	83283900	83334734
Lca5	ENSMUSG00000090403	9	83284216	83286185
Gm17498	ENSMUSG00000092026	9	83303183	83303530
Rps27a-ps2	ENSMUSG00000058838	9	83303245	83303770
Sh3bgrl2	ENSMUSG00000032261	9	83441934	83532408
Elovl4	ENSMUSG00000032262	9	83672300	83699912
Ttk	ENSMUSG00000038379	9	83728296	83765997
Gm5919	ENSMUSG00000090522	9	83775821	83779657
Bckdhb	ENSMUSG00000032263	9	83818757	84017846
U6	ENSMUSG00000088760	9	82356963	82357059
U6	ENSMUSG00000064469	9	83831976	83832082
SNORA17	ENSMUSG00000077415	9	82141455	82141585
U1	ENSMUSG00000077666	9	84081962	84082146
U7	ENSMUSG00000089066	9	82333021	82333081
Gm18489	ENSMUSG00000092184	9	116968276	116968826
Gm20397	ENSMUSG00000092516	9	116974645	116975006
Gm17396	ENSMUSG00000079669	9	117161654	117163814
Gm20396	ENSMUSG00000092504	9	117312097	117313460
Rbms3	ENSMUSG00000039607	9	116481864	117539031
Gm16977	ENSMUSG00000085506	9	117782262	117790320
Gm17399	ENSMUSG00000092135	9	118059349	118079494
Golga4	ENSMUSG00000038708	9	118415393	118491640
Zcwpw2	ENSMUSG00000032443	9	117856918	117923278
Azi2	ENSMUSG00000039285	9	117949617	117978912
Cmc1	ENSMUSG00000039163	9	117974213	118059198
Eomes	ENSMUSG00000032446	9	118387330	118395250
Itga9	ENSMUSG00000039115	9	118515808	118810121
U4	ENSMUSG00000084515	9	118376102	118376182
7SK	ENSMUSG00000084608	9	118196904	118197210
AC157475.1	ENSMUSG00000078044	9	117908454	117908548
Gm10157	ENSMUSG00000066270	9	118746731	118747073
Gm2415	ENSMUSG00000086119	9	118799193	118835387
Gm16295	ENSMUSG00000087041	9	118833991	118834895
Ctdspl	ENSMUSG00000047409	9	118835571	118953116
Cnksr3	ENSMUSG00000015202	10	3134304	3227478
Ipcef1	ENSMUSG00000064065	10	3294063	3460745
Oprm1	ENSMUSG00000000766	10	3308332	3588035
Gm10945	ENSMUSG00000078488	10	3584780	3605912
Gm15536	ENSMUSG00000081926	10	3307767	3307880
Rgs17	ENSMUSG00000019775	10	4424141	4520878
Mtrf1l	ENSMUSG00000019774	10	4522631	4534654
Fbxo5	ENSMUSG00000019773	10	4540941	4547381
Vip	ENSMUSG00000019772	10	4698927	4707323
Myct1	ENSMUSG00000046916	10	4739754	4752813
Syne1	ENSMUSG00000019769	10	4795849	5326338
Gm16153	ENSMUSG00000085687	10	5923172	5937508
Gm16074	ENSMUSG00000082247	10	6353727	6354170
Gm10097	ENSMUSG00000061261	10	5277031	5277348
Esr1	ENSMUSG00000019768	10	5340927	5734948
Gm221	ENSMUSG00000019767	10	5784310	5864039
1700052N19Rik	ENSMUSG00000061759	10	5891400	5914074
Rmnd1	ENSMUSG00000019763	10	5914153	5944626
Zbtb2	ENSMUSG00000075327	10	5958433	5979467
Akap12	ENSMUSG00000038587	10	5987073	6080212
Mthfd1l	ENSMUSG00000040675	10	6179460	6373423
SNORD88	ENSMUSG00000084430	10	5570951	5571041
AC161829.1	ENSMUSG00000093189	10	5310085	5310366
U1	ENSMUSG00000065371	10	5862148	5862307
U8	ENSMUSG00000089473	10	6176523	6176654
U1	ENSMUSG00000065792	10	6242072	6242228
RNase_MRP	ENSMUSG00000088375	10	5778328	5778567
U6	ENSMUSG00000077596	10	4989262	4989368
AC162387.1	ENSMUSG00000092769	10	4659162	4659257
Plekhg1	ENSMUSG00000040624	10	6379238	6606177
Gm16148	ENSMUSG00000082605	10	6399450	6400342
Gm16149	ENSMUSG00000082123	10	6476934	6477242
Gm16254	ENSMUSG00000087350	10	7325882	7326611
Iyd	ENSMUSG00000019762	10	6791664	6806301
Ppp1r14c	ENSMUSG00000040653	10	6881566	6980391
H60c	ENSMUSG00000091618	10	7078791	7088611
9230019H11Rik	ENSMUSG00000071434	10	7216995	7226702
Lrp11	ENSMUSG00000019796	10	7309598	7345281
Pcmt1	ENSMUSG00000019795	10	7349171	7400934
Nup43	ENSMUSG00000040034	10	7387301	7398679
Lats1	ENSMUSG00000040021	10	7401007	7436256
Katna1	ENSMUSG00000019794	10	7445798	7482948
Gm16760	ENSMUSG00000086086	10	6979406	6982468
5S_rRNA	ENSMUSG00000089392	10	6411664	6411772
AC155833.1	ENSMUSG00000080655	10	6921426	6921518
Gm20470	ENSMUSG00000092190	10	7463318	7480897
Utrn	ENSMUSG00000019820	10	12101986	12589163
Stx11	ENSMUSG00000039232	10	12659787	12684065
Sf3b5	ENSMUSG00000078348	10	12728256	12728988
Plagl1	ENSMUSG00000019817	10	12810497	12851500
Fam164b	ENSMUSG00000019815	10	12869346	12897829
Ltv1	ENSMUSG00000019814	10	12898446	12912943
Phactr2	ENSMUSG00000062866	10	12933201	13194202
Fuca2	ENSMUSG00000019810	10	13219346	13238841
Pex3	ENSMUSG00000019809	10	13243648	13272948
Adat2	ENSMUSG00000019808	10	13272700	13283182
Aig1	ENSMUSG00000019806	10	13366860	13588786
Hivep2	ENSMUSG00000015501	10	13686185	13871182
Gm8330	ENSMUSG00000091527	10	13686830	13727211
B230208H11Rik	ENSMUSG00000085233	10	12636446	12642898
U6	ENSMUSG00000064531	10	13608343	13608449
U1	ENSMUSG00000065096	10	12083208	12083371
U6	ENSMUSG00000088516	10	12513673	12513772
SNORA73	ENSMUSG00000065181	10	12088421	12088630
Gm16234	ENSMUSG00000085572	10	14384026	14388124
Gm8355	ENSMUSG00000059814	10	14465084	14467190
Gpr126	ENSMUSG00000039116	10	14122391	14264842
Gm10335	ENSMUSG00000071532	10	14242884	14243354
Vta1	ENSMUSG00000019868	10	14374561	14425366
Gje1	ENSMUSG00000019867	10	14435429	14438020
Nmbr	ENSMUSG00000019865	10	14480027	14490389
B230364G03Rik	ENSMUSG00000090645	10	14478441	14480526
SNORA17	ENSMUSG00000088730	10	14704476	14704605
SNORA17	ENSMUSG00000089333	10	13953319	13953429
Zwint	ENSMUSG00000019923	10	72117593	72137712
Pcdh15	ENSMUSG00000052613	10	72562090	74112475
Gm9923	ENSMUSG00000053830	10	71772069	71773907
Pcdh15	ENSMUSG00000046980	10	72562202	72562673
Gm15398	ENSMUSG00000085456	10	72664147	72789775
Gm5778	ENSMUSG00000091825	10	72664443	72665514
Gm15397	ENSMUSG00000085176	10	72952722	72981138
Gm6407	ENSMUSG00000093548	10	73153005	73153553
SNORA17	ENSMUSG00000077642	10	71990298	71990430
Bpifc	ENSMUSG00000050108	10	85422085	85474640
Fbxo7	ENSMUSG00000001786	10	85484717	85514618
Syn3	ENSMUSG00000059602	10	85517870	85961641
Timp3	ENSMUSG00000020044	10	85763117	85812251
Gm6729	ENSMUSG00000090816	10	86002628	86004079
Gm5174	ENSMUSG00000090308	10	86118684	86120126
Hsp90b1	ENSMUSG00000020048	10	86152954	86168254
BC030307	ENSMUSG00000044937	10	86168556	86239588
Nt5dc3	ENSMUSG00000054027	10	86241750	86301134
Stab2	ENSMUSG00000035459	10	86303943	86470770
1700113H08Rik	ENSMUSG00000047129	10	86520791	86693344
Gm10764	ENSMUSG00000074810	10	86752238	86754572
Ascl1	ENSMUSG00000020052	10	86953564	86956405
Pah	ENSMUSG00000020051	10	86984540	87046881
Ascl4	ENSMUSG00000085111	10	85391236	85408951
4930486F22Rik	ENSMUSG00000085435	10	85558630	85576325
Gm15990	ENSMUSG00000087256	10	85588572	85592599
Gm15344	ENSMUSG00000084899	10	86154864	86155840
Fabp3-ps1	ENSMUSG00000056366	10	86194732	86195133
Gm16268	ENSMUSG00000089959	10	86301839	86337699
Gm16280	ENSMUSG00000089881	10	86371506	86372758
Gm16270	ENSMUSG00000089775	10	86372224	86375461
Gm16271	ENSMUSG00000089656	10	86434961	86490760
Gm16269	ENSMUSG00000089666	10	86463042	86463450
Gm6713	ENSMUSG00000090414	10	85172072	85173517
Gm6721	ENSMUSG00000090676	10	85270560	85271990
Pwp1	ENSMUSG00000001785	10	85334576	85351841
Prdm4	ENSMUSG00000035529	10	85354715	85379887
Btbd11	ENSMUSG00000020042	10	84849559	85123037
1810014B01Rik	ENSMUSG00000085814	10	86148346	86157551
D10Wsu52e	ENSMUSG00000001783	10	85401382	85420568
SNORA73	ENSMUSG00000087811	10	85560717	85560903
U6	ENSMUSG00000070256	10	86826785	86826891
AC112790.1	ENSMUSG00000080679	10	86308556	86308653
AC152453.1	ENSMUSG00000092686	10	86168061	86168193
U6	ENSMUSG00000077265	10	85501430	85501533
Gm15662	ENSMUSG00000089855	10	104675190	104675348
Gm15666	ENSMUSG00000084399	10	104943272	104944195
Gm15664	ENSMUSG00000089904	10	104957516	104957699
Gm15663	ENSMUSG00000085282	10	105011009	105020930
Tmtc2	ENSMUSG00000036019	10	104624719	105011507
BC067068	ENSMUSG00000036009	10	105200241	105278436
Ccdc59	ENSMUSG00000019897	10	105278123	105284889
Rps15a-ps1	ENSMUSG00000056877	10	105629434	105629826
Ppfia2	ENSMUSG00000053825	10	105902321	106370502
Acss3	ENSMUSG00000035948	10	106373220	106560724
C230021G24Rik	ENSMUSG00000079044	10	105903995	105907824
AC132471.1	ENSMUSG00000080525	10	105287151	105287228
SNORA17	ENSMUSG00000088465	10	106574030	106574114
SNORA61	ENSMUSG00000088415	10	105366668	105366799
n-R5s80	ENSMUSG00000084545	10	105241143	105241253
SNORA17	ENSMUSG00000088084	10	105493014	105493135
Lin7a	ENSMUSG00000019906	10	106708899	106862199
Myf5	ENSMUSG00000000435	10	106919964	106923190
Myf6	ENSMUSG00000035923	10	106929916	106931785
Ptprq	ENSMUSG00000035916	10	106954416	107157083
Otogl	ENSMUSG00000091455	10	107199369	107349190
Ppp1r12a	ENSMUSG00000019907	10	107599249	107714631
Pawr	ENSMUSG00000035873	10	107769245	107851447
AC147634.1	ENSMUSG00000093762	10	107865123	107865216
SNORA38	ENSMUSG00000065653	10	107800721	107800854
Syt1	ENSMUSG00000035864	10	107934706	108448038
7SK	ENSMUSG00000088554	10	108527054	108527331
U6	ENSMUSG00000065802	10	108805144	108805249
Nav3	ENSMUSG00000020181	10	109119716	109437275
4930473D10Rik	ENSMUSG00000089934	10	114194803	114222160
[truncated: 1,391 more rows]

## Sheet: wk14IgG3-PT
Gene Name	Ensembl Gene ID	Chromosome	Start	End
Khdrbs2	ENSMUSG00000026058	1	32229651	32714583
Gm9839	ENSMUSG00000049830	1	32576408	32577844
Gm5415	ENSMUSG00000091318	1	32600391	32604138
Gm10307	ENSMUSG00000070960	1	31672836	31673507
Gm7910	ENSMUSG00000082159	1	31792901	31793737
U6	ENSMUSG00000065223	1	33350521	33350620
U7	ENSMUSG00000089489	1	32625204	32625266
U6	ENSMUSG00000064688	1	32269978	32270084
7SK	ENSMUSG00000089395	1	32783484	32783775
U6	ENSMUSG00000088620	1	31713477	31713583
U6	ENSMUSG00000088750	1	33248838	33248947
U6	ENSMUSG00000065260	1	33479578	33479683
Prim2	ENSMUSG00000026134	1	33510656	33726631
1700001G17Rik	ENSMUSG00000044744	1	33726688	33727557
Rab23	ENSMUSG00000004768	1	33776727	33799409
Bag2	ENSMUSG00000042215	1	33802329	33814639
Zfp451	ENSMUSG00000042197	1	33817317	33871440
Gm15455	ENSMUSG00000081402	1	33892744	33895759
Bend6	ENSMUSG00000042182	1	33908897	33964661
Dst	ENSMUSG00000026131	1	33965125	34365495
Gm11158	ENSMUSG00000079617	1	34428991	34460294
Ccdc115	ENSMUSG00000042111	1	34493516	34496517
Imp4	ENSMUSG00000026127	1	34496696	34502581
Ptpn18	ENSMUSG00000026126	1	34516591	34532499
Prss39	ENSMUSG00000026125	1	34555275	34559907
Cfc1	ENSMUSG00000026124	1	34592493	34601156
Prss40	ENSMUSG00000037529	1	34600820	34617788
1700101I19Rik	ENSMUSG00000045815	1	34636069	34636458
Fam123c	ENSMUSG00000045174	1	34636538	34647783
Arhgef4	ENSMUSG00000037509	1	34778769	34870154
Fam168b	ENSMUSG00000037503	1	34870064	34899910
Plekhb2	ENSMUSG00000026123	1	34906804	34936425
Gm16750	ENSMUSG00000085306	1	34222701	34235118
C230030N03Rik	ENSMUSG00000089955	1	34735033	34781146
C230030N03Rik	ENSMUSG00000046858	1	34779929	34780877
SNORA17	ENSMUSG00000077231	1	35235801	35235929
Mir5103	ENSMUSG00000092852	1	34489966	34490044
U6	ENSMUSG00000084506	1	34038255	34038347
Hs6st1	ENSMUSG00000045216	1	36125245	36163291
Uggt1	ENSMUSG00000037470	1	36198375	36301150
Neurl3	ENSMUSG00000047180	1	36321447	36330270
Arid5a	ENSMUSG00000037447	1	36364578	36380874
4632411B12Rik	ENSMUSG00000010453	1	36392575	36426026
U6	ENSMUSG00000064601	1	35818447	35818551
Fer1l5	ENSMUSG00000037432	1	36473733	36478955
Lman2l	ENSMUSG00000001143	1	36478910	36502116
Cnnm4	ENSMUSG00000037408	1	36528442	36565621
Cnnm3	ENSMUSG00000001138	1	36568712	36585082
Ankrd23	ENSMUSG00000067653	1	36587379	36592584
Ankrd39	ENSMUSG00000079610	1	36595018	36604046
Sema4c	ENSMUSG00000026121	1	36605487	36615194
Fam178b	ENSMUSG00000046337	1	36619539	36740028
D430040D24Rik	ENSMUSG00000087589	1	36615204	36622458
Gm6428	ENSMUSG00000089906	1	36658647	36658991
Cox5b	ENSMUSG00000061518	1	36748332	36750230
Actr1b	ENSMUSG00000037351	1	36756047	36771267
AC084389.1	ENSMUSG00000077939	1	36720810	36720884
Zap70	ENSMUSG00000026117	1	36818695	36839663
Tmem131	ENSMUSG00000026116	1	36849036	36996372
Rpl12-ps1	ENSMUSG00000080054	1	37014738	37015362
Vwa3b	ENSMUSG00000050122	1	37083441	37133841
Vwa3b	ENSMUSG00000026115	1	37210689	37244450
Cnga3	ENSMUSG00000026114	1	37275181	37320229
Inpp4a	ENSMUSG00000026113	1	37356710	37467581
6330578E17Rik	ENSMUSG00000026112	1	37473929	37486948
Unc50	ENSMUSG00000026111	1	37487015	37495969
Mgat4a	ENSMUSG00000026110	1	37496185	37597861
2010300C02Rik	ENSMUSG00000026090	1	37668522	37776930
Tsga10	ENSMUSG00000060771	1	37811417	37922143
Lipt1	ENSMUSG00000037216	1	37928583	37934232
Mitd1	ENSMUSG00000026088	1	37931646	37947256
Mrpl30	ENSMUSG00000026087	1	37947322	37955380
4930439A04Rik	ENSMUSG00000086064	1	37386512	37391017
4930594C11Rik	ENSMUSG00000087233	1	37544038	37545827
4930556I23Rik	ENSMUSG00000089767	1	37671104	37672217
Gm17715	ENSMUSG00000092106	1	37922144	37928233
n-R5s210	ENSMUSG00000070201	1	37062284	37062402
Lyg2	ENSMUSG00000061584	1	37962766	37973338
Gm15457	ENSMUSG00000087374	1	37990441	38010981
Lyg1	ENSMUSG00000026085	1	38003581	38014604
7SK	ENSMUSG00000089141	1	38030812	38031048
Txndc9	ENSMUSG00000058407	1	38040712	38054191
Eif5b	ENSMUSG00000026083	1	38054855	38112424
Rev1	ENSMUSG00000026082	1	38109632	38186507
Aff3	ENSMUSG00000037138	1	38234171	38721800
Lonrf2	ENSMUSG00000048814	1	38850514	38892935
Chst10	ENSMUSG00000026080	1	38920722	38955005
Nms	ENSMUSG00000067604	1	38995994	39007123
Pdcl3	ENSMUSG00000026078	1	39044659	39054081
Gm16150	ENSMUSG00000085391	1	38292265	38303511
Gm16151	ENSMUSG00000085280	1	38364747	38368775
Gm16152	ENSMUSG00000087131	1	38441794	38450819
Epha4	ENSMUSG00000026235	1	77363760	77511663
Pax3	ENSMUSG00000004872	1	78097842	78193709
Sgpp2	ENSMUSG00000032908	1	78306921	78416861
Farsb	ENSMUSG00000026245	1	78414533	78485434
BC035947	ENSMUSG00000090486	1	78494381	78508538
Mogat1	ENSMUSG00000012187	1	78507566	78534748
Acsl3	ENSMUSG00000032883	1	78654400	78703562
Utp14b	ENSMUSG00000079470	1	78654613	78664163
Kcne4	ENSMUSG00000047330	1	78813502	78816599
5S_rRNA	ENSMUSG00000089326	1	77141328	77141421
U1	ENSMUSG00000065215	1	77894858	77895021
Gm5830	ENSMUSG00000072978	1	78964212	78964654
Scg2	ENSMUSG00000050711	1	79431244	79436665
Ap1s3	ENSMUSG00000054702	1	79603451	79668547
SNORA17	ENSMUSG00000077782	1	79510314	79510439
Wdfy1	ENSMUSG00000073643	1	79698837	79772718
Mrpl44	ENSMUSG00000026248	1	79772593	79778020
Serpine2	ENSMUSG00000026249	1	79790772	79855271
D1Ertd622e	ENSMUSG00000044768	1	99540480	99558651
Ppip5k2	ENSMUSG00000040648	1	99602625	99666988
Gin1	ENSMUSG00000026333	1	99666749	99690286
Pam	ENSMUSG00000026335	1	99691691	99992223
Slco6d1	ENSMUSG00000026336	1	100317701	100413565
Gm3531	ENSMUSG00000089782	1	99845478	99845966
B230216N24Rik	ENSMUSG00000089706	1	99927693	99954257
Gm3555	ENSMUSG00000089791	1	100354345	100355739
U6	ENSMUSG00000087804	1	100913941	100914040
7SK	ENSMUSG00000089169	1	99832977	99833288
AC102227.1	ENSMUSG00000077048	1	100446028	100446137
U6	ENSMUSG00000065921	1	99946399	99946505
Cntnap5b	ENSMUSG00000067028	1	101669342	102382519
Gm7110	ENSMUSG00000082431	1	101687006	101687602
SNORA17	ENSMUSG00000087883	1	102149494	102149625
Cdh20	ENSMUSG00000050840	1	106665106	106892058
Rnf152	ENSMUSG00000047496	1	107173494	107253287
Pign	ENSMUSG00000056536	1	107417716	107555585
2310035C23Rik	ENSMUSG00000026319	1	107560438	107651708
Tnfrsf11a	ENSMUSG00000026321	1	107677300	107744558
Gm17634	ENSMUSG00000090759	1	107252584	107258201
Gm3608	ENSMUSG00000067017	1	107352560	107353433
Gm10193	ENSMUSG00000067015	1	107661021	107661251
Gm15699	ENSMUSG00000089866	1	106808008	106808910
U7	ENSMUSG00000089332	1	106793128	106793191
n-R5s216	ENSMUSG00000084704	1	106777501	106777612
AC101970.1	ENSMUSG00000080661	1	106641247	106641336
7SK	ENSMUSG00000088161	1	106382534	106382863
AC132082.1	ENSMUSG00000076999	1	107471264	107471359
U6	ENSMUSG00000089206	1	107842131	107842237
Zcchc2	ENSMUSG00000038866	1	107886983	107930651
Optc	ENSMUSG00000010311	1	135793773	135804576
Prelp	ENSMUSG00000041577	1	135806881	135817991
Fmod	ENSMUSG00000041559	1	135933831	135944854
Btg2	ENSMUSG00000020423	1	135971747	135975697
Gm8618	ENSMUSG00000073559	1	136005915	136006417
Chit1	ENSMUSG00000026450	1	136007819	136048117
Chi3l1	ENSMUSG00000064246	1	136078753	136086758
Mybph	ENSMUSG00000042451	1	136090025	136097808
Adora1	ENSMUSG00000042429	1	136095800	136132008
Myog	ENSMUSG00000026459	1	136186581	136189124
Ppfia4	ENSMUSG00000026458	1	136193360	136229505
Tmem183a	ENSMUSG00000042305	1	136242674	136258576
4933406M09Rik	ENSMUSG00000050526	1	136282517	136287560
Cyb5r1	ENSMUSG00000026456	1	136302358	136308317
Adipor1	ENSMUSG00000026457	1	136311955	136329928
Klhl12	ENSMUSG00000026455	1	136352108	136387595
Gm11092	ENSMUSG00000079319	1	136373211	136373787
Rabif	ENSMUSG00000042229	1	136391225	136406451
4931440L10Rik	ENSMUSG00000046367	1	136437518	136446259
Kdm5b	ENSMUSG00000042207	1	136456748	136529454
Syt2	ENSMUSG00000026452	1	136605877	136649726
Ppp1r12b	ENSMUSG00000073557	1	136651235	136852519
Ube2t	ENSMUSG00000026429	1	136859142	136870739
Lgr6	ENSMUSG00000042793	1	136882925	137001853
Ptprv	ENSMUSG00000066885	1	137007746	137008883
Ptpn7	ENSMUSG00000031506	1	137029302	137041897
Arl8a	ENSMUSG00000026426	1	137043401	137052846
Gpr37l1	ENSMUSG00000026424	1	137056811	137064258
Elf3	ENSMUSG00000003051	1	137150151	137155049
Rnpep	ENSMUSG00000041926	1	137159289	137180661
Timm17a	ENSMUSG00000062580	1	137198109	137210355
Lmod1	ENSMUSG00000048096	1	137221384	137264642
Shisa4	ENSMUSG00000041889	1	137267634	137271814
Ipo9	ENSMUSG00000041879	1	137278889	137327076
Nav1	ENSMUSG00000009418	1	137331157	137481932
Gm4793	ENSMUSG00000054412	1	137481350	137496527
Nav1	ENSMUSG00000090399	1	137503024	137584682
Csrp1	ENSMUSG00000026421	1	137616638	137648809
Phlda3	ENSMUSG00000041801	1	137662696	137665713
Tnni1	ENSMUSG00000026418	1	137679642	137707566
Lad1	ENSMUSG00000041782	1	137715175	137729918
Tnnt2	ENSMUSG00000026414	1	137737452	137748837
Pkp1	ENSMUSG00000026413	1	137767972	137815784
Gm3834	ENSMUSG00000091246	1	136538831	136543097
Gm16606	ENSMUSG00000085392	1	137145138	137163020
Gm15851	ENSMUSG00000090208	1	135803108	135811399
Gm15454	ENSMUSG00000060342	1	136414607	136415258
Gm15445	ENSMUSG00000085311	1	137049540	137050383
Gm4204	ENSMUSG00000079139	1	137129022	137129801
5S_rRNA	ENSMUSG00000087721	1	137047243	137047343
U6	ENSMUSG00000087859	1	137250294	137250399
AC131591.1	ENSMUSG00000077846	1	136705852	136705945
U6	ENSMUSG00000084509	1	136177462	136177568
SNORA61	ENSMUSG00000077202	1	136401915	136402040
AC016814.1	ENSMUSG00000093515	1	137351180	137351260
Igfn1	ENSMUSG00000051985	1	137850155	137902919
Tmem9	ENSMUSG00000026411	1	137904796	137931607
Cacna1s	ENSMUSG00000026407	1	137949327	138016399
Kif21b	ENSMUSG00000041642	1	138027966	138074575
2310006M14Rik	ENSMUSG00000087230	1	138078051	138103674
5730559C18Rik	ENSMUSG00000041605	1	138110108	138130841
Gm15850	ENSMUSG00000086264	1	138022755	138027760
Gpr25	ENSMUSG00000052759	1	138155491	138157450
Camsap2	ENSMUSG00000041570	1	138164700	138242681
Gm17643	ENSMUSG00000091279	1	138112651	138121648
Gm17543	ENSMUSG00000091737	1	138155984	138170983
Ddx59	ENSMUSG00000026404	1	138311848	138336735
Kif14	ENSMUSG00000041498	1	138364535	138428088
Zfp281	ENSMUSG00000041483	1	138521478	138526630
Nr5a2	ENSMUSG00000026398	1	138740161	138857004
A130050O07Rik	ENSMUSG00000051480	1	139824747	139826850
9230116N13Rik	ENSMUSG00000086553	1	138308493	138312096
Gm17718	ENSMUSG00000091667	1	138518675	138521227
Gm16880	ENSMUSG00000085011	1	138592788	138622305
Mir181b-1	ENSMUSG00000065458	1	139863216	139863295
5S_rRNA	ENSMUSG00000088564	1	139884234	139884353
SNORA17	ENSMUSG00000088164	1	139263728	139263824
U7	ENSMUSG00000088970	1	138886788	138886847
U6	ENSMUSG00000077207	1	139112121	139112224
Mir181a-1	ENSMUSG00000065565	1	139863032	139863118
AC125186.2	ENSMUSG00000093144	1	138654087	138654186
AC125186.1	ENSMUSG00000092912	1	138593951	138594048
SNORA17	ENSMUSG00000088715	1	139630895	139631010
Rgs21	ENSMUSG00000091758	1	146366820	146388442
Rgs18	ENSMUSG00000026357	1	146599813	146622565
SNORA17	ENSMUSG00000088579	1	147138484	147138610
U6	ENSMUSG00000065787	1	146807864	146807969
AC102320.1	ENSMUSG00000092688	1	146826614	146826715
U4	ENSMUSG00000088096	1	146456134	146456240
Gm5263	ENSMUSG00000090323	1	148267564	148268004
Fam5c	ENSMUSG00000035131	1	148342759	148749602
Gm15583	ENSMUSG00000080078	1	148572711	148576220
A230059L01Rik	ENSMUSG00000087627	1	148650095	148653152
Gm15584	ENSMUSG00000085822	1	148656961	148688826
BC026585	ENSMUSG00000033488	1	159388711	159419191
Sec16b	ENSMUSG00000026589	1	159436859	159498556
Fam5b	ENSMUSG00000004031	1	160175402	160286391
Astn1	ENSMUSG00000026587	1	160292471	160621917
Pappa2	ENSMUSG00000073530	1	160641862	160887870
1600012P17Rik	ENSMUSG00000047661	1	160888258	160910621
Gm4953	ENSMUSG00000061992	1	161098288	161098773
Rfwd2	ENSMUSG00000040782	1	161162457	161277711
Gm15486	ENSMUSG00000087093	1	159428006	159441852
Mir488	ENSMUSG00000070103	1	160435756	160435864
AC084287.1	ENSMUSG00000080410	1	161261927	161262009
Scarna3a	ENSMUSG00000089536	1	161270414	161270553
Gm10530	ENSMUSG00000073528	1	161544880	161615006
Tnr	ENSMUSG00000015829	1	161667641	161855053
4930523C07Rik	ENSMUSG00000090394	1	161974515	162008559
4930523C07Rik	ENSMUSG00000050883	1	161974715	162001640
4930562F07Rik	ENSMUSG00000026729	1	162004866	162008116
Tnn	ENSMUSG00000026725	1	162015165	162083711
Mrps14	ENSMUSG00000058267	1	162125346	162132301
Cacybp	ENSMUSG00000014226	1	162133056	162142908
Rabgap1l	ENSMUSG00000026721	1	162149305	162723069
Gm10529	ENSMUSG00000073527	1	162005293	162005672
Mir1927	ENSMUSG00000089204	1	162225995	162226103
SNORA17	ENSMUSG00000088145	1	161913627	161913736
SNORA17	ENSMUSG00000077759	1	162575704	162575835
Gm6177	ENSMUSG00000057499	1	162823251	162823715
Rc3h1	ENSMUSG00000040423	1	162836549	162905109
SNORA26	ENSMUSG00000077648	1	162806333	162806453
Pbx1	ENSMUSG00000052534	1	170050130	170362401
Nuf2	ENSMUSG00000026683	1	171428065	171461595
Rgs5	ENSMUSG00000026678	1	171585632	171625944
Rgs4	ENSMUSG00000038530	1	171671608	171677773
1700084C01Rik	ENSMUSG00000070532	1	171858779	171864784
Hsd17b7	ENSMUSG00000026675	1	171879666	171899372
Ddr2	ENSMUSG00000026674	1	171902439	172040632
Uap1	ENSMUSG00000026670	1	172072069	172105088
Uhmk1	ENSMUSG00000026667	1	172123551	172145528
4930500M09Rik	ENSMUSG00000044306	1	172144991	172145687
Sh2d1b2	ENSMUSG00000073494	1	172162880	172183739
Sh2d1b1	ENSMUSG00000026673	1	172207507	172216900
3110045C21Rik	ENSMUSG00000085494	1	171899540	171902526
Gm5265	ENSMUSG00000058622	1	171383659	171384000
Gm15852	ENSMUSG00000089990	1	171862829	171864379
U6	ENSMUSG00000064674	1	171729581	171729687
Mndal	ENSMUSG00000090272	1	175787352	175872622
Ifi203	ENSMUSG00000039997	1	175850538	175872803
Ifi202b	ENSMUSG00000026535	1	175892700	175912975
Ifi205	ENSMUSG00000054203	1	175942129	175961886
Olfr433	ENSMUSG00000045381	1	175972064	175973067
Olfr432	ENSMUSG00000047048	1	175980506	175981444
Olfr430	ENSMUSG00000050134	1	175999431	176000384
Olfr429	ENSMUSG00000049528	1	176019169	176020111
Olfr427	ENSMUSG00000059371	1	176029591	176030538
Olfr231	ENSMUSG00000046486	1	176047222	176048145
Olfr424	ENSMUSG00000051528	1	176066877	176067824
Olfr421	ENSMUSG00000091950	1	176081612	176082661
Olfr420	ENSMUSG00000055033	1	176088853	176089898
Spna1	ENSMUSG00000026532	1	176102907	176178581
Olfr419	ENSMUSG00000050788	1	176180020	176181107
1810030J14Rik	ENSMUSG00000026531	1	176260649	176263004
Olfr417	ENSMUSG00000066672	1	176299050	176299979
Olfr248	ENSMUSG00000059503	1	176321177	176322186
Olfr414	ENSMUSG00000051509	1	176360561	176361515
Olfr220	ENSMUSG00000066671	1	176378756	176379733
Fmn2	ENSMUSG00000028354	1	176431956	176752848
Grem2	ENSMUSG00000050069	1	176763916	176851950
Rgs7	ENSMUSG00000026527	1	176989867	177421261
Fh1	ENSMUSG00000026526	1	177530505	177555766
Kmo	ENSMUSG00000039783	1	177550512	177592247
Opn3	ENSMUSG00000026525	1	177592552	177622907
Chml	ENSMUSG00000078185	1	177616619	177618484
Wdr64	ENSMUSG00000026523	1	177628724	177745865
Exo1	ENSMUSG00000039748	1	177810909	177841527
U6	ENSMUSG00000065666	1	177834676	177834782
U2	ENSMUSG00000077794	1	177730645	177730820
Pld5	ENSMUSG00000055214	1	177892437	178205443
B020018G12Rik	ENSMUSG00000078184	1	177907908	177909245
Cep170	ENSMUSG00000057335	1	178663784	178744198
Sdccag8	ENSMUSG00000026504	1	178744791	178950568
Akt3	ENSMUSG00000019699	1	178950204	179188334
Gm15423	ENSMUSG00000087082	1	178858130	178862842
AC144905.1	ENSMUSG00000093132	1	178809965	178810044
7SK	ENSMUSG00000084749	1	178724087	178724351
Mir350	ENSMUSG00000065573	1	178702456	178702554
U6	ENSMUSG00000087875	1	178630748	178630855
Kif26b	ENSMUSG00000026494	1	180459256	180862986
Smyd3	ENSMUSG00000055067	1	180882091	181448172
Gm5561	ENSMUSG00000075392	1	181450388	181451039
Tfb2m	ENSMUSG00000026492	1	181458186	181476398
Cnst	ENSMUSG00000038949	1	181476501	181557609
Sccpdh	ENSMUSG00000038936	1	181598341	181617320
Gm1305	ENSMUSG00000087236	1	181625428	181675316
Ahctf1	ENSMUSG00000026491	1	181675025	181733811
Gm10518	ENSMUSG00000073486	1	181733507	181734807
Cdc42bpa	ENSMUSG00000026490	1	181890603	182095734
Adck3	ENSMUSG00000026489	1	182095369	182129733
Psen2	ENSMUSG00000010609	1	182157135	182193569
Gm5069	ENSMUSG00000055676	1	182257102	182260681
Itpkb	ENSMUSG00000038855	1	182260607	182354933
6330403A02Rik	ENSMUSG00000053963	1	182362518	182413598
Parp1	ENSMUSG00000026496	1	182499086	182531384
Lin9	ENSMUSG00000058729	1	182571498	182620816
Mixl1	ENSMUSG00000026497	1	182623174	182627165
Acbd3	ENSMUSG00000026499	1	182656174	182684334
H3f3a	ENSMUSG00000060743	1	182730963	182744074
BC031781	ENSMUSG00000038806	1	182781282	182798228
Lefty2	ENSMUSG00000066652	1	182823239	182829234
Pycr2	ENSMUSG00000026520	1	182834405	182838218
Gm17275	ENSMUSG00000090986	1	182732699	182739614
Gm16564	ENSMUSG00000089713	1	180828713	180847745
Gm15480	ENSMUSG00000082395	1	181468548	181469066
Gm16067	ENSMUSG00000073485	1	182743907	182746990
U6	ENSMUSG00000084558	1	182762900	182763007
AC167020.1	ENSMUSG00000092967	1	182663926	182664013
Lefty1	ENSMUSG00000038793	1	182865153	182868531
Tmem63a	ENSMUSG00000026519	1	182872475	182905243
2210411M09Rik	ENSMUSG00000085563	1	182882195	182888280
Ephx1	ENSMUSG00000038776	1	182906286	182951035
9130409I23Rik	ENSMUSG00000038768	1	182981368	182990798
Nvl	ENSMUSG00000026516	1	183023554	183074288
Cnih4	ENSMUSG00000062169	1	183081062	183099125
Wdr26	ENSMUSG00000038733	1	183103359	183142109
Lbr	ENSMUSG00000004880	1	183745447	183772532
Gm5533	ENSMUSG00000056699	1	183781739	183783320
Enah	ENSMUSG00000022995	1	183834576	183950111
Srp9	ENSMUSG00000026511	1	184054868	184062538
Vmn1r1	ENSMUSG00000091013	1	184087275	184088450
Degs1	ENSMUSG00000038633	1	184205903	184212935
Fbxo28	ENSMUSG00000047539	1	184243233	184271737
Gm10517	ENSMUSG00000073482	1	184338750	184339151
Trp53bp2	ENSMUSG00000026510	1	184339303	184392563
Capn2	ENSMUSG00000026509	1	184397391	184447655
Gm16721	ENSMUSG00000087419	1	184414398	184414958
Capn8	ENSMUSG00000038599	1	184495138	184562483
4922505E12Rik	ENSMUSG00000043429	1	184677388	184679253
Susd4	ENSMUSG00000038576	1	184693991	184826729
Tlr5	ENSMUSG00000079164	1	184884919	184906175
Gm8214	ENSMUSG00000090533	1	185505657	185506073
5S_rRNA	ENSMUSG00000089429	1	183770584	183770699
Ush2a	ENSMUSG00000026609	1	190085902	190788920
Kctd3	ENSMUSG00000026608	1	190794977	190831719
Kcnk2	ENSMUSG00000037624	1	191031816	191167711
Cenpf	ENSMUSG00000026605	1	191464478	191511965
Ptpn14	ENSMUSG00000026604	1	191552147	191700574
Smyd2	ENSMUSG00000026603	1	191704371	191746242
Prox1	ENSMUSG00000010175	1	191941917	191994559
Rps6kc1	ENSMUSG00000089872	1	192524081	192735649
Gm17653	ENSMUSG00000090445	1	191657020	191660499
Gm17566	ENSMUSG00000079045	1	191994175	192041155
mmu-mir-1194	ENSMUSG00000080505	1	191217229	191217349
AC124613.1	ENSMUSG00000093064	1	192306751	192307036
Angel2	ENSMUSG00000026634	1	192748991	192770841
Vash2	ENSMUSG00000037568	1	192771527	192803175
Mfsd7b	ENSMUSG00000066595	1	192829711	192850069
1700022P22Rik	ENSMUSG00000057072	1	192860701	192866821
Tatdn3	ENSMUSG00000026632	1	192869705	192886811
Nsl1	ENSMUSG00000062510	1	192886891	192908437
Batf3	ENSMUSG00000026630	1	192922293	192932822
Fam71a	ENSMUSG00000091017	1	192986463	192988696
Atf3	ENSMUSG00000026628	1	192994175	193007219
7SK	ENSMUSG00000088461	1	193020785	193020892
Nenf	ENSMUSG00000037499	1	193130668	193142073
Tmem206	ENSMUSG00000026627	1	193149791	193174793
Ppp2r5a	ENSMUSG00000026626	1	193175860	193220920
Dtl	ENSMUSG00000037474	1	193361244	193399413
Ints7	ENSMUSG00000037461	1	193399642	193446551
Lpgat1	ENSMUSG00000026623	1	193541713	193608134
Nek2	ENSMUSG00000026622	1	193645323	193656929
D730003I15Rik	ENSMUSG00000073478	1	193048353	193049565
U6	ENSMUSG00000064845	1	193596600	193596713
U6	ENSMUSG00000065821	1	193586079	193586182
1700034H15Rik	ENSMUSG00000055833	1	193714112	193731406
Slc30a1	ENSMUSG00000037434	1	193730646	193737126
Rd3	ENSMUSG00000049353	1	193801270	193810273
Traf5	ENSMUSG00000026637	1	193821311	193916440
Mir3473c	ENSMUSG00000093003	1	193822435	193822515
Rcor3	ENSMUSG00000037395	1	193922652	193961892
Gm16621	ENSMUSG00000085764	1	193916253	193923511
Gm10516	ENSMUSG00000073476	1	193960780	193974895
Kcnh1	ENSMUSG00000058248	1	194014666	194334041
Hhat	ENSMUSG00000037375	1	194336710	194597413
U5	ENSMUSG00000064881	1	194571765	194571880
A730013G03Rik	ENSMUSG00000047384	1	194659363	194660913
Sertad4	ENSMUSG00000016262	1	194670625	194681946
Gm15867	ENSMUSG00000089812	1	194681122	194682660
Syt14	ENSMUSG00000016200	1	194723404	194861911
7SK	ENSMUSG00000089158	1	194824480	194824768
Diexf	ENSMUSG00000016181	1	194930597	194956445
Irf6	ENSMUSG00000026638	1	194979306	194998236
A130010J15Rik	ENSMUSG00000079144	1	194994243	195002497
Traf3ip3	ENSMUSG00000037318	1	195001700	195027897
Gm15872	ENSMUSG00000090080	1	195013569	195018205
4930570N18Rik	ENSMUSG00000089683	1	195029233	195052402
1600010F14Rik	ENSMUSG00000089688	1	195033944	195080668
Hsd11b1	ENSMUSG00000016194	1	195047824	195090248
G0s2	ENSMUSG00000009633	1	195098355	195099382
Lamb3	ENSMUSG00000026639	1	195128151	195170072
Camk1g	ENSMUSG00000016179	1	195172540	195196491
Plxna2	ENSMUSG00000026640	1	196446023	196643063
4631405K08Rik	ENSMUSG00000091593	1	195333432	195335997
Mir205	ENSMUSG00000065533	1	195333657	195333724
Gm13455	ENSMUSG00000081577	2	40142682	40143198
Gm13456	ENSMUSG00000082536	2	40411272	40412636
Gm13462	ENSMUSG00000082930	2	40813911	40814871
Gm13460	ENSMUSG00000083260	2	40854377	40854729
Gm13461	ENSMUSG00000081999	2	41842685	41844369
Gm13463	ENSMUSG00000081085	2	41980141	41980373
Lrp1b	ENSMUSG00000049252	2	40450768	42509118
SNORA17	ENSMUSG00000088512	2	40154037	40154162
Ext2	ENSMUSG00000027198	2	93535788	93662725
Accs	ENSMUSG00000040272	2	93673624	93690100
Accsl	ENSMUSG00000075023	2	93695518	93709314
Alkbh3	ENSMUSG00000040174	2	93820707	93850964
Hsd17b12	ENSMUSG00000027195	2	93872846	93998121
Ttc17	ENSMUSG00000027194	2	94140924	94246846
Api5	ENSMUSG00000027193	2	94251839	94278293
Gm13818	ENSMUSG00000081353	2	93634727	93635241
Gm1335	ENSMUSG00000083009	2	93780456	93781035
Gm13889	ENSMUSG00000087006	2	93795967	93797684
Gm13889	ENSMUSG00000075021	2	93796536	93797284
4921507L20Rik	ENSMUSG00000027196	2	93820191	93823732
E530001K10Rik	ENSMUSG00000075020	2	94092036	94104915
Itpa-ps1	ENSMUSG00000081476	2	94224659	94225255
2810002D19Rik	ENSMUSG00000045464	2	94246308	94251839
Gm13788	ENSMUSG00000083204	2	94430978	94431578
Gm13793	ENSMUSG00000087069	2	94569171	94570895
Gm13795	ENSMUSG00000080739	2	95164847	95165141
Gm13794	ENSMUSG00000084906	2	95234399	95237808
Gm13796	ENSMUSG00000083739	2	95515934	95516246
Gm13798	ENSMUSG00000081757	2	95517874	95518012
Gm13797	ENSMUSG00000083846	2	95538074	95538193
AL683878.1	ENSMUSG00000093033	2	94024184	94024287
AL732472.1	ENSMUSG00000078012	2	93738199	93738290
SNORA17	ENSMUSG00000077678	2	94462115	94462245
Mir129-2	ENSMUSG00000065511	2	94081521	94081610
SNORA17	ENSMUSG00000077281	2	94632362	94632493
Mir670	ENSMUSG00000076335	2	94101457	94101556
Gm13799	ENSMUSG00000087537	2	95678245	95680751
Gm13800	ENSMUSG00000083797	2	95911686	95911851
Gm13801	ENSMUSG00000082327	2	95973592	95973751
Lrrc4c	ENSMUSG00000050587	2	96158326	97471823
Mrps5	ENSMUSG00000027374	2	127412958	127432565
Gm16762	ENSMUSG00000085076	2	126346938	126379398
Shc4	ENSMUSG00000035109	2	125453183	125549884
Secisbp2l	ENSMUSG00000035093	2	125562722	125608606
Cops2	ENSMUSG00000027206	2	125656040	125684875
Galk2	ENSMUSG00000027207	2	125684845	125810035
4930525F21Rik	ENSMUSG00000027209	2	125809219	125977740
Hdc	ENSMUSG00000027360	2	126419403	126445035
Gabpb1	ENSMUSG00000027361	2	126453178	126502073
Fgf7	ENSMUSG00000027208	2	125860394	125916921
Dtwd1	ENSMUSG00000023330	2	125977877	125991015
Atp8b4	ENSMUSG00000060131	2	126146709	126326410
Slc27a2	ENSMUSG00000027359	2	126378143	126413979
Dusp2	ENSMUSG00000027368	2	127161895	127164112
Usp8	ENSMUSG00000027363	2	126533064	126585033
Astl	ENSMUSG00000050468	2	127164375	127183387
Fahd2a	ENSMUSG00000027371	2	127261951	127270301
Kcnip3	ENSMUSG00000079056	2	127282234	127347830
Gm17601	ENSMUSG00000090815	2	127343028	127343545
Prom2	ENSMUSG00000027376	2	127352209	127367203
Gm14212	ENSMUSG00000081894	2	126690239	126691064
Gm14229	ENSMUSG00000083648	2	127394313	127395162
Gm14245	ENSMUSG00000084006	2	127514141	127515983
Gm14244	ENSMUSG00000087162	2	127517635	127526224
Gm10766	ENSMUSG00000074822	2	127095445	127095768
Stard7	ENSMUSG00000027367	2	127095954	127124670
Tmem127	ENSMUSG00000034850	2	127073644	127086843
Mal	ENSMUSG00000027375	2	127458962	127482431
Mall	ENSMUSG00000027377	2	127530122	127555668
Usp50	ENSMUSG00000027364	2	126534832	126609196
Gm10774	ENSMUSG00000074846	2	126535090	126535293
Trpm7	ENSMUSG00000027365	2	126617301	126701966
2010106G01Rik	ENSMUSG00000027366	2	126716127	126758971
Ap4e1	ENSMUSG00000001998	2	126834453	126893645
Blvra	ENSMUSG00000001999	2	126896401	126922820
Ncaph	ENSMUSG00000034906	2	126929545	126959690
Adra2b	ENSMUSG00000058620	2	127188944	127192957
Gpat2	ENSMUSG00000046338	2	127250935	127261828
Itpripl1	ENSMUSG00000074825	2	126964508	126969178
1810024B03Rik	ENSMUSG00000044145	2	127012091	127034016
Snrnp200	ENSMUSG00000003660	2	127034122	127066187
Ciao1	ENSMUSG00000003662	2	127066674	127073552
Zfp661	ENSMUSG00000034800	2	127400398	127412830
SNORA55	ENSMUSG00000089264	2	127503406	127503463
U6	ENSMUSG00000065084	2	125935644	125935750
AL928590.1	ENSMUSG00000092918	2	126866297	126866421
7SK	ENSMUSG00000084628	2	127298753	127299044
U1	ENSMUSG00000088200	2	126460275	126460423
7SK	ENSMUSG00000089480	2	126094808	126095099
Nphp1	ENSMUSG00000027378	2	127566468	127614633
Bub1	ENSMUSG00000027379	2	127626858	127657601
1500011K16Rik	ENSMUSG00000051319	2	127617124	127618224
Gm14009	ENSMUSG00000085750	2	128015723	128030370
Gm14005	ENSMUSG00000074813	2	128021729	128255085
Gm14012	ENSMUSG00000086879	2	128063429	128065379
Acoxl	ENSMUSG00000027380	2	127664612	127949609
Bcl2l11	ENSMUSG00000027381	2	127951774	127988283
AL844481.1	ENSMUSG00000093203	2	127717724	127717849
U1	ENSMUSG00000088175	2	127915660	127915796
Prokr2	ENSMUSG00000050558	2	132163469	132211183
Rassf2	ENSMUSG00000027339	2	131815151	131855994
Prnd	ENSMUSG00000027338	2	131735693	131781866
1110034G24Rik	ENSMUSG00000044991	2	132512667	132576791
Chgb	ENSMUSG00000027350	2	132607014	132620815
Adra1d	ENSMUSG00000027335	2	131371586	131388021
4930425F17Rik	ENSMUSG00000062501	2	131473561	131474330
Erv3	ENSMUSG00000037482	2	131679414	131685483
Prnp	ENSMUSG00000079037	2	131735664	131764165
5730494N06Rik	ENSMUSG00000027341	2	132065228	132073543
Gm14232	ENSMUSG00000087405	2	130985273	130997078
Gm14233	ENSMUSG00000086329	2	131124281	131125571
Gm14284	ENSMUSG00000082044	2	131147824	131148102
Gm14283	ENSMUSG00000081652	2	131240657	131240981
Gm14304	ENSMUSG00000083671	2	131279864	131280376
Gm14285	ENSMUSG00000087524	2	131387350	131388915
Gm14280	ENSMUSG00000086831	2	131478633	131547574
5330413P13Rik	ENSMUSG00000086822	2	131645742	131673396
Gm14282	ENSMUSG00000081422	2	131671092	131671331
Gm14281	ENSMUSG00000083469	2	131672131	131673424
Lamr1-ps1	ENSMUSG00000081229	2	131729822	131730695
Gm14052	ENSMUSG00000082990	2	131925605	131926635
Gm14051	ENSMUSG00000086756	2	131970269	132045986
AV099323	ENSMUSG00000087377	2	132079093	132087069
4921508D12Rik	ENSMUSG00000027345	2	132250477	132278235
Gm14095	ENSMUSG00000086250	2	132308948	132326884
1700026D11Rik	ENSMUSG00000086379	2	132316370	132349793
AU019990	ENSMUSG00000074783	2	132423931	132478804
Rpl23a-ps4	ENSMUSG00000081445	2	132487978	132488432
Gm14099	ENSMUSG00000084089	2	132499121	132499725
Gm14098	ENSMUSG00000081662	2	132504005	132504975
Gm14097	ENSMUSG00000084839	2	132520168	132524259
Gm14104	ENSMUSG00000086575	2	132671735	132672992
Gm14102	ENSMUSG00000086478	2	132784178	132785541
Gm14101	ENSMUSG00000084393	2	132805905	132806904
Gm14103	ENSMUSG00000082940	2	132872923	132873288
Gpcpd1	ENSMUSG00000027346	2	132354818	132413465
Trmt6	ENSMUSG00000037376	2	132629943	132641791
Mcm8	ENSMUSG00000027353	2	132641877	132669933
Crls1	ENSMUSG00000027357	2	132672402	132692521
Lrrn4	ENSMUSG00000043110	2	132694041	132706627
Fermt1	ENSMUSG00000027356	2	132729915	132771772
Slc23a2	ENSMUSG00000027340	2	131878232	131970844
1700037H04Rik	ENSMUSG00000027327	2	130972060	130985817
Spef1	ENSMUSG00000027329	2	130995997	131013018
Cenpb	ENSMUSG00000068267	2	131000918	131005803
Cdc25b	ENSMUSG00000027330	2	131012685	131024233
2310035K24Rik	ENSMUSG00000068264	2	131032814	131039250
Mavs	ENSMUSG00000037523	2	131059799	131073761
Pank2	ENSMUSG00000037514	2	131088231	131124924
Rnf24	ENSMUSG00000048911	2	131123800	131178628
Smox	ENSMUSG00000027333	2	131317232	131351658
Pcna	ENSMUSG00000027342	2	132074898	132079050
Cds2	ENSMUSG00000058793	2	132088884	132137786
U1	ENSMUSG00000065050	2	132834223	132834390
U6	ENSMUSG00000064413	2	132542842	132542944
RNaseP_nuc	ENSMUSG00000089113	2	131239397	131239698
AL831731.1	ENSMUSG00000092654	2	131393747	131393818
Mir103-2	ENSMUSG00000065563	2	131113788	131113873
Gm14094	ENSMUSG00000083689	2	133025347	133025956
A430048G15Rik	ENSMUSG00000086650	2	133257831	133279098
Gm14100	ENSMUSG00000087585	2	133288854	133291520
Bmp2	ENSMUSG00000027358	2	133377895	133388621
Mir3090	ENSMUSG00000093338	2	133390444	133390530
U6	ENSMUSG00000064983	2	133410051	133410157
Gm14067	ENSMUSG00000082526	2	138742355	138742668
Btbd3	ENSMUSG00000062098	2	138082301	138415028
Gm14055	ENSMUSG00000085504	2	137114239	137154862
Gm14064	ENSMUSG00000085640	2	137489171	137654980
Gm14062	ENSMUSG00000086214	2	137695782	137702567
Gm14060	ENSMUSG00000082466	2	138279614	138280060
Gm14061	ENSMUSG00000085911	2	138415128	138474858
Gm14063	ENSMUSG00000082331	2	138448350	138448658
Gm14065	ENSMUSG00000081009	2	138697759	138698343
Mir1952	ENSMUSG00000088983	2	138645665	138645743
Gm14078	ENSMUSG00000081731	2	140781501	140781985
Gm14080	ENSMUSG00000083274	2	140953016	140953801
Gm14105	ENSMUSG00000074763	2	141055406	141061162
Gm14077	ENSMUSG00000086450	2	141056167	141112727
Fau-ps1	ENSMUSG00000082412	2	141664525	141665075
Macrod2	ENSMUSG00000068205	2	140221045	142218702
Flrt3	ENSMUSG00000051379	2	140476650	140497205
Flrt3	ENSMUSG00000079021	2	140476652	140497186
U6	ENSMUSG00000065347	2	141466226	141466332
7SK	ENSMUSG00000089318	2	142207724	142208027
Dnttip1	ENSMUSG00000017299	2	164571483	164594107
Ube2c	ENSMUSG00000001403	2	164595398	164604322
Tnnc2	ENSMUSG00000017300	2	164602661	164605467
Snx21	ENSMUSG00000050373	2	164611323	164619316
Acot8	ENSMUSG00000017307	2	164618268	164630382
Zswim3	ENSMUSG00000045822	2	164630598	164647630
Zswim1	ENSMUSG00000017764	2	164648186	164652371
1700020C07Rik	ENSMUSG00000017767	2	164651889	164654037
Neurl2	ENSMUSG00000039873	2	164656232	164658956
Ctsa	ENSMUSG00000017760	2	164658373	164666532
Pltp	ENSMUSG00000017754	2	164665018	164683211
Pcif1	ENSMUSG00000039849	2	164704804	164719954
Zfp335	ENSMUSG00000039834	2	164717382	164737257
Mmp9	ENSMUSG00000017737	2	164766280	164781350
Slc12a5	ENSMUSG00000017740	2	164786316	164825228
Ncoa5	ENSMUSG00000039804	2	164825857	164860367
Cd40	ENSMUSG00000017652	2	164881127	164898448
1700025C18Rik	ENSMUSG00000078935	2	164904193	164916250
Cdh22	ENSMUSG00000053166	2	164937007	165060353
Slc35c2	ENSMUSG00000017664	2	165102054	165113369
Elmo2	ENSMUSG00000017670	2	165113531	165151979
Zfp663	ENSMUSG00000056824	2	165176797	165194229
Zfp334	ENSMUSG00000017667	2	165199764	165213759
Ocstamp	ENSMUSG00000027670	2	165219260	165225905
Slc13a3	ENSMUSG00000018459	2	165230528	165298730
2810408M09Rik	ENSMUSG00000039725	2	165315610	165318824
Slc2a10	ENSMUSG00000027661	2	165329287	165345417
Eya2	ENSMUSG00000017897	2	165480798	165597227
Zmynd8	ENSMUSG00000039671	2	165609654	165724516
Ncoa3	ENSMUSG00000027678	2	165818136	165898742
Sulf2	ENSMUSG00000006800	2	165898589	165981163
Prex1	ENSMUSG00000039621	2	166391842	166539332
Gm11457	ENSMUSG00000086453	2	164579742	164595166
Gm11458	ENSMUSG00000085436	2	164736854	164745453
Gm11459	ENSMUSG00000087503	2	164786302	164788252
Gm14397	ENSMUSG00000086630	2	164984912	164989469
Gm14437	ENSMUSG00000085358	2	165267764	165275985
Gm11460	ENSMUSG00000081758	2	165491997	165492357
BC046401	ENSMUSG00000085274	2	165683184	165684534
Gm11465	ENSMUSG00000086820	2	165705525	165707556
Gm11461	ENSMUSG00000083264	2	165750766	165751341
Gm11462	ENSMUSG00000082924	2	165785289	165785850
Gm11463	ENSMUSG00000084816	2	165802257	165811424
Gm11464	ENSMUSG00000087351	2	165806226	165818017
Gm11466	ENSMUSG00000085618	2	166015293	166016362
Gm11467	ENSMUSG00000085046	2	166032730	166034127
Gm11468	ENSMUSG00000084840	2	166099408	166120331
Gm14268	ENSMUSG00000087617	2	166206328	166223687
5031425F14Rik	ENSMUSG00000085129	2	166272951	166284732
Gm11469	ENSMUSG00000081123	2	166325773	166326268
Gm14267	ENSMUSG00000085682	2	166327601	166331084
BX323066.1	ENSMUSG00000093174	2	164637044	164637321
AL732357.1	ENSMUSG00000093063	2	166480527	166480642
AL591712.1	ENSMUSG00000092942	2	165635081	165635380
SNORA48	ENSMUSG00000087800	2	165095546	165095676
AL589902.1	ENSMUSG00000092796	2	165733551	165733675
7SK	ENSMUSG00000089145	2	166507574	166507920
5S_rRNA	ENSMUSG00000088926	2	166015197	166015301
7SK	ENSMUSG00000088226	2	164587159	164587474
Trp53rk	ENSMUSG00000042854	2	166618031	166625005
U6	ENSMUSG00000088063	2	166594245	166594347
Arfgef2	ENSMUSG00000074582	2	166631088	166723552
Gm14401	ENSMUSG00000078872	2	176859025	176872052
Gm14410	ENSMUSG00000078870	2	176968158	176991126
Gm14409	ENSMUSG00000078869	2	177049359	177051741
Gm14412	ENSMUSG00000078868	2	177099225	177109012
Gm14418	ENSMUSG00000078867	2	177171829	177183025
Gm14420	ENSMUSG00000078866	2	177249438	177262834
Gm14403	ENSMUSG00000067480	2	177282920	177297014
Gm14406	ENSMUSG00000078865	2	177353909	177362915
Gm14322	ENSMUSG00000078864	2	177493993	177505177
Gm14325	ENSMUSG00000078863	2	177566496	177575041
Gm14327	ENSMUSG00000074521	2	177631801	177640489
C330013J21Rik	ENSMUSG00000074529	2	177638045	177660318
Gm14326	ENSMUSG00000078862	2	177670698	177692002
Etohi1	ENSMUSG00000074519	2	177757989	177768727
Zfp931	ENSMUSG00000078861	2	177802400	177813181
Phactr3	ENSMUSG00000027525	2	177853680	178073197
Sycp2	ENSMUSG00000060445	2	178079998	178142390
Ppp1r3d	ENSMUSG00000049999	2	178145911	178149177
9030418K01Rik	ENSMUSG00000070476	2	178149229	178159133
Cdh26	ENSMUSG00000039155	2	178165236	178222071
Gm14314	ENSMUSG00000082215	2	178754824	178755838
Gm14428	ENSMUSG00000083702	2	177715239	177717405
Gm17513	ENSMUSG00000090944	2	177758513	177763441
Gm14421	ENSMUSG00000083111	2	176838221	176841543
Gm14407	ENSMUSG00000082023	2	176870061	176870507
Gm14415	ENSMUSG00000082377	2	176888269	176891193
Gm14411	ENSMUSG00000082765	2	176910168	176912414
Gm14416	ENSMUSG00000082724	2	176923365	176927036
Gm14413	ENSMUSG00000081590	2	176951995	176957575
Gm14400	ENSMUSG00000083817	2	177010178	177013668
Gm14404	ENSMUSG00000082343	2	177204607	177207641
Gm14414	ENSMUSG00000083619	2	177244910	177245589
Gm16363	ENSMUSG00000085513	2	177326386	177327262
Gm14324	ENSMUSG00000080709	2	177469005	177473462
Gm14429	ENSMUSG00000081574	2	177586857	177590208
Gm14323	ENSMUSG00000082901	2	177627343	177627969
4930591A17Rik	ENSMUSG00000039138	2	179149641	179151587
Cdh4	ENSMUSG00000000305	2	179177136	179634078
Gm10711	ENSMUSG00000074518	2	179628614	179629398
Taf4a	ENSMUSG00000039117	2	179646851	179711351
Lsm14b	ENSMUSG00000039108	2	179759692	179770170
Psma7	ENSMUSG00000027566	2	179771078	179777138
Ss18l1	ENSMUSG00000039086	2	179777214	179804906
Gtpbp5	ENSMUSG00000039069	2	179805293	179820607
Gm14292	ENSMUSG00000061897	2	178912130	178912585
Gm14293	ENSMUSG00000081481	2	178975195	178975771
Gm14294	ENSMUSG00000081882	2	179098998	179099748
Gm14300	ENSMUSG00000083410	2	179347327	179348272
4921531C22Rik	ENSMUSG00000085704	2	179710698	179713718
Gm14299	ENSMUSG00000082850	2	179727893	179728289
AL663067.1	ENSMUSG00000080507	2	179725502	179725587
Hrh3	ENSMUSG00000039059	2	179834170	179839193
Gm17180	ENSMUSG00000090589	2	179834618	179836207
Osbpl2	ENSMUSG00000039050	2	179854011	179897385
Adrm1	ENSMUSG00000039041	2	179906190	179910991
Lama5	ENSMUSG00000015647	2	179911078	179960564
Rps21	ENSMUSG00000039001	2	179992082	179993150
Cables2	ENSMUSG00000038990	2	179993245	180008201
BC066135	ENSMUSG00000038980	2	180012351	180024584
Gata5	ENSMUSG00000015627	2	180059838	180069404
Gm14318	ENSMUSG00000056061	2	180067562	180075437
Slco4a1	ENSMUSG00000038963	2	180190950	180209572
Ntsr1	ENSMUSG00000027568	2	180234681	180279685
1600027N09Rik	ENSMUSG00000027569	2	180316009	180321009
Ogfr	ENSMUSG00000049401	2	180323950	180330541
Col9a3	ENSMUSG00000027570	2	180332495	180356894
Tcfl5	ENSMUSG00000038932	2	180356661	180377413
Dido1	ENSMUSG00000038914	2	180392669	180444704
2310003C23Rik	ENSMUSG00000027573	2	180444822	180453438
Slc17a9	ENSMUSG00000023393	2	180459968	180476985
Bhlhe23	ENSMUSG00000045493	2	180509086	180511605
B230312C02Rik	ENSMUSG00000084843	2	180105196	180120590
Gm14343	ENSMUSG00000087550	2	180500919	180510108
Gm14340	ENSMUSG00000074507	2	180553048	180559335
Mir3091	ENSMUSG00000092827	2	179992241	179992316
U6	ENSMUSG00000064422	2	180432768	180432874
Mir133a-2	ENSMUSG00000065460	2	180133084	180133187
Mir1a-1	ENSMUSG00000070144	2	180123753	180123829
Chmp4c	ENSMUSG00000027536	3	10366907	10391005
Snx16	ENSMUSG00000027534	3	10417819	10440124
Gm8910	ENSMUSG00000069106	3	11013518	11015193
Pmp2	ENSMUSG00000052468	3	10179851	10183885
Fabp9	ENSMUSG00000027528	3	10193626	10197222
Fabp4	ENSMUSG00000062515	3	10204347	10208576
Fabp12	ENSMUSG00000027530	3	10244209	10301183
Impa1	ENSMUSG00000027531	3	10313540	10331439
Slc10a5	ENSMUSG00000058921	3	10331734	10335656
Zfand1	ENSMUSG00000039795	3	10339953	10351317
AC127294.1	ENSMUSG00000093022	3	11154337	11154437
SNORA17	ENSMUSG00000087858	3	10975469	10975586
Gm8935	ENSMUSG00000045699	3	12855996	12856403
Gm2464	ENSMUSG00000078587	3	13471906	13474596
Ralyl	ENSMUSG00000039717	3	13776848	14182287
7SK	ENSMUSG00000088546	3	13845686	13845980
7SK	ENSMUSG00000084684	3	14029482	14029762
SNORA17	ENSMUSG00000089231	3	14267315	14267439
U7	ENSMUSG00000088540	3	14401731	14401788
Gm17119	ENSMUSG00000090300	3	14564402	14564681
Gm5843	ENSMUSG00000084092	3	14722416	14729626
Lrrcc1	ENSMUSG00000027550	3	14533788	14572658
E2f5	ENSMUSG00000027552	3	14578671	14606308
1810022K09Rik	ENSMUSG00000078784	3	14606320	14611221
Car13	ENSMUSG00000027555	3	14641727	14663002
Slc7a12	ENSMUSG00000039710	3	14480697	14505830
Tbl1xr1	ENSMUSG00000027630	3	21975574	22115516
RNaseP_nuc	ENSMUSG00000087775	3	22150296	22150585
AC138200.1	ENSMUSG00000080481	3	23112334	23112416
SNORA17	ENSMUSG00000088846	3	22308845	22308973
Gm10259	ENSMUSG00000069083	3	25109938	25111352
Gm7536	ENSMUSG00000057036	3	24231969	24232474
7SK	ENSMUSG00000088115	3	24617638	24617903
U6	ENSMUSG00000070227	3	24460996	24461102
Gm15496	ENSMUSG00000085953	3	31184509	31215813
Gm15574	ENSMUSG00000081883	3	32778933	32779530
Kcnmb3	ENSMUSG00000091091	3	32371243	32390891
Phc3	ENSMUSG00000037652	3	30798217	30868337
Prkci	ENSMUSG00000037643	3	30894669	30951663
Skil	ENSMUSG00000027660	3	30993980	31021499
Cldn11	ENSMUSG00000037625	3	31048868	31063246
Slc7a14	ENSMUSG00000069072	3	31101832	31209300
Kcnmb2	ENSMUSG00000037610	3	31801429	32099102
Zmat3	ENSMUSG00000027663	3	32233718	32264600
4930429B21Rik	ENSMUSG00000049507	3	32264697	32266358
Pik3ca	ENSMUSG00000027665	3	32296593	32367408
Ndufb5	ENSMUSG00000027673	3	32635912	32650488
Usp13	ENSMUSG00000056900	3	32716468	32836993
Zfp639	ENSMUSG00000027667	3	32414217	32419607
Mfn1	ENSMUSG00000027668	3	32428387	32478161
Gnb4	ENSMUSG00000027669	3	32479254	32515507
Actl6a	ENSMUSG00000027671	3	32607468	32625890
Mrpl47	ENSMUSG00000037531	3	32624319	32636069
Pex5l	ENSMUSG00000027674	3	32848553	33042169
4930419G24Rik	ENSMUSG00000087625	3	32923699	32987529
U4	ENSMUSG00000084665	3	32910880	32911036
Ttc14	ENSMUSG00000027677	3	33698877	33713782
Ccdc39	ENSMUSG00000027676	3	33711284	33743232
SNORA48	ENSMUSG00000088260	3	33291979	33292121
SNORA17	ENSMUSG00000077559	3	33857991	33858122
Gm9791	ENSMUSG00000044434	3	33903939	33904385
Sox2ot	ENSMUSG00000090828	3	34003360	34581541
Gm5708	ENSMUSG00000092249	3	34082229	34083114
Gm20446	ENSMUSG00000092196	3	34197440	34221211
Fxr1	ENSMUSG00000027680	3	33919001	33968264
Dnajc19	ENSMUSG00000027679	3	33954942	33980243
Gm20514	ENSMUSG00000092355	3	34223741	34250637
Gm20515	ENSMUSG00000092242	3	34326295	34334019
Sox2	ENSMUSG00000074637	3	34548927	34551383
Mir1897	ENSMUSG00000084530	3	34537386	34537464
AC158547.1	ENSMUSG00000093499	3	35224536	35224627
AC137708.1	ENSMUSG00000093307	3	34489443	34489530
Dcun1d1	ENSMUSG00000027708	3	35791900	35836367
Atp11b	ENSMUSG00000037400	3	35653056	35755196
U6	ENSMUSG00000064834	3	35634295	35634399
P2ry1	ENSMUSG00000027765	3	60806717	60812901
B430305J03Rik	ENSMUSG00000053706	3	61166172	61169873
Rap2b	ENSMUSG00000036894	3	61168429	61172625
Arhgef26	ENSMUSG00000036885	3	62142266	62266143
Dhx36	ENSMUSG00000027770	3	62273961	62310926
Gpr149	ENSMUSG00000043441	3	62332999	62409062
U7	ENSMUSG00000089032	3	61207710	61207757
Gm17359	ENSMUSG00000091685	3	79149298	79268051
Fnip2	ENSMUSG00000061175	3	79259893	79371718
4930589L23Rik	ENSMUSG00000068957	3	79372114	79376502
Ppid	ENSMUSG00000027804	3	79395264	79407572
Etfdh	ENSMUSG00000027809	3	79407710	79432785
4930579G24Rik	ENSMUSG00000027811	3	79433001	79436739
Rxfp1	ENSMUSG00000034009	3	79448638	79541716
Tmem144	ENSMUSG00000027956	3	79617070	79646584
Fam198b	ENSMUSG00000027955	3	79688455	79750202
Gria2	ENSMUSG00000033981	3	80488858	80606713
Glrb	ENSMUSG00000028020	3	80647521	80717582
Gm17731	ENSMUSG00000091291	3	80719733	80721354
Pdgfc	ENSMUSG00000028019	3	80840338	81017962
Gm3513	ENSMUSG00000089746	3	79355236	79356115
Gm6706	ENSMUSG00000087123	3	80203271	80203588
Gm16000	ENSMUSG00000085106	3	80841330	80844359
U6	ENSMUSG00000077461	3	79638855	79638957
AC163349.1	ENSMUSG00000093226	3	80496125	80496235
Fgg	ENSMUSG00000033860	3	82811781	82818975
Fga	ENSMUSG00000028001	3	82830075	82838036
Fgb	ENSMUSG00000033831	3	82846169	82853725
4930564K09Rik	ENSMUSG00000086273	3	82680627	82747560
Gm6525	ENSMUSG00000078175	3	83978696	83979016
Gm8813	ENSMUSG00000085625	3	84356780	84357374
Plrg1	ENSMUSG00000027998	3	82859444	82876277
Gm10710	ENSMUSG00000074517	3	82929198	82933168
Sfrp2	ENSMUSG00000027996	3	83570243	83578238
Tlr2	ENSMUSG00000027995	3	83640195	83645689
D930015E06Rik	ENSMUSG00000033767	3	83702131	83844083
Mnd1	ENSMUSG00000033752	3	83891856	83959708
Trim2	ENSMUSG00000027993	3	83964361	84109368
Fhdc1	ENSMUSG00000041842	3	84247947	84284351
Arfip1	ENSMUSG00000074513	3	84300015	85691438
Tigd4	ENSMUSG00000047819	3	84397496	84400954
Tmem154	ENSMUSG00000056498	3	84470114	84508497
Fbxw7	ENSMUSG00000028086	3	84619190	84783120
Gm16790	ENSMUSG00000085848	3	83577775	83593878
7SK	ENSMUSG00000084596	3	83438499	83438796
U6	ENSMUSG00000088597	3	83506174	83506280
Gm12449	ENSMUSG00000081183	3	99267515	99267748
M6pr-ps	ENSMUSG00000080832	3	99303947	99306568
Gm12448	ENSMUSG00000083938	3	99348370	99348891
Gm12450	ENSMUSG00000083504	3	99532020	99532487
Rpl36-ps7	ENSMUSG00000080754	3	99812283	99812597
Gm12457	ENSMUSG00000082763	3	99882400	99882567
B930086A06Rik	ENSMUSG00000085244	3	99904607	99910818
Gm12464	ENSMUSG00000081440	3	100217483	100218483
4930406D18Rik	ENSMUSG00000086923	3	100230328	100241677
Gm12474	ENSMUSG00000053957	3	100293587	100327843
Gm12485	ENSMUSG00000083842	3	100484188	100484478
Gm12488	ENSMUSG00000082000	3	100759364	100759862
Wars2	ENSMUSG00000004233	3	98944991	99043109
Tbx15	ENSMUSG00000027868	3	99044304	99158182
Spag17	ENSMUSG00000027867	3	99689329	99947245
Wdr3	ENSMUSG00000033285	3	99942103	99966330
Gdap2	ENSMUSG00000027865	3	99966304	100010904
Ttf2	ENSMUSG00000033222	3	100742783	100773586
Cd101	ENSMUSG00000086564	3	100797453	100833479
Ptgfrn	ENSMUSG00000027864	3	100844155	100914201
Fam46c	ENSMUSG00000044468	3	100255551	100293247
Man1a2	ENSMUSG00000008763	3	100366130	100489426
Vtcn1	ENSMUSG00000051076	3	100629382	100699602
Trim45	ENSMUSG00000033233	3	100726125	100740848
SNORD81	ENSMUSG00000064573	3	100107211	100107287
U6	ENSMUSG00000064890	3	99511663	99511770
7SK	ENSMUSG00000087759	3	100542375	100542636
Gm12486	ENSMUSG00000082415	3	101010782	101011322
Tpt1-ps1	ENSMUSG00000083546	3	101037383	101037818
Gm12490	ENSMUSG00000081569	3	101064840	101065399
Cd2	ENSMUSG00000027863	3	101079822	101091862
Gm10355	ENSMUSG00000072381	3	101110484	101111002
Igsf3	ENSMUSG00000042035	3	101181048	101266983
Atp1a1	ENSMUSG00000033161	3	101380142	101408586
Slc16a1	ENSMUSG00000032902	3	104442591	104462385
Fam19a3	ENSMUSG00000055865	3	104570324	104584758
Ppm1j	ENSMUSG00000002228	3	104583974	104588936
Rhoc	ENSMUSG00000002233	3	104591929	104597377
Mov10	ENSMUSG00000002227	3	104597754	104621481
Capza1	ENSMUSG00000070372	3	104625697	104667423
St7l	ENSMUSG00000045576	3	104667421	104730812
Wnt2b	ENSMUSG00000027840	3	104747723	104764627
Cttnbp2nl	ENSMUSG00000062127	3	104804833	104856064
4930564D02Rik	ENSMUSG00000051788	3	104869762	104881724
Kcnd3	ENSMUSG00000040896	3	105255248	105476920
Ddx20	ENSMUSG00000027905	3	105481178	105490492
6530418L21Rik	ENSMUSG00000048458	3	105507517	105523760
Rap1a	ENSMUSG00000068798	3	105530185	105604248
Adora3	ENSMUSG00000000562	3	105673776	105711846
Adora3	ENSMUSG00000074344	3	105673825	105726954
I830077J02Rik	ENSMUSG00000074342	3	105728809	105735582
Atp5f1	ENSMUSG00000000563	3	105745616	105763017
Wdr77	ENSMUSG00000000561	3	105762287	105787518
Ovgp1	ENSMUSG00000074340	3	105776629	105790341
1700027A23Rik	ENSMUSG00000010136	3	105799875	105817523
Chi3l7	ENSMUSG00000043873	3	105819837	105835813
Gm4540	ENSMUSG00000092072	3	105837628	105837921
Chia	ENSMUSG00000062778	3	105916147	105935038
Chi3l3	ENSMUSG00000040809	3	105950472	106022425
Chi3l4	ENSMUSG00000063779	3	106004408	106022425
BC051070	ENSMUSG00000027902	3	106190306	106209100
2010016I18Rik	ENSMUSG00000091575	3	106284931	106286355
Dennd2d	ENSMUSG00000027901	3	106285323	106305948
Cept1	ENSMUSG00000040774	3	106305178	106350720
Dram2	ENSMUSG00000027900	3	106350611	106377763
Gm6485	ENSMUSG00000089999	3	104555645	104556083
1700095B22Rik	ENSMUSG00000074346	3	105244513	105255873
U6	ENSMUSG00000084653	3	104405081	104405162
U6	ENSMUSG00000089452	3	104504793	104504882
4933421E11Rik	ENSMUSG00000056260	3	106487905	106539495
Cd53	ENSMUSG00000040747	3	106561779	106593067
Olfr266	ENSMUSG00000043529	3	106624474	106625500
Kcna3	ENSMUSG00000047959	3	106839080	106841047
AI504432	ENSMUSG00000056145	3	106842422	106854070
A930002I21Rik	ENSMUSG00000050179	3	106893880	106901319
Kcna2	ENSMUSG00000040724	3	106904485	106909797
Kcna10	ENSMUSG00000042861	3	106985974	106998639
Cym	ENSMUSG00000046213	3	107014211	107024650
Prok1	ENSMUSG00000070368	3	107038449	107042625
Hbxip	ENSMUSG00000087260	3	107081776	107086997
Slc16a4	ENSMUSG00000027896	3	107094148	107115033
Rbm15	ENSMUSG00000048109	3	107128863	107136591
7SK	ENSMUSG00000084640	3	107218781	107219113
Kcnc4	ENSMUSG00000027895	3	107241221	107261816
Slc6a17	ENSMUSG00000027894	3	107270461	107320936
Ubl4b	ENSMUSG00000055891	3	107356616	107357991
Alx3	ENSMUSG00000092379	3	107397949	107408792
Alx3	ENSMUSG00000014603	3	107397949	107408687
Fam40a	ENSMUSG00000014601	3	107415450	107434628
Gm10961	ENSMUSG00000078604	3	107434240	107436008
Ahcyl1	ENSMUSG00000027893	3	107466036	107499478
Csf1	ENSMUSG00000014599	3	107543966	107563387
Eps8l3	ENSMUSG00000040600	3	107680148	107695817
Gstm5	ENSMUSG00000004032	3	107698739	107701604
4933431E20Rik	ENSMUSG00000086968	3	107691768	107699131
Gstm7	ENSMUSG00000004035	3	107729252	107734735
Gstm6	ENSMUSG00000068762	3	107741765	107746667
Gstm3	ENSMUSG00000004038	3	107745251	107772201
Gstm2	ENSMUSG00000040562	3	107784620	107789371
Gm12489	ENSMUSG00000082720	3	107722580	107722727
Gm12494	ENSMUSG00000089664	3	107746163	107756354
Gm12497	ENSMUSG00000049231	3	107782550	107782786
Gstm1	ENSMUSG00000058135	3	107815173	107820891
Gstm4	ENSMUSG00000027890	3	107843326	107847812
Gm12498	ENSMUSG00000087357	3	107821212	107828167
Gm12502	ENSMUSG00000083627	3	107822803	107823246
Gm12499	ENSMUSG00000081688	3	107832518	107834279
SNORA71	ENSMUSG00000064569	3	107836944	107837074
Ampd2	ENSMUSG00000027889	3	107876980	107889569
Gm12500	ENSMUSG00000056411	3	107888894	107890927
Gnat2	ENSMUSG00000009108	3	107895707	107904350
Gnai3	ENSMUSG00000000001	3	107910198	107949064
Gpr61	ENSMUSG00000046793	3	107951239	107957800
Amigo1	ENSMUSG00000050947	3	107989253	107995204
Gm12524	ENSMUSG00000085318	3	107969361	107988825
Cyb561d1	ENSMUSG00000048796	3	107998605	108004130
Atxn7l2	ENSMUSG00000048997	3	108005140	108013852
Sypl2	ENSMUSG00000027887	3	108014390	108029566
Gm12501	ENSMUSG00000083462	3	108042301	108042829
1700010K24Rik	ENSMUSG00000085102	3	108051827	108059903
Psma5	ENSMUSG00000068749	3	108059844	108082892
Sort1	ENSMUSG00000068747	3	108087009	108164429
Gm12523	ENSMUSG00000084863	3	108086816	108087761
Mybphl	ENSMUSG00000068745	3	108167829	108182974
Gm12525	ENSMUSG00000078601	3	108164469	108165174
Psrc1	ENSMUSG00000068744	3	108186757	108191149
Celsr2	ENSMUSG00000068740	3	108193769	108218470
Gm12522	ENSMUSG00000074281	3	108182195	108186659
4833424O15Rik	ENSMUSG00000033342	3	117278145	117392425
Snx7	ENSMUSG00000028007	3	117484415	117571854
Dpyd	ENSMUSG00000033308	3	118265047	119135836
snoCD11	ENSMUSG00000089572	3	119038815	119038884
AC122183.1	ENSMUSG00000093000	3	118137639	118137748
AC115933.1	ENSMUSG00000093054	3	117551471	117551570
Mir137	ENSMUSG00000065569	3	118136761	118136862
Bcar3	ENSMUSG00000028121	3	122122698	122233098
Fnbp1l	ENSMUSG00000039735	3	122241637	122322585
Pde5a	ENSMUSG00000053965	3	122432076	122562292
Fabp2	ENSMUSG00000023057	3	122597990	122602424
Gm10959	ENSMUSG00000078590	3	122615988	122622278
1810037I17Rik	ENSMUSG00000054091	3	122627280	122629111
Usp53	ENSMUSG00000039701	3	122636519	122687422
Myoz2	ENSMUSG00000028116	3	122709124	122737908
Synpo2	ENSMUSG00000050315	3	122779437	122939067
Sec24d	ENSMUSG00000039234	3	122970414	123068553
Mettl14	ENSMUSG00000028114	3	123067563	123088908
Prss12	ENSMUSG00000027978	3	123149831	123209520
Ndst3	ENSMUSG00000027977	3	123229084	123393770
Gm9372	ENSMUSG00000090474	3	123994977	123995423
Tram1l1	ENSMUSG00000044528	3	124023955	124026178
Gm9364	ENSMUSG00000091611	3	122564802	122565594
Gm15400	ENSMUSG00000080842	3	123464247	123464853
Gm15399	ENSMUSG00000081939	3	123687015	123687981
4933405D12Rik	ENSMUSG00000086397	3	122567655	122627034
Snora24	ENSMUSG00000092730	3	123210855	123210984
U6	ENSMUSG00000065132	3	123446215	123446321
AC121540.1	ENSMUSG00000076949	3	122718177	122718286
U1	ENSMUSG00000087743	3	122167645	122167800
U6atac	ENSMUSG00000080545	3	123094032	123094161
Negr1	ENSMUSG00000040037	3	156224758	156979409
4930566N20Rik	ENSMUSG00000054773	3	156870626	156871824
Zranb2	ENSMUSG00000028180	3	157197124	157211354
Ptger3	ENSMUSG00000040016	3	157229856	157307722
Cth	ENSMUSG00000028179	3	157557212	157588041
Ankrd13c	ENSMUSG00000039988	3	157610378	157670288
Srsf11	ENSMUSG00000055436	3	157673437	157699603
Lrrc40	ENSMUSG00000063052	3	157699626	157731442
Lrrc7	ENSMUSG00000028176	3	157745859	158225185
Gm15578	ENSMUSG00000083122	3	156479001	156479475
Gm15577	ENSMUSG00000086708	3	156566827	156583744
1810013D15Rik	ENSMUSG00000028177	3	157588233	157590111
U6	ENSMUSG00000064510	3	157028962	157029068
U6	ENSMUSG00000064557	3	157061226	157061332
U6	ENSMUSG00000065172	3	156900189	156900295
Mir186	ENSMUSG00000065431	3	157207243	157207313
SNORA17	ENSMUSG00000077581	3	156873893	156874024
AC170189.1	ENSMUSG00000093095	3	156732338	156732418
2610301B20Rik	ENSMUSG00000059482	4	10801645	10826572
Plekhf2	ENSMUSG00000049969	4	10915809	10935074
2310030N02Rik	ENSMUSG00000050323	4	10978192	11003352
Trp53inp1	ENSMUSG00000028211	4	11083578	11101526
Ccne2	ENSMUSG00000028212	4	11118498	11131926
Ints8	ENSMUSG00000040738	4	11126305	11181405
Dpy19l4	ENSMUSG00000045205	4	11188462	11249284
Esrp1	ENSMUSG00000040728	4	11259080	11313930
Gm17283	ENSMUSG00000067549	4	11336959	11407948
1110037F02Rik	ENSMUSG00000040720	4	11413105	11477831
Rad54b	ENSMUSG00000078773	4	11486096	11542952
Rad54b	ENSMUSG00000066307	4	11506812	11511983
Gem	ENSMUSG00000028214	4	11631604	11641899
Cdh17	ENSMUSG00000028217	4	11685294	11745042
Pdp1	ENSMUSG00000049225	4	11885331	11893599
Gm10604	ENSMUSG00000073995	4	11906707	11908412
Tmem67	ENSMUSG00000049488	4	11966502	12017167
C430048L16Rik	ENSMUSG00000052137	4	12016586	12023390
Rbm12b	ENSMUSG00000046667	4	12067411	12073878
Fam92a	ENSMUSG00000028218	4	12080556	12099162
Gm16652	ENSMUSG00000086492	4	11249091	11270100
Gm17454	ENSMUSG00000090438	4	11907816	11915618
Gm11828	ENSMUSG00000081715	4	10873755	10874240
Gm11827	ENSMUSG00000086765	4	11049952	11054145
Gm11829	ENSMUSG00000083025	4	11060474	11060755
Gm11830	ENSMUSG00000081490	4	11071857	11072417
Gm11821	ENSMUSG00000081884	4	11327493	11328471
Gm11822	ENSMUSG00000082255	4	11347497	11347911
Gm11831	ENSMUSG00000086625	4	11428603	11429986
Gm11832	ENSMUSG00000086103	4	11538286	11542154
Gm11833	ENSMUSG00000084046	4	11576794	11577646
1700123M08Rik	ENSMUSG00000085614	4	11893712	11921427
Gm11840	ENSMUSG00000085027	4	11926621	11936190
Gm11842	ENSMUSG00000085467	4	11954652	11968041
Gm11839	ENSMUSG00000083246	4	12041431	12043383
Gm11841	ENSMUSG00000081593	4	12052437	12054399
Gm11843	ENSMUSG00000082676	4	12058698	12059122
Gm11847	ENSMUSG00000060989	4	12159927	12165171
Gm11846	ENSMUSG00000085909	4	12198546	12241730
AL772167.1	ENSMUSG00000080359	4	11876034	11876097
7SK	ENSMUSG00000084518	4	11855571	11855886
n-R5s182	ENSMUSG00000065823	4	12739853	12739959
U1	ENSMUSG00000089185	4	11206412	11206566
Gm11818	ENSMUSG00000055963	4	12833985	12908618
Gm11820	ENSMUSG00000086227	4	13003287	13023953
AL772302.1	ENSMUSG00000080663	4	13194132	13194197
Gm11819	ENSMUSG00000081327	4	13371917	13372288
Gm11826	ENSMUSG00000083328	4	13409863	13410382
Cnbd1	ENSMUSG00000073991	4	18787601	19049673
Cngb3	ENSMUSG00000056494	4	19207997	19437770
Cpne3	ENSMUSG00000028228	4	19446401	19497255
Fam82b	ENSMUSG00000028229	4	19502309	19534079
Gm12353	ENSMUSG00000078772	4	19532598	19578277
Wwp1	ENSMUSG00000041058	4	19535450	19636140
Slc7a13	ENSMUSG00000041052	4	19745872	19769365
Atp6v0d2	ENSMUSG00000028238	4	19803988	19849752
Ttpa	ENSMUSG00000073988	4	19935085	19957932
Ggh	ENSMUSG00000073987	4	19968857	19993897
Nkain3	ENSMUSG00000055761	4	20046021	20706013
4930598A11Rik	ENSMUSG00000090934	4	19959993	19968711
Gm11867	ENSMUSG00000087402	4	18334496	18818989
Gm11868	ENSMUSG00000050550	4	18771349	18772928
Gm12392	ENSMUSG00000083005	4	18891711	18892648
Gm12393	ENSMUSG00000083105	4	19186243	19187090
Gm11877	ENSMUSG00000082320	4	19225480	19226331
Gm12354	ENSMUSG00000086071	4	19643879	19647346
4930480G23Rik	ENSMUSG00000086332	4	19906592	19912535
Gm11872	ENSMUSG00000086017	4	20270853	20274965
Gm11873	ENSMUSG00000081964	4	20318243	20319546
7SK	ENSMUSG00000089578	4	18635895	18636180
7SK	ENSMUSG00000089090	4	19441637	19441926
7SK	ENSMUSG00000088500	4	18657364	18657695
Gm11871	ENSMUSG00000083315	4	20937027	20938087
Mms22l	ENSMUSG00000045751	4	24423598	24530097
Klhl32	ENSMUSG00000040387	4	24539701	24778271
Ndufaf4	ENSMUSG00000028261	4	24825230	24832148
Gm11884	ENSMUSG00000087098	4	23187931	23319650
Gm11886	ENSMUSG00000081997	4	23349660	23349962
Gm11887	ENSMUSG00000083727	4	23367165	23367394
Gm11888	ENSMUSG00000083785	4	23411967	23413167
Gm11889	ENSMUSG00000082876	4	23444509	23445587
Gm11890	ENSMUSG00000084179	4	23587075	23587491
Gm11892	ENSMUSG00000083154	4	24165247	24166448
Gm11891	ENSMUSG00000081148	4	24350624	24352339
Gm11899	ENSMUSG00000087399	4	24719827	24727457
AL772326.1	ENSMUSG00000089323	4	23553803	23553892
AL671913.1	ENSMUSG00000077873	4	24616793	24616873
Epha7	ENSMUSG00000028289	4	28740281	28894649
Gm11910	ENSMUSG00000084073	4	28518803	28519721
Gm11908	ENSMUSG00000082359	4	28413262	28413608
Gm11909	ENSMUSG00000081579	4	28487098	28487856
Gm11912	ENSMUSG00000083214	4	28519726	28519989
Gm11913	ENSMUSG00000081011	4	28539476	28539892
Gm11915	ENSMUSG00000086774	4	28741447	28742226
Gm11917	ENSMUSG00000087316	4	28995229	29015961
Gm11916	ENSMUSG00000086339	4	29017755	29018812
Gm11918	ENSMUSG00000080911	4	29053096	29053274
Gm11919	ENSMUSG00000082486	4	29122670	29123390
Gm11923	ENSMUSG00000082058	4	29417306	29417813
Gm11925	ENSMUSG00000080771	4	30120797	30121331
Gm11924	ENSMUSG00000087180	4	30359262	30450933
1700009N14Rik	ENSMUSG00000028287	4	39397328	39398809
Aco1	ENSMUSG00000028405	4	40090114	40146042
Ddx58	ENSMUSG00000040296	4	40150806	40186861
Topors	ENSMUSG00000036822	4	40206634	40216883
Ndufb6	ENSMUSG00000071014	4	40217624	40226454
Tmem215	ENSMUSG00000046593	4	40419213	40424201
Aptx	ENSMUSG00000028411	4	40629415	40650227
Dnaja1	ENSMUSG00000028410	4	40669183	40684182
Smu1	ENSMUSG00000028409	4	40683575	40704956
B4galt1	ENSMUSG00000028413	4	40751635	40801038
Spink4	ENSMUSG00000028415	4	40867085	40878428
Bag1	ENSMUSG00000028416	4	40883431	40895314
Chmp5	ENSMUSG00000028419	4	40895440	40912336
Nfx1	ENSMUSG00000028423	4	40917939	40973026
Aqp7	ENSMUSG00000028427	4	40980107	40995172
Aqp3	ENSMUSG00000028435	4	41039755	41045216
Nol6	ENSMUSG00000028430	4	41061460	41071488
Ube2r2	ENSMUSG00000036241	4	41082776	41140413
Ubap2	ENSMUSG00000028433	4	41141346	41222177
Gm6297	ENSMUSG00000091395	4	40667187	40669431
Gm17094	ENSMUSG00000090839	4	39345078	39397282
Gm12385	ENSMUSG00000082302	4	39714651	39715445
Gm12384	ENSMUSG00000083271	4	39770463	39771381
Gm12386	ENSMUSG00000082022	4	39791220	39791907
Gm12387	ENSMUSG00000084220	4	39842241	39843195
Gm12388	ENSMUSG00000083202	4	40016134	40018020
Gm12389	ENSMUSG00000081352	4	40063849	40064266
2010003O02Rik	ENSMUSG00000028407	4	40216602	40217973
4930509K18Rik	ENSMUSG00000087137	4	40260265	40264752
4933428C19Rik	ENSMUSG00000086355	4	40429873	40472581
Gm12391	ENSMUSG00000081720	4	40625365	40625811
Gm12390	ENSMUSG00000082008	4	40663628	40664024
Gm12396	ENSMUSG00000056412	4	40722292	40722597
Gm12397	ENSMUSG00000081309	4	40859774	40860388
Gm12402	ENSMUSG00000081437	4	41079544	41079877
Gm12403	ENSMUSG00000082186	4	41115687	41116637
Gm12401	ENSMUSG00000081866	4	41199650	41199877
Mir207	ENSMUSG00000065452	4	40669950	40670028
AL833775.1	ENSMUSG00000092865	4	40797177	40797259
U7	ENSMUSG00000088526	4	39928530	39928591
SNORD121A	ENSMUSG00000089265	4	41150090	41150166
SNORD121A	ENSMUSG00000089308	4	41158535	41158615
U2	ENSMUSG00000088339	4	39812720	39812801
SNORA17	ENSMUSG00000077738	4	39242496	39242621
Mir3094	ENSMUSG00000092862	4	40940728	40940791
U6	ENSMUSG00000087730	4	41119775	41119877
U6	ENSMUSG00000088154	4	40997253	40997359
Mir5123	ENSMUSG00000092809	4	40797089	40797171
AL833775.2	ENSMUSG00000092971	4	40797353	40797435
SNORA40	ENSMUSG00000089585	4	40405972	40406066
AL807823.1	ENSMUSG00000093562	4	41160809	41160886
Dbc1	ENSMUSG00000028351	4	68422548	68615431
Gm11249	ENSMUSG00000083087	4	67591915	67592773
Gm11751	ENSMUSG00000086364	4	67684065	67798147
Tcp1-ps1	ENSMUSG00000081231	4	67962280	67964324
Gm12911	ENSMUSG00000086790	4	67973691	67982995
Gm11404	ENSMUSG00000082553	4	68952655	68956155
U6	ENSMUSG00000065815	4	68771705	68771811
BX649539.1	ENSMUSG00000080423	4	67535694	67535752
U1	ENSMUSG00000064762	4	67843566	67843736
Gm11221	ENSMUSG00000082998	4	69353001	69353685
Gm11222	ENSMUSG00000085627	4	69514981	69515718
Gm11223	ENSMUSG00000046341	4	69586235	69587205
Gm11224	ENSMUSG00000084342	4	69615200	69616310
Gm11225	ENSMUSG00000082368	4	69708191	69709239
Cdk5rap2	ENSMUSG00000039298	4	69877890	70071477
Gm11226	ENSMUSG00000080902	4	69909670	69910407
7SK	ENSMUSG00000088367	4	70073652	70073957
Megf9	ENSMUSG00000039270	4	70088099	70196029
Gm11227	ENSMUSG00000083549	4	70733707	70734177
Gm11228	ENSMUSG00000084937	4	70736143	70792167
Gm11229	ENSMUSG00000082017	4	70946976	70947412
Rps18-ps1	ENSMUSG00000083914	4	71031729	71032239
Gm11232	ENSMUSG00000066141	4	71416677	71418999
Tle1	ENSMUSG00000008305	4	71778176	71861953
Gm11231	ENSMUSG00000082432	4	71339047	71340752
Gm11233	ENSMUSG00000081117	4	71529022	71530011
Gm11234	ENSMUSG00000086696	4	71641511	71660593
Gm11250	ENSMUSG00000086027	4	71829802	71830483
C630043F03Rik	ENSMUSG00000084910	4	71862382	71876386
Gm11235	ENSMUSG00000083372	4	72203700	72204032
Nfib	ENSMUSG00000008575	4	81936077	82351654
Zdhhc21	ENSMUSG00000028403	4	82444642	82505862
Cer1	ENSMUSG00000038192	4	82527655	82531052
Frem1	ENSMUSG00000059049	4	82543825	82698243
Ttc39b	ENSMUSG00000038172	4	82866204	82970159
Snapc3	ENSMUSG00000028483	4	83063628	83113580
Psip1	ENSMUSG00000028484	4	83101584	83132363
Gm10154	ENSMUSG00000066116	4	83151051	83151458
4930473A06Rik	ENSMUSG00000052407	4	83171449	83510635
Gm11411	ENSMUSG00000083385	4	81342345	81343063
Gm11412	ENSMUSG00000087540	4	81389050	81392605
Gm12914	ENSMUSG00000087608	4	81576382	81578278
Gm11264	ENSMUSG00000087110	4	81679216	81711794
Gm5860	ENSMUSG00000085022	4	81711335	81748712
Gm11266	ENSMUSG00000087413	4	82153920	82193196
Gm11267	ENSMUSG00000084851	4	82230952	82233223
Gm11268	ENSMUSG00000084357	4	82288304	82288570
Gm11269	ENSMUSG00000086293	4	82338709	82339615
Gm11248	ENSMUSG00000082637	4	82767386	82767666
Gm11185	ENSMUSG00000083245	4	82839892	82840898
Gm11413	ENSMUSG00000086321	4	83024221	83036572
Gm11184	ENSMUSG00000087592	4	83028968	83038109
Gm11414	ENSMUSG00000082416	4	83146403	83146665
U6	ENSMUSG00000064951	4	82931708	82931814
n-R5s187	ENSMUSG00000084718	4	81564417	81564527
U4	ENSMUSG00000064606	4	83173532	83173672
n-R5s188	ENSMUSG00000084595	4	82085314	82085418
SNORA17	ENSMUSG00000089409	4	82724415	82724533
AL591611.1	ENSMUSG00000092661	4	81707016	81707125
Cbx3-ps3	ENSMUSG00000080793	4	83346988	83347940
Gm11415	ENSMUSG00000085378	4	83530642	83534762
6030471H07Rik	ENSMUSG00000085217	4	83687943	83690783
Gm12416	ENSMUSG00000083044	4	83750799	83751806
Gm12414	ENSMUSG00000087378	4	83772254	83776193
Bnc2	ENSMUSG00000028487	4	83918446	84321179
Gm12421	ENSMUSG00000083743	4	84074722	84075028
Gm12420	ENSMUSG00000081775	4	84343767	84344814
Gm12415	ENSMUSG00000086413	4	84387379	84388195
U7	ENSMUSG00000088738	4	84476091	84476153
Cntln	ENSMUSG00000038070	4	84530213	84777825
Gm12418	ENSMUSG00000083139	4	84561800	84562741
Gm12419	ENSMUSG00000080303	4	84569458	84570093
Sh3gl2	ENSMUSG00000028488	4	84851030	85285099
Gm12417	ENSMUSG00000084267	4	84822431	84822833
Gm12413	ENSMUSG00000081862	4	84891355	84891666
Gm12680	ENSMUSG00000087349	4	85160231	85429031
7SK	ENSMUSG00000088122	4	85555815	85556092
Adamtsl1	ENSMUSG00000066113	4	85699819	86074289
U6	ENSMUSG00000064687	4	85689298	85689398
Fam154a	ENSMUSG00000028492	4	86090545	86204232
Gm12550	ENSMUSG00000083272	4	86087917	86088245
BC057079	ENSMUSG00000038368	4	87740533	88056915
Ptplad2	ENSMUSG00000028497	4	88042048	88084832
Ifnb1	ENSMUSG00000048806	4	88167929	88168698
Gm12597	ENSMUSG00000073812	4	88203577	88204149
Ifna14	ENSMUSG00000089770	4	88217133	88217702
Ifna9	ENSMUSG00000078644	4	88237717	88238289
Ifna12	ENSMUSG00000073811	4	88248484	88249280
C87499	ENSMUSG00000038330	4	88273224	88280315
Ifna13	ENSMUSG00000063376	4	88289545	88290363
Gm13280	ENSMUSG00000078355	4	88321819	88322828
Ifna2	ENSMUSG00000078354	4	88328785	88329816
Ifnab	ENSMUSG00000078353	4	88336503	88337172
Klhl9	ENSMUSG00000070923	4	88364196	88368369
Gm13271	ENSMUSG00000079860	4	88400772	88401320
Gm16686	ENSMUSG00000085473	4	88401099	88401494
Gm13283	ENSMUSG00000078642	4	88405933	88417772
Gm13290	ENSMUSG00000091634	4	88419152	88420707
Gm13289	ENSMUSG00000090575	4	88422080	88423635
Gm13272	ENSMUSG00000092000	4	88425008	88426563
Ifnz	ENSMUSG00000073810	4	88428035	88429496
Gm13276	ENSMUSG00000091108	4	88430867	88432422
Gm13277	ENSMUSG00000090757	4	88433791	88435346
Gm13278	ENSMUSG00000090392	4	88436709	88438264
Gm13275	ENSMUSG00000079859	4	88440391	88440939
Gm13279	ENSMUSG00000091566	4	88442556	88444111
Gm13285	ENSMUSG00000091353	4	88445479	88447034
Gm13287	ENSMUSG00000061396	4	88448998	88449965
Gm13288	ENSMUSG00000070908	4	88451435	88454284
Ifna7	ENSMUSG00000070907	4	88462129	88462704
Ifna11	ENSMUSG00000070906	4	88465823	88466469
Ifna6	ENSMUSG00000078641	4	88473320	88473889
Ifna5	ENSMUSG00000076440	4	88481429	88481998
Ifna4	ENSMUSG00000070904	4	88487720	88488363
Ifna1	ENSMUSG00000070903	4	88495991	88496560
4930553M12Rik	ENSMUSG00000054351	4	88513786	88514283
Ifne	ENSMUSG00000045364	4	88525442	88526105
Mtap	ENSMUSG00000062937	4	88783026	88826985
Cdkn2a	ENSMUSG00000044303	4	88920377	88940557
Cdkn2b	ENSMUSG00000073802	4	88952198	88956941
Dmrta1	ENSMUSG00000043753	4	89346127	89361463
Zfp352	ENSMUSG00000070902	4	89885511	89892393
Ifna-ps1	ENSMUSG00000080964	4	88224791	88226478
Mrpl48-ps	ENSMUSG00000078480	4	88245079	88245714
Gm12601	ENSMUSG00000083958	4	88258557	88259948
Gm13281	ENSMUSG00000081784	4	88294642	88295208
Gm13273	ENSMUSG00000081893	4	88342095	88342602
Gm13282	ENSMUSG00000084192	4	88353813	88354357
Gm13274	ENSMUSG00000086074	4	88384742	88390198
Gm13286	ENSMUSG00000081501	4	88403748	88404284
Gm10583	ENSMUSG00000073809	4	88404075	88404474
Gm10582	ENSMUSG00000073808	4	88407005	88407404
Gm13284	ENSMUSG00000082789	4	88409613	88417510
Gm10581	ENSMUSG00000073807	4	88417454	88417688
Gm10580	ENSMUSG00000073806	4	88420225	88420624
Gm12603	ENSMUSG00000085183	4	88696212	88730518
Gm12602	ENSMUSG00000085569	4	88746568	88774130
Gm12607	ENSMUSG00000083989	4	88807603	88808095
Gm12605	ENSMUSG00000083881	4	88862768	88863720
Gm12606	ENSMUSG00000087659	4	88881603	88919307
Gm12609	ENSMUSG00000085147	4	89048648	89066571
Gm12610	ENSMUSG00000086035	4	89088539	89130178
Gm12608	ENSMUSG00000080808	4	89108908	89111335
Gm12629	ENSMUSG00000085690	4	89852218	89856700
Gm17476	ENSMUSG00000090834	4	88430359	88440295
Gm17612	ENSMUSG00000091535	4	88442047	88446128
Mir31	ENSMUSG00000065408	4	88556461	88556566
SNORA17	ENSMUSG00000088504	4	88828885	88829024
Gm12633	ENSMUSG00000080756	4	90026313	90028017
Gm12634	ENSMUSG00000082569	4	90035422	90036413
Elavl2	ENSMUSG00000008489	4	90917454	91067476
Gm12635	ENSMUSG00000081563	4	90119565	90120316
Gm12636	ENSMUSG00000082502	4	90210438	90211061
Gm12632	ENSMUSG00000082622	4	90523574	90524068
Gm12643	ENSMUSG00000079962	4	90704591	90704964
Gm12644	ENSMUSG00000081876	4	90823373	90823978
Gm12653	ENSMUSG00000083377	4	91032070	91032630
Gm12668	ENSMUSG00000085817	4	91293280	91296830
Gm12670	ENSMUSG00000086042	4	91313006	91317843
Gm12667	ENSMUSG00000082523	4	91375329	91376660
SNORA17	ENSMUSG00000077589	4	90664553	90664684
Gm12669	ENSMUSG00000049494	4	91472238	91473247
Gm12671	ENSMUSG00000080830	4	91518179	91519431
4930577H14Rik	ENSMUSG00000087517	4	91605545	91606643
Izumo3	ENSMUSG00000028533	4	91811020	91813925
Gm12666	ENSMUSG00000066107	4	91857435	91858440
Gm12638	ENSMUSG00000083296	4	92039742	92040039
Gm12637	ENSMUSG00000085209	4	92195242	92214995
Gm12639	ENSMUSG00000081987	4	92636935	92637427
Gm12641	ENSMUSG00000082919	4	92773679	92776605
U6	ENSMUSG00000088914	4	92533166	92533273
Tusc1	ENSMUSG00000054000	4	93000839	93002202
Gm12642	ENSMUSG00000082325	4	92932104	92932979
Gm12649	ENSMUSG00000084833	4	93119949	93337761
Gm12640	ENSMUSG00000083607	4	93265877	93266186
U6	ENSMUSG00000077195	4	93267670	93267776
SNORA61	ENSMUSG00000064850	4	93211841	93211968
Gm12650	ENSMUSG00000073797	4	93469024	93469281
AL833773.1	ENSMUSG00000077037	4	93405427	93405536
Gm12651	ENSMUSG00000083724	4	93570715	93571161
Gm12647	ENSMUSG00000081685	4	93728064	93728328
Gm12648	ENSMUSG00000085931	4	93756267	94092279
SNORA61	ENSMUSG00000077622	4	93764981	93765109
5830433M19Rik	ENSMUSG00000028578	4	94166772	94223487
Gm10306	ENSMUSG00000070900	4	94223237	94223769
Gm12654	ENSMUSG00000081508	4	94062349	94062935
Gm12655	ENSMUSG00000087128	4	94127622	94143871
Gm12656	ENSMUSG00000083359	4	94163723	94164299
SNORA2	ENSMUSG00000088677	4	94154574	94154674
7SK	ENSMUSG00000088295	4	94100915	94101175
Plaa	ENSMUSG00000028577	4	94234205	94269935
Ift74	ENSMUSG00000028576	4	94281182	94359920
Lrrc19	ENSMUSG00000049799	4	94303344	94316835
Gm17636	ENSMUSG00000091804	4	94318600	94323162
Gm12657	ENSMUSG00000063314	4	94260341	94267001
Mir872	ENSMUSG00000077921	4	94331848	94331928
Tek	ENSMUSG00000006386	4	94405980	94541667
4930579C15Rik	ENSMUSG00000028575	4	94573958	94595534
Mysm1	ENSMUSG00000062627	4	94608731	94645791
Jun	ENSMUSG00000052684	4	94715725	94718913
Fggy	ENSMUSG00000028573	4	95224198	95593630
Hook1	ENSMUSG00000028572	4	95633931	95692104
Cyp2j13	ENSMUSG00000028571	4	95694225	95744237
Cyp2j12	ENSMUSG00000081225	4	95766009	95807843
Cyp2j7-ps	ENSMUSG00000081362	4	95861888	95903350
Cyp2j11	ENSMUSG00000066097	4	95961199	96015353
Cyp2j8	ENSMUSG00000082932	4	96111287	96174077
Cyp2j6	ENSMUSG00000052914	4	96182829	96220352
Cyp2j9	ENSMUSG00000015224	4	96235120	96258269
Cyp2j5	ENSMUSG00000052520	4	96295464	96330845
Gm12695	ENSMUSG00000078639	4	96390338	96451877
Gm12693	ENSMUSG00000083179	4	94602312	94602794
Gm12694	ENSMUSG00000086251	4	94645894	94695235
Gm12703	ENSMUSG00000052767	4	94696654	94715061
Gm12704	ENSMUSG00000081030	4	94705853	94706316
BC042782	ENSMUSG00000087366	4	94718225	94834009
4930551L18Rik	ENSMUSG00000085377	4	94755774	94758110
Gm12708	ENSMUSG00000084918	4	94860004	94876418
Gm830	ENSMUSG00000084939	4	95131415	95154085
Gm12707	ENSMUSG00000085835	4	95150647	95154092
RP23-356F8.3	ENSMUSG00000093492	4	95228522	95228850
9530080O11Rik	ENSMUSG00000044125	4	95626406	95634346
Hspe1-ps6	ENSMUSG00000083880	4	95739115	95739397
Gm12674	ENSMUSG00000080884	4	95818344	95818549
Gm12673	ENSMUSG00000083801	4	95836898	95837076
Gm12675	ENSMUSG00000082681	4	95856762	95856934
Gm12658	ENSMUSG00000084286	4	95912251	95940961
Gm12659	ENSMUSG00000082119	4	96023002	96046902
n-R5s189	ENSMUSG00000084624	4	94729341	94729454
U1	ENSMUSG00000065745	4	95190735	95190895
Gm10192	ENSMUSG00000066990	4	96849531	96849857
E130114P18Rik	ENSMUSG00000048747	4	97234824	97444769
Gm12696	ENSMUSG00000084159	4	97188119	97189023
Gm12697	ENSMUSG00000082683	4	97223095	97223761
Nfia	ENSMUSG00000028565	4	97439425	97868605
Gm12676	ENSMUSG00000085710	4	97420859	97424080
Gm12691	ENSMUSG00000081096	4	97812835	97813290
Gm12692	ENSMUSG00000082388	4	97901436	97901981
Gm12787	ENSMUSG00000083644	4	97934774	97935266
Y_RNA	ENSMUSG00000064883	4	97942416	97942529
Nrd1	ENSMUSG00000053510	4	108673260	108734382
Osbpl9	ENSMUSG00000028559	4	108733750	108874877
Calr4	ENSMUSG00000028558	4	108907090	108927176
Eps15	ENSMUSG00000028552	4	108952873	109060422
Ttc39a	ENSMUSG00000028555	4	109079228	109117350
Rnf11	ENSMUSG00000028557	4	109123703	109157333
4930522H14Rik	ENSMUSG00000060491	4	109177942	109203902
Cdkn2c	ENSMUSG00000028551	4	109333481	109339794
Faf1	ENSMUSG00000010517	4	109349193	109636565
Dmrta2	ENSMUSG00000047143	4	109650658	109656292
Elavl4	ENSMUSG00000028546	4	109876327	110024514
Agbl4	ENSMUSG00000061298	4	110070266	111336929
Gm12749	ENSMUSG00000083512	4	109046306	109047464
Gm12750	ENSMUSG00000085873	4	109076399	109078760
Gm12811	ENSMUSG00000087641	4	109241819	109329396
Gm12803	ENSMUSG00000082771	4	109302187	109303330
9630013D21Rik	ENSMUSG00000059027	4	109324134	109330458
Gm12808	ENSMUSG00000083995	4	109427019	109427422
3010003L10Rik	ENSMUSG00000085256	4	109649343	109650418
Gm12806	ENSMUSG00000081813	4	110182640	110182907
Gm12807	ENSMUSG00000082348	4	110185376	110186337
AL669940.1	ENSMUSG00000093374	4	110112295	110112375
SNORA17	ENSMUSG00000077687	4	109209644	109209774
7SK	ENSMUSG00000088014	4	108833529	108833802
Bend5	ENSMUSG00000028545	4	111087611	111132903
Spata6	ENSMUSG00000034401	4	111392589	111501789
Slc5a9	ENSMUSG00000028544	4	111547980	111575523
Skint8	ENSMUSG00000078599	4	111591997	111622963
Skint7	ENSMUSG00000049214	4	111592160	111660828
Skint1	ENSMUSG00000089773	4	111678874	111702143
Skint4	ENSMUSG00000055960	4	111744621	111840681
Skint3	ENSMUSG00000070868	4	111904850	111973073
Skint9	ENSMUSG00000049972	4	112058574	112106590
Gm12804	ENSMUSG00000081068	4	110962723	110963721
Gm12805	ENSMUSG00000083904	4	110992163	110993210
Gm12961	ENSMUSG00000082686	4	111463226	111464275
Gm12960	ENSMUSG00000060887	4	111479963	111481031
Gm12820	ENSMUSG00000084326	4	111793608	111793949
Gm12815	ENSMUSG00000082638	4	111818703	111818837
n-R5s191	ENSMUSG00000084673	4	111100423	111100538
7SK	ENSMUSG00000084536	4	111661255	111661563
Skint5	ENSMUSG00000078598	4	113150496	113672108
Skint11	ENSMUSG00000057977	4	113835989	113917633
Gm12824	ENSMUSG00000070867	4	114079329	114287703
Gm12830	ENSMUSG00000055198	4	114494327	114528771
Foxd2	ENSMUSG00000055210	4	114578885	114581503
Foxe3	ENSMUSG00000044518	4	114597681	114598657
Cmpk1	ENSMUSG00000028719	4	114631941	114659846
Stil	ENSMUSG00000028718	4	114672723	114715801
Tal1	ENSMUSG00000028717	4	114729031	114744360
Pdzk1ip1	ENSMUSG00000028716	4	114761313	114766504
Cyp4x1	ENSMUSG00000047155	4	114778928	114806886
Cyp4a12a	ENSMUSG00000066071	4	114971651	115005420
Gm12813	ENSMUSG00000083384	4	113040792	113066964
Gm12812	ENSMUSG00000082559	4	113321792	113322224
Gm17095	ENSMUSG00000091770	4	113672454	113673054
Gm12825	ENSMUSG00000080696	4	113768995	113770006
Gm15741	ENSMUSG00000082825	4	113837728	113838481
Gm12829	ENSMUSG00000085870	4	114353409	114360200
9130410C08Rik	ENSMUSG00000085323	4	114489766	114575464
9130206I24Rik	ENSMUSG00000085399	4	114581862	114594572
Gm12835	ENSMUSG00000086896	4	114806437	114810469
Cyp4a28-ps	ENSMUSG00000081823	4	114811173	114829111
Gm12831	ENSMUSG00000082889	4	114848403	114849448
Gm12834	ENSMUSG00000081138	4	114911359	114914187
Cyp4a29-ps	ENSMUSG00000083138	4	114914689	114927162
Gm12836	ENSMUSG00000083190	4	115016393	115035720
U1	ENSMUSG00000087923	4	114517590	114517722
Y_RNA	ENSMUSG00000065047	4	114660569	114660666
Cyp4a12b	ENSMUSG00000078597	4	115084229	115111639
Cyp4a14	ENSMUSG00000028715	4	115158805	115168747
Cyp4a10	ENSMUSG00000066072	4	115190869	115206254
Cyp4a31	ENSMUSG00000028712	4	115236254	115251618
Cyp4a32	ENSMUSG00000063929	4	115273574	115294207
Cyp4b1	ENSMUSG00000028713	4	115297303	115320322
4732418C07Rik	ENSMUSG00000034210	4	115410349	115449932
4930544O15Rik	ENSMUSG00000044556	4	115452439	115453623
Atpaf1	ENSMUSG00000028710	4	115457417	115491433
Mob3c	ENSMUSG00000028709	4	115500697	115508790
Mknk1	ENSMUSG00000028708	4	115511803	115551855
Kncn	ENSMUSG00000073774	4	115557005	115562131
Dmbx1	ENSMUSG00000028707	4	115587149	115612531
Gm12837	ENSMUSG00000084415	4	115088687	115089059
Cyp4a30b-ps	ENSMUSG00000084346	4	115125209	115143666
Gm12838	ENSMUSG00000080142	4	115126397	115126721
Gm12833	ENSMUSG00000086724	4	115153405	115153881
Gm12832	ENSMUSG00000081006	4	115215990	115217669
Gm12839	ENSMUSG00000083457	4	115254891	115255749
Gm12848	ENSMUSG00000082043	4	115324994	115326085
Gm12849	ENSMUSG00000081172	4	115379856	115380908
Gm12847	ENSMUSG00000085249	4	115491462	115495260
6430628N08Rik	ENSMUSG00000034185	4	115563271	115571833
AL627182.1	ENSMUSG00000093220	4	115193323	115193575
Faah	ENSMUSG00000034171	4	115639750	115690531
Nsun4	ENSMUSG00000028706	4	115704379	115726481
Nsun4	ENSMUSG00000090697	4	115706512	115725985
Uqcrh	ENSMUSG00000063882	4	115739570	115747676
Gm12854	ENSMUSG00000078238	4	115739858	115740169
Lrrc41	ENSMUSG00000028703	4	115747874	115769648
Rad54l	ENSMUSG00000028702	4	115766869	115796295
Pomgnt1	ENSMUSG00000028700	4	115796445	115832454
1520402A15Rik	ENSMUSG00000028701	4	115805011	115823943
Tspan1	ENSMUSG00000028699	4	115834474	115840206
1700042G07Rik	ENSMUSG00000078593	4	115845977	115846895
Gm12951	ENSMUSG00000085920	4	115848851	115850337
Pik3r3	ENSMUSG00000028698	4	115894223	115975661
Gm12952	ENSMUSG00000081459	4	115873168	115873557
Mast2	ENSMUSG00000003810	4	115979367	116136788
Gpbp1l1	ENSMUSG00000034042	4	116230263	116266505
Ccdc17	ENSMUSG00000034035	4	116269259	116272871
Nasp	ENSMUSG00000028693	4	116273657	116300556
Akr1a1	ENSMUSG00000028692	4	116309115	116324285
Prdx1	ENSMUSG00000028691	4	116358149	116373427
Mmachc	ENSMUSG00000028690	4	116374884	116381011
Ccdc163	ENSMUSG00000028689	4	116381114	116423811
Tesk2	ENSMUSG00000033985	4	116393553	116478561
Toe1	ENSMUSG00000028688	4	116466915	116480245
Mutyh	ENSMUSG00000028687	4	116480328	116492045
Hpdl	ENSMUSG00000043155	4	116492512	116494113
Zswim5	ENSMUSG00000033948	4	116549981	116661869
Urod	ENSMUSG00000028684	4	116662570	116667018
Hectd3	ENSMUSG00000046861	4	116667922	116677882
Eif2b3	ENSMUSG00000028683	4	116692007	116759911
Ptch2	ENSMUSG00000028681	4	116768680	116788706
Btbd19	ENSMUSG00000073771	4	116791824	116798271
Tctex1d4	ENSMUSG00000047671	4	116799399	116801343
Plk3	ENSMUSG00000028680	4	116801260	116806568
Rps8	ENSMUSG00000047675	4	116826432	116828848
Kif2c	ENSMUSG00000028678	4	116832244	116855244
Gm1661	ENSMUSG00000060268	4	116885938	116924730
Tmem53	ENSMUSG00000048772	4	116924556	116941187
Rnf220	ENSMUSG00000028677	4	116944068	117169657
Eri3	ENSMUSG00000033423	4	117222970	117346902
Dmap1	ENSMUSG00000009640	4	117347286	117354878
Klf17	ENSMUSG00000048626	4	117430441	117438253
Slc6a9	ENSMUSG00000028542	4	117507111	117547803
Ccdc24	ENSMUSG00000078588	4	117539129	117545162
B4galt2	ENSMUSG00000028541	4	117541865	117556092
Atp6v0b	ENSMUSG00000033379	4	117556931	117559938
Dph2	ENSMUSG00000028540	4	117561248	117564637
Ipo13	ENSMUSG00000033365	4	117567091	117587604
Artn	ENSMUSG00000028539	4	117598767	117602368
St3gal3	ENSMUSG00000028538	4	117604759	117807519
Kdm4a	ENSMUSG00000033326	4	117809562	117852648
Ptprf	ENSMUSG00000033295	4	117880818	117964010
Hyi	ENSMUSG00000006395	4	118032595	118035349
Szt2	ENSMUSG00000033253	4	118035348	118081878
Med8	ENSMUSG00000006392	4	118081942	118088387
Elovl1	ENSMUSG00000006390	4	118100698	118105558
Cdc20	ENSMUSG00000006398	4	118105506	118109957
Mpl	ENSMUSG00000006389	4	118115020	118130118
Tie1	ENSMUSG00000033191	4	118143796	118162666
2610528J11Rik	ENSMUSG00000028536	4	118199604	118202833
Tmem125	ENSMUSG00000050854	4	118213546	118216649
Wdr65	ENSMUSG00000028730	4	118227156	118293382
C530005A16Rik	ENSMUSG00000085408	4	116262338	116270235
Gm12996	ENSMUSG00000086417	4	116497508	116503208
Rpl36-ps8	ENSMUSG00000075390	4	116512512	116512826
Gm12994	ENSMUSG00000082841	4	116525269	116525715
Gm12993	ENSMUSG00000082063	4	116547193	116548070
Gm12998	ENSMUSG00000082207	4	116618337	116619139
1700021J08Rik	ENSMUSG00000086890	4	116674771	116675617
Gm12997	ENSMUSG00000082249	4	116687732	116688371
Gm13014	ENSMUSG00000084943	4	116796582	116797771
Best4-ps	ENSMUSG00000033872	4	116817862	116821242
Gm13015	ENSMUSG00000070834	4	116821528	116821731
1700012C08Rik	ENSMUSG00000086482	4	116885939	116886387
Gm12843	ENSMUSG00000085749	4	116968422	116970330
Gm12828	ENSMUSG00000086876	4	117118555	117127645
Gm12827	ENSMUSG00000087228	4	117169057	117173207
Gm12826	ENSMUSG00000083446	4	117186428	117186806
Gm12840	ENSMUSG00000086320	4	117372793	117373528
Gm12845	ENSMUSG00000085674	4	117398504	117399434
Gm12844	ENSMUSG00000084260	4	117401323	117401904
Gm12842	ENSMUSG00000083507	4	117497786	117498261
Gm17114	ENSMUSG00000091237	4	117507904	117541163
Gm20520	ENSMUSG00000091331	4	117540261	117541578
Gm12841	ENSMUSG00000085278	4	117556226	117558600
9530034E10Rik	ENSMUSG00000086554	4	117647641	117666577
Gm12858	ENSMUSG00000081921	4	118113618	118113825
Gm12859	ENSMUSG00000080857	4	118163387	118170247
Gm12857	ENSMUSG00000081233	4	118194623	118195214
U5	ENSMUSG00000070237	4	116883449	116883564
SNORD38	ENSMUSG00000064542	4	116826698	116826767
AL671866.1	ENSMUSG00000092682	4	116830914	116831038
Snord38a	ENSMUSG00000065680	4	116827119	116827189
SNORD46	ENSMUSG00000064751	4	116827791	116827894
U6	ENSMUSG00000088349	4	116699816	116699914
U6	ENSMUSG00000065154	4	116594989	116595095
Snord55	ENSMUSG00000092680	4	116828375	116828453
U6	ENSMUSG00000088845	4	116577242	116577346
AL671520.1	ENSMUSG00000087807	4	117242739	117242812
U6	ENSMUSG00000065185	4	116346758	116346867
AL683847.1	ENSMUSG00000092707	4	116406203	116406437
U5	ENSMUSG00000064430	4	116862547	116862662
7SK	ENSMUSG00000088902	4	116587832	116588098
SNORA70	ENSMUSG00000088303	4	117836683	117836786
U5	ENSMUSG00000070228	4	116875133	116875248
Ebna1bp2	ENSMUSG00000028729	4	118293404	118300381
Gm12853	ENSMUSG00000085292	4	118305452	118308667
Olfr62	ENSMUSG00000043698	4	118338124	118339072
Olfr1342	ENSMUSG00000043383	4	118362067	118363068
Olfr1341	ENSMUSG00000046790	4	118381015	118382952
Olfr1340	ENSMUSG00000070821	4	118398854	118399804
Olfr1339	ENSMUSG00000070820	4	118407136	118408083
Olfr1338	ENSMUSG00000066063	4	118426200	118427141
Olfr1337	ENSMUSG00000061075	4	118454241	118455188
Olfr1335	ENSMUSG00000066061	4	118481402	118482549
Olfr1333	ENSMUSG00000073770	4	118502090	118508878
Olfr1331	ENSMUSG00000073769	4	118537263	118542341
Olfr1330	ENSMUSG00000073768	4	118565690	118566637
Olfr1329	ENSMUSG00000073767	4	118589129	118590070
Olfr1328	ENSMUSG00000073766	4	118606504	118607445
Lao1	ENSMUSG00000024903	4	118634183	118641517
Slc2a1	ENSMUSG00000028645	4	118781316	118809935
Zfp691	ENSMUSG00000045268	4	118842118	118846800
Ermap	ENSMUSG00000028644	4	118848062	118862616
Ccdc23	ENSMUSG00000028643	4	118867911	118873903
AU022252	ENSMUSG00000078584	4	118876175	118905317
4930538K18Rik	ENSMUSG00000028642	4	118877712	118890822
Lepre1	ENSMUSG00000028641	4	118905520	118921580
Cldn19	ENSMUSG00000066058	4	118928019	118935043
Ybx1	ENSMUSG00000028639	4	118950586	118967209
Ppih	ENSMUSG00000060288	4	118972615	118993151
Ccdc30	ENSMUSG00000028637	4	118995498	119088126
Ppcs	ENSMUSG00000028636	4	119091135	119095025
Zmynd12	ENSMUSG00000070806	4	119095419	119140049
Rimkla	ENSMUSG00000048899	4	119137888	119165233
Olfr1343-ps1	ENSMUSG00000086521	4	118345214	118346127
Gm12855	ENSMUSG00000081474	4	118463686	118464198
Olfr1332-ps1	ENSMUSG00000083336	4	118526697	118527650
Gm12856	ENSMUSG00000084133	4	118614665	118615957
Gm12863	ENSMUSG00000073765	4	118626879	118627524
Gm12861	ENSMUSG00000085895	4	118643902	118672063
Gm12865	ENSMUSG00000087238	4	118656663	118669803
Gm12864	ENSMUSG00000082143	4	118659619	118660624
Gm12862	ENSMUSG00000087464	4	118672265	118673090
Gm12866	ENSMUSG00000066060	4	118727395	118741716
Gm12867	ENSMUSG00000086683	4	118802897	118803606
Gm12868	ENSMUSG00000085505	4	118806354	118811406
Gm12898	ENSMUSG00000085626	4	118895779	118897420
Gm12927	ENSMUSG00000085203	4	118925127	118929580
Ldha-ps2	ENSMUSG00000083836	4	119006994	119008050
SNORA17	ENSMUSG00000089591	4	118652923	118653047
BX470216.1	ENSMUSG00000092987	4	119078639	119078845
Mir1957	ENSMUSG00000088552	4	118802384	118802449
9530002B09Rik	ENSMUSG00000023263	4	122366518	122382372
Ppt1	ENSMUSG00000028657	4	122513485	122536418
Cap1	ENSMUSG00000028656	4	122536290	122563299
Mfsd2a	ENSMUSG00000028655	4	122624093	122638431
Mycl1	ENSMUSG00000028654	4	122672895	122679728
Trit1	ENSMUSG00000028653	4	122693840	122732192
Bmp8b	ENSMUSG00000002384	4	122782408	122809342
Gm17244	ENSMUSG00000091865	4	122792642	122793929
Oxct2b	ENSMUSG00000076438	4	122793507	122795192
Ppie	ENSMUSG00000028651	4	122804358	122817194
Hpcal4	ENSMUSG00000046093	4	122860470	122871944
Nt5c1a	ENSMUSG00000054958	4	122878747	122893518
Heyl	ENSMUSG00000032744	4	122910799	122927118
Pabpc4	ENSMUSG00000011257	4	122939594	122976168
Bmp8a	ENSMUSG00000032726	4	122989888	123020495
Oxct2a	ENSMUSG00000076436	4	122999118	123000877
Macf1	ENSMUSG00000028649	4	123026876	123361603
Ndufs5	ENSMUSG00000028648	4	123389953	123395445
Akirin1	ENSMUSG00000023075	4	123411802	123427588
Rhbdl2	ENSMUSG00000043333	4	123465117	123507147
Gm12897	ENSMUSG00000083949	4	121542784	121561691
Gm12893	ENSMUSG00000083867	4	121590014	121590952
Gm12892	ENSMUSG00000083679	4	121756168	121757313
Gm12896	ENSMUSG00000083558	4	121870822	121871047
Gm12894	ENSMUSG00000084406	4	121982891	121983831
Gm12895	ENSMUSG00000083365	4	122132453	122132678
Gm12877	ENSMUSG00000081377	4	122259943	122282137
Gm12874	ENSMUSG00000084196	4	122270227	122271311
Gm12875	ENSMUSG00000080871	4	122317589	122325569
Gm12876	ENSMUSG00000083109	4	122338166	122354521
Gm12872	ENSMUSG00000084082	4	122407527	122411976
Gm12873	ENSMUSG00000083494	4	122455397	122470992
Gm12891	ENSMUSG00000080929	4	122603076	122603315
4933421A08Rik	ENSMUSG00000086443	4	122638552	122640718
Gm12923	ENSMUSG00000086153	4	122770008	122771271
Gm12901	ENSMUSG00000083720	4	122935289	122936147
Gm12900	ENSMUSG00000082634	4	122952143	122952715
Gm12924	ENSMUSG00000081528	4	123112860	123113177
Gm12926	ENSMUSG00000081585	4	123307538	123307946
Gm12925	ENSMUSG00000087307	4	123343124	123348460
Gm12922	ENSMUSG00000081170	4	123386462	123387270
1700121C08Rik	ENSMUSG00000086275	4	123510865	123536756
Gm12904	ENSMUSG00000082310	4	123515347	123516745
SNORA55	ENSMUSG00000065778	4	122970395	122970525
SNORA55	ENSMUSG00000064655	4	122968587	122968717
7SK	ENSMUSG00000089588	4	123167474	123167579
AL713967.1	ENSMUSG00000078065	4	122330722	122330811
4933427I04Rik	ENSMUSG00000073761	4	123536922	123540408
Mycbp	ENSMUSG00000028647	4	123582075	123589512
Rragc	ENSMUSG00000028646	4	123594689	123614240
D130007C19Rik	ENSMUSG00000054304	4	123579372	123580877
Gm12903	ENSMUSG00000080993	4	123579665	123580208
Gm12905	ENSMUSG00000085875	4	123582305	123594512
Gm17408	ENSMUSG00000091927	4	123575876	123582085
Gm12902	ENSMUSG00000082515	4	123603477	123603798
3100002H09Rik	ENSMUSG00000051219	4	124287174	124288046
Pou3f1	ENSMUSG00000078236	4	124334050	124337899
Utp11l	ENSMUSG00000028907	4	124355404	124370844
Fhl3	ENSMUSG00000032643	4	124377945	124385855
Sf3a3	ENSMUSG00000028902	4	124392020	124409704
Inpp5b	ENSMUSG00000028894	4	124419094	124478755
Mtf1	ENSMUSG00000028890	4	124479348	124527044
1110065P20Rik	ENSMUSG00000078570	4	124526729	124527974
Yrdc	ENSMUSG00000028889	4	124527923	124532486
Maneal	ENSMUSG00000042763	4	124532483	124539415
Epha10	ENSMUSG00000028876	4	124558143	124595044
Cdca8	ENSMUSG00000028873	4	124595709	124616555
Rspo1	ENSMUSG00000028871	4	124663674	124686343
Gnl2	ENSMUSG00000028869	4	124693829	124732624
Dnali1	ENSMUSG00000042707	4	124732582	124742947
Snip1	ENSMUSG00000050213	4	124743916	124751286
Meaf6	ENSMUSG00000028863	4	124762378	124790482
Zc3h12a	ENSMUSG00000042677	4	124795667	124805084
Gm12916	ENSMUSG00000086087	4	123970936	123977091
1700021L23Rik	ENSMUSG00000086955	4	123980080	123988704
4933435F18Rik	ENSMUSG00000086978	4	124003551	124009751
1700057H15Rik	ENSMUSG00000084757	4	124091659	124163202
4933407E24Rik	ENSMUSG00000073759	4	124246433	124251888
Pou3f1	ENSMUSG00000090125	4	124334889	124337899
Gm12917	ENSMUSG00000083104	4	124396243	124396881
Gm12915	ENSMUSG00000086589	4	124412974	124428598
1700125G02Rik	ENSMUSG00000085263	4	124568132	124572026
9930104L06Rik	ENSMUSG00000044730	4	124614292	124621900
Gm12930	ENSMUSG00000087011	4	124634891	124664253
Gm12931	ENSMUSG00000080934	4	124696744	124697067
Gm12932	ENSMUSG00000086342	4	124760101	124762191
1700041M05Rik	ENSMUSG00000087010	4	124905841	124919296
AL626775.1	ENSMUSG00000078049	4	124783500	124783581
AL606907.1	ENSMUSG00000077026	4	124413083	124413192
Mir697	ENSMUSG00000076271	4	124408938	124409046
n-R5s192	ENSMUSG00000084526	4	124498065	124498183
Mir698	ENSMUSG00000076119	4	124421025	124421133
U6	ENSMUSG00000088067	4	124374749	124374851
U6	ENSMUSG00000088933	4	124012821	124012924
Grik3	ENSMUSG00000001985	4	125167944	125391417
Ftl2	ENSMUSG00000082062	4	125181532	125182083
Mir692-2a	ENSMUSG00000076035	4	125181993	125182101
BC003266	ENSMUSG00000042380	4	126921028	126925053
Gja4	ENSMUSG00000050234	4	126988665	126991283
Gjb3	ENSMUSG00000042367	4	127002479	127008088
Gjb4	ENSMUSG00000046623	4	127028330	127031325
Gjb5	ENSMUSG00000042357	4	127032053	127035425
CK137956	ENSMUSG00000028813	4	127604836	127648195
Csmd2	ENSMUSG00000028804	4	127665101	128244903
Hmgb4	ENSMUSG00000048686	4	127937457	127938139
Zscan20	ENSMUSG00000061894	4	128260783	128287342
Tlr12	ENSMUSG00000062545	4	128292690	128295863
Phc2	ENSMUSG00000028796	4	128331982	128430125
A3galt2	ENSMUSG00000028794	4	128432608	128446542
Zfp362	ENSMUSG00000028799	4	128450332	128483289
Trim62	ENSMUSG00000041000	4	128560824	128588572
Adc	ENSMUSG00000028789	4	128607477	128639686
Ak2	ENSMUSG00000028792	4	128669202	128688773
Rnf19b	ENSMUSG00000028793	4	128735515	128763130
Tmem54	ENSMUSG00000028786	4	128782792	128788870
Hpca	ENSMUSG00000028785	4	128788814	128799280
Fndc5	ENSMUSG00000001334	4	128814243	128821837
S100pbp	ENSMUSG00000040928	4	128825249	128866971
Yars	ENSMUSG00000028811	4	128867004	128896851
C77080	ENSMUSG00000050390	4	128896822	128938648
Gm12948	ENSMUSG00000082047	4	126974028	126974709
Gm12947	ENSMUSG00000079998	4	127085623	127086042
4930471C06Rik	ENSMUSG00000086138	4	127152092	127154084
1700080G11Rik	ENSMUSG00000086771	4	127208866	127210129
A630031M04Rik	ENSMUSG00000087470	4	127222345	127247746
1700112K13Rik	ENSMUSG00000087510	4	127487882	127489417
4930465A12Rik	ENSMUSG00000087459	4	127810767	127841503
4930546G22Rik	ENSMUSG00000085717	4	127938288	127940234
Gm12958	ENSMUSG00000084891	4	128314715	128315691
Gm12968	ENSMUSG00000085701	4	128523441	128550942
Gm12969	ENSMUSG00000084011	4	128545637	128546640
Gm15904	ENSMUSG00000085961	4	128613249	128617439
1700086P04Rik	ENSMUSG00000085085	4	128727341	128735227
Gm15906	ENSMUSG00000087416	4	128812335	128814154
snoU13	ENSMUSG00000088921	4	128896701	128896788
U6	ENSMUSG00000087987	4	126961975	126962077
Gm12976	ENSMUSG00000087575	4	128939209	128942254
Sync	ENSMUSG00000001333	4	128964861	128985803
Rbbp4	ENSMUSG00000057236	4	128984344	129012614
Zbtb8os	ENSMUSG00000057572	4	129012939	129031791
Zbtb8a	ENSMUSG00000028807	4	129030872	129055360
Zbtb8b	ENSMUSG00000048485	4	129103009	129118097
Bsdc1	ENSMUSG00000040859	4	129138825	129165742
Tssk3	ENSMUSG00000000411	4	129166258	129168266
1700125D06Rik	ENSMUSG00000078554	4	129168434	129169200
Marcksl1	ENSMUSG00000047945	4	129190825	129193229
Hdac1	ENSMUSG00000028800	4	129193348	129219957
Lck	ENSMUSG00000000409	4	129225588	129250885
Fam167b	ENSMUSG00000050493	4	129254059	129255793
Eif3i	ENSMUSG00000028798	4	129269204	129277892
2510006D16Rik	ENSMUSG00000028797	4	129277912	129301303
Dcdc2b	ENSMUSG00000078552	4	129285773	129291498
Iqcc	ENSMUSG00000040795	4	129292370	129296343
Ccdc28b	ENSMUSG00000028795	4	129296518	129301191
Txlna	ENSMUSG00000053841	4	129303327	129318309
Kpna6	ENSMUSG00000003731	4	129321224	129350011
Tmem39b	ENSMUSG00000053730	4	129353599	129374082
Khdrbs1	ENSMUSG00000028790	4	129380408	129419547
Ptp4a2	ENSMUSG00000028788	4	129488463	129527247
Spocd1	ENSMUSG00000028784	4	129624791	129634359
Bai2	ENSMUSG00000028782	4	129662114	129699877
Col16a1	ENSMUSG00000040690	4	129725084	129776527
Pef1	ENSMUSG00000028779	4	129779802	129805379
Hcrtr1	ENSMUSG00000028778	4	129807461	129816603
Tinagl1	ENSMUSG00000028776	4	129841698	129852366
Gm853	ENSMUSG00000023120	4	129886353	129899645
Serinc2	ENSMUSG00000023232	4	129930739	129956449
Gm10570	ENSMUSG00000073752	4	129985406	129985918
Fabp3	ENSMUSG00000028773	4	129985839	129992707
Zcchc17	ENSMUSG00000028772	4	129992627	130037190
Snrnp40	ENSMUSG00000074088	4	130037379	130067274
Nkain1	ENSMUSG00000078532	4	130125705	130169623
Gm12980	ENSMUSG00000082468	4	129057088	129057423
Gm12979	ENSMUSG00000086336	4	129169213	129186990
Gm12965	ENSMUSG00000086797	4	129300855	129301336
Gm12967	ENSMUSG00000080944	4	129438872	129439160
Gm10571	ENSMUSG00000073753	4	129532315	129533954
Gm12966	ENSMUSG00000070729	4	129576337	129577146
E330017L17Rik	ENSMUSG00000086369	4	129583460	129597031
1700003M07Rik	ENSMUSG00000085389	4	129637618	129640901
Gm12963	ENSMUSG00000085517	4	129701500	129725018
Gm17525	ENSMUSG00000091673	4	128986325	128995687
U1	ENSMUSG00000064613	4	129135595	129135734
U1	ENSMUSG00000065768	4	129572817	129572968
AL607123.1	ENSMUSG00000093163	4	128960109	128960190
Gpatch3	ENSMUSG00000028850	4	133130660	133140158
Gpn2	ENSMUSG00000028848	4	133140277	133147650
Sfn	ENSMUSG00000047281	4	133156471	133158083
Zdhhc18	ENSMUSG00000037553	4	133161214	133206069
Pigv	ENSMUSG00000043257	4	133216302	133228562
Arid1a	ENSMUSG00000007880	4	133234923	133312684
Rps6ka1	ENSMUSG00000003644	4	133403205	133443712
Gm17623	ENSMUSG00000091104	4	133419827	133419940
Hmgn2	ENSMUSG00000003038	4	133520653	133524565
Dhdds	ENSMUSG00000012117	4	133524943	133556833
Lin28a	ENSMUSG00000050966	4	133559245	133574756
Gm13060	ENSMUSG00000049410	4	133609753	133614911
Aim1l	ENSMUSG00000012123	4	133621827	133648419
Cd52	ENSMUSG00000000682	4	133638363	133650997
Ubxn11	ENSMUSG00000012126	4	133658485	133683508
Sh3bgrl3	ENSMUSG00000028843	4	133683321	133684704
Ccdc21	ENSMUSG00000037443	4	133685773	133743027
Gm17345	ENSMUSG00000090954	4	133697695	133709553
Gm7534	ENSMUSG00000073747	4	133746719	133758919
Catsper4	ENSMUSG00000048003	4	133767885	133783298
Cnksr1	ENSMUSG00000028841	4	133783956	133794314
Zfp593	ENSMUSG00000028840	4	133799204	133801507
Grrp1	ENSMUSG00000050105	4	133807025	133810021
Pdik1l	ENSMUSG00000050890	4	133830917	133843810
Trim63	ENSMUSG00000028834	4	133871035	133885544
Slc30a2	ENSMUSG00000028836	4	133899096	133910399
Extl1	ENSMUSG00000028838	4	133912287	133939765
Pafah2	ENSMUSG00000037366	4	133952235	133983328
Stmn1	ENSMUSG00000028832	4	134024235	134029758
Paqr7	ENSMUSG00000037348	4	134052612	134066150
2610002D18Rik	ENSMUSG00000078521	4	134066914	134079842
Fam54b	ENSMUSG00000046671	4	134081465	134091302
Sepn1	ENSMUSG00000050989	4	134093807	134108081
Man1c1	ENSMUSG00000037306	4	134117605	134260205
Ldlrap1	ENSMUSG00000037295	4	134300650	134323939
Tmem57	ENSMUSG00000028826	4	134358674	134409260
Rhd	ENSMUSG00000028825	4	134420451	134452087
Tmem50a	ENSMUSG00000028822	4	134453764	134470939
D4Wsu53e	ENSMUSG00000037266	4	134479507	134483586
Syf2	ENSMUSG00000028821	4	134486813	134493463
Runx3	ENSMUSG00000070691	4	134676567	134733905
Clic4	ENSMUSG00000037242	4	134769884	134828729
Srrm1	ENSMUSG00000028809	4	134876399	134909236
A330049M08Rik	ENSMUSG00000043924	4	134925491	134954142
Rcan3	ENSMUSG00000059713	4	134968223	134989768
Nipal3	ENSMUSG00000028803	4	135001335	135050953
4930555I21Rik	ENSMUSG00000028801	4	135050705	135093720
Grhl3	ENSMUSG00000037188	4	135097803	135129545
Gm13258	ENSMUSG00000082668	4	133128778	133129067
Gm13213	ENSMUSG00000083885	4	133194125	133194598
Gm12974	ENSMUSG00000084789	4	133372335	133373529
Gm12977	ENSMUSG00000085009	4	133427745	133432448
Gm12985	ENSMUSG00000080946	4	133438860	133439042
Gm13061	ENSMUSG00000087288	4	133574062	133575784
Gm13131	ENSMUSG00000081772	4	133755745	133756065
E130218I03Rik	ENSMUSG00000086322	4	133799577	133801788
Gm13195	ENSMUSG00000083065	4	133891413	133891673
1700021N21Rik	ENSMUSG00000087343	4	134004681	134006086
Gm13250	ENSMUSG00000083001	4	134049137	134049889
Gm16225	ENSMUSG00000086884	4	134674136	134676362
Gm16224	ENSMUSG00000084986	4	134699336	134700200
Gm12983	ENSMUSG00000087270	4	134846281	134846590
Gm12984	ENSMUSG00000085002	4	134863264	134865434
Gm12982	ENSMUSG00000082833	4	134863696	134863885
Gm12991	ENSMUSG00000084032	4	134933073	134933150
Gm12990	ENSMUSG00000081136	4	134959104	134959571
Gm15979	ENSMUSG00000087016	4	134986041	134986756
BX537327.1	ENSMUSG00000093031	4	133209917	133210170
AL669982.1	ENSMUSG00000092812	4	134024279	134024369
U4	ENSMUSG00000084555	4	133353497	133353634
AL670720.1	ENSMUSG00000080474	4	135068266	135068394
U6	ENSMUSG00000089321	4	133439314	133439413
Mir700	ENSMUSG00000076123	4	134972470	134972548
AL645531.1	ENSMUSG00000093225	4	134350946	134351019
U6	ENSMUSG00000088179	4	135139663	135139763
1700029M20Rik	ENSMUSG00000086788	4	135182570	135186113
Il28ra	ENSMUSG00000062157	4	135242202	135264096
Gm12989	ENSMUSG00000083678	4	135271783	135272513
Il22ra1	ENSMUSG00000037157	4	135284087	135308055
9130219A07Rik	ENSMUSG00000054579	4	135308094	135311298
Myom3	ENSMUSG00000037139	4	135315630	135371479
Gm12988	ENSMUSG00000082743	4	135312133	135312610
Gm13045	ENSMUSG00000082407	4	142992247	142993316
Gm13042	ENSMUSG00000083930	4	143048281	143050441
1700012P22Rik	ENSMUSG00000028589	4	144008092	144028675
Lrrc38	ENSMUSG00000028584	4	142939660	142960935
Pramel1	ENSMUSG00000041805	4	142984331	142990063
Pramef8	ENSMUSG00000046862	4	143002329	143010994
Oog4	ENSMUSG00000047799	4	143027067	143040227
Gm13040	ENSMUSG00000070616	4	143101215	143132374
Gm13043	ENSMUSG00000073726	4	143101215	143107736
Gm13057	ENSMUSG00000078514	4	143101246	143148137
BC080695	ENSMUSG00000070618	4	143157378	143163701
Gm13083	ENSMUSG00000066688	4	143204906	143208498
Gm13088	ENSMUSG00000078513	4	143243663	143247149
Gm13089	ENSMUSG00000070617	4	143286403	143292614
Gm13078	ENSMUSG00000046435	4	143309358	143319061
Gm13023	ENSMUSG00000066031	4	143379237	143385488
Gm13084	ENSMUSG00000059218	4	143399148	143405996
Gm13103	ENSMUSG00000029451	4	143436400	143443540
Pramef6	ENSMUSG00000078512	4	143484140	143490283
Gm13109	ENSMUSG00000078511	4	143538077	143544602
Gm13101	ENSMUSG00000078510	4	143554421	143556853
Pramef17	ENSMUSG00000078509	4	143581022	143584272
Gm13102	ENSMUSG00000073723	4	143696377	143700004
Oog3	ENSMUSG00000050810	4	143747460	143752566
Oog2	ENSMUSG00000066030	4	143780622	143787534
C87977	ENSMUSG00000046262	4	143796678	143803221
Pramel5	ENSMUSG00000036749	4	143860536	143870391
Gm13128	ENSMUSG00000078508	4	143920152	143923368
Gm13119	ENSMUSG00000070619	4	143947845	143954322
Gm13125	ENSMUSG00000073721	4	143962663	143967836
Pramef12	ENSMUSG00000028591	4	143981577	143998367
Gm9944	ENSMUSG00000054345	4	144041123	144043544
Aadacl3	ENSMUSG00000078507	4	144043674	144053659
9430007A20Rik	ENSMUSG00000028593	4	144109725	144119256
Gm13124	ENSMUSG00000078506	4	144144903	144155037
Gm13177	ENSMUSG00000070609	4	144203610	144213301
[truncated: 6,162 more rows]

## Sheet: wk14IgG3-FHA
Gene Name	Ensembl Gene ID	Chromosome	Start	End
Mreg	ENSMUSG00000039395	1	72205807	72258881
Pecr	ENSMUSG00000026189	1	72305741	72330888
Tmem169	ENSMUSG00000026188	1	72330943	72349678
Xrcc5	ENSMUSG00000026187	1	72353995	72441526
March4	ENSMUSG00000039372	1	72473686	72583504
Smarcal1	ENSMUSG00000039354	1	72629825	72679708
Ankar	ENSMUSG00000039342	1	72689554	72747138
Rpl37a	ENSMUSG00000046330	1	72757834	72760383
Igfbp2	ENSMUSG00000039323	1	72871077	72899048
Igfbp5	ENSMUSG00000026185	1	72904506	72921458
Tnp1	ENSMUSG00000026182	1	73061657	73062473
Tns1	ENSMUSG00000055322	1	73956805	74171021
Gm15843	ENSMUSG00000085812	1	72506073	72506601
D230017M19Rik	ENSMUSG00000085769	1	72283039	72321443
AC120136.3	ENSMUSG00000093333	1	72301582	72301772
AC120136.2	ENSMUSG00000093247	1	72283520	72283710
AC120136.1	ENSMUSG00000093111	1	72290787	72290977
5S_rRNA	ENSMUSG00000088666	1	73810284	73810409
U2	ENSMUSG00000075752	1	72272814	72273004
Rufy4	ENSMUSG00000061815	1	74172115	74194797
Cxcr2	ENSMUSG00000026180	1	74200563	74207812
Cxcr1	ENSMUSG00000048480	1	74238359	74241205
Mir1928	ENSMUSG00000087820	1	74253128	74253194
U6	ENSMUSG00000075767	1	74259387	74259493
Arpc2	ENSMUSG00000006304	1	74283071	74314783
Gpbar1	ENSMUSG00000064272	1	74325124	74326198
Aamp	ENSMUSG00000006299	1	74326421	74331254
Pnkd	ENSMUSG00000026179	1	74331504	74400268
Tmbim1	ENSMUSG00000006301	1	74334821	74352196
Gm216	ENSMUSG00000073650	1	74408682	74415895
Slc11a1	ENSMUSG00000026177	1	74421777	74432636
Pign	ENSMUSG00000056536	1	107417716	107555585
2310035C23Rik	ENSMUSG00000026319	1	107560438	107651708
Tnfrsf11a	ENSMUSG00000026321	1	107677300	107744558
Zcchc2	ENSMUSG00000038866	1	107886983	107930651
Phlpp1	ENSMUSG00000044340	1	108068329	108290827
Bcl2	ENSMUSG00000057329	1	108434755	108610851
Kdsr	ENSMUSG00000009905	1	108616987	108656319
Vps4b	ENSMUSG00000009907	1	108660648	108693305
Serpinb5	ENSMUSG00000067006	1	108757750	108779925
Serpinb12	ENSMUSG00000059956	1	108831026	108853657
Serpinb13	ENSMUSG00000048775	1	108877561	108897772
Serpinb3a	ENSMUSG00000044594	1	108942164	108948914
Serpinb3d	ENSMUSG00000058017	1	108974744	108980083
Serpinb3b	ENSMUSG00000073602	1	109050517	109174938
Serpinb3c	ENSMUSG00000073601	1	109167778	109174948
Serpinb11	ENSMUSG00000026327	1	109258506	109277052
Serpinb7	ENSMUSG00000067001	1	109296232	109349266
Gm3608	ENSMUSG00000067017	1	107352560	107353433
Gm10193	ENSMUSG00000067015	1	107661021	107661251
D630008O14Rik	ENSMUSG00000054006	1	108438520	108471622
Pou2f3-rs1	ENSMUSG00000083613	1	108784429	108785474
Gm8080	ENSMUSG00000084228	1	108916714	108921902
Gm15388	ENSMUSG00000083884	1	109034421	109035146
Gm8084	ENSMUSG00000080729	1	109088052	109090134
Gm15390	ENSMUSG00000081114	1	109150130	109150867
Gm8089	ENSMUSG00000084189	1	109186918	109198931
Gm15391	ENSMUSG00000087210	1	109281777	109283989
AC132082.1	ENSMUSG00000076999	1	107471264	107471359
U6	ENSMUSG00000089206	1	107842131	107842237
SNORA17	ENSMUSG00000089278	1	109336624	109336754
Rasal2	ENSMUSG00000070565	1	159065314	159342726
2810025M15Rik	ENSMUSG00000049881	1	159342483	159350366
BC026585	ENSMUSG00000033488	1	159388711	159419191
Sec16b	ENSMUSG00000026589	1	159436859	159498556
Fam5b	ENSMUSG00000004031	1	160175402	160286391
Astn1	ENSMUSG00000026587	1	160292471	160621917
Pappa2	ENSMUSG00000073530	1	160641862	160887870
1600012P17Rik	ENSMUSG00000047661	1	160888258	160910621
Gm4953	ENSMUSG00000061992	1	161098288	161098773
Gm6058	ENSMUSG00000087632	1	159314062	159314460
Gm15486	ENSMUSG00000087093	1	159428006	159441852
Mir488	ENSMUSG00000070103	1	160435756	160435864
Wdr26	ENSMUSG00000038733	1	183103359	183142109
A430110L20Rik	ENSMUSG00000054135	1	183156207	183158621
Cnih3	ENSMUSG00000026514	1	183282759	183390772
Ccdc121	ENSMUSG00000050625	1	183439764	183441582
Dnahc14	ENSMUSG00000047369	1	183669119	183699805
Lbr	ENSMUSG00000004880	1	183745447	183772532
Gm5533	ENSMUSG00000056699	1	183781739	183783320
Enah	ENSMUSG00000022995	1	183834576	183950111
Srp9	ENSMUSG00000026511	1	184054868	184062538
Vmn1r1	ENSMUSG00000091013	1	184087275	184088450
Degs1	ENSMUSG00000038633	1	184205903	184212935
Fbxo28	ENSMUSG00000047539	1	184243233	184271737
Gm10517	ENSMUSG00000073482	1	184338750	184339151
Trp53bp2	ENSMUSG00000026510	1	184339303	184392563
Capn2	ENSMUSG00000026509	1	184397391	184447655
Gm16721	ENSMUSG00000087419	1	184414398	184414958
Capn8	ENSMUSG00000038599	1	184495138	184562483
4922505E12Rik	ENSMUSG00000043429	1	184677388	184679253
Susd4	ENSMUSG00000038576	1	184693991	184826729
Tlr5	ENSMUSG00000079164	1	184884919	184906175
Rpl35a-ps2	ENSMUSG00000081214	1	183172076	183172498
Gm16547	ENSMUSG00000089888	1	183330595	183330887
Gm16539	ENSMUSG00000089927	1	183361854	183362531
U6	ENSMUSG00000064970	1	183743738	183743831
5S_rRNA	ENSMUSG00000089429	1	183770584	183770699
Grb14	ENSMUSG00000026888	2	64750533	64863044
Cobll1	ENSMUSG00000034903	2	64926396	65077460
Slc38a11	ENSMUSG00000061171	2	65154487	65202091
Scn3a	ENSMUSG00000057182	2	65295175	65405684
Scn2a1	ENSMUSG00000075318	2	65458914	65605504
Csrnp3	ENSMUSG00000044647	2	65683824	65869603
Galnt3	ENSMUSG00000026994	2	65920823	65963051
Ttc21b	ENSMUSG00000034848	2	66022384	66094674
Scn1a	ENSMUSG00000064329	2	66108838	66278897
Scn9a	ENSMUSG00000075316	2	66318137	66473009
Gm13578	ENSMUSG00000084104	2	64706056	64706645
Gm13594	ENSMUSG00000086881	2	65076813	65077732
Gm13592	ENSMUSG00000083707	2	65115474	65116483
Gm13593	ENSMUSG00000080766	2	65134235	65135426
Gm13595	ENSMUSG00000086701	2	65347322	65350662
Gm13619	ENSMUSG00000052865	2	65690465	65698676
Gm13617	ENSMUSG00000085160	2	65782356	65792127
Gm13616	ENSMUSG00000080728	2	65983711	65983932
Gm13618	ENSMUSG00000086671	2	66025893	66030870
Gm13630	ENSMUSG00000085386	2	66247551	66259645
Gm13629	ENSMUSG00000087301	2	66278937	66384083
Rpl35-ps1	ENSMUSG00000080855	2	66285093	66285464
Gm13627	ENSMUSG00000081307	2	66367471	66368803
SNORA17	ENSMUSG00000088197	2	65214226	65214339
7SK	ENSMUSG00000088994	2	66440572	66440855
SNORD26	ENSMUSG00000088306	2	65966189	65966268
Phactr3	ENSMUSG00000027525	2	177853680	178073197
Sycp2	ENSMUSG00000060445	2	178079998	178142390
Ppp1r3d	ENSMUSG00000049999	2	178145911	178149177
9030418K01Rik	ENSMUSG00000070476	2	178149229	178159133
Cdh26	ENSMUSG00000039155	2	178165236	178222071
4930591A17Rik	ENSMUSG00000039138	2	179149641	179151587
Cdh4	ENSMUSG00000000305	2	179177136	179634078
Gm10711	ENSMUSG00000074518	2	179628614	179629398
Taf4a	ENSMUSG00000039117	2	179646851	179711351
Lsm14b	ENSMUSG00000039108	2	179759692	179770170
Psma7	ENSMUSG00000027566	2	179771078	179777138
Ss18l1	ENSMUSG00000039086	2	179777214	179804906
Gtpbp5	ENSMUSG00000039069	2	179805293	179820607
Hrh3	ENSMUSG00000039059	2	179834170	179839193
Osbpl2	ENSMUSG00000039050	2	179854011	179897385
Adrm1	ENSMUSG00000039041	2	179906190	179910991
Lama5	ENSMUSG00000015647	2	179911078	179960564
Rps21	ENSMUSG00000039001	2	179992082	179993150
Cables2	ENSMUSG00000038990	2	179993245	180008201
BC066135	ENSMUSG00000038980	2	180012351	180024584
Gm14314	ENSMUSG00000082215	2	178754824	178755838
Gm14292	ENSMUSG00000061897	2	178912130	178912585
Gm14293	ENSMUSG00000081481	2	178975195	178975771
Gm14294	ENSMUSG00000081882	2	179098998	179099748
Gm14300	ENSMUSG00000083410	2	179347327	179348272
4921531C22Rik	ENSMUSG00000085704	2	179710698	179713718
Gm14299	ENSMUSG00000082850	2	179727893	179728289
Gm17180	ENSMUSG00000090589	2	179834618	179836207
Mir3091	ENSMUSG00000092827	2	179992241	179992316
AL663067.1	ENSMUSG00000080507	2	179725502	179725587
Gata5	ENSMUSG00000015627	2	180059838	180069404
Gm14318	ENSMUSG00000056061	2	180067562	180075437
Slco4a1	ENSMUSG00000038963	2	180190950	180209572
B230312C02Rik	ENSMUSG00000084843	2	180105196	180120590
Mir133a-2	ENSMUSG00000065460	2	180133084	180133187
Mir1a-1	ENSMUSG00000070144	2	180123753	180123829
Ntsr1	ENSMUSG00000027568	2	180234681	180279685
1600027N09Rik	ENSMUSG00000027569	2	180316009	180321009
Ogfr	ENSMUSG00000049401	2	180323950	180330541
Col9a3	ENSMUSG00000027570	2	180332495	180356894
Tcfl5	ENSMUSG00000038932	2	180356661	180377413
Dido1	ENSMUSG00000038914	2	180392669	180444704
U6	ENSMUSG00000064422	2	180432768	180432874
2310003C23Rik	ENSMUSG00000027573	2	180444822	180453438
Slc17a9	ENSMUSG00000023393	2	180459968	180476985
Bhlhe23	ENSMUSG00000045493	2	180509086	180511605
Ythdf1	ENSMUSG00000038848	2	180639082	180655654
Birc7	ENSMUSG00000038840	2	180663728	180668715
Nkain4	ENSMUSG00000027574	2	180669477	180689404
Arfgap1	ENSMUSG00000027575	2	180701930	180717231
9230112E08Rik	ENSMUSG00000070461	2	180718937	180720296
Col20a1	ENSMUSG00000016356	2	180721240	180752245
Chrna4	ENSMUSG00000027577	2	180753085	180778251
Kcnq2	ENSMUSG00000016346	2	180810284	180869996
Eef1a2	ENSMUSG00000016349	2	180882358	180891719
Ppdpf	ENSMUSG00000016344	2	180921952	180923476
Ptk6	ENSMUSG00000038751	2	180928426	180937494
Srms	ENSMUSG00000027579	2	180940267	180947890
Gm14343	ENSMUSG00000087550	2	180500919	180510108
Gm14340	ENSMUSG00000074507	2	180553048	180559335
Gm14342	ENSMUSG00000086166	2	180564195	180624365
Gm14344	ENSMUSG00000085428	2	180571186	180583619
Gm14339	ENSMUSG00000085728	2	180582357	180583751
Gm14341	ENSMUSG00000087293	2	180689169	180701517
Gm14398	ENSMUSG00000083993	2	180951432	180952504
Mir124a-3	ENSMUSG00000065454	2	180628736	180628822
HAR1F	ENSMUSG00000088334	2	180572532	180572663
U6	ENSMUSG00000084696	2	180918217	180918320
BC051628	ENSMUSG00000047841	2	180954718	180957559
BC006779	ENSMUSG00000027580	2	180962320	180976732
Gmeb2	ENSMUSG00000038705	2	180986154	181022740
Stmn3	ENSMUSG00000027581	2	181041164	181049205
Rtel1	ENSMUSG00000038685	2	181054444	181091321
Arfrp1	ENSMUSG00000038671	2	181092395	181100109
Zgpat	ENSMUSG00000027582	2	181099633	181118333
Lime1	ENSMUSG00000090077	2	181114783	181118333
Zbtb46	ENSMUSG00000027583	2	181122467	181194131
Abhd16b	ENSMUSG00000055882	2	181227911	181229685
Tpd52l2	ENSMUSG00000000827	2	181231847	181252671
Dnajc5	ENSMUSG00000000826	2	181255190	181289838
Uckl1	ENSMUSG00000089917	2	181303854	181319597
Znf512b	ENSMUSG00000000823	2	181316808	181327508
Prpf6	ENSMUSG00000002455	2	181326573	181390365
Samd10	ENSMUSG00000038605	2	181329923	181333917
Sox18	ENSMUSG00000046470	2	181404541	181406345
Tcea2	ENSMUSG00000059540	2	181415015	181422776
Rgs19	ENSMUSG00000002458	2	181423124	181428682
4930526D03Rik	ENSMUSG00000045794	2	181431498	181433147
Oprl1	ENSMUSG00000027584	2	181449721	181455690
Myt1	ENSMUSG00000010505	2	181498037	181562502
Pcmtd2	ENSMUSG00000027589	2	181572559	181592166
Polr3k	ENSMUSG00000038628	2	181599042	181605535
Gm14496	ENSMUSG00000053277	2	181725841	181731135
Gm14447	ENSMUSG00000084033	2	181026853	181027640
Slc2a4rg-ps	ENSMUSG00000085028	2	181118955	181122291
Gm16119	ENSMUSG00000010492	2	181313185	181319875
Gm14489	ENSMUSG00000082786	2	181458747	181459647
Gm5466	ENSMUSG00000083397	2	181631528	181633417
U1	ENSMUSG00000088378	2	181247255	181247417
U6	ENSMUSG00000089612	2	181160640	181160742
U6	ENSMUSG00000077518	2	181397011	181397117
Gm8935	ENSMUSG00000045699	3	12855996	12856403
Gm2464	ENSMUSG00000078587	3	13471906	13474596
Ralyl	ENSMUSG00000039717	3	13776848	14182287
U7	ENSMUSG00000088540	3	14401731	14401788
SNORA17	ENSMUSG00000089231	3	14267315	14267439
7SK	ENSMUSG00000088546	3	13845686	13845980
7SK	ENSMUSG00000084684	3	14029482	14029762
Slc7a12	ENSMUSG00000039710	3	14480697	14505830
Lrrcc1	ENSMUSG00000027550	3	14533788	14572658
Gm17119	ENSMUSG00000090300	3	14564402	14564681
E2f5	ENSMUSG00000027552	3	14578671	14606308
1810022K09Rik	ENSMUSG00000078784	3	14606320	14611221
Car13	ENSMUSG00000027555	3	14641727	14663002
Gm5843	ENSMUSG00000084092	3	14722416	14729626
Car1	ENSMUSG00000027556	3	14766217	14778459
Car3	ENSMUSG00000027559	3	14863538	14872351
Car2	ENSMUSG00000027562	3	14886426	14900769
Gm9733	ENSMUSG00000078783	3	15296551	15332302
Sirpb1a	ENSMUSG00000044138	3	15371656	15426520
Sirpb1b	ENSMUSG00000078781	3	15495754	15575065
Sirpb1c	ENSMUSG00000074677	3	15695145	15748528
Gm5150	ENSMUSG00000078780	3	15848070	15906332
AC098884.1	ENSMUSG00000076975	3	15913818	15913927
RNaseP_nuc	ENSMUSG00000088874	3	16015615	16015943
Ythdf3	ENSMUSG00000047213	3	16083183	16117035
U6	ENSMUSG00000088644	3	16723249	16723312
SNORA48	ENSMUSG00000088541	3	17151301	17151444
Gm5844	ENSMUSG00000082896	3	17908806	17910996
Gm6369	ENSMUSG00000040217	3	18433861	18434289
Gm16093	ENSMUSG00000087108	3	19127780	19140987
Gm6141	ENSMUSG00000084339	3	19484791	19485538
Dnajc5b	ENSMUSG00000027606	3	19408595	19510862
Gm10742	ENSMUSG00000074674	3	17683514	17686898
Cypt12	ENSMUSG00000027564	3	17848444	17848952
Bhlhe22	ENSMUSG00000025128	3	17954325	17957509
Cyp7b1	ENSMUSG00000039519	3	17971950	18143338
Armc1	ENSMUSG00000027599	3	19032146	19063065
Mtfr1	ENSMUSG00000027601	3	19087327	19120817
Pde7a	ENSMUSG00000069094	3	19123108	19211322
1700064H15Rik	ENSMUSG00000082766	3	19510368	19528677
Trim55	ENSMUSG00000060913	3	19544460	19591599
Crh	ENSMUSG00000049796	3	19593401	19595396
U1	ENSMUSG00000065175	3	19460253	19460416
Mir124a-2	ENSMUSG00000093073	3	17695662	17695770
U6atac	ENSMUSG00000087893	3	17703621	17703747
U1	ENSMUSG00000064594	3	18077462	18077625
7SK	ENSMUSG00000089149	3	19230773	19231084
4632415L05Rik	ENSMUSG00000048106	3	19794886	19795962
Hps3	ENSMUSG00000027615	3	19895945	19935315
Hps3	ENSMUSG00000078774	3	19916917	19924958
Cp	ENSMUSG00000003617	3	19857054	19909145
Gyg	ENSMUSG00000019528	3	20021970	20055216
Hltf	ENSMUSG00000002428	3	19957811	20018376
Cpa3	ENSMUSG00000001865	3	20115516	20142080
Cpb1	ENSMUSG00000011463	3	20148163	20174655
Agtr1b	ENSMUSG00000054988	3	20213395	20266099
Gm6634	ENSMUSG00000086538	3	70576301	70611213
Sis	ENSMUSG00000027790	3	72692479	72771785
U2	ENSMUSG00000084752	3	72541753	72541903
Slitrk3	ENSMUSG00000048304	3	72852048	72860865
7SK	ENSMUSG00000088794	3	73011625	73011923
AC131665.1	ENSMUSG00000077050	3	72950771	72950880
Bche	ENSMUSG00000027792	3	73439730	73512337
Nfkb1	ENSMUSG00000028163	3	135247619	135354511
Gm9799	ENSMUSG00000045520	3	135390302	135391702
Slc39a8	ENSMUSG00000053897	3	135488243	135551536
Bank1	ENSMUSG00000037922	3	135716327	135989030
Ppp3ca	ENSMUSG00000028161	3	136333088	136600691
Gm10955	ENSMUSG00000078574	3	136615239	136625603
Emcn	ENSMUSG00000054690	3	137004031	137095149
Gm4861	ENSMUSG00000055138	3	137213009	137215586
Gm16500	ENSMUSG00000091791	3	135626423	135626782
U6	ENSMUSG00000065906	3	136730856	136730962
Ddit4l	ENSMUSG00000046818	3	137284576	137291297
AC140486.1	ENSMUSG00000080330	3	137284438	137284557
U6	ENSMUSG00000064460	3	137378622	137378728
H2afz	ENSMUSG00000037894	3	137527451	137529886
Dnajb14	ENSMUSG00000074212	3	137530639	137579521
Lamtor3	ENSMUSG00000091512	3	137581490	137591729
Dapp1	ENSMUSG00000028159	3	137593971	137644509
Gm5105	ENSMUSG00000049349	3	137711725	137730352
1110002E22Rik	ENSMUSG00000090066	3	137728016	137744376
Mttp	ENSMUSG00000028158	3	137752819	137806352
Rg9mtd2	ENSMUSG00000004127	3	137806412	137822785
4930579F01Rik	ENSMUSG00000012042	3	137827099	137849677
Adh7	ENSMUSG00000055301	3	137880787	137896346
Adh1	ENSMUSG00000074207	3	137923955	137953662
Adh6a	ENSMUSG00000053054	3	137976250	137994098
Gm15460	ENSMUSG00000081829	3	137567973	137568363
Gm16559	ENSMUSG00000089635	3	137944372	137969986
U6	ENSMUSG00000088932	3	137575954	137576052
U1	ENSMUSG00000087752	3	138006102	138006260
Adh6b	ENSMUSG00000074206	3	138015342	138021825
Adh6-ps1	ENSMUSG00000090306	3	138037085	138051255
Adh4	ENSMUSG00000037797	3	138078430	138093856
Adh5	ENSMUSG00000028138	3	138106057	138118463
Metap1	ENSMUSG00000005813	3	138121924	138152346
Eif4e	ENSMUSG00000028156	3	138189155	138220563
Mir1956	ENSMUSG00000088373	3	138189385	138189449
Gm6289	ENSMUSG00000074196	3	144542286	144558975
AI747448	ENSMUSG00000074195	3	144573885	144595493
Clca6	ENSMUSG00000068547	3	144615444	144638009
Clca3	ENSMUSG00000028255	3	144667501	144695740
Clca5	ENSMUSG00000036960	3	144733229	144762068
Odf2l	ENSMUSG00000028256	3	144781553	144816879
Col24a1	ENSMUSG00000028197	3	144955436	145214975
Znhit6	ENSMUSG00000074182	3	145239172	145268209
Cyr61	ENSMUSG00000028195	3	145309935	145312949
Ddah1	ENSMUSG00000028194	3	145421639	145557241
Bcl10	ENSMUSG00000028191	3	145587322	145597247
2410004B18Rik	ENSMUSG00000036873	3	145600978	145607793
Syde2	ENSMUSG00000036863	3	145650834	145684684
Wdr63	ENSMUSG00000043020	3	145703490	145771094
Mcoln3	ENSMUSG00000036853	3	145780423	145804770
Mcoln2	ENSMUSG00000011008	3	145812797	145858477
Lpar3	ENSMUSG00000036832	3	145883925	145949178
Ssx2ip	ENSMUSG00000036825	3	146067606	146103103
Dnase2b	ENSMUSG00000028185	3	146067777	146259576
Ctbs	ENSMUSG00000028189	3	146113434	146128813
Spata1	ENSMUSG00000028188	3	146120167	146162717
Gng5	ENSMUSG00000068523	3	146162798	146168536
Rpf1	ENSMUSG00000028187	3	146169312	146184387
Uox	ENSMUSG00000028186	3	146260041	146295269
4930503B20Rik	ENSMUSG00000090202	3	146308157	146314281
Samd13	ENSMUSG00000048652	3	146308159	146348556
Prkacb	ENSMUSG00000005034	3	146392543	146475924
Gm10288	ENSMUSG00000070343	3	146501775	146502311
Ttll7	ENSMUSG00000036745	3	146515331	146646973
Gm16233	ENSMUSG00000085773	3	144610525	144617842
Gm16325	ENSMUSG00000085810	3	146304896	146314679
Gm17501	ENSMUSG00000090771	3	145313276	145315057
U1	ENSMUSG00000065937	3	145779066	145779218
U6	ENSMUSG00000088218	3	146050706	146050808
AC124987.1	ENSMUSG00000077892	3	146062098	146062181
Gm2442	ENSMUSG00000091938	4	41941480	41943464
Gm10596	ENSMUSG00000073880	4	41954088	41955014
Gm3893	ENSMUSG00000078744	4	41961930	41963010
Gm13304	ENSMUSG00000073878	4	41985540	41986640
Gm13306	ENSMUSG00000073877	4	42024159	42029562
Gm13305	ENSMUSG00000073876	4	42029565	42039326
1700045I11Rik	ENSMUSG00000091473	4	42041568	42042058
Gm10595	ENSMUSG00000073875	4	42090151	42090576
Gm10931	ENSMUSG00000078363	4	42214615	42216999
Gm1987	ENSMUSG00000078739	4	42231045	42232176
Gm2023	ENSMUSG00000078736	4	42248504	42250497
Gm10930	ENSMUSG00000078362	4	42285129	42290096
Gm2500	ENSMUSG00000078361	4	42336528	42337018
Gm2002	ENSMUSG00000078735	4	42339260	42349021
Gm2506	ENSMUSG00000078734	4	42349017	42354405
Ccl21c	ENSMUSG00000078732	4	42391951	42393082
Gm7819	ENSMUSG00000078731	4	42415576	42416656
Gm10929	ENSMUSG00000078360	4	42423572	42424498
Gm10594	ENSMUSG00000073873	4	42472325	42472750
4933409K07Rik	ENSMUSG00000073874	4	42473137	42474846
Gm2542	ENSMUSG00000078727	4	42536112	42541707
Gm10592	ENSMUSG00000073871	4	42594227	42595153
Gm2163	ENSMUSG00000078725	4	42602069	42603149
Gm10591	ENSMUSG00000073869	4	42625653	42626784
Ccl27b	ENSMUSG00000066202	4	42664149	42669537
Il11ra2	ENSMUSG00000066201	4	42668807	42679295
Gm9969	ENSMUSG00000055406	4	42681536	42682026
Gm10590	ENSMUSG00000073868	4	42728458	42733425
4930578G10Rik	ENSMUSG00000054885	4	42749077	42859120
Ccl19	ENSMUSG00000071005	4	42768057	42770109
Ccl21a	ENSMUSG00000071003	4	42786392	42787525
Gm12394	ENSMUSG00000078722	4	42795460	42869643
Gm12429	ENSMUSG00000078721	4	42860943	42866760
BC049635	ENSMUSG00000050141	4	42880876	42887106
N28178	ENSMUSG00000036062	4	42929532	42957624
Dnajb5	ENSMUSG00000036052	4	42962686	42972297
1700022I11Rik	ENSMUSG00000028451	4	42982818	42996511
Vcp	ENSMUSG00000028452	4	42992835	43013379
Fancg	ENSMUSG00000028453	4	43015215	43023378
Pigo	ENSMUSG00000028454	4	43030507	43038691
Stoml2	ENSMUSG00000028455	4	43040562	43044582
B230312A22Rik	ENSMUSG00000036002	4	43045286	43059092
Unc13b	ENSMUSG00000028456	4	43071825	43277745
Atp8b5	ENSMUSG00000028457	4	43280031	43386705
Rusc2	ENSMUSG00000035969	4	43394851	43439960
Fam166b	ENSMUSG00000042788	4	43439891	43442006
Tesk1	ENSMUSG00000028458	4	43454811	43460936
Cd72	ENSMUSG00000028459	4	43459334	43467500
Sit1	ENSMUSG00000028460	4	43494953	43496606
Ccdc107	ENSMUSG00000028461	4	43505772	43508793
E130306D19Rik	ENSMUSG00000051517	4	43509014	43512567
Car9	ENSMUSG00000028463	4	43519838	43526601
Tpm2	ENSMUSG00000028464	4	43527583	43536637
Tln1	ENSMUSG00000028465	4	43544391	43575563
Creb3	ENSMUSG00000028466	4	43575204	43579932
Gba2	ENSMUSG00000028467	4	43579800	43591745
Rgp1	ENSMUSG00000028468	4	43591587	43600359
Msmp	ENSMUSG00000078719	4	43596088	43597366
Npr2	ENSMUSG00000028469	4	43644807	43664116
Spag8	ENSMUSG00000066196	4	43664207	43666466
Hint2	ENSMUSG00000028470	4	43667099	43669338
4930412F15Rik	ENSMUSG00000043633	4	43672494	43682017
Tmem8b	ENSMUSG00000078716	4	43681843	43705540
Olfr70	ENSMUSG00000050215	4	43707872	43713679
Olfr71	ENSMUSG00000046450	4	43718500	43723103
Hrct1	ENSMUSG00000071001	4	43740070	43741511
Olfr159	ENSMUSG00000044801	4	43782922	43783881
Olfr156	ENSMUSG00000059448	4	43833207	43834305
Olfr157	ENSMUSG00000059101	4	43847624	43849389
Olfr155	ENSMUSG00000071000	4	43864437	43868335
Reck	ENSMUSG00000028476	4	43888402	43957678
Gm17599	ENSMUSG00000091065	4	43043871	43045354
Olfr269-ps1	ENSMUSG00000083417	4	43780348	43780649
Olfr29-ps1	ENSMUSG00000081420	4	43794253	43795200
Gm12492	ENSMUSG00000081329	4	43811768	43813127
Gm16972	ENSMUSG00000086983	4	43058906	43066125
Gm3892	ENSMUSG00000073881	4	41925875	41960431
Gm13299	ENSMUSG00000087577	4	41992336	42024158
Ccl19-ps3	ENSMUSG00000084036	4	42003282	42004894
Gm17167	ENSMUSG00000091542	4	42077721	42106036
Gm13301	ENSMUSG00000083929	4	42087631	42104185
Gm13300	ENSMUSG00000081989	4	42104736	42107058
Gm5859	ENSMUSG00000073879	4	42107582	42109905
Gm17081	ENSMUSG00000090338	4	42110448	42110925
Gm7819	ENSMUSG00000078729	4	42418155	42452715
Gm13309	ENSMUSG00000083726	4	42435300	42436901
Gm10593	ENSMUSG00000073872	4	42566010	42600570
Gm12395	ENSMUSG00000085910	4	42750125	42751626
Gm12454	ENSMUSG00000087142	4	43517300	43521619
Gm12472	ENSMUSG00000085351	4	43600944	43621627
Gm12473	ENSMUSG00000086043	4	43644411	43654405
Gm12481	ENSMUSG00000043770	4	43676833	43677211
5430416O09Rik	ENSMUSG00000028475	4	43742906	43747406
A630077J23Rik	ENSMUSG00000086864	4	43768995	43772336
5S_rRNA	ENSMUSG00000088947	4	43705558	43705689
AL732626.1	ENSMUSG00000092675	4	43644297	43644429
U7	ENSMUSG00000089028	4	43214021	43214085
RNase_MRP	ENSMUSG00000088088	4	43505660	43505930
SNORA17	ENSMUSG00000077552	4	43149371	43149500
Glipr2	ENSMUSG00000028480	4	43970273	43991990
Ccin	ENSMUSG00000070999	4	43996376	43998405
Clta	ENSMUSG00000028478	4	44017324	44045718
Gm11262	ENSMUSG00000083629	4	78343556	78344832
Gm12913	ENSMUSG00000082697	4	78419581	78420125
Gm11263	ENSMUSG00000083496	4	78973612	78974360
Gm11409	ENSMUSG00000084248	4	79520255	79520657
Gm11407	ENSMUSG00000082179	4	79648235	79649292
Gm11408	ENSMUSG00000083076	4	79649300	79649818
Gm11410	ENSMUSG00000083219	4	79649893	79651035
Gm11406	ENSMUSG00000082555	4	80086302	80086785
Gm11247	ENSMUSG00000083578	4	80229883	80230190
SNORA17	ENSMUSG00000089543	4	78890491	78890613
Mpdz	ENSMUSG00000028402	4	80924404	81088719
Nfib	ENSMUSG00000008575	4	81936077	82351654
Zdhhc21	ENSMUSG00000028403	4	82444642	82505862
Cer1	ENSMUSG00000038192	4	82527655	82531052
Frem1	ENSMUSG00000059049	4	82543825	82698243
Gm11765	ENSMUSG00000081391	4	81101847	81107636
Gm11411	ENSMUSG00000083385	4	81342345	81343063
Gm11412	ENSMUSG00000087540	4	81389050	81392605
Gm12914	ENSMUSG00000087608	4	81576382	81578278
Gm11264	ENSMUSG00000087110	4	81679216	81711794
Gm5860	ENSMUSG00000085022	4	81711335	81748712
Gm11266	ENSMUSG00000087413	4	82153920	82193196
Gm11267	ENSMUSG00000084851	4	82230952	82233223
Gm11268	ENSMUSG00000084357	4	82288304	82288570
Gm11269	ENSMUSG00000086293	4	82338709	82339615
Gm11248	ENSMUSG00000082637	4	82767386	82767666
n-R5s187	ENSMUSG00000084718	4	81564417	81564527
SNORA17	ENSMUSG00000077607	4	80984178	80984308
n-R5s188	ENSMUSG00000084595	4	82085314	82085418
SNORA17	ENSMUSG00000089409	4	82724415	82724533
AL591611.1	ENSMUSG00000092661	4	81707016	81707125
Ttc39b	ENSMUSG00000038172	4	82866204	82970159
Snapc3	ENSMUSG00000028483	4	83063628	83113580
Psip1	ENSMUSG00000028484	4	83101584	83132363
Gm11185	ENSMUSG00000083245	4	82839892	82840898
Gm11413	ENSMUSG00000086321	4	83024221	83036572
Gm11184	ENSMUSG00000087592	4	83028968	83038109
U6	ENSMUSG00000064951	4	82931708	82931814
Gm10154	ENSMUSG00000066116	4	83151051	83151458
4930473A06Rik	ENSMUSG00000052407	4	83171449	83510635
Gm11414	ENSMUSG00000082416	4	83146403	83146665
Cbx3-ps3	ENSMUSG00000080793	4	83346988	83347940
Gm11415	ENSMUSG00000085378	4	83530642	83534762
U4	ENSMUSG00000064606	4	83173532	83173672
Gm17452	ENSMUSG00000092143	4	146120857	146399068
Gm13225	ENSMUSG00000078503	4	145100662	145129091
Gm13242	ENSMUSG00000058186	4	145104787	145294344
Gm13212	ENSMUSG00000078502	4	145175069	145215248
Gm13235	ENSMUSG00000078500	4	145458697	145489878
Gm13248	ENSMUSG00000063245	4	145539879	145587078
Gm13247	ENSMUSG00000056300	4	145658647	145696012
Gm13251	ENSMUSG00000070605	4	145727747	145749016
Rex2	ENSMUSG00000078499	4	145881315	145887868
Gm13051	ENSMUSG00000066009	4	146064699	146094022
Zfp600	ENSMUSG00000066007	4	146124225	146166156
Tnfrsf8	ENSMUSG00000028602	4	144857040	144905067
Gm13124	ENSMUSG00000078506	4	144144903	144155037
Gm13177	ENSMUSG00000070609	4	144203610	144213301
Gm436	ENSMUSG00000078505	4	144259840	144276271
Gm13178	ENSMUSG00000041735	4	144293094	144311307
Gm438	ENSMUSG00000078504	4	144367107	144376486
Dhrs3	ENSMUSG00000066026	4	144482730	144518112
Vps13d	ENSMUSG00000073719	4	144562526	144564586
Vps13d	ENSMUSG00000020220	4	144562529	144784898
Tnfrsf1b	ENSMUSG00000028599	4	144803366	144836773
Gm13127	ENSMUSG00000070610	4	144177147	144178535
Prdx2-rs3	ENSMUSG00000083998	4	144381740	144382563
Gm13024	ENSMUSG00000082758	4	144980846	144981563
Gm13224	ENSMUSG00000084272	4	144994209	144994302
Gm13227	ENSMUSG00000085101	4	145000148	145039659
Gm13230	ENSMUSG00000082082	4	145036643	145040791
Gm13223	ENSMUSG00000083081	4	145045536	145046282
Smarca5-ps	ENSMUSG00000052912	4	145054107	145057323
Gm13229	ENSMUSG00000087076	4	145059612	145059953
Gm13228	ENSMUSG00000082352	4	145164431	145165064
Gm13226	ENSMUSG00000083454	4	145166792	145167195
Gm13222	ENSMUSG00000080732	4	145168939	145169076
Gm13234	ENSMUSG00000083562	4	145222407	145223153
Gm13231	ENSMUSG00000081885	4	145231260	145234302
Gm13249	ENSMUSG00000081983	4	145236674	145237018
Gm13239	ENSMUSG00000082615	4	145279745	145280381
Gm13232	ENSMUSG00000084279	4	145319484	145320115
Gm13244	ENSMUSG00000082334	4	145335649	145337304
Gm13236	ENSMUSG00000087513	4	145352832	145354861
Gm13243	ENSMUSG00000081192	4	145364622	145365186
1700029I01Rik	ENSMUSG00000084350	4	145415140	145419845
Gm13238	ENSMUSG00000082999	4	145427122	145427901
Gm13246	ENSMUSG00000083235	4	145434307	145434621
Gm13240	ENSMUSG00000081710	4	145593263	145593827
Gm13233	ENSMUSG00000083038	4	145615727	145617410
Gm13237	ENSMUSG00000066002	4	145632857	145633949
1700095A21Rik	ENSMUSG00000086046	4	145651166	145679000
Gm13245	ENSMUSG00000081998	4	145717113	145717372
Gm13241	ENSMUSG00000073716	4	145721928	145722710
Gm4169	ENSMUSG00000090683	4	145914740	145915894
Gm13036	ENSMUSG00000081595	4	146026177	146026924
Gm13034	ENSMUSG00000082195	4	146034925	146038329
Gm13035	ENSMUSG00000083733	4	146040658	146040999
Gm13165	ENSMUSG00000086654	4	146134923	146173133
Gm17609	ENSMUSG00000090398	4	145191866	145301871
Gm17565	ENSMUSG00000090554	4	145686275	145688945
AL929465.1	ENSMUSG00000080584	4	145454975	145455095
U1	ENSMUSG00000077327	4	144355530	144355695
Amtn	ENSMUSG00000029282	5	88805133	88814941
Ambn	ENSMUSG00000029288	5	88885036	88897552
Enam	ENSMUSG00000029286	5	88917007	88935074
Igj	ENSMUSG00000067149	5	88949537	88956916
Utp3	ENSMUSG00000070697	5	88983508	88985108
Rufy3	ENSMUSG00000029291	5	88994065	89080415
Grsf1	ENSMUSG00000044221	5	89088473	89105196
Mob1b	ENSMUSG00000006262	5	89149880	89191083
Dck	ENSMUSG00000029366	5	89194021	89212306
Slc4a4	ENSMUSG00000060961	5	89315843	89668678
Gc	ENSMUSG00000035540	5	89846549	89886790
Npffr2	ENSMUSG00000035528	5	89956454	90012765
Adamts3	ENSMUSG00000043635	5	90102866	90312359
Cox18	ENSMUSG00000035505	5	90643749	90653026
Ankrd17	ENSMUSG00000055204	5	90656215	90795211
Mkrn1-ps1	ENSMUSG00000082389	5	89267034	89268427
Eif5al3-ps	ENSMUSG00000043618	5	90561254	90561700
Gm15682	ENSMUSG00000082438	5	89168272	89168754
SNORA17	ENSMUSG00000077175	5	90257896	90258024
AC117578.1	ENSMUSG00000080523	5	90762598	90762651
7SK	ENSMUSG00000084500	5	90110941	90111264
Dhx37	ENSMUSG00000029480	5	125894230	125914491
Bri3bp	ENSMUSG00000037905	5	125921938	125941242
Aacs	ENSMUSG00000029482	5	125956184	125997782
Tmem132b	ENSMUSG00000070498	5	126102858	126179143
Tmem132b	ENSMUSG00000029483	5	126259004	126268438
Gm4868	ENSMUSG00000091970	5	126328322	126329110
Tmem132c	ENSMUSG00000034324	5	127722178	128046163
1700085B03Rik	ENSMUSG00000087104	5	127737228	127762004
U6	ENSMUSG00000070220	5	126869918	126870024
U6	ENSMUSG00000084551	5	126994245	126994351
Slc15a4	ENSMUSG00000029416	5	128076034	128113267
Glt1d1	ENSMUSG00000049971	5	128112632	128189124
Tmem132d	ENSMUSG00000034310	5	128263861	128938937
Gm17132	ENSMUSG00000061331	5	128357703	128358860
Gm17131	ENSMUSG00000085328	5	128358901	128362746
AC166933.1	ENSMUSG00000077816	5	128941118	128941211
Auts2	ENSMUSG00000029673	5	131913205	133019214
7SK	ENSMUSG00000088123	5	133277548	133277826
Gm10051	ENSMUSG00000058905	5	133950950	133951446
Zan	ENSMUSG00000079173	5	137819865	137918292
Epo	ENSMUSG00000029711	5	137923487	137974470
Pop7	ENSMUSG00000029715	5	137942666	137943746
Gigyf1	ENSMUSG00000029714	5	137960108	137969162
Gnb2	ENSMUSG00000029713	5	137969355	137974738
Actl6b	ENSMUSG00000029712	5	137994745	138010810
Tfr2	ENSMUSG00000029716	5	138011079	138028709
Mospd3	ENSMUSG00000037221	5	138037873	138042286
Pcolce	ENSMUSG00000029718	5	138046331	138055012
Fbxo24	ENSMUSG00000089984	5	138053731	138070230
Lrch4	ENSMUSG00000093445	5	138070349	138082327
Lrch4	ENSMUSG00000029720	5	138070403	138084127
Sap25	ENSMUSG00000079165	5	138082562	138084130
Irs3	ENSMUSG00000047182	5	138084260	138086942
Agfg2	ENSMUSG00000029722	5	138091711	138125954
6430598A04Rik	ENSMUSG00000045348	5	138172111	138182835
Tsc22d4	ENSMUSG00000029723	5	138186958	138209678
Ppp1r35	ENSMUSG00000029725	5	138220077	138221338
Mepce	ENSMUSG00000029726	5	138223134	138227943
Zcwpw1	ENSMUSG00000037108	5	138229026	138263849
Pilra	ENSMUSG00000046245	5	138263180	138277506
Pilrb1	ENSMUSG00000066684	5	138293375	138299277
Pilrb2	ENSMUSG00000066682	5	138307057	138312986
Cyp3a13	ENSMUSG00000029727	5	138334160	138362847
Gjc3	ENSMUSG00000056966	5	138395037	138404187
Azgp1	ENSMUSG00000037053	5	138422749	138431461
Gm4963	ENSMUSG00000063739	5	138434275	138434652
Smok3a	ENSMUSG00000075599	5	138462504	138475893
Smok3b	ENSMUSG00000075598	5	138478452	138491863
Zkscan1	ENSMUSG00000029729	5	138526312	138549050
Zscan21	ENSMUSG00000037017	5	138558131	138575493
Zfp113	ENSMUSG00000037007	5	138580930	138596972
Cops6	ENSMUSG00000019494	5	138602299	138605874
Mcm7	ENSMUSG00000029730	5	138605811	138613650
Ap4m1	ENSMUSG00000019518	5	138613230	138619936
Taf6	ENSMUSG00000036980	5	138619845	138628679
Cnpy4	ENSMUSG00000036968	5	138628713	138635146
Mblac1	ENSMUSG00000049285	5	138635542	138636628
Gm454	ENSMUSG00000089783	5	138644837	138648536
BC055004	ENSMUSG00000047592	5	138667126	138694591
0910001L09Rik	ENSMUSG00000050552	5	138696836	138700626
BC037034	ENSMUSG00000036948	5	138700884	138705280
BC037034	ENSMUSG00000091964	5	138700886	138705274
Gal3st4	ENSMUSG00000075593	5	138706149	138714068
Gpc2	ENSMUSG00000029510	5	138706180	138721233
Stag3	ENSMUSG00000036928	5	138721468	138753621
Gm10874	ENSMUSG00000075591	5	138804947	138829515
Zfp157	ENSMUSG00000036898	5	138882696	138901922
1700123K08Rik	ENSMUSG00000029526	5	139003068	139005922
Zfp68	ENSMUSG00000058291	5	139045844	139060989
A430033K04Rik	ENSMUSG00000056014	5	139064087	139090052
Fam20c	ENSMUSG00000025854	5	139230468	139286031
Pdgfa	ENSMUSG00000025856	5	139451968	139473324
Gm17247	ENSMUSG00000090903	5	139461462	139461950
6330403L08Rik	ENSMUSG00000075585	5	139471010	139476530
Prkar1b	ENSMUSG00000025855	5	139493260	139625955
Heatr2	ENSMUSG00000025857	5	139626177	139662464
Sun1	ENSMUSG00000036817	5	139676591	139725794
Get4	ENSMUSG00000025858	5	139728278	139746005
Adap1	ENSMUSG00000056413	5	139747830	139801576
Cox19	ENSMUSG00000045438	5	139812143	139821187
Cyp2w1	ENSMUSG00000029541	5	139828571	139832987
3110082I17Rik	ENSMUSG00000053553	5	139835693	139936456
Gpr146	ENSMUSG00000044197	5	139853696	139872369
D830046C22Rik	ENSMUSG00000021206	5	139854174	139855213
C130050O18Rik	ENSMUSG00000044092	5	139881234	139891577
Gm17112	ENSMUSG00000090873	5	137973651	137981946
Gm16089	ENSMUSG00000081228	5	138056855	138057190
Gm15498	ENSMUSG00000079163	5	138126382	138131979
Gm15753	ENSMUSG00000082088	5	138161582	138162968
Gm15502	ENSMUSG00000083813	5	138337980	138338187
Smok3c	ENSMUSG00000079156	5	138494423	138507767
6330418K02Rik	ENSMUSG00000085227	5	138705271	138707889
Got2-ps1	ENSMUSG00000080935	5	138805488	138806780
Gm5564	ENSMUSG00000046440	5	138946066	138947174
Gm15497	ENSMUSG00000081142	5	139051967	139052517
Gm15672	ENSMUSG00000086873	5	139623530	139626647
Mir93	ENSMUSG00000065527	5	138606751	138606838
Mir339	ENSMUSG00000065593	5	139845604	139845699
U6	ENSMUSG00000064892	5	138819819	138819925
AC125115.1	ENSMUSG00000092916	5	139047927	139048009
Mir106b	ENSMUSG00000065514	5	138606965	138607046
Mir25	ENSMUSG00000065394	5	138606549	138606632
U4	ENSMUSG00000084469	5	138660965	138661044
Gpr30	ENSMUSG00000053647	5	139899105	139903754
Zfand2a	ENSMUSG00000053581	5	139947165	139960503
Uncx	ENSMUSG00000029546	5	140019448	140079180
U6	ENSMUSG00000065300	5	139919553	139919659
Micall2	ENSMUSG00000036718	5	140182647	140212290
Ints1	ENSMUSG00000029547	5	140227236	140251632
Mafk	ENSMUSG00000018143	5	140267467	140278607
Tmem184a	ENSMUSG00000036687	5	140278439	140295871
Psmg3	ENSMUSG00000029551	5	140299548	140302797
Elfn1	ENSMUSG00000048988	5	140383897	140450665
Mad1l1	ENSMUSG00000029554	5	140484643	140797506
Gm16122	ENSMUSG00000085673	5	140550059	140561466
Gm16121	ENSMUSG00000087606	5	140577153	140583545
Gm16120	ENSMUSG00000087248	5	140683339	140686705
7SK	ENSMUSG00000064694	5	140320884	140321204
Lmtk2	ENSMUSG00000038970	5	144861305	144949073
Bhlha15	ENSMUSG00000052271	5	144951155	144955310
Tecpr1	ENSMUSG00000066621	5	144955311	144984484
Bri3	ENSMUSG00000047843	5	145005306	145207626
Baiap2l1	ENSMUSG00000038859	5	145025395	145118981
Nptx2	ENSMUSG00000059991	5	145306756	145318347
Tmem130	ENSMUSG00000043388	5	145496784	145522518
Trrap	ENSMUSG00000045482	5	145528961	145620647
Smurf1	ENSMUSG00000038780	5	145637364	145726716
Kpna7	ENSMUSG00000038770	5	145744388	145844899
Gm4871	ENSMUSG00000061707	5	145790469	145793633
1700018F24Rik	ENSMUSG00000029620	5	145803859	145806547
Arpc1a	ENSMUSG00000029621	5	145844699	145869630
Arpc1b	ENSMUSG00000029622	5	145875084	145891574
Pdap1	ENSMUSG00000029623	5	145889638	145901107
Bud31	ENSMUSG00000038722	5	145901231	145908947
Ptcd1	ENSMUSG00000029624	5	145908383	145927977
Cpsf4	ENSMUSG00000029625	5	145928082	145942910
Atp5j2	ENSMUSG00000038690	5	145944567	145952931
Zkscan14	ENSMUSG00000029627	5	145955815	145962751
Zkscan5	ENSMUSG00000055991	5	145965431	145982619
Zfp655	ENSMUSG00000007812	5	145992592	146008175
Zfp498	ENSMUSG00000070420	5	146044212	146052338
Cyp3a57	ENSMUSG00000070419	5	146106148	146151381
Cyp3a16	ENSMUSG00000038656	5	146197178	146230592
Cyp3a41b	ENSMUSG00000075552	5	146319544	146345599
Cyp3a41a	ENSMUSG00000075551	5	146505635	146531712
Cyp3a44	ENSMUSG00000054417	5	146585559	146617450
Cyp3a11	ENSMUSG00000056035	5	146666002	146691540
Cyp3a25	ENSMUSG00000029630	5	146788770	146821194
Cyp3a59	ENSMUSG00000061292	5	146890834	146924861
2900089D17Rik	ENSMUSG00000087484	5	145002559	145017055
Gm15708	ENSMUSG00000086894	5	145037930	145041382
Gm15709	ENSMUSG00000083574	5	145167471	145167683
Gm6272	ENSMUSG00000082524	5	145484496	145484666
SNORA70	ENSMUSG00000088685	5	145535294	145535422
AC127411.1	ENSMUSG00000093455	5	145957917	145958194
Gm6309	ENSMUSG00000079096	5	146979552	146996880
Rnf6	ENSMUSG00000029634	5	147020768	147033131
Cdk8	ENSMUSG00000029635	5	147042806	147114450
Gm15739	ENSMUSG00000080957	5	147060127	147060998
Wasf3	ENSMUSG00000029636	5	147196561	147283987
Mir5105	ENSMUSG00000093077	5	147072579	147072660
Gsx1	ENSMUSG00000053129	5	148000272	148002523
Gm17398	ENSMUSG00000091377	5	148211130	148213493
Pdx1	ENSMUSG00000029644	5	148081535	148089584
Cdx2	ENSMUSG00000029646	5	148112381	148118846
Prhoxnb	ENSMUSG00000075543	5	148126562	148134016
Flt3	ENSMUSG00000042817	5	148142317	148212065
Pan3	ENSMUSG00000029647	5	148241737	148360078
Flt1	ENSMUSG00000029648	5	148373180	148537587
Mtif3	ENSMUSG00000016510	5	147763149	147775376
Lnx2	ENSMUSG00000016520	5	147828231	147888162
Polr1d	ENSMUSG00000029642	5	147888626	147922937
Gm15633	ENSMUSG00000083988	5	147912138	147912629
2210019I11Rik	ENSMUSG00000092570	5	148040172	148083097
Gm6054	ENSMUSG00000057157	5	148220558	148220935
Gm6370	ENSMUSG00000079094	5	147302938	147305530
4930449I24Rik	ENSMUSG00000079093	5	147314004	147316759
Gm3402	ENSMUSG00000041505	5	147325701	147328300
Gm3404	ENSMUSG00000079091	5	147337377	147340129
Gm3409	ENSMUSG00000079090	5	147349252	147351825
Gm3415	ENSMUSG00000079089	5	147367740	147370313
Gpr12	ENSMUSG00000041468	5	147393727	147396815
Usp12	ENSMUSG00000029640	5	147546385	147606582
Rpl21	ENSMUSG00000041453	5	147644466	147648608
Rasl11a	ENSMUSG00000029641	5	147656647	147659302
Gm10858	ENSMUSG00000075546	5	147705790	147708726
Gtf3a	ENSMUSG00000016503	5	147760233	147767190
SNORA17	ENSMUSG00000077735	5	148011700	148011829
SNORD102	ENSMUSG00000077185	5	147646410	147646480
SNORA27	ENSMUSG00000077564	5	147646720	147646848
Pomp	ENSMUSG00000029649	5	148672204	148687354
Slc46a3	ENSMUSG00000029650	5	148690013	148706391
Mtus2	ENSMUSG00000029651	5	148768896	149127641
Gm15721	ENSMUSG00000085565	5	148761458	148768742
Tfec	ENSMUSG00000029553	6	16783381	16848441
Tes	ENSMUSG00000029552	6	17015149	17055828
Cav2	ENSMUSG00000000058	6	17231185	17239115
Cav1	ENSMUSG00000007655	6	17256335	17291452
Met	ENSMUSG00000009376	6	17413800	17523980
Capza2	ENSMUSG00000015733	6	17586234	17616972
St7	ENSMUSG00000029534	6	17642933	17893025
Wnt2	ENSMUSG00000010797	6	17938940	17980585
Asz1	ENSMUSG00000010796	6	18000964	18059061
Cftr	ENSMUSG00000041301	6	18120687	18272768
Cttnbp2	ENSMUSG00000000416	6	18316478	18465338
Gm5721	ENSMUSG00000081744	6	16875231	16876926
Gm15473	ENSMUSG00000084772	6	17008806	17014996
Gm4876	ENSMUSG00000054556	6	17015010	17121833
D830026I12Rik	ENSMUSG00000085171	6	17147751	17160152
Gm15581	ENSMUSG00000085264	6	17156823	17335604
Gm13898	ENSMUSG00000086409	6	17660598	17661225
Gm13899	ENSMUSG00000081077	6	17661687	17662941
Gm15593	ENSMUSG00000084203	6	18094734	18095741
Gm15596	ENSMUSG00000082289	6	18106337	18107120
Gm15592	ENSMUSG00000087389	6	18220136	18239048
Gm15595	ENSMUSG00000080767	6	18244271	18245231
Gm15594	ENSMUSG00000084947	6	18374684	18377885
U6	ENSMUSG00000064965	6	17386306	17386412
AC027654.1	ENSMUSG00000093271	6	18399271	18399340
Naa38	ENSMUSG00000044155	6	18798579	18805751
Ankrd7	ENSMUSG00000029517	6	18816318	18829586
Gm5874	ENSMUSG00000071568	6	18774552	18775058
Gm16854	ENSMUSG00000085607	6	18794220	18797360
U6	ENSMUSG00000065051	6	18677292	18677398
7SK	ENSMUSG00000084650	6	18996837	18997151
Gm4604	ENSMUSG00000091845	6	108090114	108090503
Il5ra	ENSMUSG00000005364	6	106660378	106695103
Trnt1	ENSMUSG00000013736	6	106719114	106732468
Crbn	ENSMUSG00000005362	6	106728243	106750068
Lrrn1	ENSMUSG00000034648	6	107479779	107520204
Setmar	ENSMUSG00000034639	6	108015039	108027116
Sumf1	ENSMUSG00000030101	6	108057022	108135576
Itpr1	ENSMUSG00000030102	6	108163112	108501103
Cntn4	ENSMUSG00000064293	6	105627654	106649304
AC167724.1	ENSMUSG00000093127	6	107398813	107398938
U6	ENSMUSG00000064466	6	106951446	106951552
Gm16433	ENSMUSG00000043024	6	108513599	108515582
0610040F04Rik	ENSMUSG00000087341	6	108527033	108610928
Gm17055	ENSMUSG00000090576	6	108606911	108609411
Bhlhe40	ENSMUSG00000030103	6	108610623	108616919
Arl8b	ENSMUSG00000030105	6	108733053	108773717
Edem1	ENSMUSG00000030104	6	108778635	108809350
Gm6749	ENSMUSG00000068102	6	108831995	108832405
Grm7	ENSMUSG00000056755	6	110595575	111517224
Gm20387	ENSMUSG00000092448	6	110589747	110595910
Gm4968	ENSMUSG00000062365	6	127183774	127184637
Parp11	ENSMUSG00000037997	6	127396858	127444259
Efcab4b	ENSMUSG00000061414	6	127527993	127579956
Prmt8	ENSMUSG00000030350	6	127639029	127719490
Tspan11	ENSMUSG00000030351	6	127837607	127903049
Tspan9	ENSMUSG00000030352	6	127911414	128093612
Gm10010	ENSMUSG00000056771	6	128137864	128150641
Tead4	ENSMUSG00000030353	6	128174306	128250841
Tulp3	ENSMUSG00000001521	6	128271158	128305869
5930416I19Rik	ENSMUSG00000048668	6	128307018	128312929
Foxm1	ENSMUSG00000001517	6	128312985	128325911
4933413G19Rik	ENSMUSG00000079304	6	128325474	128335162
Nrip2	ENSMUSG00000001520	6	128349314	128358950
Itfg2	ENSMUSG00000001518	6	128359462	128374949
Fkbp4	ENSMUSG00000030357	6	128379753	128388695
Pzp	ENSMUSG00000030359	6	128433585	128476738
BC048546	ENSMUSG00000047228	6	128489840	128531624
Klrb1a	ENSMUSG00000030361	6	128559245	128572952
Gm5884	ENSMUSG00000037827	6	128594931	128596409
Clec2j	ENSMUSG00000030363	6	128602456	128607050
Clec2h	ENSMUSG00000030364	6	128612404	128627389
Klrb1	ENSMUSG00000079299	6	128656526	128673064
Klrb1c	ENSMUSG00000030325	6	128728503	128739233
Klrb1b	ENSMUSG00000079298	6	128763724	128776349
BC035044	ENSMUSG00000090164	6	128798062	128841144
Clec2i	ENSMUSG00000030365	6	128837606	128848185
Clec2g	ENSMUSG00000000248	6	128884399	128970537
Klrb1f	ENSMUSG00000030154	6	128995919	129007489
Clec2e	ENSMUSG00000030155	6	129041850	129050934
Klrb1-ps1	ENSMUSG00000079295	6	129066536	129079464
Gm16186	ENSMUSG00000081935	6	128980855	128981694
Clec2f-ps	ENSMUSG00000089728	6	128968600	128970537
9330179D12Rik	ENSMUSG00000084922	6	127099407	127162429
Gm7308	ENSMUSG00000081113	6	127232081	127232527
Gm15870	ENSMUSG00000085813	6	127884707	127894857
Rpl18-ps2	ENSMUSG00000053173	6	128263363	128263978
Gm15862	ENSMUSG00000085739	6	128331602	128349758
Gm10069	ENSMUSG00000059659	6	128388775	128425635
Gm8724	ENSMUSG00000058700	6	128480936	128481322
Gm15987	ENSMUSG00000085786	6	128901222	128925047
Gm8778	ENSMUSG00000079223	6	128926884	128927990
BC064078	ENSMUSG00000087150	6	128942979	128958058
Gm16187	ENSMUSG00000082694	6	128955642	128957979
Gm17703	ENSMUSG00000090933	6	128306022	128308857
Gm17395	ENSMUSG00000090617	6	128793804	128796977
AC144778.1	ENSMUSG00000076327	6	128044935	128045044
7SK	ENSMUSG00000088177	6	127799239	127799537
Dll3	ENSMUSG00000003436	7	29076673	29087257
BC089491	ENSMUSG00000046750	7	29069671	29076205
Ttc9b	ENSMUSG00000007944	7	28438934	28441227
Sertad1	ENSMUSG00000008384	7	28271929	28275335
Sertad3	ENSMUSG00000055200	7	28258787	28262378
Gm17248	ENSMUSG00000090904	7	28712743	28716022
Timm50	ENSMUSG00000003438	7	29090535	29097091
Supt5h	ENSMUSG00000003435	7	29099917	29123738
Rps16	ENSMUSG00000037563	7	29135671	29137715
Plekhg2	ENSMUSG00000037552	7	29144623	29157681
Map3k10	ENSMUSG00000040390	7	28441394	28459617
C030039L03Rik	ENSMUSG00000057093	7	28474359	28491503
Zfp60	ENSMUSG00000037640	7	28516408	28538721
Zfp626	ENSMUSG00000030604	7	28592223	28603811
Zfp59	ENSMUSG00000078779	7	28627874	28641995
Zfp607	ENSMUSG00000020420	7	28647576	28664586
1700049G17Rik	ENSMUSG00000070709	7	28692411	28714479
Zfp780b	ENSMUSG00000063047	7	28747727	28759804
Zfp850	ENSMUSG00000074608	7	28769875	28770815
Psmc4	ENSMUSG00000030603	7	28826726	28835120
Fcgbp	ENSMUSG00000047730	7	28856255	28905881
Gm10935	ENSMUSG00000078384	7	28884679	28887506
Zfp36	ENSMUSG00000044786	7	29161803	29164274
Med29	ENSMUSG00000003444	7	29171165	29177727
Paf1	ENSMUSG00000003437	7	29177970	29184407
Samd4b	ENSMUSG00000037513	7	29184568	29208857
Gmfg	ENSMUSG00000060791	7	29222466	29233252
Lrfn1	ENSMUSG00000030600	7	29237257	29252567
Il28a	ENSMUSG00000059128	7	29293855	29295474
Il28b	ENSMUSG00000060747	7	29307760	29309366
Sycn	ENSMUSG00000084174	7	29325904	29327229
Nccrp1	ENSMUSG00000047586	7	29328615	29332273
Pak4	ENSMUSG00000030602	7	29343838	29383204
Gm15883	ENSMUSG00000086868	7	27909500	27915693
Gm15567	ENSMUSG00000084974	7	28034282	28042951
Gm15570	ENSMUSG00000083622	7	28056787	28057411
Pgam1-ps2	ENSMUSG00000082016	7	28254790	28255554
Gm15541	ENSMUSG00000087371	7	28287737	28293141
Gm10651	ENSMUSG00000074243	7	28734174	28734782
Shkbp1	ENSMUSG00000089832	7	28127152	28141038
Gm20479	ENSMUSG00000092367	7	28137668	28142438
Spnb4	ENSMUSG00000011751	7	28141402	28232705
Blvrb	ENSMUSG00000040466	7	28232997	28251163
Prx	ENSMUSG00000053198	7	28284343	28305233
Hipk4	ENSMUSG00000040424	7	28308280	28316194
Pld3	ENSMUSG00000003363	7	28317019	28338237
2310022A10Rik	ENSMUSG00000049643	7	28338314	28367113
9530053A07Rik	ENSMUSG00000078776	7	28914485	28949830
Fbl	ENSMUSG00000046865	7	28954765	28964288
Dyrk1b	ENSMUSG00000002409	7	28964488	28972313
Eid2	ENSMUSG00000046058	7	29052900	29054184
Eid2b	ENSMUSG00000070705	7	29062725	29065148
Vmn1r185	ENSMUSG00000091924	7	27396040	27397183
Cyp2b23	ENSMUSG00000040650	7	27450246	27471456
Cyp2b19	ENSMUSG00000066704	7	27542182	27557649
Cyp2g1	ENSMUSG00000049685	7	27593946	27606216
Cyp2a5	ENSMUSG00000005547	7	27620324	27628567
Cyp2a22	ENSMUSG00000091867	7	27716650	27724405
Cyp2a12	ENSMUSG00000060407	7	27814109	27821826
Cyp2f2	ENSMUSG00000052974	7	27904928	27918679
Cyp2t4	ENSMUSG00000078787	7	27938733	27943687
Egln2	ENSMUSG00000058709	7	27943677	27951821
Rab4b	ENSMUSG00000053291	7	27953443	27963915
Mia1	ENSMUSG00000089661	7	27953449	27966176
Snrpa	ENSMUSG00000061479	7	27972024	27981290
BC024978	ENSMUSG00000078786	7	27980800	27990405
Itpkc	ENSMUSG00000003752	7	27992191	28013647
Adck4	ENSMUSG00000003762	7	28018042	28047271
Numbl	ENSMUSG00000063160	7	28043452	28067163
Ltbp4	ENSMUSG00000040488	7	28090155	28122711
Akt2	ENSMUSG00000004056	7	28376571	28425845
Mir1191	ENSMUSG00000080533	7	27990555	27990674
SNORA40	ENSMUSG00000077711	7	29136527	29136651
Mir3101	ENSMUSG00000093348	7	27961025	27961112
U6	ENSMUSG00000064793	7	28908273	28908378
AC157561.1	ENSMUSG00000080562	7	28148333	28148420
C330005M16Rik	ENSMUSG00000037469	7	29392653	29416351
Fbxo27	ENSMUSG00000037463	7	29477868	29484357
Fbxo17	ENSMUSG00000030598	7	29501823	29523163
Capn12	ENSMUSG00000054083	7	29666675	29678604
Actn4	ENSMUSG00000054808	7	29678267	29747359
Ech1	ENSMUSG00000053898	7	29610236	29617266
Lgals4	ENSMUSG00000053964	7	29618813	29626722
Mrps12	ENSMUSG00000045948	7	29524660	29526839
Sars2	ENSMUSG00000070699	7	29527010	29538871
Nfkbib	ENSMUSG00000030595	7	29543270	29552531
Lgals7	ENSMUSG00000053522	7	29648872	29651303
Sirt2	ENSMUSG00000015149	7	29551754	29573684
Rinl	ENSMUSG00000051735	7	29573988	29583982
Hnrnpl	ENSMUSG00000015165	7	29593560	29607285
Eif3k	ENSMUSG00000053565	7	29756392	29766883
Map4k1	ENSMUSG00000037337	7	29767073	29788298
Ryr1	ENSMUSG00000030592	7	29788359	29910170
Gm16799	ENSMUSG00000087096	7	29856622	29866153
Mir1963	ENSMUSG00000089219	7	29868655	29868713
Rasgrp4	ENSMUSG00000030589	7	29919873	29938980
Gm16282	ENSMUSG00000090009	7	29923459	29925331
Fam98c	ENSMUSG00000030590	7	29937530	29941253
1110035H17Rik	ENSMUSG00000050633	7	29940699	29941937
Spred3	ENSMUSG00000037239	7	29943848	29954860
Catsperg1	ENSMUSG00000049676	7	29966340	29999054
Ggn	ENSMUSG00000031493	7	29955239	29958952
Psmd8	ENSMUSG00000030591	7	29959207	29965692
Kcnk6	ENSMUSG00000046410	7	30006947	30017541
Yif1b	ENSMUSG00000030588	7	30023348	30032612
2200002D01Rik	ENSMUSG00000030587	7	30031580	30033451
Spint2	ENSMUSG00000074227	7	30041350	30066996
Ppp1r14a	ENSMUSG00000037166	7	30074339	30078409
Dpf1	ENSMUSG00000030584	7	30088970	30102607
Sipa1l3	ENSMUSG00000030583	7	30105397	30290479
Gm17113	ENSMUSG00000061115	7	29968055	29968402
4932431P20Rik	ENSMUSG00000074224	7	30304224	30323076
4930432E11Rik	ENSMUSG00000046958	7	30345534	30360497
6330444E15Rik	ENSMUSG00000051976	7	30363894	30364853
n-R5s153	ENSMUSG00000065385	7	30442180	30442295
Catsperg2	ENSMUSG00000049123	7	30482238	30512051
U6	ENSMUSG00000065659	7	30522337	30522443
Zfp84	ENSMUSG00000046185	7	30553571	30564840
Mir1964	ENSMUSG00000089139	7	30558313	30558395
Zfp30	ENSMUSG00000047473	7	30569017	30579721
Zfp790	ENSMUSG00000011427	7	30601091	30617061
Zfp940	ENSMUSG00000050855	7	30618639	30638688
Gm17199	ENSMUSG00000090331	7	30640659	30641074
Gm17551	ENSMUSG00000092015	7	30638104	30644044
Zfp420	ENSMUSG00000058402	7	30644998	30700678
Gm10169	ENSMUSG00000083669	7	30750237	30750584
Zfp27	ENSMUSG00000062040	7	30678352	30691591
Zfp74	ENSMUSG00000059975	7	30715834	30739108
C230062I16Rik	ENSMUSG00000063623	7	30738640	30741011
Zfp568	ENSMUSG00000074221	7	30768974	30813301
Zfp14	ENSMUSG00000053985	7	30823072	30829753
Gm10989	ENSMUSG00000078770	7	30839755	30840586
Zfp82	ENSMUSG00000058447	7	30841057	30857842
Zfp566	ENSMUSG00000078768	7	30862356	30875529
Zfp260	ENSMUSG00000049421	7	30879796	30892641
AC164703.1	ENSMUSG00000093495	7	30885859	30885954
Zfp382	ENSMUSG00000074220	7	30906961	30919684
Gm10988	ENSMUSG00000078767	7	30936893	30937764
Zfp146	ENSMUSG00000037029	7	30946293	30954746
Gm5113	ENSMUSG00000066647	7	30954894	30965228
Rps12-ps5	ENSMUSG00000081565	7	31048282	31048670
Gm17440	ENSMUSG00000092079	7	30983649	30985908
Cox7a1	ENSMUSG00000074218	7	30969190	30971047
Capns1	ENSMUSG00000001794	7	30971961	30980183
Tbcb	ENSMUSG00000006095	7	31009150	31017291
Polr2i	ENSMUSG00000019738	7	31016967	31018409
Ovol3	ENSMUSG00000056028	7	31018512	31020744
Wdr62	ENSMUSG00000037020	7	31025157	31065438
Thap8	ENSMUSG00000013928	7	31065113	31075256
Clip3	ENSMUSG00000013921	7	31076691	31093386
Alkbh6	ENSMUSG00000042831	7	31093736	31099323
AI428936	ENSMUSG00000019737	7	31099826	31104065
Sdhaf1	ENSMUSG00000074211	7	31106430	31107394
E130208F15Rik	ENSMUSG00000074210	7	31106759	31108491
AC149067.1	ENSMUSG00000093571	7	31096544	31096914
Lrfn3	ENSMUSG00000036957	7	31140533	31147791
U2	ENSMUSG00000064982	7	31141751	31141943
Tyrobp	ENSMUSG00000030579	7	31198807	31202596
Hcst	ENSMUSG00000064109	7	31202732	31204873
Nfkbid	ENSMUSG00000036931	7	31206751	31213765
Aplp1	ENSMUSG00000006651	7	31220001	31230580
Kirrel2	ENSMUSG00000036915	7	31232553	31242709
Nphs1	ENSMUSG00000006649	7	31243334	31272242
Nphs1as	ENSMUSG00000087009	7	31247183	31250610
Prodh2	ENSMUSG00000036892	7	31278641	31298421
Fgfr2	ENSMUSG00000030849	7	137305965	140315033
Zranb1	ENSMUSG00000030967	7	140122825	140178074
Ctbp2	ENSMUSG00000030970	7	140179246	140316037
4930404H21Rik	ENSMUSG00000030976	7	140778707	140793798
2700050L05Rik	ENSMUSG00000039990	7	140829226	140864654
Mmp21	ENSMUSG00000030981	7	140865953	140871744
Uros	ENSMUSG00000030979	7	140877926	140901755
Bccip	ENSMUSG00000030983	7	140901016	140912828
Dhx32	ENSMUSG00000030986	7	140912625	140974409
Fank1	ENSMUSG00000053111	7	140968544	141073215
Adam12	ENSMUSG00000054555	7	141074882	141423829
D7Ertd443e	ENSMUSG00000030994	7	141457945	141577344
Dock1	ENSMUSG00000058325	7	141862370	142365322
Fam196a	ENSMUSG00000073805	7	142073609	142130113
Gm15718	ENSMUSG00000085663	7	140171265	140175235
Gm15483	ENSMUSG00000081431	7	140930162	140930617
A130023I24Rik	ENSMUSG00000050066	7	141419157	141422388
AC125372.1	ENSMUSG00000093032	7	141131302	141131424
Nps	ENSMUSG00000073804	7	142460302	142464625
SNORA17	ENSMUSG00000077150	7	142323197	142323329
Brsk2	ENSMUSG00000053046	7	149135656	149190152
Mob2	ENSMUSG00000025147	7	149194441	149246939
Dusp8	ENSMUSG00000037887	7	149265395	149281748
Mrpl23	ENSMUSG00000037772	7	149718704	149726652
Igf2	ENSMUSG00000048583	7	149836673	149852721
Ins2	ENSMUSG00000000215	7	149864561	149885415
Gm6471	ENSMUSG00000073781	7	150017132	150038171
Th	ENSMUSG00000000214	7	150078657	150117033
Ascl2	ENSMUSG00000009248	7	150152727	150155169
Tspan32	ENSMUSG00000000244	7	150190951	150205549
Cd81	ENSMUSG00000037706	7	150238644	150253839
Trpm5	ENSMUSG00000009246	7	150255058	150280547
Tssc4	ENSMUSG00000045752	7	150255154	150256998
Kcnq1	ENSMUSG00000009545	7	150293159	150612955
Cdkn1c	ENSMUSG00000037664	7	150644255	150646955
Slc22a18	ENSMUSG00000000154	7	150659626	150685239
Phlda2	ENSMUSG00000010760	7	150687450	150688446
Nap1l4	ENSMUSG00000059119	7	150699484	150734997
Cars	ENSMUSG00000010755	7	150743135	150785995
Tnfrsf26	ENSMUSG00000045362	7	150793568	150813858
Tnfrsf22	ENSMUSG00000090852	7	150820711	150822490
Tnfrsf22	ENSMUSG00000010751	7	150820713	150835566
Tnfrsf23	ENSMUSG00000037613	7	150851714	150871777
Dusp8	ENSMUSG00000043186	7	149265407	149266592
Gm4553	ENSMUSG00000090471	7	149350929	149351642
Krtap5-2	ENSMUSG00000054759	7	149360437	149361910
Gm10153	ENSMUSG00000066101	7	149375057	149376294
Krtap5-3	ENSMUSG00000046248	7	149387269	149388920
Gm7579	ENSMUSG00000073786	7	149397764	149398495
Krtap5-5	ENSMUSG00000073785	7	149414700	149415876
Gm2431	ENSMUSG00000090455	7	149443552	149444259
Gm4559	ENSMUSG00000056885	7	149459669	149460268
Gm10013	ENSMUSG00000089731	7	149466173	149466844
Krtap5-4	ENSMUSG00000045236	7	149489407	149490408
6330512M04Rik	ENSMUSG00000045777	7	149511742	149559658
Ctsd	ENSMUSG00000007891	7	149557053	149573943
Osbpl5	ENSMUSG00000037606	7	150874667	150942890
Syt8	ENSMUSG00000031098	7	149620755	149626301
Tnni2	ENSMUSG00000031097	7	149627713	149630315
Lsp1	ENSMUSG00000018819	7	149646714	149680772
Gm14492	ENSMUSG00000043795	7	149676979	149692676
Tnnt3	ENSMUSG00000061723	7	149684741	149701914
Gm20501	ENSMUSG00000092536	7	149131223	149132018
Krtap5-1	ENSMUSG00000066100	7	149482324	149482974
Gm5054	ENSMUSG00000083812	7	149491747	149492199
Nctc1	ENSMUSG00000087090	7	149730514	149744501
H19	ENSMUSG00000000031	7	149761434	149764048
Igf2as	ENSMUSG00000086266	7	149845598	149856261
Gm7290	ENSMUSG00000078192	7	149943125	149943757
Gm15024	ENSMUSG00000052281	7	150174874	150193938
R74862	ENSMUSG00000059277	7	150207689	150239591
Gm15580	ENSMUSG00000082561	7	150782344	150782899
Gm15579	ENSMUSG00000086828	7	150786039	150787204
Mrgprg	ENSMUSG00000050276	7	150949616	150952898
Mrgpre	ENSMUSG00000048965	7	150964270	150970405
Nadsyn1	ENSMUSG00000031090	7	150981489	151008754
Dhcr7	ENSMUSG00000058454	7	151009050	151034315
Gm498	ENSMUSG00000031085	7	151052776	151083411
U6	ENSMUSG00000077668	7	149610700	149610807
AC133502.1	ENSMUSG00000092864	7	151066243	151066313
SNORA55	ENSMUSG00000088784	7	149339769	149339862
Mir3104	ENSMUSG00000092652	7	149178084	149178146
Mir483	ENSMUSG00000070140	7	149840829	149840901
AC158299.1	ENSMUSG00000076944	7	150965995	150966060
SNORA54	ENSMUSG00000065118	7	150717299	150717425
U6	ENSMUSG00000077409	7	149264236	149264342
Mir675	ENSMUSG00000076275	7	149762969	149763052
9530052E02Rik	ENSMUSG00000085270	8	11007850	11054541
E230013L22Rik	ENSMUSG00000090605	8	11477929	11480241
Col4a2	ENSMUSG00000031503	8	11312805	11449287
Gm15418	ENSMUSG00000085573	8	11187755	11204503
Gm15419	ENSMUSG00000084783	8	11399186	11417892
1700128E19Rik	ENSMUSG00000031510	8	11713264	11722620
Gm15875	ENSMUSG00000086500	8	11838978	11840400
Rab20	ENSMUSG00000031504	8	11453392	11478638
Carkd	ENSMUSG00000031505	8	11497602	11513284
Cars2	ENSMUSG00000056228	8	11514021	11550771
Ing1	ENSMUSG00000045969	8	11556066	11563250
Ankrd10	ENSMUSG00000031508	8	11611583	11635754
1700016D06Rik	ENSMUSG00000031509	8	11654921	11678750
Arhgef7	ENSMUSG00000031511	8	11728105	11835219
1700018L24Rik	ENSMUSG00000031512	8	11840474	11855761
A230072I06Rik	ENSMUSG00000074473	8	12278819	12280657
Gm5607	ENSMUSG00000047935	8	12385771	12436729
Spaca7	ENSMUSG00000010435	8	12573049	12600738
Tubgcp3	ENSMUSG00000000759	8	12614277	12672248
Myo16	ENSMUSG00000039057	8	10272572	10634741
3930402G23Rik	ENSMUSG00000038917	8	10924427	10928457
Irs2	ENSMUSG00000038894	8	10986980	11008458
Col4a1	ENSMUSG00000031502	8	11198423	11312826
7SK	ENSMUSG00000089234	8	12356153	12356469
AC102525.1	ENSMUSG00000092656	8	12396403	12396488
4931415C17Rik	ENSMUSG00000054910	8	12672186	12679229
Gm15348	ENSMUSG00000074469	8	12706944	12719127
Atp11a	ENSMUSG00000031441	8	12757014	12868728
AC127677.1	ENSMUSG00000088641	8	12666095	12666198
Mcf2l	ENSMUSG00000031442	8	12873806	13020905
Gm15350	ENSMUSG00000084780	8	12828335	12833865
Gm15347	ENSMUSG00000085465	8	12860358	12877344
Gm15353	ENSMUSG00000079146	8	12879878	12883726
Gm15351	ENSMUSG00000086770	8	12899146	12915758
Gm15349	ENSMUSG00000082682	8	12971826	12972029
Gm15352	ENSMUSG00000081951	8	13021941	13022210
F7	ENSMUSG00000031443	8	13026034	13035809
F10	ENSMUSG00000031444	8	13037308	13056676
Proz	ENSMUSG00000031445	8	13060908	13075006
Gm17023	ENSMUSG00000091443	8	13076077	13082740
Pcid2	ENSMUSG00000038542	8	13077189	13105459
Gm17022	ENSMUSG00000091784	8	13086517	13087428
Cul4a	ENSMUSG00000031446	8	13105621	13147940
Fat1	ENSMUSG00000070047	8	46035562	46137611
Mtnr1a	ENSMUSG00000054764	8	46154491	46173710
F11	ENSMUSG00000031645	8	46326524	46347385
Klkb1	ENSMUSG00000031640	8	46354796	46380213
Cyp4v3	ENSMUSG00000079057	8	46355025	46418570
Fam149a	ENSMUSG00000070044	8	46422071	46467645
Tlr3	ENSMUSG00000031639	8	46481019	46495962
Sorbs2	ENSMUSG00000031626	8	46593148	46913259
Pdlim3	ENSMUSG00000031636	8	46970839	47004900
Ccdc110	ENSMUSG00000071104	8	47019973	47029499
1700029J07Rik	ENSMUSG00000071103	8	47038960	47060606
Ufsp2	ENSMUSG00000031634	8	47060882	47082312
Ankrd37	ENSMUSG00000050914	8	47082256	47085221
Lrp2bp	ENSMUSG00000031637	8	47084657	47114831
Snx25	ENSMUSG00000038291	8	47118615	47237513
4933411K20Rik	ENSMUSG00000031631	8	47237125	47280944
Slc25a4	ENSMUSG00000031633	8	47292151	47296638
Gm10313	ENSMUSG00000071102	8	47340031	47341032
Helt	ENSMUSG00000047171	8	47377404	47380025
Acsl1	ENSMUSG00000018796	8	47556395	47621405
Mlf1ip	ENSMUSG00000031629	8	47637409	47665361
Ccdc111	ENSMUSG00000038225	8	47660933	47702566
Casp3	ENSMUSG00000031628	8	47702803	47724060
Irf2	ENSMUSG00000031627	8	47825099	47932812
Gm2366	ENSMUSG00000091546	8	46102570	46107739
Gm16675	ENSMUSG00000085052	8	47816326	47824869
AY512931	ENSMUSG00000066158	8	46146056	46150772
Gm16351	ENSMUSG00000084954	8	46673266	46682098
D330022K07Rik	ENSMUSG00000085440	8	46808679	46904651
Gm16352	ENSMUSG00000084994	8	46808682	46823393
Gm15878	ENSMUSG00000087542	8	47034966	47035271
Gm15634	ENSMUSG00000086279	8	47237964	47241454
Actg-ps1	ENSMUSG00000074978	8	47314920	47315327
U6atac	ENSMUSG00000080378	8	46949832	46949957
7SK	ENSMUSG00000088629	8	47192613	47192885
SNORA17	ENSMUSG00000077499	8	46666970	46667101
U6	ENSMUSG00000089561	8	47357405	47357501
AC114558.1	ENSMUSG00000078036	8	47166242	47166337
AC156551.1	ENSMUSG00000092897	8	47315148	47315231
Enpp6	ENSMUSG00000038173	8	48072279	48180249
Stox2	ENSMUSG00000038143	8	48265402	48437702
4930448N21Rik	ENSMUSG00000086634	8	48379626	48531716
4930579M01Rik	ENSMUSG00000086190	8	48112159	48123531
Gm10083	ENSMUSG00000060559	8	48498483	48500713
AC102862.1	ENSMUSG00000092710	8	48525772	48525905
AC102862.2	ENSMUSG00000093558	8	48547620	48547815
D030016E14Rik	ENSMUSG00000038102	8	48575469	48618824
Rwdd4a	ENSMUSG00000031568	8	48619018	48638179
Gm8623	ENSMUSG00000062458	8	48717683	48718118
Ing2	ENSMUSG00000063049	8	48752532	48760910
AA386476	ENSMUSG00000074357	8	48760745	48762409
Cdkn2aip	ENSMUSG00000038069	8	48794698	48799285
n-R5s96	ENSMUSG00000064508	8	48804600	48804723
Cngb1	ENSMUSG00000031789	8	97762945	97808081
BC016201	ENSMUSG00000058253	8	97814493	97830485
Tepp	ENSMUSG00000090206	8	97834466	97850223
Zfp319	ENSMUSG00000074140	8	97846914	97849163
Zfp319	ENSMUSG00000046556	8	97850037	97855850
AA960436	ENSMUSG00000031792	8	97856192	97871407
Mmp15	ENSMUSG00000031790	8	97876168	97898193
Gtl3	ENSMUSG00000031796	8	97944152	97958769
Csnk2a2	ENSMUSG00000046707	8	97969996	98012727
Ccdc113	ENSMUSG00000036598	8	98058000	98082788
Prss54	ENSMUSG00000048400	8	98083033	98099355
Gins3	ENSMUSG00000031669	8	98157459	98168959
Ndrg4	ENSMUSG00000036564	8	98200880	98239019
Setd6	ENSMUSG00000031671	8	98239815	98242910
Cnot1	ENSMUSG00000036550	8	98243351	98331366
Gm10094	ENSMUSG00000061104	8	98349254	98350033
Slc38a7	ENSMUSG00000036534	8	98359820	98377439
Got2	ENSMUSG00000031672	8	98388034	98412447
1700047G07Rik	ENSMUSG00000053206	8	99036240	99037431
Gm5912	ENSMUSG00000081436	8	98101371	98102808
4930513N10Rik	ENSMUSG00000074136	8	98330730	98345628
SNORA46	ENSMUSG00000065089	8	98269960	98270095
SNORA76	ENSMUSG00000065211	8	98280850	98280984
AC128668.1	ENSMUSG00000077938	8	99180029	99180119
SNORA17	ENSMUSG00000077272	8	98842387	98842518
U6	ENSMUSG00000089539	8	99746434	99746535
Mir1186b	ENSMUSG00000093084	8	98487444	98487507
AC164603.1	ENSMUSG00000077125	8	99779741	99779850
Gm5913	ENSMUSG00000081111	8	99951130	99953079
Gm16071	ENSMUSG00000081343	9	30901787	30902579
Gm7244	ENSMUSG00000091003	9	31082483	31082860
Gm3756	ENSMUSG00000091639	9	31744044	31744340
Snx19	ENSMUSG00000031993	9	30234693	30274311
Adamts15	ENSMUSG00000033453	9	30706740	30730037
Adamts8	ENSMUSG00000031994	9	30750147	30771423
Zbtb44	ENSMUSG00000047412	9	30838229	30883464
St14	ENSMUSG00000031995	9	30896987	30939438
Aplp2	ENSMUSG00000031996	9	30957142	31019400
Prdm10	ENSMUSG00000042496	9	31088123	31186128
Nfrkb	ENSMUSG00000042185	9	31193777	31228918
Tmem45b	ENSMUSG00000041737	9	31233784	31271823
Barx2	ENSMUSG00000032033	9	31653682	31721047
Arhgap32	ENSMUSG00000041444	9	31923721	32076031
Kcnj5	ENSMUSG00000032034	9	32122368	32151822
Kcnj1	ENSMUSG00000041248	9	32180003	32206777
Fli1	ENSMUSG00000016087	9	32229793	32348974
Gm17508	ENSMUSG00000091427	9	30888202	30890060
snoU13	ENSMUSG00000089569	9	31078495	31078590
U6	ENSMUSG00000064492	9	32254407	32254513
AC160635.1	ENSMUSG00000093088	9	31874756	31874881
Gm8087	ENSMUSG00000083032	9	78236708	78237274
Gm8093	ENSMUSG00000087052	9	78275314	78278612
4921509A06Rik	ENSMUSG00000091147	9	78477181	78477935
Gm8116	ENSMUSG00000059422	9	78668445	78669647
2310046A06Rik	ENSMUSG00000032355	9	76949891	77195677
Lrrc1	ENSMUSG00000032352	9	77278630	77392677
Klhl31	ENSMUSG00000044938	9	77484539	77507925
Gclc	ENSMUSG00000032350	9	77602342	77642292
Elovl5	ENSMUSG00000032349	9	77765171	77832326
Gcm1	ENSMUSG00000023333	9	77899765	77913431
Fbxo9	ENSMUSG00000001366	9	77929306	77956872
Ick	ENSMUSG00000009828	9	77956999	78019914
Gsta4	ENSMUSG00000032348	9	78039773	78057155
Gsta1	ENSMUSG00000074183	9	78078463	78090491
Dppa5b	ENSMUSG00000069620	9	78093301	78094403
Gm3776	ENSMUSG00000074181	9	78104949	78116973
Gm10639	ENSMUSG00000074179	9	78137730	78153332
Omt2a	ENSMUSG00000066463	9	78159779	78162604
Gm8074	ENSMUSG00000090802	9	78169106	78170164
Omt2b	ENSMUSG00000038750	9	78175396	78177427
Gsta2	ENSMUSG00000057933	9	78178825	78203595
Dppa5a	ENSMUSG00000060461	9	78214859	78215984
Ooep	ENSMUSG00000032346	9	78223916	78226532
4930542C12Rik	ENSMUSG00000090724	9	78242763	78243965
Ddx43	ENSMUSG00000070291	9	78243584	78271394
E330016A19Rik	ENSMUSG00000032344	9	78278333	78291044
Gm17324	ENSMUSG00000090317	9	78295672	78296593
Mto1	ENSMUSG00000032342	9	78296015	78323155
Eef1a1	ENSMUSG00000037742	9	78326256	78336958
Slc17a5	ENSMUSG00000049624	9	78384295	78435848
Cd109	ENSMUSG00000046186	9	78463353	78564060
C920006O11Rik	ENSMUSG00000087566	9	78023721	78026686
AC157995.1	ENSMUSG00000093211	9	77425521	77425596
mmu-mir-703	ENSMUSG00000076138	9	78326335	78326442
SNORA17	ENSMUSG00000077730	9	77861779	77861905
7SK	ENSMUSG00000065037	9	78023110	78023440
Col12a1	ENSMUSG00000032332	9	79446798	79566638
4930562D21Rik	ENSMUSG00000086608	9	79536583	79538714
Cox7a2	ENSMUSG00000032330	9	79603048	79607660
Tmem30a	ENSMUSG00000032328	9	79616750	79641314
4930429F24Rik	ENSMUSG00000086918	9	79641448	79651042
Filip1	ENSMUSG00000034898	9	79662858	79825611
Gm20477	ENSMUSG00000092565	9	79685915	79686194
Gm3211	ENSMUSG00000092581	9	79761007	79761438
7SK	ENSMUSG00000088908	9	79885236	79885521
Senp6	ENSMUSG00000034252	9	79914710	79992760
RP24-63G9.3	ENSMUSG00000093779	9	79921236	79921563
Gm17477	ENSMUSG00000084917	9	79966702	79969744
Myo6	ENSMUSG00000033577	9	80012838	80159536
Impg1	ENSMUSG00000032343	9	80161137	80359045
Gm17255	ENSMUSG00000090679	9	80849043	81097197
4930520O04Rik	ENSMUSG00000074039	9	114277421	114286347
Gm9888	ENSMUSG00000052724	9	114689218	114691375
Gm16142	ENSMUSG00000087469	9	115900074	115910906
Gm9385	ENSMUSG00000080848	9	115949711	115950182
4921528I07Rik	ENSMUSG00000064299	9	114185801	114226146
Bcl2a1c	ENSMUSG00000053820	9	114239253	114239696
Crtap	ENSMUSG00000032431	9	114284252	114299793
Glb1	ENSMUSG00000045594	9	114310194	114383495
Glb1	ENSMUSG00000079260	9	114310223	114316394
Ccr4	ENSMUSG00000047898	9	114399434	114405662
Trim71	ENSMUSG00000079259	9	114420393	114473487
Cnot10	ENSMUSG00000056167	9	114494996	114549192
Dync1li1	ENSMUSG00000032435	9	114597908	114633420
Cmtm6	ENSMUSG00000032434	9	114640321	114658461
Cmtm7	ENSMUSG00000032436	9	114665955	114690963
Cmtm8	ENSMUSG00000041012	9	114698463	114753270
Gpd1l	ENSMUSG00000050627	9	114808459	114843105
Gm9846	ENSMUSG00000050621	9	114891515	114891858
Osbpl10	ENSMUSG00000040875	9	114976397	115141341
Stt3b	ENSMUSG00000032437	9	115151725	115219539
Gm5921	ENSMUSG00000074034	9	115346818	115347699
Gadl1	ENSMUSG00000056880	9	115817682	115985294
Tgfbr2	ENSMUSG00000032440	9	115993415	116084383
n-R5s92	ENSMUSG00000065149	9	115535718	115535836
U6	ENSMUSG00000087925	9	114511206	114511310
AC161265.2	ENSMUSG00000080636	9	115291217	115291339
AC161265.1	ENSMUSG00000080495	9	115291078	115291196
Mir467h	ENSMUSG00000080409	9	115290937	115291057
U6	ENSMUSG00000084638	9	114747291	114747394
Cnksr3	ENSMUSG00000015202	10	3134304	3227478
Ipcef1	ENSMUSG00000064065	10	3294063	3460745
Oprm1	ENSMUSG00000000766	10	3308332	3588035
Gm10945	ENSMUSG00000078488	10	3584780	3605912
Gm15536	ENSMUSG00000081926	10	3307767	3307880
Rgs17	ENSMUSG00000019775	10	4424141	4520878
Mtrf1l	ENSMUSG00000019774	10	4522631	4534654
Fbxo5	ENSMUSG00000019773	10	4540941	4547381
Vip	ENSMUSG00000019772	10	4698927	4707323
Myct1	ENSMUSG00000046916	10	4739754	4752813
Syne1	ENSMUSG00000019769	10	4795849	5326338
AC162387.1	ENSMUSG00000092769	10	4659162	4659257
U6	ENSMUSG00000077596	10	4989262	4989368
Gm10097	ENSMUSG00000061261	10	5277031	5277348
Esr1	ENSMUSG00000019768	10	5340927	5734948
AC161829.1	ENSMUSG00000093189	10	5310085	5310366
SNORD88	ENSMUSG00000084430	10	5570951	5571041
Gm16153	ENSMUSG00000085687	10	5923172	5937508
Gm221	ENSMUSG00000019767	10	5784310	5864039
1700052N19Rik	ENSMUSG00000061759	10	5891400	5914074
Rmnd1	ENSMUSG00000019763	10	5914153	5944626
Zbtb2	ENSMUSG00000075327	10	5958433	5979467
Akap12	ENSMUSG00000038587	10	5987073	6080212
Mthfd1l	ENSMUSG00000040675	10	6179460	6373423
U1	ENSMUSG00000065371	10	5862148	5862307
U8	ENSMUSG00000089473	10	6176523	6176654
U1	ENSMUSG00000065792	10	6242072	6242228
RNase_MRP	ENSMUSG00000088375	10	5778328	5778567
Gm16074	ENSMUSG00000082247	10	6353727	6354170
Gm16148	ENSMUSG00000082605	10	6399450	6400342
Plekhg1	ENSMUSG00000040624	10	6379238	6606177
5S_rRNA	ENSMUSG00000089392	10	6411664	6411772
Gm16149	ENSMUSG00000082123	10	6476934	6477242
Iyd	ENSMUSG00000019762	10	6791664	6806301
Ppp1r14c	ENSMUSG00000040653	10	6881566	6980391
H60c	ENSMUSG00000091618	10	7078791	7088611
9230019H11Rik	ENSMUSG00000071434	10	7216995	7226702
Gm16760	ENSMUSG00000086086	10	6979406	6982468
AC155833.1	ENSMUSG00000080655	10	6921426	6921518
Gm16254	ENSMUSG00000087350	10	7325882	7326611
Gm20470	ENSMUSG00000092190	10	7463318	7480897
B430219N15Rik	ENSMUSG00000085211	10	7500066	7501155
Gm15560	ENSMUSG00000081497	10	7527914	7528556
Lrp11	ENSMUSG00000019796	10	7309598	7345281
Pcmt1	ENSMUSG00000019795	10	7349171	7400934
Nup43	ENSMUSG00000040034	10	7387301	7398679
Lats1	ENSMUSG00000040021	10	7401007	7436256
Katna1	ENSMUSG00000019794	10	7445798	7482948
BC013529	ENSMUSG00000040006	10	7487745	7512598
6530403G13Rik	ENSMUSG00000052979	10	7512321	7512620
Ppil4	ENSMUSG00000015757	10	7512689	7542933
Zc3h12d	ENSMUSG00000039981	10	7552268	7590195
Tab2	ENSMUSG00000015755	10	7625451	7676028
Ust	ENSMUSG00000047712	10	7924551	8238623
Sash1	ENSMUSG00000015305	10	8442017	8605868
Gm17280	ENSMUSG00000091633	10	8604392	8606678
U6	ENSMUSG00000077582	10	8362732	8362837
Mir5104	ENSMUSG00000093060	10	7556179	7556272
SNORA36	ENSMUSG00000065692	10	8543809	8543945
AC091522.1	ENSMUSG00000093360	10	8498358	8498428
SNORA40	ENSMUSG00000088857	10	7568159	7568279
Gm9930	ENSMUSG00000053980	10	9252329	9255479
Samd5	ENSMUSG00000060487	10	9347057	9395006
Utrn	ENSMUSG00000019820	10	12101986	12589163
Stx11	ENSMUSG00000039232	10	12659787	12684065
Sf3b5	ENSMUSG00000078348	10	12728256	12728988
Plagl1	ENSMUSG00000019817	10	12810497	12851500
Fam164b	ENSMUSG00000019815	10	12869346	12897829
Ltv1	ENSMUSG00000019814	10	12898446	12912943
Phactr2	ENSMUSG00000062866	10	12933201	13194202
Fuca2	ENSMUSG00000019810	10	13219346	13238841
Pex3	ENSMUSG00000019809	10	13243648	13272948
Adat2	ENSMUSG00000019808	10	13272700	13283182
Aig1	ENSMUSG00000019806	10	13366860	13588786
Hivep2	ENSMUSG00000015501	10	13686185	13871182
Gm8330	ENSMUSG00000091527	10	13686830	13727211
B230208H11Rik	ENSMUSG00000085233	10	12636446	12642898
U6	ENSMUSG00000064531	10	13608343	13608449
U1	ENSMUSG00000065096	10	12083208	12083371
U6	ENSMUSG00000088516	10	12513673	12513772
SNORA73	ENSMUSG00000065181	10	12088421	12088630
Gm6808	ENSMUSG00000090162	10	111526723	111527529
Gm15914	ENSMUSG00000089667	10	111538296	111538604
Nap1l1	ENSMUSG00000058799	10	110910248	110935198
Gm5176	ENSMUSG00000092020	10	110937795	110939019
Phlda1	ENSMUSG00000020205	10	110943342	110945705
Krr1	ENSMUSG00000063334	10	111409720	111425488
Glipr1	ENSMUSG00000056888	10	111422504	111439687
Glipr1l1	ENSMUSG00000020213	10	111497245	111515566
Glipr1l2	ENSMUSG00000020214	10	111520410	111545154
Caps2	ENSMUSG00000035694	10	111600677	111653611
Kcnc2	ENSMUSG00000035681	10	111708179	111903360
Atxn7l3b	ENSMUSG00000074748	10	112362494	112366082
4933440J02Rik	ENSMUSG00000087191	10	111023775	111031329
U1	ENSMUSG00000064707	10	112368480	112368639
SNORA48	ENSMUSG00000087819	10	110918549	110918692
Gm12125	ENSMUSG00000081571	11	35809556	35810291
Gm12126	ENSMUSG00000087245	11	35894166	35897356
Gm12127	ENSMUSG00000086375	11	36091543	36093489
Gm12128	ENSMUSG00000087388	11	37472491	37486668
Wwc1	ENSMUSG00000018849	11	35651902	35794029
Odz2	ENSMUSG00000049336	11	35820158	37049466
U6	ENSMUSG00000065173	11	36536384	36536489
Gm12129	ENSMUSG00000082587	11	38032571	38033717
Gm12130	ENSMUSG00000087296	11	38306832	38333515
AL808020.1	ENSMUSG00000093184	11	37850681	37850765
Gm12131	ENSMUSG00000083806	11	39540572	39541214
Gm12132	ENSMUSG00000085301	11	39821696	40151333
U6	ENSMUSG00000070249	11	38611673	38611779
U1	ENSMUSG00000088603	11	39644158	39644302
Hmgb1-ps1	ENSMUSG00000084129	11	40955265	40955898
Gm12139	ENSMUSG00000086475	11	41032339	41034598
Gm12140	ENSMUSG00000081112	11	41191580	41192123
Gm12141	ENSMUSG00000058809	11	41312178	41314411
Gm12142	ENSMUSG00000081847	11	41404624	41405536
A230004M16Rik	ENSMUSG00000087306	11	41523844	41786619
Gm12143	ENSMUSG00000084293	11	41602990	41603321
Gabrg2	ENSMUSG00000020436	11	41723697	41814359
Gabra1	ENSMUSG00000010803	11	41944441	41996432
Gabra6	ENSMUSG00000020428	11	42119939	42134574
Gabrb2	ENSMUSG00000007653	11	42233259	42446092
U1	ENSMUSG00000065916	11	40848470	40848625
7SK	ENSMUSG00000084627	11	42710997	42711308
Gm9972	ENSMUSG00000055456	11	42849248	42850780
Gm12145	ENSMUSG00000085951	11	42919642	42929796
Atp10b	ENSMUSG00000055415	11	42963379	43075787
Gm12146	ENSMUSG00000085533	11	43010926	43073286
Gm12144	ENSMUSG00000086170	11	43043065	43045766
Gm12147	ENSMUSG00000086791	11	43073293	43124590
Gm12148	ENSMUSG00000084889	11	43198984	43200685
Mir146	ENSMUSG00000065601	11	43187899	43187963
Pttg1	ENSMUSG00000020415	11	43233752	43239753
Gm12151	ENSMUSG00000084307	11	43276698	43276987
Slu7	ENSMUSG00000020409	11	43247246	43261483
C1qtnf2	ENSMUSG00000046491	11	43287778	43305027
Ccnjl	ENSMUSG00000044707	11	43342286	43400499
Gm12150	ENSMUSG00000085239	11	43393104	43394618
4933415A04Rik	ENSMUSG00000045877	11	43400542	43402550
Gm12149	ENSMUSG00000082614	11	43428619	43429831
Fabp6	ENSMUSG00000020405	11	43409551	43415042
Gm12152	ENSMUSG00000083662	11	43484303	43484986
Pwwp2a	ENSMUSG00000044950	11	43495500	43534993
Ttc1	ENSMUSG00000041278	11	43543014	43561510
Adra1b	ENSMUSG00000050541	11	43588108	43714712
Gm12153	ENSMUSG00000087172	11	43772591	43948489
Gm12154	ENSMUSG00000086738	11	44079065	44080711
Gm12155	ENSMUSG00000082790	11	44200617	44200776
Gm12157	ENSMUSG00000083521	11	44231451	44232198
Il12b	ENSMUSG00000004296	11	44213565	44227535
Ublcp1	ENSMUSG00000041231	11	44268073	44284000
AL669944.1	ENSMUSG00000092889	11	44282515	44282568
Hspa4	ENSMUSG00000020361	11	53073316	53113959
Zcchc10	ENSMUSG00000018239	11	53138181	53146803
Aff4	ENSMUSG00000049470	11	53164335	53235332
Leap2	ENSMUSG00000036216	11	53235683	53236672
Uqcrq	ENSMUSG00000044894	11	53241424	53244333
Gdf9	ENSMUSG00000018238	11	53244525	53251406
Gm10447	ENSMUSG00000072963	11	53268306	53270612
Shroom1	ENSMUSG00000018387	11	53270707	53281268
Gm9837	ENSMUSG00000049427	11	53283251	53283981
Sowaha	ENSMUSG00000044352	11	53290075	53293776
Gm9945	ENSMUSG00000054450	11	53293668	53294599
Sept8	ENSMUSG00000018398	11	53332759	53363067
Kif3a	ENSMUSG00000018395	11	53380881	53417746
Il4	ENSMUSG00000000869	11	53416484	53432171
Il13	ENSMUSG00000020383	11	53444826	53448204
Rad50	ENSMUSG00000020380	11	53463021	53520821
Il5	ENSMUSG00000036117	11	53534296	53538608
Irf1	ENSMUSG00000018899	11	53583516	53591876
Gm17334	ENSMUSG00000091191	11	53585783	53586689
Gm12216	ENSMUSG00000081769	11	53596920	53672758
Gm11006	ENSMUSG00000078860	11	53606266	53606378
Slc22a5	ENSMUSG00000018900	11	53678044	53705162
Slc22a21	ENSMUSG00000063652	11	53763467	53793834
Slc22a4	ENSMUSG00000020334	11	53796625	53841592
Pdlim4	ENSMUSG00000020388	11	53868430	53882516
P4ha2	ENSMUSG00000018906	11	53913597	53945167
Csf2	ENSMUSG00000018916	11	54060773	54063169
Il3	ENSMUSG00000018914	11	54078805	54080779
Acsl6	ENSMUSG00000020333	11	54117300	54178258
4930404A10Rik	ENSMUSG00000020332	11	54184154	54240292
Fnip1	ENSMUSG00000035992	11	54251701	54331737
Rapgef6	ENSMUSG00000037533	11	54336349	54512787
Cdc42se2	ENSMUSG00000052298	11	54530958	54601177
Lyrm7	ENSMUSG00000020268	11	54640368	54674418
Hint1	ENSMUSG00000020267	11	54679885	54684003
Gpx3	ENSMUSG00000018339	11	54715955	54723879
Tnip1	ENSMUSG00000020400	11	54724289	54776419
Anxa6	ENSMUSG00000018340	11	54792610	54846947
Ccdc69	ENSMUSG00000049588	11	54863233	54891633
Gm2a	ENSMUSG00000000594	11	54911617	54926531
Slc36a3	ENSMUSG00000049491	11	54938317	54965210
Slc36a2	ENSMUSG00000020264	11	54971972	54998579
Slc36a1	ENSMUSG00000020261	11	55017852	55049832
Gm11188	ENSMUSG00000082263	11	53158792	53159179
Gm12212	ENSMUSG00000085707	11	53275881	53277115
Rpl9-ps3	ENSMUSG00000085718	11	53314686	53315264
A430108G06Rik	ENSMUSG00000086851	11	53378190	53380815
Rps2-ps4	ENSMUSG00000084373	11	53459246	53459878
Gm12214	ENSMUSG00000086595	11	53537455	53538120
Gm12213	ENSMUSG00000083986	11	53547081	53547433
Gm12217	ENSMUSG00000082271	11	53715692	53717070
Gm12218	ENSMUSG00000082380	11	53716259	53716657
Gm12220	ENSMUSG00000081098	11	53742807	53742978
Gm12219	ENSMUSG00000080768	11	53780565	53781007
Gm12221	ENSMUSG00000036045	11	53972428	53973558
4933405E24Rik	ENSMUSG00000086209	11	53991274	54026787
Gm12222	ENSMUSG00000060068	11	54012932	54013194
Gm12223	ENSMUSG00000085585	11	54061102	54067997
Gm12224	ENSMUSG00000085888	11	54153871	54166981
Gm12226	ENSMUSG00000078151	11	54214594	54215469
Gm12225	ENSMUSG00000084212	11	54217642	54217939
Gm12227	ENSMUSG00000086039	11	54542179	54547825
Gm12229	ENSMUSG00000082503	11	54559859	54560326
Gm12228	ENSMUSG00000086789	11	54633421	54638469
Gm12230	ENSMUSG00000082180	11	54760937	54761390
Gm12231	ENSMUSG00000044751	11	54931603	54932297
Mup-ps22	ENSMUSG00000080738	11	54937197	54937439
Gm12233	ENSMUSG00000085531	11	54950546	54953695
4921508A21Rik	ENSMUSG00000084980	11	55005221	55011366
7SK	ENSMUSG00000084419	11	53514681	53514990
AL607091.1	ENSMUSG00000093341	11	54471999	54472075
U6	ENSMUSG00000088437	11	54271664	54271771
U1	ENSMUSG00000088231	11	54643213	54643382
U6	ENSMUSG00000064719	11	53203904	53204010
Gria1	ENSMUSG00000020524	11	56824889	57143746
Fam114a2	ENSMUSG00000020523	11	57296492	57332146
Mfap3	ENSMUSG00000020522	11	57332166	57347317
Galnt10	ENSMUSG00000020520	11	57458944	57601016
Sap30l	ENSMUSG00000020519	11	57615139	57623719
Hand1	ENSMUSG00000037335	11	57642207	57646320
Gm11003	ENSMUSG00000078855	11	57651266	57651591
Larp1	ENSMUSG00000037331	11	57822566	57875533
Cnot8	ENSMUSG00000020515	11	57917655	57932096
Gemin5	ENSMUSG00000037275	11	57933504	57982041
Mrpl22	ENSMUSG00000020514	11	57985163	57993067
Igtp	ENSMUSG00000078853	11	58013058	58021093
Irgm2	ENSMUSG00000069874	11	58028530	58036282
4930438A08Rik	ENSMUSG00000069873	11	58088301	58107791
Zfp692	ENSMUSG00000037243	11	58120571	58128129
Zfp672	ENSMUSG00000049755	11	58128616	58136848
Gm9900	ENSMUSG00000053218	11	58141223	58143841
Sh3bp5l	ENSMUSG00000013646	11	58144226	58161230
1700047K16Rik	ENSMUSG00000087347	11	58136490	58137941
Gm12241	ENSMUSG00000081749	11	56272851	56273576
Gm12242	ENSMUSG00000082476	11	57262609	57263346
Gm12243	ENSMUSG00000086028	11	57386014	57388097
4933424L21Rik	ENSMUSG00000085719	11	57437200	57462996
4933426K07Rik	ENSMUSG00000086933	11	57468917	57471328
2010001A14Rik	ENSMUSG00000087165	11	57609001	57614919
Gm12244	ENSMUSG00000084223	11	57694398	57694688
Gm12245	ENSMUSG00000083657	11	57762231	57762587
Gm12249	ENSMUSG00000086666	11	57783746	57786636
Gm12248	ENSMUSG00000086962	11	57877330	57886439
Gm12247	ENSMUSG00000081223	11	57910606	57911275
Gm12246	ENSMUSG00000087629	11	57939570	57942014
Gm12250	ENSMUSG00000082292	11	57997345	58003700
7SK	ENSMUSG00000089280	11	57782844	57783114
U6	ENSMUSG00000077155	11	57554802	57554904
n-R5s69	ENSMUSG00000065806	11	57577929	57578047
SNORA70	ENSMUSG00000088228	11	56296451	56296546
snoU13	ENSMUSG00000088382	11	58185676	58185773
2210415F13Rik	ENSMUSG00000013643	11	58192545	58204230
1810065E05Rik	ENSMUSG00000013653	11	58234613	58239526
Gm12253	ENSMUSG00000058287	11	58246061	58255124
4930504O13Rik	ENSMUSG00000052642	11	58259651	58266425
Olfr30	ENSMUSG00000043314	11	58268417	58269482
Olfr332	ENSMUSG00000050813	11	58303221	58304255
Olfr331	ENSMUSG00000058807	11	58315007	58323593
Olfr330	ENSMUSG00000050818	11	58342431	58348327
Olfr328	ENSMUSG00000057654	11	58364807	58368144
Olfr224	ENSMUSG00000059279	11	58379836	58382757
Olfr325	ENSMUSG00000060765	11	58394315	58395379
Olfr324	ENSMUSG00000056564	11	58410847	58411968
2210407C18Rik	ENSMUSG00000037145	11	58421706	58429577
Olfr323	ENSMUSG00000043880	11	58438575	58439546
Gm12252	ENSMUSG00000082181	11	58209799	58210017
Olfr333-ps1	ENSMUSG00000081287	11	58290854	58291659
Gm12254	ENSMUSG00000085342	11	58322293	58322763
Gm12255	ENSMUSG00000083501	11	58346396	58346605
Olfr329-ps	ENSMUSG00000064252	11	58355905	58358440
Gm12251	ENSMUSG00000084384	11	58206271	58207065
Gm20448	ENSMUSG00000092286	12	3752543	3762146
Gm10485	ENSMUSG00000073242	12	3859293	3862244
Gm6682	ENSMUSG00000091269	12	4789021	4789317
Gm17681	ENSMUSG00000069181	12	3343816	3357153
1700012B15Rik	ENSMUSG00000079179	12	3236611	3249999
Rab10	ENSMUSG00000020671	12	3247430	3309969
Kif3c	ENSMUSG00000020668	12	3365132	3406494
1110002L01Rik	ENSMUSG00000071456	12	3405308	3426644
Asxl2	ENSMUSG00000037486	12	3426857	3506852
Dtnb	ENSMUSG00000071454	12	3572381	3781796
Dnmt3a	ENSMUSG00000020661	12	3806007	3914443
Pomc	ENSMUSG00000020660	12	3954951	3960618
Efr3b	ENSMUSG00000020658	12	3962554	4038915
Dnajc27	ENSMUSG00000020657	12	4082612	4110602
Adcy3	ENSMUSG00000020654	12	4133103	4213525
Cenpo	ENSMUSG00000020652	12	4196004	4234294
2410017P09Rik	ENSMUSG00000073240	12	4234027	4236693
Ncoa1	ENSMUSG00000020647	12	4247363	4484060
Gm3625	ENSMUSG00000091619	12	4599632	4599733
Itsn2	ENSMUSG00000020640	12	4599814	4720756
Gm17541	ENSMUSG00000091732	12	4696208	4696732
4930417G10Rik	ENSMUSG00000079177	12	4720476	4745225
A830093I24Rik	ENSMUSG00000050545	12	4753022	4776073
Pfn4	ENSMUSG00000020639	12	4776101	4785072
0610009D07Rik	ENSMUSG00000037361	12	4824414	4834464
Fkbp1b	ENSMUSG00000020635	12	4839981	4848401
BC068281	ENSMUSG00000051721	12	4850109	4863731
Mfsd2b	ENSMUSG00000037336	12	4869246	4881165
Ubxn2a	ENSMUSG00000020634	12	4885838	4914511
Atad2b	ENSMUSG00000052812	12	4924210	5050853
Klhl29	ENSMUSG00000020627	12	5084278	5382488
7SK	ENSMUSG00000084597	12	4394482	4394767
AC160138.1	ENSMUSG00000092711	12	3448282	3448352
U6	ENSMUSG00000087939	12	4756558	4756662
5S_rRNA	ENSMUSG00000088207	12	4347647	4347760
CR974568.1	ENSMUSG00000077830	12	3699178	3699240
U6	ENSMUSG00000075833	12	4765353	4765459
AC159324.1	ENSMUSG00000093310	12	3890652	3890731
U6	ENSMUSG00000087780	12	5006072	5006174
Gm15691	ENSMUSG00000085472	12	30744522	30746978
Rnaseh1	ENSMUSG00000020630	12	29334467	29344456
Adi1	ENSMUSG00000020629	12	29360096	29367040
Ttc15	ENSMUSG00000020628	12	29375494	29435331
Tssc1	ENSMUSG00000036613	12	29436693	29552356
Myt1l	ENSMUSG00000061911	12	30213249	30608074
Pxdn	ENSMUSG00000020674	12	30622901	30702523
Tpo	ENSMUSG00000020673	12	30739524	30817489
Sntg2	ENSMUSG00000020672	12	30859347	31058240
Tmem18	ENSMUSG00000043061	12	31269308	31276078
AC159204.1	ENSMUSG00000092653	12	31242779	31242999
AC154485.1	ENSMUSG00000088872	12	31142833	31142936
5S_rRNA	ENSMUSG00000089583	12	29720045	29720159
AC160932.1	ENSMUSG00000093150	12	31519797	31519867
Fam150b	ENSMUSG00000054204	12	31569187	31578719
Acp1	ENSMUSG00000044573	12	31578191	31596477
Sh3yl1	ENSMUSG00000020669	12	31596533	31645027
Gm9359	ENSMUSG00000091040	12	32103713	32104933
Gm11053	ENSMUSG00000079147	12	31996552	32009623
Dld	ENSMUSG00000020664	12	32016429	32036302
Slc26a3	ENSMUSG00000001225	12	32075736	32158782
Fam110c	ENSMUSG00000036136	12	31758833	31764802
6030469F06Rik	ENSMUSG00000073142	12	31856066	31870766
Lamb1	ENSMUSG00000002900	12	31950099	32014509
U7	ENSMUSG00000089620	12	32065595	32065657
SNORA17	ENSMUSG00000077292	12	31741940	31742072
SNORA65	ENSMUSG00000065200	12	31943798	31943927
3110056K07Rik	ENSMUSG00000085622	12	72092602	72116819
4930474H06Rik	ENSMUSG00000087109	12	72418608	72422647
Tmx1	ENSMUSG00000021072	12	71554082	71569027
Frmd6	ENSMUSG00000048285	12	71926501	72003219
Actr10	ENSMUSG00000021076	12	72038844	72065705
Psma3	ENSMUSG00000060073	12	72075608	72097334
Arid4a	ENSMUSG00000048118	12	72116977	72199579
Dact1	ENSMUSG00000044548	12	72410871	72421094
Daam1	ENSMUSG00000034574	12	72932065	73093354
Tomm20l	ENSMUSG00000021078	12	72212415	72224209
Timm9	ENSMUSG00000021079	12	72224160	72237662
2700049A03Rik	ENSMUSG00000034601	12	72237835	72344290
Gpr135	ENSMUSG00000043398	12	73170605	73171978
2810055F11Rik	ENSMUSG00000019718	12	73174415	73186426
Jkamp	ENSMUSG00000005078	12	73186576	73202448
4930403N07Rik	ENSMUSG00000021086	12	73202279	73286016
Rtn1	ENSMUSG00000021087	12	73312739	73510041
CR974486.1	ENSMUSG00000077094	12	73231197	73231305
7SK	ENSMUSG00000084463	12	72825639	72825941
U6	ENSMUSG00000088068	12	71774633	71774733
7SK	ENSMUSG00000088686	12	72036315	72036624
4930534B04Rik	ENSMUSG00000061533	12	92236932	92622849
Tshr	ENSMUSG00000020963	12	92639433	92778949
Gtf2a1	ENSMUSG00000020962	12	92794356	92828927
Ston2	ENSMUSG00000020961	12	92876982	93026827
Sel1l	ENSMUSG00000020964	12	93044483	93087597
5430427M07Rik	ENSMUSG00000085004	12	92288809	92318347
Gm8378	ENSMUSG00000090722	12	92913252	92924553
Gm16876	ENSMUSG00000086689	12	92923105	92932030
Rpl31-ps1	ENSMUSG00000066389	12	93129336	93129713
Gm2228	ENSMUSG00000060323	12	93399333	93399770
4930544I03Rik	ENSMUSG00000092100	12	91991648	92208208
7SK	ENSMUSG00000084566	12	92219665	92219987
n-R5s65	ENSMUSG00000064548	12	92040059	92040175
SNORA17	ENSMUSG00000089439	12	92053637	92053765
AC154375.1	ENSMUSG00000077096	12	93030050	93030114
SNORA79	ENSMUSG00000080365	12	92811870	92812012
Kif26a	ENSMUSG00000021294	12	113384446	113419957
A730018C14Rik	ENSMUSG00000047828	12	113652126	113661423
A530016L24Rik	ENSMUSG00000043122	12	113727659	113738138
Tmem179	ENSMUSG00000054013	12	113738395	113749371
Inf2	ENSMUSG00000037679	12	113826995	113853767
Adssl1	ENSMUSG00000011148	12	113858258	113879565
Siva1	ENSMUSG00000064326	12	113883039	113887363
Akt1	ENSMUSG00000001729	12	113892032	113913095
Zbtb42	ENSMUSG00000037638	12	113917039	113920958
AW555464	ENSMUSG00000072825	12	113960385	113984802
Pld4	ENSMUSG00000052160	12	113998866	114007197
Ahnak2	ENSMUSG00000072812	12	114010405	114040868
BC022687	ENSMUSG00000037594	12	114047186	114054456
Cdca4	ENSMUSG00000047832	12	114058448	114067600
Gpr132	ENSMUSG00000021298	12	114089087	114099127
Gm17723	ENSMUSG00000091222	12	114131774	114133577
Jag2	ENSMUSG00000002799	12	114146801	114167706
Nudt14	ENSMUSG00000002804	12	114172944	114180329
Brf1	ENSMUSG00000011158	12	114198073	114238832
Btbd6	ENSMUSG00000002803	12	114214693	114217141
Pacs2	ENSMUSG00000021143	12	114252719	114312612
Tex22	ENSMUSG00000012211	12	114312713	114327128
Mta1	ENSMUSG00000021144	12	114336489	114375417
Crip2	ENSMUSG00000006356	12	114378447	114383715
Crip1	ENSMUSG00000006360	12	114390223	114392088
4930427A07Rik	ENSMUSG00000037466	12	114394632	114413736
Tmem121	ENSMUSG00000049036	12	114424114	114427731
Ighe	ENSMUSG00000087642	12	114509391	114511457
Ighg2c	ENSMUSG00000076612	12	114523536	114527141
Gm17421	ENSMUSG00000090726	12	114606713	114607927
Gm11029	ENSMUSG00000078993	12	114655095	114657149
Adam6b	ENSMUSG00000051804	12	114727756	114730229
Adam6a	ENSMUSG00000043945	12	114782119	114784625
Gm17274	ENSMUSG00000090980	12	114184574	114188723
Ighe	ENSMUSG00000076611	12	114509484	114511358
Ighg2b	ENSMUSG00000076613	12	114544600	114546144
Ighg1	ENSMUSG00000076614	12	114567187	114568734
Ighg3	ENSMUSG00000076615	12	114597876	114599443
Ighm	ENSMUSG00000076617	12	114659078	114660941
Ighj4	ENSMUSG00000076618	12	114666725	114666778
Ighj3	ENSMUSG00000076619	12	114667296	114667343
Ighj2	ENSMUSG00000076620	12	114667725	114667778
Ighj1	ENSMUSG00000076621	12	114667992	114668044
Ighd4-1	ENSMUSG00000076622	12	114668739	114668749
Ighd3-2	ENSMUSG00000076623	12	114686425	114686440
Ighd5-6	ENSMUSG00000091062	12	114687799	114687810
Ighd2-8	ENSMUSG00000076624	12	114689062	114689078
Ighd5-5	ENSMUSG00000091857	12	114693153	114693162
Ighd2-7	ENSMUSG00000076625	12	114694931	114694947
Ighd5-8	ENSMUSG00000091051	12	114698075	114698103
Ighd5-4	ENSMUSG00000091630	12	114698312	114698321
Ighd2-6	ENSMUSG00000076626	12	114699580	114699596
Ighd5-7	ENSMUSG00000092160	12	114702735	114702763
Ighd5-3	ENSMUSG00000091334	12	114702972	114702981
Ighd2-5	ENSMUSG00000076627	12	114704238	114704254
Ighd5-2	ENSMUSG00000091394	12	114707637	114707646
Ighd2-4	ENSMUSG00000076628	12	114708905	114708921
Ighd6-2	ENSMUSG00000091704	12	114713086	114713114
Ighd2-3	ENSMUSG00000076629	12	114713611	114713627
Ighd6-1	ENSMUSG00000090563	12	114718354	114718382
Ighd1-1	ENSMUSG00000076630	12	114720381	114720403
Ighd3-1	ENSMUSG00000076631	12	114763524	114763540
Ighd5-1	ENSMUSG00000091517	12	114765011	114765020
Gm16968	ENSMUSG00000076632	12	114766243	114766265
Ighv2-1	ENSMUSG00000091606	12	114812453	114812892
Ighv5-2	ENSMUSG00000076633	12	114816715	114817201
Ighv2-2	ENSMUSG00000076634	12	114826478	114826911
Ighv5-4	ENSMUSG00000076635	12	114835657	114836116
Ighv2-3	ENSMUSG00000076636	12	114849395	114849828
Ighv5-6	ENSMUSG00000076637	12	114863717	114864167
Ighv2-4	ENSMUSG00000076638	12	114891502	114891935
Gm17309	ENSMUSG00000090395	12	114893178	114893455
Ighv5-9	ENSMUSG00000076639	12	114899980	114900439
Ighv2-5	ENSMUSG00000076640	12	114923693	114924126
Ighv5-12	ENSMUSG00000076641	12	114940335	114940789
Ighv2-6	ENSMUSG00000076642	12	114954886	114955314
Ighv5-9-1	ENSMUSG00000076643	12	114974322	114974781
Ighv2-9-1	ENSMUSG00000076645	12	115008061	115008494
Ighv2-6-8	ENSMUSG00000076646	12	115034354	115034778
Ighv2-7	ENSMUSG00000076647	12	115045525	115045958
Ighv5-15	ENSMUSG00000076648	12	115064857	115065332
Ighv5-16	ENSMUSG00000076649	12	115076737	115077194
Ighv5-17	ENSMUSG00000076650	12	115097360	115097827
Ighv2-9	ENSMUSG00000076651	12	115117307	115117740
Ighv7-1	ENSMUSG00000076652	12	115134625	115135157
Ighv7-2	ENSMUSG00000076653	12	115150236	115150694
Ighv14-1	ENSMUSG00000076654	12	115170164	115170593
Ighv4-1	ENSMUSG00000076655	12	115186493	115186943
Ighv3-1	ENSMUSG00000076669	12	115202599	115202894
Ighv11-1	ENSMUSG00000076657	12	115220090	115220552
Ighv14-2	ENSMUSG00000076658	12	115232680	115233109
Ighv3-2	ENSMUSG00000078992	12	115272144	115272302
Ighv11-2	ENSMUSG00000076659	12	115286452	115286915
Ighv14-3	ENSMUSG00000076660	12	115298056	115298484
Ighv16-1	ENSMUSG00000076661	12	115307039	115307337
Ighv9-1	ENSMUSG00000076662	12	115332139	115332432
Ighv9-2	ENSMUSG00000076663	12	115347212	115347641
Ighv9-3	ENSMUSG00000076664	12	115378903	115379333
AC073553.3	ENSMUSG00000092748	12	114663361	114663438
AC073553.2	ENSMUSG00000092737	12	114662960	114663029
U6	ENSMUSG00000087842	12	114452360	114452463
AC073553.1	ENSMUSG00000092683	12	114662856	114662933
Ighv7-3	ENSMUSG00000076665	12	115391395	115391855
Ighv14-4	ENSMUSG00000076666	12	115414655	115415073
Ighv3-3	ENSMUSG00000076667	12	115434650	115434945
Ighv7-4	ENSMUSG00000076668	12	115460999	115461465
Ighv3-5	ENSMUSG00000076670	12	115500483	115501161
Ighv13-1	ENSMUSG00000076671	12	115505818	115506117
Ighv3-6	ENSMUSG00000076672	12	115526363	115526793
Ighv9-4	ENSMUSG00000076673	12	115538172	115538465
Ighv3-8	ENSMUSG00000076674	12	115560585	115561012
Ighv13-2	ENSMUSG00000087582	12	115595972	115596429
Ighv12-3	ENSMUSG00000076676	12	115604737	115605165
Ighv6-3	ENSMUSG00000076677	12	115629923	115630380
Ighv6-6	ENSMUSG00000076680	12	115672999	115673455
Ighv1-2	ENSMUSG00000078991	12	115707316	115707438
Ighv10-1	ENSMUSG00000076683	12	115717216	115717662
Ighv1-4	ENSMUSG00000076684	12	115725347	115725780
Ighv1-5	ENSMUSG00000076685	12	115751541	115751834
Ighv10-3	ENSMUSG00000076686	12	115761652	115762098
Ighv1-7	ENSMUSG00000076687	12	115776706	115776999
Ighv15-2	ENSMUSG00000076688	12	115802789	115803223
Ighv1-9	ENSMUSG00000076689	12	115821780	115822213
Ighv1-12	ENSMUSG00000076691	12	115854061	115854354
Gm17686	ENSMUSG00000090765	12	115868891	115869184
Ighv1-14	ENSMUSG00000076692	12	115884783	115885076
Ighv1-15	ENSMUSG00000076693	12	115895567	115895988
Ighv1-18	ENSMUSG00000076695	12	115920885	115921276
Ighv1-19	ENSMUSG00000076696	12	115946859	115947292
Ighv1-20	ENSMUSG00000076697	12	115961983	115962416
Ighv1-22	ENSMUSG00000076698	12	115984484	115984917
Ighv1-23	ENSMUSG00000076699	12	116002664	116003085
Ighv1-24	ENSMUSG00000076700	12	116011139	116011432
Ighv1-26	ENSMUSG00000076701	12	116026583	116027016
Ighv1-30	ENSMUSG00000076694	12	116055310	116055601
Ighv1-31	ENSMUSG00000076702	12	116067475	116067768
Ighv1-33	ENSMUSG00000078971	12	116081862	116082154
Ighv1-34	ENSMUSG00000076703	12	116089401	116089834
Ighv1-36	ENSMUSG00000076704	12	116118099	116118532
Ighv1-37	ENSMUSG00000076705	12	116134449	116134882
Ighv1-39	ENSMUSG00000076706	12	116152810	116153243
Ighv1-42	ENSMUSG00000076707	12	116175324	116175617
Ighv1-43	ENSMUSG00000076708	12	116184161	116184454
Ighv1-47	ENSMUSG00000076709	12	116229319	116229612
Ighv1-49	ENSMUSG00000076710	12	116293434	116293727
Ighv8-5	ENSMUSG00000076711	12	116305787	116306207
Ighv1-50	ENSMUSG00000076712	12	116357959	116358391
Ighv1-52	ENSMUSG00000076713	12	116383698	116384130
Ighv1-53	ENSMUSG00000076714	12	116396614	116397046
Ighv8-6	ENSMUSG00000076715	12	116403988	116404288
Ighv1-54	ENSMUSG00000076716	12	116431886	116432319
Ighv1-55	ENSMUSG00000076717	12	116446306	116446738
Ighv1-56	ENSMUSG00000076718	12	116481013	116481306
Ighv8-8	ENSMUSG00000076719	12	116532289	116532709
Ighv1-58	ENSMUSG00000076720	12	116550377	116550807
Ighv1-59	ENSMUSG00000076721	12	116573293	116573725
Ighv1-61	ENSMUSG00000076722	12	116597351	116597783
Ighv1-62-1	ENSMUSG00000090959	12	116625110	116625199
Ighv1-62-2	ENSMUSG00000091241	12	116684620	116684921
Ighv1-62-3	ENSMUSG00000076723	12	116699210	116699642
Ighv8-9	ENSMUSG00000076724	12	116706543	116706843
Ighv1-63	ENSMUSG00000076725	12	116733836	116734269
Ighv1-64	ENSMUSG00000076726	12	116745756	116746188
Ighv8-11	ENSMUSG00000076727	12	116805376	116805796
Ighv1-66	ENSMUSG00000076728	12	116831321	116831754
Ighv1-67	ENSMUSG00000076729	12	116842151	116842444
Ighv1-69	ENSMUSG00000076730	12	116861372	116861806
Ighv8-12	ENSMUSG00000076731	12	116886172	116886572
Ighv1-71	ENSMUSG00000091301	12	116980416	116980717
Ighv1-72	ENSMUSG00000076732	12	116996195	116996627
Ighv8-13	ENSMUSG00000076733	12	117003544	117003846
Ighv1-73	ENSMUSG00000057610	12	117028913	117029095
Gm16710	ENSMUSG00000076734	12	117040859	117041291
Ighv8-14	ENSMUSG00000091087	12	117046672	117046791
Ighv1-75	ENSMUSG00000076735	12	117072161	117072607
Zfp386	ENSMUSG00000042063	12	117280562	117299060
Vipr2	ENSMUSG00000011171	12	117316196	117384734
Wdr60	ENSMUSG00000042050	12	117445523	117501498
Gm11027	ENSMUSG00000078984	12	117513859	117514085
Esyt2	ENSMUSG00000021171	12	117519695	117611569
D430020J02Rik	ENSMUSG00000091262	12	117643573	117664338
Ncapg2	ENSMUSG00000042029	12	117643875	117702004
Ptprn2	ENSMUSG00000056553	12	117724193	118516640
RP24-386J17.2	ENSMUSG00000093765	12	117341242	117377121
Gm17626	ENSMUSG00000091100	12	117286040	117290093
Ighv1-76	ENSMUSG00000091843	12	117086092	117086385
Ighv1-77	ENSMUSG00000092156	12	117100078	117100371
Ighv1-78	ENSMUSG00000091338	12	117106984	117107277
Ighv1-80	ENSMUSG00000076738	12	117150555	117150987
Ighv1-81	ENSMUSG00000076739	12	117158490	117158923
Ighv1-82	ENSMUSG00000076740	12	117190749	117191042
Ighv1-83	ENSMUSG00000076741	12	117202028	117202318
Ighv1-84	ENSMUSG00000076742	12	117218913	117219345
Ighv1-85	ENSMUSG00000076743	12	117238239	117238672
U6	ENSMUSG00000065685	12	117411786	117411892
U6	ENSMUSG00000084629	12	117715369	117715472
Mir153	ENSMUSG00000065538	12	118489290	118489358
Rapgef5	ENSMUSG00000041992	12	118754952	118995451
5S_rRNA	ENSMUSG00000089482	12	118812815	118812920
Cdca7l	ENSMUSG00000021175	12	119042762	119117179
Dnahc11	ENSMUSG00000018581	12	119116455	119437516
RP23-67O10.2	ENSMUSG00000093544	12	119072480	119072824
U7	ENSMUSG00000088593	12	119163110	119163175
Sp4	ENSMUSG00000025323	12	119473406	119539913
Sp8	ENSMUSG00000048562	12	120084802	120091051
Abcb5	ENSMUSG00000072791	12	120106297	120204894
Itgb8	ENSMUSG00000025321	12	120396495	120477275
Macc1	ENSMUSG00000041886	12	120681883	120705407
Gm6768	ENSMUSG00000021908	12	120499451	120501328
7SK	ENSMUSG00000088797	12	119992027	119992225
U6	ENSMUSG00000065348	12	119743401	119743507
B3galnt2	ENSMUSG00000039242	13	14046941	14091335
Tbce	ENSMUSG00000039233	13	14090216	14131905
Ggps1	ENSMUSG00000021302	13	14144637	14155668
Arid4b	ENSMUSG00000039219	13	14155499	14291870
Hecw1	ENSMUSG00000021301	13	14318705	14615493
Mrpl32	ENSMUSG00000015672	13	14702568	14705304
Psma2	ENSMUSG00000015671	13	14705521	14719674
AW209491	ENSMUSG00000039182	13	14722525	14730469
Gli3	ENSMUSG00000021318	13	15555068	15821859
n-R5s52	ENSMUSG00000077802	13	14211010	14211122
U6	ENSMUSG00000089624	13	14720886	14720998
U6	ENSMUSG00000064653	13	14179706	14179812
U7	ENSMUSG00000089031	13	15226457	15226515
4931414P19Rik	ENSMUSG00000022179	14	55202500	55224745
Rem2	ENSMUSG00000022176	14	55094937	55099271
Gm11067	ENSMUSG00000079234	14	55056348	55056679
Lrp10	ENSMUSG00000022175	14	55083001	55090334
Cpne6	ENSMUSG00000022212	14	56129282	56136268
Jph4	ENSMUSG00000022208	14	55725667	55735772
Traj27	ENSMUSG00000076902	14	54811978	54812036
Traj32	ENSMUSG00000076897	14	54805776	54805841
Traj33	ENSMUSG00000076896	14	54805033	54805089
Traj34	ENSMUSG00000076895	14	54804374	54804431
Irf9	ENSMUSG00000002325	14	56222408	56228867
Rec8	ENSMUSG00000002324	14	56236874	56244232
Haus4	ENSMUSG00000022177	14	55160622	55173198
Jub	ENSMUSG00000022178	14	55186309	55196253
Gm20521	ENSMUSG00000092232	14	55502278	55516974
Pabpn1	ENSMUSG00000022194	14	55511337	55517006
Slc22a17	ENSMUSG00000022199	14	55525564	55531969
Efs	ENSMUSG00000022203	14	55535380	55545625
Il25	ENSMUSG00000040770	14	55551608	55554671
Cmtm5	ENSMUSG00000040759	14	55555307	55558093
Myh6	ENSMUSG00000040752	14	55560758	55585764
Myh7	ENSMUSG00000053093	14	55589525	55613471
Gm17428	ENSMUSG00000090889	14	55595770	55595862
Ngdn	ENSMUSG00000022204	14	55634291	55642972
Zfhx2	ENSMUSG00000040721	14	55679099	55711161
Thtpa	ENSMUSG00000045691	14	55713672	55717823
Ap1g2	ENSMUSG00000040701	14	55717415	55725430
Psmb5	ENSMUSG00000022193	14	55232644	55236851
Psmb11	ENSMUSG00000072423	14	55244147	55248393
Cdh24	ENSMUSG00000059674	14	55250829	55260201
CT009512.1	ENSMUSG00000092443	14	55251166	55251618
Gm17606	ENSMUSG00000091306	14	55259789	55262854
Acin1	ENSMUSG00000022185	14	55260998	55305768
Dhrs2	ENSMUSG00000022209	14	55840844	55860272
Gm8894	ENSMUSG00000060680	14	56039106	56039561
[truncated: 672 more rows]

## Sheet: wk14IgG3-Prn
Gene Name	Ensembl Gene ID	Chromosome	Start	End
Sulf1	ENSMUSG00000016918	1	12708626	12850452
Slco5a1	ENSMUSG00000025938	1	12856630	12981258
Prdm14	ENSMUSG00000042414	1	13103538	13117244
Ncoa2	ENSMUSG00000005886	1	13129186	13364164
Tram1	ENSMUSG00000025935	1	13554783	13579945
Lactb2	ENSMUSG00000025937	1	13614926	13650627
Xkr9	ENSMUSG00000067813	1	13658852	13691804
Eya1	ENSMUSG00000025932	1	14159035	14300281
Gm17644	ENSMUSG00000066918	1	12657644	12663171
7SK	ENSMUSG00000089358	1	13922459	13922766
U6	ENSMUSG00000087782	1	13324579	13324690
SNORA17	ENSMUSG00000077368	1	13764415	13764545
AC156988.1	ENSMUSG00000093057	1	14172659	14172758
Hs6st1	ENSMUSG00000045216	1	36125245	36163291
Uggt1	ENSMUSG00000037470	1	36198375	36301150
Neurl3	ENSMUSG00000047180	1	36321447	36330270
Arid5a	ENSMUSG00000037447	1	36364578	36380874
4632411B12Rik	ENSMUSG00000010453	1	36392575	36426026
Lman2l	ENSMUSG00000001143	1	36478910	36502116
Cnnm4	ENSMUSG00000037408	1	36528442	36565621
Cnnm3	ENSMUSG00000001138	1	36568712	36585082
Ankrd23	ENSMUSG00000067653	1	36587379	36592584
Ankrd39	ENSMUSG00000079610	1	36595018	36604046
Sema4c	ENSMUSG00000026121	1	36605487	36615194
Fam178b	ENSMUSG00000046337	1	36619539	36740028
Cox5b	ENSMUSG00000061518	1	36748332	36750230
Actr1b	ENSMUSG00000037351	1	36756047	36771267
Zap70	ENSMUSG00000026117	1	36818695	36839663
Tmem131	ENSMUSG00000026116	1	36849036	36996372
Fer1l5	ENSMUSG00000037432	1	36473733	36478955
D430040D24Rik	ENSMUSG00000087589	1	36615204	36622458
Gm6428	ENSMUSG00000089906	1	36658647	36658991
SNORA17	ENSMUSG00000077231	1	35235801	35235929
AC084389.1	ENSMUSG00000077939	1	36720810	36720884
U6	ENSMUSG00000064601	1	35818447	35818551
Dars	ENSMUSG00000026356	1	130260285	130313993
Cxcr4	ENSMUSG00000045382	1	130484776	130488870
Thsd7b	ENSMUSG00000042581	1	131169879	132115855
Gm17699	ENSMUSG00000091877	1	130667176	130670998
Gm15790	ENSMUSG00000089648	1	131693185	131694435
Gm10191	ENSMUSG00000066956	1	131697964	131698341
Gm16081	ENSMUSG00000086633	1	132166527	132177835
SNORA70	ENSMUSG00000088196	1	130386617	130386750
U6	ENSMUSG00000064737	1	130782486	130782596
U6	ENSMUSG00000088432	1	130411692	130411796
Dnm3	ENSMUSG00000040265	1	163912584	164408165
Gm10176	ENSMUSG00000066752	1	164407811	164410074
Mettl13	ENSMUSG00000026694	1	164462258	164478682
Vamp4	ENSMUSG00000026696	1	164500646	164529215
Gm5705	ENSMUSG00000091743	1	164558488	164559114
Myoc	ENSMUSG00000026697	1	164569281	164579824
7420461P10Rik	ENSMUSG00000091060	1	164577334	164588304
Prrc2c	ENSMUSG00000040225	1	164603533	164670681
Fmo4	ENSMUSG00000026692	1	164724014	164744103
Fmo1	ENSMUSG00000040181	1	164759692	164796679
Fmo2	ENSMUSG00000040170	1	164804448	164828857
Fmo3	ENSMUSG00000026691	1	164883933	164914659
4921528O07Rik	ENSMUSG00000071890	1	164954433	165015801
Prrx1	ENSMUSG00000026586	1	165175247	165243841
Gorab	ENSMUSG00000040124	1	165315040	165333772
Mettl11b	ENSMUSG00000040113	1	165632388	165655363
Kifap3	ENSMUSG00000026585	1	165709714	165847240
Scyl3	ENSMUSG00000026584	1	165859231	165885257
BC055324	ENSMUSG00000041406	1	165876124	165924927
2810422O20Rik	ENSMUSG00000041396	1	165925020	165927374
Sele	ENSMUSG00000026582	1	165978365	165987808
Sell	ENSMUSG00000026581	1	165992207	166010916
Selp	ENSMUSG00000026580	1	166045395	166080157
Gm17698	ENSMUSG00000090335	1	165231921	165233751
Dnm3os	ENSMUSG00000078190	1	164147754	164155681
Gm16101	ENSMUSG00000089933	1	164246223	164246652
Gm20471	ENSMUSG00000092188	1	165210487	165217176
Gm2343	ENSMUSG00000089700	1	165659700	165660741
Mir214	ENSMUSG00000065516	1	164153499	164153608
AC157798.1	ENSMUSG00000093181	1	164080498	164080693
U6atac	ENSMUSG00000088951	1	165332414	165332521
Mir199a-2	ENSMUSG00000070126	1	164147945	164148054
SNORA17	ENSMUSG00000077608	1	164984949	164985082
SNORA40	ENSMUSG00000089174	1	165048358	165048479
Gm13440	ENSMUSG00000081591	2	36764615	36765110
Olfr359-ps1	ENSMUSG00000081737	2	36874779	36875722
Gm13439	ENSMUSG00000081174	2	36891544	36891952
Gm13437	ENSMUSG00000083431	2	36929542	36937975
Gm13434	ENSMUSG00000086667	2	36943808	36944684
Olfr363-ps	ENSMUSG00000068948	2	36961777	36962030
Gm13435	ENSMUSG00000083815	2	37062571	37063593
Olfr367-ps	ENSMUSG00000049094	2	37122471	37126907
Gm13543	ENSMUSG00000083745	2	37527728	37528523
Gm13556	ENSMUSG00000087294	2	38141775	38142811
Gm13584	ENSMUSG00000087539	2	38215100	38219500
Gm13589	ENSMUSG00000085950	2	38279522	38311371
Gm13588	ENSMUSG00000084124	2	38345624	38345758
Gm13586	ENSMUSG00000082931	2	38478321	38478784
Gpr144	ENSMUSG00000083722	2	38526678	38543171
Gm13587	ENSMUSG00000087062	2	38528057	38532072
4933433P16Rik	ENSMUSG00000087164	2	38568196	38576158
Gm13591	ENSMUSG00000082508	2	38633256	38633861
Gm13507	ENSMUSG00000085201	2	38678777	38707890
Olfr352	ENSMUSG00000053146	2	36725088	36726035
Olfr353	ENSMUSG00000075382	2	36745431	36746366
Olfr354	ENSMUSG00000055088	2	36762431	36763514
Olfr355	ENSMUSG00000075380	2	36782700	36783632
Olfr356	ENSMUSG00000070943	2	36792641	36793588
Olfr357	ENSMUSG00000055838	2	36852247	36853338
Olfr358	ENSMUSG00000075379	2	36860109	36861167
Olfr360	ENSMUSG00000083361	2	36921266	36924780
Olfr361	ENSMUSG00000075378	2	36940298	36941266
Olfr362	ENSMUSG00000075377	2	36960215	36961168
Olfr364-ps1	ENSMUSG00000078198	2	37001734	37002657
Olfr365	ENSMUSG00000059429	2	37056763	37057701
Olfr366	ENSMUSG00000068947	2	37075011	37075940
Olfr368	ENSMUSG00000049018	2	37187269	37188253
Pdcl	ENSMUSG00000009030	2	37205594	37214852
Rc3h2	ENSMUSG00000075376	2	37225589	37278423
Zbtb6	ENSMUSG00000066798	2	37281020	37298691
Zbtb26	ENSMUSG00000050714	2	37287688	37298641
Rabgap1	ENSMUSG00000035437	2	37298799	37421974
Strbp	ENSMUSG00000026915	2	37338748	37559379
Gpr21	ENSMUSG00000053164	2	37371852	37376123
Crb2	ENSMUSG00000035403	2	37631769	37654623
Dennd1a	ENSMUSG00000035392	2	37654510	38142910
Lhx2	ENSMUSG00000000247	2	38194801	38225253
Nek6	ENSMUSG00000026749	2	38367163	38443561
Psmb7	ENSMUSG00000026750	2	38443556	38499607
Nr5a1	ENSMUSG00000026751	2	38548176	38570062
Nr6a1	ENSMUSG00000063972	2	38578890	38783208
U6	ENSMUSG00000064468	2	38335858	38335965
Mir5128	ENSMUSG00000092958	2	37543721	37543804
U6	ENSMUSG00000064626	2	37137571	37137677
Mir181b-2	ENSMUSG00000065578	2	38709350	38709438
Snord90	ENSMUSG00000077756	2	37255567	37255677
AL844842.1	ENSMUSG00000092689	2	38492538	38492663
Mir181a-2	ENSMUSG00000065423	2	38708255	38708330
Ttc21b	ENSMUSG00000034848	2	66022384	66094674
Scn1a	ENSMUSG00000064329	2	66108838	66278897
Scn9a	ENSMUSG00000075316	2	66318137	66473009
Scn7a	ENSMUSG00000034810	2	66511482	66622971
Xirp2	ENSMUSG00000027022	2	67284059	67364671
F830016D02Rik	ENSMUSG00000067582	2	67269281	67271973
B3galt1	ENSMUSG00000034780	2	67942728	67960746
Stk39	ENSMUSG00000027030	2	68048502	68310325
Gm13630	ENSMUSG00000085386	2	66247551	66259645
Gm13629	ENSMUSG00000087301	2	66278937	66384083
Rpl35-ps1	ENSMUSG00000080855	2	66285093	66285464
Gm13627	ENSMUSG00000081307	2	66367471	66368803
Gm13600	ENSMUSG00000081973	2	66701319	66702832
Gm13602	ENSMUSG00000082218	2	66780615	66781107
Gm13598	ENSMUSG00000086908	2	66995703	67032792
Gm1322	ENSMUSG00000075314	2	67011891	67023007
Gm13599	ENSMUSG00000087043	2	67147716	67234548
Gm13601	ENSMUSG00000087467	2	67329101	67354582
Gm13604	ENSMUSG00000083910	2	67545347	67545828
Gm13603	ENSMUSG00000081299	2	67604034	67604116
Gm13607	ENSMUSG00000081257	2	67919848	67920386
Gm13606	ENSMUSG00000081899	2	67973721	67974669
SNORA17	ENSMUSG00000088043	2	67258088	67258219
7SK	ENSMUSG00000088994	2	66440572	66440855
Srxn1	ENSMUSG00000032802	2	151931252	151937112
Tcf15	ENSMUSG00000068079	2	151969297	151974833
Csnk2a1	ENSMUSG00000074698	2	152052575	152107588
Tbc1d20	ENSMUSG00000027465	2	152119564	152139732
Rbck1	ENSMUSG00000027466	2	152142070	152158389
Trib3	ENSMUSG00000032715	2	152163158	152169768
Nrsn2	ENSMUSG00000059361	2	152194491	152202374
Sox12	ENSMUSG00000051817	2	152219347	152223782
Zcchc3	ENSMUSG00000074682	2	152237692	152240780
6820408C15Rik	ENSMUSG00000032680	2	152241323	152270066
Defb23	ENSMUSG00000074681	2	152284791	152290356
Defb20	ENSMUSG00000049560	2	152302799	152305670
Defb22	ENSMUSG00000027468	2	152311399	152315874
Defb26	ENSMUSG00000074680	2	152333534	152337428
Defb28	ENSMUSG00000074679	2	152343991	152347183
Defb29	ENSMUSG00000044249	2	152364450	152365834
Gm17416	ENSMUSG00000090485	2	152395074	152395274
Defb21	ENSMUSG00000056544	2	152398480	152400680
Defb19	ENSMUSG00000050645	2	152401822	152406048
Defb45	ENSMUSG00000062124	2	152418927	152425135
Defb36	ENSMUSG00000044863	2	152430063	152438465
Defb25	ENSMUSG00000074678	2	152448092	152448789
Rem1	ENSMUSG00000000359	2	152452687	152460934
H13	ENSMUSG00000019188	2	152495197	152534406
Mcts2	ENSMUSG00000042814	2	152512884	152513676
Id1	ENSMUSG00000042745	2	152561987	152563146
Cox4i2	ENSMUSG00000009876	2	152579909	152590773
Bcl2l1	ENSMUSG00000007659	2	152593052	152657464
Tpx2	ENSMUSG00000027469	2	152673700	152721057
Mylk2	ENSMUSG00000027470	2	152737088	152748804
Foxs1	ENSMUSG00000074676	2	152757634	152758944
Dusp15	ENSMUSG00000042662	2	152766731	152777434
Ttll9	ENSMUSG00000074673	2	152788221	152834218
Pdrg1	ENSMUSG00000027472	2	152834626	152841163
Xkr7	ENSMUSG00000042631	2	152857588	152881511
BC020535	ENSMUSG00000027474	2	152891691	152907471
Hck	ENSMUSG00000003283	2	152934204	152977177
Tm9sf4	ENSMUSG00000068040	2	152987039	153036202
Tspyl3	ENSMUSG00000074671	2	153048116	153051177
Plagl2	ENSMUSG00000051413	2	153053495	153067162
Pofut1	ENSMUSG00000046020	2	153067269	153095983
Kif3b	ENSMUSG00000027475	2	153117149	153159126
Asxl1	ENSMUSG00000042548	2	153171581	153229743
8430427H17Rik	ENSMUSG00000061411	2	153233198	153355707
4930404H24Rik	ENSMUSG00000079001	2	153318526	153319577
Commd7	ENSMUSG00000056941	2	153442669	153458517
Dnmt3b	ENSMUSG00000027478	2	153475186	153513466
Mapre1	ENSMUSG00000027479	2	153567010	153599046
Efcab8	ENSMUSG00000044083	2	153606615	153670488
Sun5	ENSMUSG00000027480	2	153681924	153696820
Bpifb2	ENSMUSG00000027481	2	153700781	153721006
Bpifb6	ENSMUSG00000068009	2	153726124	153738531
Bpifb3	ENSMUSG00000068008	2	153743966	153758732
Bpifb4	ENSMUSG00000074665	2	153763948	153789837
Bpifa6	ENSMUSG00000078998	2	153800681	153826231
Bpifa2	ENSMUSG00000042459	2	153834001	153841815
2500004C02Rik	ENSMUSG00000073236	2	153166893	153171809
Gm14472	ENSMUSG00000082283	2	153239585	153239866
Rps15a-ps7	ENSMUSG00000081087	2	152011027	152011418
Gm17559	ENSMUSG00000090656	2	152520469	152522428
Gm14164	ENSMUSG00000068062	2	152171405	152201060
Gm14165	ENSMUSG00000081434	2	152179351	152180302
Gm14158	ENSMUSG00000083230	2	152283507	152283814
Gm14156	ENSMUSG00000082689	2	152293130	152293612
Gm14161	ENSMUSG00000084935	2	152375450	152379668
Gm14163	ENSMUSG00000089684	2	152434910	152435126
1700030C14Rik	ENSMUSG00000087148	2	152478619	152480066
Gm14162	ENSMUSG00000082318	2	152571419	152572043
Gm14199	ENSMUSG00000089898	2	152815753	152817367
7530422B04Rik	ENSMUSG00000079000	2	153474426	153476022
Gm14490	ENSMUSG00000082079	2	153522388	153555641
Gm14494	ENSMUSG00000083097	2	153651789	153652570
Gm14497	ENSMUSG00000081013	2	153912571	153913150
AL731857.1	ENSMUSG00000093306	2	152598524	152598625
AL833801.1	ENSMUSG00000093746	2	152690803	152690862
U6	ENSMUSG00000089499	2	152980749	152980851
Gm7536	ENSMUSG00000057036	3	24231969	24232474
AC138200.1	ENSMUSG00000080481	3	23112334	23112416
7SK	ENSMUSG00000088115	3	24617638	24617903
U6	ENSMUSG00000070227	3	24460996	24461102
Gm10259	ENSMUSG00000069083	3	25109938	25111352
Gm15462	ENSMUSG00000086189	3	30585007	30591288
Gm15496	ENSMUSG00000085953	3	31184509	31215813
Phc3	ENSMUSG00000037652	3	30798217	30868337
Prkci	ENSMUSG00000037643	3	30894669	30951663
Skil	ENSMUSG00000027660	3	30993980	31021499
Cldn11	ENSMUSG00000037625	3	31048868	31063246
Slc7a14	ENSMUSG00000069072	3	31101832	31209300
Kcnmb2	ENSMUSG00000037610	3	31801429	32099102
Arpm1	ENSMUSG00000037737	3	30495995	30498861
Mynn	ENSMUSG00000037730	3	30501009	30517414
Lrrc34	ENSMUSG00000027702	3	30523189	30546791
Lrriq4	ENSMUSG00000027703	3	30543429	30571353
Lrrc31	ENSMUSG00000074653	3	30577980	30598765
Samd7	ENSMUSG00000051860	3	30645215	30666096
Sec62	ENSMUSG00000027706	3	30691798	30720185
Gpr160	ENSMUSG00000037661	3	30754872	30796114
Mecom	ENSMUSG00000027684	3	29850221	30446930
Telomerase-vert	ENSMUSG00000065361	3	30494268	30494679
Vmn2r1	ENSMUSG00000027824	3	63885564	63909380
Vmn2r2	ENSMUSG00000043897	3	63920354	63944465
Vmn2r3	ENSMUSG00000091572	3	64062883	64091417
Vmn2r4	ENSMUSG00000092049	3	64192543	64219218
Vmn2r5	ENSMUSG00000068999	3	64294743	64313657
Vmn2r6	ENSMUSG00000090581	3	64341483	64369220
Vmn2r7	ENSMUSG00000062200	3	64494582	64648687
Kcnab1	ENSMUSG00000027827	3	64913306	65182145
Gm16162	ENSMUSG00000090131	3	63629716	63630366
Gm16129	ENSMUSG00000085290	3	63647038	63647991
Gm9479	ENSMUSG00000090303	3	63856953	63859532
Gm5139	ENSMUSG00000093447	3	63967312	63967560
Gm18294	ENSMUSG00000093416	3	63999496	64017599
Vmn2r-ps4	ENSMUSG00000093503	3	64132582	64136775
Vmn2r-ps5	ENSMUSG00000091967	3	64143487	64161646
Vmn2r-ps6	ENSMUSG00000093395	3	64240805	64242209
Vmn2r-ps7	ENSMUSG00000093546	3	64246522	64247897
RP23-445D13.2	ENSMUSG00000093671	3	64251889	64264017
Vmn2r-ps8	ENSMUSG00000093375	3	64280940	64283241
Vmn2r-ps9	ENSMUSG00000093699	3	64395437	64396818
RP23-445D13.4	ENSMUSG00000093484	3	64400835	64409695
Vmn2r-ps10	ENSMUSG00000093646	3	64425616	64427917
Vmn2r-ps10	ENSMUSG00000090261	3	64427143	64427917
Vmn2r-ps11	ENSMUSG00000093434	3	64436496	64648665
AC110575.2	ENSMUSG00000093524	3	64436785	64648665
Vmn2r-ps12	ENSMUSG00000093474	3	64548671	64549567
Vmn2r-ps12	ENSMUSG00000090010	3	64548671	64549539
RP24-549B23.7	ENSMUSG00000093414	3	64574208	64574440
Vmn2r-ps13	ENSMUSG00000093767	3	64703079	64703684
Gm17548	ENSMUSG00000091540	3	63767555	63772581
Mme	ENSMUSG00000027820	3	63099794	63186153
Plch1	ENSMUSG00000036834	3	63500156	63703394
E130311K13Rik	ENSMUSG00000048581	3	63718606	63733394
Gmps	ENSMUSG00000027823	3	63780028	63826501
Slc33a1	ENSMUSG00000027822	3	63737429	63768690
U6	ENSMUSG00000088360	3	63574134	63574231
U6	ENSMUSG00000088957	3	63292915	63293020
snoU13	ENSMUSG00000089457	3	63711633	63711734
snoU109	ENSMUSG00000088735	3	64122329	64122486
U6	ENSMUSG00000089039	3	63913557	63913659
SNORA17	ENSMUSG00000088824	3	64698393	64698518
Eltd1	ENSMUSG00000039167	3	151100851	151208050
Ifi44	ENSMUSG00000028037	3	151393886	151412911
H28	ENSMUSG00000039146	3	151422605	151425870
Ptgfr	ENSMUSG00000028036	3	151461882	151500594
Gipc2	ENSMUSG00000039131	3	151756497	151829194
Dnajb4	ENSMUSG00000028035	3	151841475	151873243
Fubp1	ENSMUSG00000028034	3	151873422	151899794
Nexn	ENSMUSG00000039103	3	151899950	151929284
Fam73a	ENSMUSG00000054942	3	151936423	152003371
Usp33	ENSMUSG00000025437	3	152009442	152056576
Zzz3	ENSMUSG00000039068	3	152058437	152125790
Ak5	ENSMUSG00000039058	3	152125779	152331104
Pigk	ENSMUSG00000039047	3	152377064	152643372
St6galnac5	ENSMUSG00000039037	3	152480045	152645210
St6galnac3	ENSMUSG00000052544	3	152868369	153388026
Gm16198	ENSMUSG00000084343	3	151816411	151817080
Rpl29-ps1	ENSMUSG00000090095	3	152443738	152445025
Gm16232	ENSMUSG00000090040	3	152539015	152539181
Gm16213	ENSMUSG00000090017	3	152583204	152584363
Gm16231	ENSMUSG00000090163	3	152606277	152606908
AI115009	ENSMUSG00000085901	3	152329877	152344396
U6	ENSMUSG00000065138	3	151271307	151271413
U7	ENSMUSG00000087997	3	151589312	151589373
Fam110b	ENSMUSG00000049119	4	5571237	6035370
Ubxn2b	ENSMUSG00000028243	4	6118245	6148835
Cyp7a1	ENSMUSG00000028240	4	6192759	6202780
Sdcbp	ENSMUSG00000028249	4	6292797	6335570
Nsmaf	ENSMUSG00000028245	4	6323354	6381418
Tox	ENSMUSG00000041272	4	6613500	6918704
Gm11782	ENSMUSG00000087099	4	5472385	5478370
Gm11781	ENSMUSG00000084237	4	5530071	5530542
4930423M02Rik	ENSMUSG00000086066	4	5559475	5569431
Gm11796	ENSMUSG00000083232	4	5781663	5782634
Gm11797	ENSMUSG00000084360	4	5997021	5997774
Gm11798	ENSMUSG00000080961	4	6187238	6188112
4930430E12Rik	ENSMUSG00000085295	4	6279252	6284677
Gm10056	ENSMUSG00000058945	4	6372185	6375059
Gm11803	ENSMUSG00000081913	4	6435088	6435531
Gm11801	ENSMUSG00000081388	4	6466708	6467453
Gm11802	ENSMUSG00000086052	4	6615316	6631307
Gm11804	ENSMUSG00000083023	4	6966194	6966661
SNORA17	ENSMUSG00000077302	4	6561311	6561442
SNORA17	ENSMUSG00000077392	4	5614824	5614949
Cnbd1	ENSMUSG00000073991	4	18787601	19049673
Cngb3	ENSMUSG00000056494	4	19207997	19437770
Cpne3	ENSMUSG00000028228	4	19446401	19497255
Fam82b	ENSMUSG00000028229	4	19502309	19534079
Gm12353	ENSMUSG00000078772	4	19532598	19578277
Wwp1	ENSMUSG00000041058	4	19535450	19636140
Slc7a13	ENSMUSG00000041052	4	19745872	19769365
Atp6v0d2	ENSMUSG00000028238	4	19803988	19849752
Ttpa	ENSMUSG00000073988	4	19935085	19957932
Ggh	ENSMUSG00000073987	4	19968857	19993897
Nkain3	ENSMUSG00000055761	4	20046021	20706013
4930598A11Rik	ENSMUSG00000090934	4	19959993	19968711
Gm11867	ENSMUSG00000087402	4	18334496	18818989
Gm11868	ENSMUSG00000050550	4	18771349	18772928
Gm12392	ENSMUSG00000083005	4	18891711	18892648
Gm12393	ENSMUSG00000083105	4	19186243	19187090
Gm11877	ENSMUSG00000082320	4	19225480	19226331
Gm12354	ENSMUSG00000086071	4	19643879	19647346
4930480G23Rik	ENSMUSG00000086332	4	19906592	19912535
Gm11872	ENSMUSG00000086017	4	20270853	20274965
Gm11873	ENSMUSG00000081964	4	20318243	20319546
7SK	ENSMUSG00000089578	4	18635895	18636180
7SK	ENSMUSG00000089090	4	19441637	19441926
7SK	ENSMUSG00000088500	4	18657364	18657695
Gm11925	ENSMUSG00000080771	4	30120797	30121331
Gm11924	ENSMUSG00000087180	4	30359262	30450933
4930556G01Rik	ENSMUSG00000085522	4	30591746	30723813
Gm11920	ENSMUSG00000082949	4	30629123	30629685
Gm11921	ENSMUSG00000084402	4	30694720	30695039
Gm11922	ENSMUSG00000082254	4	31307622	31308096
BX255946.1	ENSMUSG00000076428	4	30629099	30629207
U6	ENSMUSG00000065053	4	31102059	31102162
Tm2d1	ENSMUSG00000028563	4	98022061	98049997
Inadl	ENSMUSG00000061859	4	98062476	98386294
L1td1	ENSMUSG00000087166	4	98393425	98405171
Kank4	ENSMUSG00000035407	4	98421589	98484228
I0C0044D17Rik	ENSMUSG00000073794	4	98485166	98490531
Usp1	ENSMUSG00000028560	4	98590501	98602234
Dock7	ENSMUSG00000028556	4	98603356	98787606
Angptl3	ENSMUSG00000028553	4	98697645	98712802
Atg4c	ENSMUSG00000028550	4	98860625	98926478
Gm10305	ENSMUSG00000070892	4	98939362	98941836
Gm12689	ENSMUSG00000070891	4	98962591	98963382
Foxd3	ENSMUSG00000067261	4	99322990	99325362
Alg6	ENSMUSG00000073792	4	99382355	99430151
Itgb3bp	ENSMUSG00000028549	4	99432093	99602418
Gm10967	ENSMUSG00000078631	4	99439047	99441197
Efcab7	ENSMUSG00000073791	4	99495889	99585393
Pgm2	ENSMUSG00000025791	4	99602019	99659899
Ror1	ENSMUSG00000035305	4	99768396	100117370
0610025J13Rik	ENSMUSG00000046683	4	97988089	97998482
Gm12788	ENSMUSG00000082144	4	98019118	98019425
Gm12846	ENSMUSG00000081046	4	98331057	98332828
Gm17376	ENSMUSG00000090718	4	98412426	98412513
A730085A09Rik	ENSMUSG00000085843	4	98460459	98465591
Gm12851	ENSMUSG00000084188	4	98522305	98522725
Gm12852	ENSMUSG00000081733	4	98769751	98770469
Gm12705	ENSMUSG00000087395	4	98783105	98784992
Gm12681	ENSMUSG00000086498	4	98813605	98828333
Gm12685	ENSMUSG00000081184	4	99085189	99085402
Gm12686	ENSMUSG00000082442	4	99085464	99085860
Gm12684	ENSMUSG00000081150	4	99096947	99097945
Gm12683	ENSMUSG00000080803	4	99186743	99187157
Gm12690	ENSMUSG00000087332	4	99236191	99239702
Gm12687	ENSMUSG00000083698	4	99282508	99283213
Gm12688	ENSMUSG00000086096	4	99320298	99321674
Gm12682	ENSMUSG00000086592	4	99329232	99379663
Gm12702	ENSMUSG00000085142	4	99725125	99738589
Gm12701	ENSMUSG00000086385	4	99792226	99793446
U4	ENSMUSG00000084478	4	99582402	99582483
BX005053.1	ENSMUSG00000092763	4	99324433	99324521
AL627124.1	ENSMUSG00000076294	4	98328328	98328423
U6	ENSMUSG00000088548	4	98050093	98050182
AL671229.1	ENSMUSG00000093123	4	98224431	98224556
AL671140.1	ENSMUSG00000093135	4	98025885	98025994
Ube2u	ENSMUSG00000069733	4	100151465	100222752
Gm12706	ENSMUSG00000080967	4	100033967	100034664
Gm12698	ENSMUSG00000085871	4	100195852	100200406
Gm12699	ENSMUSG00000081553	4	100239713	100240653
Gm12700	ENSMUSG00000082601	4	100253883	100254339
Rab3b	ENSMUSG00000003411	4	108551668	108615929
Nrd1	ENSMUSG00000053510	4	108673260	108734382
Osbpl9	ENSMUSG00000028559	4	108733750	108874877
Calr4	ENSMUSG00000028558	4	108907090	108927176
Eps15	ENSMUSG00000028552	4	108952873	109060422
Ttc39a	ENSMUSG00000028555	4	109079228	109117350
Rnf11	ENSMUSG00000028557	4	109123703	109157333
4930522H14Rik	ENSMUSG00000060491	4	109177942	109203902
Cdkn2c	ENSMUSG00000028551	4	109333481	109339794
Faf1	ENSMUSG00000010517	4	109349193	109636565
Dmrta2	ENSMUSG00000047143	4	109650658	109656292
Elavl4	ENSMUSG00000028546	4	109876327	110024514
Agbl4	ENSMUSG00000061298	4	110070266	111336929
Gm12736	ENSMUSG00000082699	4	108606178	108606413
8030443G20Rik	ENSMUSG00000086483	4	108615448	108644682
Gm12749	ENSMUSG00000083512	4	109046306	109047464
Gm12750	ENSMUSG00000085873	4	109076399	109078760
Gm12811	ENSMUSG00000087641	4	109241819	109329396
Gm12803	ENSMUSG00000082771	4	109302187	109303330
9630013D21Rik	ENSMUSG00000059027	4	109324134	109330458
Gm12808	ENSMUSG00000083995	4	109427019	109427422
3010003L10Rik	ENSMUSG00000085256	4	109649343	109650418
Gm12806	ENSMUSG00000081813	4	110182640	110182907
Gm12807	ENSMUSG00000082348	4	110185376	110186337
AL669940.1	ENSMUSG00000093374	4	110112295	110112375
SNORA17	ENSMUSG00000077687	4	109209644	109209774
U6	ENSMUSG00000088285	4	108671207	108671311
7SK	ENSMUSG00000088014	4	108833529	108833802
Mir761	ENSMUSG00000076444	4	108690260	108690335
Tas1r3	ENSMUSG00000029072	4	155233377	155237471
Mmp23	ENSMUSG00000029061	4	155024764	155027493
Ttll10	ENSMUSG00000029074	4	155408949	155433453
Gm10564	ENSMUSG00000073686	4	154416155	154419531
Pex10	ENSMUSG00000029047	4	154441125	154446542
Rer1	ENSMUSG00000029048	4	154448219	154460491
Morn1	ENSMUSG00000029049	4	154460686	154519614
Ski	ENSMUSG00000029050	4	154528184	154596701
2610002J02Rik	ENSMUSG00000073684	4	154623911	154630793
Prkcz	ENSMUSG00000029053	4	154634238	154735470
Gabrd	ENSMUSG00000029054	4	154759089	154772221
2010015L04Rik	ENSMUSG00000042233	4	154783299	154822053
C030017K20Rik	ENSMUSG00000078490	4	154825679	154840639
Tmem52	ENSMUSG00000023153	4	154843223	154844966
Gnb1	ENSMUSG00000029064	4	154865470	154933378
9430015G10Rik	ENSMUSG00000059939	4	155484091	155501374
Agrn	ENSMUSG00000041936	4	155539399	155571536
Cpsf3l	ENSMUSG00000029034	4	155243655	155263212
Pusl1	ENSMUSG00000051557	4	155261988	155265890
Acap3	ENSMUSG00000029033	4	155265984	155281360
Ube2j2	ENSMUSG00000023286	4	155317940	155333713
Fam132a	ENSMUSG00000023571	4	155336427	155340738
B3galt6	ENSMUSG00000050796	4	155363575	155366787
Sdf4	ENSMUSG00000029076	4	155366981	155387719
Tnfrsf4	ENSMUSG00000029075	4	155387952	155390721
Tnfrsf18	ENSMUSG00000041954	4	155400273	155403004
Dvl1	ENSMUSG00000029071	4	155221511	155233412
Gm17585	ENSMUSG00000090418	4	155144078	155150270
Gltpd1	ENSMUSG00000029073	4	155238832	155243549
Tnfrsf14	ENSMUSG00000042333	4	154296319	154302672
Hes5	ENSMUSG00000048001	4	154335032	154336480
Pank4	ENSMUSG00000029056	4	154338232	154355047
Plch2	ENSMUSG00000029055	4	154357224	154430893
Mib2	ENSMUSG00000029060	4	155028786	155043307
B930041F14Rik	ENSMUSG00000074738	4	155068451	155070590
Ssu72	ENSMUSG00000029038	4	155078909	155107988
1500002C15Rik	ENSMUSG00000073681	4	155107973	155108359
Gm5151	ENSMUSG00000084845	4	155108909	155114673
Atad3a	ENSMUSG00000029036	4	155114750	155135207
Vwa1	ENSMUSG00000042116	4	155142258	155148807
Tmem88b	ENSMUSG00000073680	4	155155700	155159983
E230028L10Rik	ENSMUSG00000078487	4	155164548	155173612
Mrpl20	ENSMUSG00000029066	4	155177645	155183885
Ccnl2	ENSMUSG00000029068	4	155186598	155198652
Aurkaip1	ENSMUSG00000065990	4	155205381	155207239
Gm10562	ENSMUSG00000073679	4	155213601	155214287
Nadk	ENSMUSG00000029063	4	154936487	154965110
Slc35e2	ENSMUSG00000042202	4	154975525	154997449
Gm10563	ENSMUSG00000073682	4	154988522	155019608
Cdk11b	ENSMUSG00000029062	4	154998963	155024047
Gm20421	ENSMUSG00000092483	4	154334879	154335787
5830444B04Rik	ENSMUSG00000084803	4	154772872	154795813
Gm13171	ENSMUSG00000082429	4	154876425	154876815
Gm16023	ENSMUSG00000086682	4	154982409	154998864
Gm16024	ENSMUSG00000085063	4	154990518	154990896
B930041F14Rik	ENSMUSG00000091921	4	155068451	155070590
2610204G22Rik	ENSMUSG00000054514	4	155135287	155143373
Gm13644	ENSMUSG00000085119	4	155151585	155158075
Gm16008	ENSMUSG00000087381	4	155397836	155405752
Gm13648	ENSMUSG00000086549	4	155426824	155433911
9930005F22Rik	ENSMUSG00000073672	4	155504622	155507524
Isg15	ENSMUSG00000035692	4	155573533	155574927
AW011738	ENSMUSG00000078349	4	155577413	155579260
2310042D19Rik	ENSMUSG00000078486	4	155590036	155595416
Plekhn1	ENSMUSG00000078485	4	155595565	155602651
Klhl17	ENSMUSG00000078484	4	155603153	155608966
Mxra8	ENSMUSG00000029070	4	155213789	155218197
AL627204.1	ENSMUSG00000092798	4	155303712	155303988
AL627405.1	ENSMUSG00000093431	4	155004113	155004183
AL670236.2	ENSMUSG00000092817	4	155163690	155163815
Mir200b	ENSMUSG00000065549	4	155429790	155429859
AL670236.1	ENSMUSG00000080471	4	155285739	155285859
Mir429	ENSMUSG00000065427	4	155428014	155428096
U6	ENSMUSG00000088545	4	155397167	155397267
Mir200a	ENSMUSG00000065400	4	155429005	155429094
U6	ENSMUSG00000064916	4	155094149	155094250
Ppargc1a	ENSMUSG00000029167	5	51845488	51958964
Dhx15	ENSMUSG00000029169	5	52541448	52581758
Sod3	ENSMUSG00000072941	5	52755185	52762644
Ccdc149	ENSMUSG00000045790	5	52765892	52766785
Lgi2	ENSMUSG00000039252	5	52924758	52957542
9230114K14Rik	ENSMUSG00000087676	5	52581920	52589223
U6	ENSMUSG00000088981	5	52734357	52734461
AC119939.1	ENSMUSG00000080650	5	51614826	51614919
8030423F21Rik	ENSMUSG00000052295	5	52998789	53010250
Sepsecs	ENSMUSG00000029173	5	53031326	53060968
Pi4k2b	ENSMUSG00000029186	5	53132826	53160583
Zcchc4	ENSMUSG00000029179	5	53166648	53215904
Anapc4	ENSMUSG00000029176	5	53225254	53259036
Slc34a2	ENSMUSG00000029188	5	53429321	53462903
Sel1l3	ENSMUSG00000029189	5	53498323	53604691
1810013D10Rik	ENSMUSG00000061461	5	53658345	53674749
Gm17182	ENSMUSG00000090642	5	53438926	53440426
SNORA42	ENSMUSG00000077757	5	53350590	53350701
n-R5s171	ENSMUSG00000077316	5	53534399	53534477
Ereg	ENSMUSG00000029377	5	91503643	91522675
Areg	ENSMUSG00000029378	5	91568641	91577458
Btc	ENSMUSG00000082361	5	91786287	91831939
Parm1	ENSMUSG00000034981	5	91946641	92055920
Rchy1	ENSMUSG00000029397	5	92377930	92392094
Thap6	ENSMUSG00000060466	5	92392359	92401068
Gm1045	ENSMUSG00000055801	5	92416501	92419330
Cdkl2	ENSMUSG00000029403	5	92435100	92472068
G3bp2	ENSMUSG00000029405	5	92481172	92512761
Uso1	ENSMUSG00000029407	5	92566964	92631820
U90926	ENSMUSG00000029409	5	92638922	92644434
Ppef2	ENSMUSG00000029410	5	92656000	92682185
Naaa	ENSMUSG00000029413	5	92686685	92707196
Sdad1	ENSMUSG00000029415	5	92713036	92739050
Cxcl9	ENSMUSG00000029417	5	92750357	92757105
Art3	ENSMUSG00000034842	5	92760853	92843654
Cxcl10	ENSMUSG00000034855	5	92775664	92777915
Nup54	ENSMUSG00000034826	5	92844566	92864245
Scarb2	ENSMUSG00000029426	5	92872899	92934634
Fam47e	ENSMUSG00000057068	5	92984095	93020305
Stbd1	ENSMUSG00000047963	5	93032077	93035605
Ccdc158	ENSMUSG00000050050	5	93036980	93104297
Shroom3	ENSMUSG00000029381	5	93112461	93394344
Sowahb	ENSMUSG00000045314	5	93470149	93474048
4932430I15Rik	ENSMUSG00000072828	5	93233246	93238514
Gm15710	ENSMUSG00000084111	5	91701001	92569955
Cxcl11	ENSMUSG00000060183	5	92788570	92794511
Gm2673	ENSMUSG00000082068	5	92792930	92794537
Gm20500	ENSMUSG00000092266	5	93165231	93166468
Gm6450	ENSMUSG00000092046	5	93432829	93433523
Gm9793	ENSMUSG00000092011	5	92472090	92484986
U6	ENSMUSG00000089018	5	93442058	93442165
SNORA57	ENSMUSG00000084745	5	92622348	92622491
U6atac	ENSMUSG00000088623	5	92731200	92731318
5S_rRNA	ENSMUSG00000088949	5	92547203	92547309
7SK	ENSMUSG00000088102	5	92411731	92412006
U6	ENSMUSG00000064533	5	91646924	91647030
SCARNA4	ENSMUSG00000088777	5	92858811	92858954
SNORA70	ENSMUSG00000088240	5	93502887	93503022
SCARNA23	ENSMUSG00000088712	5	92485090	92485218
Mir1961	ENSMUSG00000089268	5	93217477	93217588
AC122438.1	ENSMUSG00000093609	5	92540374	92540444
Crybb2	ENSMUSG00000042240	5	113487278	113499137
Crybb3	ENSMUSG00000029352	5	113504859	113510604
2900026A02Rik	ENSMUSG00000051339	5	113515343	113592371
Tmem211	ENSMUSG00000066964	5	113655929	113668283
Sgsm1	ENSMUSG00000042216	5	113672240	113739806
Aym1	ENSMUSG00000053873	5	113786314	113786841
Wscd2	ENSMUSG00000063430	5	113919467	114039679
Cmklr1	ENSMUSG00000042190	5	114062363	114100435
1700069L16Rik	ENSMUSG00000042184	5	114142431	114174781
Ficd	ENSMUSG00000053334	5	114185791	114190609
Sart3	ENSMUSG00000018974	5	114192455	114221658
Gm3511	ENSMUSG00000069196	5	114217108	114217421
Iscu	ENSMUSG00000025825	5	114222757	114228297
Tmem119	ENSMUSG00000054675	5	114243738	114250525
Selplg	ENSMUSG00000048163	5	114267807	114280510
Coro1c	ENSMUSG00000004530	5	114292445	114358767
Ssh1	ENSMUSG00000042121	5	114387103	114443903
Dao	ENSMUSG00000042096	5	114453712	114475458
Svop	ENSMUSG00000042078	5	114476919	114541579
Usp30	ENSMUSG00000029592	5	114550342	114573515
Alkbh2	ENSMUSG00000044339	5	114573935	114578227
Ung	ENSMUSG00000029591	5	114580395	114589332
Acacb	ENSMUSG00000042010	5	114596544	114700770
Foxn4	ENSMUSG00000042002	5	114704173	114723816
Myo1h	ENSMUSG00000066952	5	114764950	114814585
Kctd10	ENSMUSG00000001098	5	114813576	114830524
Ube3b	ENSMUSG00000029577	5	114830637	114871177
Mmab	ENSMUSG00000029575	5	114881043	114894068
Mvk	ENSMUSG00000041939	5	114894278	114910600
BC057022	ENSMUSG00000041930	5	115018025	115063229
Trpv4	ENSMUSG00000014158	5	115072161	115108430
Gltp	ENSMUSG00000011884	5	115119412	115140993
Tchp	ENSMUSG00000002486	5	115157769	115172336
Git2	ENSMUSG00000041890	5	115177416	115225526
Ankrd13a	ENSMUSG00000041870	5	115224686	115256209
1500011B03Rik	ENSMUSG00000072694	5	115258205	115263985
Gm20499	ENSMUSG00000092252	5	115259045	115273469
1500011B03Rik	ENSMUSG00000092279	5	115262802	115263954
2610524H06Rik	ENSMUSG00000092486	5	115271944	115273477
Gm13821	ENSMUSG00000078186	5	115292358	115292871
4930519G04Rik	ENSMUSG00000029564	5	115303673	115333668
Gm9936	ENSMUSG00000054123	5	115305767	115308691
Oasl2	ENSMUSG00000029561	5	115346943	115362243
Oasl1	ENSMUSG00000041827	5	115373249	115387924
2210016L21Rik	ENSMUSG00000029559	5	115392167	115399792
Hnf1a	ENSMUSG00000029556	5	115398370	115421076
Sppl3	ENSMUSG00000029550	5	115461146	115548799
Wscd2	ENSMUSG00000085571	5	113919772	113919960
Gm15736	ENSMUSG00000085713	5	114094972	114095691
Gm17122	ENSMUSG00000090458	5	114292610	114293125
Gm16108	ENSMUSG00000089734	5	114515470	114539475
Gm13784	ENSMUSG00000084243	5	114687185	114687934
Gm13789	ENSMUSG00000085590	5	114813424	114815366
Gm13790	ENSMUSG00000086302	5	115001298	115004025
4930515G01Rik	ENSMUSG00000092183	5	115223746	115224992
Gm13820	ENSMUSG00000078187	5	115266974	115267111
Gm13819	ENSMUSG00000082052	5	115278582	115279224
Gm13823	ENSMUSG00000080707	5	115317690	115318034
Gm13822	ENSMUSG00000087477	5	115367327	115373286
Gm13824	ENSMUSG00000086054	5	115418793	115448055
Gm13825	ENSMUSG00000086140	5	115418832	115421409
AC151577.1	ENSMUSG00000093343	5	113690296	113690368
U6	ENSMUSG00000065320	5	114378733	114378813
Srrm4	ENSMUSG00000063919	5	116889281	117041826
Gstm2-ps1	ENSMUSG00000091578	5	117082917	117083471
4930569F06Rik	ENSMUSG00000041512	5	117271463	117271895
Suds3	ENSMUSG00000066900	5	117541691	117566002
Taok3	ENSMUSG00000061288	5	117570138	117725228
Pebp1	ENSMUSG00000032959	5	117732660	117737634
Gm10399	ENSMUSG00000072688	5	117768754	117769251
Vsig10	ENSMUSG00000066894	5	117769275	117805014
Wsb2	ENSMUSG00000029364	5	117807313	117828610
Rfc5	ENSMUSG00000029363	5	117828112	117839056
Ksr2	ENSMUSG00000061578	5	117864009	118213336
Nos1	ENSMUSG00000029361	5	118231041	118408849
Fbxo21	ENSMUSG00000032898	5	118426779	118460200
Tesc	ENSMUSG00000029359	5	118477752	118511887
Fbxw8	ENSMUSG00000032867	5	118514990	118605467
Gm9754	ENSMUSG00000029360	5	118515369	118519719
Hrk	ENSMUSG00000046607	5	118619773	118639487
Rnft2	ENSMUSG00000032850	5	118640745	118695125
2410131K14Rik	ENSMUSG00000032840	5	118695236	118716102
2410137F16Rik	ENSMUSG00000086219	5	116888729	116915496
9530046B11Rik	ENSMUSG00000086047	5	117565227	117568732
Gm15727	ENSMUSG00000081274	5	117798916	117799353
Gm15728	ENSMUSG00000086075	5	117839148	117843507
BC051077	ENSMUSG00000091333	5	117762529	117765548
7SK	ENSMUSG00000089248	5	118661062	118661351
SNORA17	ENSMUSG00000077540	5	118716458	118716589
n-R5s174	ENSMUSG00000084587	5	117646564	117646684
U6	ENSMUSG00000088293	5	118598797	118598903
U6	ENSMUSG00000088085	5	118426463	118426569
AC132338.1	ENSMUSG00000093041	5	118868736	118868827
Grm8	ENSMUSG00000024211	6	27225121	28085178
6530409C15Rik	ENSMUSG00000043340	6	28165555	28210862
Zfp800	ENSMUSG00000039841	6	28189931	28348005
Gcc1	ENSMUSG00000029708	6	28366091	28378390
Arf5	ENSMUSG00000020440	6	28373560	28376602
Fscn3	ENSMUSG00000029707	6	28377789	28388622
Pax4	ENSMUSG00000029706	6	28392334	28399353
Snd1	ENSMUSG00000001424	6	28425139	28885162
Lrrc4	ENSMUSG00000049939	6	28611831	28781747
Lep	ENSMUSG00000059201	6	29010220	29023877
Rbm28	ENSMUSG00000029701	6	29073573	29115006
Prrt4	ENSMUSG00000079654	6	29119232	29129584
Impdh1	ENSMUSG00000003500	6	29150434	29166364
Hilpda	ENSMUSG00000043421	6	29222488	29225446
Fam71f2	ENSMUSG00000079652	6	29229593	29240680
Fam71f1	ENSMUSG00000039742	6	29269140	29286021
Calu	ENSMUSG00000029767	6	29298069	29327110
Opn1sw	ENSMUSG00000058831	6	29326671	29338468
Ccdc136	ENSMUSG00000029769	6	29346309	29376955
Flnc	ENSMUSG00000068699	6	29383153	29411888
Atp6v1f	ENSMUSG00000004285	6	29417718	29420512
Gm9047	ENSMUSG00000090685	6	29421437	29423465
Kcp	ENSMUSG00000059022	6	29423162	29457952
Irf5	ENSMUSG00000029771	6	29476625	29491869
Tnpo3	ENSMUSG00000012535	6	29490827	29559887
Gm5303	ENSMUSG00000083107	6	28311914	28313165
Gm3294	ENSMUSG00000092090	6	28931634	28972165
Gm17172	ENSMUSG00000090692	6	29272804	29273206
Gm17515	ENSMUSG00000072491	6	29457725	29459698
Tspan33	ENSMUSG00000001763	6	29644222	29668559
Mir592	ENSMUSG00000076067	6	27886655	27886750
Mir129-1	ENSMUSG00000065469	6	28972619	28972691
SNORA17	ENSMUSG00000089289	6	29184434	29184564
U1	ENSMUSG00000064436	6	29063441	29063606
AC044807.1	ENSMUSG00000092956	6	29346617	29346705
U6	ENSMUSG00000088643	6	29437717	29437822
AC153909.1	ENSMUSG00000093288	6	29100554	29100679
Gm13724	ENSMUSG00000082036	6	29910993	29912147
Gm13725	ENSMUSG00000083961	6	29913644	29913850
1700023L04Rik	ENSMUSG00000045709	6	29935329	29943776
1700095J07Rik	ENSMUSG00000084861	6	30254605	30281779
1700012C14Rik	ENSMUSG00000085470	6	30410128	30413313
Gm13781	ENSMUSG00000086854	6	30523153	30526035
Gm13782	ENSMUSG00000086542	6	30623944	30632266
Gm14528	ENSMUSG00000083221	6	30669873	30670103
4930412F09Rik	ENSMUSG00000085321	6	30846899	30893470
Gm13834	ENSMUSG00000084894	6	31037609	31037912
Gm13833	ENSMUSG00000087312	6	31052846	31054646
Gm13835	ENSMUSG00000086922	6	31091979	31092663
2210408F21Rik	ENSMUSG00000087380	6	31170351	31287404
Gm14532	ENSMUSG00000086931	6	31306743	31322369
Gm13845	ENSMUSG00000086212	6	31316885	31348773
Gm13844	ENSMUSG00000086855	6	31322895	31333877
Gm6117	ENSMUSG00000086732	6	31524967	31526723
Gm13847	ENSMUSG00000086804	6	31555211	31693316
Gm13846	ENSMUSG00000086885	6	31601041	31612021
Gm13848	ENSMUSG00000084973	6	31612220	31616131
Gm13849	ENSMUSG00000087379	6	31736675	31872270
Copg2	ENSMUSG00000025607	6	30697554	30846794
Tsga13	ENSMUSG00000039032	6	30846981	30865573
Klf14	ENSMUSG00000073209	6	30906021	30908990
AB041803	ENSMUSG00000044471	6	31115523	31168433
Mkln1	ENSMUSG00000025609	6	31348735	31466811
Podxl	ENSMUSG00000025608	6	31469488	31513981
Fam40b	ENSMUSG00000039629	6	29867013	29909681
Nrf1	ENSMUSG00000058440	6	29997988	30103458
Ube2h	ENSMUSG00000039159	6	30161289	30254539
Zc3hc1	ENSMUSG00000039130	6	30316380	30341028
Klhdc10	ENSMUSG00000029775	6	30351868	30405179
Tmem209	ENSMUSG00000029782	6	30429053	30459783
1700025E21Rik	ENSMUSG00000029784	6	30459849	30470254
Cpa2	ENSMUSG00000071553	6	30491582	30514476
Cpa4	ENSMUSG00000039070	6	30518369	30542418
Cpa5	ENSMUSG00000029788	6	30561010	30581745
Cpa1	ENSMUSG00000054446	6	30589218	30595363
Tsga14	ENSMUSG00000029790	6	30603457	30643749
Mest	ENSMUSG00000051855	6	30673547	30698457
Mir335	ENSMUSG00000065501	6	30691299	30691396
Mir96	ENSMUSG00000065586	6	30119446	30119551
7SK	ENSMUSG00000065343	6	30093801	30094127
Mir29b-1	ENSMUSG00000065604	6	31013017	31013097
AC134897.1	ENSMUSG00000092900	6	29938388	29938489
n-R5s161	ENSMUSG00000065662	6	30329101	30329214
Mir182	ENSMUSG00000076361	6	30115918	30115992
5S_rRNA	ENSMUSG00000087846	6	30297371	30297466
U6	ENSMUSG00000065078	6	29913555	29913661
Mir29a	ENSMUSG00000065610	6	31012660	31012747
Mir183	ENSMUSG00000065619	6	30119668	30119737
9530036M11Rik	ENSMUSG00000087670	6	54096881	54100931
Gm15526	ENSMUSG00000080205	6	54127474	54127677
Gm15527	ENSMUSG00000086946	6	54195736	54229070
9130019P16Rik	ENSMUSG00000073067	6	54219675	54380215
Gm15863	ENSMUSG00000085341	6	54585183	54593344
2410066E13Rik	ENSMUSG00000038065	6	54631734	54653845
Znrf2	ENSMUSG00000058446	6	54766910	54843494
Nod1	ENSMUSG00000038058	6	54873936	54922606
Ggct	ENSMUSG00000002797	6	54932574	54942944
Gars	ENSMUSG00000029777	6	54987995	55029498
Crhr2	ENSMUSG00000003476	6	55040043	55083010
Inmt	ENSMUSG00000003477	6	55120620	55125037
Fam188b	ENSMUSG00000038022	6	55153377	55270216
Aqp1	ENSMUSG00000004655	6	55286426	55298549
Ghrhr	ENSMUSG00000004654	6	55326289	55338524
Adcyap1r1	ENSMUSG00000029778	6	55401972	55451445
Neurod6	ENSMUSG00000037984	6	55627812	55631257
Ccdc129	ENSMUSG00000037973	6	55786889	55928729
Cpvl	ENSMUSG00000052955	6	53823373	53928656
Chn2	ENSMUSG00000004633	6	53989548	54251804
Prr15	ENSMUSG00000045725	6	54277006	54280194
Wipf3	ENSMUSG00000086040	6	54379597	54453762
Scrn1	ENSMUSG00000019124	6	54455884	54516483
Fkbp14	ENSMUSG00000038074	6	54527598	54547338
Plekha8	ENSMUSG00000005225	6	54545105	54595833
snoU13	ENSMUSG00000087797	6	55096412	55096510
SNORA17	ENSMUSG00000077501	6	54924645	54924773
AC083946.1	ENSMUSG00000092808	6	55258799	55258899
Gm5570	ENSMUSG00000073045	6	59981961	60100039
Mageb16-ps2	ENSMUSG00000064018	6	60720390	60721053
A530053G22Rik	ENSMUSG00000046764	6	60346343	60353692
Snca	ENSMUSG00000025889	6	60681567	60779849
Mmrn1	ENSMUSG00000054641	6	60874970	60939372
Fam190a	ENSMUSG00000039578	6	61130318	62332859
A730020E08Rik	ENSMUSG00000085849	6	61125607	61130804
SNORA44	ENSMUSG00000065754	6	59655740	59655868
SNORA44	ENSMUSG00000064804	6	60021052	60021180
n-R5s162	ENSMUSG00000064515	6	60200786	60200904
Vmn1r34	ENSMUSG00000091012	6	66586817	66587746
Mad2l1	ENSMUSG00000029910	6	66485384	66491027
Vmn1r32	ENSMUSG00000062905	6	66502177	66509702
Vmn1r33	ENSMUSG00000059375	6	66561442	66566056
Vmn1r-ps24	ENSMUSG00000093504	6	66703374	66704273
Gm15644	ENSMUSG00000084154	6	66962479	66962865
E230016M11Rik	ENSMUSG00000087231	6	66986593	67030648
A430010J10Rik	ENSMUSG00000048665	6	67115197	67115610
Gm8566	ENSMUSG00000047905	6	67155505	67156161
A430010J10Rik	ENSMUSG00000091724	6	67065667	67118420
Vmn1r35	ENSMUSG00000060699	6	66628788	66629678
Vmn1r36	ENSMUSG00000093764	6	66665896	66666924
Vmn1r37	ENSMUSG00000057612	6	66681386	66682294
Vmn1r38	ENSMUSG00000093632	6	66726138	66727173
Vmn1r39	ENSMUSG00000093755	6	66754206	66755437
4930597O21Rik	ENSMUSG00000053442	6	66844648	66846515
Gng12	ENSMUSG00000036402	6	66846391	66971344
Gadd45a	ENSMUSG00000036390	6	66985090	66987451
Serbp1	ENSMUSG00000036371	6	67216973	67239296
Il12rb2	ENSMUSG00000018341	6	67241312	67326182
Il23r	ENSMUSG00000049093	6	67372926	67441849
Tacstd2	ENSMUSG00000051397	6	67484053	67485816
Igkv1-115	ENSMUSG00000091800	6	68111409	68111750
Igkv2-137	ENSMUSG00000076501	6	67505630	67506210
Igkv1-135	ENSMUSG00000076502	6	67559739	67560502
Igkv17-134	ENSMUSG00000091268	6	67670723	67671219
Igkv1-133	ENSMUSG00000076503	6	67674908	67675655
Igkv1-132	ENSMUSG00000076504	6	67709694	67710407
Igkv1-131	ENSMUSG00000076505	6	67716030	67716766
Igkv14-130	ENSMUSG00000076506	6	67741040	67741505
Igkv9-129	ENSMUSG00000076507	6	67789787	67790260
Igkv17-127	ENSMUSG00000076508	6	67811153	67811653
Igkv14-126	ENSMUSG00000076509	6	67846171	67846636
Igkv11-125	ENSMUSG00000076510	6	67863567	67864046
Igkv9-124	ENSMUSG00000076511	6	67892068	67892354
Igkv9-123	ENSMUSG00000076512	6	67904222	67904684
Igkv1-122	ENSMUSG00000076513	6	67966736	67967482
Igkv17-121	ENSMUSG00000076514	6	67986812	67987312
Igkv9-120	ENSMUSG00000076515	6	67999977	68000450
Igkv1-117	ENSMUSG00000076516	6	68071085	68071821
Igkv2-116	ENSMUSG00000076517	6	68101879	68102613
Igkv2-112	ENSMUSG00000076518	6	68169975	68170700
Igkv14-111	ENSMUSG00000076519	6	68206398	68206863
Igkv1-110	ENSMUSG00000076520	6	68220521	68221261
U1	ENSMUSG00000064987	6	66977037	66977170
SNORA17	ENSMUSG00000087917	6	67754369	67754504
SNORA17	ENSMUSG00000089157	6	67742433	67742570
SNORA17	ENSMUSG00000088245	6	67847059	67847198
SNORA17	ENSMUSG00000088900	6	68207388	68207532
Suclg1	ENSMUSG00000052738	6	73198376	73226905
4931417E11Rik	ENSMUSG00000056197	6	73418598	73419661
AC122362.1	ENSMUSG00000092739	6	73342136	73342237
AC174081.1	ENSMUSG00000076984	6	74455049	74455158
SNORA17	ENSMUSG00000077182	6	74290944	74291075
U6	ENSMUSG00000064408	6	74401791	74401898
Olfr211	ENSMUSG00000053391	6	116443629	116444558
Olfr212	ENSMUSG00000053251	6	116456534	116467983
Olfr213	ENSMUSG00000081649	6	116490473	116491456
Olfr214	ENSMUSG00000051046	6	116506423	116507430
Olfr215	ENSMUSG00000050654	6	116531956	116533049
Zfp422	ENSMUSG00000059878	6	116574034	116579017
Rassf4	ENSMUSG00000042129	6	116583026	116623854
8430408G22Rik	ENSMUSG00000048489	6	116600702	116602865
Tmem72	ENSMUSG00000048108	6	116642648	116666931
Cxcl12	ENSMUSG00000061353	6	117118553	117131385
Rpl28-ps4	ENSMUSG00000090549	6	117163674	117164066
Gm7292	ENSMUSG00000072829	6	117666491	117667485
Zfp637	ENSMUSG00000059689	6	117791198	117795974
Zfp239	ENSMUSG00000042097	6	117812118	117822784
Hnrnpf	ENSMUSG00000042079	6	117850358	117875639
4933440N22Rik	ENSMUSG00000042087	6	117857128	117857778
Fxyd4	ENSMUSG00000004988	6	117883747	117887353
Rasgef1a	ENSMUSG00000030134	6	117961392	118041564
Csgalnact2	ENSMUSG00000042042	6	118057470	118089158
Ret	ENSMUSG00000030110	6	118101766	118147762
Bms1	ENSMUSG00000030138	6	118333401	118369435
Zfp248	ENSMUSG00000030145	6	118377337	118405546
Zfp9	ENSMUSG00000072623	6	118411968	118429338
Gm5580	ENSMUSG00000060393	6	116501160	116502622
Gm9946	ENSMUSG00000054488	6	117509715	117522347
Gm6253	ENSMUSG00000071237	6	117758346	117759596
Gm4875	ENSMUSG00000082791	6	117947225	117948010
SNORA17	ENSMUSG00000088374	6	116715547	116715670
AC153918.1	ENSMUSG00000093105	6	117885487	117885611
AC140192.1	ENSMUSG00000093079	6	118379188	118379270
U7	ENSMUSG00000087849	6	116561593	116561654
SNORA17	ENSMUSG00000077787	6	118061932	118062063
Cecr2	ENSMUSG00000071226	6	120616387	120721208
Slc25a18	ENSMUSG00000004902	6	120723786	120744000
Atp6v1e1	ENSMUSG00000019210	6	120745263	120772703
Bcl2l13	ENSMUSG00000009112	6	120786248	120842860
Bid	ENSMUSG00000004446	6	120841948	120866871
Mical3	ENSMUSG00000051586	6	120881725	120953171
Mical3	ENSMUSG00000003178	6	120951381	121031627
Pex26	ENSMUSG00000067825	6	121133685	121148855
Tuba8	ENSMUSG00000030137	6	121160752	121176872
Usp18	ENSMUSG00000030107	6	121195924	121220934
Slc6a13	ENSMUSG00000030108	6	121250245	121287751
Slc6a12	ENSMUSG00000030109	6	121293094	121315793
Iqsec3	ENSMUSG00000040797	6	121322948	121423696
A2m	ENSMUSG00000030111	6	121586191	121629255
Mug1	ENSMUSG00000059908	6	121788559	121839075
Mug2	ENSMUSG00000030131	6	121956816	122035985
Klrg1	ENSMUSG00000030114	6	122220614	122232900
M6pr	ENSMUSG00000007458	6	122258738	122267698
Phc1	ENSMUSG00000040669	6	122267749	122290579
1700063H04Rik	ENSMUSG00000040657	6	122341397	122342705
Rimklb	ENSMUSG00000040649	6	122397314	122436340
Mfap5	ENSMUSG00000030116	6	122455863	122479308
Aicda	ENSMUSG00000040627	6	122503819	122514198
Apobec1	ENSMUSG00000040613	6	122527810	122552462
Gdf3	ENSMUSG00000030117	6	122555421	122560105
Dppa3	ENSMUSG00000046323	6	122576428	122580290
Nanog	ENSMUSG00000012396	6	122657507	122664651
Slc2a3	ENSMUSG00000003153	6	122677827	122751658
Gm4651	ENSMUSG00000090813	6	121014482	121019972
Gm15856	ENSMUSG00000086527	6	121173710	121176171
Gm10319	ENSMUSG00000071204	6	122086646	122102034
Gm8430	ENSMUSG00000055093	6	122406900	122407425
Gm16556	ENSMUSG00000090192	6	122510062	122520867
Gm16557	ENSMUSG00000090044	6	122513301	122513491
Gm8459	ENSMUSG00000089931	6	122516733	122517492
Gm10420	ENSMUSG00000072789	6	122645990	122646939
Gm10224	ENSMUSG00000080932	6	122648382	122649068
AC084273.1	ENSMUSG00000093409	6	120747592	120747688
Y_RNA	ENSMUSG00000065721	6	122573565	122573676
AC153982.1	ENSMUSG00000078042	6	121275598	121275694
Kap	ENSMUSG00000032758	6	133799873	133803685
Etv6	ENSMUSG00000030199	6	133985718	134220176
Bcl2l14	ENSMUSG00000030200	6	134346336	134388754
Lrp6	ENSMUSG00000030201	6	134396494	134516983
Mansc1	ENSMUSG00000032718	6	134559228	134582506
Loh12cr1	ENSMUSG00000042992	6	134589645	134661202
Dusp16	ENSMUSG00000030203	6	134665488	134742643
Crebl2	ENSMUSG00000032652	6	134780172	134808949
Gpr19	ENSMUSG00000032641	6	134819111	134847943
Cdkn1b	ENSMUSG00000003031	6	134870419	134875531
Apold1	ENSMUSG00000090698	6	134932019	134936854
Ddx47	ENSMUSG00000030204	6	134961630	134973794
Gprc5a	ENSMUSG00000046733	6	135015669	135034727
Gprc5d	ENSMUSG00000030205	6	135056009	135068301
Hebp1	ENSMUSG00000042770	6	135087537	135118233
8430419L09Rik	ENSMUSG00000030207	6	135147995	135194973
Gsg1	ENSMUSG00000030206	6	135187347	135204354
Pbp2	ENSMUSG00000047104	6	135259802	135260365
Emp1	ENSMUSG00000030208	6	135312949	135333191
Gm17088	ENSMUSG00000091438	6	134118897	134122025
Gm17089	ENSMUSG00000092134	6	134183176	134193729
Dynlt1-ps1	ENSMUSG00000082691	6	135299426	135299767
SNORA36	ENSMUSG00000065187	6	135534210	135534324
AC122359.1	ENSMUSG00000093148	6	133711706	133711788
SNORA17	ENSMUSG00000088372	6	135098666	135098799
Gm10172	ENSMUSG00000066697	7	78477249	78477807
Gm10294	ENSMUSG00000081895	7	79793613	79794216
Gm10295	ENSMUSG00000070511	7	78493847	78496371
Mctp2	ENSMUSG00000032776	7	79222718	79451481
Gm4885	ENSMUSG00000070035	7	79817704	79819164
1500012K07Rik	ENSMUSG00000086403	7	82453588	82476305
Sv2b	ENSMUSG00000053025	7	82259783	82454148
Akap13	ENSMUSG00000066406	7	82600420	82899495
Gm7580	ENSMUSG00000085161	7	81537584	81556119
Gm10619	ENSMUSG00000074067	7	80953108	80961389
St8sia2	ENSMUSG00000025789	7	81084005	81158568
Slco3a1	ENSMUSG00000025790	7	81420305	81699666
AC158749.1	ENSMUSG00000076961	7	82902145	82902254
snoU109	ENSMUSG00000089573	7	81134982	81135120
U6	ENSMUSG00000087896	7	82813759	82813842
7SK	ENSMUSG00000088683	7	82419975	82420297
7SK	ENSMUSG00000089522	7	82107233	82107583
6330503K22Rik	ENSMUSG00000033904	7	125856066	125880538
Gde1	ENSMUSG00000033917	7	125832059	125849292
9030624J02Rik	ENSMUSG00000030982	7	125883740	125986480
2310008H09Rik	ENSMUSG00000030980	7	125985736	125999768
Iqck	ENSMUSG00000073856	7	125999274	126116166
Xylt1	ENSMUSG00000030657	7	124524493	124811265
Rps15a	ENSMUSG00000008683	7	125247892	125259700
Arl6ip1	ENSMUSG00000030654	7	125262405	125273139
Smg1	ENSMUSG00000030655	7	125274832	125387151
Syt17	ENSMUSG00000058420	7	125525370	125587066
Itpripl2	ENSMUSG00000073859	7	125628628	125629997
Itpripl2	ENSMUSG00000073858	7	125633241	125634848
Coq7	ENSMUSG00000030652	7	125653173	125676870
Tmc7	ENSMUSG00000042246	7	125679357	125728250
4930583K01Rik	ENSMUSG00000055159	7	125387379	125389065
Tmc5	ENSMUSG00000030650	7	125740811	125818600
SNORA24	ENSMUSG00000077667	7	125976079	125976192
AC141566.1	ENSMUSG00000088116	7	124920308	124920412
U6	ENSMUSG00000087922	7	125423375	125423479
SNORA71	ENSMUSG00000065874	7	125296994	125297124
U6	ENSMUSG00000064971	7	124096103	124096209
Itgam	ENSMUSG00000030786	7	135206154	135271674
Itgax	ENSMUSG00000030789	7	135273061	135294171
Itgad	ENSMUSG00000070369	7	135297890	135367330
Cox6a2	ENSMUSG00000030785	7	135348950	135349880
9130023H24Rik	ENSMUSG00000062944	7	135377965	135381545
Armc5	ENSMUSG00000042178	7	135380871	135388614
Tgfb1i1	ENSMUSG00000030782	7	135390326	135398287
Slc5a2	ENSMUSG00000030781	7	135409171	135415944
BC017158	ENSMUSG00000030780	7	135414893	135441684
Rgs10	ENSMUSG00000030844	7	135517135	135562272
Tial1	ENSMUSG00000030846	7	135583291	135605231
Bag3	ENSMUSG00000030847	7	135667097	135690491
Inpp5f	ENSMUSG00000042105	7	135754842	135839939
Mcmbp	ENSMUSG00000048170	7	135839955	135884009
Sec23ip	ENSMUSG00000055319	7	135888384	135928350
Ppapdc1a	ENSMUSG00000070366	7	136400608	136534821
Wdr11	ENSMUSG00000042055	7	136735377	136779252
Gm15503	ENSMUSG00000084964	7	135553934	135555855
Gm16044	ENSMUSG00000081339	7	135836203	135836652
U1	ENSMUSG00000064677	7	135205219	135205374
AC130474.1	ENSMUSG00000093125	7	135621528	135621652
U6	ENSMUSG00000088566	7	135877716	135877817
n-R5s158	ENSMUSG00000077283	7	135918360	135918477
AC136741.1	ENSMUSG00000080363	7	135969861	135969981
Mir3103	ENSMUSG00000093215	7	135431883	135431949
U6	ENSMUSG00000065763	7	137178608	137178717
Myom2	ENSMUSG00000031461	8	15057653	15133541
Cdc16	ENSMUSG00000038416	8	13757676	13781938
Rasa3	ENSMUSG00000031453	8	13566950	13677603
4932443I19Rik	ENSMUSG00000090336	8	13705889	13743066
Gm3160	ENSMUSG00000085371	8	14136310	14136916
Gm16350	ENSMUSG00000090024	8	14961066	14961586
Gm15678	ENSMUSG00000083000	8	15100329	15101350
Kbtbd11	ENSMUSG00000055675	8	15011025	15033330
BB014433	ENSMUSG00000049008	8	15041444	15046078
Upf3a	ENSMUSG00000038398	8	13785615	13798538
AF366264	ENSMUSG00000057116	8	13835233	13838089
Zfp828	ENSMUSG00000047710	8	13869641	13881639
2410022L05Rik	ENSMUSG00000031458	8	13884788	13890271
Gm7676	ENSMUSG00000068631	8	13896311	13896631
Fbxo25	ENSMUSG00000038365	8	13907803	13940521
2610019F03Rik	ENSMUSG00000050052	8	13952009	13975032
Erich1	ENSMUSG00000051978	8	14027565	14090327
Gm10699	ENSMUSG00000074461	8	14090461	14092590
Dlgap2	ENSMUSG00000047495	8	14095865	14847684
C030037F17Rik	ENSMUSG00000084945	8	14745329	14747427
Cln8	ENSMUSG00000026317	8	14881335	14901720
Arhgef10	ENSMUSG00000071176	8	14911663	15001085
SNORA17	ENSMUSG00000077503	8	15227405	15227537
SNORA17	ENSMUSG00000088311	8	14273181	14273311
SNORA3	ENSMUSG00000065817	8	13876097	13876226
AC122806.2	ENSMUSG00000077091	8	15413980	15414089
5S_rRNA	ENSMUSG00000089459	8	15412324	15412416
AC122806.1	ENSMUSG00000077051	8	15418536	15418645
Agpat6	ENSMUSG00000031545	8	24283418	24318925
Nkx6-3	ENSMUSG00000063672	8	24263743	24269420
1700041G16Rik	ENSMUSG00000054822	8	23918747	23919204
Plat	ENSMUSG00000031538	8	23868216	23893319
Ikbkb	ENSMUSG00000031537	8	23769684	23817061
Gins4	ENSMUSG00000031546	8	24337082	24348140
Golga7	ENSMUSG00000015341	8	24351825	24367546
Gm17362	ENSMUSG00000074911	8	23755333	23756758
Gm16625	ENSMUSG00000084900	8	25532876	25550480
Myst3	ENSMUSG00000031540	8	23970007	24053731
Gm15346	ENSMUSG00000085199	8	23796737	23806118
Gm10043	ENSMUSG00000058567	8	24068510	24069036
Gm15815	ENSMUSG00000083285	8	24237928	24238182
Gm15816	ENSMUSG00000086741	8	24249266	24260057
Ap3m2	ENSMUSG00000031539	8	23897826	23916126
Sfrp1	ENSMUSG00000031548	8	24521974	24560104
Zmat4	ENSMUSG00000037492	8	24746491	25267057
A730045E13Rik	ENSMUSG00000053979	8	25284376	25296040
1810011O10Rik	ENSMUSG00000056313	8	25548088	25549418
Ank1	ENSMUSG00000031543	8	24085316	24260969
Slc20a2	ENSMUSG00000037656	8	23587172	23680079
Vdac3	ENSMUSG00000008892	8	23687573	23704230
Dkk4	ENSMUSG00000031535	8	23734515	23738008
Polb	ENSMUSG00000031536	8	23738591	23763909
U6	ENSMUSG00000089484	8	23932900	23933017
Mir486	ENSMUSG00000070084	8	24253027	24253154
SNORA17	ENSMUSG00000077399	8	24400505	24400636
Ddhd2	ENSMUSG00000061313	8	26835796	26865068
Adam9	ENSMUSG00000031555	8	26060083	26127394
Gm17484	ENSMUSG00000091514	8	26864981	26880176
Bag4	ENSMUSG00000037316	8	26875010	26895681
Lsm1	ENSMUSG00000037296	8	26896063	26914447
Star	ENSMUSG00000031574	8	26918946	26925782
Ash2l	ENSMUSG00000031575	8	26926663	26958166
Kcnu1	ENSMUSG00000031576	8	26960095	27048405
Hgsnat	ENSMUSG00000037260	8	27054931	27087216
4930444A02Rik	ENSMUSG00000037251	8	27091076	27104593
Fnta	ENSMUSG00000015994	8	27109201	27126073
Hook3	ENSMUSG00000037234	8	27131893	27229696
Rnf170	ENSMUSG00000013878	8	27229840	27254343
Thap1	ENSMUSG00000037214	8	27268684	27273412
Fgfr1	ENSMUSG00000091895	8	26629267	26642853
Letm2	ENSMUSG00000037363	8	26688964	26707959
Whsc1l1	ENSMUSG00000054823	8	26712073	26830139
Ppapdc1b	ENSMUSG00000031570	8	26830533	26835359
Tm2d2	ENSMUSG00000031556	8	26127683	26133731
Htra4	ENSMUSG00000037406	8	26135923	26149434
Plekha2	ENSMUSG00000031557	8	26149616	26212666
Tacc1	ENSMUSG00000065954	8	26265024	26311921
Fgfr1	ENSMUSG00000031565	8	26624126	26686186
Ido2	ENSMUSG00000031549	8	25642364	25686805
Ido1	ENSMUSG00000031551	8	25694608	25707481
Adam18	ENSMUSG00000031552	8	25712718	25785227
Adam3	ENSMUSG00000031553	8	25787697	25836324
Adam5	ENSMUSG00000031554	8	25837565	25934841
Adam32	ENSMUSG00000037437	8	25946612	26059276
Gm16933	ENSMUSG00000086289	8	26147524	26152229
Gm10689	ENSMUSG00000074412	8	26564745	26565183
Gm16159	ENSMUSG00000086134	8	26659133	26666555
D830025C05Rik	ENSMUSG00000043794	8	26707484	26708461
1700047A11Rik	ENSMUSG00000085437	8	27193081	27213166
SNORA70	ENSMUSG00000088037	8	26742422	26742551
7SK	ENSMUSG00000087981	8	27350622	27350880
U6	ENSMUSG00000088736	8	26048772	26048874
SNORA17	ENSMUSG00000089302	8	25791286	25791409
7SK	ENSMUSG00000088176	8	26789422	26789743
SNORA33	ENSMUSG00000084543	8	26720900	26721030
Aga	ENSMUSG00000031521	8	54597080	54608776
Neil3	ENSMUSG00000039396	8	54672221	54724419
Vegfc	ENSMUSG00000031520	8	55162886	55271808
Asb5	ENSMUSG00000031519	8	55635684	55673189
Spata4	ENSMUSG00000031518	8	55686134	55695451
Wdr17	ENSMUSG00000039375	8	55714408	55972537
Spcs3	ENSMUSG00000054408	8	55605787	55615351
5330439A09Rik	ENSMUSG00000089708	8	55653903	55686340
Gm15758	ENSMUSG00000089719	8	55794340	55795734
U7	ENSMUSG00000089068	8	54579207	54579268
SNORA17	ENSMUSG00000088678	8	54091762	54091877
n-R5s98	ENSMUSG00000084498	8	55951614	55951732
Gpm6a	ENSMUSG00000031517	8	56040081	56146231
Adam29	ENSMUSG00000046258	8	58349709	58385745
Glra3	ENSMUSG00000038257	8	58419257	58604226
Hpgd	ENSMUSG00000031613	8	58773349	58799843
BC088983	ENSMUSG00000038215	8	59010319	59029844
Fbxo8	ENSMUSG00000038206	8	59029887	59071190
Hand2	ENSMUSG00000038193	8	59799780	59803314
Scrg1	ENSMUSG00000031610	8	59934720	59956382
Sap30	ENSMUSG00000031609	8	59961504	59966657
Hmgb2	ENSMUSG00000054717	8	59990640	59994796
Galnt7	ENSMUSG00000031608	8	60002625	60131829
Galntl6	ENSMUSG00000061864	8	60255979	61390424
5033428I22Rik	ENSMUSG00000085268	8	59810915	59819479
2500002B13Rik	ENSMUSG00000086276	8	59966851	59987674
Gm10284	ENSMUSG00000070025	8	60029049	60030280
SNORA17	ENSMUSG00000077585	8	59000169	59000300
AC116121.1	ENSMUSG00000076392	8	59040098	59040206
SNORA65	ENSMUSG00000077526	8	60028572	60028685
BC030500	ENSMUSG00000049946	8	61390552	61393095
Gm17517	ENSMUSG00000091944	8	60650232	60777663
Gm15882	ENSMUSG00000090003	8	61002091	61003123
Gm15881	ENSMUSG00000085254	8	61178643	61179584
U6	ENSMUSG00000088657	8	62038112	62038219
Isx	ENSMUSG00000031621	8	77396618	77417405
Hmgxb4	ENSMUSG00000034518	8	77517255	77555877
Tom1	ENSMUSG00000042870	8	77557585	77594020
Hmox1	ENSMUSG00000005413	8	77617490	77624495
Mcm5	ENSMUSG00000005410	8	77633427	77652338
Rasd2	ENSMUSG00000034472	8	77737843	77748012
Gm10358	ENSMUSG00000072432	8	77929237	77930465
1700007B14Rik	ENSMUSG00000031620	8	77972593	78508402
Gm11033	ENSMUSG00000079011	8	77114886	77357846
Gm7984	ENSMUSG00000049891	8	77922410	77922947
Gm7901	ENSMUSG00000082280	8	78235499	78237095
U3	ENSMUSG00000080421	8	77986473	77986694
4922502B01Rik	ENSMUSG00000054165	8	111772617	111774008
4922502B01Rik	ENSMUSG00000057387	8	111774381	111775628
Pmfbp1	ENSMUSG00000031727	8	112017927	112066542
Dhx38	ENSMUSG00000037993	8	112071917	112089501
Txnl4b	ENSMUSG00000031723	8	112089792	112097951
Hp	ENSMUSG00000031722	8	112099030	112103072
Dhodh	ENSMUSG00000031730	8	112115243	112132573
Pkd1l3	ENSMUSG00000048827	8	112138417	112198286
2400003C14Rik	ENSMUSG00000031729	8	112195222	112217194
Zfp821	ENSMUSG00000031728	8	112229449	112248832
Atxn1l	ENSMUSG00000069895	8	112250351	112261639
Ap1g1	ENSMUSG00000031731	8	112302454	112385258
Phlpp2	ENSMUSG00000031732	8	112392442	112468571
Marveld3	ENSMUSG00000001672	8	112471814	112486103
Tat	ENSMUSG00000001670	8	112514337	112523703
Chst4	ENSMUSG00000035930	8	112552975	112563234
Zfp612	ENSMUSG00000044676	8	112603664	112614081
Gm17720	ENSMUSG00000091041	8	112606703	112626653
Calb2	ENSMUSG00000003657	8	112661402	112692110
Ftsjd1	ENSMUSG00000046441	8	112741860	112748389
Hydin	ENSMUSG00000059854	8	112790877	113134153
Vac14	ENSMUSG00000010936	8	113142503	113244296
Mtss1l	ENSMUSG00000033763	8	113245376	113265300
Il34	ENSMUSG00000031750	8	113265729	113329824
Sf3b3	ENSMUSG00000033732	8	113334139	113370703
Cog4	ENSMUSG00000031753	8	113370500	113406127
Fuk	ENSMUSG00000033703	8	113406363	113426359
St3gal2	ENSMUSG00000031749	8	113443822	113496380
Ddx19a	ENSMUSG00000015023	8	113498896	113521700
Ddx19b	ENSMUSG00000033658	8	113527088	113555651
Aars	ENSMUSG00000031960	8	113557044	113581564
Clec18a	ENSMUSG00000033633	8	113593398	113605988
Pdpr	ENSMUSG00000033624	8	113618530	113660974
Gm17344	ENSMUSG00000078143	8	112383884	112392355
Gm16349	ENSMUSG00000085678	8	112449288	112457563
Gm15894	ENSMUSG00000090039	8	113278892	113282870
Gm15895	ENSMUSG00000085068	8	113329538	113331377
D030068K23Rik	ENSMUSG00000085859	8	111599122	111797711
Gm17466	ENSMUSG00000090569	8	112789148	112791362
Gm17642	ENSMUSG00000091270	8	113387129	113464214
Snord111	ENSMUSG00000080396	8	113362428	113362516
AC069308.1	ENSMUSG00000093112	8	113022752	113023027
U6	ENSMUSG00000084507	8	112364488	112364589
SNORA57	ENSMUSG00000065100	8	113447016	113447163
Mir3473d	ENSMUSG00000093087	8	113540350	113540430
Snord71	ENSMUSG00000077549	8	112363195	112363279
AC093451.1	ENSMUSG00000092671	8	113565848	113565924
AC123838.1	ENSMUSG00000092821	8	111949544	111949644
U6	ENSMUSG00000064393	8	112945261	112945367
SNORD111	ENSMUSG00000080518	8	113366283	113366358
Dynlrb2	ENSMUSG00000034467	8	119028915	119039796
Cdyl2	ENSMUSG00000031758	8	119098301	119256891
2310061C15Rik	ENSMUSG00000014633	8	119412585	119445355
Cenpn	ENSMUSG00000031756	8	119445640	119465403
Atmin	ENSMUSG00000047388	8	119467293	119484345
1700030J22Rik	ENSMUSG00000031847	8	119493499	119502843
Gcsh	ENSMUSG00000034424	8	119505710	119517437
Pkd1l2	ENSMUSG00000034416	8	119519579	119606349
Bcmo1	ENSMUSG00000031845	8	119619754	119657620
Gan	ENSMUSG00000052557	8	119682035	119729734
4933407C03Rik	ENSMUSG00000034390	8	119780919	119985403
Plcg2	ENSMUSG00000034330	8	120022191	120159040
Sdr42e1	ENSMUSG00000034308	8	120185299	120197589
Hsd17b2	ENSMUSG00000031844	8	120225846	120282929
Mphosph6	ENSMUSG00000031843	8	120315545	120325829
Gm10620	ENSMUSG00000074072	8	119288044	119289379
Gm15395	ENSMUSG00000085688	8	119560397	119567539
RP23-230G11.1	ENSMUSG00000093446	8	119649235	119649638
Gm10617	ENSMUSG00000074065	8	120325962	120327134
U7	ENSMUSG00000087787	8	118912950	118913013
AL583883.1	ENSMUSG00000077927	8	120594616	120594686
Mmp12	ENSMUSG00000049723	9	7344381	7369499
Mmp1b	ENSMUSG00000041620	9	7368239	7388047
Mmp3	ENSMUSG00000043613	9	7445822	7455972
Mmp1a	ENSMUSG00000043089	9	7464141	7476869
Mmp10	ENSMUSG00000047562	9	7502352	7510238
Mmp8	ENSMUSG00000005800	9	7558429	7568486
Mmp27	ENSMUSG00000070323	9	7571396	7581885
Mmp20	ENSMUSG00000018620	9	7628231	7674968
Mmp7	ENSMUSG00000018623	9	7692086	7699585
Gm10709	ENSMUSG00000074516	9	7751725	7752207
Tmem123	ENSMUSG00000050912	9	7764041	7794333
Birc2	ENSMUSG00000057367	9	7818236	7835255
C330006D17Rik	ENSMUSG00000049742	9	7836687	7837064
Birc3	ENSMUSG00000032000	9	7848699	7873186
Yap1	ENSMUSG00000053110	9	7931999	8004596
9230110C19Rik	ENSMUSG00000053070	9	8021672	8042823
AK129341	ENSMUSG00000040729	9	8076633	8134294
1700128F08Rik	ENSMUSG00000031998	9	8221889	8241987
Trpc6	ENSMUSG00000031997	9	8544432	8680565
Pgr	ENSMUSG00000031870	9	8900419	8965425
Gm16485	ENSMUSG00000078117	9	8971791	8975773
Arhgap42	ENSMUSG00000050730	9	8994953	9239026
Gm17571	ENSMUSG00000090592	9	9247040	9247605
Gm16833	ENSMUSG00000085253	9	9260683	9260883
AV064505	ENSMUSG00000086381	9	7669429	7695631
Gm20416	ENSMUSG00000092185	9	7965838	7977004
CT030639.1	ENSMUSG00000093615	9	7784390	7784440
U7	ENSMUSG00000088076	9	9301391	9301452
Mir1899	ENSMUSG00000084747	9	8246786	8246881
5730577I03Rik	ENSMUSG00000062470	9	20411919	20421715
1700084C06Rik	ENSMUSG00000086016	9	20896199	20932837
Gm20519	ENSMUSG00000092261	9	21338071	21338429
Rpl15-ps3	ENSMUSG00000061167	9	21990001	21990683
Gm10182	ENSMUSG00000066826	9	22125549	22125821
Zfp26	ENSMUSG00000063108	9	20237416	20264606
Zfp426	ENSMUSG00000059475	9	20272993	20297190
Zfp266	ENSMUSG00000060510	9	20299512	20325861
Zfp846	ENSMUSG00000058192	9	20385769	20399638
Fbxl12	ENSMUSG00000066892	9	20422562	20449211
Ubl5	ENSMUSG00000084786	9	20447322	20451584
Pin1	ENSMUSG00000032171	9	20456574	20471028
Olfm2	ENSMUSG00000032172	9	20472144	20532673
Col5a3	ENSMUSG00000004098	9	20574494	20619511
Rdh8	ENSMUSG00000053773	9	20622948	20630607
A230050P20Rik	ENSMUSG00000038884	9	20673086	20678751
Angptl6	ENSMUSG00000038742	9	20678253	20684171
Ppan	ENSMUSG00000004100	9	20692619	20696622
Eif3g	ENSMUSG00000070319	9	20698796	20703044
Dnmt1	ENSMUSG00000004099	9	20711650	20757317
S1pr2	ENSMUSG00000043895	9	20770396	20781237
Mrpl4	ENSMUSG00000003299	9	20807181	20813279
Icam1	ENSMUSG00000037405	9	20820404	20833241
Icam4	ENSMUSG00000001014	9	20833817	20834975
Icam5	ENSMUSG00000032174	9	20836482	20843480
Zglp1	ENSMUSG00000079681	9	20866837	20871537
Fdx1l	ENSMUSG00000079677	9	20871964	20877958
Raver1	ENSMUSG00000010205	9	20878612	20896443
Tyk2	ENSMUSG00000032175	9	20908521	20931790
Cdc37	ENSMUSG00000019471	9	20942985	20954350
Pde4a	ENSMUSG00000032177	9	20970158	21017692
Keap1	ENSMUSG00000003308	9	21034174	21043776
S1pr5	ENSMUSG00000045087	9	21047356	21052887
Atg4d	ENSMUSG00000002820	9	21069743	21078812
Kri1	ENSMUSG00000035047	9	21077902	21092415
Cdkn2d	ENSMUSG00000066860	9	21092907	21095653
Ap1m2	ENSMUSG00000003309	9	21099901	21116777
Slc44a2	ENSMUSG00000057193	9	21142288	21159469
Ilf3	ENSMUSG00000032178	9	21172387	21209794
Qtrt1	ENSMUSG00000002825	9	21216281	21224721
Dnm2	ENSMUSG00000033335	9	21229352	21312203
Tmed1	ENSMUSG00000032180	9	21311824	21314631
AB124611	ENSMUSG00000057191	9	21330620	21349777
Carm1	ENSMUSG00000032185	9	21351338	21393931
Yipf2	ENSMUSG00000032182	9	21393153	21397223
1810026J23Rik	ENSMUSG00000048429	9	21397166	21400390
Smarca4	ENSMUSG00000032187	9	21420613	21508674
Ldlr	ENSMUSG00000032193	9	21528038	21554360
Spc24	ENSMUSG00000074476	9	21559886	21564733
Kank2	ENSMUSG00000032194	9	21571217	21602990
Dock6	ENSMUSG00000032198	9	21604628	21657079
Gm6484	ENSMUSG00000047822	9	21639954	21641790
Rab3d	ENSMUSG00000019066	9	21711935	21722636
Tmem205	ENSMUSG00000040883	9	21725453	21731906
Ccdc159	ENSMUSG00000006241	9	21731915	21740316
BC018242	ENSMUSG00000040563	9	21741477	21753344
2310047B19Rik	ENSMUSG00000051238	9	21760197	21762714
Epor	ENSMUSG00000006235	9	21763343	21768020
Rgl3	ENSMUSG00000040146	9	21775971	21793897
Ccdc151	ENSMUSG00000039632	9	21794315	21807078
Prkcsh	ENSMUSG00000003402	9	21807479	21818663
Elavl3	ENSMUSG00000003410	9	21819449	21856467
Zfp653	ENSMUSG00000038895	9	21859904	21875789
Ecsit	ENSMUSG00000066839	9	21876714	21889819
Cnn1	ENSMUSG00000001349	9	21903725	21914074
Elof1	ENSMUSG00000013822	9	21917433	21921592
Acp5	ENSMUSG00000001348	9	21931175	21940190
Pigyl	ENSMUSG00000010607	9	21961290	21962802
Zfp872	ENSMUSG00000074472	9	22001511	22005068
1810064F22Rik	ENSMUSG00000090925	9	22011785	22012990
Zfp809	ENSMUSG00000057982	9	22030274	22047641
Zfp599	ENSMUSG00000062794	9	22051874	22064339
Zfp810	ENSMUSG00000066829	9	22082669	22094985
Anln	ENSMUSG00000036777	9	22135658	22193650
Rp9	ENSMUSG00000032239	9	22215491	22272802
9530077C05Rik	ENSMUSG00000036411	9	22216021	22249121
Gm17272	ENSMUSG00000090422	9	20412210	20416929
Gm20603	ENSMUSG00000091118	9	20832751	20836801
Gm17470	ENSMUSG00000091919	9	20838734	20842226
Gm17523	ENSMUSG00000092119	9	20237204	20367726
Gm16754	ENSMUSG00000087562	9	21029815	21037083
Gm16853	ENSMUSG00000086062	9	21209686	21216164
Gm16961	ENSMUSG00000086570	9	21522060	21527894
Gm16845	ENSMUSG00000087161	9	21875476	21890566
Mir1946b	ENSMUSG00000088478	9	21417888	21418020
AC122525.1	ENSMUSG00000093267	9	21105479	21105754
snoU105B	ENSMUSG00000089571	9	20695201	20695280
7SK	ENSMUSG00000087728	9	20611478	20611798
Mir199a-1	ENSMUSG00000065547	9	21300939	21301008
SNORD105	ENSMUSG00000077702	9	20693928	20694012
Mir1900	ENSMUSG00000084663	9	20836695	20836772
U6	ENSMUSG00000088622	9	20282309	20282422
Gm10181	ENSMUSG00000066810	9	24893866	24893934
Gm10180	ENSMUSG00000066809	9	24905848	24905925
Herpud2	ENSMUSG00000008429	9	24912574	24956280
Sept7	ENSMUSG00000001833	9	25056204	25116150
Eepd1	ENSMUSG00000036611	9	25289132	25411695
B3gat1	ENSMUSG00000045994	9	26541313	26570686
Glb1l2	ENSMUSG00000036395	9	26570629	26614053
Glb1l3	ENSMUSG00000031966	9	26625538	26668408
Gm1110	ENSMUSG00000079644	9	26687152	26730666
AC141438.1	ENSMUSG00000080606	9	25620440	25620560
SNORA17	ENSMUSG00000077697	9	25377263	25377390
SNORA70	ENSMUSG00000088876	9	25346682	25346790
SNORA71	ENSMUSG00000088731	9	24768980	24769113
Gm15606	ENSMUSG00000087531	9	28005472	28007106
Gm15520	ENSMUSG00000085449	9	28867384	28877784
Igsf9b	ENSMUSG00000034275	9	27106813	27142348
Spata19	ENSMUSG00000031991	9	27204406	27209295
Opcml	ENSMUSG00000062257	9	27598360	28732995
Ntm	ENSMUSG00000059974	9	28802335	29770726
7SK	ENSMUSG00000088881	9	29069998	29070200
Gm16071	ENSMUSG00000081343	9	30901787	30902579
Gm7244	ENSMUSG00000091003	9	31082483	31082860
Gm3756	ENSMUSG00000091639	9	31744044	31744340
Snx19	ENSMUSG00000031993	9	30234693	30274311
Adamts15	ENSMUSG00000033453	9	30706740	30730037
Adamts8	ENSMUSG00000031994	9	30750147	30771423
Zbtb44	ENSMUSG00000047412	9	30838229	30883464
St14	ENSMUSG00000031995	9	30896987	30939438
Aplp2	ENSMUSG00000031996	9	30957142	31019400
Prdm10	ENSMUSG00000042496	9	31088123	31186128
Nfrkb	ENSMUSG00000042185	9	31193777	31228918
Tmem45b	ENSMUSG00000041737	9	31233784	31271823
Barx2	ENSMUSG00000032033	9	31653682	31721047
Arhgap32	ENSMUSG00000041444	9	31923721	32076031
Gm17508	ENSMUSG00000091427	9	30888202	30890060
snoU13	ENSMUSG00000089569	9	31078495	31078590
U6	ENSMUSG00000064713	9	30099453	30099559
AC160635.1	ENSMUSG00000093088	9	31874756	31874881
2810417H13Rik	ENSMUSG00000040204	9	65738044	65751073
Csnk1g1	ENSMUSG00000032384	9	65756781	65892816
Ppib	ENSMUSG00000032383	9	65907976	65914436
Snx22	ENSMUSG00000039452	9	65912983	65917538
Snx1	ENSMUSG00000032382	9	65935940	65974394
Fam96a	ENSMUSG00000032381	9	65974418	65986762
Dapk2	ENSMUSG00000032380	9	66006030	66120049
Herc1	ENSMUSG00000038664	9	66198257	66356582
Fbxl22	ENSMUSG00000050503	9	66356266	66362400
Usp3	ENSMUSG00000032376	9	66362444	66440949
Gm16218	ENSMUSG00000059571	9	65145339	65145726
Kbtbd13	ENSMUSG00000054978	9	65237944	65239459
Oaz2	ENSMUSG00000040652	9	65515808	65538107
Gm16073	ENSMUSG00000079915	9	65685974	65686490
Gm15563	ENSMUSG00000086387	9	66419808	66429866
Plekho2	ENSMUSG00000050721	9	65402193	65427847
Ptplad1	ENSMUSG00000033629	9	64834792	64869524
Clpx	ENSMUSG00000015357	9	65142067	65178465
Pdcd7	ENSMUSG00000041837	9	65193875	65207450
Gm514	ENSMUSG00000086228	9	65208867	65228184
Rasl12	ENSMUSG00000041696	9	65246295	65262660
Ostb	ENSMUSG00000053862	9	65260560	65270580
Mtfmt	ENSMUSG00000059183	9	65283589	65300861
Spg21	ENSMUSG00000032388	9	65308744	65336277
Ankdd1a	ENSMUSG00000066510	9	65349260	65364806
Rab11a	ENSMUSG00000004771	9	64563106	64585565
2010321M09Rik	ENSMUSG00000034263	9	64808639	64834781
Parp16	ENSMUSG00000032392	9	65062497	65087026
Cilp	ENSMUSG00000042254	9	65112987	65128413
Rbpms2	ENSMUSG00000032387	9	65477455	65508335
Zfp609	ENSMUSG00000040524	9	65539391	65675371
Trip4	ENSMUSG00000032386	9	65678943	65756601
Igdcc3	ENSMUSG00000032394	9	64988961	65033664
Dennd4a	ENSMUSG00000053641	9	64659147	64767474
Dpp8	ENSMUSG00000032393	9	64880265	64930457
Igdcc4	ENSMUSG00000032816	9	64949293	64985747
Slc24a1	ENSMUSG00000034452	9	64770668	64799414
Pif1	ENSMUSG00000041064	9	65434967	65443774
Megf11	ENSMUSG00000036466	9	64233433	64557012
SNORA17	ENSMUSG00000077385	9	65800121	65800252
AC110235.1	ENSMUSG00000093316	9	65181085	65181318
U5	ENSMUSG00000075930	9	65049533	65049648
n-R5s85	ENSMUSG00000065387	9	65684160	65684272
U6	ENSMUSG00000065301	9	65748008	65748115
U5	ENSMUSG00000075763	9	65044379	65044494
AC122463.1	ENSMUSG00000093119	9	64819476	64819600
U6	ENSMUSG00000084437	9	66208448	66208549
AC161366.1	ENSMUSG00000089574	9	64989093	64989163
SNORA17	ENSMUSG00000089336	9	64729591	64729732
Car12	ENSMUSG00000032373	9	66561493	66614652
Aph1b	ENSMUSG00000032375	9	66623009	66643297
Gm10647	ENSMUSG00000074232	9	66644846	66646881
BC050972	ENSMUSG00000092131	9	66646485	66652166
Ppp1r2-ps4	ENSMUSG00000059237	9	66653113	66653745
Aph1c	ENSMUSG00000053040	9	66662801	66682533
Gm17098	ENSMUSG00000091745	9	66682506	66683341
Rab8b	ENSMUSG00000036943	9	66691479	66767512
Rps27l	ENSMUSG00000036781	9	66793893	66797323
Lactb	ENSMUSG00000032370	9	66803200	66823291
U6	ENSMUSG00000089450	9	66828895	66828992
Tpm1	ENSMUSG00000032366	9	66870397	66897213
U1	ENSMUSG00000088021	9	66952015	66952162
Tln2	ENSMUSG00000052698	9	67064894	67407510
Mir190	ENSMUSG00000076379	9	67084458	67084542
M5C1000I18Rik	ENSMUSG00000055125	9	67606520	67608015
C2cd4b	ENSMUSG00000091956	9	67607244	67608736
C2cd4a	ENSMUSG00000047990	9	67678339	67680137
Vps13c	ENSMUSG00000035284	9	67688203	67843441
SNORA40	ENSMUSG00000088810	9	68128381	68128510
U6	ENSMUSG00000065163	9	68309146	68309252
SNORD113	ENSMUSG00000088587	9	68357970	68358042
Rora	ENSMUSG00000032238	9	68501593	69236053
F830001A07Rik	ENSMUSG00000066690	9	68683148	68683583
Narg2	ENSMUSG00000032235	9	69245713	69280929
Gm15511	ENSMUSG00000086648	9	69196696	69212054
Gm4978	ENSMUSG00000062874	9	69298039	69298854
Anxa2	ENSMUSG00000032231	9	69301427	69339602
Mir3109	ENSMUSG00000093042	9	69304751	69304838
Gm16144	ENSMUSG00000086399	9	69324836	69327405
Foxb1	ENSMUSG00000059246	9	69605517	69608747
B230323A14Rik	ENSMUSG00000087375	9	69606547	69678652
Bnip2	ENSMUSG00000011958	9	69837273	69856124
Gtf2a2	ENSMUSG00000033543	9	69860357	69870673
Gcnt3	ENSMUSG00000032226	9	69879303	69885895
Fam81a	ENSMUSG00000032224	9	69937117	69990367
Gm9531	ENSMUSG00000079225	9	81571219	81572101
Gm15896	ENSMUSG00000081273	9	82096255	82097005
Htr1b	ENSMUSG00000049511	9	81524950	81526222
Mei4	ENSMUSG00000043289	9	81757277	82099614
Irak1bp1	ENSMUSG00000032251	9	82723413	82741295
Gm17255	ENSMUSG00000090679	9	80849043	81097197
D430036J16Rik	ENSMUSG00000085832	9	81525158	81538763
Gm16875	ENSMUSG00000087423	9	81670302	81757503
U6	ENSMUSG00000088760	9	82356963	82357059
SNORA17	ENSMUSG00000077415	9	82141455	82141585
U7	ENSMUSG00000089066	9	82333021	82333081
RP24-309I5.3	ENSMUSG00000093672	10	17512912	17519727
Gm7584	ENSMUSG00000093537	10	17537185	17538124
Gm17711	ENSMUSG00000091367	10	17731074	17731311
Cited2	ENSMUSG00000039910	10	17443034	17445479
Txlnb	ENSMUSG00000039891	10	17516032	17565471
Heca	ENSMUSG00000039879	10	17588432	17667873
3110003A17Rik	ENSMUSG00000078453	10	17731069	17743058
Reps1	ENSMUSG00000019854	10	17775667	17844961
Ect2l	ENSMUSG00000071392	10	17848828	17895141
Ccdc28a	ENSMUSG00000059554	10	17933482	17954804
Nhsl1	ENSMUSG00000039835	10	18110128	18253698
Hebp2	ENSMUSG00000019853	10	18259929	18265882
D10Bwg1379e	ENSMUSG00000019852	10	18307817	18463564
Gm4922	ENSMUSG00000044624	10	18499619	18504817
Perp	ENSMUSG00000019851	10	18564877	18576879
Tnfaip3	ENSMUSG00000019850	10	18720716	18735463
Gm10827	ENSMUSG00000075308	10	17954859	17957866
Rpl48-ps1	ENSMUSG00000093406	10	57321199	57321754
Gm5777	ENSMUSG00000093552	10	57502160	57502607
4933403O03Rik	ENSMUSG00000057216	10	57690605	57691159
Gm10807	ENSMUSG00000075046	10	57692727	57695421
Gm19459	ENSMUSG00000093601	10	57702361	57703408
Gm9987	ENSMUSG00000055958	10	58275322	58275890
Hsf2	ENSMUSG00000019878	10	57206191	57232939
Serinc1	ENSMUSG00000019877	10	57235580	57252336
Pkib	ENSMUSG00000019876	10	57351787	57460918
Fabp7	ENSMUSG00000019874	10	57504687	57508256
Smpdl3a	ENSMUSG00000019872	10	57514141	57531636
Dux	ENSMUSG00000058537	10	57685047	57688454
Gm4981	ENSMUSG00000075045	10	57697596	57699408
Gcc2	ENSMUSG00000038039	10	57718245	57768347
Lims1	ENSMUSG00000019920	10	57786214	57887439
Ranbp2	ENSMUSG00000003226	10	57909600	57956903
Ccdc138	ENSMUSG00000038010	10	57960718	58038990
Edar	ENSMUSG00000003227	10	58063537	58138402
Gm6494	ENSMUSG00000091526	10	58166743	58167027
Gm17542	ENSMUSG00000091731	10	58176354	58180958
Sh3rf3	ENSMUSG00000037990	10	58276107	58601664
4930467K11Rik	ENSMUSG00000085621	10	57198187	57206159
U6	ENSMUSG00000088253	10	56893836	56893935
SNORD113	ENSMUSG00000087994	10	58167324	58167399
U6	ENSMUSG00000070214	10	57812246	57812352
Sowahc	ENSMUSG00000071286	10	58684701	58689179
Gm10273	ENSMUSG00000069622	10	58858503	58859132
Sept10	ENSMUSG00000019917	10	58604398	58684595
P4ha1	ENSMUSG00000019916	10	58786044	58836052
SNORA17	ENSMUSG00000088744	10	58658447	58658573
Bicc1	ENSMUSG00000014329	10	70385580	70622448
Tfam	ENSMUSG00000003923	10	70688212	70701028
Ube2d1	ENSMUSG00000019927	10	70717728	70748010
Cisd1	ENSMUSG00000037710	10	70793228	70807702
Ipmk	ENSMUSG00000060733	10	70810511	70896075
Zwint	ENSMUSG00000019923	10	72117593	72137712
Gm15647	ENSMUSG00000090212	10	70545624	70546399
RP23-60H16.1	ENSMUSG00000093732	10	70773493	70776725
Gm4798	ENSMUSG00000044690	10	71167326	71168033
1700049L16Rik	ENSMUSG00000043859	10	71442638	71443442
Gm9923	ENSMUSG00000053830	10	71772069	71773907
SNORA17	ENSMUSG00000077642	10	71990298	71990430
SNORA17	ENSMUSG00000077142	10	71360784	71360914
Pcdh15	ENSMUSG00000052613	10	72562090	74112475
Pcdh15	ENSMUSG00000046980	10	72562202	72562673
Gm15398	ENSMUSG00000085456	10	72664147	72789775
Gm5778	ENSMUSG00000091825	10	72664443	72665514
Gm15397	ENSMUSG00000085176	10	72952722	72981138
Gm6407	ENSMUSG00000093548	10	73153005	73153553
Pawr	ENSMUSG00000035873	10	107769245	107851447
Syt1	ENSMUSG00000035864	10	107934706	108448038
Nav3	ENSMUSG00000020181	10	109119716	109437275
AC147634.1	ENSMUSG00000093762	10	107865123	107865216
U6	ENSMUSG00000065802	10	108805144	108805249
7SK	ENSMUSG00000088554	10	108527054	108527331
Gm6808	ENSMUSG00000090162	10	111526723	111527529
Gm15914	ENSMUSG00000089667	10	111538296	111538604
E2f7	ENSMUSG00000020185	10	110182495	110224440
Csrp2	ENSMUSG00000020186	10	110357232	110376678
Zdhhc17	ENSMUSG00000035798	10	110378838	110447122
Gm5428	ENSMUSG00000091086	10	110562907	110563794
Osbpl8	ENSMUSG00000020189	10	110601858	110734303
Bbs10	ENSMUSG00000035759	10	110735735	110738792
Nap1l1	ENSMUSG00000058799	10	110910248	110935198
Gm5176	ENSMUSG00000092020	10	110937795	110939019
Phlda1	ENSMUSG00000020205	10	110943342	110945705
Krr1	ENSMUSG00000063334	10	111409720	111425488
Glipr1	ENSMUSG00000056888	10	111422504	111439687
Glipr1l1	ENSMUSG00000020213	10	111497245	111515566
Glipr1l2	ENSMUSG00000020214	10	111520410	111545154
4933440J02Rik	ENSMUSG00000087191	10	111023775	111031329
SNORA17	ENSMUSG00000089461	10	110233229	110233356
SNORA40	ENSMUSG00000088447	10	110329354	110329475
U6	ENSMUSG00000087718	10	110341851	110341956
SNORA48	ENSMUSG00000087819	10	110918549	110918692
U6	ENSMUSG00000088553	10	110566163	110566265
Gal3st1	ENSMUSG00000049721	11	3883639	3899329
Sec14l4	ENSMUSG00000019368	11	3931465	3948027
Sec14l3	ENSMUSG00000054986	11	3964844	3977739
Mtfp1	ENSMUSG00000004748	11	3991483	3995448
Sec14l2	ENSMUSG00000003585	11	3997042	4023418
Rnf215	ENSMUSG00000003581	11	4035205	4041175
Ccdc157	ENSMUSG00000051427	11	4041126	4060296
Sf3a1	ENSMUSG00000002129	11	4060353	4082544
Tbc1d10a	ENSMUSG00000034412	11	4086792	4115508
Gatsl3	ENSMUSG00000020424	11	4118228	4122412
Osm	ENSMUSG00000058755	11	4136423	4141029
Lif	ENSMUSG00000034394	11	4157560	4172517
Hormad2	ENSMUSG00000020419	11	4245817	4341108
Mtmr3	ENSMUSG00000034354	11	4380871	4494866
Gm11032	ENSMUSG00000079010	11	4520070	4521701
Ascc2	ENSMUSG00000020412	11	4537750	4585702
Uqcr10	ENSMUSG00000059534	11	4601976	4604345
Zmat5	ENSMUSG00000009076	11	4604681	4637672
Cabp7	ENSMUSG00000009075	11	4636895	4646781
Nf2	ENSMUSG00000009073	11	4665848	4749539
Nipsnap1	ENSMUSG00000034285	11	4773954	4794203
Thoc5	ENSMUSG00000034274	11	4795323	4828870
Nefh	ENSMUSG00000020396	11	4838757	4848067
Ap1b1	ENSMUSG00000009090	11	4886827	4942732
Gas2l1	ENSMUSG00000034201	11	4954135	4965330
Rasl10a	ENSMUSG00000034209	11	4958131	4960388
Ewsr1	ENSMUSG00000009079	11	4969692	4999269
Rhbdd3	ENSMUSG00000034175	11	4998929	5006096
Gm11031	ENSMUSG00000079004	11	4999387	4999881
Emid1	ENSMUSG00000034164	11	5006268	5052260
Kremen1	ENSMUSG00000020393	11	5091555	5161561
Znrf3	ENSMUSG00000041961	11	5176327	5344850
Gm11946	ENSMUSG00000087291	11	3430160	3436859
Gm11947	ENSMUSG00000084962	11	3434241	3434910
Gm11949	ENSMUSG00000084211	11	3525480	3525851
Gm11950	ENSMUSG00000084310	11	3528827	3529664
Gm11951	ENSMUSG00000079889	11	3533015	3533445
Tug1	ENSMUSG00000056579	11	3539797	3548815
Gm16518	ENSMUSG00000083015	11	3597433	3598329
Gm11952	ENSMUSG00000084077	11	3772958	3773778
Gm11953	ENSMUSG00000082816	11	3851717	3852719
Gm11954	ENSMUSG00000084170	11	3902460	3902808
Gm11955	ENSMUSG00000082364	11	4007758	4008227
Gm11957	ENSMUSG00000083838	11	4029375	4030153
Gm11956	ENSMUSG00000084012	11	4130757	4131268
Gm11959	ENSMUSG00000085559	11	4174092	4181934
Gm11958	ENSMUSG00000085512	11	4185463	4186942
Gm11960	ENSMUSG00000081974	11	4463655	4464559
Gm11961	ENSMUSG00000056288	11	4520278	4530014
AA413626	ENSMUSG00000084381	11	4818513	4819006
Gm11962	ENSMUSG00000085232	11	5395195	5395449
Gm11963	ENSMUSG00000085189	11	5398843	5405702
Morc2a	ENSMUSG00000034543	11	3549497	3590480
Osbp2	ENSMUSG00000020435	11	3603734	3763906
4921536K21Rik	ENSMUSG00000020434	11	3786091	3795101
Dusp18	ENSMUSG00000047205	11	3795243	3801299
Slc35e4	ENSMUSG00000048807	11	3807024	3814667
Tcn2	ENSMUSG00000020432	11	3817195	3832162
4930556J24Rik	ENSMUSG00000034493	11	3837544	3876781
Pes1	ENSMUSG00000020430	11	3863978	3880007
Smtn	ENSMUSG00000020439	11	3417526	3440615
Selm	ENSMUSG00000075702	11	3414687	3417354
Mir3060	ENSMUSG00000093080	11	4039367	4039449
SNORA17	ENSMUSG00000088352	11	3688895	3688993
U4	ENSMUSG00000088250	11	3556666	3556794
U6	ENSMUSG00000064632	11	5151853	5151959
U6	ENSMUSG00000065627	11	4224152	4224258
SNORD125	ENSMUSG00000088634	11	4938214	4938310
Xbp1	ENSMUSG00000020484	11	5420662	5425896
Ccdc117	ENSMUSG00000020482	11	5428890	5442190
Ankrd36	ENSMUSG00000020481	11	5469687	5589340
Mrps24	ENSMUSG00000020477	11	5603986	5615683
Urgcp	ENSMUSG00000049680	11	5613420	5662379
Dbnl	ENSMUSG00000020476	11	5688491	5700965
Pgam2	ENSMUSG00000020475	11	5701643	5703736
Polm	ENSMUSG00000020474	11	5727863	5738019
Aebp1	ENSMUSG00000020473	11	5761950	5772091
Pold2	ENSMUSG00000020471	11	5772183	5778295
Myl7	ENSMUSG00000020469	11	5796640	5798785
Gck	ENSMUSG00000041798	11	5800823	5850084
Ykt6	ENSMUSG00000002741	11	5855696	5867783
Camk2b	ENSMUSG00000057897	11	5869647	5966365
Nudcd3	ENSMUSG00000053838	11	6005694	6100418
Npc1l1	ENSMUSG00000020447	11	6111016	6130146
Ddx56	ENSMUSG00000004393	11	6158922	6167775
Tmed4	ENSMUSG00000004394	11	6170372	6174873
Ogdh	ENSMUSG00000020456	11	6191636	6256645
Zmiz2	ENSMUSG00000041164	11	6289077	6306165
Ppia	ENSMUSG00000071866	11	6315446	6319820
H2afv	ENSMUSG00000041126	11	6327229	6344446
Purb	ENSMUSG00000091207	11	6374795	6375920
Purb	ENSMUSG00000049647	11	6367609	6369141
Myo1g	ENSMUSG00000020437	11	6406551	6420968
Ccm2	ENSMUSG00000000378	11	6446890	6496747
Nacad	ENSMUSG00000041073	11	6497826	6506056
Tbrg4	ENSMUSG00000000384	11	6515601	6526070
Wap	ENSMUSG00000000381	11	6531490	6538652
Ramp3	ENSMUSG00000041046	11	6558524	6577478
Gm11964	ENSMUSG00000081021	11	5534142	5534585
Gm11965	ENSMUSG00000081691	11	5578359	5578635
2210015D19Rik	ENSMUSG00000083844	11	5662132	5684713
Gm11966	ENSMUSG00000080904	11	5718500	5718586
Gm11967	ENSMUSG00000084819	11	5815318	5816734
Rps15a-ps6	ENSMUSG00000083022	11	6072647	6073039
Gm11969	ENSMUSG00000083209	11	6082682	6083037
Gm11402	ENSMUSG00000082640	11	6140212	6140520
Gm11401	ENSMUSG00000081153	11	6142381	6142724
Gm11970	ENSMUSG00000079988	11	6346221	6346540
Gm11971	ENSMUSG00000083693	11	6353154	6353441
Gm11972	ENSMUSG00000084280	11	6355520	6355908
Gm11973	ENSMUSG00000086839	11	6375428	6393538
Gm11974	ENSMUSG00000085156	11	6425594	6428763
Gm11975	ENSMUSG00000084231	11	6459026	6459506
Gm11978	ENSMUSG00000086373	11	6550151	6560236
Gm11980	ENSMUSG00000083075	11	6585827	6586812
Gm11981	ENSMUSG00000086808	11	6616004	6620040
Gm11976	ENSMUSG00000080833	11	6618921	6619498
Gm11977	ENSMUSG00000083819	11	6681681	6683141
Gm11979	ENSMUSG00000082579	11	6685841	6686583
Gm11982	ENSMUSG00000082897	11	6725499	6725812
Gm11983	ENSMUSG00000081213	11	6735629	6737657
AL646020.1	ENSMUSG00000092885	11	6372228	6372280
SNORA5	ENSMUSG00000064495	11	6519811	6519943
SNORA9	ENSMUSG00000064513	11	6428036	6428168
SNORA17	ENSMUSG00000077304	11	5460609	5460738
SNORA70	ENSMUSG00000088688	11	6446150	6446238
n-R5s67	ENSMUSG00000077524	11	6173314	6173427
Snora5c	ENSMUSG00000065686	11	6520322	6520457
Egfr	ENSMUSG00000020122	11	16652206	16818161
Gm17664	ENSMUSG00000091489	11	16662047	16662263
Fbxo48	ENSMUSG00000044966	11	16851378	16854775
Plek	ENSMUSG00000020120	11	16871209	16952384
Cnrip1	ENSMUSG00000044629	11	16951589	16979374
Ppp3r1	ENSMUSG00000033953	11	17059266	17100378
Wdr92	ENSMUSG00000078970	11	17082110	17135203
Pno1	ENSMUSG00000020116	11	17103201	17111571
C1d	ENSMUSG00000000581	11	17157582	17169179
Etaa1	ENSMUSG00000016984	11	17838759	17853878
Gm12663	ENSMUSG00000048149	11	16534866	16536110
Gm12664	ENSMUSG00000081332	11	16543012	16543924
E230015J15Rik	ENSMUSG00000085091	11	16715434	16730705
2810442I21Rik	ENSMUSG00000087060	11	16835157	16851285
Gm12014	ENSMUSG00000083752	11	16917855	16922083
Gm12013	ENSMUSG00000082099	11	16995493	16995647
Gm12015	ENSMUSG00000082797	11	17197580	17198422
Gm12016	ENSMUSG00000082411	11	17538506	17539186
2900053O20Rik	ENSMUSG00000086468	11	17853973	17859581
Gm12017	ENSMUSG00000084413	11	17873791	17874793
Gm12018	ENSMUSG00000085453	11	17995989	18003387
Gm12019	ENSMUSG00000080826	11	18106416	18106947
Gm12020	ENSMUSG00000081302	11	18225633	18227674
Gm12022	ENSMUSG00000085675	11	18367482	18393258
Gm12021	ENSMUSG00000082852	11	18408040	18409943
Gm12024	ENSMUSG00000081101	11	18477230	18478482
Gm12023	ENSMUSG00000085806	11	18495251	18610225
U6	ENSMUSG00000064831	11	16632608	16632714
BX255277.1	ENSMUSG00000076337	11	16545441	16545541
7SK	ENSMUSG00000087833	11	17448289	17448612
Gm12145	ENSMUSG00000085951	11	42919642	42929796
Gm12146	ENSMUSG00000085533	11	43010926	43073286
Gm12144	ENSMUSG00000086170	11	43043065	43045766
Gm12147	ENSMUSG00000086791	11	43073293	43124590
Gm12148	ENSMUSG00000084889	11	43198984	43200685
Gm12151	ENSMUSG00000084307	11	43276698	43276987
Gm12150	ENSMUSG00000085239	11	43393104	43394618
Gm12149	ENSMUSG00000082614	11	43428619	43429831
Gm12152	ENSMUSG00000083662	11	43484303	43484986
Gm12153	ENSMUSG00000087172	11	43772591	43948489
Gm12154	ENSMUSG00000086738	11	44079065	44080711
Gabrb2	ENSMUSG00000007653	11	42233259	42446092
Gm9972	ENSMUSG00000055456	11	42849248	42850780
Atp10b	ENSMUSG00000055415	11	42963379	43075787
Pttg1	ENSMUSG00000020415	11	43233752	43239753
Slu7	ENSMUSG00000020409	11	43247246	43261483
C1qtnf2	ENSMUSG00000046491	11	43287778	43305027
Ccnjl	ENSMUSG00000044707	11	43342286	43400499
4933415A04Rik	ENSMUSG00000045877	11	43400542	43402550
Fabp6	ENSMUSG00000020405	11	43409551	43415042
Pwwp2a	ENSMUSG00000044950	11	43495500	43534993
Ttc1	ENSMUSG00000041278	11	43543014	43561510
Adra1b	ENSMUSG00000050541	11	43588108	43714712
7SK	ENSMUSG00000084627	11	42710997	42711308
Mir146	ENSMUSG00000065601	11	43187899	43187963
Gm12177	ENSMUSG00000082946	11	47238766	47240761
Gm12176	ENSMUSG00000082792	11	47354934	47355808
Sgcd	ENSMUSG00000020354	11	46709755	47802471
Gnb2l1	ENSMUSG00000020372	11	48613834	48619936
Trim41	ENSMUSG00000040365	11	48619906	48630855
Gm12184	ENSMUSG00000078154	11	48638848	48640157
Trim7	ENSMUSG00000040350	11	48639642	48665711
Irgm1	ENSMUSG00000046879	11	48675470	48685185
Gm5431	ENSMUSG00000058163	11	48700924	48715654
Gm12185	ENSMUSG00000048852	11	48718158	48805728
Psme2b-ps	ENSMUSG00000078153	11	48758856	48759692
9930111J21Rik1	ENSMUSG00000069893	11	48759652	48792900
Olfr56	ENSMUSG00000040328	11	48792391	48948889
Tgtp1	ENSMUSG00000078922	11	48798829	48807674
9930111J21Rik2	ENSMUSG00000069892	11	48829376	48864744
Tgtp2	ENSMUSG00000078921	11	48870696	48877708
Ifi47	ENSMUSG00000078920	11	48890089	48910476
Olfr1396	ENSMUSG00000047511	11	48926279	48928376
Gm12186	ENSMUSG00000084153	11	48810189	48811215
Gm16170	ENSMUSG00000086245	11	48657150	48666995
Gm12187	ENSMUSG00000083178	11	48883198	48884572
Gm12188	ENSMUSG00000082116	11	48901736	48902045
Gm12178	ENSMUSG00000081952	11	48103486	48103815
Gm12179	ENSMUSG00000083954	11	48364755	48366026
Gm12180	ENSMUSG00000083159	11	48381857	48382517
Gm12181	ENSMUSG00000082250	11	48408781	48409311
Gm12182	ENSMUSG00000083460	11	48548056	48549063
Gm12183	ENSMUSG00000082454	11	48565369	48567216
U1	ENSMUSG00000065804	11	47725887	47726047
Snord96a	ENSMUSG00000064725	11	48615534	48615614
Snord95	ENSMUSG00000064780	11	48616641	48616708
SNORD95	ENSMUSG00000064500	11	48614368	48614434
SNORA17	ENSMUSG00000088425	11	48498211	48498329
Nmur2	ENSMUSG00000037393	11	55838489	55854512
Gria1	ENSMUSG00000020524	11	56824889	57143746
Fam114a2	ENSMUSG00000020523	11	57296492	57332146
Mfap3	ENSMUSG00000020522	11	57332166	57347317
Galnt10	ENSMUSG00000020520	11	57458944	57601016
Gm12239	ENSMUSG00000086020	11	55585590	55884350
Gm12240	ENSMUSG00000084169	11	56076357	56076585
Gm12241	ENSMUSG00000081749	11	56272851	56273576
Gm12242	ENSMUSG00000082476	11	57262609	57263346
Gm12243	ENSMUSG00000086028	11	57386014	57388097
4933424L21Rik	ENSMUSG00000085719	11	57437200	57462996
snoR38	ENSMUSG00000065635	11	56076667	56076742
SNORA70	ENSMUSG00000088228	11	56296451	56296546
Specc1	ENSMUSG00000042331	11	61770281	62036515
Adora2b	ENSMUSG00000018500	11	62062486	62079955
Zswim7	ENSMUSG00000014243	11	62080726	62094877
Ttc19	ENSMUSG00000042298	11	62094975	62141953
Ncor1	ENSMUSG00000018501	11	62129928	62272043
Pigl	ENSMUSG00000014245	11	62271787	62329795
Cenpv	ENSMUSG00000018509	11	62338448	62352763
Ubb	ENSMUSG00000019505	11	62364673	62366715
Trpv2	ENSMUSG00000018507	11	62387988	62414017
BC046404	ENSMUSG00000046417	11	62418386	62462025
Mmgt2	ENSMUSG00000048497	11	62462166	62479856
Zfp287	ENSMUSG00000005267	11	62513858	62545407
Gm10428	ENSMUSG00000072843	11	62565413	62567923
Zfp286	ENSMUSG00000047342	11	62566879	62602964
Trim16	ENSMUSG00000047821	11	62633733	62690964
Fbxw10	ENSMUSG00000090173	11	62660571	62690967
Fam18b	ENSMUSG00000014177	11	62692957	62730282
Cdrt4	ENSMUSG00000042200	11	62764695	62806597
Tekt3	ENSMUSG00000042189	11	62875156	62908466
Pmp22	ENSMUSG00000018217	11	62942484	62973049
Hs3st3b1	ENSMUSG00000070407	11	63699294	63735792
Cox10	ENSMUSG00000042148	11	63776129	63892970
Gm12289	ENSMUSG00000084884	11	63826117	63828726
Gm12275	ENSMUSG00000081340	11	62118366	62118672
Gm12276	ENSMUSG00000081944	11	62144923	62145223
Gm12278	ENSMUSG00000086310	11	62296299	62315206
Gm12949	ENSMUSG00000086636	11	62336243	62337044
Gm12279	ENSMUSG00000087120	11	62363549	62364543
Gm12280	ENSMUSG00000085748	11	62377979	62379885
2410006H16Rik	ENSMUSG00000086841	11	62416379	62418309
4930443B20Rik	ENSMUSG00000085762	11	62419268	62421250
4930557C09Rik	ENSMUSG00000085170	11	62448206	62452290
Gm12281	ENSMUSG00000081852	11	62510720	62511017
Gm12282	ENSMUSG00000084020	11	62563354	62566289
4921522H14Rik	ENSMUSG00000085045	11	62570680	62574060
Gm12283	ENSMUSG00000086674	11	62574738	62579056
Gm12284	ENSMUSG00000086677	11	62732581	62735094
Gm14526	ENSMUSG00000087039	11	62763927	62764581
4930452L02Rik	ENSMUSG00000087604	11	62803955	62817636
B430319H21Rik	ENSMUSG00000085532	11	62987416	63001956
Gm12285	ENSMUSG00000083052	11	63054745	63054977
Gm12286	ENSMUSG00000081600	11	63125812	63126813
B130011K05Rik	ENSMUSG00000085113	11	63226671	63231390
Gm12287	ENSMUSG00000082256	11	63413134	63414425
Gm12288	ENSMUSG00000083142	11	63630521	63631802
Hmgb1-ps3	ENSMUSG00000081455	11	63659685	63660320
9630013K17Rik	ENSMUSG00000086359	11	63777728	63781542
Snord65	ENSMUSG00000077457	11	62418017	62418088
Snord49a	ENSMUSG00000065734	11	62416952	62417023
SNORA67	ENSMUSG00000064692	11	62590487	62590627
Snord49b	ENSMUSG00000064437	11	62416581	62416652
Sdf2	ENSMUSG00000002064	11	78059248	78068998
2610507B11Rik	ENSMUSG00000010277	11	78075254	78104125
BC030499	ENSMUSG00000037593	11	78104343	78110307
Spag5	ENSMUSG00000002055	11	78115031	78135959
Aldoc	ENSMUSG00000017390	11	78136470	78141283
Pigs	ENSMUSG00000041958	11	78141917	78156284
Unc119	ENSMUSG00000002058	11	78156984	78162666
Foxn1	ENSMUSG00000002057	11	78171079	78200060
Slc13a2	ENSMUSG00000001095	11	78210589	78235719
Slc46a1	ENSMUSG00000020829	11	78279199	78285447
Sarm1	ENSMUSG00000050132	11	78285832	78311256
Vtn	ENSMUSG00000017344	11	78312593	78315826
Sebox	ENSMUSG00000001103	11	78316951	78318583
Tmem199	ENSMUSG00000051232	11	78320557	78325674
Poldip2	ENSMUSG00000001100	11	78325695	78336238
Tnfaip1	ENSMUSG00000017615	11	78336352	78349834
Ift20	ENSMUSG00000001105	11	78349863	78355239
Tmem97	ENSMUSG00000037278	11	78355319	78364279
Nlk	ENSMUSG00000017376	11	78380670	78510927
Fam58b	ENSMUSG00000049489	11	78564009	78565231
1810012P15Rik	ENSMUSG00000072640	11	78640086	78660372
Nos2	ENSMUSG00000020826	11	78734289	78773756
Lgals9	ENSMUSG00000001123	11	78776476	78798448
Ksr1	ENSMUSG00000018334	11	78826942	78959909
Wsb1	ENSMUSG00000017677	11	79052874	79068173
Gm9964	ENSMUSG00000055072	11	79109681	79110408
Nf1	ENSMUSG00000020716	11	79153195	79395114
Omg	ENSMUSG00000049612	11	79314484	79317586
Evi2b	ENSMUSG00000070354	11	79326887	79344061
Evi2a	ENSMUSG00000078771	11	79340062	79344111
Rab11fip4	ENSMUSG00000017639	11	79404714	79511525
Utp6	ENSMUSG00000035575	11	79745823	79775892
Suz12	ENSMUSG00000017548	11	79806608	79847625
Crlf3	ENSMUSG00000017561	11	79859995	79894470
Atad5	ENSMUSG00000017550	11	79902902	79949296
1110002N22Rik	ENSMUSG00000046909	11	79950180	79955677
Adap2	ENSMUSG00000020709	11	79967607	79992460
Rnf135	ENSMUSG00000020707	11	79997353	80013259
Rhot1	ENSMUSG00000017686	11	80022521	80081409
Gm11192	ENSMUSG00000086586	11	78092240	78092568
Gm11193	ENSMUSG00000087295	11	78106350	78107458
Gm11194	ENSMUSG00000085747	11	78207987	78219159
Gm11195	ENSMUSG00000086380	11	78257609	78258403
D11Bhm181e	ENSMUSG00000083176	11	78374821	78375102
Gm17235	ENSMUSG00000080180	11	78389739	78390852
Gm11196	ENSMUSG00000082110	11	78398663	78399057
Gm11197	ENSMUSG00000085115	11	78522240	78523263
Gm11201	ENSMUSG00000085941	11	78837099	78844559
Gm11200	ENSMUSG00000081000	11	79026298	79026745
Gm11198	ENSMUSG00000082304	11	79184759	79185732
Gm11199	ENSMUSG00000082529	11	79265443	79265949
AU040972	ENSMUSG00000091523	11	79295221	79297533
Gm11202	ENSMUSG00000087434	11	79420581	79436665
4930542H20Rik	ENSMUSG00000086569	11	79483874	79488630
Gm11205	ENSMUSG00000084969	11	79518132	79518922
9130204K15Rik	ENSMUSG00000086474	11	79595481	79685896
Gm11203	ENSMUSG00000083395	11	79710724	79711464
Gm11204	ENSMUSG00000082252	11	79719483	79719629
Gm11206	ENSMUSG00000086507	11	79972363	79991131
Gm16706	ENSMUSG00000086787	11	79830856	79843370
AL591376.1	ENSMUSG00000080600	11	78567928	78568024
U6	ENSMUSG00000088748	11	78637889	78637975
SNORA51	ENSMUSG00000065283	11	79707086	79707217
SNORA70	ENSMUSG00000089184	11	78375147	78375237
Mir193	ENSMUSG00000065395	11	79525471	79525536
U6	ENSMUSG00000064486	11	79408667	79408770
U6	ENSMUSG00000077574	11	79452523	79452630
U6	ENSMUSG00000088879	11	79448813	79448915
Mir365-2	ENSMUSG00000065489	11	79539902	79540013
U7	ENSMUSG00000088887	11	79582268	79582325
Atad2b	ENSMUSG00000052812	12	4924210	5050853
Klhl29	ENSMUSG00000020627	12	5084278	5382488
2810032G03Rik	ENSMUSG00000037735	12	5382676	5423436
5S_rRNA	ENSMUSG00000088209	12	5850518	5850632
AC165293.1	ENSMUSG00000093576	12	5585987	5586069
U6	ENSMUSG00000087780	12	5006072	5006174
4930555J06Rik	ENSMUSG00000086315	12	40764686	40766614
Gm17056	ENSMUSG00000090387	12	40925243	40927692
Gm17024	ENSMUSG00000090582	12	40936074	40937660
Gm7008	ENSMUSG00000035983	12	40949345	40955771
Zfp277	ENSMUSG00000055917	12	41041633	41172377
Dock4	ENSMUSG00000035954	12	41172640	41573073
Gm889	ENSMUSG00000071342	12	40902973	40925902
Ifrd1	ENSMUSG00000001627	12	40928154	40975091
Dgkb	ENSMUSG00000036095	12	38606761	39359997
Etv1	ENSMUSG00000004151	12	39505967	39594802
Arl4a	ENSMUSG00000047446	12	40732034	40764612
Scin	ENSMUSG00000002565	12	40786356	40860815
SNORA17	ENSMUSG00000077269	12	40348002	40348133
U7	ENSMUSG00000088214	12	39998052	39998114
SNORA17	ENSMUSG00000077700	12	40188117	40188243
Mir1938	ENSMUSG00000089371	12	40949299	40949398
Rpl18a-ps1	ENSMUSG00000059033	12	56496694	56497216
Gm9812	ENSMUSG00000046747	12	56921598	56922567
Gm6265	ENSMUSG00000066491	12	57474580	57474810
C87198	ENSMUSG00000092515	12	57692046	57695983
Gm15524	ENSMUSG00000089894	12	57790905	57793951
Mbip	ENSMUSG00000021028	12	57429293	57446881
Nkx2-1	ENSMUSG00000001496	12	57632922	57637895
Nkx2-9	ENSMUSG00000058669	12	57712376	57714271
Pax9	ENSMUSG00000001497	12	57792754	57813809
Slc25a21	ENSMUSG00000035472	12	57813621	58298459
Snx6	ENSMUSG00000005656	12	55847336	55896690
Cfl2	ENSMUSG00000062929	12	55959804	55963864
Baz1a	ENSMUSG00000035021	12	55993976	56115335
Gm20403	ENSMUSG00000092233	12	56087145	56087516
2700097O09Rik	ENSMUSG00000062198	12	56146648	56181097
Srp54b	ENSMUSG00000079108	12	56181483	56290200
Srp54a	ENSMUSG00000021020	12	56181557	56214680
Fam177a	ENSMUSG00000073083	12	56225515	56243065
1700047I17Rik2	ENSMUSG00000034953	12	56300579	56318129
Srp54c	ENSMUSG00000073079	12	56331155	56377912
Ppp2r3c	ENSMUSG00000021022	12	56381801	56403987
1110008L16Rik	ENSMUSG00000021023	12	56403624	56483478
Psma6	ENSMUSG00000021024	12	56485209	56519441
Nfkbia	ENSMUSG00000021025	12	56590398	56593634
Aldoart2	ENSMUSG00000063129	12	56666226	56667883
Insm2	ENSMUSG00000045440	12	56699904	56703005
Ralgapa1	ENSMUSG00000021027	12	56703916	56922154
Brms1l	ENSMUSG00000012076	12	56937353	56970722
SNORA17	ENSMUSG00000077177	12	57652446	57652577
SNORA17	ENSMUSG00000077455	12	57353302	57353431
U6	ENSMUSG00000088922	12	56098059	56098164
7SK	ENSMUSG00000088389	12	57367907	57368191
U6	ENSMUSG00000065244	12	57011808	57011910
AC159245.1	ENSMUSG00000093300	12	57157623	57157742
AC159624.1	ENSMUSG00000092949	12	56922050	56922140
Gm5185	ENSMUSG00000058933	12	64173832	64174128
Lrfn5	ENSMUSG00000035653	12	62624137	62958915
Spanxn4	ENSMUSG00000091396	12	63788809	63789231
U6	ENSMUSG00000088468	12	63021561	63021664
AC159639.1	ENSMUSG00000080349	12	63699879	63699997
7SK	ENSMUSG00000084664	12	62968043	62968355
U6	ENSMUSG00000064958	12	64710855	64710961
Mdga2	ENSMUSG00000034912	12	67572502	68323529
Rpl17-ps3	ENSMUSG00000069392	12	68611716	68612297
U2	ENSMUSG00000084448	12	68713283	68713468
[truncated: 404 more rows]

## Sheet: Venn
									1 common element in "DT", "PT", "FHA" and "Prn":						365 common elements in "DT", "PT" and "FHA":						40 common elements in "DT", "PT" and "Prn":
									ENSMUSG00000060534						ENSMUSG00000056536						ENSMUSG00000029377
															ENSMUSG00000026319						ENSMUSG00000029378
															ENSMUSG00000026321						ENSMUSG00000082361
															ENSMUSG00000067017						ENSMUSG00000034981
															ENSMUSG00000067015						ENSMUSG00000029397
									3 common elements in "PT", "FHA" and "Prn":						ENSMUSG00000076999						ENSMUSG00000060466
									ENSMUSG00000052812						ENSMUSG00000089206						ENSMUSG00000055801
									ENSMUSG00000020627						ENSMUSG00000038866						ENSMUSG00000029403
									ENSMUSG00000087780						ENSMUSG00000033488						ENSMUSG00000029405
															ENSMUSG00000087093						ENSMUSG00000029407
															ENSMUSG00000026589						ENSMUSG00000029409
									17 common elements in "DT", "FHA" and "Prn":						ENSMUSG00000004031						ENSMUSG00000029410
									ENSMUSG00000034848						ENSMUSG00000026587						ENSMUSG00000029413
									ENSMUSG00000064329						ENSMUSG00000070103						ENSMUSG00000029415
									ENSMUSG00000075316						ENSMUSG00000073530						ENSMUSG00000029417
									ENSMUSG00000085386						ENSMUSG00000000305						ENSMUSG00000034842
									ENSMUSG00000087301						ENSMUSG00000074518						ENSMUSG00000034855
									ENSMUSG00000080855						ENSMUSG00000039117						ENSMUSG00000034826
									ENSMUSG00000081307						ENSMUSG00000039108						ENSMUSG00000084111
									ENSMUSG00000088994						ENSMUSG00000027566						ENSMUSG00000060183
									ENSMUSG00000020524						ENSMUSG00000039086						ENSMUSG00000082068
									ENSMUSG00000020523						ENSMUSG00000039069						ENSMUSG00000092011
									ENSMUSG00000020522						ENSMUSG00000039059						ENSMUSG00000084745
									ENSMUSG00000020520						ENSMUSG00000039050						ENSMUSG00000088623
									ENSMUSG00000081749						ENSMUSG00000039041						ENSMUSG00000088949
									ENSMUSG00000082476						ENSMUSG00000015647						ENSMUSG00000088102
									ENSMUSG00000086028						ENSMUSG00000039001						ENSMUSG00000064533
									ENSMUSG00000085719						ENSMUSG00000038990						ENSMUSG00000088777
									ENSMUSG00000088228						ENSMUSG00000038980						ENSMUSG00000088712
															ENSMUSG00000015627						ENSMUSG00000093609
															ENSMUSG00000056061						ENSMUSG00000032251
															ENSMUSG00000038963						ENSMUSG00000088760
															ENSMUSG00000027568						ENSMUSG00000077415
															ENSMUSG00000027569						ENSMUSG00000089066
															ENSMUSG00000049401						ENSMUSG00000035873
															ENSMUSG00000027570						ENSMUSG00000093762
															ENSMUSG00000038932						ENSMUSG00000035864
															ENSMUSG00000038914						ENSMUSG00000088554
															ENSMUSG00000027573						ENSMUSG00000065802
															ENSMUSG00000023393						ENSMUSG00000020181
															ENSMUSG00000045493
															ENSMUSG00000083410
															ENSMUSG00000085704
															ENSMUSG00000082850
															ENSMUSG00000090589
															ENSMUSG00000084843
															ENSMUSG00000087550
															ENSMUSG00000074507
															ENSMUSG00000092827
															ENSMUSG00000080507
															ENSMUSG00000064422
															ENSMUSG00000065460
															ENSMUSG00000070144
															ENSMUSG00000045699
															ENSMUSG00000078587
															ENSMUSG00000061414
															ENSMUSG00000030350
															ENSMUSG00000030351
															ENSMUSG00000030352
															ENSMUSG00000056771
															ENSMUSG00000030353
															ENSMUSG00000001521
															ENSMUSG00000048668
															ENSMUSG00000001517
															ENSMUSG00000079304
															ENSMUSG00000001520
															ENSMUSG00000001518
															ENSMUSG00000030357
															ENSMUSG00000030359
															ENSMUSG00000047228
															ENSMUSG00000030361
															ENSMUSG00000037827
															ENSMUSG00000030363
															ENSMUSG00000030364
															ENSMUSG00000079299
															ENSMUSG00000030325
															ENSMUSG00000079298
															ENSMUSG00000090164
															ENSMUSG00000030365
															ENSMUSG00000000248
															ENSMUSG00000030154
															ENSMUSG00000030155
															ENSMUSG00000079295
															ENSMUSG00000081935
															ENSMUSG00000089728
															ENSMUSG00000085813
															ENSMUSG00000053173
															ENSMUSG00000085739
															ENSMUSG00000059659
															ENSMUSG00000058700
															ENSMUSG00000085786
															ENSMUSG00000079223
															ENSMUSG00000087150
															ENSMUSG00000082694
															ENSMUSG00000090933
															ENSMUSG00000090617
															ENSMUSG00000076327
															ENSMUSG00000088177
															ENSMUSG00000015202
															ENSMUSG00000064065
															ENSMUSG00000000766
															ENSMUSG00000078488
															ENSMUSG00000081926
															ENSMUSG00000019775
															ENSMUSG00000019774
															ENSMUSG00000019773
															ENSMUSG00000019772
															ENSMUSG00000046916
															ENSMUSG00000019769
															ENSMUSG00000077596
															ENSMUSG00000092769
															ENSMUSG00000087350
															ENSMUSG00000040653
															ENSMUSG00000091618
															ENSMUSG00000071434
															ENSMUSG00000019796
															ENSMUSG00000019795
															ENSMUSG00000040034
															ENSMUSG00000040021
															ENSMUSG00000019794
															ENSMUSG00000086086
															ENSMUSG00000080655
															ENSMUSG00000092190
															ENSMUSG00000019809
															ENSMUSG00000019808
															ENSMUSG00000019806
															ENSMUSG00000015501
															ENSMUSG00000091527
															ENSMUSG00000064531
															ENSMUSG00000020361
															ENSMUSG00000018239
															ENSMUSG00000049470
															ENSMUSG00000036216
															ENSMUSG00000044894
															ENSMUSG00000018238
															ENSMUSG00000072963
															ENSMUSG00000018387
															ENSMUSG00000049427
															ENSMUSG00000044352
															ENSMUSG00000054450
															ENSMUSG00000018398
															ENSMUSG00000018395
															ENSMUSG00000000869
															ENSMUSG00000020383
															ENSMUSG00000020380
															ENSMUSG00000036117
															ENSMUSG00000018899
															ENSMUSG00000091191
															ENSMUSG00000081769
															ENSMUSG00000078860
															ENSMUSG00000082263
															ENSMUSG00000085707
															ENSMUSG00000085718
															ENSMUSG00000086851
															ENSMUSG00000084373
															ENSMUSG00000086595
															ENSMUSG00000083986
															ENSMUSG00000084419
															ENSMUSG00000064719
															ENSMUSG00000018900
															ENSMUSG00000063652
															ENSMUSG00000020334
															ENSMUSG00000082271
															ENSMUSG00000082380
															ENSMUSG00000081098
															ENSMUSG00000080768
															ENSMUSG00000020388
															ENSMUSG00000018906
															ENSMUSG00000036045
															ENSMUSG00000086209
															ENSMUSG00000061533
															ENSMUSG00000020963
															ENSMUSG00000020962
															ENSMUSG00000020961
															ENSMUSG00000020964
															ENSMUSG00000085004
															ENSMUSG00000090722
															ENSMUSG00000086689
															ENSMUSG00000066389
															ENSMUSG00000060323
															ENSMUSG00000092100
															ENSMUSG00000084566
															ENSMUSG00000064548
															ENSMUSG00000089439
															ENSMUSG00000077096
															ENSMUSG00000080365
															ENSMUSG00000021294
															ENSMUSG00000047828
															ENSMUSG00000043122
															ENSMUSG00000054013
															ENSMUSG00000037679
															ENSMUSG00000011148
															ENSMUSG00000064326
															ENSMUSG00000001729
															ENSMUSG00000037638
															ENSMUSG00000072825
															ENSMUSG00000052160
															ENSMUSG00000072812
															ENSMUSG00000037594
															ENSMUSG00000047832
															ENSMUSG00000021298
															ENSMUSG00000091222
															ENSMUSG00000002799
															ENSMUSG00000002804
															ENSMUSG00000011158
															ENSMUSG00000002803
															ENSMUSG00000021143
															ENSMUSG00000012211
															ENSMUSG00000021144
															ENSMUSG00000006356
															ENSMUSG00000006360
															ENSMUSG00000037466
															ENSMUSG00000049036
															ENSMUSG00000087642
															ENSMUSG00000076612
															ENSMUSG00000090726
															ENSMUSG00000078993
															ENSMUSG00000051804
															ENSMUSG00000043945
															ENSMUSG00000090980
															ENSMUSG00000076611
															ENSMUSG00000076613
															ENSMUSG00000076614
															ENSMUSG00000076615
															ENSMUSG00000076617
															ENSMUSG00000076618
															ENSMUSG00000076619
															ENSMUSG00000076620
															ENSMUSG00000076621
															ENSMUSG00000076622
															ENSMUSG00000076623
															ENSMUSG00000091062
															ENSMUSG00000076624
															ENSMUSG00000091857
															ENSMUSG00000076625
															ENSMUSG00000091051
															ENSMUSG00000091630
															ENSMUSG00000076626
															ENSMUSG00000092160
															ENSMUSG00000091334
															ENSMUSG00000076627
															ENSMUSG00000091394
															ENSMUSG00000076628
															ENSMUSG00000091704
															ENSMUSG00000076629
															ENSMUSG00000090563
															ENSMUSG00000076630
															ENSMUSG00000076631
															ENSMUSG00000091517
															ENSMUSG00000076632
															ENSMUSG00000091606
															ENSMUSG00000076633
															ENSMUSG00000076634
															ENSMUSG00000076635
															ENSMUSG00000076636
															ENSMUSG00000076637
															ENSMUSG00000076638
															ENSMUSG00000090395
															ENSMUSG00000076639
															ENSMUSG00000076640
															ENSMUSG00000076641
															ENSMUSG00000076642
															ENSMUSG00000076643
															ENSMUSG00000076645
															ENSMUSG00000076646
															ENSMUSG00000076647
															ENSMUSG00000076648
															ENSMUSG00000076649
															ENSMUSG00000076650
															ENSMUSG00000076651
															ENSMUSG00000076652
															ENSMUSG00000076653
															ENSMUSG00000076654
															ENSMUSG00000076655
															ENSMUSG00000076669
															ENSMUSG00000076657
															ENSMUSG00000076658
															ENSMUSG00000078992
															ENSMUSG00000076659
															ENSMUSG00000076660
															ENSMUSG00000076661
															ENSMUSG00000092748
															ENSMUSG00000092737
															ENSMUSG00000087842
															ENSMUSG00000092683
															ENSMUSG00000056553
															ENSMUSG00000065538
															ENSMUSG00000041992
															ENSMUSG00000089482
															ENSMUSG00000021175
															ENSMUSG00000018581
															ENSMUSG00000093544
															ENSMUSG00000088593
															ENSMUSG00000025323
															ENSMUSG00000088797
															ENSMUSG00000065348
															ENSMUSG00000022307
															ENSMUSG00000042895
															ENSMUSG00000086242
															ENSMUSG00000088469
															ENSMUSG00000038736
															ENSMUSG00000022338
															ENSMUSG00000038725
															ENSMUSG00000088756
															ENSMUSG00000065855
															ENSMUSG00000077181
															ENSMUSG00000022339
															ENSMUSG00000022340
															ENSMUSG00000090446
															ENSMUSG00000022342
															ENSMUSG00000060530
															ENSMUSG00000058463
															ENSMUSG00000085947
															ENSMUSG00000089589
															ENSMUSG00000089137
															ENSMUSG00000004842
															ENSMUSG00000004843
															ENSMUSG00000091243
															ENSMUSG00000088181
															ENSMUSG00000064449
															ENSMUSG00000064115
															ENSMUSG00000092599
															ENSMUSG00000092400
															ENSMUSG00000045178
															ENSMUSG00000082823
															ENSMUSG00000046201
															ENSMUSG00000023800
															ENSMUSG00000036983
															ENSMUSG00000091530
															ENSMUSG00000023802
															ENSMUSG00000068141
															ENSMUSG00000089690
															ENSMUSG00000044697
															ENSMUSG00000023795
															ENSMUSG00000088244
															ENSMUSG00000075813
															ENSMUSG00000024513
															ENSMUSG00000053477
															ENSMUSG00000086824
															ENSMUSG00000084948
															ENSMUSG00000038903
															ENSMUSG00000024511
															ENSMUSG00000024512
															ENSMUSG00000044906
															ENSMUSG00000079608
															ENSMUSG00000038425
															ENSMUSG00000064706
															ENSMUSG00000058078
															ENSMUSG00000063586
															ENSMUSG00000059105
															ENSMUSG00000057270
															ENSMUSG00000056858
															ENSMUSG00000045395
															ENSMUSG00000044040
															ENSMUSG00000045678
															ENSMUSG00000061387
															ENSMUSG00000051156
															ENSMUSG00000050865
															ENSMUSG00000047207
															ENSMUSG00000048356
															ENSMUSG00000054526
															ENSMUSG00000062314
															ENSMUSG00000024642
															ENSMUSG00000077291
															ENSMUSG00000084675
